# Supplementary material for: Assessing the Link between Diabetic Metabolic Dysregulation and Breast Cancer Progression
Source: MDPI journal article supplement (doi:10.3390/ijms241411816), 2023-07-23
Supplement: s1 [file s1]

**Table 1 Primers sequence used for RTPCR.**

|   | Gene name | Forward                     | Reverse                     | Citation | Annealing temperature |
|---|-----------|-----------------------------|-----------------------------|----------|-----------------------|
| 1 | PAK1      | GGTGGTGGCTGCACAGTAG         | TCTGAGGCAGGAGGTGGTAA        | (1)      | 58°C                  |
| 2 | ALDH1A3   | TGGATCAACTGCTACAACGC        | CACTTCTGTGTATTCGGCCA        | (2)      | 60°C                  |
| 3 | FGFR3     | CCTCGGGAGATGACGAAGAC        | CGGGCCGTGTCCAGTAAGG         | (3)      | 60°C                  |
| 4 | CDCA5     | ATC CAC CTC GCA GGA GCC CTA | CTC TCC TTC CTT GGA GCT GGA | (4)      | 60°C                  |
| 5 | TGFA      | CCG AGG CAG TCA GAT CAT CTT | AGC TGC CCC TCA GCT TGA     | (5)      | 60°C                  |

**Table 2S** Differentially upregulated genes by hyperglycemia treatment

| Gene Symbol | Average of the fold | P_Value | Gene                                                               |
|-------------|---------------------|---------|--------------------------------------------------------------------|
| PAN3        | 2.794               | 0.000   | PAN3 poly(A) specific ribonuclease subunit                         |
| CDCA5       | 4.833               | 0.000   | cell division cycle associated 5                                   |
| ZNF550      | 2.424               | 0.001   | zinc finger protein 550                                            |
| OLA1        | 2.789               | 0.001   | Obg-like ATPase 1                                                  |
| TSTD2       | 2.356               | 0.001   | thiosulfate sulfurtransferase (rhodanese)-like domain containing 2 |
| CALML4      | 2.308               | 0.001   | calmodulin-like 4                                                  |
| STAC3       | 2.435               | 0.001   | SH3 and cysteine rich domain 3                                     |
| FAM219A     | 3.515               | 0.001   | family with sequence similarity 219, member A                      |
| MUC3A       | 2.360               | 0.002   | mucin 3A, cell surface associated                                  |
| TINAGL1     | 2.085               | 0.002   | tubulointerstitial nephritis antigen-like 1                        |
| DCLRE1C     | 2.059               | 0.003   | DNA cross-link repair 1C                                           |
| CBX2        | 4.939               | 0.003   | chromobox homolog 2                                                |
| TMEM71      | 2.657               | 0.006   | transmembrane protein 71                                           |
| SLITRK6     | 2.578               | 0.008   | SLIT and NTRK-like family, member 6                                |
| TGFA        | 2.111               | 0.011   | transforming growth factor, alpha                                  |
| C3AR1       | 2.029               | 0.013   | complement component 3a receptor 1                                 |

The results are presented as fold change and normalized to folds of gene expression in normal glucose levels cultured cells. N=2

MCF7 cells were cultured in 30 mM glucose for 72 hrs.

**Table 3S** Differentially upregulated genes by hyperinsulinemia treatment

| Gene Name | Folds' average | P_Value | Description                        |
|-----------|----------------|---------|------------------------------------|
| TGFA      | 2.195          | 0.000   | transforming growth factor, alpha  |
| ECH1      | 4.088          | 0.000   | enoyl CoA hydratase 1, peroxisomal |
| CALML4    | 2.595          | 0.000   | calmodulin-like 4                  |

|          |       |       |                                                                    |
|----------|-------|-------|--------------------------------------------------------------------|
| CDCA5    | 4.814 | 0.000 | cell division cycle associated 5                                   |
| TSTD2    | 2.477 | 0.001 | thiosulfate sulfurtransferase (rhodanese)-like domain containing 2 |
| DCLRE1C  | 2.251 | 0.001 | DNA cross-link repair 1C                                           |
| MUC3A    | 2.405 | 0.001 | mucin 3A, cell surface associated                                  |
| C19orf68 | 3.667 | 0.002 | chromosome 19 open reading frame 68                                |
| PCM1     | 3.302 | 0.002 | pericentriolar material 1                                          |
| PAN3     | 2.709 | 0.003 | PAN3 poly(A) specific ribonuclease subunit                         |
| FAM69A   | 2.874 | 0.003 | family with sequence similarity 69, member A                       |
| LIMD1    | 2.877 | 0.003 | LIM domains containing 1                                           |
| GRIK2    | 2.775 | 0.004 | glutamate receptor, ionotropic, kainate 2                          |
| HIF3A    | 2.003 | 0.005 | hypoxia inducible factor 3, alpha subunit                          |
| STAC3    | 2.604 | 0.006 | SH3 and cysteine rich domain 3                                     |
| DDIT3    | 2.786 | 0.009 | DNA-damage-inducible transcript 3                                  |
| AKR1B1   | 2.048 | 0.017 | aldo-keto reductase family 1, member B1 (aldose reductase)         |
| ZC3H12D  | 2.053 | 0.040 | zinc finger CCCH-type containing 12D                               |

The results are presented as fold change and normalized to folds of gene expression in normal glucose levels cultured cells. N=2

MCF7 cells were cultured in 25 nM insulin for 72 hrs.

**Table 4S** Differentially upregulated genes shared between different treatments.

| HGI/NGI | HG/HGI  | NGI/HG | HG/HGI/NGI |
|---------|---------|--------|------------|
| PCM1    | ZNF55   | TGFA   | PAN3       |
| FAM69A  | FAM219A | CALML4 | CDCA5      |
| LIMD1   | SLITRK6 | MUC3A  | TSTD2      |
|         | C3AR1   |        | STAC3      |
|         |         |        | DCRE1C     |

References:

1. Fu H, Zhang W, Yuan Q, Niu M, Zhou F, Qiu Q, et al. PAK1 Promotes the Proliferation and Inhibits Apoptosis of Human Spermatogonial Stem Cells via PDK1/KDR/ZNF367 and ERK1/2 and AKT Pathways. *Mol Ther Nucleic Acids*. 2018;12:769-86.
2. Sullivan KE, Rojas K, Cerione RA, Nakano I, Wilson KF. The stem cell/cancer stem cell marker ALDH1A3 regulates the expression of the survival factor tissue transglutaminase, in mesenchymal glioma stem cells. *Oncotarget*. 2017;8(14):22325-43.
3. Tomlinson DC, L'Hôte CG, Kennedy W, Pitt E, Knowles MA. Alternative splicing of fibroblast growth factor receptor 3 produces a secreted isoform that inhibits fibroblast growth factor-induced proliferation and is repressed in urothelial carcinoma cell lines. *Cancer Res*. 2005;65(22):10441-9.
4. Tokuzen N, Nakashiro K, Tanaka H, Iwamoto K, Hamakawa H. Therapeutic potential of targeting cell division cycle associated 5 for oral squamous cell carcinoma. *Oncotarget*. 2016;7(3):2343-53.
5. Carneiro JR, Fuzii HT, Kayser C, Alberto FL, Soares FA, Sato EI, et al. IL-2, IL-5, TNF- $\alpha$  and IFN- $\gamma$  mRNA expression in epidermal keratinocytes of systemic lupus erythematosus skin lesions. *Clinics (Sao Paulo)*. 2011;66(1):77-82.
