# Supplementary material for: Assessing the Link between Diabetic Metabolic Dysregulation and Breast Cancer Progression
Source: MDPI journal article supplement (doi:10.3390/ijms241411816), 2023-07-23
Supplement: s1 [file s1]

Assay Class: Eukaryote Total RNA Nano  
 Comparison: C:\...rt\Comparison\ComparisonFile10\_Eukaryote Total RNA Nano.xac

Created: 1/14/2019 4:48:19 PM  
 Modified: 1/14/2019 4:48:19 PM

### Electropherogram Summary

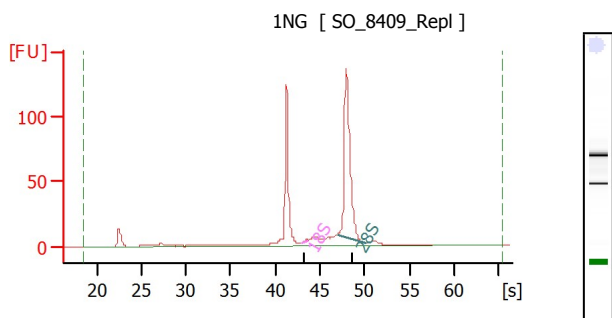

**Overall Results for sample 1 :** 1NG  
 RNA Area: 440.9  
 RNA Concentration: 250 ng/μl  
 rRNA Ratio [28s / 18s]: 145.7  
 RNA Integrity Number (RIN): 6.8 (B.02.09)  
 Result Flagging Color:    
 Result Flagging Label: RIN: 6.80

**Fragment table for sample 1 :** 1NG

| Name | Start Time [s] | End Time [s] | Area  | % of total Area |
|------|----------------|--------------|-------|-----------------|
| 18S  | 42.91          | 43.77        | 1.4   | 0.3             |
| 28S  | 46.99          | 50.08        | 199.9 | 45.3            |

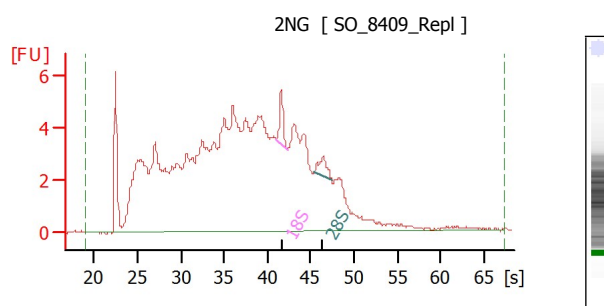

**Overall Results for sample 2 :** 2NG  
 RNA Area: 225.9  
 RNA Concentration: 196 ng/μl  
 rRNA Ratio [28s / 18s]: 0.8  
 RNA Integrity Number (RIN): 2.9 (B.02.09)  
 Result Flagging Color:    
 Result Flagging Label: RIN: 2.90

**Fragment table for sample 2 :** 2NG

| Name | Start Time [s] | End Time [s] | Area | % of total Area |
|------|----------------|--------------|------|-----------------|
| 18S  | 41.05          | 42.27        | 2.2  | 1.0             |
| 28S  | 45.39          | 47.44        | 1.7  | 0.7             |

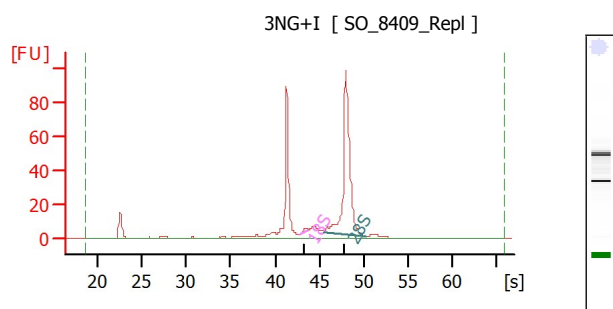

**Overall Results for sample 3 :** 3NG+I  
 RNA Area: 356.6  
 RNA Concentration: 202 ng/μl  
 rRNA Ratio [28s / 18s]: 86.1  
 RNA Integrity Number (RIN): 6.7 (B.02.09)  
 Result Flagging Color:    
 Result Flagging Label: RIN: 6.70

**Fragment table for sample 3 :** 3NG+I

| Name | Start Time [s] | End Time [s] | Area  | % of total Area |
|------|----------------|--------------|-------|-----------------|
| 18S  | 42.85          | 43.81        | 1.9   | 0.5             |
| 28S  | 45.48          | 50.16        | 163.4 | 45.8            |

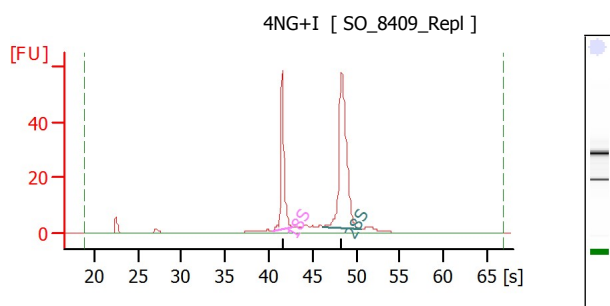

**Overall Results for sample 4 :** 4NG+I  
 RNA Area: 238.8  
 RNA Concentration: 207 ng/μl  
 rRNA Ratio [28s / 18s]: 2.0  
 RNA Integrity Number (RIN): 9.9 (B.02.09)  
 Result Flagging Color:    
 Result Flagging Label: RIN: 9.90

**Fragment table for sample 4 :** 4NG+I

| Name | Start Time [s] | End Time [s] | Area  | % of total Area |
|------|----------------|--------------|-------|-----------------|
| 18S  | 40.39          | 42.87        | 57.4  | 24.1            |
| 28S  | 46.26          | 50.48        | 113.9 | 47.7            |

Assay Class: Eukaryote Total RNA Nano  
Comparison: C:\...rt\Comparison\ComparisonFile10\_Eukaryote Total RNA Nano.xac

Created: 1/14/2019 4:48:19 PM  
Modified: 1/14/2019 4:48:19 PM

**Electropherogram Summary Continued ...**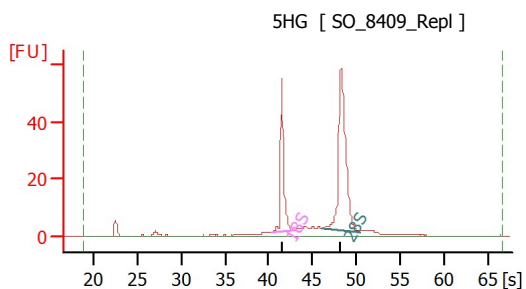**Overall Results for sample 5 : 5HG**

RNA Area: 238.6  
RNA Concentration: 207 ng/μl  
rRNA Ratio [28s / 18s]: 2.0  
RNA Integrity Number (RIN): 9.9 (B.02.09)  
Result Flagging Color:    
Result Flagging Label: RIN: 9.90

**Fragment table for sample 5 : 5HG**

| Name | Start Time [s] | End Time [s] | Area  | % of total Area |
|------|----------------|--------------|-------|-----------------|
| 18S  | 40.40          | 42.82        | 54.9  | 23.0            |
| 28S  | 46.16          | 50.47        | 109.3 | 45.8            |

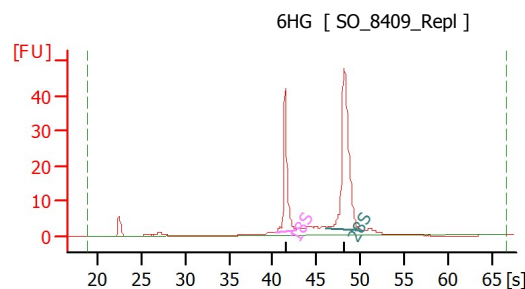**Overall Results for sample 6 : 6HG**

RNA Area: 187.2  
RNA Concentration: 162 ng/μl  
rRNA Ratio [28s / 18s]: 2.1  
RNA Integrity Number (RIN): 10 (B.02.09)  
Result Flagging Color:    
Result Flagging Label: RIN: 10

**Fragment table for sample 6 : 6HG**

| Name | Start Time [s] | End Time [s] | Area | % of total Area |
|------|----------------|--------------|------|-----------------|
| 18S  | 40.31          | 42.73        | 41.8 | 22.3            |
| 28S  | 46.21          | 50.23        | 87.8 | 46.9            |

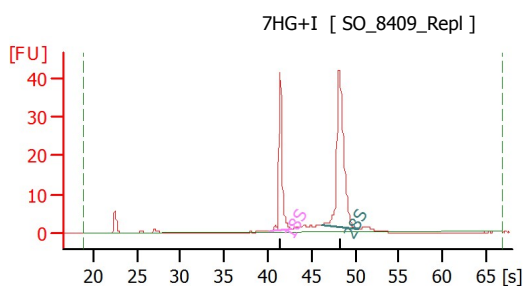**Overall Results for sample 7 : 7HG+I**

RNA Area: 157.0  
RNA Concentration: 136 ng/μl  
rRNA Ratio [28s / 18s]: 2.0  
RNA Integrity Number (RIN): 9.9 (B.02.09)  
Result Flagging Color:    
Result Flagging Label: RIN: 9.90

**Fragment table for sample 7 : 7HG+I**

| Name | Start Time [s] | End Time [s] | Area | % of total Area |
|------|----------------|--------------|------|-----------------|
| 18S  | 40.30          | 42.72        | 38.4 | 24.5            |
| 28S  | 46.16          | 50.29        | 76.7 | 48.8            |

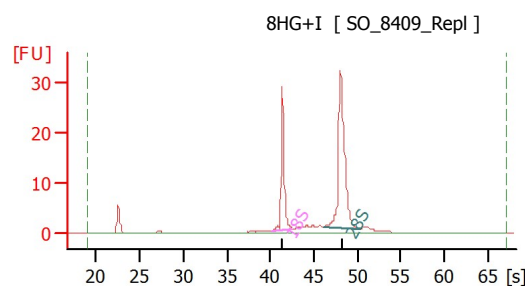**Overall Results for sample 8 : 8HG+I**

RNA Area: 111.6  
RNA Concentration: 97 ng/μl  
rRNA Ratio [28s / 18s]: 2.1  
RNA Integrity Number (RIN): 10 (B.02.09)  
Result Flagging Color:    
Result Flagging Label: RIN: 10

**Fragment table for sample 8 : 8HG+I**

| Name | Start Time [s] | End Time [s] | Area | % of total Area |
|------|----------------|--------------|------|-----------------|
| 18S  | 40.18          | 42.56        | 25.5 | 22.9            |
| 28S  | 46.07          | 50.31        | 54.6 | 49.0            |

Assay Class: Eukaryote Total RNA Nano  
Comparison: C:\...rt\Comparison\ComparisonFile10\_Eukaryote Total RNA Nano.xac

Created: 1/14/2019 4:48:19 PM  
Modified: 1/14/2019 4:48:19 PM

**Electropherogram Summary Continued ...**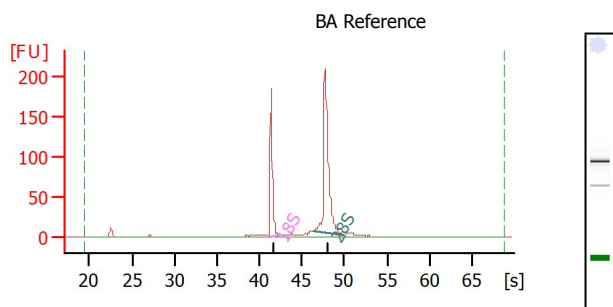**Overall Results for sample 9 : BA Reference**

RNA Area: 533.0  
RNA Concentration: 489 ng/μl  
rRNA Ratio [28s / 18s]: 1.9  
RNA Integrity Number (RIN): 10 (B.02.08)  
Result Flagging Color:    
Result Flagging Label: RIN:10

**Fragment table for sample 9 : BA Reference**

| Name | Start Time [s] | End Time [s] | Area  | % of total Area |
|------|----------------|--------------|-------|-----------------|
| 18S  | 41.06          | 42.31        | 140.5 | 26.4            |
| 28S  | 46.35          | 49.89        | 269.8 | 50.6            |

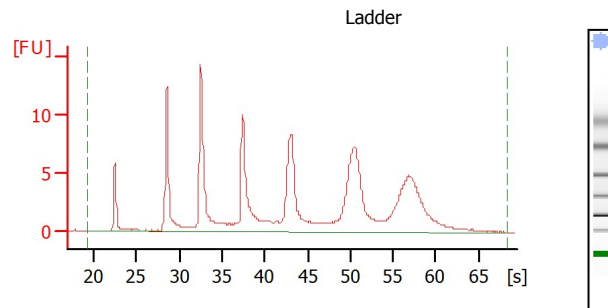**Overall Results for sample 10 : Ladder**

RNA Area: 173.2  
RNA Concentration: 150 ng/μl  
Result Flagging Color:    
Result Flagging Label: All Other Samples

**Fragment table for sample 10 : Ladder**

| Name | Start Time [s] | End Time [s] | Area | % of total Area |
|------|----------------|--------------|------|-----------------|
| 18S  | 40.18          | 42.56        | 25.5 | 22.9            |
| 28S  | 46.07          | 50.31        | 54.6 | 49.0            |
