# Supplementary material for: Assessing the Link between Diabetic Metabolic Dysregulation and Breast Cancer Progression
Source: MDPI journal article supplement (doi:10.3390/ijms241411816), 2023-07-23
Supplement: s1 [file s1]

# Microarray Quality Control Analysis Report

(Genotypic Project No: SO\_8409)

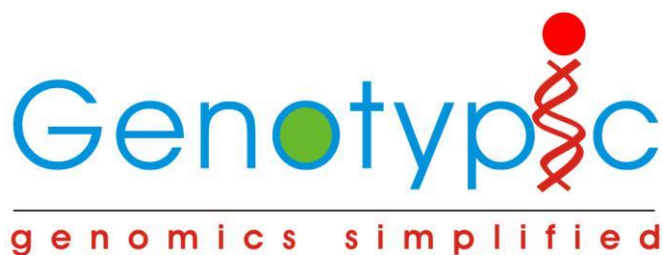

**For**  
**Dr. Shivang**

## **Index**

| <b>Content</b>                   | <b>Page#</b> |
|----------------------------------|--------------|
| <b>Microarray Project Plan</b>   | <b>3</b>     |
| <b>Total RNA Quality Control</b> | <b>4</b>     |
| <b>Labeling Quality Control</b>  | <b>4</b>     |
| <b>Image Quality Control</b>     | <b>6</b>     |

## Microarray Project Plan

- . **Organism:** Human
- **Slides:** Human 8X60K GXP **AMADID:**072363
- **Starting material:** RNA
- **Labeling kit:** Agilent's Quick-Amp labeling Kit (p/n:5190-0442)
- **Labeling Method:** T7 promoter based-linear amplification to generate labeled complementary RNA (One-Color Microarray-Based Gene Expression Analysis)
- **Total RNA and cRNA Purification Kit:** Qiagen's RNeasyminikit Cat#74106
- **Hybridization Kit:** Agilent's In situ Hybridization kit 5190-6420.
- RNA quality was checked using Bioanalyzer

### Total RNA Quality Control

Please refer to the folder “Bioanalyzer\_Reports\_SO\_8409” containing “RNA QC report\_SO\_8409.pdf” and “Bioanalyzer Profile SO\_8409.pdf” for samples.

### Labeling Quality Control

#### Labeling QC to check incorporation of Cy3 of labeled RNA

Samples were labeled using the Agilent Quick-Amp labeling Kit. QC was performed using Nanodrop.

#### Nanodrop Analysis of labeled cRNA

| Sample Details | Dye | pmol/μl | ng/μl | 260/280 | Specific Activity |
|----------------|-----|---------|-------|---------|-------------------|
| NG_1           | Cy3 | 0.6     | 56.8  | 2.37    | 10.56             |
| NG_2           | Cy3 | 0.6     | 65    | 2.29    | 9.23              |
| NG+I_1         | Cy3 | 0.9     | 52.5  | 2.44    | 17.14             |
| NG+I_2         | Cy3 | 0.7     | 62.9  | 2.26    | 11.13             |
| HG_1           | Cy3 | 0.6     | 72.5  | 1.92    | 8.28              |
| HG_2           | Cy3 | 0.7     | 64.4  | 2.32    | 10.87             |
| HG+I_1         | Cy3 | 0.7     | 64.8  | 2.19    | 10.80             |
| HG+I_2         | Cy3 | 0.6     | 49.9  | 2.2     | 12.02             |

**Note: Specific Activity greater than 8.0 is Good.  
Specific Activity 5.0 to 8.0 is Optimal.**

**Specific Activity less than 5.0 is not suitable for Hybridization**

**Comments: The amplified and labeled cRNA is suitable for Hybridization.**

### Hybridization Design

| Slide ID         | Sample Hybridised |
|------------------|-------------------|
| 257236322271_1_1 | NG_1              |
| 257236322271_1_2 | NG_2              |
| 257236322271_1_3 | NG+I_1            |
| 257236322271_1_4 | NG+I_2            |
| 257236322271_2_1 | HG_1              |
| 257236322271_2_2 | HG_2              |
| 257236322271_2_3 | HG+I_1            |
| 257236322271_2_4 | HG+I_2            |

### Image Quality control

**Image Quality Control:** The images were manually verified and found to be devoid of uneven hybridization, streaks, blobs and other artifacts. Hybridization across the slide was good based on number of feature that were “g is PosAndSignif” which indicates feature is positive and significantly above background.

Comments: The microarray images were overall clean and with very low background noise.

---

**End of Quality Control Report**

**For queries and clarifications on data analysis report / discuss new projects:**

[services@genotypic.co.in](mailto:services@genotypic.co.in), [contact@genotypic.co.in](mailto:contact@genotypic.co.in)

**Tel: +91- 80- 40538200 AND +91- 80- 23516444 Telefax: +91- 80- 40538222**

**USA / International Hotline: +1-(215) 253 4495 Web: [www.genotypic.co.in](http://www.genotypic.co.in)**

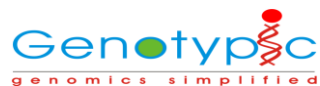

Genotypic Project No : SO\_8409\_Repl

## RNA Quality Control Report

Customer name : Dr Samrein Ahmed, University of Sharjah.

Samples Shipped as : Total RNA

No. of samples processed :8

Method of extraction : RNA QC only

RNA Concentration and Purity of samples estimated using Nanodrop Spectrophotometer:

| Sl. No. | Sample Name         | Date      | Absorbance value<br>260/280 | Absorbance value<br>260/230 | RNA Concentration<br>ng/μl | Volume(μl) | Total yield in<br>ng | QC Purity | QC<br>concentration/yield | QC Integrity |
|---------|---------------------|-----------|-----------------------------|-----------------------------|----------------------------|------------|----------------------|-----------|---------------------------|--------------|
| 1       | SO_8409_REPL_1 NG   | 1/10/2019 | 2.09                        | 1.62                        | 392.3                      | 50         | 19615                | Optimal   | Optimal                   | Optimal      |
| 2       | SO_8409_REPL_2 NG   | 1/10/2019 | 2.08                        | 1.61                        | 391.8                      | 30         | 11754                | Optimal   | Optimal                   | Degraded     |
| 3       | SO_8409_REPL_3 NG+I | 1/10/2019 | 2.1                         | 1.45                        | 325.7                      | 45         | 14656.5              | Optimal   | Optimal                   | Optimal      |
| 4       | SO_8409_REPL_4 NG+I | 1/10/2019 | 2.1                         | 1.93                        | 601.5                      | 40         | 24060                | Optimal   | Optimal                   | Optimal      |
| 5       | SO_8409_REPL_5 HG   | 1/10/2019 | 2.11                        | 1.9                         | 234.7                      | 45         | 10561.5              | Optimal   | Optimal                   | Optimal      |
| 6       | SO_8409_REPL_6 HG   | 1/10/2019 | 2.1                         | 1.84                        | 360.1                      | 45         | 16204.5              | Optimal   | Optimal                   | Optimal      |
| 7       | SO_8409_REPL_7 HG+I | 1/10/2019 | 2.05                        | 1.9                         | 502.6                      | 45         | 22617                | Optimal   | Optimal                   | Optimal      |
| 8       | SO_8409_REPL_8 HG+I | 1/10/2019 | 1.59                        | 1.34                        | 517.9                      | 40         | 20716                | Optimal   | Optimal                   | Optimal      |

An aliquot of the samples was run on an Agilent Bioanalyzer to check for integrity. Please refer to the accompanying file "SO\_8409\_repl.pdf" for Bioanalyser profiles of the RNA samples.

Comments : 7/8 QC Passed

OPTIMAL: Optimal purity (OD260/280 &gt;1.7 and &lt;2.2; OD260/230&gt;0.5 and &lt;2.5);

Sub-Optimal: Sub-Optimal purity (OD260/280&lt;1.7 and OD 260/230&lt;0.5 and &gt;2.5);

Optimal: optimal concentration (&gt;30 ng/microlitre and &lt;2500 ng/microlitre);

Sub-Optimal: Sub-optimal concentration (&lt;30ng/microlitre);

Note: Sub-optimal purity could lead to failed labeling reaction and sub-optimal concentration can lead to sub-optimal yields of labeled samples.

Assay Class: Eukaryote Total RNA Nano  
Comparison: C:\...rt\Comparison\ComparisonFile10\_Eukaryote Total RNA Nano.xac

Created: 1/14/2019 4:48:19 PM  
Modified: 1/14/2019 4:48:19 PM

### Electropherogram Summary

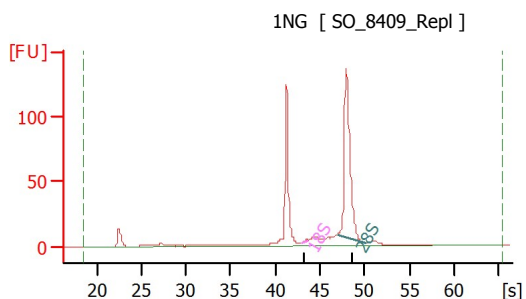

#### Overall Results for sample 1 : 1NG

RNA Area: 440.9  
RNA Concentration: 250 ng/μl  
rRNA Ratio [28s / 18s]: 145.7  
RNA Integrity Number (RIN): 6.8 (B.02.09)  
Result Flagging Color:    
Result Flagging Label: RIN: 6.80

#### Fragment table for sample 1 : 1NG

| Name | Start Time [s] | End Time [s] | Area  | % of total Area |
|------|----------------|--------------|-------|-----------------|
| 18S  | 42.91          | 43.77        | 1.4   | 0.3             |
| 28S  | 46.99          | 50.08        | 199.9 | 45.3            |

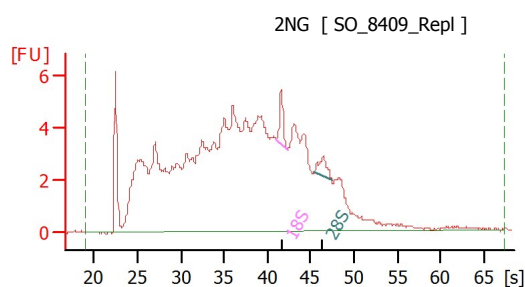

#### Overall Results for sample 2 : 2NG

RNA Area: 225.9  
RNA Concentration: 196 ng/μl  
rRNA Ratio [28s / 18s]: 0.8  
RNA Integrity Number (RIN): 2.9 (B.02.09)  
Result Flagging Color:    
Result Flagging Label: RIN: 2.90

#### Fragment table for sample 2 : 2NG

| Name | Start Time [s] | End Time [s] | Area | % of total Area |
|------|----------------|--------------|------|-----------------|
| 18S  | 41.05          | 42.27        | 2.2  | 1.0             |
| 28S  | 45.39          | 47.44        | 1.7  | 0.7             |

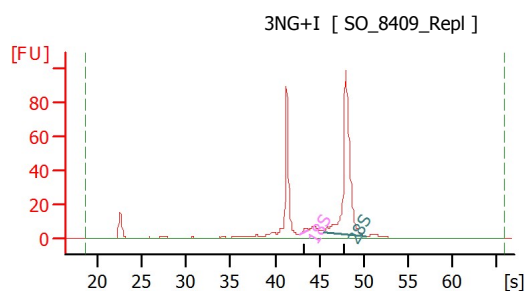

#### Overall Results for sample 3 : 3NG+I

RNA Area: 356.6  
RNA Concentration: 202 ng/μl  
rRNA Ratio [28s / 18s]: 86.1  
RNA Integrity Number (RIN): 6.7 (B.02.09)  
Result Flagging Color:    
Result Flagging Label: RIN: 6.70

#### Fragment table for sample 3 : 3NG+I

| Name | Start Time [s] | End Time [s] | Area  | % of total Area |
|------|----------------|--------------|-------|-----------------|
| 18S  | 42.85          | 43.81        | 1.9   | 0.5             |
| 28S  | 45.48          | 50.16        | 163.4 | 45.8            |

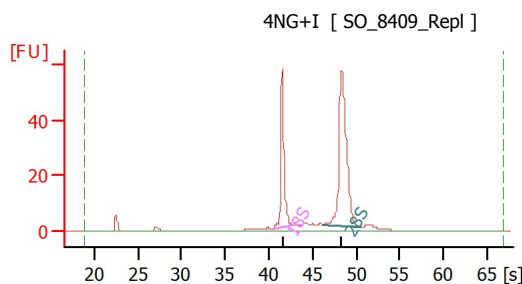

#### Overall Results for sample 4 : 4NG+I

RNA Area: 238.8  
RNA Concentration: 207 ng/μl  
rRNA Ratio [28s / 18s]: 2.0  
RNA Integrity Number (RIN): 9.9 (B.02.09)  
Result Flagging Color:    
Result Flagging Label: RIN: 9.90

#### Fragment table for sample 4 : 4NG+I

| Name | Start Time [s] | End Time [s] | Area  | % of total Area |
|------|----------------|--------------|-------|-----------------|
| 18S  | 40.39          | 42.87        | 57.4  | 24.1            |
| 28S  | 46.26          | 50.48        | 113.9 | 47.7            |

Assay Class: Eukaryote Total RNA Nano  
Comparison: C:\...rt\Comparison\ComparisonFile10\_Eukaryote Total RNA Nano.xac

Created: 1/14/2019 4:48:19 PM  
Modified: 1/14/2019 4:48:19 PM

**Electropherogram Summary Continued ...**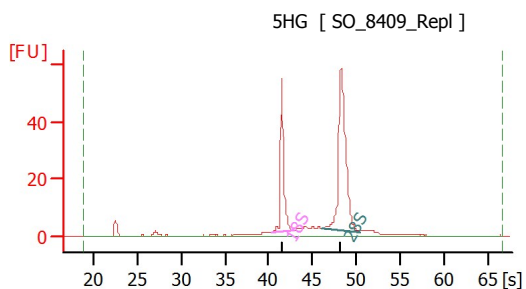**Overall Results for sample 5 : 5HG**

RNA Area: 238.6  
RNA Concentration: 207 ng/μl  
rRNA Ratio [28s / 18s]: 2.0  
RNA Integrity Number (RIN): 9.9 (B.02.09)  
Result Flagging Color:    
Result Flagging Label: RIN: 9.90

**Fragment table for sample 5 : 5HG**

| Name | Start Time [s] | End Time [s] | Area  | % of total Area |
|------|----------------|--------------|-------|-----------------|
| 18S  | 40.40          | 42.82        | 54.9  | 23.0            |
| 28S  | 46.16          | 50.47        | 109.3 | 45.8            |

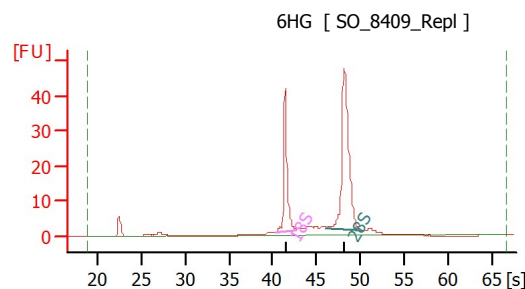**Overall Results for sample 6 : 6HG**

RNA Area: 187.2  
RNA Concentration: 162 ng/μl  
rRNA Ratio [28s / 18s]: 2.1  
RNA Integrity Number (RIN): 10 (B.02.09)  
Result Flagging Color:    
Result Flagging Label: RIN: 10

**Fragment table for sample 6 : 6HG**

| Name | Start Time [s] | End Time [s] | Area | % of total Area |
|------|----------------|--------------|------|-----------------|
| 18S  | 40.31          | 42.73        | 41.8 | 22.3            |
| 28S  | 46.21          | 50.23        | 87.8 | 46.9            |

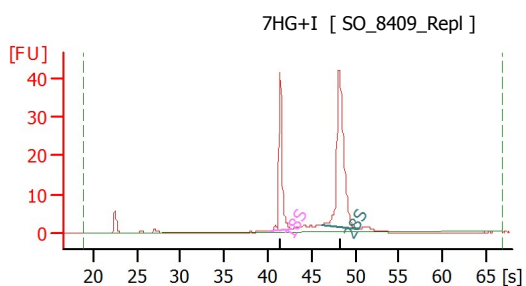**Overall Results for sample 7 : 7HG+I**

RNA Area: 157.0  
RNA Concentration: 136 ng/μl  
rRNA Ratio [28s / 18s]: 2.0  
RNA Integrity Number (RIN): 9.9 (B.02.09)  
Result Flagging Color:    
Result Flagging Label: RIN: 9.90

**Fragment table for sample 7 : 7HG+I**

| Name | Start Time [s] | End Time [s] | Area | % of total Area |
|------|----------------|--------------|------|-----------------|
| 18S  | 40.30          | 42.72        | 38.4 | 24.5            |
| 28S  | 46.16          | 50.29        | 76.7 | 48.8            |

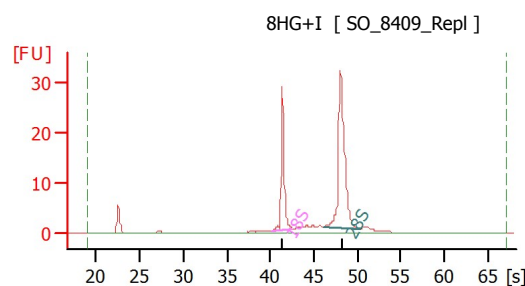**Overall Results for sample 8 : 8HG+I**

RNA Area: 111.6  
RNA Concentration: 97 ng/μl  
rRNA Ratio [28s / 18s]: 2.1  
RNA Integrity Number (RIN): 10 (B.02.09)  
Result Flagging Color:    
Result Flagging Label: RIN: 10

**Fragment table for sample 8 : 8HG+I**

| Name | Start Time [s] | End Time [s] | Area | % of total Area |
|------|----------------|--------------|------|-----------------|
| 18S  | 40.18          | 42.56        | 25.5 | 22.9            |
| 28S  | 46.07          | 50.31        | 54.6 | 49.0            |

Assay Class: Eukaryote Total RNA Nano  
Comparison: C:\...rt\Comparison\ComparisonFile10\_Eukaryote Total RNA Nano.xac

Created: 1/14/2019 4:48:19 PM  
Modified: 1/14/2019 4:48:19 PM

**Electropherogram Summary Continued ...**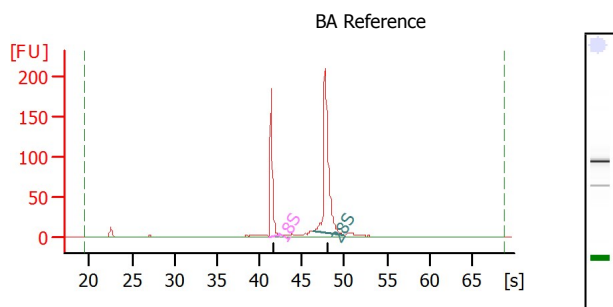**Overall Results for sample 9 : BA Reference**

RNA Area: 533.0  
RNA Concentration: 489 ng/μl  
rRNA Ratio [28s / 18s]: 1.9  
RNA Integrity Number (RIN): 10 (B.02.08)  
Result Flagging Color:    
Result Flagging Label: RIN:10

**Fragment table for sample 9 : BA Reference**

| Name | Start Time [s] | End Time [s] | Area  | % of total Area |
|------|----------------|--------------|-------|-----------------|
| 18S  | 41.06          | 42.31        | 140.5 | 26.4            |
| 28S  | 46.35          | 49.89        | 269.8 | 50.6            |

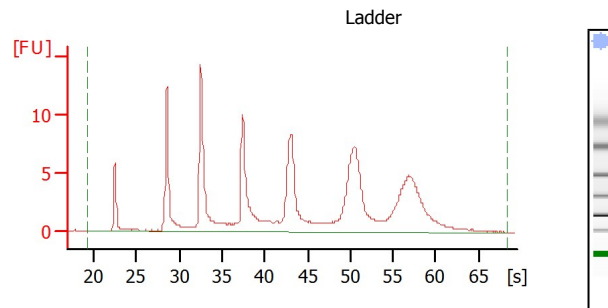**Overall Results for sample 10 : Ladder**

RNA Area: 173.2  
RNA Concentration: 150 ng/μl  
Result Flagging Color:    
Result Flagging Label: All Other Samples

**Fragment table for sample 10 : Ladder**

| Name | Start Time [s] | End Time [s] | Area | % of total Area |
|------|----------------|--------------|------|-----------------|
| 18S  | 40.18          | 42.56        | 25.5 | 22.9            |
| 28S  | 46.07          | 50.31        | 54.6 | 49.0            |
