# Supplementary material for: Assessing the Link between Diabetic Metabolic Dysregulation and Breast Cancer Progression
Source: Int J Mol Sci. 2023 Jul 23;24(14):11816. doi: 10.3390/ijms241411816 (PMC10380477; doi:10.3390/ijms241411816)
Supplement: Supplementary file 1 [file ijms-24-11816-s001.zip]

Archive with 8 entries (8 files):
- QC_DNA Microarray data.pdf
- Quality Control Report_SO_8409.pdf
- SO_8409_Complete_data_set1.xlsx
- SO_8409_Complete_data_set2.xlsx
- SO_8409_Complete_data_set3.xlsx
- SO_8409_Complete_data_set4.xlsx
- SO_8409_repl_Bioanalyzer Report.pdf
- Table 1S, 2S, 3S and 4S.pdf
