# Supplementary material for: Assessing the Link between Diabetic Metabolic Dysregulation and Breast Cancer Progression
Source: Int J Mol Sci. 2023 Jul 23;24(14):11816. doi: 10.3390/ijms241411816 (PMC10380477; doi:10.3390/ijms241411816)
Supplement: Supplementary file 1 [file ijms-24-11816-s001.zip › SO_8409_Complete_data_set1.xlsx]

## Sheet: Read_Me
Genotypic Technology/(SO_8409)QF/LAB/19
Dr. Shivang
				Expression fold values are provided in terms of log base 2 (Formating of color)
This file contains the fold change for all the spots in the array
Complete Data - Set 1
Experiment Details
Set_1
Slide_Id	Sample_details	Group	Analysis_Plan
257236322271_1_1	NG_1	NG	Control
257236322271_1_2	NG_2
257236322271_1_3	NG+I_1	NG+I	Test
257236322271_1_4	NG+I_2
Column Header	Description
GeneName	Unique Gene ID
Fold_NG_1	Fold change calculated as log base 2
Flag_NG_1	Detected/ Compromised
Fold_NG_2	Fold change calculated as log base 2
Flag_NG_2	Detected/ Compromised
GeoMean_NG	Average fold change for the replicate samples
Fold_NG+I_1	Fold change calculated as log base 2
Flag_NG+I_1	Detected/ Compromised
Fold_NG+I_2	Fold change calculated as log base 2
Flag_NG+I_2	Detected/ Compromised
GeoMean_NG+I	Average fold change for the replicate samples
P_Value_NG+I	Student t-test p value
gProcessed_Signal_NG_1	Background subtracted signal intensity
gProcessed_Signal_NG_2	Background subtracted signal intensity
gProcessed_Signal_NG+I_1	Background subtracted signal intensity
gProcessed_Signal_NG+I_2	Background subtracted signal intensity
SystematicName	SystematicName
Description_I	Description_I
Description_II	Description_II
Accessions	Accessions
Gene Ontology	Gene Ontology
Molecular Function	Molecular Function
Cellular Component	Cellular Component
Biological Process	Biological Process
TIGRID	TIGRID
EnsemblID	EnsemblID
UniGeneID	UniGeneID
EntrezGeneID	EntrezGeneID

## Sheet: Complete_Data
	Control_NG					Test_NG+I
GeneName	Fold_NG_1	Flag_NG_1	Fold_NG_2	Flag_NG_2	GeoMean_NG	Fold_NG+I_1	Flag_NG+I_1	Fold_NG+I_2	Flag_NG+I_2	GeoMean_NG+I	P_Value_NG+I	gProcessed_Signal_NG_1	gProcessed_Signal_NG_2	gProcessed_Signal_NG+I_1	gProcessed_Signal_NG+I_2	SystematicName	Description_I	Description_II	Accessions	Gene Ontology	Molecular Function	Cellular Component	Biological Process	TIGRID	EnsemblID	UniGeneID	EntrezGeneID
MARCH1	0.00540519	Detected	-0.00540519	Detected	0	-0.132483	Detected	-0.264943	Detected	-0.198713	0.0959935	373.818	365.65	322.51	253.791	NM_017923	ref|Homo sapiens membrane-associated ring finger (C3HC4) 1, E3 ubiquitin protein ligase (MARCH1), transcript variant 2, mRNA [NM_017923]	membrane-associated ring finger (C3HC4) 1, E3 ubiquitin protein ligase	ref|NM_017923|ref|NM_001166373|ens|ENST00000339875|ens|ENST00000503008	GO:0042287|GO:0000209|GO:0004842|GO:0002495|GO:0005886|GO:0016874|GO:0005765|GO:0032588|GO:0005764|GO:0006955|GO:0031901|GO:0031902|GO:0005789|GO:0008270|GO:0016021|GO:0030659|GO:0005768	GO:0008270=zinc ion binding|GO:0042287=MHC protein binding|GO:0004842=ubiquitin-protein transferase activity|GO:0016874=ligase activity	GO:0005886=plasma membrane|GO:0005765=lysosomal membrane|GO:0005764=lysosome|GO:0031901=early endosome membrane|GO:0005789=endoplasmic reticulum membrane|GO:0031902=late endosome membrane|GO:0030659=cytoplasmic vesicle membrane|GO:0005768=endosome|GO:0016021=integral component of membrane|GO:0032588=trans-Golgi network membrane	GO:0000209=protein polyubiquitination|GO:0002495=antigen processing and presentation of peptide antigen via MHC class II|GO:0006955=immune response	THC2483811	ENST00000339875	Hs.592804	55016
Sep1	-0.0439148	Compromised	0.0439153	Compromised	2.375e-07	-0.129278	Compromised	0.166428	Compromised	0.0185747	0.915151	1.9	1.99	1.7	1.8	NM_052838	ref|Homo sapiens septin 1 (SEPT1), mRNA [NM_052838]	septin 1	ref|NM_052838|ens|ENST00000566517|ens|ENST00000573615|ens|ENST00000572252	GO:0005515|GO:0007049|GO:0005737|GO:0005815|GO:0030496|GO:0005525|GO:0051301	GO:0005525=GTP binding|GO:0005515=protein binding	GO:0005815=microtubule organizing center|GO:0005737=cytoplasm|GO:0030496=midbody	GO:0051301=cell division|GO:0007049=cell cycle	NP1180451	ENST00000566517	Hs.632176	1731
Dec1	-0.298854	Compromised	0.298854	Compromised	0	-1.31797	Compromised	-0.18199	Compromised	-0.749979	0.363032	3.48	5.19	1.63	3.09	NM_017418	ref|Homo sapiens deleted in esophageal cancer 1 (DEC1), mRNA [NM_017418]	deleted in esophageal cancer 1	ref|NM_017418|ens|ENST00000374016|gb|BC107103|gb|AB022761	GO:0008285			GO:0008285=negative regulation of cell proliferation	THC2483720	ENST00000374016	Hs.148841	50514
MARCH2	0.00194168	Detected	-0.00194168	Detected	0	-0.105337	Detected	0.718228	Detected	0.306446	0.534322	41.0513	40.3476	36.1763	55.2268	NM_016496	ref|Homo sapiens membrane-associated ring finger (C3HC4) 2, E3 ubiquitin protein ligase (MARCH2), transcript variant 1, mRNA [NM_016496]	mitochondrial amidoxime reducing component 2	ref|NM_016496|ref|NM_001005415|ref|NM_001005416|ens|ENST00000381035	GO:0005739|GO:0043546|GO:0051410|GO:0042126|GO:0030170|GO:0008940|GO:0005743|GO:0005741|GO:0070062|GO:0055114|GO:0030151|GO:0005777	GO:0030170=pyridoxal phosphate binding|GO:0030151=molybdenum ion binding|GO:0008940=nitrate reductase activity|GO:0043546=molybdopterin cofactor binding	GO:0005777=peroxisome|GO:0070062=extracellular exosome|GO:0005739=mitochondrion|GO:0005741=mitochondrial outer membrane|GO:0005743=mitochondrial inner membrane	GO:0051410=detoxification of nitrogen compound|GO:0055114=oxidation-reduction process|GO:0042126=nitrate metabolic process	NP303386	ENST00000472447	Hs.369042	54996
SEPT2	0.00604153	Detected	-0.00604153	Detected	0	-0.230918	Detected	-0.198619	Detected	-0.214769	0.00638378	230.613	225.376	185.757	163.861	NM_001008491	ref|Homo sapiens septin 2 (SEPT2), transcript variant 1, mRNA [NM_001008491]	septin 2	ref|NM_001008491|ref|NM_001282973|ref|NM_006155|ref|NM_001282972	GO:0005515|GO:0060170|GO:0048471|GO:0045202|GO:0005634|GO:0015629|GO:0032154|GO:0031175|GO:0007224|GO:0032880|GO:0005737|GO:0000145|GO:0035869|GO:0030234|GO:0005938|GO:0070062|GO:0005819|GO:0005730|GO:0030496|GO:0002036|GO:0005525|GO:0042384|GO:0007067|GO:0032947|GO:0050790|GO:0000777|GO:0005654|GO:0051301	GO:0005525=GTP binding|GO:0032947=protein complex scaffold|GO:0005515=protein binding|GO:0030234=enzyme regulator activity	GO:0032154=cleavage furrow|GO:0000777=condensed chromosome kinetochore|GO:0045202=synapse|GO:0005730=nucleolus|GO:0005654=nucleoplasm|GO:0070062=extracellular exosome|GO:0015629=actin cytoskeleton|GO:0060170=ciliary membrane|GO:0000145=exocyst|GO:0005634=nucleus|GO:0048471=perinuclear region of cytoplasm|GO:0005737=cytoplasm|GO:0005938=cell cortex|GO:0005819=spindle|GO:0035869=ciliary transition …	GO:0051301=cell division|GO:0042384=cilium assembly|GO:0050790=regulation of catalytic activity|GO:0031175=neuron projection development|GO:0032880=regulation of protein localization|GO:0007224=smoothened signaling pathway|GO:0007067=mitotic nuclear division|GO:0002036=regulation of L-glutamate transport	THC2465756	ENST00000391973	Hs.721234	4735
MARCH3	-0.0570855	Detected	0.0570855	Detected	0	0.0474834	Detected	-0.536567	Detected	-0.244542	0.49755	63	67.2	64.3	37	NM_178450	ref|Homo sapiens membrane-associated ring finger (C3HC4) 3, E3 ubiquitin protein ligase (MARCH3), mRNA [NM_178450]	membrane-associated ring finger (C3HC4) 3, E3 ubiquitin protein ligase	ref|NM_178450|ens|ENST00000308660|gb|AK000103|tc|THC2613510	GO:0016567|GO:0031901|GO:0016874|GO:0008270|GO:0016021|GO:0005764|GO:0030659|GO:0006897|GO:0005768	GO:0008270=zinc ion binding|GO:0016874=ligase activity	GO:0031901=early endosome membrane|GO:0030659=cytoplasmic vesicle membrane|GO:0005768=endosome|GO:0016021=integral component of membrane|GO:0005764=lysosome	GO:0006897=endocytosis|GO:0016567=protein ubiquitination	THC2464429	ENST00000506088	Hs.132441	115123
SEPT3	0.547605	Detected	-0.547605	Compromised	0	-1.12462	Compromised	-0.421035	Compromised	-0.77283	0.356985	8.74	4.03163	2.60323	3.65697	NM_145733	ref|Homo sapiens septin 3 (SEPT3), transcript variant A, mRNA [NM_145733]	septin 3	ref|NM_145733|ens|ENST00000396426|gb|AB463248|gb|CU013459	GO:0003674|GO:0007049|GO:0005737|GO:0030054|GO:0045202|GO:0005856|GO:0005525|GO:0051301	GO:0005525=GTP binding|GO:0003674=molecular_function	GO:0005856=cytoskeleton|GO:0005737=cytoplasm|GO:0030054=cell junction|GO:0045202=synapse	GO:0051301=cell division|GO:0007049=cell cycle	THC2745156	ENST00000396426	Hs.120483	55964
MARCH4	-0.0217147	Compromised	0.0217147	Compromised	0	-0.0803647	Compromised	0.21305	Compromised	0.0663426	0.698413	1.92	1.95	1.75	1.85	NM_020814	ref|Homo sapiens membrane-associated ring finger (C3HC4) 4, E3 ubiquitin protein ligase (MARCH4), mRNA [NM_020814]	membrane-associated ring finger (C3HC4) 4, E3 ubiquitin protein ligase	ref|NM_020814|ens|ENST00000273067|gb|AB037820|gb|BC048793	GO:0005802|GO:0004842|GO:0016567|GO:0005795|GO:0000139|GO:0016874|GO:0008270|GO:0016021	GO:0004842=ubiquitin-protein transferase activity|GO:0008270=zinc ion binding|GO:0016874=ligase activity	GO:0005802=trans-Golgi network|GO:0016021=integral component of membrane|GO:0000139=Golgi membrane|GO:0005795=Golgi stack	GO:0016567=protein ubiquitination	THC2606222	ENST00000273067	Hs.170388	57574
SEPT4	0.0773001	Compromised	-0.0773001	Compromised	0	0.243602	Compromised	-0.0811195	Compromised	0.0812411	0.695691	5.67	5.02	6.04	4.16	NM_004574	ref|Homo sapiens septin 4 (SEPT4), transcript variant 1, mRNA [NM_004574]	septin 4	ref|NM_004574|ref|NM_001256782|ref|NM_001256822|ref|NM_001198713	GO:0005515|GO:0043065|GO:0097227|GO:0003924|GO:0006915|GO:2001244|GO:0042981|GO:0005634|GO:0005525|GO:0030382|GO:0005739|GO:0007049|GO:0005198|GO:0007420|GO:0008152|GO:0031398|GO:0005856|GO:0048240|GO:0051301	GO:0005198=structural molecule activity|GO:0005525=GTP binding|GO:0005515=protein binding|GO:0003924=GTPase activity	GO:0005634=nucleus|GO:0005856=cytoskeleton|GO:0097227=sperm annulus|GO:0005739=mitochondrion	GO:0030382=sperm mitochondrion organization|GO:0008152=metabolic process|GO:0042981=regulation of apoptotic process|GO:0007420=brain development|GO:0007049=cell cycle|GO:0051301=cell division|GO:0048240=sperm capacitation|GO:0043065=positive regulation of apoptotic process|GO:0006915=apoptotic process|GO:0031398=positive regulation of protein ubiquitination|GO:2001244=positive regulation of intri…	THC2659794	ENST00000412945	Hs.287518	5414
MARCH5	-0.0514278	Detected	0.0514278	Detected	0	-0.0440135	Detected	-0.330123	Detected	-0.187068	0.343574	240	254	229	162	NM_017824	ref|Homo sapiens membrane-associated ring finger (C3HC4) 5 (MARCH5), mRNA [NM_017824]	membrane-associated ring finger (C3HC4) 5	ref|NM_017824|ens|ENST00000358935|ref|XM_005269923|gb|BC015480	GO:0000209|GO:0005515|GO:0004842|GO:0005783|GO:0016874|GO:0090344|GO:0005741|GO:0090141|GO:0090140|GO:0051865|GO:0051020|GO:0016020|GO:0070585|GO:0005789|GO:0008270|GO:0016021	GO:0008270=zinc ion binding|GO:0004842=ubiquitin-protein transferase activity|GO:0005515=protein binding|GO:0051020=GTPase binding|GO:0016874=ligase activity	GO:0005783=endoplasmic reticulum|GO:0005741=mitochondrial outer membrane|GO:0005789=endoplasmic reticulum membrane|GO:0016020=membrane|GO:0016021=integral component of membrane	GO:0090344=negative regulation of cell aging|GO:0000209=protein polyubiquitination|GO:0090140=regulation of mitochondrial fission|GO:0090141=positive regulation of mitochondrial fission|GO:0070585=protein localization to mitochondrion|GO:0051865=protein autoubiquitination	THC2641973	ENST00000358935	Hs.573490	54708
SEPT5	-0.682795	Compromised	0.682795	Compromised	0	-1.05688	Compromised	0.0158339	Compromised	-0.520523	0.609711	2.28	5.79	1.67	3.03	NM_001009939	ref|Homo sapiens septin 5 (SEPT5), transcript variant 2, mRNA [NM_001009939]	septin 5	ref|NM_001009939|ref|NM_002688|ens|ENST00000406172|ens|ENST00000383045	GO:0005515|GO:0016080|GO:0005886|GO:2000300|GO:0003924|GO:0005525|GO:0008021|GO:0000910|GO:0005198|GO:0043195|GO:0008152|GO:0017157|GO:0005856|GO:0005938	GO:0005198=structural molecule activity|GO:0005525=GTP binding|GO:0005515=protein binding|GO:0003924=GTPase activity	GO:0008021=synaptic vesicle|GO:0005886=plasma membrane|GO:0005856=cytoskeleton|GO:0043195=terminal bouton|GO:0005938=cell cortex	GO:0008152=metabolic process|GO:0000910=cytokinesis|GO:0016080=synaptic vesicle targeting|GO:2000300=regulation of synaptic vesicle exocytosis|GO:0017157=regulation of exocytosis	THC2503766	ENST00000406172	Hs.728762	5413
MARCH6	-0.0213263	Detected	0.0213263	Detected	0	0.0843308	Detected	0.17326	Detected	0.128796	0.120643	623.014	632.408	636.35	583.813	NM_005885	ref|Homo sapiens membrane-associated ring finger (C3HC4) 6, E3 ubiquitin protein ligase (MARCH6), transcript variant 1, mRNA [NM_005885]	membrane-associated ring finger (C3HC4) 6, E3 ubiquitin protein ligase	ref|NM_005885|ref|NM_001270660|ref|NM_001270661|ens|ENST00000274140	GO:0004842|GO:0016020|GO:0016874|GO:0030176|GO:0008270|GO:0070936|GO:0019899|GO:0031624	GO:0004842=ubiquitin-protein transferase activity|GO:0008270=zinc ion binding|GO:0031624=ubiquitin conjugating enzyme binding|GO:0016874=ligase activity|GO:0019899=enzyme binding	GO:0016020=membrane|GO:0030176=integral component of endoplasmic reticulum membrane	GO:0070936=protein K48-linked ubiquitination	THC2468759	ENST00000274140	Hs.432862	10299
SEPT6	0.118033	Detected	-0.118033	Detected	0	-0.235946	Detected	-1.18631	Compromised	-0.711127	0.283537	11.7	9.79	8.69	3.87918	NM_145802	ref|Homo sapiens septin 6 (SEPT6), transcript variant V, mRNA [NM_145802]	septin 6	ref|NM_145802|ref|NM_145800|ens|ENST00000460411|ens|ENST00000354228	GO:0005515|GO:0000910|GO:0005819|GO:0000777|GO:0030496|GO:0016032|GO:0043679|GO:0005525|GO:0032154|GO:0008021	GO:0005525=GTP binding|GO:0005515=protein binding	GO:0032154=cleavage furrow|GO:0008021=synaptic vesicle|GO:0005819=spindle|GO:0000777=condensed chromosome kinetochore|GO:0030496=midbody|GO:0043679=axon terminus	GO:0016032=viral process|GO:0000910=cytokinesis	NP391544	ENST00000354228	Hs.496666	23157
MARCH7	-0.0380013	Detected	0.0380013	Detected	0	0.0477278	Detected	-0.386197	Detected	-0.169235	0.522617	541	562	545	348	NM_022826	ref|Homo sapiens membrane-associated ring finger (C3HC4) 7, E3 ubiquitin protein ligase (MARCH7), transcript variant 2, mRNA [NM_022826]	membrane-associated ring finger (C3HC4) 7, E3 ubiquitin protein ligase	ref|NM_022826|ref|NM_001282805|ref|NM_001282807|ref|NM_001282806	GO:0016567|GO:0016874|GO:0008270	GO:0008270=zinc ion binding|GO:0016874=ligase activity		GO:0016567=protein ubiquitination	THC2462640	ENST00000409175	Hs.529272	64844
SEPT7	-0.0373642	Detected	0.0373642	Detected	0	-0.059303	Detected	-0.304655	Detected	-0.181979	0.291687	886.255	919.844	828.604	602.97	NM_001011553	ref|Homo sapiens septin 7 (SEPT7), transcript variant 2, mRNA [NM_001011553]	septin 7	ref|NM_001011553|ref|NM_001788|ref|NM_001242956|ref|NR_027269	GO:0005515|GO:0005886|GO:0045202|GO:0005634|GO:0015629|GO:0032154|GO:0051291|GO:0042802|GO:0000910|GO:0005737|GO:0016324|GO:0015630|GO:0043679|GO:0005938|GO:0070062|GO:0001725|GO:0005930|GO:0005819|GO:0005730|GO:0030496|GO:0005525|GO:0007067|GO:0005198|GO:0016476|GO:0060271|GO:0000777	GO:0005198=structural molecule activity|GO:0005525=GTP binding|GO:0042802=identical protein binding|GO:0005515=protein binding	GO:0015630=microtubule cytoskeleton|GO:0032154=cleavage furrow|GO:0000777=condensed chromosome kinetochore|GO:0045202=synapse|GO:0005730=nucleolus|GO:0005930=axoneme|GO:0070062=extracellular exosome|GO:0001725=stress fiber|GO:0015629=actin cytoskeleton|GO:0005886=plasma membrane|GO:0043679=axon terminus|GO:0005634=nucleus|GO:0005737=cytoplasm|GO:0005938=cell cortex|GO:0005819=spindle|GO:0030496=m…	GO:0000910=cytokinesis|GO:0051291=protein heterooligomerization|GO:0016476=regulation of embryonic cell shape|GO:0060271=cilium morphogenesis|GO:0007067=mitotic nuclear division	THC2554020	ENST00000425198	Hs.191346	989
MARCH8	0.0761266	Detected	-0.0761266	Detected	0	0.0234413	Detected	0.655985	Detected	0.339713	0.405975	29.577	26.229	27.0699	36.2	NM_001282866	ref|Homo sapiens membrane-associated ring finger (C3HC4) 8, E3 ubiquitin protein ligase (MARCH8), transcript variant 4, mRNA [NM_001282866]	membrane-associated ring finger (C3HC4) 8, E3 ubiquitin protein ligase	ref|NM_001282866|ref|NM_145021|ref|NM_001002266|ens|ENST00000476962	GO:0000209|GO:0004842|GO:0042289|GO:0002495|GO:0016874|GO:0005765|GO:0005764|GO:0031901|GO:0045347|GO:0008270|GO:0016021|GO:0030659|GO:0005768	GO:0008270=zinc ion binding|GO:0042289=MHC class II protein binding|GO:0004842=ubiquitin-protein transferase activity|GO:0016874=ligase activity	GO:0005765=lysosomal membrane|GO:0005764=lysosome|GO:0031901=early endosome membrane|GO:0030659=cytoplasmic vesicle membrane|GO:0005768=endosome|GO:0016021=integral component of membrane	GO:0000209=protein polyubiquitination|GO:0045347=negative regulation of MHC class II biosynthetic process|GO:0002495=antigen processing and presentation of peptide antigen via MHC class II	THC2471858	ENST00000451376	Hs.499489	220972
SEPT8	-0.656005	Detected	0.656005	Detected	0	-0.687861	Detected	-0.703409	Detected	-0.695635	0.400117	58.8133	143.91	54.6108	46.6021	NM_001098811	ref|Homo sapiens septin 8 (SEPT8), transcript variant 1, mRNA [NM_001098811]	septin 8	ref|NM_001098811|ens|ENST00000378719|ref|XM_005271931|ref|XM_005271927	GO:0005515|GO:0007049|GO:0005737|GO:0005856|GO:0005525	GO:0005525=GTP binding|GO:0005515=protein binding	GO:0005856=cytoskeleton|GO:0005737=cytoplasm	GO:0007049=cell cycle	THC2530391	ENST00000378719	Hs.522057	23176
MARCH9	-0.0105307	Detected	0.0105307	Detected	0	-0.0343959	Detected	-0.0322058	Detected	-0.0333009	0.0879513	1810	1810	1690	1460	NM_138396	ref|Homo sapiens membrane-associated ring finger (C3HC4) 9 (MARCH9), mRNA [NM_138396]	membrane-associated ring finger (C3HC4) 9	ref|NM_138396|ens|ENST00000548358|ens|ENST00000266643|gb|BC036455	GO:0005802|GO:0016567|GO:0005795|GO:0000139|GO:0016874|GO:0008270|GO:0016021|GO:0005765	GO:0008270=zinc ion binding|GO:0016874=ligase activity	GO:0005802=trans-Golgi network|GO:0016021=integral component of membrane|GO:0000139=Golgi membrane|GO:0005795=Golgi stack|GO:0005765=lysosomal membrane	GO:0016567=protein ubiquitination	THC2478012	ENST00000548358	Hs.632709	92979
SEPT9	-0.00805664	Detected	0.00805616	Detected	-2.385e-07	-0.0875392	Detected	-0.111413	Detected	-0.0994761	0.020322	2341.9	2333.88	2103.94	1785.06	NM_006640	ref|Homo sapiens septin 9 (SEPT9), transcript variant 3, mRNA [NM_006640]	septin 9	ref|NM_006640|ref|NM_001113492|ref|NM_001113493|ref|NM_001113494	GO:0005515|GO:0048471|GO:0007049|GO:0005737|GO:0001725|GO:0008152|GO:0005874|GO:0003924|GO:0015629|GO:0005525|GO:0051291|GO:0051301	GO:0005525=GTP binding|GO:0005515=protein binding|GO:0003924=GTPase activity	GO:0048471=perinuclear region of cytoplasm|GO:0005737=cytoplasm|GO:0001725=stress fiber|GO:0015629=actin cytoskeleton|GO:0005874=microtubule	GO:0051301=cell division|GO:0008152=metabolic process|GO:0051291=protein heterooligomerization|GO:0007049=cell cycle	THC2569011	ENST00000329047	Hs.440932	10801
MARCH10	0.305097	Compromised	-0.305097	Compromised	0	0.862006	Compromised	0.0310817	Compromised	0.446544	0.477642	2.85	1.84	3.98	1.93	NM_152598	ref|Homo sapiens membrane-associated ring finger (C3HC4) 10, E3 ubiquitin protein ligase (MARCH10), transcript variant 1, mRNA [NM_152598]	membrane-associated ring finger (C3HC4) 10, E3 ubiquitin protein ligase	ref|NM_152598|ref|NM_001100875|ref|NM_001288779|ens|ENST00000311269	GO:0016567|GO:0016874|GO:0008270	GO:0008270=zinc ion binding|GO:0016874=ligase activity		GO:0016567=protein ubiquitination	NP1159821	ENST00000311269	Hs.665663	162333
SEPT10	-0.0049603	Detected	0.0049603	Detected	0	-0.388459	Detected	-0.636745	Detected	-0.512602	0.0540288	1300	1290	946	687	NM_144710	ref|Homo sapiens septin 10 (SEPT10), transcript variant 1, mRNA [NM_144710]	septin 10	ref|NM_144710|ref|NM_178584|ref|NR_047585|ens|ENST00000397712	GO:0007049|GO:0005737|GO:0005856|GO:0005525|GO:0051301	GO:0005525=GTP binding	GO:0005856=cytoskeleton|GO:0005737=cytoplasm	GO:0051301=cell division|GO:0007049=cell cycle	NP1467265	ENST00000397712	Hs.469615	151011
MARCH11	0.328985	Compromised	-0.328985	Compromised	0	-0.471982	Compromised	-0.140556	Compromised	-0.306269	0.493188	3.01	1.88	1.64	1.78	NM_001102562	ref|Homo sapiens membrane-associated ring finger (C3HC4) 11 (MARCH11), mRNA [NM_001102562]	membrane-associated ring finger (C3HC4) 11	ref|NM_001102562|ens|ENST00000332432|gb|BC150514|gb|BC150513	GO:0016567|GO:0016874|GO:0008270|GO:0016021|GO:0030659	GO:0008270=zinc ion binding|GO:0016874=ligase activity	GO:0030659=cytoplasmic vesicle membrane|GO:0016021=integral component of membrane	GO:0016567=protein ubiquitination	THC2754016	ENST00000332432	Hs.662216	441061
SEPT11	-0.0124989	Detected	0.0124993	Detected	2.38e-07	0.109146	Detected	-0.105427	Detected	0.00185942	0.98783	3660	3670	3780	2810	NM_018243	ref|Homo sapiens septin 11 (SEPT11), mRNA [NM_018243]	septin 11	ref|NM_018243|ens|ENST00000264893|ref|XM_005263120|ref|XM_006714259	GO:0005515|GO:0030424|GO:0007049|GO:0005737|GO:0001725|GO:0030054|GO:0043197|GO:0045202|GO:0005525|GO:0051291|GO:0070062|GO:0051301	GO:0005525=GTP binding|GO:0005515=protein binding	GO:0070062=extracellular exosome|GO:0005737=cytoplasm|GO:0001725=stress fiber|GO:0043197=dendritic spine|GO:0030054=cell junction|GO:0045202=synapse|GO:0030424=axon	GO:0051301=cell division|GO:0051291=protein heterooligomerization|GO:0007049=cell cycle	THC2545449	ENST00000264893	Hs.128199	55752
SEPT12	-0.205168	Detected	0.205168	Detected	1.2e-07	0.791222	Detected	-0.112023	Detected	0.339599	0.564273	11.3	14.8	21.4	9.87	NM_144605	ref|Homo sapiens septin 12 (SEPT12), transcript variant 2, mRNA [NM_144605]	septin 12	ref|NM_144605|ref|NM_001154458|ens|ENST00000587603|ens|ENST00000268231	GO:0005515|GO:0031105|GO:0001725|GO:0048471|GO:0097227|GO:0005819|GO:0030496|GO:0005525|GO:0032154|GO:0042803|GO:0007049|GO:0015630|GO:0019003|GO:0035091|GO:0051301	GO:0042803=protein homodimerization activity|GO:0035091=phosphatidylinositol binding|GO:0005525=GTP binding|GO:0005515=protein binding|GO:0019003=GDP binding	GO:0015630=microtubule cytoskeleton|GO:0032154=cleavage furrow|GO:0048471=perinuclear region of cytoplasm|GO:0097227=sperm annulus|GO:0001725=stress fiber|GO:0005819=spindle|GO:0030496=midbody|GO:0031105=septin complex	GO:0007049=cell cycle|GO:0051301=cell division	NP1153851	ENST00000587603	Hs.126780	124404
SEPT14	0.00154805	Detected	-0.00154805	Detected	0	-0.0859168	Detected	-0.133686	Detected	-0.109801	0.0443769	53.173	52.2901	47.5066	39.6444	NM_207366	ref|Homo sapiens septin 14 (SEPT14), mRNA [NM_207366]	septin 14	ref|NM_207366|ens|ENST00000388975|gb|AK126048|tc|THC2479910	GO:0005515|GO:0007049|GO:0005737|GO:0005856|GO:0005525|GO:0051301	GO:0005525=GTP binding|GO:0005515=protein binding	GO:0005856=cytoskeleton|GO:0005737=cytoplasm	GO:0051301=cell division|GO:0007049=cell cycle	THC2546252	ENST00000413839	Hs.453629	346288
SEPT15	0.000564575	Detected	-0.000565052	Detected	-2.38415e-07	0.0881791	Detected	0.203644	Detected	0.145911	0.127339	4992.88	4916.66	5036.37	4706.34	NM_004261	ref|Homo sapiens 15 kDa selenoprotein (SEP15), transcript variant 1, mRNA [NM_004261]	15 kDa selenoprotein	ref|NM_004261|ref|NM_203341|ens|ENST00000616787|ens|ENST00000611507	GO:0008430|GO:0051084|GO:0005788|GO:0070062	GO:0008430=selenium binding	GO:0005788=endoplasmic reticulum lumen|GO:0070062=extracellular exosome	GO:0051084='de novo' posttranslational protein folding	THC2470152	ENST00000616787	Hs.362728	9403
A_19_P00325768	0.0113297	Detected	-0.0113301	Detected	-2.385e-07	-0.116161	Detected	-0.0908499	Detected	-0.103505	0.0258904	6030	5850	5240	4600	A_19_P00325768	Unknown
A_19_P00800244	-0.139393	Detected	0.139393	Detected	0	-0.0484815	Detected	-0.0419908	Detected	-0.0452361	0.776399	36.3	43.4	36.7	31.8	A_19_P00800244	Unknown
A_19_P00802027	0.0500622	Detected	-0.0500622	Detected	0	-0.15023	Detected	0.0181885	Detected	-0.066021	0.569818	63300	58200	52300	50700	A_19_P00802027	Unknown
A_19_P00803499	-0.00521994	Detected	0.00521994	Detected	0	-0.320674	Detected	-0.522467	Detected	-0.421571	0.052917	40.9	40.6	31.2	23.4	A_19_P00803499	Unknown
A_19_P00803675	-0.0489092	Compromised	0.0489092	Compromised	0	-0.0716553	Compromised	0.215589	Compromised	0.0719669	0.682005	1.83	1.93	1.71	1.8	A_19_P00803675	Unknown
A_19_P00804070	0.0839429	Compromised	-0.0839429	Compromised	0	-0.639698	Compromised	-0.535683	Compromised	-0.58769	0.0270912	3.34	2.93	1.92	1.78	A_19_P00804070	Unknown
A_19_P00804120	-0.133611	Compromised	0.133611	Compromised	-2.35e-07	0.477158	Compromised	0.639362	Compromised	0.55826	0.0702291	2.58	3.06	3.74	3.61	A_19_P00804120	Unknown
A_19_P00804924	-0.08286	Compromised	0.0828595	Compromised	-2.37e-07	-0.624054	Compromised	-0.326909	Compromised	-0.475482	0.107715	2.56	2.83	1.67	1.77	A_19_P00804924	Unknown
A_19_P00805651	-0.0244474	Detected	0.024447	Detected	-2.385e-07	0.0459619	Detected	0.476891	Detected	0.261426	0.351259	3080	3140	3070	3570	A_19_P00805651	Unknown
A_19_P00806158	-0.0292683	Detected	0.0292678	Detected	-2.385e-07	-0.0172191	Detected	-0.0970678	Detected	-0.0571434	0.367666	6080	6240	5820	4750	A_19_P00806158	Unknown
A_19_P00808758	0.106523	Detected	-0.106523	Detected	-2.4e-07	0.0560927	Detected	0.00197983	Detected	0.0290363	0.816362	9480	8060	8690	7220	A_19_P00808758	Unknown
A_19_P00808923	0.135993	Detected	-0.135993	Detected	-2.4e-07	-0.285408	Detected	-0.335796	Detected	-0.310602	0.153807	13600	11100	9640	8030	A_19_P00808923	Unknown
A_19_P00811234	-0.0540423	Detected	0.0540423	Detected	0	-0.371725	Detected	-0.188229	Detected	-0.279977	0.119307	193	205	147	144	A_19_P00811234	Unknown
A_19_P00812701	0.0351536	Detected	-0.0351536	Detected	0	-0.30575	Detected	-0.483855	Detected	-0.394803	0.0540805	99.4	93.3	74.5	56.8	A_19_P00812701	Unknown
A_21_P0000465	-0.534547	Compromised	0.534547	Compromised	-2.25e-07	0.938585	Compromised	0.15752	Compromised	0.548053	0.494807	1.92	3.97	5.06	2.54	A_21_P0000465	Unknown
A_21_P0000467	-0.0405912	Compromised	0.0405912	Compromised	0	-0.127761	Compromised	0.168899	Compromised	0.0205686	0.905844	1.88	1.96	1.68	1.78	A_21_P0000467	Unknown
A_21_P0000480	-0.0516443	Detected	0.0516443	Detected	0	-0.0392313	Detected	0.101523	Detected	0.0311458	0.755372	68.2	72.2	65.3	62.1	A_21_P0000480	Unknown
A_21_P0000520	0.0386012	Detected	-0.0386012	Detected	0	-0.189058	Detected	0.281718	Detected	0.0463297	0.863937	48.6	45.4	39.4	47.1	A_21_P0000520	Unknown
A_21_P0000564	-0.347364	Compromised	0.347364	Compromised	0	-0.476009	Compromised	-0.168643	Compromised	-0.322326	0.485482	2.05	3.27	1.78	1.9	A_21_P0000564	Unknown
A_21_P0013913	0.111248	Detected	-0.111248	Detected	0	0.220948	Detected	0.335145	Detected	0.278046	0.156204	20.6	17.4	21.1	19.7	A_21_P0013913	Unknown
A_21_P0013928	-0.243012	Detected	0.243012	Detected	0	0.108607	Detected	0.539443	Detected	0.324025	0.423505	21.3	29.4	25.8	30	A_21_P0013928	Unknown
A_21_P0013937	-0.172748	Detected	0.172748	Detected	0	-0.0272574	Detected	-0.0122166	Detected	-0.019737	0.919549	46	57.6	48.3	42.1	A_21_P0013937	Unknown
A_21_P0013942	0.20309	Compromised	-0.20309	Compromised	0	0.477333	Compromised	0.635081	Compromised	0.556207	0.125249	2.77	2.06	3.18	3.06	A_21_P0013942	Unknown
A_21_P0013943	-0.0510669	Compromised	0.0510664	Compromised	-2.375e-07	-0.0707436	Compromised	0.228915	Compromised	0.0790858	0.666893	1.73	1.83	1.62	1.72	A_21_P0013943	Unknown
A_21_P0013948	-0.298461	Detected	0.298461	Detected	-1.2e-07	0.577499	Detected	-0.0750711	Detected	0.251214	0.627244	15.9	23.7	27.7	15.2	A_21_P0013948	Unknown
A_21_P0013949	0.393147	Compromised	-0.393147	Compromised	0	-0.591294	Compromised	-0.299194	Compromised	-0.445244	0.399651	3.71	2.12	1.78	1.88	A_21_P0013949	Unknown
A_21_P0013954	-0.247066	Compromised	0.247066	Compromised	0	-0.380073	Compromised	-0.0862098	Compromised	-0.233141	0.502506	2.01	2.79	1.74	1.84	A_21_P0013954	Unknown
A_21_P0013957	0.549055	Compromised	-0.549056	Compromised	-2.5e-07	1.06025	Compromised	0.450377	Compromised	0.755316	0.352179	3.91	1.8	5.29	2.99	A_21_P0013957	Unknown
A_21_P0013959	-0.0220113	Compromised	0.0220113	Compromised	0	-0.1101	Compromised	0.178872	Compromised	0.0343859	0.835892	1.87	1.9	1.67	1.76	A_21_P0013959	Unknown
A_21_P0013962	-0.051527	Compromised	0.0515275	Compromised	2.385e-07	-0.07235	Compromised	0.236818	Compromised	0.0822341	0.663903	1.71	1.81	1.6	1.71	A_21_P0013962	Unknown
A_21_P0013972	-0.0565901	Compromised	0.0565896	Compromised	-2.385e-07	-0.0714307	Compromised	0.215814	Compromised	0.0721915	0.686037	1.82	1.94	1.71	1.8	A_21_P0013972	Unknown
A_21_P0013988	0.360787	Compromised	-0.360786	Compromised	2.3e-07	-0.355852	Compromised	0.381337	Compromised	0.0127428	0.982533	8.5	5.08	4.91	7.06	A_21_P0013988	Unknown
A_21_P0013990	0.813637	Detected	-0.813636	Compromised	2.5e-07	-0.167178	Compromised	-0.347647	Compromised	-0.257412	0.782954	12.1	3.86	5.82	4.43	A_21_P0013990	Unknown
A_21_P0013992	-0.893053	Compromised	0.893053	Compromised	2.25e-07	-0.939696	Compromised	-0.647018	Compromised	-0.793357	0.473121	1.73	5.88	1.59	1.68	A_21_P0013992	Unknown
A_21_P0013994	0.21393	Detected	-0.21393	Detected	0	-0.069526	Detected	-1.16539	Detected	-0.617456	0.403984	35.9	26.3	28	11.3	A_21_P0013994	Unknown
A_21_P0013999	0.655072	Detected	-0.655072	Compromised	0	-0.967864	Compromised	-0.879932	Compromised	-0.923898	0.294651	19.5	7.75	6.01	5.51	A_21_P0013999	Unknown
A_21_P0014005	-0.0493221	Compromised	0.0493226	Compromised	2.375e-07	0.432824	Compromised	0.507362	Compromised	0.470093	0.0168575	1.81	1.91	2.4	2.18	A_21_P0014005	Unknown
A_21_P0014013	-0.10451	Detected	0.10451	Detected	0	-0.365012	Detected	-0.0949371	Detected	-0.229975	0.310362	84.8	96.6	67.2	69.9	A_21_P0014013	Unknown
A_21_P0014023	-0.0294085	Detected	0.029408	Detected	-2.385e-07	-0.911238	Detected	0.757573	Detected	-0.0768325	0.935067	2640	2710	1360	3730	A_21_P0014023	Unknown
A_21_P0014027	-0.0495319	Compromised	0.0495319	Compromised	0	-0.0999613	Compromised	0.198172	Compromised	0.0491052	0.78416	1.8	1.9	1.65	1.75	A_21_P0014027	Unknown
A_21_P0014037	-0.246183	Compromised	0.246183	Compromised	0	1.01174	Detected	0.184295	Compromised	0.598017	0.340071	3.96	5.49	8.99	4.37	A_21_P0014037	Unknown
A_21_P0014040	0.0161221	Detected	-0.0161221	Detected	0	0.0770094	Detected	-0.156556	Detected	-0.0397732	0.767952	102	98.3	101	74.1	A_21_P0014040	Unknown
A_21_P0014050	0.514548	Compromised	-0.514548	Compromised	0	-0.649269	Compromised	-0.375271	Compromised	-0.51227	0.437533	4.39	2.12	1.86	1.94	A_21_P0014050	Unknown
A_21_P0014052	-0.0327277	Compromised	0.0327277	Compromised	0	0.122747	Compromised	0.154471	Compromised	0.138609	0.0624649	1.92	1.98	2.03	1.79	A_21_P0014052	Unknown
A_21_P0014064	-0.0487061	Compromised	0.0487061	Compromised	0	-0.104849	Compromised	0.215923	Compromised	0.0555367	0.771892	1.84	1.94	1.68	1.81	A_21_P0014064	Unknown
A_21_P0014068	-0.0573177	Compromised	0.0573177	Compromised	0	-0.058567	Compromised	0.178009	Compromised	0.059721	0.694126	1.94	2.07	1.84	1.87	A_21_P0014068	Unknown
A_21_P0014095	-0.0439148	Compromised	0.0439153	Compromised	2.375e-07	0.704505	Compromised	0.17442	Compromised	0.439463	0.243519	1.9	1.99	3.03	1.81	A_21_P0014095	Unknown
A_21_P0014104	-0.0495319	Compromised	0.0495319	Compromised	0	-0.0999613	Compromised	0.214566	Compromised	0.0573025	0.761352	1.8	1.9	1.65	1.77	A_21_P0014104	Unknown
A_21_P0014121	-0.0512953	Compromised	0.0512958	Compromised	2.385e-07	1.52235	Compromised	0.23705	Compromised	0.879702	0.305649	1.72	1.82	4.86	1.72	A_21_P0014121	Unknown
A_21_P0014122	-0.0369568	Detected	0.0369565	Detected	-1.185e-07	0.0805798	Detected	-0.434456	Compromised	-0.176938	0.566596	13.4	13.9	13.8	8.33	A_21_P0014122	Unknown
A_21_P0014126	-0.245976	Detected	0.245976	Detected	0	-0.444069	Detected	-0.421287	Detected	-0.432678	0.220973	34.2	47.4	28.3	24.8	A_21_P0014126	Unknown
A_21_P0014154	-0.0501752	Compromised	0.0501752	Compromised	0	-0.0676403	Compromised	0.229996	Compromised	0.0811779	0.656711	1.77	1.87	1.66	1.76	A_21_P0014154	Unknown
A_21_P0014163	-0.051527	Compromised	0.0515275	Compromised	2.385e-07	-0.07235	Compromised	0.236818	Compromised	0.0822341	0.663903	1.71	1.81	1.6	1.71	A_21_P0014163	Unknown
A_21_P0014169	-0.224865	Compromised	0.224866	Compromised	2.35e-07	0.983861	Detected	-0.591643	Compromised	0.196109	0.833103	4.74	6.38	10.4	3.01	A_21_P0014169	Unknown
A_21_P0014178	-0.0463076	Compromised	0.0463071	Compromised	-2.385e-07	0.0287938	Compromised	0.217376	Compromised	0.123085	0.362007	1.77	1.86	1.77	1.74	A_21_P0014178	Unknown
A_21_P0014192	0.0382273	Detected	-0.0382273	Detected	0	-0.014776	Detected	0.135275	Detected	0.0602493	0.548542	153	143	140	134	A_21_P0014192	Unknown
A_21_P0014193	0.332732	Compromised	-0.332732	Compromised	1.2e-07	-0.043314	Compromised	-0.504158	Compromised	-0.273736	0.568553	8.9	5.53	6.51	4.08	A_21_P0014193	Unknown
A_21_P0014203	0.104078	Detected	-0.104078	Compromised	1.18e-07	0.392424	Detected	-0.699835	Compromised	-0.153706	0.808138	11.3	9.64	13.1	5.3	A_21_P0014203	Unknown
A_21_P0014212	0.14075	Compromised	-0.14075	Compromised	0	0.0466228	Compromised	0.605402	Compromised	0.326012	0.406782	7.77	6.3	6.91	8.78	A_21_P0014212	Unknown
A_21_P0014213	-0.139197	Detected	0.139197	Detected	0	0.529378	Detected	-0.229363	Detected	0.150008	0.746114	16.9	20.2	25.5	13	A_21_P0014213	Unknown
A_21_P0014219	-0.0193455	Detected	0.0193455	Detected	0	-0.150468	Detected	-0.146038	Detected	-0.148253	0.016817	48.8	49.4	42.3	36.6	A_21_P0014219	Unknown
A_21_P0014240	-0.476974	Compromised	0.476974	Compromised	0	-0.484334	Compromised	1.12159	Compromised	0.31863	0.765487	1.98	3.78	1.87	4.91	A_21_P0014240	Unknown
A_21_P0014255	-0.357906	Detected	0.357906	Detected	0	0.128874	Detected	-1.18258	Detected	-0.526853	0.553726	21.5	34.8	28.6	9.94	A_21_P0014255	Unknown
A_21_P0014259	-0.222435	Detected	0.222435	Detected	0	0.348944	Detected	0.48534	Detected	0.417142	0.214843	24.6	33	34.7	32.9	A_21_P0014259	Unknown
A_21_P0014263	-0.0481095	Compromised	0.0481095	Compromised	0	-0.0769591	Compromised	0.209042	Compromised	0.0660412	0.704325	1.87	1.97	1.74	1.83	A_21_P0014263	Unknown
A_21_P0014264	-0.0568552	Compromised	0.0568552	Compromised	0	-0.0650826	Compromised	0.179023	Compromised	0.0569701	0.713368	1.96	2.09	1.85	1.89	A_21_P0014264	Unknown
A_21_P0014265	-0.0326147	Compromised	0.0326142	Compromised	-2.39e-07	-0.140579	Compromised	0.155127	Compromised	0.00727367	0.966049	1.93	1.99	1.7	1.8	A_21_P0014265	Unknown
A_21_P0014294	0.620987	Detected	-0.620986	Compromised	1.2e-07	-2.26327	Compromised	-0.27874	Compromised	-1.27101	0.391011	12.6	5.25	1.62	5.53	A_21_P0014294	Unknown
A_21_P0014305	-0.0467873	Compromised	0.0467868	Compromised	-2.385e-07	-0.0797458	Compromised	0.211501	Compromised	0.0658777	0.70866	1.94	2.04	1.8	1.9	A_21_P0014305	Unknown
A_21_P0014320	0.457044	Compromised	-0.457044	Compromised	-2.35e-07	-0.597916	Compromised	-0.279702	Compromised	-0.438809	0.460257	3.48	1.82	1.59	1.71	A_21_P0014320	Unknown
A_21_P0014324	0.0619271	Detected	-0.0619271	Detected	0	0.0653398	Detected	-0.123215	Detected	-0.0289376	0.821508	72.2	65.3	68.7	52	A_21_P0014324	Unknown
A_21_P0014345	0.0276155	Detected	-0.0276155	Detected	0	0.0990872	Detected	-0.0146022	Detected	0.0422425	0.572682	79.6	75.5	79.4	63.3	A_21_P0014345	Unknown
A_21_P0014374	-0.044796	Compromised	0.0447965	Compromised	2.385e-07	1.06117	Compromised	0.778257	Compromised	0.919711	0.0250538	1.85	1.94	3.78	2.68	A_21_P0014374	Unknown
A_21_P0014382	-0.209723	Compromised	0.209724	Compromised	2.4e-07	-0.480397	Compromised	0.431436	Compromised	-0.0244807	0.965526	6.1	8.04	4.8	7.79	A_21_P0014382	Unknown
A_21_P0014384	-0.0542622	Compromised	0.0542622	Compromised	0	-0.0898643	Compromised	1.37456	Compromised	0.64235	0.473904	1.76	1.87	1.63	3.88	A_21_P0014384	Unknown
A_21_P0014386	0.455113	Compromised	-0.455113	Compromised	0	-0.758175	Compromised	-0.851593	Compromised	-0.804884	0.220598	5.74	3.01	2.35	1.9	A_21_P0014386	Unknown
A_21_P0014391	0.104947	Detected	-0.104946	Detected	1.175e-07	-0.534331	Detected	0.643464	Detected	0.0545666	0.93563	16.9	14.4	10.3	20.1	A_21_P0014391	Unknown
A_21_P0014394	0.138293	Detected	-0.138293	Compromised	0	0.284672	Detected	-0.579593	Compromised	-0.147461	0.776027	9.28	7.55	9.75	4.62	A_21_P0014394	Unknown
A_21_P0014413	-0.541463	Compromised	0.541463	Compromised	0	-0.708723	Compromised	1.09534	Compromised	0.193307	0.871159	1.94	4.05	1.64	4.94	A_21_P0014413	Unknown
A_21_P0014414	-0.446071	Compromised	0.446071	Compromised	0	1.03414	Detected	-0.999222	Compromised	0.0174613	0.98888	3.1	5.67	8.21	1.73	A_21_P0014414	Unknown
A_21_P0014417	-0.0451617	Compromised	0.0451622	Compromised	2.38e-07	1.24895	Compromised	0.610127	Compromised	0.929538	0.10229	1.83	1.92	4.26	2.36	A_21_P0014417	Unknown
A_21_P0014418	-0.377493	Compromised	0.377493	Compromised	2.4e-07	0.29266	Compromised	-0.112109	Compromised	0.0902753	0.852595	1.9	3.16	2.87	1.87	A_21_P0014418	Unknown
A_21_P0014420	0.00258517	Detected	-0.00258517	Detected	0	-1.37332	Compromised	0.154726	Detected	-0.609298	0.50881	11.1	10.9	4.06	10.1	A_21_P0014420	Unknown
A_21_P0014433	-0.457342	Compromised	0.457342	Detected	0	0.183168	Detected	0.496787	Detected	0.339977	0.554771	6.19	11.5	9.16	9.82	A_21_P0014433	Unknown
A_21_P0014438	-0.121158	Compromised	0.121157	Compromised	-2.38e-07	-0.170863	Compromised	0.151158	Compromised	-0.0098524	0.965448	1.81	2.11	1.66	1.79	A_21_P0014438	Unknown
A_21_P0014447	0.962939	Compromised	-0.962939	Compromised	0	0.228605	Compromised	-0.778117	Compromised	-0.274756	0.823988	6.94	1.8	3.96	1.7	A_21_P0014447	Unknown
A_21_P0014457	-0.0473423	Compromised	0.0473418	Compromised	-2.38e-07	0.404527	Compromised	0.187136	Compromised	0.295831	0.130013	1.91	2.01	2.48	1.84	A_21_P0014457	Unknown
A_21_P0014467	-0.0639882	Compromised	0.0639882	Compromised	0	-0.0678382	Compromised	0.24133	Compromised	0.086746	0.655776	1.69	1.82	1.6	1.71	A_21_P0014467	Unknown
A_21_P0014468	-0.123803	Compromised	0.123803	Compromised	2.4e-07	0.0282068	Compromised	1.10513	Compromised	0.566668	0.412913	3.47	4.06	3.66	6.66	A_21_P0014468	Unknown
A_21_P0014484	-0.242751	Compromised	0.24275	Compromised	-2.35e-07	0.22954	Compromised	0.541122	Compromised	0.385331	0.313306	3.66	5.05	4.82	5.16	A_21_P0014484	Unknown
A_21_P0014492	-0.0209854	Detected	0.0209854	Detected	0	0.126009	Detected	0.369001	Detected	0.247505	0.182498	1370	1390	1440	1470	A_21_P0014492	Unknown
A_21_P0014500	-0.0597324	Compromised	0.0597324	Compromised	0	-0.072094	Compromised	0.237074	Compromised	0.0824902	0.667996	1.7	1.82	1.6	1.71	A_21_P0014500	Unknown
A_21_P0014506	-0.0357175	Compromised	0.0357175	Compromised	0	-0.156403	Compromised	0.138371	Compromised	-0.00901628	0.957997	1.97	2.04	1.72	1.82	A_21_P0014506	Unknown
A_21_P0014523	-0.0537848	Compromised	0.0537853	Compromised	2.385e-07	-0.0707126	Compromised	0.226433	Compromised	0.0778601	0.670969	1.78	1.89	1.67	1.77	A_21_P0014523	Unknown
A_21_P0014524	-0.0526371	Compromised	0.0526371	Compromised	0	-0.0669708	Compromised	0.211861	Compromised	0.0724452	0.674919	1.83	1.94	1.72	1.8	A_21_P0014524	Unknown
A_21_P0014532	-1.60841	Compromised	1.60841	Detected	2e-07	-1.73921	Compromised	-1.45401	Compromised	-1.59661	0.426989	2.03	18.6	1.76	1.85	A_21_P0014532	Unknown
A_21_P0014540	-0.0479145	Compromised	0.0479145	Compromised	0	-0.126523	Compromised	0.169658	Compromised	0.0215676	0.902486	1.88	1.98	1.69	1.79	A_21_P0014540	Unknown
A_21_P0014541	-0.840591	Compromised	0.840591	Compromised	2.25e-07	-0.902992	Compromised	-0.583439	Compromised	-0.743216	0.476636	1.87	5.91	1.7	1.83	A_21_P0014541	Unknown
A_21_P0014546	0.0153003	Compromised	-0.0153003	Compromised	0	-0.162519	Compromised	0.166867	Compromised	0.00217414	0.990706	1.99	1.92	1.67	1.81	A_21_P0014546	Unknown
A_21_P0014581	-0.836569	Compromised	0.836569	Compromised	-1e-07	-0.471961	Compromised	0.778277	Compromised	0.153158	0.896851	3.15	9.9	3.85	7.9	A_21_P0014581	Unknown
A_21_P0014590	-0.412795	Compromised	0.412796	Compromised	2.35e-07	-1.98062	Compromised	-0.603467	Compromised	-1.29205	0.248818	5.84	10.2	1.87	4.19	A_21_P0014590	Unknown
A_21_P0014605	0.815165	Compromised	-0.815164	Compromised	2.35e-07	-0.505663	Compromised	-0.027277	Compromised	-0.26647	0.783466	6	1.91	2.28	2.74	A_21_P0014605	Unknown
A_21_P0014607	0.240344	Detected	-0.240344	Detected	0	-1.37713	Compromised	0.229129	Detected	-0.573999	0.56423	16	11.3	4.95	13	A_21_P0014607	Unknown
A_21_P0014610	0.539771	Compromised	-0.539772	Compromised	-2.3e-07	-0.664701	Compromised	-0.354949	Compromised	-0.509825	0.459769	3.86	1.8	1.59	1.7	A_21_P0014610	Unknown
A_21_P0014613	-0.0593362	Compromised	0.0593362	Compromised	0	-0.0658488	Compromised	0.645849	Compromised	0.29	0.50584	2	2.14	1.89	2.67	A_21_P0014613	Unknown
A_21_P0014614	0.646524	Compromised	-0.646524	Compromised	0	0.563136	Compromised	-0.231141	Compromised	0.165998	0.847121	6.44	2.59	5.77	2.87	A_21_P0014614	Unknown
A_21_P0014630	-0.0453482	Compromised	0.0453477	Compromised	-2.385e-07	-0.103002	Compromised	0.186414	Compromised	0.0417058	0.809107	1.82	1.91	1.66	1.75	A_21_P0014630	Unknown
A_21_P0014634	0.193057	Compromised	-0.193057	Compromised	0	-0.331662	Compromised	-0.00639153	Compromised	-0.169027	0.572067	2.44	1.84	1.61	1.74	A_21_P0014634	Unknown
A_21_P0014654	-0.0586386	Compromised	0.0586381	Compromised	-2.385e-07	-0.0777526	Compromised	0.221391	Compromised	0.0718193	0.698595	1.74	1.86	1.63	1.73	A_21_P0014654	Unknown
A_21_P0014656	0.0385809	Compromised	-0.0385814	Compromised	-2.38e-07	-0.991114	Compromised	-0.0409045	Compromised	-0.516009	0.392169	4.71	4.4	2.19	3.65	A_21_P0014656	Unknown
A_21_P0014667	-0.0444384	Compromised	0.0444388	Compromised	2.39e-07	-0.10684	Compromised	0.212713	Compromised	0.0529363	0.779832	1.87	1.96	1.7	1.83	A_21_P0014667	Unknown
A_21_P0014673	-0.0105305	Compromised	0.0105309	Compromised	2.385e-07	-0.144016	Compromised	0.184706	Compromised	0.020345	0.912984	2.08	2.08	1.8	1.95	A_21_P0014673	Unknown
A_21_P0014680	-0.0442624	Compromised	0.0442619	Compromised	-2.39e-07	-0.12287	Compromised	0.17331	Compromised	0.0252197	0.885383	1.88	1.97	1.69	1.79	A_21_P0014680	Unknown
A_21_P0014690	0.00481796	Compromised	-0.00481749	Compromised	2.383e-07	-1.7895	Compromised	-1.5218	Compromised	-1.65565	0.00648035	6.65	6.51	1.82	1.89	A_21_P0014690	Unknown
A_21_P0014692	0.0668304	Detected	-0.0668306	Detected	-1.175e-07	-0.0682859	Detected	-0.229176	Compromised	-0.148731	0.290924	11.8	10.6	10.2	7.87	A_21_P0014692	Unknown
A_21_P0014698	-0.499844	Compromised	0.499844	Compromised	2.35e-07	-0.629562	Compromised	0.442506	Compromised	-0.093528	0.910131	2.04	4.02	1.77	3.21	A_21_P0014698	Unknown
A_21_P0014717	-0.358851	Detected	0.358851	Detected	0	-0.598934	Compromised	0.645632	Detected	0.0233489	0.977022	9.07	14.7	7.29	14.9	A_21_P0014717	Unknown
A_21_P0014731	1.23376	Detected	-1.23376	Compromised	-2e-07	0.439191	Compromised	0.05544	Compromised	0.247315	0.861293	11	1.96	6.02	3.98	A_21_P0014731	Unknown
A_21_P0014734	-0.488469	Compromised	0.48847	Compromised	2.4e-07	-1.06049	Compromised	-0.742273	Compromised	-0.90138	0.221419	2.49	4.83	1.59	1.71	A_21_P0014734	Unknown
A_21_P0014743	-0.366629	Compromised	0.36663	Compromised	2.4e-07	1.28059	Compromised	0.367127	Compromised	0.823858	0.294786	1.88	3.08	5.59	2.56	A_21_P0014743	Unknown
A_21_P0014748	0.0811598	Detected	-0.0811598	Detected	0	-0.368737	Detected	0.216226	Detected	-0.0762553	0.825095	37.7	33.2	26.2	33.9	A_21_P0014748	Unknown
A_21_P0014749	-0.042429	Detected	0.042429	Detected	0	0.246268	Detected	0.555513	Detected	0.400891	0.129588	37.6	39.3	43.6	46.6	A_21_P0014749	Unknown
A_21_P0014750	0.303013	Compromised	-0.303013	Compromised	0	-0.427943	Compromised	-0.118191	Compromised	-0.273067	0.506501	2.78	1.8	1.59	1.7	A_21_P0014750	Unknown
A_21_P0014751	0.112382	Detected	-0.112382	Detected	0	0.230127	Detected	-0.0599074	Detected	0.0851099	0.688313	30	25.3	30.9	21.8	A_21_P0014751	Unknown
A_21_P0014752	-0.0497441	Compromised	0.0497437	Compromised	-2.39e-07	-0.0747542	Compromised	0.230519	Compromised	0.0778823	0.675519	1.79	1.89	1.67	1.78	A_21_P0014752	Unknown
A_21_P0014754	0.287197	Compromised	-0.287197	Compromised	0	-0.843348	Compromised	-1.37648	Compromised	-1.10991	0.105311	8.28	5.48	3.59	2.14	A_21_P0014754	Unknown
A_21_P0014755	-0.607442	Detected	0.607442	Detected	0	-0.397411	Detected	-0.985523	Detected	-0.691467	0.413302	15.3	35	16.8	9.64	A_21_P0014755	Unknown
A_21_P0014758	0.0933595	Compromised	-0.0933595	Compromised	0	-0.539992	Compromised	0.261035	Compromised	-0.139478	0.766792	8.35	7.23	5.11	7.68	A_21_P0014758	Unknown
A_21_P0014763	-0.456151	Compromised	0.456151	Compromised	-1.25e-07	-0.0991826	Compromised	0.880754	Detected	0.390786	0.61845	4.82	8.94	5.86	9.97	A_21_P0014763	Unknown
A_21_P0014766	-0.171002	Detected	0.171002	Detected	0	-0.0332701	Detected	-0.170523	Detected	-0.101897	0.635817	29.3	36.6	30.6	24	A_21_P0014766	Unknown
A_21_P0014769	-0.0732966	Compromised	0.0732961	Compromised	-2.4e-07	-0.0576963	Compromised	0.193023	Compromised	0.0676632	0.687069	1.98	2.16	1.9	1.95	A_21_P0014769	Unknown
A_21_P0014770	0.223779	Compromised	-0.223779	Compromised	0	-0.0429087	Compromised	-0.0449324	Compromised	-0.0439205	0.862537	2.56	1.85	2.02	1.74	A_21_P0014770	Unknown
A_21_P0014771	-0.0527976	Detected	0.0527976	Detected	0	0.0591404	Detected	0.0141919	Detected	0.0366662	0.588248	116	123	119	99.5	A_21_P0014771	Unknown
A_21_P0014772	-0.0557385	Compromised	0.0557385	Compromised	0	-0.0770998	Compromised	0.614978	Compromised	0.268939	0.523106	2.01	2.14	1.88	2.62	A_21_P0014772	Unknown
A_21_P0014774	-0.455198	Compromised	0.455197	Compromised	-2.35e-07	-0.520647	Compromised	-0.34135	Compromised	-0.430998	0.450966	2.37	4.39	2.15	2.1	A_21_P0014774	Unknown
A_21_P0014777	0.0850568	Compromised	-0.0850573	Compromised	-2.4e-07	-0.534889	Compromised	-1.35877	Compromised	-0.946829	0.153247	7.01	6.14	4.33	2.11	A_21_P0014777	Unknown
A_21_P0014780	-0.280044	Compromised	0.280044	Compromised	-2.4e-07	-1.01461	Compromised	-0.672239	Compromised	-0.843425	0.123912	4.68	6.8	2.67	2.92	A_21_P0014780	Unknown
A_21_P0014787	0.0127406	Compromised	-0.0127406	Compromised	0	0.993205	Compromised	0.165108	Compromised	0.579156	0.296955	1.89	1.83	3.54	1.72	A_21_P0014787	Unknown
A_21_P0014790	0.152908	Detected	-0.152908	Detected	0	-0.0742898	Detected	-0.721771	Detected	-0.398031	0.381992	36.5	29.1	29.6	16.3	A_21_P0014790	Unknown
A_21_P0014792	-0.185106	Detected	0.185106	Detected	0	0.652497	Detected	-0.129206	Detected	0.261645	0.606678	16.8	21.4	28.5	14.3	A_21_P0014792	Unknown
A_21_P0014799	-0.0784724	Detected	0.0784724	Detected	0	0.307831	Detected	0.361876	Detected	0.334853	0.0562945	16.2	17.8	20.1	18	A_21_P0014799	Unknown
A_21_P0014808	0.149314	Detected	-0.149314	Detected	0	-0.223858	Detected	-0.192817	Detected	-0.208337	0.299584	805	645	590	520	A_21_P0014808	Unknown
A_21_P0014811	0.545574	Compromised	-0.545574	Compromised	2.5e-07	0.359603	Compromised	-0.532863	Compromised	-0.0866299	0.913416	4.41	2.04	3.68	1.71	A_21_P0014811	Unknown
A_21_P0014819	0.267229	Detected	-0.267229	Detected	0	-1.30339	Compromised	-2.19134	Compromised	-1.74736	0.0778196	19.4	13.2	6.2	2.89	A_21_P0014819	Unknown
A_21_P0014821	-0.278907	Compromised	0.278907	Compromised	0	0.95933	Compromised	-0.299007	Compromised	0.330161	0.678756	2.13	3.09	4.77	1.72	A_21_P0014821	Unknown
A_21_P0014826	0.0766516	Compromised	-0.0766511	Compromised	2.35e-07	-1.21857	Compromised	-1.07451	Compromised	-1.14654	0.00831158	7.73	6.85	2.99	2.85	A_21_P0014826	Unknown
A_21_P0014828	-0.823571	Compromised	0.823571	Compromised	0	-0.9623	Compromised	-0.249069	Compromised	-0.605685	0.569313	1.96	6.05	1.69	2.39	A_21_P0014828	Unknown
A_21_P0014834	-0.180776	Detected	0.180776	Detected	0	0.0468473	Detected	-0.0455875	Detected	0.000629901	0.997613	27.8	35.2	30.9	25	A_21_P0014834	Unknown
A_21_P0014845	-0.857738	Compromised	0.857738	Compromised	0	-0.98854	Compromised	-0.703346	Compromised	-0.845943	0.433224	2.03	6.57	1.76	1.85	A_21_P0014845	Unknown
A_21_P0014849	-0.106853	Detected	0.106853	Detected	0	-0.00560927	Detected	-0.195042	Detected	-0.100326	0.555065	87.5	100	89.1	67.4	A_21_P0014849	Unknown
A_21_P0014850	0.0441318	Compromised	-0.0441318	Compromised	0	-0.270419	Compromised	-1.23551	Compromised	-0.752966	0.26043	5.07	4.7	3.87	1.71	A_21_P0014850	Unknown
A_21_P0014854	0.346374	Compromised	-0.346373	Compromised	2.4e-07	-0.00199127	Compromised	0.449657	Compromised	0.223833	0.642516	5.15	3.14	3.84	4.53	A_21_P0014854	Unknown
A_21_P0014855	0.269391	Detected	-0.269392	Compromised	-1.2e-07	-0.52103	Compromised	0.375685	Compromised	-0.0726725	0.902228	9.11	6.18	5	8.03	A_21_P0014855	Unknown
A_21_P0014859	-0.250192	Compromised	0.250192	Compromised	2.35e-07	0.329499	Compromised	-0.0725932	Compromised	0.128453	0.7277	2.03	2.83	2.88	1.88	A_21_P0014859	Unknown
A_21_P0014862	-0.0181744	Detected	0.0181744	Detected	0	0.245725	Detected	0.309959	Detected	0.277842	0.0171875	751	759	856	772	A_21_P0014862	Unknown
A_21_P0014864	-0.0267696	Detected	0.0267696	Detected	0	0.378825	Detected	0.0929136	Detected	0.235869	0.246313	57.1	58.4	71.8	50.8	A_21_P0014864	Unknown
A_21_P0014867	-0.529665	Compromised	0.529665	Compromised	0	0.803938	Compromised	-0.0189281	Compromised	0.392505	0.617628	1.86	3.82	4.45	2.17	A_21_P0014867	Unknown
A_21_P0014875	0.156546	Compromised	-0.156547	Compromised	-2.4e-07	-0.308367	Compromised	-0.000907898	Compromised	-0.154638	0.553957	2.37	1.88	1.63	1.74	A_21_P0014875	Unknown
A_21_P0014876	0.0760658	Detected	-0.0760658	Detected	0	-0.244418	Detected	0.297608	Detected	0.0265946	0.933341	221	196	168	211	A_21_P0014876	Unknown
A_21_P0014877	-0.214066	Detected	0.214066	Detected	0	0.239058	Detected	0.495658	Detected	0.367358	0.278889	22.7	30.1	29.5	30.4	A_21_P0014877	Unknown
A_21_P0014880	0.00119901	Detected	-0.00119901	Detected	0	0.305326	Detected	0.327814	Detected	0.31657	0.00127346	186	183	218	191	A_21_P0014880	Unknown
A_21_P0014882	-0.00696874	Detected	0.00696874	Detected	0	-0.0426142	Detected	0.162936	Detected	0.0601606	0.618301	20.3	20.2	18.8	18.7	A_21_P0014882	Unknown
A_21_P0014893	-0.355361	Compromised	0.355361	Detected	0	-0.662914	Compromised	-0.616228	Compromised	-0.639571	0.21435	8.37	13.5	6.42	5.72	A_21_P0014893	Unknown
A_21_P0014894	-0.0330746	Detected	0.0330746	Detected	0	-1.74148	Compromised	-0.986848	Compromised	-1.36417	0.069186	18.9	19.5	5.49	7.99	A_21_P0014894	Unknown
A_21_P0014897	-0.0832777	Compromised	0.0832782	Compromised	2.4e-07	0.462597	Compromised	-0.51346	Compromised	-0.0254316	0.963701	3.11	3.44	4.31	1.89	A_21_P0014897	Unknown
A_21_P0014903	-0.0837736	Detected	0.0837736	Detected	0	0.692614	Detected	0.226431	Detected	0.459523	0.204712	26.2	29	42.6	26.6	A_21_P0014903	Unknown
A_21_P0014905	-0.308336	Compromised	0.308336	Compromised	0	-0.341383	Compromised	-0.0361099	Compromised	-0.188746	0.638336	1.8	2.72	1.67	1.78	A_21_P0014905	Unknown
A_21_P0014907	-0.276728	Compromised	0.276728	Compromised	0	-0.320504	Compromised	1.49821	Compromised	0.588852	0.598757	1.77	2.56	1.63	4.96	A_21_P0014907	Unknown
A_21_P0014911	-0.0383675	Detected	0.0383675	Detected	0	-0.0661848	Detected	0.216481	Detected	0.0751481	0.658915	305	317	284	298	A_21_P0014911	Unknown
A_21_P0014912	-0.627763	Compromised	0.627763	Detected	0	-0.00453639	Detected	-0.138311	Compromised	-0.0714239	0.920256	5.95	14	8.7	6.84	A_21_P0014912	Unknown
A_21_P0014925	-0.0517616	Compromised	0.0517616	Compromised	0	-0.0731683	Compromised	0.236584	Compromised	0.0817077	0.666451	1.7	1.8	1.59	1.7	A_21_P0014925	Unknown
A_21_P0014931	-0.051527	Compromised	0.0515275	Compromised	2.385e-07	-0.0813951	Compromised	0.236818	Compromised	0.0777116	0.687851	1.71	1.81	1.59	1.71	A_21_P0014931	Unknown
A_21_P0014936	0.221253	Compromised	-0.221253	Compromised	-2.4e-07	-0.370747	Compromised	-0.0480914	Compromised	-0.209419	0.524313	2.62	1.9	1.65	1.78	A_21_P0014936	Unknown
A_21_P0014946	-0.268578	Compromised	0.268579	Compromised	2.4e-07	-0.0487242	Compromised	-1.12843	Compromised	-0.588579	0.431949	3.79	5.42	4.19	1.71	A_21_P0014946	Unknown
A_22_P00005983	-0.527416	Compromised	0.527416	Compromised	-2.25e-07	-0.444742	Compromised	1.04282	Compromised	0.29904	0.774088	1.9	3.89	1.91	4.62	A_22_P00005983	Unknown
A_23_P90470	-0.0457253	Detected	0.0457253	Detected	0	0.0997653	Detected	0.0483251	Detected	0.0740452	0.293601	100	105	105	87.4	A_23_P90470	Unknown
A_24_P229726	-0.138396	Compromised	0.138395	Compromised	-2.4e-07	-1.02874	Compromised	-0.790108	Compromised	-0.909422	0.0380805	3.3	3.94	1.69	1.72	A_24_P229726	Unknown
A_24_P246636	-0.0512953	Compromised	0.0512958	Compromised	2.385e-07	2.19745	Compromised	0.23705	Compromised	1.21725	0.340682	1.72	1.82	7.76	1.72	A_24_P246636	Unknown
A_24_P280926	0.00532341	Detected	-0.00532389	Detected	-2.385e-07	-0.0508199	Detected	-0.0204401	Detected	-0.03563	0.157297	13800	13500	12600	11100	A_24_P280926	Unknown
A_24_P32766	0.0183268	Detected	-0.0183272	Detected	-2.38e-07	-0.0167546	Detected	0.188835	Detected	0.0860403	0.496558	20400	19600	18900	18800	A_24_P32766	Unknown
A_24_P504621	-0.0487061	Compromised	0.0487061	Compromised	0	-0.0709019	Compromised	0.215923	Compromised	0.0725105	0.679347	1.84	1.94	1.72	1.81	A_24_P504621	Unknown
A_24_P613108	-0.0473213	Compromised	0.0473208	Compromised	-2.385e-07	-0.0856018	Compromised	0.232612	Compromised	0.0735049	0.701187	1.72	1.81	1.59	1.71	A_24_P613108	Unknown
A_24_P662366	0.0538895	Detected	-0.0538895	Detected	0	-0.30094	Detected	-0.339884	Detected	-0.320412	0.0305237	71.4	65.3	53	44.5	A_24_P662366	Unknown
A_24_P704878	0.105845	Compromised	-0.105845	Compromised	2.375e-07	-0.641055	Compromised	-0.490332	Compromised	-0.565693	0.0489178	7.92	6.74	4.48	4.29	A_24_P704878	Unknown
A_24_P818268	0.0389271	Detected	-0.0389268	Detected	1.2e-07	0.246783	Detected	0.353112	Detected	0.299948	0.0450245	16.6	15.5	18.2	16.9	A_24_P818268	Unknown
A_24_P833256	-0.0479145	Compromised	0.0479145	Compromised	0	-0.0761909	Compromised	0.201542	Compromised	0.0626755	0.711169	1.88	1.98	1.75	1.83	A_24_P833256	Unknown
A_24_P935506	-0.475336	Compromised	0.475336	Compromised	0	-0.640549	Compromised	-0.322968	Compromised	-0.481759	0.437839	1.89	3.6	1.6	1.72	A_24_P935506	Unknown
A_32_P10100	0.0616646	Detected	-0.0616651	Detected	-2.39e-07	-0.126268	Detected	0.117564	Detected	-0.00435186	0.977484	16800	15200	14000	14300	A_32_P10100	Unknown
A_32_P102252	-0.00627446	Detected	0.00627446	Detected	0	-0.0737779	Detected	-0.345961	Detected	-0.209869	0.263347	1700	1690	1540	1100	A_32_P102252	Unknown
A_32_P113154	0.116319	Detected	-0.116318	Detected	2.37e-07	-0.109884	Detected	-0.0476093	Detected	-0.0787466	0.580279	9550	8010	7750	6980	A_32_P113154	Unknown
A_32_P125549	0.13385	Detected	-0.13385	Detected	2.4e-07	-0.23546	Detected	-0.0686102	Detected	-0.152035	0.436774	21500	17600	15800	15300	A_32_P125549	Unknown
A_32_P152696	0.0377283	Detected	-0.0377278	Detected	2.385e-07	-0.018415	Detected	0.0801497	Detected	0.0308673	0.668251	9890	9250	9030	8340	A_32_P152696	Unknown
A_32_P153979	-0.0322814	Compromised	0.0322814	Compromised	0	-0.154037	Compromised	0.1412	Compromised	-0.00641894	0.969976	1.96	2.02	1.71	1.81	A_32_P153979	Unknown
A_32_P185628	0.486122	Detected	-0.486122	Compromised	0	-0.235685	Compromised	-0.385011	Compromised	-0.310348	0.592526	8.6	4.32	4.95	3.85	A_32_P185628	Unknown
A_32_P230825	0.0270205	Detected	-0.02702	Detected	2.38e-07	-0.0429282	Detected	0.184122	Detected	0.0705969	0.606702	6900	6550	6240	6300	A_32_P230825	Unknown
A_32_P48615	-0.143788	Detected	0.143788	Detected	0	-0.205668	Detected	-0.305756	Detected	-0.255712	0.235052	27.6	33.2	25.1	20.2	A_32_P48615	Unknown
A_32_P53558	0.0469773	Detected	-0.0469773	Detected	0	0.0714529	Detected	-0.0343716	Detected	0.0185406	0.817816	261	241	252	202	A_32_P53558	Unknown
A_32_P79115	-0.053504	Detected	0.053504	Detected	0	-0.150946	Detected	-0.197474	Detected	-0.17421	0.0962399	89.6	95.1	79.5	66.4	A_32_P79115	Unknown
A_32_P88905	0.0763419	Detected	-0.0763419	Detected	0	-0.0732634	Detected	-0.145928	Detected	-0.109596	0.3243	520	461	445	365	A_32_P88905	Unknown
A_33_P3209135	-1.09462	Compromised	1.09462	Compromised	2.5e-07	0.565443	Compromised	-0.870406	Compromised	-0.152482	0.917912	1.84	8.27	5.52	1.76	A_33_P3209135	Unknown
A_33_P3209185	0.202709	Compromised	-0.202709	Compromised	0	-0.683956	Compromised	-1.3474	Compromised	-1.01568	0.120572	6.33	4.71	3.25	1.77	A_33_P3209185	Unknown
A_33_P3209209	-0.0481095	Compromised	0.0481095	Compromised	0	-0.0769591	Compromised	0.322698	Compromised	0.122869	0.610651	1.87	1.97	1.74	1.98	A_33_P3209209	Unknown
A_33_P3209566	-0.0578489	Compromised	0.0578489	Compromised	0	-0.066649	Compromised	0.222322	Compromised	0.0778368	0.666596	1.77	1.89	1.67	1.76	A_33_P3209566	Unknown
A_33_P3209696	-1.16927	Compromised	1.16927	Compromised	2.5e-07	0.470927	Compromised	1.10793	Compromised	0.78943	0.581631	1.95	9.72	5.77	7.74	A_33_P3209696	Unknown
A_33_P3209703	-0.457658	Compromised	0.457659	Compromised	1.15e-07	-1.80369	Compromised	-0.92363	Compromised	-1.36366	0.164785	4.74	8.81	1.77	2.81	A_33_P3209703	Unknown
A_33_P3209756	0.0108588	Detected	-0.0108588	Detected	0	0.233358	Detected	0.208265	Detected	0.220811	0.00559951	75.3	73.1	83.4	70.7	A_33_P3209756	Unknown
A_33_P3209924	-0.0177803	Compromised	0.0177808	Compromised	2.38e-07	-0.188331	Compromised	0.108814	Compromised	-0.0397584	0.815347	1.98	2	1.67	1.77	A_33_P3209924	Unknown
A_33_P3210069	0.0896566	Detected	-0.0896566	Detected	0	0.0699689	Detected	0.434448	Detected	0.252208	0.340185	80.2	69.8	75.1	83.4	A_33_P3210069	Unknown
A_33_P3210516	0.196988	Detected	-0.196988	Detected	0	0.416861	Detected	0.637336	Detected	0.527099	0.144647	18	13.5	19.9	20	A_33_P3210516	Unknown
A_33_P3210561	0.0958729	Detected	-0.0958734	Detected	-2.38e-07	-0.171713	Detected	-0.0783091	Detected	-0.125011	0.361834	17500	15100	13800	12700	A_33_P3210561	Unknown
A_33_P3210605	-0.255323	Compromised	0.255323	Compromised	0	0.44781	Compromised	0.363668	Compromised	0.405739	0.257421	1.98	2.78	3.06	2.49	A_33_P3210605	Unknown
A_33_P3210969	-0.107881	Detected	0.107881	Detected	0	0.894085	Detected	-0.536527	Detected	0.178779	0.827855	52.6	60.2	100	32	A_33_P3210969	Unknown
A_33_P3210975	0.570733	Compromised	-0.570733	Compromised	0	-1.10468	Compromised	-0.582264	Compromised	-0.843471	0.311165	5.35	2.39	1.59	1.97	A_33_P3210975	Unknown
A_33_P3211018	-0.0732966	Compromised	0.0732961	Compromised	-2.4e-07	-0.0576963	Compromised	0.193023	Compromised	0.0676632	0.687069	1.98	2.16	1.9	1.95	A_33_P3211018	Unknown
A_33_P3211098	0.0670547	Compromised	-0.0670543	Compromised	2.4e-07	-0.730732	Compromised	0.638854	Compromised	-0.0459394	0.952842	3.04	2.73	1.66	3.7	A_33_P3211098	Unknown
A_33_P3211223	-0.493893	Detected	0.493893	Detected	0	-2.09092	Compromised	-1.15174	Compromised	-1.62133	0.140408	9.21	18	2.89	4.78	A_33_P3211223	Unknown
A_33_P3211478	-0.14775	Compromised	0.14775	Compromised	0	1.34753	Compromised	1.90613	Compromised	1.62683	0.0357148	2.1	2.54	5.62	7.14	A_33_P3211478	Unknown
A_33_P3211854	-0.0907626	Compromised	0.0907631	Compromised	2.375e-07	-0.112169	Compromised	0.206044	Compromised	0.0469375	0.821712	1.7	1.9	1.59	1.71	A_33_P3211854	Unknown
A_33_P3211862	-0.0540223	Compromised	0.0540223	Compromised	0	-0.0714874	Compromised	0.226149	Compromised	0.0773308	0.67354	1.77	1.88	1.66	1.76	A_33_P3211862	Unknown
A_33_P3212052	-0.725683	Compromised	0.725683	Detected	1.3e-07	-2.47725	Compromised	-0.876449	Compromised	-1.67685	0.260829	5.64	15.2	1.59	4.16	A_33_P3212052	Unknown
A_33_P3212316	-0.297442	Detected	0.297442	Detected	0	-0.08989	Detected	-0.124574	Detected	-0.107232	0.753372	26	38.7	28.5	24	A_33_P3212316	Unknown
A_33_P3212700	-0.000671387	Detected	0.000671387	Detected	0	-0.22162	Detected	-0.125189	Detected	-0.173404	0.0693763	22.1	21.8	18	16.6	A_33_P3212700	Unknown
A_33_P3212704	-0.0763104	Detected	0.0763104	Detected	0	0.0866797	Detected	-0.0847399	Detected	0.00096989	0.994024	39.8	43.6	42.3	32.4	A_33_P3212704	Unknown
A_33_P3213134	0.0242999	Detected	-0.0242999	Detected	0	-0.0632565	Detected	0.0329993	Detected	-0.0151286	0.805377	891	849	796	734	A_33_P3213134	Unknown
A_33_P3213311	-0.0547495	Compromised	0.0547495	Compromised	0	0.472226	Compromised	0.216917	Compromised	0.344572	0.131253	1.74	1.85	2.38	1.72	A_33_P3213311	Unknown
A_33_P3213317	0.180636	Detected	-0.180636	Detected	-1.2e-07	-0.0397189	Detected	-0.482975	Detected	-0.261347	0.457173	18.9	14.5	15.4	9.77	A_33_P3213317	Unknown
A_33_P3213518	-0.24736	Compromised	0.24736	Compromised	0	0.676498	Compromised	-0.0802007	Compromised	0.298149	0.577323	2.11	2.93	3.8	1.94	A_33_P3213518	Unknown
A_33_P3213526	0.808042	Compromised	-0.808042	Compromised	0	-0.940965	Compromised	-0.622751	Compromised	-0.781858	0.442637	5.63	1.81	1.59	1.71	A_33_P3213526	Unknown
A_33_P3213712	-0.0823658	Detected	0.0823658	Detected	0	-0.0611312	Detected	-0.360222	Detected	-0.210677	0.342535	19.1	21.1	18.4	12.9	A_33_P3213712	Unknown
A_33_P3213992	-0.651316	Compromised	0.651316	Compromised	2.35e-07	-1.79861	Compromised	0.346733	Compromised	-0.725937	0.621407	4.06	9.87	1.74	6.64	A_33_P3213992	Unknown
A_33_P3214076	0.37971	Compromised	-0.37971	Compromised	0	-0.565423	Compromised	-0.265196	Compromised	-0.415309	0.416104	3.59	2.09	1.77	1.88	A_33_P3214076	Unknown
A_33_P3214179	0.0323997	Detected	-0.0323997	Detected	0	-0.36643	Detected	0.00680971	Detected	-0.17981	0.44266	22.5	21.2	16.2	18.1	A_33_P3214179	Unknown
A_33_P3214284	-0.0223885	Compromised	0.0223889	Compromised	2.385e-07	0.670077	Compromised	0.810505	Compromised	0.740291	0.00976558	5.43	5.52	8.33	7.92	A_33_P3214284	Unknown
A_33_P3214750	-0.0555019	Compromised	0.0555015	Compromised	-2.39e-07	-0.0763249	Compromised	0.241256	Compromised	0.0824654	0.672462	1.71	1.82	1.6	1.72	A_33_P3214750	Unknown
A_33_P3214782	-1.5915	Compromised	1.5915	Detected	0	-1.64992	Compromised	-1.32726	Compromised	-1.48859	0.450314	1.81	16.2	1.65	1.78	A_33_P3214782	Unknown
A_33_P3215232	-0.923805	Compromised	0.923805	Compromised	2.4e-07	1.21199	Compromised	1.08336	Compromised	1.14768	0.340924	1.92	6.81	8.01	6.32	A_33_P3215232	Unknown
A_33_P3215363	0.252934	Detected	-0.252935	Detected	-1.2e-07	0.14459	Detected	0.486418	Detected	0.315504	0.409956	13.4	9.3	11.8	12.9	A_33_P3215363	Unknown
A_33_P3215527	-0.35427	Compromised	0.35427	Compromised	0	-0.39255	Compromised	-0.0998716	Compromised	-0.246211	0.586457	1.72	2.77	1.59	1.68	A_33_P3215527	Unknown
A_33_P3215565	0.0902863	Compromised	-0.0902863	Compromised	0	1.14008	Compromised	-0.049006	Compromised	0.545535	0.46007	2.3	2	4.52	1.71	A_33_P3215565	Unknown
A_33_P3215611	-0.0663147	Compromised	0.0663152	Compromised	2.37e-07	1.63426	Compromised	0.656868	Compromised	1.14556	0.145852	1.99	2.15	6.14	2.69	A_33_P3215611	Unknown
A_33_P3215729	-0.0294647	Compromised	0.0294647	Compromised	0	-0.0995612	Compromised	0.188107	Compromised	0.0442731	0.791464	1.88	1.93	1.7	1.79	A_33_P3215729	Unknown
A_33_P3216200	0.0834954	Detected	-0.0834956	Compromised	-1.2e-07	-0.595333	Compromised	-0.346339	Compromised	-0.470836	0.0881649	9.41	8.26	5.58	5.72	A_33_P3216200	Unknown
A_33_P3216487	0.0888591	Detected	-0.0888591	Detected	0	-0.0201392	Detected	-0.345547	Detected	-0.182843	0.427969	101	88	88.9	61.2	A_33_P3216487	Unknown
A_33_P3216621	0.239807	Compromised	-0.239807	Compromised	0	-0.695239	Compromised	0.0322385	Compromised	-0.3315	0.526196	8.56	6.05	4.25	6.07	A_33_P3216621	Unknown
A_33_P3216635	-0.0613737	Compromised	0.0613739	Compromised	1.2e-07	0.292535	Detected	0.460247	Detected	0.376391	0.0684853	8.49	9.11	10.3	9.98	A_33_P3216635	Unknown
A_33_P3216640	-0.0499587	Compromised	0.0499582	Compromised	-2.38e-07	-0.101862	Compromised	0.205597	Compromised	0.0518672	0.778731	1.78	1.88	1.63	1.74	A_33_P3216640	Unknown
A_33_P3217507	-0.0433245	Compromised	0.0433249	Compromised	2.385e-07	-0.081605	Compromised	0.533001	Compromised	0.225698	0.542679	1.72	1.8	1.59	2.1	A_33_P3217507	Unknown
A_33_P3217629	-0.0444384	Compromised	0.0444388	Compromised	2.39e-07	-0.081603	Compromised	0.220575	Compromised	0.0694859	0.702175	1.87	1.96	1.73	1.84	A_33_P3217629	Unknown
A_33_P3217867	-0.0552483	Compromised	0.0552483	Compromised	0	1.58511	Compromised	0.24146	Compromised	0.913285	0.308215	1.72	1.83	5.09	1.73	A_33_P3217867	Unknown
A_33_P3218013	-0.0763836	Detected	0.0763836	Detected	0	-0.699867	Detected	-0.525004	Compromised	-0.612435	0.0341079	13.6	14.9	8.38	8.16	A_33_P3218013	Unknown
A_33_P3218118	0.0197399	Detected	-0.0197399	Detected	0	0.125261	Detected	0.148009	Detected	0.136635	0.0266932	65.7	63	67.1	58.8	A_33_P3218118	Unknown
A_33_P3218258	-0.0246749	Compromised	0.0246754	Compromised	2.39e-07	-0.132051	Compromised	0.190422	Compromised	0.0291851	0.874483	2.02	2.06	1.78	1.92	A_33_P3218258	Unknown
A_33_P3218309	0.62694	Compromised	-0.62694	Compromised	-2.25e-07	-0.750818	Compromised	-0.441649	Compromised	-0.596234	0.453295	4.38	1.81	1.6	1.71	A_33_P3218309	Unknown
A_33_P3218491	-0.67677	Compromised	0.676769	Compromised	-2.35e-07	-0.943588	Compromised	0.533389	Compromised	-0.205099	0.856712	2.18	5.49	1.72	4.13	A_33_P3218491	Unknown
A_33_P3218504	-0.171012	Compromised	0.171012	Compromised	-2.4e-07	0.157845	Compromised	0.57808	Compromised	0.367963	0.307314	5.98	7.47	7.13	8.23	A_33_P3218504	Unknown
A_33_P3218564	0.125779	Detected	-0.125779	Detected	2.35e-07	-0.256164	Detected	-0.0041008	Detected	-0.130132	0.540895	15100	12500	11000	11300	A_33_P3218564	Unknown
A_33_P3218741	0.0108967	Detected	-0.0108972	Detected	-2.385e-07	0.113877	Detected	0.420662	Detected	0.267269	0.224341	20500	19900	20900	22300	A_33_P3218741	Unknown
A_33_P3218910	0.227336	Compromised	-0.227336	Compromised	0	-0.374554	Compromised	-0.0774088	Compromised	-0.225981	0.492885	2.67	1.92	1.67	1.77	A_33_P3218910	Unknown
A_33_P3219138	0.225726	Compromised	-0.225726	Compromised	0	-0.323991	Compromised	1.19901	Detected	0.437507	0.637055	7.34	5.29	4.76	11.8	A_33_P3219138	Unknown
A_33_P3219210	-0.396826	Compromised	0.396825	Compromised	-2.5e-07	-0.0191612	Compromised	0.113912	Compromised	0.0473754	0.91703	3.6	6.15	4.44	4.2	A_33_P3219210	Unknown
A_33_P3219286	0.0574305	Detected	-0.0574305	Detected	0	-0.452431	Detected	0.1016	Detected	-0.175415	0.598459	45.6	41.5	30.4	38.5	A_33_P3219286	Unknown
A_33_P3219454	0.0299292	Detected	-0.0299296	Detected	-2.385e-07	-0.0913663	Detected	-0.048048	Detected	-0.0697072	0.199819	16500	15600	14400	12800	A_33_P3219454	Unknown
A_33_P3219505	-0.0508399	Compromised	0.0508399	Compromised	0	-0.0877652	Compromised	0.220827	Compromised	0.0665307	0.721846	1.74	1.84	1.61	1.72	A_33_P3219505	Unknown
A_33_P3220213	-0.0105309	Compromised	0.0105305	Compromised	-2.385e-07	0.453746	Compromised	1.02208	Compromised	0.737915	0.121931	1.97	1.97	2.58	3.3	A_33_P3220213	Unknown
A_33_P3220395	-0.0473213	Compromised	0.0473208	Compromised	-2.385e-07	-0.0856018	Compromised	0.207077	Compromised	0.0607374	0.731044	1.72	1.81	1.59	1.68	A_33_P3220395	Unknown
A_33_P3220406	0.618368	Compromised	-0.618368	Compromised	0	-0.756973	Compromised	-0.0867438	Compromised	-0.421859	0.609545	4.4	1.84	1.61	2.21	A_33_P3220406	Unknown
A_33_P3220678	0.480304	Compromised	-0.480303	Compromised	2.3e-07	-0.604409	Compromised	-0.334581	Compromised	-0.469495	0.446006	3.91	1.98	1.75	1.82	A_33_P3220678	Unknown
A_33_P3220748	0.846961	Compromised	-0.846961	Compromised	0	-1.06301	Compromised	-0.775341	Compromised	-0.919175	0.396655	6.73	2.05	1.7	1.79	A_33_P3220748	Unknown
A_33_P3220780	0.736093	Compromised	-0.736093	Compromised	0	0.325767	Compromised	-0.557743	Compromised	-0.115988	0.904896	5.18	1.84	3.7	1.73	A_33_P3220780	Unknown
A_33_P3220847	-0.0405912	Compromised	0.0405912	Compromised	0	-0.119199	Compromised	0.176981	Compromised	0.0288908	0.86812	1.88	1.96	1.69	1.79	A_33_P3220847	Unknown
A_33_P3220979	-0.0469089	Compromised	0.0469089	Compromised	0	0.624168	Compromised	0.233121	Compromised	0.428644	0.166692	1.74	1.83	2.63	1.73	A_33_P3220979	Unknown
A_33_P3220994	0.167865	Detected	-0.167866	Detected	-1.15e-07	-0.0830197	Detected	-0.908909	Compromised	-0.495964	0.381678	17.8	13.9	14.2	6.91	A_33_P3220994	Unknown
A_33_P3221040	0.890252	Compromised	-0.890252	Compromised	0	-0.49553	Compromised	-0.779472	Compromised	-0.637501	0.552762	7.46	2.14	2.71	1.92	A_33_P3221040	Unknown
A_33_P3221059	-0.661812	Compromised	0.661812	Compromised	0	0.722336	Compromised	0.46111	Compromised	0.591723	0.472903	1.8	4.44	4.46	3.21	A_33_P3221059	Unknown
A_33_P3221134	-0.0249581	Compromised	0.0249581	Compromised	0	0.838639	Compromised	1.32752	Compromised	1.08308	0.0478061	1.98	2.02	3.42	4.14	A_33_P3221134	Unknown
A_33_P3221318	-0.279328	Compromised	0.279328	Compromised	0	-0.930052	Compromised	-0.726086	Compromised	-0.828069	0.10839	5.16	7.49	3.12	3.1	A_33_P3221318	Unknown
A_33_P3221384	-0.239676	Detected	0.239676	Detected	0	-0.164575	Detected	0.104046	Detected	-0.0302644	0.922344	23	31.6	23	23.9	A_33_P3221384	Unknown
A_33_P3221793	-0.20796	Detected	0.20796	Detected	0	-0.19426	Detected	0.606268	Detected	0.206004	0.692687	21.6	28.4	20.7	31.1	A_33_P3221793	Unknown
A_33_P3221888	-0.0992723	Compromised	0.099272	Compromised	-1.2e-07	-1.73514	Compromised	-1.03157	Compromised	-1.38336	0.063264	8.25	9.33	2.52	3.54	A_33_P3221888	Unknown
A_33_P3221925	-0.0105305	Compromised	0.0105309	Compromised	2.385e-07	0.900184	Compromised	0.146218	Compromised	0.523201	0.299713	1.95	1.95	3.48	1.78	A_33_P3221925	Unknown
A_33_P3221978	0.00145864	Detected	-0.00145864	Detected	0	-0.0736823	Detected	-0.49007	Detected	-0.281876	0.30847	18.2	17.9	16.4	10.6	A_33_P3221978	Unknown
A_33_P3221980	-0.0218115	Detected	0.021812	Detected	2.385e-07	-0.0379672	Detected	0.0893269	Detected	0.0256798	0.739436	5710	5800	5360	5050	A_33_P3221980	Unknown
A_33_P3222196	-0.0512953	Compromised	0.0512958	Compromised	2.385e-07	-0.0805306	Compromised	0.23705	Compromised	0.0782597	0.685234	1.72	1.82	1.6	1.72	A_33_P3222196	Unknown
A_33_P3222354	0.242087	Compromised	-0.242087	Compromised	0	-0.0833497	Compromised	-0.087697	Compromised	-0.0855234	0.757653	2.64	1.86	2	1.72	A_33_P3222354	Unknown
A_33_P3222524	-0.154204	Compromised	0.154204	Compromised	0	-1.53913	Compromised	0.00515413	Compromised	-0.766987	0.432753	6.08	7.42	2.21	5.56	A_33_P3222524	Unknown
A_33_P3222529	0.276175	Compromised	-0.276175	Compromised	0	-0.390335	Compromised	-0.154007	Compromised	-0.272171	0.460542	3.11	2.09	1.86	1.89	A_33_P3222529	Unknown
A_33_P3222600	0.0418181	Detected	-0.0418181	Detected	0	0.21453	Detected	-0.269299	Detected	-0.0273843	0.921371	30	27.9	32.1	19.8	A_33_P3222600	Unknown
A_33_P3222664	-0.116113	Detected	0.116113	Detected	0	0.0701578	Detected	0.0416091	Detected	0.0558834	0.679987	774	896	836	707	A_33_P3222664	Unknown
A_33_P3223111	-0.188369	Compromised	0.188369	Compromised	-1.15e-07	0.640671	Detected	-0.546016	Compromised	0.0473274	0.94632	6.76	8.65	11.4	4.32	A_33_P3223111	Unknown
A_33_P3223142	-0.185295	Compromised	0.185295	Compromised	0	-0.866767	Compromised	-0.37163	Compromised	-0.619199	0.183181	3.21	4.09	1.9	2.31	A_33_P3223142	Unknown
A_33_P3223663	-0.0449619	Compromised	0.0449615	Compromised	-2.39e-07	-0.399937	Compromised	-0.0865817	Compromised	-0.243259	0.274141	2.25	2.36	1.67	1.79	A_33_P3223663	Unknown
A_33_P3223712	-0.0461116	Compromised	0.0461111	Compromised	-2.385e-07	-0.0717044	Compromised	0.234106	Compromised	0.0812008	0.66168	1.78	1.87	1.66	1.77	A_33_P3223712	Unknown
A_33_P3223860	0.412591	Compromised	-0.412591	Compromised	2.4e-07	-0.543334	Compromised	0.126895	Compromised	-0.208219	0.733057	3.29	1.83	1.61	2.21	A_33_P3223860	Unknown
A_33_P3224050	-0.798545	Compromised	0.798545	Compromised	0	-0.571441	Compromised	-1.02477	Compromised	-0.798107	0.437769	2.7	8.05	3	1.89	A_33_P3224050	Unknown
A_33_P3224285	-0.0560231	Compromised	0.0560231	Compromised	0	-2.06739	Compromised	-1.77168	Compromised	-1.91953	0.00671646	7.22	7.69	1.7	1.8	A_33_P3224285	Unknown
A_33_P3224715	0.105265	Compromised	-0.105265	Compromised	-2.4e-07	-0.318573	Compromised	-0.0296011	Compromised	-0.174087	0.432855	2.36	2.01	1.67	1.76	A_33_P3224715	Unknown
A_33_P3224780	-0.0399146	Compromised	0.0399146	Compromised	0	-0.0493197	Compromised	-0.972909	Compromised	-0.511115	0.385106	4.57	4.76	4.31	1.96	A_33_P3224780	Unknown
A_33_P3224971	0.0931394	Detected	-0.0931394	Detected	0	0.0442097	Detected	-0.276262	Detected	-0.116026	0.595222	874	757	802	554	A_33_P3224971	Unknown
A_33_P3225128	-0.045917	Compromised	0.0459175	Compromised	2.38e-07	-0.0795922	Compromised	0.226218	Compromised	0.073313	0.691165	1.79	1.88	1.66	1.77	A_33_P3225128	Unknown
A_33_P3225572	-0.0965073	Detected	0.0965073	Detected	0	0.244669	Detected	0.567538	Detected	0.406104	0.163463	1580	1780	1900	2050	A_33_P3225572	Unknown
A_33_P3225983	0.140993	Detected	-0.140993	Detected	0	0.103446	Detected	-0.5739	Detected	-0.235227	0.587059	89.2	72.3	82.5	44.5	A_33_P3225983	Unknown
A_33_P3226105	-0.114752	Detected	0.114752	Detected	0	-0.931668	Detected	-0.524046	Detected	-0.727857	0.0896024	19.3	22.3	10.4	11.9	A_33_P3226105	Unknown
A_33_P3226228	-0.115795	Detected	0.115795	Detected	0	-0.214645	Detected	-0.0118053	Detected	-0.113225	0.538563	94.2	109	83.5	82.9	A_33_P3226228	Unknown
A_33_P3226460	-0.26914	Compromised	0.26914	Compromised	0	-0.564191	Compromised	-0.92455	Compromised	-0.744371	0.148325	3.27	4.68	2.53	1.7	A_33_P3226460	Unknown
A_33_P3226565	-0.00580072	Detected	0.00580072	Detected	0	0.212792	Detected	0.11262	Detected	0.162706	0.0840954	153	152	169	136	A_33_P3226565	Unknown
A_33_P3226675	0.0669565	Compromised	-0.066957	Compromised	-2.4e-07	-0.186565	Compromised	0.10026	Compromised	-0.0431526	0.810697	2.16	1.94	1.72	1.81	A_33_P3226675	Unknown
A_33_P3226680	-0.122938	Compromised	0.122938	Compromised	1.195e-07	0.213625	Detected	0.483937	Detected	0.348781	0.196472	7.65	8.94	9.17	9.54	A_33_P3226680	Unknown
A_33_P3226788	-0.0412312	Detected	0.0412312	Detected	0	0.0516815	Detected	-0.118018	Detected	-0.0331681	0.758732	161	168	163	125	A_33_P3226788	Unknown
A_33_P3226800	-0.577816	Compromised	0.577816	Compromised	0	0.312678	Compromised	-0.30568	Compromised	0.00349904	0.996225	1.79	3.93	3.15	1.77	A_33_P3226800	Unknown
A_33_P3227010	-0.0776813	Detected	0.0776815	Detected	1.2e-07	0.00473261	Detected	0.472721	Detected	0.238727	0.435061	9.84	10.8	9.89	11.8	A_33_P3227010	Unknown
A_33_P3227212	-0.2176	Compromised	0.2176	Detected	0	-0.522628	Compromised	-0.137641	Compromised	-0.330135	0.373634	8.03	10.7	6.17	6.95	A_33_P3227212	Unknown
A_33_P3227225	-0.0440879	Detected	0.0440879	Detected	0	-0.643529	Detected	0.204457	Detected	-0.219536	0.657819	14.7	15.4	9.21	14.3	A_33_P3227225	Unknown
A_33_P3227260	0.560057	Compromised	-0.560057	Compromised	0	-0.685242	Compromised	-0.42691	Compromised	-0.556076	0.435366	4.72	2.14	1.89	1.95	A_33_P3227260	Unknown
A_33_P3227300	-0.0467873	Compromised	0.0467868	Compromised	-2.385e-07	-0.071753	Compromised	0.188539	Compromised	0.0583932	0.713922	1.94	2.04	1.81	1.87	A_33_P3227300	Unknown
A_33_P3227457	0.160041	Detected	-0.160041	Detected	0	0.021208	Detected	-0.142953	Detected	-0.0608726	0.767258	907	716	782	602	A_33_P3227457	Unknown
A_33_P3227556	-0.0784891	Detected	0.0784891	Detected	0	0.171699	Detected	-0.242503	Detected	-0.0354021	0.887687	99.2	109	112	72.5	A_33_P3227556	Unknown
A_33_P3227703	0.0703905	Detected	-0.0703905	Detected	0	-0.0510185	Detected	0.316703	Detected	0.132842	0.569379	80.1	71.6	69.9	77.8	A_33_P3227703	Unknown
A_33_P3228212	0.0353656	Compromised	-0.0353656	Compromised	0	-1.21311	Compromised	-0.911917	Compromised	-1.06251	0.0205459	4.38	4.11	1.75	1.86	A_33_P3228212	Unknown
A_33_P3228402	0.581855	Compromised	-0.581855	Compromised	0	0.541956	Compromised	0.643672	Compromised	0.592814	0.416933	7.57	3.33	6.99	6.47	A_33_P3228402	Unknown
A_33_P3228499	0.113819	Compromised	-0.113819	Compromised	-2.375e-07	-0.606139	Compromised	-1.03988	Compromised	-0.823009	0.078302	7.01	5.9	4.04	2.58	A_33_P3228499	Unknown
A_33_P3228533	-0.017817	Compromised	0.017817	Compromised	0	-0.189728	Compromised	0.107908	Compromised	-0.04091	0.810493	1.97	1.99	1.66	1.76	A_33_P3228533	Unknown
A_33_P3228543	0.192184	Compromised	-0.192184	Compromised	0	-1.2304	Compromised	-0.912189	Compromised	-1.0713	0.0501914	4.49	3.39	1.59	1.71	A_33_P3228543	Unknown
A_33_P3228603	-0.0457253	Compromised	0.0457253	Compromised	0	-0.0787725	Compromised	0.226501	Compromised	0.073864	0.688516	1.8	1.89	1.67	1.78	A_33_P3228603	Unknown
A_33_P3228828	-0.0515485	Compromised	0.0515485	Compromised	0	-0.0798249	Compromised	0.197908	Compromised	0.0590415	0.728722	1.88	1.99	1.75	1.83	A_33_P3228828	Unknown
A_33_P3228868	0.463604	Detected	-0.463604	Compromised	1.15e-07	-0.507838	Compromised	0.291945	Detected	-0.107947	0.876285	12.6	6.53	6.1	9.16	A_33_P3228868	Unknown
A_33_P3229012	0.0963485	Detected	-0.0963485	Detected	0	0.17145	Detected	0.0642931	Detected	0.117872	0.396925	47.2	40.7	47.2	37.8	A_33_P3229012	Unknown
A_33_P3229022	-0.000274658	Detected	0.000274181	Detected	-2.38415e-07	-0.0454679	Detected	0.0685034	Detected	0.0115178	0.858518	4250	4190	3910	3650	A_33_P3229022	Unknown
A_33_P3229037	-0.0422821	Compromised	0.0422821	Compromised	0	-0.0953369	Compromised	0.18717	Compromised	0.0459163	0.784951	2	2.09	1.83	1.92	A_33_P3229037	Unknown
A_33_P3229390	-0.0385478	Detected	0.0385478	Detected	0	-0.0594156	Detected	-0.331599	Detected	-0.195507	0.301032	1010	1050	945	675	A_33_P3229390	Unknown
A_33_P3229527	-0.062077	Detected	0.062077	Detected	0	-0.326826	Detected	-0.744348	Detected	-0.535587	0.133126	243	261	192	124	A_33_P3229527	Unknown
A_33_P3229577	0.268467	Detected	-0.268467	Detected	-1.25e-07	0.22051	Detected	0.0383453	Detected	0.129428	0.692789	15.9	10.8	14.6	11.1	A_33_P3229577	Unknown
A_33_P3229587	0.0886335	Detected	-0.0886335	Detected	0	-0.441219	Detected	-0.376255	Detected	-0.408737	0.0494177	32.7	28.5	21.5	19.4	A_33_P3229587	Unknown
A_33_P3229678	-0.0173681	Detected	0.0173683	Detected	1.195e-07	-0.418108	Compromised	-0.8795	Compromised	-0.648804	0.107106	10.5	10.6	7.55	4.73	A_33_P3229678	Unknown
A_33_P3229754	-0.0469089	Compromised	0.0469089	Compromised	0	-0.092823	Compromised	0.233121	Compromised	0.0701489	0.719273	1.74	1.83	1.6	1.73	A_33_P3229754	Unknown
A_33_P3229760	-0.556697	Compromised	0.556696	Compromised	-2.5e-07	-0.593622	Compromised	-0.301904	Compromised	-0.447763	0.517967	1.74	3.71	1.61	1.7	A_33_P3229760	Unknown
A_33_P3229789	-0.0308516	Detected	0.0308516	Detected	0	-0.107754	Detected	-0.180628	Detected	-0.144191	0.0943741	21	21.6	18.9	15.5	A_33_P3229789	Unknown
A_33_P3229958	-0.0594544	Compromised	0.0594544	Compromised	0	-0.0802774	Compromised	0.237303	Compromised	0.0785129	0.688829	1.71	1.83	1.6	1.72	A_33_P3229958	Unknown
A_33_P3230048	-0.37142	Compromised	0.37142	Compromised	0	0.291159	Compromised	0.184986	Compromised	0.238073	0.590637	1.91	3.15	2.87	2.3	A_33_P3230048	Unknown
A_33_P3230578	0.388563	Compromised	-0.388564	Compromised	-2.35e-07	-0.516044	Compromised	-0.149991	Compromised	-0.333017	0.519261	3.53	2.03	1.79	1.99	A_33_P3230578	Unknown
A_33_P3230676	0.0954246	Detected	-0.0954249	Detected	-1.2e-07	-2.64587	Compromised	-1.51669	Compromised	-2.08128	0.0680538	11.2	9.67	1.59	3	A_33_P3230676	Unknown
A_33_P3231005	0.0332003	Detected	-0.0332007	Detected	-2.38e-07	0.094089	Detected	-0.102952	Detected	-0.00443148	0.969875	10200	9600	10100	7600	A_33_P3231005	Unknown
A_33_P3231342	0.469812	Compromised	-0.469813	Compromised	-2.35e-07	-0.606204	Compromised	-0.149231	Compromised	-0.377717	0.544797	3.62	1.86	1.63	1.93	A_33_P3231342	Unknown
A_33_P3231437	0.647256	Compromised	-0.647255	Compromised	2.5e-07	-0.779082	Compromised	-0.469913	Compromised	-0.624498	0.447081	4.53	1.82	1.6	1.71	A_33_P3231437	Unknown
A_33_P3231562	0.373861	Compromised	-0.373861	Compromised	0	-1.11841	Compromised	-0.0965586	Compromised	-0.607482	0.438542	4.89	2.87	1.65	2.89	A_33_P3231562	Unknown
A_33_P3231677	-0.0986922	Detected	0.0986922	Detected	0	-0.0128109	Detected	0.391287	Detected	0.189238	0.488619	40	45.2	40.3	46	A_33_P3231677	Unknown
A_33_P3231761	-0.146983	Compromised	0.146983	Compromised	0	-1.40874	Compromised	-1.12233	Compromised	-1.26554	0.0253002	4.37	5.28	1.73	1.82	A_33_P3231761	Unknown
A_33_P3231833	-0.00895047	Detected	0.00895047	Detected	0	0.0470841	Detected	0.214834	Detected	0.130959	0.260726	457	456	451	437	A_33_P3231833	Unknown
A_33_P3232544	0.0134437	Detected	-0.0134437	Detected	0	0.217645	Detected	0.37085	Detected	0.294248	0.0633002	673	651	736	706	A_33_P3232544	Unknown
A_33_P3232643	-0.0591011	Compromised	0.0591016	Compromised	2.375e-07	-0.0728092	Compromised	0.192903	Compromised	0.0600467	0.719705	2.01	2.15	1.89	1.96	A_33_P3232643	Unknown
A_33_P3232742	0.766922	Compromised	-0.766922	Compromised	2.5e-07	1.27029	Compromised	0.0451078	Compromised	0.657698	0.571824	5.7	1.94	7.67	2.83	A_33_P3232742	Unknown
A_33_P3233000	0.0973337	Detected	-0.0973337	Detected	0	0.00251031	Detected	-0.391928	Detected	-0.194709	0.469381	28.8	24.8	25.6	16.8	A_33_P3233000	Unknown
A_33_P3233085	-0.193732	Compromised	0.193732	Compromised	-2.4e-07	-1.71962	Compromised	-0.995842	Compromised	-1.35773	0.0805185	5.43	7	1.79	2.55	A_33_P3233085	Unknown
A_33_P3233100	0.330498	Detected	-0.330498	Compromised	0	0.171134	Detected	-0.234637	Compromised	-0.0317513	0.942203	11.6	7.23	9.86	6.42	A_33_P3233100	Unknown
A_33_P3233229	-0.0435753	Compromised	0.0435753	Compromised	0	-0.127172	Compromised	1.13148	Compromised	0.502156	0.509494	1.92	2.01	1.72	3.55	A_33_P3233229	Unknown
A_33_P3233318	-0.127764	Compromised	0.127763	Detected	-1.2e-07	0.168128	Detected	-0.277591	Compromised	-0.0547312	0.851027	9.01	10.6	10.5	6.65	A_33_P3233318	Unknown
A_33_P3233546	-0.0363617	Compromised	0.0363617	Compromised	0	-0.136832	Compromised	0.158874	Compromised	0.0110211	0.948883	1.92	1.99	1.7	1.8	A_33_P3233546	Unknown
A_33_P3233731	0.0891943	Compromised	-0.0891938	Compromised	2.4e-07	0.162394	Compromised	0.160522	Compromised	0.161458	0.211993	7.59	6.61	7.58	6.53	A_33_P3233731	Unknown
A_33_P3233953	0.0953026	Detected	-0.0953031	Detected	-2.4e-07	-0.0736842	Detected	-0.172384	Detected	-0.123034	0.370285	4690	4050	3960	3190	A_33_P3233953	Unknown
A_33_P3234108	-0.051527	Compromised	0.0515275	Compromised	2.385e-07	-0.07235	Compromised	0.228357	Compromised	0.0780034	0.672148	1.71	1.81	1.6	1.7	A_33_P3234108	Unknown
A_33_P3234377	0.0522347	Detected	-0.0522351	Detected	-2.38e-07	-0.357646	Detected	-0.179091	Detected	-0.268368	0.121963	6480	5940	4630	4520	A_33_P3234377	Unknown
A_33_P3234402	-0.0600138	Compromised	0.0600138	Compromised	0	1.42156	Compromised	0.236843	Compromised	0.829203	0.298333	1.69	1.81	4.48	1.7	A_33_P3234402	Unknown
A_33_P3234442	-0.0570855	Compromised	0.0570855	Compromised	0	-0.0729575	Compromised	0.21514	Compromised	0.0710914	0.691407	1.8	1.92	1.69	1.78	A_33_P3234442	Unknown
A_33_P3234447	-0.0366287	Compromised	0.0366287	Compromised	0	-0.113531	Compromised	0.213243	Compromised	0.0498559	0.793975	1.9	1.97	1.71	1.85	A_33_P3234447	Unknown
A_33_P3234540	-0.0105307	Detected	0.0105307	Detected	0	0.106696	Detected	0.823051	Detected	0.464874	0.324002	135	135	139	197	A_33_P3234540	Unknown
A_33_P3234814	-0.0491147	Compromised	0.0491147	Compromised	0	-0.0724168	Compromised	0.215252	Compromised	0.0714176	0.684689	1.82	1.92	1.7	1.79	A_33_P3234814	Unknown
A_33_P3235142	-0.0555019	Compromised	0.0555015	Compromised	-2.39e-07	-0.0763249	Compromised	0.232843	Compromised	0.0782592	0.680714	1.71	1.82	1.6	1.71	A_33_P3235142	Unknown
A_33_P3235162	-0.0354686	Compromised	0.0354686	Compromised	0	-0.129386	Compromised	0.193681	Compromised	0.0321476	0.86383	1.99	2.06	1.77	1.91	A_33_P3235162	Unknown
A_33_P3235360	-0.168959	Detected	0.168959	Detected	0	-0.590464	Detected	-0.0696478	Detected	-0.330056	0.39906	28.5	35.5	20.2	25	A_33_P3235360	Unknown
A_33_P3235491	-0.0830889	Detected	0.0830889	Detected	0	0.194642	Detected	-0.318067	Detected	-0.0617127	0.840152	37.8	41.8	43.5	26.3	A_33_P3235491	Unknown
A_33_P3235521	-0.0512953	Compromised	0.0512958	Compromised	2.385e-07	1.03217	Compromised	0.220176	Compromised	0.626173	0.26562	1.72	1.82	3.46	1.7	A_33_P3235521	Unknown
A_33_P3235831	0.126793	Detected	-0.126793	Detected	0	0.0745153	Detected	-0.15196	Detected	-0.0387223	0.840984	92.3	76.3	84.5	62.3	A_33_P3235831	Unknown
A_33_P3236152	-0.0495319	Compromised	0.0495319	Compromised	0	-0.080225	Compromised	0.201914	Compromised	0.0608444	0.723463	1.98	2.09	1.84	1.93	A_33_P3236152	Unknown
A_33_P3236213	0.236765	Compromised	-0.236765	Compromised	2.35e-07	0.0219374	Compromised	-0.705553	Compromised	-0.341808	0.513472	7.58	5.38	6.2	3.23	A_33_P3236213	Unknown
A_33_P3236778	0.123411	Compromised	-0.123412	Compromised	-2.375e-07	-0.806337	Compromised	0.0660315	Compromised	-0.370153	0.499971	5.96	4.95	2.97	4.69	A_33_P3236778	Unknown
A_33_P3237344	-0.080168	Detected	0.0801682	Detected	1.2e-07	-0.856968	Compromised	0.217892	Detected	-0.319538	0.61605	14.8	16.3	8.2	14.9	A_33_P3237344	Unknown
A_33_P3237605	-0.0968502	Detected	0.0968502	Detected	0	-1.23197	Detected	-0.614332	Detected	-0.92315	0.104076	23.6	26.6	10.2	13.5	A_33_P3237605	Unknown
A_33_P3237704	0.00270534	Detected	-0.00270534	Detected	0	0.120876	Detected	0.33412	Detected	0.227498	0.166548	330	324	340	340	A_33_P3237704	Unknown
A_33_P3237719	-0.259701	Detected	0.259701	Detected	0	0.327955	Detected	0.295038	Detected	0.311496	0.353933	14.3	20.2	20.4	17.2	A_33_P3237719	Unknown
A_33_P3237819	-0.444344	Compromised	0.444344	Compromised	0	-1.19449	Compromised	-0.204227	Compromised	-0.699361	0.403432	3.65	6.66	2.06	3.53	A_33_P3237819	Unknown
A_33_P3237835	-0.212414	Compromised	0.212414	Detected	0	0.362213	Detected	0.066545	Compromised	0.214379	0.494574	7.71	10.2	10.9	7.66	A_33_P3237835	Unknown
A_33_P3237905	-0.582991	Compromised	0.582991	Compromised	0	-0.142018	Compromised	0.305114	Compromised	0.0815477	0.90804	1.94	4.29	2.5	2.94	A_33_P3237905	Unknown
A_33_P3238325	0.221278	Detected	-0.221278	Detected	0	-0.762116	Detected	-0.846138	Detected	-0.804127	0.0702821	30.2	21.9	14.5	11.8	A_33_P3238325	Unknown
A_33_P3238402	0.0155449	Detected	-0.0155449	Detected	0	-0.186112	Detected	0.0977678	Detected	-0.0441721	0.786307	33.8	32.6	27.9	29.3	A_33_P3238402	Unknown
A_33_P3238611	0.0567937	Compromised	-0.0567942	Compromised	-2.385e-07	-0.186466	Compromised	0.202628	Compromised	0.00808072	0.971817	2.02	1.84	1.62	1.83	A_33_P3238611	Unknown
A_33_P3238773	-0.53879	Compromised	0.53879	Detected	0	-0.106591	Detected	-0.553007	Compromised	-0.329799	0.628712	8.51	17.7	10.9	6.9	A_33_P3238773	Unknown
A_33_P3238802	-0.0481095	Compromised	0.0481095	Compromised	0	1.25817	Compromised	0.201136	Compromised	0.729655	0.302934	1.87	1.97	4.39	1.82	A_33_P3238802	Unknown
A_33_P3238944	-0.047199	Detected	0.047199	Detected	0	-0.546039	Detected	-0.326222	Detected	-0.436131	0.0676736	32.6	34.3	21.9	22	A_33_P3238944	Unknown
A_33_P3239102	0.0449858	Detected	-0.0449853	Detected	2.38e-07	-0.0915656	Detected	-0.0658569	Detected	-0.0787113	0.234524	5130	4750	4430	3890	A_33_P3239102	Unknown
A_33_P3239659	0.326031	Compromised	-0.326031	Compromised	0	-0.361679	Compromised	-1.00064	Compromised	-0.681161	0.274173	5.82	3.65	3.43	1.9	A_33_P3239659	Unknown
A_33_P3239714	-0.0506158	Compromised	0.0506158	Compromised	0	-0.0779972	Compromised	0.262252	Compromised	0.0921273	0.655454	1.75	1.85	1.63	1.78	A_33_P3239714	Unknown
A_33_P3239724	0.0867929	Compromised	-0.0867934	Compromised	-2.37e-07	-0.220826	Compromised	0.0723419	Compromised	-0.0742419	0.705501	2.06	1.8	1.58	1.67	A_33_P3239724	Unknown
A_33_P3239936	-0.196	Compromised	0.196	Compromised	-2.4e-07	-0.222594	Compromised	0.0306163	Compromised	-0.095989	0.720688	1.91	2.47	1.78	1.83	A_33_P3239936	Unknown
A_33_P3239989	0.0429268	Compromised	-0.0429268	Compromised	0	0.701643	Detected	0.284034	Compromised	0.492838	0.146942	7.14	6.63	10.7	6.91	A_33_P3239989	Unknown
A_33_P3240078	-0.438624	Compromised	0.438624	Detected	0	0.242277	Compromised	0.0678058	Compromised	0.155041	0.761908	5.27	9.54	8.02	6.13	A_33_P3240078	Unknown
A_33_P3240144	-0.0362301	Compromised	0.0362306	Compromised	2.385e-07	-0.144195	Compromised	0.554476	Compromised	0.205141	0.618259	1.93	2	1.7	2.38	A_33_P3240144	Unknown
A_33_P3240158	-0.219887	Compromised	0.219887	Compromised	0	-0.283762	Compromised	-0.0226898	Compromised	-0.153226	0.609871	1.96	2.62	1.78	1.84	A_33_P3240158	Unknown
A_33_P3240234	0.2152	Detected	-0.2152	Detected	0	-0.280741	Detected	-0.348454	Detected	-0.314598	0.285533	36.1	26.4	24.3	20	A_33_P3240234	Unknown
A_33_P3240652	-0.196255	Detected	0.196255	Detected	-1.2e-07	-0.667145	Compromised	0.0690067	Detected	-0.299069	0.547816	12.6	16.3	8.63	12.4	A_33_P3240652	Unknown
A_33_P3241043	0.0913105	Detected	-0.0913105	Detected	0	-0.17157	Detected	-0.074666	Detected	-0.123118	0.355822	88099.9	76499.9	69700	64300	A_33_P3241043	Unknown
A_33_P3241046	0.704045	Compromised	-0.704046	Compromised	-2.5e-07	-1.39782	Compromised	0.0571313	Compromised	-0.670344	0.575966	7.19	2.67	1.59	3.76	A_33_P3241046	Unknown
A_33_P3241150	-0.322818	Compromised	0.322818	Compromised	-2.4e-07	-0.0117083	Compromised	0.468936	Compromised	0.228614	0.627269	4.67	7.2	5.5	6.62	A_33_P3241150	Unknown
A_33_P3241184	0.191002	Detected	-0.191002	Detected	0	-0.022402	Detected	0.938779	Detected	0.458188	0.469098	160	121	131	220	A_33_P3241184	Unknown
A_33_P3241596	0.0354583	Detected	-0.0354583	Detected	0	0.271025	Detected	-0.09501	Detected	0.0880074	0.683358	1020	957	1140	763	A_33_P3241596	Unknown
A_33_P3242039	-0.193705	Detected	0.193705	Detected	0	-0.425713	Detected	-0.145594	Detected	-0.285653	0.354568	33.9	43.7	27.4	28.7	A_33_P3242039	Unknown
A_33_P3242062	-0.154397	Compromised	0.154397	Compromised	0	0.311163	Compromised	0.400228	Compromised	0.355696	0.157306	2.22	2.71	2.91	2.67	A_33_P3242062	Unknown
A_33_P3242416	0.0669372	Detected	-0.0669372	Detected	0	-0.234591	Detected	-0.497998	Detected	-0.366294	0.13137	38.3	34.4	29.5	21.2	A_33_P3242416	Unknown
A_33_P3242753	-0.0391026	Compromised	0.0391026	Compromised	0	-0.142147	Compromised	0.151268	Compromised	0.00456071	0.978764	1.98	2.06	1.75	1.85	A_33_P3242753	Unknown
A_33_P3242814	-0.355361	Compromised	0.355361	Compromised	0	-0.393153	Compromised	-0.0983796	Compromised	-0.245766	0.588331	1.86	3	1.72	1.82	A_33_P3242814	Unknown
A_33_P3243343	-0.0122433	Detected	0.0122437	Detected	2.385e-07	0.0679946	Detected	0.200384	Detected	0.134189	0.184408	8410	8430	8440	7980	A_33_P3243343	Unknown
A_33_P3243600	0.177544	Compromised	-0.177544	Compromised	0	0.661757	Compromised	-0.00541687	Compromised	0.32817	0.476716	2.44	1.88	3.24	1.76	A_33_P3243600	Unknown
A_33_P3244157	-0.243619	Compromised	0.243619	Compromised	0	-0.376113	Compromised	-0.079453	Compromised	-0.227783	0.50828	1.94	2.68	1.68	1.78	A_33_P3244157	Unknown
A_33_P3244269	0.248834	Detected	-0.248834	Detected	1.2e-07	-0.311774	Detected	-0.293111	Compromised	-0.302443	0.348465	14.9	10.4	9.59	8.38	A_33_P3244269	Unknown
A_33_P3244361	-0.032728	Detected	0.032728	Detected	0	-0.21616	Detected	-0.176046	Detected	-0.196103	0.0362434	1280	1320	1070	949	A_33_P3244361	Unknown
A_33_P3244651	-0.044796	Compromised	0.0447965	Compromised	2.385e-07	-0.108759	Compromised	0.195983	Compromised	0.0436122	0.809388	1.85	1.94	1.68	1.79	A_33_P3244651	Unknown
A_33_P3244834	-0.394557	Compromised	0.394557	Compromised	0	0.557608	Compromised	0.130394	Compromised	0.344001	0.523388	2.02	3.44	3.71	2.38	A_33_P3244834	Unknown
A_33_P3245021	-0.329535	Compromised	0.329535	Compromised	2.4e-07	-0.381439	Compromised	-0.0493174	Compromised	-0.215378	0.618502	1.78	2.77	1.63	1.77	A_33_P3245021	Unknown
A_33_P3245126	0.0415237	Detected	-0.0415237	Detected	0	0.230697	Detected	0.0813706	Detected	0.156034	0.209326	15.8	14.7	17.1	13.3	A_33_P3245126	Unknown
A_33_P3245133	0.0240045	Detected	-0.0240045	Detected	0	-0.0296273	Detected	-0.585771	Detected	-0.307699	0.38519	49.2	46.9	45	26.4	A_33_P3245133	Unknown
A_33_P3245620	0.0533474	Detected	-0.0533474	Detected	0	-0.0399492	Detected	-0.0733454	Detected	-0.0566473	0.417536	1180	1080	1050	885	A_33_P3245620	Unknown
A_33_P3245623	-0.279692	Compromised	0.279692	Detected	1.15e-07	-0.161345	Compromised	-1.43935	Compromised	-0.800347	0.369953	7.23	10.5	7.45	2.65	A_33_P3245623	Unknown
A_33_P3245660	-0.0517616	Compromised	0.0517616	Compromised	0	-0.0731683	Compromised	0.236584	Compromised	0.0817077	0.666451	1.7	1.8	1.59	1.7	A_33_P3245660	Unknown
A_33_P3245841	0.402919	Compromised	-0.402919	Compromised	-2.4e-07	-0.576113	Compromised	1.42986	Compromised	0.426876	0.731034	3.53	1.99	1.7	5.89	A_33_P3245841	Unknown
A_33_P3245907	0.262815	Compromised	-0.262815	Compromised	0	-0.393887	Compromised	0.802079	Compromised	0.204096	0.78426	2.79	1.91	1.68	3.32	A_33_P3245907	Unknown
A_33_P3246011	0.270409	Compromised	-0.270409	Compromised	0	-0.391455	Compromised	-0.124913	Compromised	-0.258184	0.481995	3.1	2.1	1.86	1.93	A_33_P3246011	Unknown
A_33_P3246413	0.0922613	Compromised	-0.0922613	Compromised	0	-1.2704	Compromised	0.565482	Compromised	-0.352457	0.739205	5.12	4.44	1.89	5.82	A_33_P3246413	Unknown
A_33_P3246780	-0.0354686	Compromised	0.0354686	Compromised	0	-0.162364	Compromised	0.131952	Compromised	-0.0152056	0.929148	1.99	2.06	1.73	1.83	A_33_P3246780	Unknown
A_33_P3247068	-0.0339279	Compromised	0.0339279	Compromised	0	-0.0915818	Compromised	0.197834	Compromised	0.0531261	0.754962	1.82	1.88	1.66	1.75	A_33_P3247068	Unknown
A_33_P3247072	0.373883	Compromised	-0.373883	Compromised	0	0.351209	Compromised	-0.358471	Compromised	-0.00363088	0.995019	3.51	2.06	3.28	1.73	A_33_P3247072	Unknown
A_33_P3247077	-0.0124512	Detected	0.0124516	Detected	2.385e-07	-0.211973	Detected	-0.252484	Detected	-0.232229	0.0103207	3750	3760	3100	2600	A_33_P3247077	Unknown
A_33_P3247095	-0.147469	Detected	0.147469	Detected	0	-0.426523	Detected	-0.502785	Detected	-0.464654	0.0927517	46.4	56.1	36.3	29.7	A_33_P3247095	Unknown
A_33_P3247210	-0.0702901	Detected	0.0702901	Detected	0	-0.37287	Detected	-0.210894	Detected	-0.291882	0.11263	52.1	56.6	40.1	38.7	A_33_P3247210	Unknown
A_33_P3247252	0.464757	Compromised	-0.464757	Compromised	2.35e-07	-0.316673	Compromised	-0.306114	Compromised	-0.311393	0.571872	3.73	1.93	2.06	1.79	A_33_P3247252	Unknown
A_33_P3247678	-0.142854	Detected	0.142854	Detected	-1.2e-07	-0.199459	Detected	-0.215696	Detected	-0.207578	0.283939	14.9	17.9	13.6	11.6	A_33_P3247678	Unknown
A_33_P3247689	-0.0444384	Compromised	0.0444388	Compromised	2.39e-07	-0.123914	Compromised	0.172746	Compromised	0.0244162	0.889189	1.87	1.96	1.68	1.78	A_33_P3247689	Unknown
A_33_P3247783	0.269703	Compromised	-0.269703	Compromised	0	1.20483	Compromised	-0.116076	Compromised	0.544376	0.52514	2.92	1.98	5.3	1.83	A_33_P3247783	Unknown
A_33_P3247919	-0.159515	Detected	0.159515	Detected	0	0.0911581	Detected	0.0592897	Detected	0.0752239	0.685077	17	20.9	19.2	16.2	A_33_P3247919	Unknown
A_33_P3248028	-0.369887	Compromised	0.369888	Compromised	2.4e-07	0.393554	Compromised	0.0597038	Compromised	0.226629	0.632709	1.75	2.88	2.82	1.93	A_33_P3248028	Unknown
A_33_P3248077	-0.062201	Compromised	0.0622005	Compromised	-2.385e-07	-0.185879	Compromised	0.107092	Compromised	-0.0393937	0.827589	2.02	2.17	1.76	1.86	A_33_P3248077	Unknown
A_33_P3248222	0.168245	Compromised	-0.168245	Compromised	0	-0.909091	Compromised	1.10404	Compromised	0.0974743	0.932615	3.69	2.88	1.66	5.78	A_33_P3248222	Unknown
A_33_P3248774	-0.122967	Detected	0.122967	Detected	0	-0.142135	Detected	-0.170743	Detected	-0.156439	0.333695	33.2	38.8	31.1	26.3	A_33_P3248774	Unknown
A_33_P3248939	-0.900748	Compromised	0.900747	Compromised	-2.5e-07	-0.922154	Compromised	-0.603941	Compromised	-0.763048	0.491929	1.7	5.84	1.59	1.71	A_33_P3248939	Unknown
A_33_P3248948	0.355973	Compromised	-0.355973	Compromised	2.35e-07	-0.282304	Compromised	0.426543	Compromised	0.0721197	0.898999	3.64	2.19	2.22	3.13	A_33_P3248948	Unknown
A_33_P3248997	-0.0467873	Compromised	0.0467868	Compromised	-2.385e-07	-0.0797458	Compromised	0.806552	Compromised	0.363403	0.500451	1.94	2.04	1.8	2.87	A_33_P3248997	Unknown
A_33_P3249002	0.104618	Detected	-0.104618	Detected	2.37e-07	-0.235318	Detected	-0.128384	Detected	-0.181851	0.26175	12200	10400	9150	8500	A_33_P3249002	Unknown
A_33_P3249066	0.00773215	Detected	-0.00773215	Compromised	0	-0.835827	Compromised	-1.05868	Compromised	-0.947254	0.0136205	10	9.75	5.29	3.91	A_33_P3249066	Unknown
A_33_P3249897	0.257041	Detected	-0.257041	Compromised	0	-2.3166	Compromised	-1.14889	Compromised	-1.73274	0.113022	11.1	7.66	1.77	3.43	A_33_P3249897	Unknown
A_33_P3250263	0.0473404	Compromised	-0.0473404	Compromised	0	-1.22837	Compromised	0.048296	Compromised	-0.590039	0.453942	4.54	4.19	1.78	3.72	A_33_P3250263	Unknown
A_33_P3250323	-0.0888934	Detected	0.0888934	Detected	0	1.10713	Detected	0.637948	Detected	0.872541	0.0736496	9.15	10.2	19.9	12.4	A_33_P3250323	Unknown
A_33_P3250669	-0.236927	Compromised	0.236927	Compromised	0	0.180361	Compromised	1.81438	Compromised	0.99737	0.361764	1.98	2.71	2.51	6.72	A_33_P3250669	Unknown
A_33_P3250767	-0.180122	Detected	0.180122	Detected	0	-0.0119114	Detected	0.423096	Detected	0.205592	0.542305	61.5	77.8	65.6	76.5	A_33_P3250767	Unknown
A_33_P3251209	0.0976281	Compromised	-0.0976281	Compromised	0	-0.27307	Compromised	0.0363894	Compromised	-0.11834	0.584065	2.37	2.04	1.74	1.86	A_33_P3251209	Unknown
A_33_P3251252	-0.301479	Detected	0.301479	Detected	0	-0.700819	Detected	-0.285386	Detected	-0.493103	0.310343	15.7	23.5	11.3	13	A_33_P3251252	Unknown
A_33_P3251408	-0.876889	Compromised	0.876889	Compromised	0	-0.898295	Compromised	-0.580082	Compromised	-0.739189	0.494098	1.7	5.65	1.59	1.71	A_33_P3251408	Unknown
A_33_P3251412	-0.0348673	Compromised	0.0348678	Compromised	2.385e-07	-0.164586	Compromised	0.127947	Compromised	-0.0183194	0.914168	2.04	2.11	1.77	1.87	A_33_P3251412	Unknown
A_33_P3251557	1.20389	Detected	-1.20389	Compromised	1e-07	0.69403	Compromised	-1.06012	Compromised	-0.183046	0.913429	10.5	1.95	7	1.79	A_33_P3251557	Unknown
A_33_P3251598	0.381823	Compromised	-0.381822	Compromised	2.5e-07	0.140204	Compromised	-0.498453	Compromised	-0.179124	0.753395	5.53	3.21	4.44	2.46	A_33_P3251598	Unknown
A_33_P3251868	-0.2156	Compromised	0.2156	Compromised	0	-0.893859	Compromised	-0.50247	Compromised	-0.698164	0.138655	2.95	3.92	1.75	1.98	A_33_P3251868	Unknown
A_33_P3251916	-0.265461	Compromised	0.265461	Compromised	-2.35e-07	-0.3476	Compromised	0.465106	Compromised	0.058753	0.914719	1.84	2.62	1.65	2.5	A_33_P3251916	Unknown
A_33_P3252134	-0.0338624	Detected	0.0338624	Detected	0	-0.134243	Detected	-0.0874722	Detected	-0.110857	0.114596	943	974	835	744	A_33_P3252134	Unknown
A_33_P3252191	-0.00822496	Detected	0.00822496	Detected	0	0.267175	Detected	0.0219889	Detected	0.144582	0.360391	94	93.7	108	78.6	A_33_P3252191	Unknown
A_33_P3252279	0.0136895	Compromised	-0.013689	Compromised	2.385e-07	-0.155313	Compromised	0.174027	Compromised	0.00935698	0.959992	2.12	2.05	1.79	1.94	A_33_P3252279	Unknown
A_33_P3252441	-0.275264	Detected	0.275264	Detected	0	-0.429833	Detected	-0.884483	Compromised	-0.657158	0.207006	10.6	15.3	9.04	5.69	A_33_P3252441	Unknown
A_33_P3252444	-0.0552483	Compromised	0.0552483	Compromised	0	1.29056	Compromised	0.233097	Compromised	0.761827	0.288228	1.72	1.83	4.15	1.72	A_33_P3252444	Unknown
A_33_P3252594	-0.146889	Detected	0.146889	Detected	0	-0.268185	Detected	-0.0284691	Detected	-0.148327	0.515916	49.5	59.8	43.2	44	A_33_P3252594	Unknown
A_33_P3252685	-0.0246749	Compromised	0.0246754	Compromised	2.39e-07	-0.132051	Compromised	0.190422	Compromised	0.0291851	0.874483	2.02	2.06	1.78	1.92	A_33_P3252685	Unknown
A_33_P3253124	0.568652	Compromised	-0.568652	Compromised	2.25e-07	-0.0486732	Compromised	-0.383361	Compromised	-0.216017	0.750465	4.04	1.81	2.5	1.71	A_33_P3253124	Unknown
A_33_P3253179	-0.0356579	Compromised	0.0356579	Compromised	0	-0.99874	Compromised	-1.28984	Compromised	-1.14429	0.0167211	5.36	5.55	2.61	1.84	A_33_P3253179	Unknown
A_33_P3253304	-1.50463	Compromised	1.50463	Detected	1e-07	-1.39084	Compromised	-0.32199	Compromised	-0.856417	0.645383	1.84	14.6	1.89	3.42	A_33_P3253304	Unknown
A_33_P3253420	-0.0512953	Compromised	0.0512958	Compromised	2.385e-07	-0.0805306	Compromised	0.228638	Compromised	0.0740535	0.693929	1.72	1.82	1.6	1.71	A_33_P3253420	Unknown
A_33_P3253717	-0.0341835	Compromised	0.034184	Compromised	2.39e-07	-0.102207	Compromised	0.196937	Compromised	0.0473652	0.786731	1.8	1.86	1.63	1.73	A_33_P3253717	Unknown
A_33_P3253812	0.218143	Detected	-0.218143	Detected	1.2e-07	-0.0861008	Detected	-1.32823	Compromised	-0.707164	0.395098	17.3	12.6	13.3	4.85	A_33_P3253812	Unknown
A_33_P3253832	0.0137415	Detected	-0.013741	Detected	2.385e-07	-0.115977	Detected	-0.0506668	Detected	-0.0833218	0.143007	2720	2630	2360	2130	A_33_P3253832	Unknown
A_33_P3253892	-0.0507174	Compromised	0.0507174	Compromised	0	-0.0687256	Compromised	0.191824	Compromised	0.0615494	0.702753	1.92	2.03	1.8	1.86	A_33_P3253892	Unknown
A_33_P3253902	0.372887	Detected	-0.372888	Compromised	-1.15e-07	-2.32894	Compromised	-0.247137	Compromised	-1.28804	0.3642	12.2	7.17	1.78	6.5	A_33_P3253902	Unknown
A_33_P3254375	-0.354811	Compromised	0.354811	Detected	-1.25e-07	0.302809	Detected	-0.298349	Compromised	0.00223029	0.996608	7.88	12.7	11.8	6.71	A_33_P3254375	Unknown
A_33_P3254580	-0.0434079	Compromised	0.0434079	Compromised	0	1.21402	Compromised	1.19551	Compromised	1.20477	0.00135443	1.93	2.02	4.38	3.73	A_33_P3254580	Unknown
A_33_P3254675	-0.396926	Compromised	0.396926	Compromised	0	-0.451107	Compromised	-0.00520277	Compromised	-0.228155	0.665981	1.75	2.99	1.6	1.88	A_33_P3254675	Unknown
A_33_P3254831	-0.78956	Compromised	0.78956	Detected	0	-0.162069	Detected	-0.169325	Detected	-0.165697	0.853215	8.66	25.5	12.7	10.9	A_33_P3254831	Unknown
A_33_P3255046	0.0328255	Detected	-0.032825	Detected	2.385e-07	0.00193548	Detected	0.0216103	Detected	0.0117729	0.763939	2400	2260	2230	1950	A_33_P3255046	Unknown
A_33_P3255056	0.833703	Detected	-0.833703	Compromised	1.2e-07	-0.176926	Compromised	-0.204512	Compromised	-0.190719	0.840338	15.6	4.84	7.35	6.22	A_33_P3255056	Unknown
A_33_P3255065	-0.202863	Compromised	0.202863	Compromised	0	-0.23591	Compromised	0.0693631	Compromised	-0.0832734	0.774058	1.8	2.35	1.67	1.78	A_33_P3255065	Unknown
A_33_P3255070	-0.0489092	Compromised	0.0489092	Compromised	0	-0.105803	Compromised	0.191342	Compromised	0.0427692	0.81017	1.83	1.93	1.67	1.77	A_33_P3255070	Unknown
A_33_P3255359	-0.0473213	Compromised	0.0473208	Compromised	-2.385e-07	-0.0856018	Compromised	0.215639	Compromised	0.0650184	0.720408	1.72	1.81	1.59	1.69	A_33_P3255359	Unknown
A_33_P3255677	-0.367944	Compromised	0.367944	Compromised	-1.2e-07	-1.97629	Compromised	0.309577	Compromised	-0.833359	0.559424	5.91	9.7	1.84	7.74	A_33_P3255677	Unknown
A_33_P3255824	-0.0503941	Compromised	0.0503945	Compromised	2.375e-07	-0.0948744	Compromised	0.196372	Compromised	0.0507488	0.773197	1.76	1.86	1.62	1.71	A_33_P3255824	Unknown
A_33_P3256355	-0.146227	Detected	0.146227	Detected	0	-0.109345	Detected	-0.50056	Detected	-0.304952	0.338131	45.9	55.4	44.7	29.4	A_33_P3256355	Unknown
A_33_P3256480	0.079951	Detected	-0.079951	Detected	0	-0.217606	Detected	-0.243302	Detected	-0.230454	0.104474	246	217	190	161	A_33_P3256480	Unknown
A_33_P3256565	-0.0757291	Detected	0.0757289	Detected	-1.2e-07	-0.675584	Detected	0.454374	Detected	-0.110605	0.864072	14.8	16.2	9.27	17.5	A_33_P3256565	Unknown
A_33_P3256655	-0.0374641	Compromised	0.0374641	Compromised	0	-0.110886	Compromised	0.17853	Compromised	0.0338223	0.842014	1.84	1.91	1.66	1.75	A_33_P3256655	Unknown
A_33_P3256883	0.464931	Compromised	-0.464931	Compromised	0	-0.906973	Compromised	0.261345	Compromised	-0.322814	0.70762	5.78	2.99	2.12	4.11	A_33_P3256883	Unknown
A_33_P3256888	-0.12309	Detected	0.12309	Detected	0	-0.204245	Detected	-0.630207	Detected	-0.417226	0.231957	30.2	35.3	27.1	17.4	A_33_P3256888	Unknown
A_33_P3257179	-0.0429044	Compromised	0.0429044	Compromised	0	-0.654415	Compromised	-0.523409	Compromised	-0.588912	0.0172237	6.1	6.38	3.79	3.58	A_33_P3257179	Unknown
A_33_P3257479	-0.0251038	Detected	0.0251038	Detected	0	0.00210309	Detected	-0.00806069	Detected	-0.0029788	0.91804	24.5	25	23.7	20.3	A_33_P3257479	Unknown
A_33_P3257755	0.0753667	Detected	-0.0753667	Detected	0	-0.010143	Detected	0.125871	Detected	0.0578642	0.626165	579	514	518	491	A_33_P3257755	Unknown
A_33_P3258417	-0.209089	Detected	0.209089	Detected	0	-0.139936	Detected	0.198838	Detected	0.0294511	0.92284	24.3	32	24.2	26.4	A_33_P3258417	Unknown
A_33_P3258561	-0.0449781	Compromised	0.0449781	Compromised	0	-0.0755863	Compromised	0.2276	Compromised	0.0760067	0.678192	1.84	1.93	1.71	1.82	A_33_P3258561	Unknown
A_33_P3258727	-0.0249581	Compromised	0.0249581	Compromised	0	-0.178334	Compromised	0.109764	Compromised	-0.0342848	0.836407	1.98	2.02	1.69	1.78	A_33_P3258727	Unknown
A_33_P3258732	-0.0575919	Compromised	0.0575914	Compromised	-2.375e-07	-0.0659065	Compromised	0.222626	Compromised	0.0783596	0.664033	1.78	1.9	1.68	1.77	A_33_P3258732	Unknown
A_33_P3258752	-0.0597324	Compromised	0.0597324	Compromised	0	-0.0811391	Compromised	0.237074	Compromised	0.0779676	0.691431	1.7	1.82	1.59	1.71	A_33_P3258752	Unknown
A_33_P3258846	-0.225502	Detected	0.225502	Detected	0	0.146481	Detected	-0.129191	Detected	0.00864506	0.976877	337	454	414	295	A_33_P3258846	Unknown
A_33_P3259239	0.47186	Compromised	-0.47186	Compromised	2.35e-07	-0.144002	Compromised	0.0184789	Compromised	-0.0627615	0.907708	6.07	3.11	3.76	3.63	A_33_P3259239	Unknown
A_33_P3259303	-0.0597324	Compromised	0.0597324	Compromised	0	0.438868	Compromised	0.237074	Compromised	0.337971	0.102235	1.7	1.82	2.28	1.71	A_33_P3259303	Unknown
A_33_P3259560	0.00361395	Detected	-0.00361371	Detected	1.192e-07	-0.427876	Compromised	0.0367475	Compromised	-0.195564	0.488551	10.3	10.1	7.25	8.63	A_33_P3259560	Unknown
A_33_P3259750	-0.051527	Compromised	0.0515275	Compromised	2.385e-07	-0.0813951	Compromised	0.236818	Compromised	0.0777116	0.687851	1.71	1.81	1.59	1.71	A_33_P3259750	Unknown
A_33_P3259954	-0.029171	Compromised	0.0291715	Compromised	2.385e-07	-0.0802875	Compromised	0.582612	Compromised	0.251162	0.529119	1.91	1.96	1.75	2.39	A_33_P3259954	Unknown
A_33_P3260021	-0.127764	Detected	0.127764	Detected	0	-0.116278	Detected	0.114596	Detected	-0.00084114	0.996546	25.5	30	24.4	24.7	A_33_P3260021	Unknown
A_33_P3260034	-0.0343397	Detected	0.0343397	Detected	0	0.293268	Detected	0.219713	Detected	0.256491	0.0363967	29.8	30.8	35.5	29.1	A_33_P3260034	Unknown
A_33_P3260263	0.110262	Compromised	-0.110262	Compromised	0	-0.257481	Compromised	0.0314908	Compromised	-0.112995	0.597563	2.27	1.92	1.67	1.76	A_33_P3260263	Unknown
A_33_P3260455	0.0897358	Detected	-0.0897358	Detected	0	-0.140666	Detected	-0.303079	Detected	-0.221872	0.208211	1310	1140	1060	817	A_33_P3260455	Unknown
A_33_P3260868	-0.0634646	Compromised	0.0634651	Compromised	2.4e-07	-0.0558262	Compromised	0.187791	Compromised	0.0659826	0.678361	1.97	2.12	1.88	1.92	A_33_P3260868	Unknown
A_33_P3261024	-0.237679	Compromised	0.237679	Compromised	0	-0.71313	Compromised	0.585002	Compromised	-0.0640638	0.934604	4.35	5.96	2.97	6.3	A_33_P3261024	Unknown
A_33_P3261074	0.311875	Compromised	-0.311876	Compromised	-2.4e-07	0.412243	Compromised	-0.135046	Compromised	0.138598	0.770119	2.83	1.81	2.88	1.7	A_33_P3261074	Unknown
A_33_P3261097	0.260483	Detected	-0.260482	Compromised	1.25e-07	0.0845222	Detected	-0.181474	Compromised	-0.0484761	0.883596	14.4	9.89	12.1	8.68	A_33_P3261097	Unknown
A_33_P3261192	-0.239492	Compromised	0.239492	Compromised	0	0.691874	Compromised	0.0488529	Compromised	0.370363	0.453108	1.74	2.39	3.15	1.74	A_33_P3261192	Unknown
A_33_P3261308	-0.202317	Compromised	0.202317	Compromised	2.4e-07	-0.306324	Compromised	-0.0124612	Compromised	-0.159393	0.589063	1.97	2.57	1.74	1.84	A_33_P3261308	Unknown
A_33_P3261428	-0.0246062	Compromised	0.0246062	Compromised	0	-0.139107	Compromised	0.19086	Compromised	0.0258765	0.890963	2.03	2.07	1.78	1.93	A_33_P3261428	Unknown
A_33_P3261640	0.304228	Detected	-0.304228	Detected	0	-0.194454	Detected	-0.723247	Detected	-0.45885	0.372944	70.7	45.7	47.5	28.4	A_33_P3261640	Unknown
A_33_P3261706	-0.219757	Compromised	0.219757	Compromised	-2.4e-07	0.0942473	Compromised	0.839342	Compromised	0.466795	0.393346	2.11	2.82	2.49	3.6	A_33_P3261706	Unknown
A_33_P3262022	-0.213387	Detected	0.213387	Detected	0	0.210169	Detected	-0.666973	Detected	-0.228402	0.68565	19.4	25.7	24.7	11.6	A_33_P3262022	Unknown
A_33_P3262074	-0.0711241	Compromised	0.0711236	Compromised	-2.4e-07	-0.0723734	Compromised	0.187164	Compromised	0.0573955	0.73551	1.94	2.11	1.84	1.9	A_33_P3262074	Unknown
A_33_P3262108	-0.208551	Compromised	0.208551	Compromised	-2.35e-07	-1.54476	Compromised	-1.51358	Compromised	-1.52917	0.018195	5.16	6.79	1.94	1.71	A_33_P3262108	Unknown
A_33_P3262128	-0.0471549	Compromised	0.0471554	Compromised	2.385e-07	-0.0732002	Compromised	0.210817	Compromised	0.0688083	0.690776	1.92	2.02	1.79	1.88	A_33_P3262128	Unknown
A_33_P3262167	-0.391833	Compromised	0.391833	Compromised	0	-0.287188	Compromised	-0.283397	Compromised	-0.285292	0.542265	4.35	7.38	4.44	3.84	A_33_P3262167	Unknown
A_33_P3262217	-0.166297	Compromised	0.166297	Compromised	0	-0.136284	Compromised	1.35707	Compromised	0.610392	0.508601	1.95	2.42	1.89	4.59	A_33_P3262217	Unknown
A_33_P3262327	0.0867779	Detected	-0.0867779	Detected	0	0.270764	Detected	0.193079	Detected	0.231921	0.134874	52.3	45.7	56.4	46.1	A_33_P3262327	Unknown
A_33_P3262366	-0.0510669	Compromised	0.0510664	Compromised	-2.375e-07	-0.0796766	Compromised	0.228915	Compromised	0.0746193	0.691217	1.73	1.83	1.61	1.72	A_33_P3262366	Unknown
A_33_P3262440	-0.173064	Compromised	0.173065	Detected	1.2e-07	0.162974	Detected	-0.180175	Compromised	-0.00860035	0.975053	9.18	11.5	11	7.48	A_33_P3262440	Unknown
A_33_P3262537	-0.379014	Compromised	0.379014	Detected	0	-0.793116	Compromised	0.393411	Compromised	-0.199852	0.803191	6.12	10.2	4.36	8.56	A_33_P3262537	Unknown
A_33_P3262600	-0.0570855	Compromised	0.0570855	Compromised	0	-0.0729575	Compromised	1.02018	Compromised	0.47361	0.479611	1.8	1.92	1.69	3.11	A_33_P3262600	Unknown
A_33_P3262704	-0.0351043	Compromised	0.0351047	Compromised	2.375e-07	-0.134398	Compromised	0.179992	Compromised	0.0227969	0.900417	2.02	2.09	1.79	1.92	A_33_P3262704	Unknown
A_33_P3263198	0.121304	Compromised	-0.121304	Compromised	0	-2.24961	Compromised	-1.93626	Compromised	-2.09294	0.00884452	9.1	7.58	1.67	1.79	A_33_P3263198	Unknown
A_33_P3263202	-0.0528622	Compromised	0.0528617	Compromised	-2.385e-07	-0.00982189	Compromised	0.693473	Compromised	0.341825	0.437848	1.82	1.93	1.78	2.5	A_33_P3263202	Unknown
A_33_P3263274	0.0667152	Detected	-0.0667157	Detected	-2.4e-07	-0.0586982	Detected	-0.0811586	Detected	-0.0699284	0.409928	7090	6370	6170	5240	A_33_P3263274	Unknown
A_33_P3263293	0.0697012	Compromised	-0.0697017	Compromised	-2.375e-07	-0.268548	Compromised	0.285378	Compromised	0.00841499	0.97917	2.85	2.55	2.14	2.71	A_33_P3263293	Unknown
A_33_P3263512	-0.0649977	Detected	0.0649982	Detected	2.4e-07	-0.1482	Detected	-0.136194	Detected	-0.142197	0.161244	10200	11000	9140	7950	A_33_P3263512	Unknown
A_33_P3263747	-0.0504575	Detected	0.0504575	Detected	0	-0.0475054	Detected	0.261158	Detected	0.106826	0.578194	123	130	117	125	A_33_P3263747	Unknown
A_33_P3263989	-0.017904	Detected	0.017904	Detected	0	0.157391	Detected	-0.144596	Detected	0.00639749	0.970262	292	295	313	219	A_33_P3263989	Unknown
A_33_P3264399	-0.0604234	Compromised	0.0604239	Compromised	2.38e-07	-0.377992	Compromised	-0.290951	Compromised	-0.334471	0.0461613	7.68	8.23	5.85	5.36	A_33_P3264399	Unknown
A_33_P3264424	0.128032	Detected	-0.128032	Detected	0	-0.262209	Detected	-0.406226	Detected	-0.334218	0.150692	107	88.3	77.5	60.5	A_33_P3264424	Unknown
A_33_P3264533	0.444126	Compromised	-0.444126	Compromised	0	-0.867051	Compromised	-0.579807	Compromised	-0.723429	0.261307	4.47	2.38	1.71	1.8	A_33_P3264533	Unknown
A_33_P3264746	-0.0521009	Detected	0.0521009	Detected	0	0.0230005	Detected	0.0540411	Detected	0.0385208	0.552042	1180	1250	1180	1040	A_33_P3264746	Unknown
A_33_P3264940	0.139565	Compromised	-0.139565	Compromised	-2.4e-07	-1.28783	Compromised	0.314029	Compromised	-0.486902	0.610043	5.27	4.28	1.86	4.87	A_33_P3264940	Unknown
A_33_P3264955	0.0806344	Detected	-0.0806344	Detected	0	-0.333649	Detected	-0.339719	Detected	-0.336684	0.0529212	2190	1930	1560	1340	A_33_P3264955	Unknown
A_33_P3264960	-0.280815	Detected	0.280815	Detected	0	-0.508641	Detected	0.462982	Detected	-0.022829	0.971244	13.2	19.2	10.7	18.1	A_33_P3264960	Unknown
A_33_P3265205	0.14924	Compromised	-0.14924	Compromised	-2.4e-07	-1.47801	Compromised	-1.53029	Compromised	-1.50415	0.00999456	7.55	6.05	2.32	1.93	A_33_P3265205	Unknown
A_33_P3265249	-0.0349855	Compromised	0.0349855	Compromised	0	-0.157614	Compromised	0.134918	Compromised	-0.011348	0.94672	2.03	2.1	1.77	1.87	A_33_P3265249	Unknown
A_33_P3265254	-0.0501156	Compromised	0.0501156	Compromised	0	0.941217	Compromised	1.50126	Compromised	1.22124	0.0502084	1.95	2.06	3.68	4.68	A_33_P3265254	Unknown
A_33_P3265260	-0.485811	Compromised	0.485811	Compromised	0	-0.590259	Compromised	-0.885806	Compromised	-0.738033	0.283292	2.82	5.45	2.49	1.75	A_33_P3265260	Unknown
A_33_P3265264	-0.0214882	Compromised	0.0214877	Compromised	-2.385e-07	-0.126469	Compromised	0.206736	Compromised	0.0401337	0.83342	1.96	1.99	1.73	1.88	A_33_P3265264	Unknown
A_33_P3265419	-0.00598907	Compromised	0.00598907	Compromised	0	1.23164	Detected	0.822359	Compromised	1.027	0.0375168	4.78	4.75	10.7	6.95	A_33_P3265419	Unknown
A_33_P3265539	-0.0502479	Detected	0.0502479	Detected	0	-1.24364	Compromised	-0.389686	Compromised	-0.816661	0.197886	10.6	11.2	4.4	6.86	A_33_P3265539	Unknown
A_33_P3265624	-0.0491147	Compromised	0.0491147	Compromised	0	-0.0981035	Compromised	0.215252	Compromised	0.0585742	0.755412	1.82	1.92	1.67	1.79	A_33_P3265624	Unknown
A_33_P3265866	-0.071526	Detected	0.071526	Detected	0	-0.788654	Detected	-1.53913	Detected	-1.16389	0.0929441	102	111	58.9	30.2	A_33_P3265866	Unknown
A_33_P3265935	0.275476	Compromised	-0.275477	Compromised	-2.35e-07	-0.218465	Compromised	0.224784	Compromised	0.00315928	0.993681	7.21	4.85	4.86	5.7	A_33_P3265935	Unknown
A_33_P3266022	0.107772	Detected	-0.107772	Detected	0	0.412177	Detected	-0.299028	Detected	0.0565745	0.892957	23.8	20.2	27.9	14.7	A_33_P3266022	Unknown
A_33_P3266091	-0.0178537	Compromised	0.0178542	Compromised	2.385e-07	-0.165145	Compromised	0.147635	Compromised	-0.00875521	0.960699	1.96	1.98	1.68	1.8	A_33_P3266091	Unknown
A_33_P3266195	-0.161453	Compromised	0.161453	Detected	-1.2e-07	-2.3803	Compromised	-2.11896	Compromised	-2.24963	0.00841711	8.68	10.7	1.77	1.83	A_33_P3266195	Unknown
A_33_P3266609	-0.238228	Compromised	0.238228	Detected	0	0.00414252	Detected	-0.28638	Compromised	-0.141119	0.663259	8.46	11.6	9.5	6.7	A_33_P3266609	Unknown
A_33_P3266614	0.167866	Detected	-0.167866	Detected	0	0.133556	Detected	0.372795	Detected	0.253175	0.344275	1780	1390	1650	1680	A_33_P3266614	Unknown
A_33_P3266889	-0.167684	Compromised	0.167684	Detected	0	-1.01418	Compromised	0.607607	Detected	-0.203287	0.828963	9.49	11.8	5.01	13.3	A_33_P3266889	Unknown
A_33_P3267150	0.116628	Detected	-0.116628	Detected	0	-0.1157	Detected	-0.804845	Compromised	-0.460272	0.33323	19.8	16.6	16	8.56	A_33_P3267150	Unknown
A_33_P3268161	-0.0347505	Compromised	0.0347509	Compromised	2.4e-07	-0.163396	Compromised	0.121009	Compromised	-0.0211935	0.898158	2.05	2.12	1.78	1.87	A_33_P3268161	Unknown
A_33_P3268167	0.0200694	Detected	-0.0200694	Detected	0	-0.123386	Detected	0.012749	Detected	-0.0553184	0.51727	313	300	269	255	A_33_P3268167	Unknown
A_33_P3268219	-0.073797	Detected	0.0737967	Detected	-1.2e-07	-0.837346	Compromised	-0.536512	Compromised	-0.686929	0.0546575	12	13.1	6.71	7.13	A_33_P3268219	Unknown
A_33_P3268294	-0.872658	Compromised	0.872658	Compromised	2.25e-07	-0.902526	Compromised	-0.188384	Compromised	-0.545455	0.621393	1.71	5.65	1.59	2.25	A_33_P3268294	Unknown
A_33_P3268318	-0.0904024	Detected	0.0904024	Detected	0	-0.200141	Detected	-0.279289	Detected	-0.239715	0.135794	31.6	35.3	27.8	22.7	A_33_P3268318	Unknown
A_33_P3268395	0.976199	Compromised	-0.976198	Compromised	2.5e-07	-1.13208	Compromised	-0.826271	Compromised	-0.979176	0.426142	7.54	1.92	1.66	1.77	A_33_P3268395	Unknown
A_33_P3269373	-0.0513372	Compromised	0.0513377	Compromised	2.39e-07	-0.0708728	Compromised	0.198328	Compromised	0.0637274	0.701461	1.89	2	1.77	1.84	A_33_P3269373	Unknown
A_33_P3269380	0.0949175	Detected	-0.0949175	Detected	0	-0.287971	Detected	0.0577238	Detected	-0.115124	0.618421	50	43.2	36.4	39.9	A_33_P3269380	Unknown
A_33_P3269528	0.120987	Detected	-0.120987	Compromised	0	-0.0887506	Detected	-0.181051	Compromised	-0.134901	0.406899	12	10	9.85	7.97	A_33_P3269528	Unknown
A_33_P3270417	-0.0889587	Compromised	0.0889587	Compromised	0	-1.95541	Compromised	-1.42363	Compromised	-1.68952	0.0264512	6.53	7.28	1.7	2.12	A_33_P3270417	Unknown
A_33_P3270474	-0.0769486	Compromised	0.0769486	Compromised	0	-0.0540438	Compromised	0.415894	Compromised	0.180925	0.540445	1.97	2.16	1.9	2.27	A_33_P3270474	Unknown
A_33_P3270593	-0.129576	Detected	0.129576	Detected	0	-0.138981	Detected	0.0540378	Detected	-0.0424716	0.817252	45.7	53.9	43.1	42.5	A_33_P3270593	Unknown
A_33_P3270639	0.0328252	Detected	-0.032825	Detected	1.185e-07	-0.057497	Detected	0.10078	Detected	0.0216417	0.824169	12	11.3	10.7	10.3	A_33_P3270639	Unknown
A_33_P3271038	0.203477	Compromised	-0.203477	Compromised	2.4e-07	-0.251458	Compromised	0.332624	Compromised	0.0405834	0.919638	6.7	4.98	4.64	6	A_33_P3271038	Unknown
A_33_P3271121	0.0130446	Detected	-0.0130446	Detected	0	-0.153705	Detected	-0.25146	Detected	-0.202582	0.0570724	622	602	526	424	A_33_P3271121	Unknown
A_33_P3271126	0.0697582	Detected	-0.0697582	Detected	0	0.105866	Detected	0.0576551	Detected	0.0817604	0.383345	750	671	730	609	A_33_P3271126	Unknown
A_33_P3271187	-0.225723	Detected	0.225723	Detected	0	0.477409	Detected	0.11564	Detected	0.296524	0.413102	18.7	25.2	28.9	19.4	A_33_P3271187	Unknown
A_33_P3271885	-0.125271	Detected	0.125272	Detected	1.2e-07	-0.639492	Compromised	-0.163526	Detected	-0.401509	0.274013	11.6	13.6	7.71	9.25	A_33_P3271885	Unknown
A_33_P3272456	-0.089015	Compromised	0.0890155	Compromised	2.37e-07	0.157853	Compromised	0.131426	Compromised	0.144639	0.249244	1.74	1.94	1.96	1.66	A_33_P3272456	Unknown
A_33_P3272513	0.0134799	Detected	-0.0134799	Detected	0	0.0928686	Detected	0.0894167	Detected	0.0911427	0.0215178	33.6	32.5	33.7	29	A_33_P3272513	Unknown
A_33_P3272668	-0.0501752	Compromised	0.0501752	Compromised	0	-0.0763574	Compromised	0.229996	Compromised	0.0768194	0.680646	1.77	1.87	1.65	1.76	A_33_P3272668	Unknown
A_33_P3272952	0.416085	Detected	-0.416085	Compromised	-1.2e-07	-2.34369	Compromised	0.153706	Compromised	-1.09499	0.492959	12.7	7.03	1.78	8.67	A_33_P3272952	Unknown
A_33_P3273118	-0.0702386	Compromised	0.0702381	Compromised	-2.4e-07	-0.0549469	Compromised	0.188512	Compromised	0.0667825	0.681491	1.97	2.14	1.89	1.93	A_33_P3273118	Unknown
A_33_P3273752	0.492913	Compromised	-0.492912	Compromised	2.35e-07	-0.638437	Compromised	0.760499	Compromised	0.0610313	0.949631	4.2	2.09	1.82	4.14	A_33_P3273752	Unknown
A_33_P3273767	0.170754	Compromised	-0.170754	Compromised	0	-0.0609512	Compromised	-0.0374246	Compromised	-0.0491879	0.800861	2.61	2.03	2.11	1.85	A_33_P3273767	Unknown
A_33_P3273802	-0.0512953	Compromised	0.0512958	Compromised	2.385e-07	-0.0805306	Compromised	0.220176	Compromised	0.0698228	0.703218	1.72	1.82	1.6	1.7	A_33_P3273802	Unknown
A_33_P3274001	-0.0323911	Detected	0.0323911	Detected	0	-0.23072	Detected	0.50453	Detected	0.136905	0.74627	58.5	60.3	48.4	69.5	A_33_P3274001	Unknown
A_33_P3274006	-0.0495319	Compromised	0.0495319	Compromised	0	-0.0999613	Compromised	0.222694	Compromised	0.0613663	0.750975	1.8	1.9	1.65	1.78	A_33_P3274006	Unknown
A_33_P3274080	0.0740755	Detected	-0.0740755	Detected	0	0.194089	Detected	0.00391841	Detected	0.0990038	0.497763	75.9	67.5	78.3	59.2	A_33_P3274080	Unknown
A_33_P3274090	0.0786381	Detected	-0.0786381	Detected	0	0.361681	Detected	0.378124	Detected	0.369902	0.0427788	12.9	11.4	14.9	13	A_33_P3274090	Unknown
A_33_P3274184	-0.138137	Compromised	0.138137	Detected	0	-0.0832367	Compromised	-1.32224	Compromised	-0.702737	0.383555	8.63	10.3	8.51	3.11	A_33_P3274184	Unknown
A_33_P3274189	0.225446	Detected	-0.225446	Detected	0	-0.436418	Detected	0.173941	Detected	-0.131238	0.762421	40.5	29.2	24.3	32	A_33_P3274189	Unknown
A_33_P3274204	-0.0440874	Compromised	0.0440879	Compromised	2.385e-07	0.223659	Compromised	0.173868	Compromised	0.198764	0.0591855	1.89	1.98	2.16	1.8	A_33_P3274204	Unknown
A_33_P3274209	-0.800685	Compromised	0.800685	Compromised	-2.5e-07	-0.76086	Compromised	-0.628398	Compromised	-0.694629	0.478397	2.07	6.19	2.02	1.91	A_33_P3274209	Unknown
A_33_P3274763	0.310142	Compromised	-0.310142	Compromised	0	-0.448747	Compromised	1.25376	Compromised	0.402506	0.700293	2.87	1.84	1.61	4.52	A_33_P3274763	Unknown
A_33_P3275163	-0.0483336	Detected	0.0483336	Detected	0	0.226422	Detected	0.397091	Detected	0.311756	0.0863369	53.9	56.8	61.9	60.1	A_33_P3275163	Unknown
A_33_P3275415	0.0459023	Detected	-0.0459023	Detected	0	0.221182	Detected	0.748682	Detected	0.484932	0.21178	59.8	55.3	64.1	79.7	A_33_P3275415	Unknown
A_33_P3275651	0.068964	Compromised	-0.068964	Compromised	0	-0.401301	Compromised	-1.38384	Compromised	-0.892572	0.213796	5.75	5.15	3.94	1.72	A_33_P3275651	Unknown
A_33_P3275826	0.0339727	Detected	-0.0339727	Detected	0	0.109075	Detected	0.334596	Detected	0.221835	0.200297	117000	110000	117000	118000	A_33_P3275826	Unknown
A_33_P3276062	0.010221	Compromised	-0.010221	Compromised	0	-0.492124	Compromised	-0.688571	Compromised	-0.590348	0.0268608	6.7	6.51	4.49	3.38	A_33_P3276062	Unknown
A_33_P3276087	-0.530235	Compromised	0.530235	Compromised	0	0.622635	Compromised	0.871195	Compromised	0.746915	0.303822	3.25	6.68	6.86	7.03	A_33_P3276087	Unknown
A_33_P3276217	-0.0389619	Compromised	0.0389619	Compromised	0	-0.141053	Compromised	0.159653	Compromised	0.0093	0.957699	1.99	2.07	1.76	1.87	A_33_P3276217	Unknown
A_33_P3276222	0.0929062	Detected	-0.0929062	Detected	0	-0.12845	Detected	-0.85343	Detected	-0.49094	0.319897	786	681	640	334	A_33_P3276222	Unknown
A_33_P3276376	-0.0736012	Compromised	0.0736012	Compromised	0	1.26514	Compromised	1.66415	Compromised	1.46465	0.0204354	1.97	2.15	4.73	5.38	A_33_P3276376	Unknown
A_33_P3276758	-0.186452	Detected	0.186452	Detected	0	0.069221	Detected	-0.601125	Detected	-0.265952	0.559758	21	26.8	23.8	12.9	A_33_P3276758	Unknown
A_33_P3276805	-0.0467062	Compromised	0.0467062	Compromised	0	-0.0829658	Compromised	0.225056	Compromised	0.0710452	0.70203	1.75	1.84	1.62	1.73	A_33_P3276805	Unknown
A_33_P3276808	-0.134941	Compromised	0.134941	Compromised	2.4e-07	0.596859	Compromised	0.868135	Compromised	0.732497	0.0619532	1.7	2.02	2.68	2.79	A_33_P3276808	Unknown
A_33_P3276868	-0.0642538	Compromised	0.0642538	Compromised	0	-0.0576839	Compromised	0.178768	Compromised	0.0605419	0.696825	1.94	2.09	1.85	1.88	A_33_P3276868	Unknown
A_33_P3276927	0.543937	Detected	-0.543937	Detected	0	-0.0625355	Detected	0.115216	Detected	0.0263402	0.966226	132	61.2	82.3	80.3	A_33_P3276927	Unknown
A_33_P3277043	0.388652	Compromised	-0.388652	Compromised	-1.1e-07	-0.905841	Compromised	-0.185499	Compromised	-0.54567	0.411351	10	5.75	3.87	5.5	A_33_P3277043	Unknown
A_33_P3277060	0.185078	Detected	-0.185078	Compromised	1.15e-07	-1.05935	Compromised	-0.243928	Compromised	-0.651639	0.282829	9.01	6.87	3.61	5.48	A_33_P3277060	Unknown
A_33_P3277228	0.696028	Compromised	-0.696028	Compromised	0	0.0576639	Compromised	-1.07644	Compromised	-0.509389	0.627646	7.51	2.82	4.58	1.8	A_33_P3277228	Unknown
A_33_P3277378	0.230487	Detected	-0.230487	Compromised	0	0.11121	Detected	0.266427	Detected	0.188819	0.518763	11.9	8.52	10.4	9.99	A_33_P3277378	Unknown
A_33_P3277679	0.00671339	Detected	-0.00671339	Detected	0	-2.62888	Compromised	-1.64051	Compromised	-2.1347	0.0496448	12.7	12.4	1.94	3.32	A_33_P3277679	Unknown
A_33_P3277758	0.160364	Detected	-0.160363	Detected	1.15e-07	-0.977939	Compromised	0.319073	Detected	-0.329433	0.670745	12.8	10.1	5.52	11.7	A_33_P3277758	Unknown
A_33_P3277805	0.0525143	Detected	-0.0525143	Detected	0	-0.482116	Detected	-0.046479	Detected	-0.264297	0.359471	705	646	462	539	A_33_P3277805	Unknown
A_33_P3277952	0.527575	Compromised	-0.527575	Compromised	0	-0.3941	Compromised	-0.388298	Compromised	-0.391199	0.535642	4.47	2.12	2.24	1.94	A_33_P3277952	Unknown
A_33_P3278152	-0.013063	Detected	0.013063	Detected	0	-0.188535	Detected	-0.0140362	Detected	-0.101285	0.369728	85.3	85.6	71.7	69.8	A_33_P3278152	Unknown
A_33_P3278159	-0.0594728	Detected	0.0594728	Detected	0	-0.0701477	Detected	-0.132413	Detected	-0.10128	0.270405	641	686	604	499	A_33_P3278159	Unknown
A_33_P3278303	-0.177634	Detected	0.177634	Detected	0	0.330883	Detected	-0.455873	Detected	-0.0624952	0.89815	234	295	316	158	A_33_P3278303	Unknown
A_33_P3278684	0.498543	Detected	-0.498543	Compromised	0	0.783098	Detected	-0.70215	Compromised	0.0404741	0.96802	12.8	6.32	14.8	4.56	A_33_P3278684	Unknown
A_33_P3278714	-0.12494	Detected	0.12494	Detected	0	0.0162504	Detected	0.191311	Detected	0.103781	0.566501	25.6	30	26.8	26.1	A_33_P3278714	Unknown
A_33_P3278896	-0.0163953	Detected	0.0163953	Detected	0	-0.00141501	Detected	-0.141126	Detected	-0.0712705	0.425251	24.5	24.7	23.5	18.4	A_33_P3278896	Unknown
A_33_P3279181	0.154245	Compromised	-0.154245	Compromised	0	0.259443	Compromised	0.313426	Compromised	0.286434	0.208868	7.59	6.04	7.75	6.94	A_33_P3279181	Unknown
A_33_P3279381	-0.0316448	Compromised	0.0316448	Compromised	0	-0.130939	Compromised	0.183452	Compromised	0.0262563	0.884983	2.02	2.08	1.79	1.92	A_33_P3279381	Unknown
A_33_P3279388	-0.0560174	Compromised	0.0560174	Compromised	0	-0.0689125	Compromised	0.240839	Compromised	0.0859635	0.653752	1.69	1.8	1.59	1.7	A_33_P3279388	Unknown
A_33_P3279392	0.0988393	Compromised	-0.0988393	Compromised	0	0.0358887	Compromised	1.58667	Compromised	0.811279	0.408341	2.63	2.26	2.39	6.04	A_33_P3279392	Unknown
A_33_P3279456	0.0369883	Detected	-0.0369878	Detected	2.4e-07	-0.155683	Detected	-0.099371	Detected	-0.127527	0.111151	5490	5140	4560	4090	A_33_P3279456	Unknown
A_33_P3279505	-0.799975	Compromised	0.799974	Compromised	-2.3e-07	0.210032	Compromised	-0.719947	Compromised	-0.254958	0.808759	2.38	7.11	4.55	2.06	A_33_P3279505	Unknown
A_33_P3279984	-0.211182	Compromised	0.211182	Compromised	0	-1.0583	Compromised	0.715794	Compromised	-0.171253	0.868354	3.43	4.53	1.81	5.34	A_33_P3279984	Unknown
A_33_P3280325	-0.770366	Compromised	0.770366	Compromised	0	-0.144757	Compromised	1.23502	Compromised	0.545131	0.650728	2.26	6.48	3.31	7.43	A_33_P3280325	Unknown
A_33_P3280355	0.153412	Detected	-0.153412	Detected	-2.35e-07	0.0245004	Detected	-0.183394	Detected	-0.079447	0.709887	18200	14500	15800	11800	A_33_P3280355	Unknown
A_33_P3280412	0.127087	Compromised	-0.127087	Compromised	0	-0.401884	Compromised	0.498421	Compromised	0.0482688	0.927224	7.6	6.28	5	8.05	A_33_P3280412	Unknown
A_33_P3280502	0.149599	Detected	-0.149599	Detected	0	0.142238	Detected	0.245299	Detected	0.193769	0.345379	21.6	17.3	20.4	18.9	A_33_P3280502	Unknown
A_33_P3280709	1.11816	Detected	-1.11816	Compromised	1e-07	0.0444012	Compromised	0.812086	Compromised	0.428244	0.751869	9.18	1.92	4.14	6.08	A_33_P3280709	Unknown
A_33_P3280974	0.329402	Compromised	-0.329402	Compromised	0	-0.508561	Compromised	-0.205375	Compromised	-0.356968	0.428685	3.22	2.01	1.71	1.82	A_33_P3280974	Unknown
A_33_P3281176	-0.185375	Detected	0.185375	Detected	0	0.125016	Detected	0.299217	Detected	0.212117	0.409176	35	44.6	41.2	40.1	A_33_P3281176	Unknown
A_33_P3281303	0.0839207	Detected	-0.0839207	Detected	0	-0.0600951	Detected	0.270386	Detected	0.105146	0.627672	22	19.3	18.9	20.5	A_33_P3281303	Unknown
A_33_P3281373	0.141072	Compromised	-0.141072	Compromised	0	-1.05072	Compromised	-1.52741	Compromised	-1.28907	0.0431944	8.23	6.67	3.42	2.12	A_33_P3281373	Unknown
A_33_P3281478	0.0384572	Detected	-0.0384572	Detected	0	-0.561602	Detected	0.0637677	Detected	-0.248917	0.512266	19.8	18.5	12.4	16.5	A_33_P3281478	Unknown
A_33_P3281563	-0.581931	Compromised	0.581931	Compromised	2.3e-07	-0.628574	Compromised	-0.344509	Compromised	-0.486542	0.501959	1.73	3.82	1.59	1.67	A_33_P3281563	Unknown
A_33_P3281728	-0.819222	Compromised	0.819223	Compromised	2.25e-07	-0.872636	Compromised	-0.589429	Compromised	-0.731033	0.471977	1.76	5.4	1.61	1.69	A_33_P3281728	Unknown
A_33_P3281765	-0.0122752	Compromised	0.0122752	Compromised	0	0.476116	Detected	-0.397119	Compromised	0.0394986	0.936187	8.26	8.28	11	5.18	A_33_P3281765	Unknown
A_33_P3282023	-0.819595	Compromised	0.819595	Compromised	0	0.20862	Compromised	-0.0267773	Compromised	0.0909212	0.922587	1.72	5.28	3.33	2.44	A_33_P3282023	Unknown
A_33_P3282213	0.0610664	Detected	-0.0610666	Detected	-1.19e-07	-0.463639	Detected	-1.06638	Compromised	-0.765011	0.130642	12.7	11.5	8.38	4.76	A_33_P3282213	Unknown
A_33_P3282354	0.471347	Compromised	-0.471348	Compromised	-2.35e-07	-0.958878	Compromised	1.06857	Compromised	0.0548484	0.965329	5.11	2.62	1.8	6.33	A_33_P3282354	Unknown
A_33_P3282624	-0.0495319	Compromised	0.0495319	Compromised	0	-0.0724058	Compromised	0.216787	Compromised	0.0721908	0.683224	1.98	2.09	1.85	1.95	A_33_P3282624	Unknown
A_33_P3282649	-0.181584	Detected	0.181584	Detected	-1.2e-07	-1.08917	Compromised	-0.52616	Compromised	-0.807665	0.137436	9.94	12.6	5.03	6.41	A_33_P3282649	Unknown
A_33_P3282744	-0.0528622	Compromised	0.0528617	Compromised	-2.385e-07	-0.0761642	Compromised	0.211504	Compromised	0.0676701	0.701938	1.82	1.93	1.7	1.79	A_33_P3282744	Unknown
A_33_P3283064	-0.000976324	Detected	0.000976324	Detected	0	-0.0038774	Detected	0.147966	Detected	0.0720441	0.442846	152	150	144	138	A_33_P3283064	Unknown
A_33_P3283117	0.467578	Compromised	-0.467578	Compromised	0	1.04589	Compromised	-0.306004	Compromised	0.369945	0.696719	3.57	1.84	5.06	1.71	A_33_P3283117	Unknown
A_33_P3283167	0.0189161	Detected	-0.0189166	Detected	-2.385e-07	-0.0795188	Detected	-0.306848	Detected	-0.193183	0.235628	3000	2880	2660	1960	A_33_P3283167	Unknown
A_33_P3283350	-0.287542	Compromised	0.287541	Compromised	-2.35e-07	-0.916217	Compromised	1.74368	Detected	0.413733	0.789798	4.87	7.15	2.99	16.3	A_33_P3283350	Unknown
A_33_P3283535	0.0548477	Compromised	-0.0548477	Compromised	0	-1.84567	Compromised	-1.58486	Compromised	-1.71526	0.00673384	7.04	6.43	1.79	1.85	A_33_P3283535	Unknown
A_33_P3283646	-0.357745	Compromised	0.357745	Compromised	2.35e-07	-0.805596	Compromised	-0.49095	Compromised	-0.648273	0.239021	2.96	4.79	2.06	2.21	A_33_P3283646	Unknown
A_33_P3283700	0.961798	Compromised	-0.961797	Compromised	2.3e-07	-1.08059	Compromised	-0.782461	Compromised	-0.931528	0.439519	7.16	1.86	1.65	1.75	A_33_P3283700	Unknown
A_33_P3283734	-0.0302949	Compromised	0.0302949	Compromised	0	-0.0983181	Compromised	0.18405	Compromised	0.042866	0.794565	1.8	1.85	1.63	1.71	A_33_P3283734	Unknown
A_33_P3284117	-0.0475311	Compromised	0.0475307	Compromised	-2.39e-07	0.351185	Compromised	0.223841	Compromised	0.287513	0.0686065	1.71	1.8	2.14	1.69	A_33_P3284117	Unknown
A_33_P3284252	-0.0573373	Compromised	0.0573373	Compromised	0	-0.0737343	Compromised	0.222926	Compromised	0.0745957	0.685178	1.79	1.91	1.68	1.78	A_33_P3284252	Unknown
A_33_P3284295	-0.616756	Compromised	0.616756	Compromised	0	1.20085	Compromised	0.533392	Compromised	0.867121	0.341771	2.08	4.82	6.96	3.78	A_33_P3284295	Unknown
A_33_P3284873	-0.767065	Compromised	0.767065	Compromised	0	-0.0101404	Compromised	0.479349	Compromised	0.234604	0.798206	1.92	5.48	3.08	3.73	A_33_P3284873	Unknown
A_33_P3285097	-0.0203452	Detected	0.0203452	Detected	0	-0.90625	Compromised	-0.235324	Detected	-0.570787	0.231535	14.6	14.8	7.5	10.3	A_33_P3285097	Unknown
A_33_P3285371	-0.0503941	Compromised	0.0503945	Compromised	2.375e-07	-0.0948744	Compromised	1.27837	Compromised	0.591745	0.480632	1.76	1.86	1.62	3.62	A_33_P3285371	Unknown
A_33_P3285764	-0.725068	Compromised	0.725067	Compromised	-2.3e-07	0.552718	Compromised	0.0681467	Compromised	0.310432	0.724016	1.79	4.82	4.12	2.54	A_33_P3285764	Unknown
A_33_P3285769	-0.00237942	Detected	0.00237894	Detected	-2.384e-07	0.078115	Detected	0.0770187	Detected	0.0775669	0.000989269	26700	26400	26800	23100	A_33_P3285769	Unknown
A_33_P3286101	-0.395664	Compromised	0.395663	Compromised	-2.4e-07	-0.550297	Compromised	-0.253637	Compromised	-0.401967	0.441864	1.97	3.36	1.68	1.78	A_33_P3286101	Unknown
A_33_P3286162	-0.00618529	Detected	0.00618529	Detected	0	0.0645769	Detected	0.303661	Detected	0.184119	0.263859	333	331	332	338	A_33_P3286162	Unknown
A_33_P3286499	-0.387877	Compromised	0.387877	Compromised	-2.3e-07	0.362013	Compromised	0.0307999	Compromised	0.196406	0.687227	2.75	4.64	4.39	3.01	A_33_P3286499	Unknown
A_33_P3286699	0.606753	Compromised	-0.606753	Compromised	0	-0.0574222	Compromised	0.631718	Compromised	0.287148	0.720597	8.33	3.54	4.99	6.94	A_33_P3286699	Unknown
A_33_P3286709	-1.00736	Compromised	1.00736	Compromised	0	-0.542756	Compromised	0.64121	Compromised	0.049227	0.970222	1.71	6.81	2.24	4.39	A_33_P3286709	Unknown
A_33_P3287084	0.0881	Detected	-0.0881	Detected	0	0.195111	Detected	0.08078	Detected	0.137945	0.319465	31.3	27.3	32	25.5	A_33_P3287084	Unknown
A_33_P3287105	-0.073045	Detected	0.073045	Detected	0	-0.328437	Detected	-0.135548	Detected	-0.231992	0.195202	718	783	571	563	A_33_P3287105	Unknown
A_33_P3287238	-0.0352249	Compromised	0.0352244	Compromised	-2.385e-07	-0.168232	Compromised	0.117769	Compromised	-0.0252316	0.879737	2.01	2.08	1.74	1.83	A_33_P3287238	Unknown
A_33_P3287310	-0.0760567	Detected	0.0760567	Detected	0	0.0891087	Detected	0.1719	Detected	0.130504	0.270776	65.2	71.4	69.4	63.4	A_33_P3287310	Unknown
A_33_P3287314	0.405182	Compromised	-0.405182	Compromised	0	0.884867	Detected	0.249852	Compromised	0.567359	0.385286	8.31	4.67	11	6.11	A_33_P3287314	Unknown
A_33_P3287388	0.11877	Detected	-0.11877	Detected	0	0.0916913	Detected	-0.421043	Detected	-0.164676	0.618964	117	97.8	109	65.9	A_33_P3287388	Unknown
A_33_P3287897	-0.152815	Detected	0.152815	Detected	0	-0.0722992	Detected	-0.365163	Detected	-0.218731	0.409981	26.6	32.4	26.7	18.8	A_33_P3287897	Unknown
A_33_P3288079	-0.338799	Compromised	0.338798	Detected	-1.2e-07	-1.1772	Compromised	1.06656	Detected	-0.0553174	0.966642	7.93	12.5	4.21	17.2	A_33_P3288079	Unknown
A_33_P3288275	-0.264161	Compromised	0.264161	Compromised	2.35e-07	0.495079	Compromised	-0.000337601	Compromised	0.24737	0.565061	1.78	2.53	2.86	1.75	A_33_P3288275	Unknown
A_33_P3288434	-0.0286107	Compromised	0.0286102	Compromised	-2.38e-07	-0.157709	Compromised	0.137528	Compromised	-0.0100901	0.952605	1.97	2.02	1.71	1.81	A_33_P3288434	Unknown
A_33_P3288814	0.800567	Compromised	-0.800567	Compromised	-2.25e-07	-0.284526	Compromised	0.719104	Compromised	0.217289	0.839492	6.28	2.04	2.81	4.86	A_33_P3288814	Unknown
A_33_P3288919	-0.225437	Compromised	0.225437	Compromised	0	-0.246844	Compromised	0.0713697	Compromised	-0.0877371	0.780638	1.7	2.29	1.59	1.71	A_33_P3288919	Unknown
A_33_P3288995	-0.183707	Compromised	0.183706	Compromised	-2.4e-07	0.807638	Compromised	-0.310399	Compromised	0.24862	0.71374	3.28	4.17	6.19	2.46	A_33_P3288995	Unknown
A_33_P3289000	0.393764	Compromised	-0.393764	Compromised	0	1.52924	Detected	0.563958	Compromised	1.0466	0.234928	5.85	3.34	12.2	5.39	A_33_P3289000	Unknown
A_33_P3289093	0.0227966	Compromised	-0.0227966	Compromised	0	-1.80418	Compromised	-1.48659	Compromised	-1.64539	0.00937204	5.98	5.71	1.6	1.72	A_33_P3289093	Unknown
A_33_P3289391	-0.0311177	Detected	0.0311177	Detected	0	-0.0719287	Detected	0.262439	Detected	0.0952554	0.631752	82.9	85.3	76.5	83.2	A_33_P3289391	Unknown
A_33_P3289466	-0.0131302	Detected	0.0131302	Detected	0	0.133105	Detected	0.432936	Detected	0.283021	0.200758	27.7	27.8	29.1	30.9	A_33_P3289466	Unknown
A_33_P3289976	0.0382023	Detected	-0.0382023	Detected	0	0.0803051	Detected	0.274885	Detected	0.177595	0.231396	39800	37200	38900	38400	A_33_P3289976	Unknown
A_33_P3290149	-0.583172	Compromised	0.583173	Detected	2.5e-07	0.127826	Detected	-1.40629	Compromised	-0.639231	0.575311	5.38	11.9	8.36	2.49	A_33_P3290149	Unknown
A_33_P3290610	-0.0501752	Compromised	0.0501752	Compromised	0	-0.0763574	Compromised	0.221776	Compromised	0.0727091	0.689298	1.77	1.87	1.65	1.75	A_33_P3290610	Unknown
A_33_P3291150	-0.051527	Compromised	0.0515275	Compromised	2.385e-07	-0.07235	Compromised	0.236818	Compromised	0.0822341	0.663903	1.71	1.81	1.6	1.71	A_33_P3291150	Unknown
A_33_P3291160	0.371563	Detected	-0.371563	Detected	0	-0.760824	Detected	0.0129588	Detected	-0.373933	0.557875	32.1	18.9	13.9	20.5	A_33_P3291160	Unknown
A_33_P3291662	-0.0591793	Compromised	0.0591793	Compromised	0	-0.0704927	Compromised	0.229166	Compromised	0.0793366	0.671129	1.72	1.84	1.62	1.72	A_33_P3291662	Unknown
A_33_P3291772	0.37588	Detected	-0.375881	Compromised	-1.2e-07	-1.14071	Compromised	-0.666114	Compromised	-0.90341	0.179173	12.9	7.55	4.28	5.13	A_33_P3291772	Unknown
A_33_P3292158	-0.0555019	Compromised	0.0555015	Compromised	-2.39e-07	-0.0763249	Compromised	0.232843	Compromised	0.0782592	0.680714	1.71	1.82	1.6	1.71	A_33_P3292158	Unknown
A_33_P3292241	0.117389	Detected	-0.117389	Detected	0	0.204463	Detected	-0.36673	Detected	-0.0811336	0.81733	48	40.2	48.4	28.1	A_33_P3292241	Unknown
A_33_P3292994	0.414399	Detected	-0.414399	Compromised	1.25e-07	-0.913179	Compromised	0.216154	Detected	-0.348513	0.6681	12.4	6.88	4.69	8.85	A_33_P3292994	Unknown
A_33_P3293138	-0.0792825	Detected	0.0792823	Detected	-1.18e-07	0.457267	Detected	-0.0853844	Detected	0.185941	0.578256	13	14.3	17.9	10.6	A_33_P3293138	Unknown
A_33_P3293307	-0.0308995	Detected	0.0308995	Detected	0	-0.24454	Detected	-0.97358	Detected	-0.60906	0.237849	83.8	86.2	68.6	35.7	A_33_P3293307	Unknown
A_33_P3293466	-0.0636849	Compromised	0.0636854	Compromised	2.4e-07	-0.0760465	Compromised	0.233122	Compromised	0.0785377	0.68477	1.7	1.83	1.6	1.71	A_33_P3293466	Unknown
A_33_P3293645	0.228091	Detected	-0.228091	Compromised	0	0.523693	Detected	-0.374003	Compromised	0.0748447	0.895461	10.9	7.83	12.7	5.88	A_33_P3293645	Unknown
A_33_P3293698	-0.145575	Detected	0.145575	Detected	0	-0.291688	Detected	1.34686	Detected	0.527587	0.590902	10.2	12.3	8.75	23.5	A_33_P3293698	Unknown
A_33_P3293734	-0.021589	Detected	0.021589	Detected	0	0.0112989	Detected	0.119862	Detected	0.0655804	0.378264	971	986	943	877	A_33_P3293734	Unknown
A_33_P3294078	0.271286	Compromised	-0.271286	Compromised	-2.5e-07	-1.14931	Compromised	-1.484	Compromised	-1.31665	0.0539118	7.05	4.77	2.5	1.71	A_33_P3294078	Unknown
A_33_P3294089	0.0836334	Compromised	-0.0836329	Compromised	2.37e-07	-0.20672	Compromised	0.416679	Compromised	0.104979	0.775839	2.86	2.51	2.22	2.95	A_33_P3294089	Unknown
A_33_P3294103	-0.653971	Compromised	0.653971	Compromised	0	-0.845756	Compromised	-0.333917	Compromised	-0.589836	0.489363	2.25	5.49	1.87	2.3	A_33_P3294103	Unknown
A_33_P3294314	0.357029	Compromised	-0.35703	Compromised	-2.3e-07	0.614006	Compromised	-0.809909	Compromised	-0.0979517	0.913365	5.21	3.13	5.91	1.9	A_33_P3294314	Unknown
A_33_P3294342	-0.0288868	Compromised	0.0288863	Compromised	-2.385e-07	-0.144307	Compromised	0.151399	Compromised	0.00354576	0.983358	1.94	1.99	1.7	1.8	A_33_P3294342	Unknown
A_33_P3294415	0.331718	Detected	-0.331718	Compromised	0	-0.155874	Detected	-0.309038	Compromised	-0.232456	0.56521	13.5	8.4	9.14	7.09	A_33_P3294415	Unknown
A_33_P3294730	-0.0401287	Compromised	0.0401282	Compromised	-2.39e-07	-0.133065	Compromised	0.162641	Compromised	0.0147877	0.931904	1.91	1.99	1.7	1.8	A_33_P3294730	Unknown
A_33_P3295077	-0.249858	Detected	0.249857	Detected	-1.15e-07	-0.0502112	Detected	0.355678	Detected	0.152733	0.681914	12.2	17	13.3	15.2	A_33_P3295077	Unknown
A_33_P3295623	-0.404295	Compromised	0.404295	Compromised	0	-1.14808	Compromised	-0.855981	Compromised	-1.00203	0.145041	3.14	5.42	1.78	1.88	A_33_P3295623	Unknown
A_33_P3295705	0.0370479	Detected	-0.0370479	Detected	0	-0.10259	Detected	-0.039371	Detected	-0.0709803	0.282316	37.6	35.2	32.4	29.2	A_33_P3295705	Unknown
A_33_P3295814	-0.0644014	Detected	0.0644014	Detected	0	-0.174251	Detected	-0.0123374	Detected	-0.0932941	0.462323	74.8	80.6	65.8	63.5	A_33_P3295814	Unknown
A_33_P3295932	-0.0330358	Detected	0.0330358	Detected	0	0.392165	Detected	-0.0489473	Detected	0.171609	0.522058	28.4	29.3	36.2	23	A_33_P3295932	Unknown
A_33_P3296099	-0.357538	Compromised	0.357538	Compromised	0	-1.78333	Compromised	0.00576973	Compromised	-0.888782	0.453618	4.5	7.28	1.59	4.74	A_33_P3296099	Unknown
A_33_P3296313	0.683093	Compromised	-0.683093	Compromised	0	-0.815204	Compromised	-0.518058	Compromised	-0.666631	0.440925	4.97	1.9	1.67	1.77	A_33_P3296313	Unknown
A_33_P3296348	-0.048965	Compromised	0.048965	Compromised	0	-0.0857563	Compromised	0.180786	Compromised	0.0475147	0.769723	2.01	2.12	1.86	1.93	A_33_P3296348	Unknown
A_33_P3296696	-0.0392451	Compromised	0.0392446	Compromised	-2.4e-07	-0.151567	Compromised	1.3886	Compromised	0.618516	0.506637	1.97	2.05	1.73	4.34	A_33_P3296696	Unknown
A_33_P3296721	-0.0766547	Detected	0.0766544	Detected	-1.18e-07	0.0770564	Detected	0.493834	Detected	0.285445	0.327353	12.5	13.7	13.2	15.2	A_33_P3296721	Unknown
A_33_P3296769	0.167752	Detected	-0.167752	Compromised	0	-0.60346	Compromised	-0.293207	Compromised	-0.448333	0.188745	13.7	10.7	7.62	8.15	A_33_P3296769	Unknown
A_33_P3297150	-0.861403	Compromised	0.861403	Compromised	2.35e-07	0.108088	Compromised	-0.564596	Compromised	-0.228254	0.828063	1.7	5.53	3.16	1.71	A_33_P3297150	Unknown
A_33_P3297280	-0.0477219	Compromised	0.0477214	Compromised	-2.385e-07	-0.0754313	Compromised	0.21754	Compromised	0.0710542	0.68995	1.89	1.99	1.76	1.86	A_33_P3297280	Unknown
A_33_P3297297	-0.0386844	Compromised	0.0386844	Compromised	0	-0.138901	Compromised	0.168465	Compromised	0.014782	0.934188	2.01	2.09	1.78	1.9	A_33_P3297297	Unknown
A_33_P3297310	0.189092	Compromised	-0.189092	Compromised	2.4e-07	0.287817	Detected	0.587145	Detected	0.437481	0.211329	8.48	6.43	8.62	9.15	A_33_P3297310	Unknown
A_33_P3297360	-0.0377545	Compromised	0.0377545	Compromised	0	-0.0954084	Compromised	0.202228	Compromised	0.0534098	0.761137	1.82	1.89	1.66	1.76	A_33_P3297360	Unknown
A_33_P3297655	-0.0597324	Compromised	0.0597324	Compromised	0	0.198435	Compromised	0.237074	Compromised	0.217755	0.0740091	1.7	1.82	1.93	1.71	A_33_P3297655	Unknown
A_33_P3297808	0.221344	Compromised	-0.221344	Compromised	2.4e-07	-0.35317	Compromised	-0.0695367	Compromised	-0.211353	0.505774	2.51	1.82	1.6	1.68	A_33_P3297808	Unknown
A_33_P3297818	-0.0633855	Compromised	0.0633855	Compromised	0	0.36865	Compromised	0.233372	Compromised	0.301011	0.0831742	1.71	1.84	2.19	1.72	A_33_P3297818	Unknown
A_33_P3297834	0.142873	Compromised	-0.142873	Compromised	0	-0.310086	Compromised	0.0180221	Compromised	-0.146032	0.571195	2.61	2.11	1.81	1.96	A_33_P3297834	Unknown
A_33_P3298251	0.138581	Detected	-0.138581	Detected	0	-0.172672	Detected	0.271055	Detected	0.0491915	0.868189	33.2	27	25.4	29.8	A_33_P3298251	Unknown
A_33_P3298267	0.224585	Detected	-0.224585	Compromised	0	-0.339631	Compromised	-0.0854301	Compromised	-0.21253	0.496756	11.9	8.59	7.64	7.86	A_33_P3298267	Unknown
A_33_P3298398	-0.0508399	Compromised	0.0508399	Compromised	0	-0.0877652	Compromised	0.22919	Compromised	0.0707123	0.712275	1.74	1.84	1.61	1.73	A_33_P3298398	Unknown
A_33_P3298552	0.0945551	Detected	-0.0945551	Detected	0	0.185674	Detected	0.362043	Detected	0.273859	0.168339	627	542	634	618	A_33_P3298552	Unknown
A_33_P3298612	-0.995471	Compromised	0.995471	Detected	0	0.699926	Detected	-1.61253	Compromised	-0.4563	0.7931	6.05	23.7	18.6	3.23	A_33_P3298612	Unknown
A_33_P3298955	-0.108969	Compromised	0.108969	Compromised	0	0.04671	Compromised	-0.942392	Compromised	-0.447841	0.469805	3.83	4.39	4.05	1.76	A_33_P3298955	Unknown
A_33_P3298980	-0.0412309	Detected	0.0412309	Detected	0	0.712655	Detected	0.319403	Detected	0.516029	0.124001	25.3	26.4	40.5	26.6	A_33_P3298980	Unknown
A_33_P3299042	-0.177022	Detected	0.177022	Detected	0	-0.885884	Compromised	0.341621	Detected	-0.272132	0.71156	10.4	13.1	6.04	12.2	A_33_P3299042	Unknown
A_33_P3299047	-0.0449538	Detected	0.0449538	Detected	0	-0.145984	Detected	0.254782	Detected	0.054399	0.815895	75.7	79.4	67	76.3	A_33_P3299047	Unknown
A_33_P3299125	-0.062952	Compromised	0.062952	Compromised	0	-0.0775804	Compromised	0.434259	Compromised	0.178339	0.568378	1.99	2.14	1.87	2.3	A_33_P3299125	Unknown
A_33_P3299130	0.233875	Detected	-0.233875	Detected	0	0.059911	Detected	-0.163672	Detected	-0.0518804	0.859875	111	79.1	93.4	69	A_33_P3299130	Unknown
A_33_P3299376	-0.0284309	Compromised	0.0284314	Compromised	2.385e-07	-0.180563	Compromised	0.107106	Compromised	-0.0367286	0.825579	1.99	2.04	1.7	1.79	A_33_P3299376	Unknown
A_33_P3299436	0.128452	Detected	-0.128452	Detected	0	-0.114807	Detected	0.0178585	Detected	-0.0484743	0.7693	101000	83300	81000	76599.9	A_33_P3299436	Unknown
A_33_P3299495	-0.034379	Compromised	0.034379	Compromised	0	-0.274151	Compromised	-0.298036	Compromised	-0.286093	0.0158001	7.14	7.38	5.74	4.87	A_33_P3299495	Unknown
A_33_P3299750	-0.0391431	Compromised	0.0391431	Compromised	0	0.11703	Compromised	0.189613	Compromised	0.153322	0.102846	1.73	1.8	1.83	1.66	A_33_P3299750	Unknown
A_33_P3299972	-0.0505152	Compromised	0.0505147	Compromised	-2.385e-07	-0.0680251	Compromised	0.176755	Compromised	0.0543649	0.721178	1.93	2.04	1.81	1.85	A_33_P3299972	Unknown
A_33_P3300022	0.507281	Compromised	-0.507281	Compromised	0	-0.632211	Compromised	-0.322459	Compromised	-0.477335	0.463123	3.69	1.8	1.59	1.7	A_33_P3300022	Unknown
A_33_P3300032	-0.661008	Compromised	0.661008	Compromised	0	-0.767967	Compromised	-0.464781	Compromised	-0.616374	0.45935	1.94	4.78	1.71	1.82	A_33_P3300032	Unknown
A_33_P3300117	-0.2584	Detected	0.2584	Detected	0	-0.159353	Detected	-0.347359	Detected	-0.253356	0.454111	23.9	33.7	24.3	18.4	A_33_P3300117	Unknown
A_33_P3300179	-0.00800395	Detected	0.00800395	Detected	0	-0.228588	Detected	-0.121307	Detected	-0.174948	0.0841495	57.2	57	46.6	43.3	A_33_P3300179	Unknown
A_33_P3300591	-0.0285206	Compromised	0.0285201	Compromised	-2.385e-07	-0.107042	Compromised	0.177362	Compromised	0.0351601	0.831042	1.98	2.03	1.78	1.87	A_33_P3300591	Unknown
A_33_P3300877	-0.0332134	Detected	0.0332134	Detected	0	-0.0684226	Detected	0.0347416	Detected	-0.0168405	0.809457	72	74.3	66.7	61.8	A_33_P3300877	Unknown
A_33_P3301095	0.168078	Detected	-0.168078	Detected	0	0.0359025	Detected	-0.21416	Detected	-0.0891287	0.711903	269	210	233	169	A_33_P3301095	Unknown
A_33_P3301097	0.0556228	Detected	-0.0556228	Detected	0	-0.138272	Detected	-0.877433	Compromised	-0.507852	0.307154	19.4	17.7	16.1	8.32	A_33_P3301097	Unknown
A_33_P3301124	0.936723	Compromised	-0.936722	Compromised	2.3e-07	0.317342	Compromised	1.07858	Compromised	0.697962	0.56135	7.25	1.95	4.48	6.55	A_33_P3301124	Unknown
A_33_P3301129	-0.844786	Compromised	0.844786	Compromised	0	0.32672	Compromised	0.359026	Compromised	0.342873	0.724189	2.46	7.82	5.26	4.64	A_33_P3301129	Unknown
A_33_P3301445	-0.0681074	Detected	0.0681074	Detected	0	-0.0707743	Detected	-0.436955	Detected	-0.253865	0.323373	686	743	650	435	A_33_P3301445	Unknown
A_33_P3301509	-0.0467062	Compromised	0.0467062	Compromised	0	-0.0740876	Compromised	0.233372	Compromised	0.0796421	0.669223	1.75	1.84	1.63	1.74	A_33_P3301509	Unknown
A_33_P3301876	0.00749207	Detected	-0.00749207	Detected	0	0.137735	Detected	-0.0121069	Detected	0.062814	0.491916	77	75.1	80	62.2	A_33_P3301876	Unknown
A_33_P3301980	0.331891	Compromised	-0.331891	Compromised	0	-0.47716	Compromised	-0.177501	Compromised	-0.32733	0.46357	2.99	1.86	1.62	1.72	A_33_P3301980	Unknown
A_33_P3302390	0.021421	Detected	-0.021421	Detected	0	0.174393	Detected	-0.134741	Detected	0.0198262	0.910519	57.7	55.2	60.9	42.4	A_33_P3302390	Unknown
A_33_P3303302	0.102787	Detected	-0.102787	Detected	0	0.0343344	Detected	0.215636	Detected	0.124985	0.458054	45.4	38.8	41.1	40.2	A_33_P3303302	Unknown
A_33_P3303361	-0.254481	Compromised	0.254481	Compromised	1.2e-07	-2.07494	Compromised	-0.775658	Compromised	-1.4253	0.177797	6.66	9.34	1.79	3.8	A_33_P3303361	Unknown
A_33_P3303394	0.0693264	Detected	-0.0693269	Detected	-2.4e-07	0.19631	Detected	0.154581	Detected	0.175445	0.136314	7920	7090	8210	6880	A_33_P3303394	Unknown
A_33_P3303469	-0.0172143	Detected	0.0172143	Detected	0	-0.449578	Detected	-0.0837855	Detected	-0.266682	0.283708	75.2	75.9	52.9	58.8	A_33_P3303469	Unknown
A_33_P3303557	0.57159	Detected	-0.57159	Compromised	0	0.68005	Detected	-1.94321	Compromised	-0.631579	0.702041	17.1	7.63	17.5	2.45	A_33_P3303557	Unknown
A_33_P3303562	0.0960708	Detected	-0.0960708	Detected	0	-0.467795	Detected	-0.504723	Detected	-0.486259	0.0381736	31.3	27	20.1	16.9	A_33_P3303562	Unknown
A_33_P3303752	-0.792975	Compromised	0.792976	Compromised	2.5e-07	0.672663	Compromised	0.457502	Compromised	0.565082	0.553275	1.93	5.71	5.06	3.76	A_33_P3303752	Unknown
A_33_P3304092	0.40969	Compromised	-0.40969	Compromised	0	-0.109671	Compromised	-1.51293	Compromised	-0.811298	0.423211	8.38	4.68	5.55	1.81	A_33_P3304092	Unknown
A_33_P3304097	-0.117545	Detected	0.117545	Detected	0	0.351593	Detected	-0.377116	Detected	-0.0127614	0.976437	51.9	60.2	68.2	35.5	A_33_P3304097	Unknown
A_33_P3304182	-0.0524149	Compromised	0.0524149	Compromised	0	-0.0746107	Compromised	0.212214	Compromised	0.0688016	0.696418	1.84	1.95	1.72	1.81	A_33_P3304182	Unknown
A_33_P3304369	-0.0483806	Detected	0.0483806	Detected	0	-0.0634768	Detected	-0.154176	Detected	-0.108826	0.242464	297	313	279	226	A_33_P3304369	Unknown
A_33_P3304402	-0.0526371	Compromised	0.0526371	Compromised	0	-0.0669708	Compromised	0.219854	Compromised	0.0764415	0.666442	1.83	1.94	1.72	1.81	A_33_P3304402	Unknown
A_33_P3304748	-0.0249579	Detected	0.0249579	Detected	0	0.253677	Detected	0.157593	Detected	0.205635	0.0628492	29.7	30.3	34.2	27.6	A_33_P3304748	Unknown
A_33_P3304769	-0.166188	Compromised	0.166188	Compromised	0	-0.192782	Compromised	0.0604286	Compromised	-0.0661767	0.781434	1.91	2.37	1.78	1.83	A_33_P3304769	Unknown
A_33_P3304998	-0.0512953	Compromised	0.0512958	Compromised	2.385e-07	0.391957	Compromised	0.23705	Compromised	0.314504	0.0772739	1.72	1.82	2.22	1.72	A_33_P3304998	Unknown
A_33_P3305250	0.11691	Detected	-0.11691	Detected	0	-0.355477	Detected	-0.543112	Detected	-0.449295	0.0956129	24.7	20.7	16.9	12.8	A_33_P3305250	Unknown
A_33_P3305335	-0.0467873	Compromised	0.0467868	Compromised	-2.385e-07	-0.071753	Compromised	0.188539	Compromised	0.0583932	0.713922	1.94	2.04	1.81	1.87	A_33_P3305335	Unknown
A_33_P3305438	0.186549	Detected	-0.186549	Detected	0	-0.143607	Detected	-0.607321	Detected	-0.375464	0.334277	34.3	26.1	25.9	16.2	A_33_P3305438	Unknown
A_33_P3305462	-0.163787	Compromised	0.163787	Compromised	-2.35e-07	-0.330962	Compromised	-0.0375471	Compromised	-0.184254	0.49024	2.07	2.56	1.75	1.85	A_33_P3305462	Unknown
A_33_P3305526	-0.0391026	Compromised	0.0391026	Compromised	0	-0.0935121	Compromised	0.189742	Compromised	0.048115	0.774407	1.98	2.06	1.81	1.9	A_33_P3305526	Unknown
A_33_P3305710	0.701249	Compromised	-0.701249	Compromised	2.25e-07	-0.21349	Compromised	-0.454624	Compromised	-0.334057	0.684931	5.66	2.11	2.85	2.08	A_33_P3305710	Unknown
A_33_P3305820	1.71103	Detected	-1.71103	Compromised	-2.5e-07	-1.85602	Compromised	-0.157959	Compromised	-1.00699	0.650699	21.1	1.94	1.69	4.73	A_33_P3305820	Unknown
A_33_P3306063	-0.0512953	Compromised	0.0512958	Compromised	2.385e-07	-0.0805306	Compromised	0.228638	Compromised	0.0740535	0.693929	1.72	1.82	1.6	1.71	A_33_P3306063	Unknown
A_33_P3306327	0.0454156	Detected	-0.0454156	Detected	0	0.00862432	Detected	0.035857	Detected	0.0222406	0.685174	1340	1240	1240	1090	A_33_P3306327	Unknown
A_33_P3306339	0.0067687	Compromised	-0.0067687	Compromised	0	-0.147376	Compromised	0.181345	Compromised	0.0169847	0.927185	2.11	2.06	1.8	1.95	A_33_P3306339	Unknown
A_33_P3306363	-0.0850072	Compromised	0.0850074	Detected	1.2e-07	-0.504809	Compromised	-1.18803	Compromised	-0.846418	0.138043	9.47	10.5	6.72	3.61	A_33_P3306363	Unknown
A_33_P3306526	0.0627661	Detected	-0.0627651	Detected	4.775e-07	0.0255833	Detected	0.196784	Detected	0.111184	0.404813	41400	37400	38300	37200	A_33_P3306526	Unknown
A_33_P3307063	0.393681	Compromised	-0.393681	Compromised	0	-0.548393	Compromised	-0.24312	Compromised	-0.395757	0.447554	3.38	1.93	1.67	1.78	A_33_P3307063	Unknown
A_33_P3307088	-0.294146	Compromised	0.294145	Compromised	-2.4e-07	1.33023	Compromised	-0.0286403	Compromised	0.650796	0.472108	1.91	2.83	5.59	1.88	A_33_P3307088	Unknown
A_33_P3307192	-0.222567	Compromised	0.222566	Compromised	-2.35e-07	-0.374699	Compromised	0.594061	Compromised	0.109681	0.856025	1.99	2.67	1.7	2.87	A_33_P3307192	Unknown
A_33_P3307402	-0.0582404	Detected	0.0582404	Detected	0	0.490792	Detected	-0.373473	Detected	0.0586594	0.905302	23.4	25	32.5	15.4	A_33_P3307402	Unknown
A_33_P3307408	0.458922	Compromised	-0.458922	Compromised	0	-0.283462	Compromised	0.216345	Compromised	-0.0335586	0.954636	3.93	2.05	2.23	2.72	A_33_P3307408	Unknown
A_33_P3308147	-0.202787	Compromised	0.202787	Compromised	-2.4e-07	-0.325416	Compromised	-0.0251889	Compromised	-0.175303	0.559041	2.03	2.65	1.77	1.88	A_33_P3308147	Unknown
A_33_P3308153	-0.125044	Detected	0.125044	Detected	0	0.231078	Detected	0.475892	Detected	0.353485	0.180796	186	218	226	231	A_33_P3308153	Unknown
A_33_P3309643	-0.00103903	Detected	0.00103903	Detected	0	-0.363146	Detected	-0.215194	Detected	-0.28917	0.0596604	153	151	113	108	A_33_P3309643	Unknown
A_33_P3309656	-0.0545044	Compromised	0.0545049	Compromised	2.375e-07	-0.00434923	Compromised	0.496875	Compromised	0.246263	0.438277	1.75	1.86	1.72	2.1	A_33_P3309656	Unknown
A_33_P3309849	-0.0902085	Detected	0.0902085	Detected	0	-0.218322	Detected	-0.241684	Detected	-0.230003	0.127231	137	153	119	101	A_33_P3309849	Unknown
A_33_P3310198	-0.0517616	Compromised	0.0517616	Compromised	0	-0.0731683	Compromised	0.236584	Compromised	0.0817077	0.666451	1.7	1.8	1.59	1.7	A_33_P3310198	Unknown
A_33_P3310296	0.0311773	Detected	-0.0311773	Detected	0	0.372012	Detected	0.33163	Detected	0.351821	0.0109637	35.6	33.6	42.8	35.9	A_33_P3310296	Unknown
A_33_P3310327	-0.0479145	Compromised	0.0479145	Compromised	0	-0.118011	Compromised	0.185688	Compromised	0.0338383	0.851399	1.88	1.98	1.7	1.81	A_33_P3310327	Unknown
A_33_P3310401	0.555091	Compromised	-0.555092	Compromised	-2.3e-07	-0.705742	Compromised	-0.398839	Compromised	-0.55229	0.438763	4.14	1.89	1.64	1.75	A_33_P3310401	Unknown
A_33_P3310409	-0.0105305	Compromised	0.0105309	Compromised	2.385e-07	1.47151	Compromised	0.204192	Compromised	0.837852	0.317095	2.01	2.01	5.33	1.91	A_33_P3310409	Unknown
A_33_P3310512	0.128978	Detected	-0.128978	Detected	0	-0.190724	Detected	-0.175302	Detected	-0.183013	0.292343	47.2	38.9	35.9	31.3	A_33_P3310512	Unknown
A_33_P3310751	0.0919218	Detected	-0.0919218	Detected	0	-0.554941	Detected	-0.0197682	Detected	-0.287354	0.416684	57.4	49.8	34.8	43.5	A_33_P3310751	Unknown
A_33_P3310754	0.602471	Detected	-0.602471	Compromised	-1.25e-07	-0.393899	Compromised	-0.726977	Compromised	-0.560438	0.464548	12	5.13	5.71	3.91	A_33_P3310754	Unknown
A_33_P3311001	-0.751357	Compromised	0.751357	Compromised	0	-1.09521	Compromised	0.498356	Compromised	-0.298426	0.810799	2.46	6.87	1.84	4.79	A_33_P3311001	Unknown
A_33_P3311308	0.180324	Compromised	-0.180324	Compromised	0	0.513126	Compromised	-0.0360508	Compromised	0.238538	0.543238	2.71	2.08	3.24	1.91	A_33_P3311308	Unknown
A_33_P3311458	0.114149	Detected	-0.114149	Detected	0	-0.385443	Detected	-0.394877	Detected	-0.39016	0.0760862	1260	1060	846	725	A_33_P3311458	Unknown
A_33_P3311646	0.0715294	Detected	-0.0715289	Detected	2.4e-07	-0.163709	Detected	0.0686436	Detected	-0.0475328	0.760793	2790	2490	2250	2280	A_33_P3311646	Unknown
A_33_P3311648	-0.0499587	Compromised	0.0499582	Compromised	-2.38e-07	-0.0930386	Compromised	0.222085	Compromised	0.0645232	0.733924	1.78	1.88	1.64	1.76	A_33_P3311648	Unknown
A_33_P3311711	0.0136895	Compromised	-0.013689	Compromised	2.385e-07	-0.155313	Compromised	0.181445	Compromised	0.0130658	0.945393	2.12	2.05	1.79	1.95	A_33_P3311711	Unknown
A_33_P3311855	-0.0521946	Compromised	0.0521951	Compromised	2.385e-07	-0.0738468	Compromised	0.204615	Compromised	0.0653839	0.70309	1.85	1.96	1.73	1.81	A_33_P3311855	Unknown
A_33_P3311911	0.110254	Compromised	-0.110254	Compromised	-2.4e-07	0.128648	Compromised	-0.0424147	Compromised	0.0431166	0.786546	4.67	3.95	4.49	3.44	A_33_P3311911	Unknown
A_33_P3311920	-0.348612	Compromised	0.348612	Compromised	0	-0.376321	Compromised	-0.0911274	Compromised	-0.233724	0.598193	1.89	3.02	1.76	1.85	A_33_P3311920	Unknown
A_33_P3311966	0.507184	Compromised	-0.507185	Compromised	-2.5e-07	1.26618	Compromised	-0.321894	Compromised	0.472142	0.666009	3.71	1.81	5.96	1.71	A_33_P3311966	Unknown
A_33_P3312044	-0.0772724	Compromised	0.0772719	Compromised	-2.375e-07	0.111039	Compromised	0.997242	Compromised	0.554141	0.343138	1.96	2.15	2.12	3.38	A_33_P3312044	Unknown
A_33_P3312147	0.842534	Detected	-0.842534	Compromised	0	-1.80163	Compromised	0.531821	Compromised	-0.634904	0.702199	10.8	3.31	1.64	7.13	A_33_P3312147	Unknown
A_33_P3312187	-0.532842	Compromised	0.532842	Compromised	0	-0.0751677	Compromised	0.949564	Compromised	0.437198	0.614173	1.91	3.94	2.49	4.37	A_33_P3312187	Unknown
A_33_P3312251	-0.244093	Compromised	0.244094	Compromised	2.4e-07	-0.775328	Compromised	-0.583779	Compromised	-0.679554	0.122189	3.06	4.23	2.01	1.98	A_33_P3312251	Unknown
A_33_P3312342	-0.0217147	Compromised	0.0217147	Compromised	0	-0.113723	Compromised	0.173521	Compromised	0.0298989	0.855968	1.92	1.95	1.71	1.8	A_33_P3312342	Unknown
A_33_P3312436	-0.0388222	Compromised	0.0388227	Compromised	2.38e-07	-0.0930037	Compromised	0.199192	Compromised	0.0530939	0.75897	1.75	1.82	1.6	1.69	A_33_P3312436	Unknown
A_33_P3312774	0.130176	Compromised	-0.130176	Compromised	0	-0.282587	Compromised	0.0296235	Compromised	-0.126482	0.597255	2.37	1.95	1.69	1.81	A_33_P3312774	Unknown
A_33_P3312784	0.261514	Detected	-0.261514	Detected	0	-0.307586	Detected	-0.489362	Detected	-0.398474	0.286711	26.1	17.9	16.7	12.7	A_33_P3312784	Unknown
A_33_P3312886	0.383317	Compromised	-0.383318	Compromised	-2.4e-07	-0.515429	Compromised	1.25663	Compromised	0.370598	0.738032	3.28	1.9	1.67	4.92	A_33_P3312886	Unknown
A_33_P3313075	0.487463	Compromised	-0.487463	Compromised	2.4e-07	-0.558953	Compromised	-0.30264	Compromised	-0.430797	0.482757	3.59	1.8	1.65	1.7	A_33_P3313075	Unknown
A_33_P3313095	0.950468	Compromised	-0.950468	Compromised	0	-0.296359	Compromised	-0.777306	Compromised	-0.536832	0.638938	7.2	1.9	2.88	1.78	A_33_P3313095	Unknown
A_33_P3313323	0.0853643	Compromised	-0.0853648	Compromised	-2.4e-07	-0.252578	Compromised	0.0681505	Compromised	-0.0922139	0.66218	2.41	2.11	1.81	1.95	A_33_P3313323	Unknown
A_33_P3313552	-0.165565	Compromised	0.165565	Compromised	0	1.2861	Compromised	1.79239	Compromised	1.53925	0.0365149	1.71	2.12	4.44	5.44	A_33_P3313552	Unknown
A_33_P3313625	-0.0858703	Detected	0.0858703	Detected	0	-0.767726	Compromised	-0.141123	Compromised	-0.454424	0.296766	10.9	12.1	6.45	8.59	A_33_P3313625	Unknown
A_33_P3313640	-0.442855	Compromised	0.442855	Compromised	0	0.946979	Compromised	1.56076	Compromised	1.25387	0.145423	2.01	3.66	5	6.6	A_33_P3313640	Unknown
A_33_P3313652	0.24785	Detected	-0.24785	Detected	0	0.0148292	Detected	0.0221686	Detected	0.0184989	0.947302	75.4	52.7	60.9	52.8	A_33_P3313652	Unknown
A_33_P3313695	-0.366106	Compromised	0.366107	Detected	2.35e-07	-1.24209	Compromised	-0.322435	Compromised	-0.782265	0.31467	6.09	9.97	3.15	5.14	A_33_P3313695	Unknown
A_33_P3314121	-0.021657	Compromised	0.0216575	Compromised	2.385e-07	-0.112748	Compromised	0.174077	Compromised	0.0306647	0.852145	1.93	1.96	1.72	1.81	A_33_P3314121	Unknown
A_33_P3314352	-0.0808296	Compromised	0.0808301	Compromised	2.4e-07	-1.91546	Compromised	-1.40266	Compromised	-1.65906	0.0252673	6.35	7	1.69	2.08	A_33_P3314352	Unknown
A_33_P3314574	0.311701	Compromised	-0.311701	Compromised	-2.4e-07	-1.01374	Compromised	1.25917	Detected	0.122717	0.926563	5.94	3.8	2.25	9.38	A_33_P3314574	Unknown
A_33_P3314828	-0.0355926	Compromised	0.0355926	Compromised	0	-0.146904	Compromised	0.146958	Compromised	2.694e-05	0.999874	1.98	2.05	1.74	1.84	A_33_P3314828	Unknown
A_33_P3315074	-0.0619104	Detected	0.0619104	Detected	0	0.386479	Detected	-0.521871	Detected	-0.0676961	0.896134	149	160	193	88.7	A_33_P3315074	Unknown
A_33_P3315154	2.3982	Detected	-2.3982	Compromised	0	-2.52001	Compromised	-2.21198	Compromised	-2.366	0.428645	51.6	1.83	1.62	1.73	A_33_P3315154	Unknown
A_33_P3315624	-0.0475311	Compromised	0.0475307	Compromised	-2.39e-07	0.442608	Compromised	1.10373	Compromised	0.77317	0.14662	1.71	1.8	2.28	3.11	A_33_P3315624	Unknown
A_33_P3315634	0.03142	Detected	-0.03142	Detected	0	-0.117911	Detected	0.218482	Detected	0.0502856	0.796538	35.4	33.4	30.3	33	A_33_P3315634	Unknown
A_33_P3315659	-0.0276661	Compromised	0.0276656	Compromised	-2.385e-07	0.369363	Compromised	0.160152	Compromised	0.264758	0.134205	2.08	2.13	2.6	1.94	A_33_P3315659	Unknown
A_33_P3315704	-0.36709	Compromised	0.36709	Detected	-1.15e-07	-0.0528011	Detected	-0.0413916	Compromised	-0.0470964	0.909663	9.15	15	10.8	9.39	A_33_P3315704	Unknown
A_33_P3315724	-0.0552483	Compromised	0.0552483	Compromised	0	-0.0665617	Compromised	0.233097	Compromised	0.0832677	0.654059	1.72	1.83	1.62	1.72	A_33_P3315724	Unknown
A_33_P3315763	0.0574865	Detected	-0.0574875	Detected	-4.77e-07	-0.0611095	Detected	-0.104749	Detected	-0.0829291	0.309859	58900	53600	51500	43100	A_33_P3315763	Unknown
A_33_P3315824	0.00325346	Detected	-0.00325346	Detected	0	-0.269982	Detected	0.502896	Detected	0.116457	0.791594	31.7	31.1	24.9	36.7	A_33_P3315824	Unknown
A_33_P3315836	-0.111348	Detected	0.111348	Detected	0	-0.183249	Detected	-2.08965	Compromised	-1.13645	0.357999	32	36.8	28.9	6.65	A_33_P3315836	Unknown
A_33_P3315899	0.00329757	Detected	-0.00329757	Detected	0	-0.0554569	Detected	0.808041	Detected	0.376292	0.47536	1580	1550	1440	2260	A_33_P3315899	Unknown
A_33_P3315915	-0.447765	Detected	0.447765	Detected	0	-1.04284	Compromised	-0.23491	Detected	-0.638874	0.400461	10.2	18.7	6.41	9.68	A_33_P3315915	Unknown
A_33_P3315986	-0.280166	Detected	0.280166	Detected	1.25e-07	-0.346726	Detected	0.650789	Detected	0.152032	0.815311	13.9	20.2	12.6	21.7	A_33_P3315986	Unknown
A_33_P3316093	-0.0660467	Compromised	0.0660462	Compromised	-2.375e-07	-0.0649462	Compromised	0.193152	Compromised	0.0641031	0.701573	2	2.16	1.9	1.96	A_33_P3316093	Unknown
A_33_P3316178	-0.512649	Compromised	0.51265	Compromised	2.4e-07	-0.525011	Compromised	-0.215842	Compromised	-0.370426	0.560578	1.7	3.41	1.6	1.71	A_33_P3316178	Unknown
A_33_P3316248	0.111679	Detected	-0.111679	Detected	0	0.129447	Detected	0.210053	Detected	0.16975	0.289045	15.4	13	14.8	13.5	A_33_P3316248	Unknown
A_33_P3316261	-0.0493221	Compromised	0.0493226	Compromised	2.375e-07	-0.0731869	Compromised	0.222993	Compromised	0.0749032	0.67867	1.81	1.91	1.69	1.79	A_33_P3316261	Unknown
A_33_P3316379	0.0326548	Detected	-0.0326543	Detected	2.385e-07	0.0723939	Detected	0.197056	Detected	0.134725	0.195637	4130	3890	4030	3790	A_33_P3316379	Unknown
A_33_P3316572	-0.0508399	Compromised	0.0508399	Compromised	0	-0.0699539	Compromised	0.237505	Compromised	0.0837758	0.656418	1.74	1.84	1.63	1.74	A_33_P3316572	Unknown
A_33_P3316671	0.0108442	Detected	-0.0108442	Detected	0	0.235841	Detected	-0.614959	Detected	-0.189559	0.699566	137	133	152	72.7	A_33_P3316671	Unknown
A_33_P3316691	-0.100764	Detected	0.100764	Detected	0	-0.398795	Detected	-0.137495	Detected	-0.268145	0.245626	80.3	91	62	64.1	A_33_P3316691	Unknown
A_33_P3316696	0.0616643	Detected	-0.0616643	Detected	0	-0.491266	Detected	-0.124146	Detected	-0.307706	0.252992	35.7	32.3	23.1	25.7	A_33_P3316696	Unknown
A_33_P3317460	0.0083909	Detected	-0.0083909	Detected	0	-0.17395	Detected	-0.126104	Detected	-0.150027	0.0273876	61.8	60.2	51.7	46.1	A_33_P3317460	Unknown
A_33_P3317548	-0.626467	Compromised	0.626467	Compromised	0	-0.619537	Compromised	0.848963	Compromised	0.114713	0.916255	1.95	4.58	1.86	4.44	A_33_P3317548	Unknown
A_33_P3317761	-0.151477	Detected	0.151477	Detected	0	-0.00960684	Detected	-0.0666657	Detected	-0.0381362	0.82767	19	23.1	19.9	16.5	A_33_P3317761	Unknown
A_33_P3318069	0.209755	Compromised	-0.209755	Compromised	0	-0.126569	Compromised	0.119951	Compromised	-0.00330925	0.990382	3.99	2.94	3	3.07	A_33_P3318069	Unknown
A_33_P3318227	-0.0491147	Compromised	0.0491147	Compromised	0	-0.0639553	Compromised	0.223289	Compromised	0.0796669	0.65206	1.82	1.92	1.71	1.8	A_33_P3318227	Unknown
A_33_P3318377	-0.132898	Detected	0.132898	Detected	0	-0.045723	Detected	-0.0528693	Detected	-0.0492961	0.746379	119	141	120	103	A_33_P3318377	Unknown
A_33_P3318384	-0.245602	Detected	0.245602	Detected	-1.2e-07	0.316615	Detected	0.763058	Detected	0.539836	0.245349	12.2	16.9	17.1	20.1	A_33_P3318384	Unknown
A_33_P3318736	0.440737	Compromised	-0.440736	Compromised	2.35e-07	1.22223	Compromised	-0.318224	Compromised	0.452004	0.661143	3.72	1.99	6.07	1.8	A_33_P3318736	Unknown
A_33_P3318766	0.206296	Detected	-0.206296	Detected	0	0.472742	Detected	-0.457605	Detected	0.00756812	0.989484	41.6	30.8	47.5	21.5	A_33_P3318766	Unknown
A_33_P3318781	-0.0512953	Compromised	0.0512958	Compromised	2.385e-07	-0.0805306	Compromised	0.220176	Compromised	0.0698228	0.703218	1.72	1.82	1.6	1.7	A_33_P3318781	Unknown
A_33_P3319502	-0.0870066	Detected	0.0870066	Detected	0	-0.151309	Detected	0.103158	Detected	-0.024075	0.890223	152	169	138	142	A_33_P3319502	Unknown
A_33_P3319937	0.0680017	Detected	-0.0680013	Detected	2.4e-07	0.0710588	Detected	0.310143	Detected	0.190601	0.300083	34900	31300	33200	33800	A_33_P3319937	Unknown
A_33_P3319953	0.790755	Compromised	-0.790755	Compromised	0	-0.0777521	Compromised	0.561309	Compromised	0.241779	0.803454	5.77	1.9	3	4.03	A_33_P3319953	Unknown
A_33_P3320241	-0.495344	Compromised	0.495344	Compromised	2.3e-07	-0.683277	Compromised	-0.38257	Compromised	-0.532923	0.411467	1.92	3.76	1.6	1.7	A_33_P3320241	Unknown
A_33_P3320283	-0.0597324	Compromised	0.0597324	Compromised	0	1.22803	Compromised	0.237074	Compromised	0.732552	0.279859	1.7	1.82	3.94	1.71	A_33_P3320283	Unknown
A_33_P3320408	0.125852	Compromised	-0.125853	Compromised	-2.35e-07	-0.327542	Compromised	-0.0211887	Compromised	-0.174366	0.47188	2.38	1.97	1.65	1.76	A_33_P3320408	Unknown
A_33_P3320415	0.0760016	Compromised	-0.0760021	Compromised	-2.38e-07	-0.514478	Compromised	-0.44772	Compromised	-0.481099	0.0285033	4.6	4.08	2.9	2.62	A_33_P3320415	Unknown
A_33_P3320418	-0.0772724	Compromised	0.0772719	Compromised	-2.375e-07	-0.0470257	Compromised	0.196276	Compromised	0.074625	0.656177	1.96	2.15	1.9	1.94	A_33_P3320418	Unknown
A_33_P3320698	-0.451341	Compromised	0.451341	Compromised	0	0.502861	Compromised	-0.896872	Compromised	-0.197006	0.835016	3.11	5.73	5.72	1.87	A_33_P3320698	Unknown
A_33_P3320708	-0.0407486	Compromised	0.0407491	Compromised	2.385e-07	-0.0862765	Compromised	0.208497	Compromised	0.0611103	0.728067	1.87	1.95	1.72	1.82	A_33_P3320708	Unknown
A_33_P3321120	-0.743092	Compromised	0.743092	Compromised	-2.3e-07	-0.765288	Compromised	0.505507	Compromised	-0.12989	0.906472	1.84	5.08	1.72	3.58	A_33_P3321120	Unknown
A_33_P3321382	0.214977	Compromised	-0.214978	Compromised	-2.4e-07	0.415906	Compromised	-0.744161	Compromised	-0.164127	0.815604	4.06	2.97	4.43	1.71	A_33_P3321382	Unknown
A_33_P3321564	-0.832184	Compromised	0.832184	Compromised	-2.3e-07	-1.07901	Compromised	-0.790479	Compromised	-0.934745	0.383706	2.1	6.56	1.68	1.77	A_33_P3321564	Unknown
A_33_P3321682	0.119291	Detected	-0.119292	Detected	-2.37e-07	0.133729	Detected	0.338095	Detected	0.235912	0.271952	17000	14200	16300	16200	A_33_P3321682	Unknown
A_33_P3321689	0.11942	Detected	-0.11942	Detected	0	-0.466919	Detected	-0.108302	Detected	-0.287611	0.313548	55.2	46.1	34.9	38.6	A_33_P3321689	Unknown
A_33_P3321934	-0.0174007	Compromised	0.0174007	Compromised	0	-0.141864	Compromised	1.23247	Compromised	0.545303	0.510768	2.09	2.11	1.82	4.07	A_33_P3321934	Unknown
A_33_P3322103	-0.139767	Compromised	0.139767	Compromised	1.15e-07	-0.0166669	Compromised	-0.269716	Compromised	-0.143192	0.526856	7.39	8.84	7.64	5.53	A_33_P3322103	Unknown
A_33_P3322211	0.206644	Compromised	-0.206644	Compromised	0	-1.85774	Compromised	-1.48726	Compromised	-1.6725	0.0264454	7.27	5.38	1.65	1.84	A_33_P3322211	Unknown
A_33_P3322430	0.127804	Detected	-0.127804	Detected	0	0.036546	Detected	-0.409173	Detected	-0.186314	0.54369	808	667	720	456	A_33_P3322430	Unknown
A_33_P3322460	0.132424	Detected	-0.132424	Detected	0	-0.349345	Detected	-0.50807	Detected	-0.428707	0.108905	35.6	29.2	24.2	18.7	A_33_P3322460	Unknown
A_33_P3322504	0.017761	Detected	-0.017761	Detected	0	-0.392565	Detected	0.539779	Detected	0.0736072	0.889119	36.4	35	26	42.8	A_33_P3322504	Unknown
A_33_P3322730	0.182894	Detected	-0.182894	Detected	0	0.459043	Detected	-0.7891	Detected	-0.165029	0.823382	64.2	49.1	73.8	26.8	A_33_P3322730	Unknown
A_33_P3322884	-0.0519772	Compromised	0.0519772	Compromised	0	-0.0730915	Compromised	0.205004	Compromised	0.0659561	0.700267	1.86	1.97	1.74	1.82	A_33_P3322884	Unknown
A_33_P3323544	-0.0346355	Compromised	0.0346351	Compromised	-2.385e-07	-0.154182	Compromised	0.144638	Compromised	-0.00477195	0.978006	2.06	2.13	1.8	1.91	A_33_P3323544	Unknown
A_33_P3323641	-0.263065	Compromised	0.263066	Compromised	2.35e-07	-0.270426	Compromised	-0.019114	Compromised	-0.14477	0.668697	1.98	2.81	1.87	1.92	A_33_P3323641	Unknown
A_33_P3323687	-0.0549979	Compromised	0.0549974	Compromised	-2.38e-07	-0.0836077	Compromised	0.241663	Compromised	0.0790277	0.690492	1.73	1.84	1.61	1.74	A_33_P3323687	Unknown
A_33_P3323892	-0.0477219	Compromised	0.0477214	Compromised	-2.385e-07	-0.0672574	Compromised	0.209763	Compromised	0.0712526	0.674783	1.89	1.99	1.77	1.85	A_33_P3323892	Unknown
A_33_P3323914	0.369836	Detected	-0.369836	Compromised	0	0.430724	Detected	-0.699547	Compromised	-0.134412	0.86065	10.2	6.02	10.1	3.98	A_33_P3323914	Unknown
A_33_P3323975	-0.0457253	Compromised	0.0457253	Compromised	0	-0.0961547	Compromised	0.226501	Compromised	0.0651729	0.734996	1.8	1.89	1.65	1.78	A_33_P3323975	Unknown
A_33_P3323989	-0.399334	Compromised	0.399335	Compromised	2.35e-07	2.17827	Detected	0.0265145	Compromised	1.10239	0.438113	2.1	3.6	11.9	2.31	A_33_P3323989	Unknown
A_33_P3324149	-0.26342	Detected	0.26342	Detected	0	-0.188318	Detected	0.332434	Detected	0.072058	0.863717	18.1	25.7	18.1	22.4	A_33_P3324149	Unknown
A_33_P3324284	-0.0479145	Compromised	0.0479145	Compromised	0	-0.0679703	Compromised	0.201542	Compromised	0.0667858	0.686456	1.88	1.98	1.76	1.83	A_33_P3324284	Unknown
A_33_P3324552	0.0326648	Detected	-0.0326648	Detected	0	0.359001	Detected	0.599212	Detected	0.479106	0.061347	75.7	71.3	90.1	91.8	A_33_P3324552	Unknown
A_33_P3324675	0.172533	Detected	-0.172533	Detected	0	0.539401	Detected	0.339863	Detected	0.439632	0.158156	17.4	13.5	21.3	16	A_33_P3324675	Unknown
A_33_P3324680	-0.269184	Compromised	0.269184	Compromised	0	-0.584264	Compromised	-0.275672	Compromised	-0.429968	0.300107	2.11	3.02	1.61	1.72	A_33_P3324680	Unknown
A_33_P3324781	0.232183	Detected	-0.232183	Detected	-1.2e-07	-0.443488	Detected	0.1986	Detected	-0.122444	0.786512	17.5	12.5	10.4	14	A_33_P3324781	Unknown
A_33_P3324899	0.492968	Detected	-0.492968	Compromised	1.2e-07	-1.00415	Compromised	0.70976	Detected	-0.147195	0.895299	12.4	6.17	4.17	11.8	A_33_P3324899	Unknown
A_33_P3324904	-0.023242	Detected	0.023242	Detected	0	-0.118066	Detected	-0.666035	Detected	-0.39205	0.290014	22.5	22.9	20	11.8	A_33_P3324904	Unknown
A_33_P3324974	-0.051527	Compromised	0.0515275	Compromised	2.385e-07	1.1332	Compromised	0.236818	Compromised	0.685009	0.268237	1.71	1.81	3.69	1.71	A_33_P3324974	Unknown
A_33_P3325250	0.181475	Compromised	-0.181474	Compromised	2.4e-07	-0.751286	Compromised	-0.506847	Compromised	-0.629066	0.102674	3.68	2.82	1.83	1.87	A_33_P3325250	Unknown
A_33_P3325330	0.251093	Compromised	-0.251092	Compromised	2.35e-07	-0.14019	Compromised	-0.104733	Compromised	-0.122462	0.6747	2.86	1.99	2.07	1.83	A_33_P3325330	Unknown
A_33_P3325826	-0.0597324	Compromised	0.0597324	Compromised	0	-0.0811391	Compromised	0.237074	Compromised	0.0779676	0.691431	1.7	1.82	1.59	1.71	A_33_P3325826	Unknown
A_33_P3325948	-0.0449781	Compromised	0.0449781	Compromised	0	-0.109735	Compromised	0.203621	Compromised	0.0469432	0.800459	1.84	1.93	1.67	1.79	A_33_P3325948	Unknown
A_33_P3326151	-0.120484	Detected	0.120484	Detected	0	-0.354333	Detected	-0.177431	Detected	-0.265882	0.217226	24.9	29	20.1	19.6	A_33_P3326151	Unknown
A_33_P3326312	0.083879	Detected	-0.083879	Detected	0	-0.144298	Detected	-0.239807	Detected	-0.192052	0.184904	269	236	218	176	A_33_P3326312	Unknown
A_33_P3326439	-0.0510669	Compromised	0.0510664	Compromised	-2.375e-07	-0.0886655	Compromised	0.228915	Compromised	0.0701249	0.715047	1.73	1.83	1.6	1.72	A_33_P3326439	Unknown
A_33_P3326802	-0.0202131	Compromised	0.0202131	Compromised	0	-1.46207	Compromised	-1.22511	Compromised	-1.34359	0.00790751	5.18	5.25	1.81	1.84	A_33_P3326802	Unknown
A_33_P3326817	-0.00297713	Detected	0.00297713	Detected	0	0.101871	Detected	0.135034	Detected	0.118453	0.0196331	1920	1900	1960	1730	A_33_P3326817	Unknown
A_33_P3326827	-0.227902	Compromised	0.227902	Compromised	0	-1.75201	Compromised	-1.18961	Compromised	-1.47081	0.0555621	5.09	6.88	1.68	2.14	A_33_P3326827	Unknown
A_33_P3326872	-0.224137	Compromised	0.224137	Detected	0	-0.136053	Detected	-2.12541	Compromised	-1.13073	0.382933	8.85	11.9	8.93	1.94	A_33_P3326872	Unknown
A_33_P3326898	-0.100472	Detected	0.100472	Detected	0	-0.688661	Detected	-0.0728171	Detected	-0.380739	0.360787	36.9	41.8	23.3	30.8	A_33_P3326898	Unknown
A_33_P3326942	0.176456	Compromised	-0.176457	Compromised	-2.4e-07	-0.34481	Compromised	-0.0400672	Compromised	-0.192438	0.495918	2.54	1.96	1.68	1.79	A_33_P3326942	Unknown
A_33_P3327140	0.0697019	Detected	-0.0697019	Detected	0	-0.144282	Detected	-0.115533	Detected	-0.129908	0.209495	1140	1020	933	821	A_33_P3327140	Unknown
A_33_P3327250	-0.0294952	Detected	0.0294952	Detected	0	0.0277581	Detected	-0.296848	Detected	-0.134545	0.500405	48.8	50.1	48.2	33.2	A_33_P3327250	Unknown
A_33_P3327491	-0.199268	Detected	0.199268	Detected	0	0.207616	Detected	0.282284	Detected	0.24495	0.350436	32.1	41.7	40.4	36.7	A_33_P3327491	Unknown
A_33_P3327723	0.935395	Compromised	-0.935395	Compromised	2.4e-07	-1.06032	Compromised	0.134657	Compromised	-0.462834	0.717181	6.68	1.8	1.59	3.14	A_33_P3327723	Unknown
A_33_P3327762	-0.083509	Detected	0.083509	Detected	0	-0.477471	Detected	-0.310521	Detected	-0.393996	0.0792791	26.3	29.1	19	18.4	A_33_P3327762	Unknown
A_33_P3327971	0.20331	Detected	-0.20331	Detected	0	-0.856074	Detected	-0.227792	Detected	-0.541933	0.28453	38.2	28.4	17.4	23.2	A_33_P3327971	Unknown
A_33_P3328274	-0.437256	Compromised	0.437256	Compromised	0	-0.446547	Compromised	-0.157132	Compromised	-0.30184	0.57955	1.76	3.18	1.66	1.75	A_33_P3328274	Unknown
A_33_P3328284	0.00317884	Detected	-0.00317884	Detected	0	0.282066	Detected	0.357112	Detected	0.319589	0.0136015	90.3	88.6	104	94.5	A_33_P3328284	Unknown
A_33_P3328289	-0.438211	Detected	0.438211	Detected	1.15e-07	-0.492096	Detected	-0.880517	Detected	-0.686306	0.288528	15.2	27.5	13.9	9.16	A_33_P3328289	Unknown
A_33_P3328543	-0.0507174	Compromised	0.0507174	Compromised	0	-0.0687256	Compromised	0.191824	Compromised	0.0615494	0.702753	1.92	2.03	1.8	1.86	A_33_P3328543	Unknown
A_33_P3328564	-0.0597324	Compromised	0.0597324	Compromised	0	-0.0811391	Compromised	0.237074	Compromised	0.0779676	0.691431	1.7	1.82	1.59	1.71	A_33_P3328564	Unknown
A_33_P3328569	-0.0668597	Compromised	0.0668597	Compromised	0	-0.0592213	Compromised	0.184396	Compromised	0.0625875	0.696522	1.97	2.13	1.88	1.92	A_33_P3328569	Unknown
A_33_P3328619	-0.10527	Detected	0.10527	Detected	-2.38e-07	0.188603	Detected	0.174614	Detected	0.181608	0.227324	17100	19500	19900	17000	A_33_P3328619	Unknown
A_33_P3328751	-0.372654	Compromised	0.372654	Compromised	0	-1.27511	Compromised	0.623418	Compromised	-0.325848	0.779617	3.19	5.27	1.62	5.21	A_33_P3328751	Unknown
A_33_P3328958	-0.0299754	Compromised	0.0299749	Compromised	-2.385e-07	-0.104252	Compromised	0.74267	Compromised	0.319209	0.530539	1.83	1.88	1.65	2.56	A_33_P3328958	Unknown
A_33_P3329038	0.718464	Compromised	-0.718464	Compromised	-2.5e-07	-0.850291	Compromised	-0.541122	Compromised	-0.695707	0.443734	5	1.82	1.6	1.71	A_33_P3329038	Unknown
A_33_P3329104	0.108775	Detected	-0.108775	Detected	-1.2e-07	0.157241	Detected	-0.37547	Detected	-0.109114	0.740981	16.4	13.9	16.1	9.6	A_33_P3329104	Unknown
A_33_P3329123	-0.326543	Compromised	0.326543	Compromised	0	-0.369439	Compromised	-0.0920644	Compromised	-0.230752	0.582158	1.91	2.96	1.76	1.84	A_33_P3329123	Unknown
A_33_P3329133	0.101656	Compromised	-0.101655	Compromised	2.4e-07	-1.34718	Compromised	-1.05908	Compromised	-1.20313	0.0208062	4.86	4.16	1.69	1.78	A_33_P3329133	Unknown
A_33_P3329740	-0.02091	Detected	0.02091	Detected	0	-0.246978	Detected	-0.718002	Detected	-0.48249	0.178081	1380	1400	1120	697	A_33_P3329740	Unknown
A_33_P3329991	0.180879	Detected	-0.180879	Detected	0	-0.334859	Detected	-0.290068	Detected	-0.312464	0.228593	738	566	490	436	A_33_P3329991	Unknown
A_33_P3330084	-0.158079	Compromised	0.158078	Compromised	-2.35e-07	-1.18715	Compromised	-1.24954	Compromised	-1.21835	0.0170443	4.45	5.46	2.07	1.71	A_33_P3330084	Unknown
A_33_P3330236	-0.386257	Detected	0.386257	Detected	0	0.264956	Detected	0.111185	Detected	0.188071	0.680077	21.8	36.7	32.5	25.2	A_33_P3330236	Unknown
A_33_P3330413	0.0371923	Detected	-0.0371928	Detected	-2.375e-07	-0.0492959	Detected	-0.212427	Detected	-0.130862	0.281775	4530	4240	4050	3120	A_33_P3330413	Unknown
A_33_P3330761	-0.0317483	Compromised	0.0317483	Compromised	0	-0.17307	Compromised	0.121245	Compromised	-0.0259125	0.87918	2.01	2.07	1.73	1.83	A_33_P3330761	Unknown
A_33_P3330877	-0.510531	Detected	0.510531	Detected	1.25e-07	-0.0712731	Detected	0.279474	Detected	0.104101	0.864888	10.1	20.2	13	14.3	A_33_P3330877	Unknown
A_33_P3330972	0.410699	Compromised	-0.410698	Compromised	2.5e-07	-0.530141	Compromised	-0.246508	Compromised	-0.388324	0.465771	3.64	2.03	1.8	1.89	A_33_P3330972	Unknown
A_33_P3331272	-0.0391431	Compromised	0.0391431	Compromised	0	-0.0857868	Compromised	0.223965	Compromised	0.0690892	0.707551	1.73	1.8	1.59	1.7	A_33_P3331272	Unknown
A_33_P3331326	0.000829458	Detected	-0.000829458	Detected	0	-0.053704	Detected	0.344457	Detected	0.145377	0.5412	1280	1260	1170	1330	A_33_P3331326	Unknown
A_33_P3331391	-0.635024	Compromised	0.635024	Compromised	0	0.257938	Compromised	-0.509909	Compromised	-0.125985	0.880805	2.15	5.11	3.79	1.92	A_33_P3331391	Unknown
A_33_P3331731	-0.0362301	Compromised	0.0362306	Compromised	2.385e-07	1.69671	Compromised	0.206552	Compromised	0.951632	0.330188	1.93	2	6.09	1.87	A_33_P3331731	Unknown
A_33_P3331776	0.0763979	Detected	-0.0763979	Detected	0	-0.135517	Detected	-0.137383	Detected	-0.13645	0.216033	64.3	57	52.7	45.4	A_33_P3331776	Unknown
A_33_P3331791	-0.0249102	Detected	0.0249102	Detected	0	-0.0192301	Detected	0.214192	Detected	0.0974808	0.499845	149	152	142	144	A_33_P3331791	Unknown
A_33_P3331911	-0.0495319	Compromised	0.0495319	Compromised	0	0.261637	Compromised	0.206392	Compromised	0.234015	0.0540183	1.8	1.9	2.12	1.76	A_33_P3331911	Unknown
A_33_P3331996	-0.0512953	Compromised	0.0512958	Compromised	2.385e-07	-0.0805306	Compromised	0.23705	Compromised	0.0782597	0.685234	1.72	1.82	1.6	1.72	A_33_P3331996	Unknown
A_33_P3332046	0.385051	Compromised	-0.385051	Compromised	0	-0.543108	Compromised	-0.578608	Compromised	-0.560858	0.282905	4.43	2.56	2.21	1.86	A_33_P3332046	Unknown
A_33_P3332541	-0.0493221	Compromised	0.0493226	Compromised	2.375e-07	-0.0990272	Compromised	0.222993	Compromised	0.0619831	0.74812	1.81	1.91	1.66	1.79	A_33_P3332541	Unknown
A_33_P3332749	7.7486e-05	Detected	-7.7486e-05	Detected	0	0.411775	Detected	-0.342004	Compromised	0.0348856	0.934689	13.7	13.5	17.3	8.85	A_33_P3332749	Unknown
A_33_P3332989	0.24627	Compromised	-0.24627	Compromised	2.4e-07	-0.499659	Compromised	0.159842	Compromised	-0.169909	0.719775	4.24	2.97	2.4	3.27	A_33_P3332989	Unknown
A_33_P3333003	0.363566	Detected	-0.363566	Detected	0	-1.02228	Compromised	-1.33872	Compromised	-1.1805	0.0967235	21.5	12.8	7.81	5.41	A_33_P3333003	Unknown
A_33_P3333058	-0.0636601	Detected	0.0636601	Detected	0	0.41726	Detected	-0.211954	Detected	0.102653	0.779431	15.7	16.9	20.8	11.6	A_33_P3333058	Unknown
A_33_P3333187	0.0653281	Detected	-0.0653281	Detected	0	-0.0996437	Detected	-0.0916829	Detected	-0.0956633	0.28133	56.1	50.5	47.5	41.2	A_33_P3333187	Unknown
A_33_P3333327	-0.0449262	Compromised	0.0449259	Compromised	-1.195e-07	0.753657	Detected	-0.0659819	Compromised	0.343838	0.492025	8.6	9.02	14.2	6.94	A_33_P3333327	Unknown
A_33_P3333485	0.299025	Compromised	-0.299025	Compromised	-2.4e-07	0.10263	Compromised	-0.876286	Compromised	-0.386828	0.569554	5.13	3.34	4.25	1.86	A_33_P3333485	Unknown
A_33_P3333523	0.0673666	Detected	-0.0673661	Detected	2.4e-07	-0.195165	Detected	-0.0555439	Detected	-0.125355	0.325477	2540	2280	2010	1910	A_33_P3333523	Unknown
A_33_P3333560	-0.158336	Detected	0.158336	Detected	0	0.0796626	Detected	0.223644	Detected	0.151653	0.475197	34.3	42.1	38.4	36.6	A_33_P3333560	Unknown
A_33_P3333677	-0.249155	Detected	0.249155	Detected	0	0.34725	Detected	0.228588	Detected	0.287919	0.377746	27.8	38.7	39.9	31.7	A_33_P3333677	Unknown
A_33_P3333708	-0.0312331	Detected	0.0312331	Detected	0	-0.0307271	Detected	0.123482	Detected	0.0463772	0.633265	893	919	848	814	A_33_P3333708	Unknown
A_33_P3333985	-0.0257633	Detected	0.0257633	Detected	0	-0.359846	Detected	-0.333419	Detected	-0.346632	0.00690509	328	335	247	217	A_33_P3333985	Unknown
A_33_P3334000	0.578954	Compromised	-0.578955	Compromised	-2.5e-07	-0.70594	Compromised	-0.439678	Compromised	-0.572809	0.436669	4.8	2.12	1.87	1.94	A_33_P3334000	Unknown
A_33_P3334043	-0.754998	Compromised	0.754999	Compromised	2.5e-07	-0.773006	Compromised	-0.474874	Compromised	-0.62394	0.502641	1.76	4.94	1.65	1.75	A_33_P3334043	Unknown
A_33_P3334121	-0.0391431	Compromised	0.0391431	Compromised	0	0.771255	Detected	-0.312597	Compromised	0.229329	0.714014	8.65	9	14.4	5.86	A_33_P3334121	Unknown
A_33_P3334342	0.0120678	Detected	-0.0120678	Detected	0	-0.00468636	Detected	0.0114765	Detected	0.00339508	0.83692	84.3	81.7	79.1	69	A_33_P3334342	Unknown
A_33_P3334428	0.170927	Compromised	-0.170927	Compromised	0	-0.458337	Compromised	-1.34688	Compromised	-0.902607	0.198397	5.98	4.65	3.67	1.71	A_33_P3334428	Unknown
A_33_P3334718	0.49931	Compromised	-0.49931	Compromised	0	0.0242147	Compromised	-0.313556	Compromised	-0.144671	0.809478	3.69	1.82	2.52	1.72	A_33_P3334718	Unknown
A_33_P3335401	0.299883	Compromised	-0.299883	Compromised	0	-1.33083	Compromised	-1.18204	Compromised	-1.25643	0.0554878	6.72	4.37	2.06	1.97	A_33_P3335401	Unknown
A_33_P3335540	-0.044796	Compromised	0.0447965	Compromised	2.385e-07	-0.108759	Compromised	0.20402	Compromised	0.0476308	0.797266	1.85	1.94	1.68	1.8	A_33_P3335540	Unknown
A_33_P3335576	-0.058357	Detected	0.0583568	Detected	-1.19e-07	0.493001	Detected	0.127541	Detected	0.310271	0.247171	9.92	10.6	13.8	9.24	A_33_P3335576	Unknown
A_33_P3335606	-0.0340202	Detected	0.0340202	Detected	0	-0.0285847	Detected	0.10184	Detected	0.0366278	0.667866	997	1030	950	897	A_33_P3335606	Unknown
A_33_P3335645	-0.060833	Compromised	0.0608325	Compromised	-2.385e-07	-0.0681934	Compromised	0.219475	Compromised	0.0756409	0.675987	1.8	1.93	1.7	1.79	A_33_P3335645	Unknown
A_33_P3335905	-0.0105309	Compromised	0.0105305	Compromised	-2.385e-07	-0.182442	Compromised	1.33524	Compromised	0.5764	0.526864	1.97	1.97	1.66	4.1	A_33_P3335905	Unknown
A_33_P3336018	-0.0564022	Compromised	0.0564017	Compromised	-2.38e-07	-0.0637627	Compromised	0.652435	Compromised	0.294336	0.5021	1.98	2.11	1.87	2.65	A_33_P3336018	Unknown
A_33_P3336038	0.120102	Detected	-0.120101	Detected	2.4e-07	-0.234662	Detected	-0.172096	Detected	-0.203379	0.242939	16300	13600	12100	10900	A_33_P3336038	Unknown
A_33_P3336148	0.0337982	Detected	-0.0337982	Detected	0	-1.22743	Compromised	-1.52738	Compromised	-1.37741	0.0122294	15.1	14.2	5.98	4.19	A_33_P3336148	Unknown
A_33_P3336302	-0.0506158	Compromised	0.0506158	Compromised	0	-0.0691733	Compromised	0.229462	Compromised	0.0801444	0.661746	1.75	1.85	1.64	1.74	A_33_P3336302	Unknown
A_33_P3336567	-0.321847	Compromised	0.321847	Compromised	2.4e-07	-1.69153	Compromised	0.282526	Compromised	-0.704502	0.567386	4.41	6.79	1.62	5.49	A_33_P3336567	Unknown
A_33_P3337119	-0.0253282	Compromised	0.0253282	Compromised	0	-0.141804	Compromised	0.154376	Compromised	0.0062859	0.970428	1.93	1.97	1.69	1.79	A_33_P3337119	Unknown
A_33_P3337742	-0.00368619	Detected	0.00368619	Detected	0	-0.331062	Detected	0.224377	Detected	-0.0533423	0.865431	95.3	94.4	72.1	91.4	A_33_P3337742	Unknown
A_33_P3338071	-0.416951	Compromised	0.416951	Compromised	2.4e-07	0.0067606	Compromised	-0.889818	Compromised	-0.441529	0.545701	3	5.27	3.82	1.77	A_33_P3338071	Unknown
A_33_P3338292	-0.625591	Compromised	0.625591	Compromised	-1.2e-07	-0.565025	Compromised	-1.51806	Compromised	-1.04154	0.316441	3.99	9.36	3.95	1.76	A_33_P3338292	Unknown
A_33_P3338379	-0.518084	Compromised	0.518084	Compromised	0	0.479015	Compromised	-0.299749	Compromised	0.089633	0.90267	1.9	3.84	3.6	1.81	A_33_P3338379	Unknown
A_33_P3338403	-0.0779295	Compromised	0.077929	Compromised	-2.4e-07	-0.0558462	Compromised	0.187932	Compromised	0.0660429	0.692811	1.94	2.13	1.87	1.91	A_33_P3338403	Unknown
A_33_P3338539	-0.0526371	Compromised	0.0526371	Compromised	0	-0.0669708	Compromised	0.219854	Compromised	0.0764415	0.666442	1.83	1.94	1.72	1.81	A_33_P3338539	Unknown
A_33_P3338788	-0.0463076	Compromised	0.0463071	Compromised	-2.385e-07	-0.0812597	Compromised	0.217376	Compromised	0.068058	0.705792	1.77	1.86	1.64	1.74	A_33_P3338788	Unknown
A_33_P3338808	-0.0568552	Compromised	0.0568552	Compromised	0	-0.0573049	Compromised	0.186636	Compromised	0.0646656	0.678278	1.96	2.09	1.86	1.9	A_33_P3338808	Unknown
A_33_P3338833	-0.0346355	Compromised	0.0346351	Compromised	-2.385e-07	-0.154182	Compromised	0.144638	Compromised	-0.00477195	0.978006	2.06	2.13	1.8	1.91	A_33_P3338833	Unknown
A_33_P3338873	-0.631102	Compromised	0.631102	Compromised	1.25e-07	-1.8267	Compromised	-1.09136	Compromised	-1.45903	0.183831	4.15	9.81	1.72	2.47	A_33_P3338873	Unknown
A_33_P3338937	-0.111188	Compromised	0.111188	Compromised	0	-1.28745	Compromised	-1.27999	Compromised	-1.28372	0.00742691	7.88	9.06	3.31	2.87	A_33_P3338937	Unknown
A_33_P3339197	0.337466	Compromised	-0.337466	Compromised	0	-0.119927	Compromised	0.378719	Compromised	0.129396	0.786939	3.24	2	2.24	2.73	A_33_P3339197	Unknown
A_33_P3339388	-0.0429158	Compromised	0.0429158	Compromised	0	-0.0906715	Compromised	0.200575	Compromised	0.0549519	0.752045	1.96	2.05	1.8	1.9	A_33_P3339388	Unknown
A_33_P3339446	0.556531	Compromised	-0.556531	Compromised	0	-1.27707	Compromised	0.256285	Compromised	-0.510393	0.644007	5.97	2.72	1.59	3.97	A_33_P3339446	Unknown
A_33_P3339611	-0.0292683	Compromised	0.0292678	Compromised	-2.385e-07	-0.0728116	Compromised	0.212783	Compromised	0.0699859	0.678521	1.9	1.95	1.75	1.84	A_33_P3339611	Unknown
A_33_P3339696	0.230119	Compromised	-0.230119	Compromised	0	1.47285	Compromised	1.11304	Compromised	1.29294	0.0474356	3.49	2.5	7.84	5.27	A_33_P3339696	Unknown
A_33_P3339701	-0.720387	Compromised	0.720388	Compromised	2.4e-07	-1.70262	Compromised	-1.45851	Compromised	-1.58057	0.162995	3.85	10.3	1.85	1.89	A_33_P3339701	Unknown
A_33_P3339741	-0.662793	Compromised	0.662794	Detected	2.4e-07	-0.172654	Compromised	-0.570557	Compromised	-0.371605	0.645017	4.17	10.3	5.56	3.64	A_33_P3339741	Unknown
A_33_P3340065	0.657523	Compromised	-0.657523	Compromised	0	-0.50039	Compromised	0.875391	Compromised	0.187501	0.862006	8.18	3.24	3.48	7.79	A_33_P3340065	Unknown
A_33_P3340114	-0.0510669	Compromised	0.0510664	Compromised	-2.375e-07	-0.0886655	Compromised	0.228915	Compromised	0.0701249	0.715047	1.73	1.83	1.6	1.72	A_33_P3340114	Unknown
A_33_P3340189	0.33715	Compromised	-0.33715	Compromised	0	-0.487309	Compromised	-0.208102	Compromised	-0.347705	0.441229	3.19	1.97	1.71	1.79	A_33_P3340189	Unknown
A_33_P3340229	-0.145096	Compromised	0.145096	Compromised	0	-1.70017	Compromised	-0.63623	Compromised	-1.1682	0.168279	5.51	6.64	1.78	3.21	A_33_P3340229	Unknown
A_33_P3340264	0.23039	Detected	-0.23039	Compromised	-1.2e-07	0.359939	Detected	-0.582667	Compromised	-0.111364	0.851556	8.84	6.33	9.18	4.12	A_33_P3340264	Unknown
A_33_P3340424	0.0167377	Detected	-0.0167377	Detected	0	-0.0915277	Detected	0.145303	Detected	0.0268879	0.842994	620	597	546	555	A_33_P3340424	Unknown
A_33_P3340454	-0.0537848	Compromised	0.0537853	Compromised	2.385e-07	-0.0707126	Compromised	0.226433	Compromised	0.0778601	0.670969	1.78	1.89	1.67	1.77	A_33_P3340454	Unknown
A_33_P3340828	0.406345	Detected	-0.406345	Compromised	0	-1.846	Compromised	-0.261917	Compromised	-1.05396	0.358072	13.1	7.35	2.61	6.75	A_33_P3340828	Unknown
A_33_P3340956	-0.0627961	Compromised	0.0627961	Compromised	0	0.537679	Compromised	0.233865	Compromised	0.385772	0.143486	1.73	1.86	2.49	1.74	A_33_P3340956	Unknown
A_33_P3341289	0.506604	Compromised	-0.506605	Compromised	-2.5e-07	-0.693573	Compromised	0.104634	Compromised	-0.294469	0.692757	4.26	2.08	1.76	2.64	A_33_P3341289	Unknown
A_33_P3341568	-0.0542622	Detected	0.0542622	Detected	0	-0.197801	Detected	-0.0516715	Detected	-0.124736	0.304059	128	136	110	105	A_33_P3341568	Unknown
A_33_P3341731	-0.0248151	Detected	0.0248151	Detected	0	-0.0805006	Detected	0.163994	Detected	0.0417469	0.769714	150	153	137	140	A_33_P3341731	Unknown
A_33_P3341882	0.145236	Compromised	-0.145236	Compromised	2.4e-07	-0.297647	Compromised	0.602181	Compromised	0.152267	0.777947	2.42	1.95	1.69	2.72	A_33_P3341882	Unknown
A_33_P3342146	-0.0314407	Compromised	0.0314407	Compromised	0	-0.0363078	Compromised	0.176936	Compromised	0.0703142	0.591704	2.04	2.1	1.93	1.93	A_33_P3342146	Unknown
A_33_P3342195	-0.686101	Compromised	0.686101	Compromised	0	0.480316	Compromised	0.753838	Compromised	0.617077	0.470795	1.76	4.49	3.75	3.91	A_33_P3342195	Unknown
A_33_P3342420	-0.0499587	Compromised	0.0499582	Compromised	-2.38e-07	-0.0930386	Compromised	0.222085	Compromised	0.0645232	0.733924	1.78	1.88	1.64	1.76	A_33_P3342420	Unknown
A_33_P3342953	-0.358975	Compromised	0.358975	Compromised	0	-0.206912	Compromised	0.383402	Compromised	0.0882452	0.866927	2.19	3.55	2.31	3	A_33_P3342953	Unknown
A_33_P3343200	-0.0359712	Compromised	0.0359712	Compromised	0	-0.100595	Compromised	0.191938	Compromised	0.0456717	0.790359	1.95	2.02	1.77	1.87	A_33_P3343200	Unknown
A_33_P3343305	0.0365527	Detected	-0.0365527	Detected	0	0.258496	Detected	0.272431	Detected	0.265463	0.0190878	36.4	34.1	40.3	35.1	A_33_P3343305	Unknown
A_33_P3343340	-0.0178914	Compromised	0.0178914	Compromised	0	-0.123856	Compromised	2.71297	Detected	1.29456	0.457784	1.95	1.97	1.72	10.6	A_33_P3343340	Unknown
A_33_P3343394	-0.0634646	Compromised	0.0634651	Compromised	2.4e-07	0.37827	Compromised	0.187791	Compromised	0.283031	0.131918	1.97	2.12	2.54	1.92	A_33_P3343394	Unknown
A_33_P3343605	0.014235	Compromised	-0.014235	Compromised	0	0.408376	Detected	-0.422412	Compromised	-0.00701809	0.988061	8	7.73	9.98	4.84	A_33_P3343605	Unknown
A_33_P3344044	-0.051527	Compromised	0.0515275	Compromised	2.385e-07	-0.0813951	Compromised	0.236818	Compromised	0.0777116	0.687851	1.71	1.81	1.59	1.71	A_33_P3344044	Unknown
A_33_P3344297	0.0327234	Compromised	-0.0327234	Compromised	0	-1.52368	Compromised	0.168218	Compromised	-0.677731	0.507377	5.67	5.34	1.83	5.1	A_33_P3344297	Unknown
A_33_P3344521	-0.0374641	Compromised	0.0374641	Compromised	0	-0.110886	Compromised	0.17853	Compromised	0.0338223	0.842014	1.84	1.91	1.66	1.75	A_33_P3344521	Unknown
A_33_P3345031	0.0807962	Detected	-0.0807962	Detected	0	0.0339069	Detected	-0.231503	Detected	-0.098798	0.589899	185	163	170	122	A_33_P3345031	Unknown
A_33_P3345108	-0.257102	Compromised	0.257102	Compromised	0	1.01643	Compromised	1.0428	Compromised	1.02962	0.0572051	3.73	5.25	8.56	7.52	A_33_P3345108	Unknown
A_33_P3345299	-0.0499587	Compromised	0.0499582	Compromised	-2.38e-07	-0.0668864	Compromised	0.230259	Compromised	0.0816863	0.654231	1.78	1.88	1.67	1.77	A_33_P3345299	Unknown
A_33_P3345304	-0.0497246	Compromised	0.0497246	Compromised	0	-0.073113	Compromised	0.201531	Compromised	0.0642092	0.703138	1.97	2.08	1.84	1.92	A_33_P3345304	Unknown
A_33_P3345319	-0.0277476	Compromised	0.0277472	Compromised	-2.385e-07	-0.162317	Compromised	0.136967	Compromised	-0.0126753	0.941212	2.07	2.12	1.79	1.9	A_33_P3345319	Unknown
A_33_P3345409	-0.0348673	Compromised	0.0348678	Compromised	2.385e-07	-0.156458	Compromised	0.143295	Compromised	-0.00658131	0.96977	2.04	2.11	1.78	1.89	A_33_P3345409	Unknown
A_33_P3345614	0.0602052	Detected	-0.0602052	Detected	0	0.0112164	Detected	0.162684	Detected	0.0869503	0.463647	182	165	167	160	A_33_P3345614	Unknown
A_33_P3345638	-0.194078	Compromised	0.194078	Compromised	0	0.0784397	Compromised	-1.46543	Compromised	-0.693494	0.475472	5.66	7.3	6.49	1.92	A_33_P3345638	Unknown
A_33_P3345808	-0.051527	Compromised	0.0515275	Compromised	2.385e-07	0.144881	Compromised	0.890428	Compromised	0.517654	0.302753	1.71	1.81	1.86	2.69	A_33_P3345808	Unknown
A_33_P3345821	-0.0466056	Compromised	0.0466056	Compromised	0	-0.0710401	Compromised	0.204265	Compromised	0.0666125	0.691681	1.95	2.05	1.82	1.9	A_33_P3345821	Unknown
A_33_P3346046	-0.021297	Detected	0.021297	Detected	0	0.203093	Detected	-0.132406	Detected	0.0353434	0.853793	79.8	81	88.5	60.5	A_33_P3346046	Unknown
A_33_P3346062	-0.055758	Compromised	0.055758	Compromised	0	-0.0771647	Compromised	0.241049	Compromised	0.0819421	0.674982	1.7	1.81	1.59	1.71	A_33_P3346062	Unknown
A_33_P3346331	0.886769	Compromised	-0.88677	Compromised	-2.5e-07	0.16727	Compromised	1.2833	Compromised	0.725283	0.560355	7.32	2.11	4.22	7.89	A_33_P3346331	Unknown
A_33_P3346333	-0.00356126	Detected	0.00356126	Detected	0	-0.876686	Compromised	-0.345267	Compromised	-0.610976	0.148229	10.4	10.3	5.39	6.72	A_33_P3346333	Unknown
A_33_P3346508	-0.0179579	Detected	0.0179579	Detected	0	0.287778	Detected	0.193732	Detected	0.240755	0.0410393	77.3	78.1	90.7	73.3	A_33_P3346508	Unknown
A_33_P3346526	0.05971	Compromised	-0.05971	Compromised	0	-0.135465	Compromised	-1.48178	Compromised	-0.808624	0.35409	6.79	6.16	5.63	1.91	A_33_P3346526	Unknown
A_33_P3346533	0.0118387	Detected	-0.0118387	Detected	0	-0.139128	Detected	-0.00531888	Detected	-0.0722237	0.399159	1310	1270	1120	1060	A_33_P3346533	Unknown
A_33_P3346610	0.222768	Detected	-0.222768	Detected	0	0.375786	Detected	-0.490522	Detected	-0.057368	0.917005	88.3	63.9	93.2	44.1	A_33_P3346610	Unknown
A_33_P3346643	-0.0325022	Compromised	0.0325027	Compromised	2.38e-07	-0.122685	Compromised	0.202825	Compromised	0.0400696	0.83172	1.94	2	1.73	1.87	A_33_P3346643	Unknown
A_33_P3346691	-0.0501752	Compromised	0.0501752	Compromised	0	-0.0763574	Compromised	0.221776	Compromised	0.0727091	0.689298	1.77	1.87	1.65	1.75	A_33_P3346691	Unknown
A_33_P3346716	-0.724284	Compromised	0.724284	Compromised	0	-0.332608	Compromised	0.171117	Compromised	-0.0807455	0.925748	2.16	5.81	2.69	3.29	A_33_P3346716	Unknown
A_33_P3346881	-0.253521	Compromised	0.253521	Compromised	0	0.219059	Compromised	-0.0531235	Compromised	0.082968	0.80022	3.72	5.21	4.9	3.5	A_33_P3346881	Unknown
A_33_P3347020	-0.0473423	Compromised	0.0473418	Compromised	-2.38e-07	-0.0739365	Compromised	0.194956	Compromised	0.0605097	0.712494	1.91	2.01	1.78	1.85	A_33_P3347020	Unknown
A_33_P3347049	-0.0185013	Detected	0.0185013	Detected	0	-0.0174007	Detected	-0.113485	Detected	-0.0654428	0.3315	18	18.2	17.1	13.8	A_33_P3347049	Unknown
A_33_P3347457	0.637839	Compromised	-0.637839	Compromised	0	-0.760677	Compromised	-0.478538	Compromised	-0.619607	0.44299	5.11	2.08	1.84	1.93	A_33_P3347457	Unknown
A_33_P3347503	-0.0706778	Detected	0.070678	Detected	1.18e-07	1.21963	Detected	-0.329531	Compromised	0.44505	0.624936	11.5	12.5	26.7	7.87	A_33_P3347503	Unknown
A_33_P3347522	0.110927	Detected	-0.110927	Detected	0	0.0429239	Detected	0.3129	Detected	0.177912	0.415678	41300	34900	37400	38900	A_33_P3347522	Unknown
A_33_P3347787	0.232799	Detected	-0.2328	Compromised	-1.2e-07	-0.699517	Compromised	-0.390378	Compromised	-0.544947	0.190462	11.7	8.35	5.82	6.22	A_33_P3347787	Unknown
A_33_P3348046	0.904143	Compromised	-0.904143	Compromised	2.35e-07	-1.03171	Compromised	-0.0832605	Compromised	-0.557485	0.639808	6.61	1.86	1.64	2.73	A_33_P3348046	Unknown
A_33_P3348079	-0.0257173	Compromised	0.0257177	Compromised	2.385e-07	0.669721	Compromised	0.175645	Compromised	0.422683	0.2309	1.88	1.92	2.89	1.77	A_33_P3348079	Unknown
A_33_P3348151	0.100177	Detected	-0.100177	Detected	0	-0.445308	Detected	-0.553992	Detected	-0.49965	0.0482894	24.6	21.1	16	12.8	A_33_P3348151	Unknown
A_33_P3348194	0.0104809	Compromised	-0.0104809	Compromised	0	-0.178833	Compromised	0.130626	Compromised	-0.0241036	0.890757	2.09	2.03	1.74	1.86	A_33_P3348194	Unknown
A_33_P3348328	-0.0209098	Compromised	0.0209103	Compromised	2.385e-07	0.89598	Compromised	0.143805	Compromised	0.519892	0.301542	2.07	2.1	3.71	1.9	A_33_P3348328	Unknown
A_33_P3348509	0.141004	Detected	-0.141004	Detected	0	0.0154831	Detected	0.181422	Detected	0.0984523	0.608455	28.5	23.1	24.8	24	A_33_P3348509	Unknown
A_33_P3348670	0.0979485	Compromised	-0.0979485	Compromised	0	0.515519	Compromised	0.820261	Compromised	0.66789	0.0663207	2.65	2.28	3.36	3.58	A_33_P3348670	Unknown
A_33_P3348744	0.02073	Detected	-0.0207295	Detected	2.385e-07	0.0265689	Detected	0.082921	Detected	0.054745	0.25805	4480	4290	4270	3830	A_33_P3348744	Unknown
A_33_P3348927	-0.0516148	Detected	0.0516148	Detected	0	-0.514682	Detected	-0.696156	Detected	-0.605419	0.0284673	27.3	28.9	18.8	14.3	A_33_P3348927	Unknown
A_33_P3349002	-0.102081	Compromised	0.102081	Compromised	0	0.535753	Compromised	-0.813735	Compromised	-0.138991	0.857452	4.36	4.95	6.44	2.18	A_33_P3349002	Unknown
A_33_P3349025	-0.226506	Compromised	0.226506	Compromised	0	-0.242701	Compromised	-0.158287	Compromised	-0.200494	0.475949	2.12	2.86	1.99	1.82	A_33_P3349025	Unknown
A_33_P3349158	-0.173563	Compromised	0.173563	Compromised	2.35e-07	-0.457092	Compromised	-0.157948	Compromised	-0.30752	0.311607	2.09	2.62	1.63	1.73	A_33_P3349158	Unknown
A_33_P3349474	0.0148468	Detected	-0.0148463	Detected	2.385e-07	0.0593457	Detected	-0.16137	Detected	-0.0510123	0.691827	8100	7819.99	7929.99	5870	A_33_P3349474	Unknown
A_33_P3349501	0.142282	Detected	-0.142282	Detected	0	-0.024817	Detected	-0.15106	Detected	-0.0879384	0.629023	22	17.8	18.6	14.7	A_33_P3349501	Unknown
A_33_P3349597	0.0522349	Detected	-0.0522349	Detected	0	0.191466	Detected	-0.712859	Detected	-0.260696	0.624624	660	605	690	318	A_33_P3349597	Unknown
A_33_P3349676	0.203891	Compromised	-0.203891	Compromised	2.4e-07	0.993107	Compromised	0.0587616	Compromised	0.525934	0.410605	4.2	3.12	6.89	3.11	A_33_P3349676	Unknown
A_33_P3349727	-0.0521946	Compromised	0.0521951	Compromised	2.385e-07	-0.0738468	Compromised	0.204615	Compromised	0.0653839	0.70309	1.85	1.96	1.73	1.81	A_33_P3349727	Unknown
A_33_P3350196	0.70406	Detected	-0.70406	Compromised	0	-0.143762	Detected	0.492835	Detected	0.174536	0.842272	16.4	6.09	8.65	11.6	A_33_P3350196	Unknown
A_33_P3350247	-0.0260444	Compromised	0.0260439	Compromised	-2.385e-07	-0.0994658	Compromised	0.18995	Compromised	0.0452421	0.787396	1.84	1.88	1.66	1.75	A_33_P3350247	Unknown
A_33_P3350453	0.513264	Compromised	-0.513264	Compromised	2.5e-07	-0.490346	Compromised	-1.09574	Compromised	-0.793042	0.314672	6.78	3.28	3.21	1.82	A_33_P3350453	Unknown
A_33_P3350549	0.146152	Detected	-0.146152	Detected	0	0.0399487	Detected	-0.416801	Detected	-0.188426	0.558971	105	84.5	92.6	58.2	A_33_P3350549	Unknown
A_33_P3350684	-0.249134	Compromised	0.249134	Compromised	-2.35e-07	-0.284736	Compromised	0.0309906	Compromised	-0.126873	0.708991	1.76	2.45	1.63	1.75	A_33_P3350684	Unknown
A_33_P3350744	-0.186187	Compromised	0.186187	Detected	-1.2e-07	-1.00523	Compromised	0.199714	Detected	-0.402759	0.588398	9.72	12.4	5.23	10.4	A_33_P3350744	Unknown
A_33_P3351062	-0.173524	Detected	0.173524	Detected	0	-0.248169	Detected	0.408018	Detected	0.0799241	0.849467	14.2	17.8	12.8	17.4	A_33_P3351062	Unknown
A_33_P3351166	0.146906	Detected	-0.146906	Detected	0	-1.34329	Compromised	0.0358448	Detected	-0.653722	0.451702	15.3	12.3	5.17	11.6	A_33_P3351166	Unknown
A_33_P3351276	0.038727	Detected	-0.038727	Detected	0	-0.192707	Detected	-0.0152347	Detected	-0.103971	0.39525	30.3	28.3	24.5	23.9	A_33_P3351276	Unknown
A_33_P3351388	0.0647805	Detected	-0.0647805	Detected	0	-0.099714	Detected	-0.147303	Detected	-0.123509	0.215399	46.4	41.8	39.3	32.8	A_33_P3351388	Unknown
A_33_P3351524	0.132495	Detected	-0.132495	Detected	0	-0.00445414	Detected	-0.125212	Detected	-0.0648329	0.699681	139	114	120	95.2	A_33_P3351524	Unknown
A_33_P3351529	0.0791159	Detected	-0.0791159	Detected	0	-0.114806	Detected	-0.12053	Detected	-0.117668	0.275539	67600.1	59700	56100	48200	A_33_P3351529	Unknown
A_33_P3351790	-0.536261	Compromised	0.536261	Compromised	0	-0.569936	Compromised	-0.264125	Compromised	-0.417031	0.532524	1.79	3.71	1.66	1.77	A_33_P3351790	Unknown
A_33_P3351791	-0.30388	Compromised	0.303879	Compromised	-2.4e-07	0.49037	Compromised	-0.645461	Compromised	-0.0775454	0.915177	2.77	4.16	4.56	1.79	A_33_P3351791	Unknown
A_33_P3351920	0.158746	Detected	-0.158746	Detected	0	0.38224	Detected	0.308385	Detected	0.345312	0.168269	12	9.49	13.3	10.9	A_33_P3351920	Unknown
A_33_P3352011	0.171343	Detected	-0.171344	Detected	-1.15e-07	-0.182399	Detected	0.10651	Detected	-0.0379444	0.881128	17.5	13.6	13	13.7	A_33_P3352011	Unknown
A_33_P3352268	-0.0353219	Detected	0.0353219	Detected	0	0.222724	Detected	-0.425721	Detected	-0.101499	0.785083	42.9	44.4	48.7	26.8	A_33_P3352268	Unknown
A_33_P3352572	-0.0469704	Compromised	0.0469699	Compromised	-2.385e-07	-0.072473	Compromised	0.203507	Compromised	0.0655169	0.697106	1.93	2.03	1.8	1.88	A_33_P3352572	Unknown
A_33_P3352837	0.252801	Compromised	-0.252801	Compromised	0	0.292774	Compromised	-0.0512719	Compromised	0.120751	0.731054	2.91	2.02	2.84	1.93	A_33_P3352837	Unknown
A_33_P3353275	-0.223663	Compromised	0.223663	Compromised	0	-0.69735	Compromised	-0.663855	Compromised	-0.680603	0.0936016	5.12	6.88	3.5	3.09	A_33_P3353275	Unknown
A_33_P3353431	0.243663	Compromised	-0.243663	Compromised	0	1.41323	Compromised	-0.0638423	Compromised	0.674693	0.477096	2.66	1.87	5.68	1.76	A_33_P3353431	Unknown
A_33_P3353630	-0.06513	Detected	0.0651302	Detected	1.195e-07	-0.108175	Detected	-0.857537	Compromised	-0.482856	0.331943	9.92	10.7	9.14	4.69	A_33_P3353630	Unknown
A_33_P3353752	-0.313983	Compromised	0.313983	Compromised	2.4e-07	-0.350908	Compromised	-0.0507288	Compromised	-0.200819	0.622207	1.74	2.65	1.61	1.71	A_33_P3353752	Unknown
A_33_P3353873	0.252977	Detected	-0.252977	Detected	-1.15e-07	0.351537	Detected	-1.68898	Compromised	-0.668719	0.589753	18.3	12.7	18.6	3.9	A_33_P3353873	Unknown
A_33_P3353906	0.0190885	Detected	-0.0190885	Detected	0	-0.0238225	Detected	0.198392	Detected	0.0872846	0.519783	522	501	481	484	A_33_P3353906	Unknown
A_33_P3354553	0.145764	Detected	-0.145764	Detected	0	-0.59746	Detected	-0.971383	Detected	-0.784422	0.0804674	23.1	18.6	13.1	8.72	A_33_P3354553	Unknown
A_33_P3354579	-0.0453482	Compromised	0.0453477	Compromised	-2.385e-07	-0.094337	Compromised	0.227056	Compromised	0.0663593	0.729456	1.82	1.91	1.67	1.8	A_33_P3354579	Unknown
A_33_P3354731	-0.0349855	Compromised	0.0349855	Compromised	0	-0.133367	Compromised	0.172986	Compromised	0.0198097	0.911201	2.03	2.1	1.8	1.92	A_33_P3354731	Unknown
A_33_P3354783	0.559115	Detected	-0.559115	Compromised	0	0.17159	Detected	-1.22856	Compromised	-0.528484	0.615047	11.3	5.13	8.2	2.68	A_33_P3354783	Unknown
A_33_P3354970	-0.305041	Compromised	0.305041	Compromised	0	0.651532	Compromised	0.276501	Compromised	0.464016	0.324409	3.55	5.34	6.54	4.35	A_33_P3354970	Unknown
A_33_P3356106	-0.0707979	Compromised	0.0707974	Compromised	-2.4e-07	0.312196	Detected	-0.117913	Compromised	0.0971415	0.709679	7.23	7.86	8.95	5.73	A_33_P3356106	Unknown
A_33_P3356182	-0.205419	Detected	0.205419	Detected	0	-1.89941	Compromised	-1.00878	Compromised	-1.4541	0.0974086	8.93	11.7	2.62	4.19	A_33_P3356182	Unknown
A_33_P3356366	-0.0900426	Compromised	0.0900421	Compromised	-2.38e-07	-1.13303	Compromised	-0.837321	Compromised	-0.985174	0.0295166	3.69	4.12	1.7	1.8	A_33_P3356366	Unknown
A_33_P3356537	-0.0485048	Compromised	0.0485053	Compromised	2.38e-07	-0.121081	Compromised	0.496361	Compromised	0.18764	0.609195	1.85	1.95	1.67	2.21	A_33_P3356537	Unknown
A_33_P3356637	0.301293	Detected	-0.301293	Compromised	-1.2e-07	-1.30355	Compromised	-1.8306	Compromised	-1.56708	0.059483	9.26	6.01	2.89	1.73	A_33_P3356637	Unknown
A_33_P3356696	-0.055866	Detected	0.055866	Detected	0	-0.0692027	Detected	-0.81993	Compromised	-0.444566	0.362085	18.5	19.7	17.4	8.92	A_33_P3356696	Unknown
A_33_P3357000	-0.0253282	Compromised	0.0253282	Compromised	0	-0.116419	Compromised	1.58345	Compromised	0.733515	0.479253	1.93	1.97	1.72	4.82	A_33_P3357000	Unknown
A_33_P3357232	1.07184	Compromised	-1.07184	Compromised	-2.5e-07	-1.19941	Compromised	-0.900773	Compromised	-1.05009	0.434238	8.34	1.86	1.64	1.74	A_33_P3357232	Unknown
A_33_P3357879	0.0496166	Detected	-0.0496163	Detected	1.19e-07	0.214216	Detected	-0.318574	Compromised	-0.0521789	0.865085	12.5	11.5	13.3	7.93	A_33_P3357879	Unknown
A_33_P3358109	-0.39851	Compromised	0.398511	Compromised	2.35e-07	-1.47761	Compromised	-1.14618	Compromised	-1.3119	0.093326	3.65	6.25	1.64	1.78	A_33_P3358109	Unknown
A_33_P3358347	-0.0555656	Detected	0.0555656	Detected	0	0.133224	Detected	0.172389	Detected	0.152807	0.122031	683	727	739	655	A_33_P3358347	Unknown
A_33_P3358582	-0.915328	Compromised	0.915327	Compromised	-2.25e-07	-0.193863	Compromised	-0.674811	Compromised	-0.434337	0.691326	1.84	6.45	2.88	1.78	A_33_P3358582	Unknown
A_33_P3358653	-0.104882	Compromised	0.104882	Compromised	0	-0.556101	Compromised	-0.272036	Compromised	-0.414069	0.143652	2.29	2.61	1.59	1.67	A_33_P3358653	Unknown
A_33_P3358804	0.0261724	Detected	-0.0261724	Detected	0	0.0669677	Detected	0.22517	Detected	0.146069	0.221673	38.3	36.4	37.4	36	A_33_P3358804	Unknown
A_33_P3358851	0.734297	Detected	-0.734297	Compromised	0	-0.870082	Compromised	0.844999	Detected	-0.0125414	0.992145	16.4	5.84	5.12	14.5	A_33_P3358851	Unknown
A_33_P3358855	-1.045	Compromised	1.045	Compromised	0	0.150856	Compromised	0.160885	Compromised	0.15587	0.895112	1.89	7.93	4.11	3.57	A_33_P3358855	Unknown
A_33_P3358905	0.032908	Detected	-0.032908	Detected	0	0.0700421	Detected	0.199125	Detected	0.134584	0.204327	30.8	29	30	28.3	A_33_P3358905	Unknown
A_33_P3359285	0.0072813	Compromised	-0.0072813	Compromised	0	-0.145886	Compromised	0.193575	Compromised	0.0238445	0.901239	2.05	2	1.75	1.91	A_33_P3359285	Unknown
A_33_P3359408	-0.723184	Compromised	0.723184	Compromised	0	0.125513	Compromised	-0.571655	Compromised	-0.223071	0.807207	2.1	5.64	3.59	1.91	A_33_P3359408	Unknown
A_33_P3359428	-0.0475311	Compromised	0.0475307	Compromised	-2.39e-07	-0.0746799	Compromised	0.20234	Compromised	0.0638301	0.705456	1.9	2	1.77	1.85	A_33_P3359428	Unknown
A_33_P3359832	-0.00655651	Compromised	0.00655603	Compromised	-2.385e-07	-0.117321	Compromised	0.191847	Compromised	0.0372627	0.83212	1.82	1.81	1.6	1.71	A_33_P3359832	Unknown
A_33_P3359846	-0.51053	Compromised	0.510531	Compromised	2.25e-07	0.703667	Compromised	-0.491072	Compromised	0.106297	0.904783	2.47	4.94	5.44	2.05	A_33_P3359846	Unknown
A_33_P3359869	0.175864	Detected	-0.175864	Compromised	-1.2e-07	0.106004	Detected	-1.09009	Compromised	-0.492042	0.512634	9.31	7.19	8.42	3.17	A_33_P3359869	Unknown
A_33_P3360007	-0.0105305	Compromised	0.0105309	Compromised	2.385e-07	0.53201	Compromised	1.02066	Compromised	0.776334	0.0865422	1.96	1.96	2.71	3.28	A_33_P3360007	Unknown
A_33_P3360758	0.699338	Detected	-0.699338	Compromised	0	-1.06899	Compromised	-0.79093	Compromised	-0.92996	0.322051	16.4	6.13	4.57	4.78	A_33_P3360758	Unknown
A_33_P3361217	-0.403576	Compromised	0.403576	Compromised	-1.2e-07	0.126309	Compromised	-0.109867	Compromised	0.00822115	0.986177	5.37	9.26	7.36	5.39	A_33_P3361217	Unknown
A_33_P3361309	0.0744314	Detected	-0.0744319	Detected	-2.38e-07	-0.124228	Detected	0.0526743	Detected	-0.0357769	0.786222	24300	21600	20100	19600	A_33_P3361309	Unknown
A_33_P3362239	0.0050385	Detected	-0.0050385	Detected	0	0.303265	Detected	-0.537262	Detected	-0.116998	0.806867	281	275	328	158	A_33_P3362239	Unknown
A_33_P3362242	-0.0465054	Compromised	0.0465054	Compromised	0	-0.0732837	Compromised	0.233619	Compromised	0.0801678	0.666682	1.76	1.85	1.64	1.75	A_33_P3362242	Unknown
A_33_P3362320	0.0684571	Compromised	-0.0684576	Compromised	-2.35e-07	-0.163623	Compromised	-1.14053	Compromised	-0.652077	0.317095	5.11	4.58	4.13	1.81	A_33_P3362320	Unknown
A_33_P3362392	-0.274345	Compromised	0.274345	Compromised	0	-1.09099	Compromised	-0.785181	Compromised	-0.938086	0.0961942	3.08	4.44	1.66	1.77	A_33_P3362392	Unknown
A_33_P3362548	-0.0585768	Detected	0.0585768	Detected	0	0.0449069	Detected	0.171273	Detected	0.10809	0.336386	75.5	80.7	77	72.5	A_33_P3362548	Unknown
A_33_P3362567	0.100177	Detected	-0.100177	Detected	0	-0.119778	Detected	-0.102781	Detected	-0.111279	0.383665	492	422	401	350	A_33_P3362567	Unknown
A_33_P3362601	0.100978	Compromised	-0.100979	Compromised	-2.38e-07	-1.11426	Compromised	-0.829317	Compromised	-0.971789	0.030807	3.84	3.29	1.57	1.65	A_33_P3362601	Unknown
A_33_P3362937	-0.0489092	Compromised	0.0489092	Compromised	0	-0.105803	Compromised	0.853019	Compromised	0.373608	0.519289	1.83	1.93	1.67	2.8	A_33_P3362937	Unknown
A_33_P3363100	-0.174318	Detected	0.174318	Detected	0	-0.142285	Detected	-0.449874	Detected	-0.296079	0.330784	20.4	25.6	19.8	13.8	A_33_P3363100	Unknown
A_33_P3363105	-0.860097	Compromised	0.860097	Compromised	0	-0.872459	Compromised	-0.563291	Compromised	-0.717875	0.497716	1.7	5.52	1.6	1.71	A_33_P3363105	Unknown
A_33_P3363161	-0.0493221	Compromised	0.0493226	Compromised	2.375e-07	-0.0990272	Compromised	0.214911	Compromised	0.0579419	0.758369	1.81	1.91	1.66	1.78	A_33_P3363161	Unknown
A_33_P3363173	0.113719	Detected	-0.113719	Detected	0	-0.232318	Detected	-0.243505	Detected	-0.237912	0.17184	15.8	13.3	11.8	10.1	A_33_P3363173	Unknown
A_33_P3363254	0.0480235	Detected	-0.0480235	Detected	0	-0.333254	Detected	0.044687	Detected	-0.144283	0.536375	29.5	27.2	21.5	24.1	A_33_P3363254	Unknown
A_33_P3363290	-0.0549979	Compromised	0.0549974	Compromised	-2.38e-07	-0.0657964	Compromised	0.233347	Compromised	0.0837755	0.651573	1.73	1.84	1.63	1.73	A_33_P3363290	Unknown
A_33_P3363507	-0.0330744	Compromised	0.0330749	Compromised	2.38e-07	-0.0772724	Compromised	0.519577	Compromised	0.221152	0.538073	1.89	1.95	1.74	2.27	A_33_P3363507	Unknown
A_33_P3363650	-0.0535502	Compromised	0.0535507	Compromised	2.385e-07	-0.104712	Compromised	0.20219	Compromised	0.048739	0.792565	1.79	1.9	1.64	1.75	A_33_P3363650	Unknown
A_33_P3363690	-0.412419	Compromised	0.412419	Compromised	2.4e-07	-0.432096	Compromised	0.616224	Compromised	0.0920644	0.902856	1.73	3.02	1.62	2.89	A_33_P3363690	Unknown
A_33_P3363893	0.106579	Compromised	-0.10658	Compromised	-2.38e-07	0.877315	Compromised	-0.429157	Compromised	0.224079	0.767185	3.47	2.95	5.62	1.96	A_33_P3363893	Unknown
A_33_P3363959	0.715392	Compromised	-0.715392	Compromised	2.3e-07	-0.846091	Compromised	-0.563585	Compromised	-0.704838	0.435727	5.69	2.08	1.83	1.92	A_33_P3363959	Unknown
A_33_P3364358	-0.0510669	Compromised	0.0510664	Compromised	-2.375e-07	-0.0796766	Compromised	0.237278	Compromised	0.0788009	0.682644	1.73	1.83	1.61	1.73	A_33_P3364358	Unknown
A_33_P3364493	0.0566199	Detected	-0.0566199	Detected	0	0.342618	Detected	-0.743166	Detected	-0.200274	0.748869	108	98.4	125	50.8	A_33_P3364493	Unknown
A_33_P3364498	0.0823238	Detected	-0.0823238	Detected	0	0.455611	Detected	0.957201	Detected	0.706406	0.115859	919	808	1130	1380	A_33_P3364498	Unknown
A_33_P3364836	0.119403	Detected	-0.119403	Detected	1.175e-07	0.137921	Detected	0.462196	Detected	0.300059	0.27465	18.2	15.2	17.5	18.9	A_33_P3364836	Unknown
A_33_P3364929	-0.0214329	Compromised	0.0214329	Compromised	0	-0.167504	Compromised	0.128676	Compromised	-0.0194137	0.908642	1.97	2	1.69	1.79	A_33_P3364929	Unknown
A_33_P3365057	0.209968	Compromised	-0.209968	Compromised	0	-0.335963	Compromised	0.913351	Compromised	0.288694	0.704103	2.43	1.79	1.58	3.24	A_33_P3365057	Unknown
A_33_P3365200	-0.564742	Compromised	0.564742	Compromised	2.5e-07	-0.685305	Compromised	0.282528	Compromised	-0.201388	0.81194	2.05	4.42	1.79	3.02	A_33_P3365200	Unknown
A_33_P3365267	-0.385692	Detected	0.385693	Detected	1.2e-07	-0.321818	Detected	-0.288395	Detected	-0.305107	0.512167	12.9	21.7	12.8	11.3	A_33_P3365267	Unknown
A_33_P3365501	0.469106	Compromised	-0.469106	Compromised	-2.4e-07	-0.529552	Compromised	0.25788	Compromised	-0.135836	0.845059	9.43	4.85	4.48	6.67	A_33_P3365501	Unknown
A_33_P3365644	0.509087	Compromised	-0.509087	Compromised	0	-0.476906	Compromised	-1.35067	Compromised	-0.913786	0.306277	8.2	3.99	3.93	1.85	A_33_P3365644	Unknown
A_33_P3365666	0.121583	Detected	-0.121583	Detected	0	-0.230326	Detected	0.355251	Detected	0.0624626	0.862015	48.4	40.3	36	46.6	A_33_P3365666	Unknown
A_33_P3365845	0.576718	Compromised	-0.576718	Compromised	-2.4e-07	0.663943	Compromised	1.09785	Compromised	0.880899	0.289073	4.74	2.1	4.78	5.57	A_33_P3365845	Unknown
A_33_P3365963	0.107098	Detected	-0.107098	Detected	0	-0.129651	Detected	0.326402	Detected	0.0983758	0.733838	1070	909	862	1020	A_33_P3365963	Unknown
A_33_P3366179	-0.844459	Compromised	0.844458	Compromised	-2.5e-07	-0.873888	Compromised	-0.579572	Compromised	-0.72673	0.485824	1.86	5.91	1.73	1.83	A_33_P3366179	Unknown
A_33_P3366224	-0.00526524	Detected	0.00526571	Detected	2.3835e-07	-0.108639	Detected	-0.360776	Detected	-0.234708	0.203944	2750	2730	2430	1760	A_33_P3366224	Unknown
A_33_P3366321	-0.044796	Compromised	0.0447965	Compromised	2.385e-07	-0.0748115	Compromised	0.219962	Compromised	0.0725753	0.683937	1.85	1.94	1.72	1.82	A_33_P3366321	Unknown
A_33_P3366412	0.238493	Detected	-0.238493	Compromised	0	0.348083	Detected	0.230854	Detected	0.289468	0.359767	12.4	8.78	12.7	10.1	A_33_P3366412	Unknown
A_33_P3366471	-0.0552483	Compromised	0.0552483	Compromised	0	-0.0844836	Compromised	0.233097	Compromised	0.0743067	0.701709	1.72	1.83	1.6	1.72	A_33_P3366471	Unknown
A_33_P3366493	-0.238215	Compromised	0.238215	Compromised	0	0.982927	Compromised	2.04516	Detected	1.51405	0.121462	2.91	3.99	6.44	11.6	A_33_P3366493	Unknown
A_33_P3366614	-0.0512953	Compromised	0.0512958	Compromised	2.385e-07	0.545908	Compromised	0.228638	Compromised	0.387273	0.14585	1.72	1.82	2.47	1.71	A_33_P3366614	Unknown
A_33_P3366739	0.596918	Compromised	-0.596919	Compromised	-2.5e-07	-0.380448	Compromised	-0.422246	Compromised	-0.401347	0.570838	4.48	1.93	2.16	1.81	A_33_P3366739	Unknown
A_33_P3367681	-0.051527	Compromised	0.0515275	Compromised	2.385e-07	-0.0813951	Compromised	0.236818	Compromised	0.0777116	0.687851	1.71	1.81	1.59	1.71	A_33_P3367681	Unknown
A_33_P3367970	0.0990784	Detected	-0.0990784	Detected	0	0.0129669	Detected	0.0366085	Detected	0.0247877	0.826989	22.7	19.5	20.3	17.8	A_33_P3367970	Unknown
A_33_P3368034	0.0538845	Compromised	-0.053884	Compromised	2.38e-07	-0.18571	Compromised	0.824546	Compromised	0.319418	0.593731	1.99	1.82	1.6	2.78	A_33_P3368034	Unknown
A_33_P3368144	0.261497	Detected	-0.261497	Detected	-1.2e-07	-0.676226	Detected	-1.17231	Compromised	-0.924266	0.124332	22.6	15.5	11.2	6.85	A_33_P3368144	Unknown
A_33_P3368303	-0.0501752	Compromised	0.0501752	Compromised	0	-0.0939512	Compromised	0.221776	Compromised	0.0639122	0.736792	1.77	1.87	1.63	1.75	A_33_P3368303	Unknown
A_33_P3368445	0.201075	Detected	-0.201075	Compromised	-1.2e-07	-0.590773	Compromised	-1.90137	Compromised	-1.24607	0.210713	11.8	8.8	6.47	2.25	A_33_P3368445	Unknown
A_33_P3368822	-0.0425959	Compromised	0.0425959	Compromised	0	-0.129245	Compromised	0.178636	Compromised	0.0246952	0.891321	1.98	2.07	1.77	1.89	A_33_P3368822	Unknown
A_33_P3368900	-0.0166566	Detected	0.0166566	Detected	0	-0.104193	Detected	0.331935	Detected	0.113871	0.6545	46.9	47.3	41.9	48.9	A_33_P3368900	Unknown
A_33_P3369398	-0.0370398	Compromised	0.0370402	Compromised	2.385e-07	-0.0742044	Compromised	0.212206	Compromised	0.0690007	0.686751	1.87	1.94	1.73	1.82	A_33_P3369398	Unknown
A_33_P3369731	0.102056	Detected	-0.102057	Detected	-1.2e-07	-0.463054	Detected	-2.63823	Compromised	-1.55064	0.291569	17.3	14.8	11.1	2.12	A_33_P3369731	Unknown
A_33_P3369864	-0.0503941	Compromised	0.0503945	Compromised	2.375e-07	-0.0948744	Compromised	0.221463	Compromised	0.0632944	0.739687	1.76	1.86	1.62	1.74	A_33_P3369864	Unknown
A_33_P3370217	-0.0439148	Compromised	0.0439153	Compromised	2.375e-07	-0.129278	Compromised	0.166428	Compromised	0.0185747	0.915151	1.9	1.99	1.7	1.8	A_33_P3370217	Unknown
A_33_P3370325	0.126629	Compromised	-0.126629	Compromised	0	-0.283696	Compromised	0.907522	Compromised	0.311913	0.659444	2.31	1.91	1.65	3.25	A_33_P3370325	Unknown
A_33_P3370515	0.0316038	Detected	-0.0316038	Detected	0	0.0860949	Detected	0.267861	Detected	0.176978	0.207248	141000	133000	139000	136000	A_33_P3370515	Unknown
A_33_P3370612	-0.0512953	Compromised	0.0512958	Compromised	2.385e-07	-0.0805306	Compromised	0.23705	Compromised	0.0782597	0.685234	1.72	1.82	1.6	1.72	A_33_P3370612	Unknown
A_33_P3371144	-0.0458584	Detected	0.0458579	Detected	-2.385e-07	0.0785232	Detected	0.365231	Detected	0.221877	0.278371	2590	2720	2680	2820	A_33_P3371144	Unknown
A_33_P3371243	-0.0481095	Compromised	0.0481095	Compromised	0	1.0613	Compromised	0.209042	Compromised	0.63517	0.276739	1.87	1.97	3.83	1.83	A_33_P3371243	Unknown
A_33_P3371260	-0.52642	Compromised	0.52642	Compromised	-1e-07	-0.185075	Compromised	-1.29376	Compromised	-0.739417	0.435471	4.49	9.18	5.4	2.16	A_33_P3371260	Unknown
A_33_P3371450	0.181494	Compromised	-0.181494	Compromised	0	-0.303705	Compromised	-0.0345044	Compromised	-0.169105	0.532266	2.61	2	1.77	1.84	A_33_P3371450	Unknown
A_33_P3371769	0.000209093	Detected	-0.000209093	Detected	0	-0.0664628	Detected	0.259844	Detected	0.0966907	0.613507	2030	2000	1840	1990	A_33_P3371769	Unknown
A_33_P3372090	0.150433	Detected	-0.150433	Detected	0	-0.382697	Detected	0.0803249	Detected	-0.151186	0.638918	25	20	16.4	19.5	A_33_P3372090	Unknown
A_33_P3372104	0.63006	Compromised	-0.63006	Compromised	0	0.390105	Compromised	0.0431013	Compromised	0.216603	0.771816	5.76	2.37	4.63	3.14	A_33_P3372104	Unknown
A_33_P3372207	0.217557	Detected	-0.217557	Detected	0	-0.105101	Detected	-1.11692	Compromised	-0.611012	0.38275	16.6	12.1	12.6	5.39	A_33_P3372207	Unknown
A_33_P3372659	-0.539851	Compromised	0.539852	Compromised	2.35e-07	0.780854	Compromised	-0.656082	Compromised	0.0623863	0.950972	2.29	4.77	5.43	1.73	A_33_P3372659	Unknown
A_33_P3373009	-0.0316448	Compromised	0.0316448	Compromised	0	-0.0448995	Compromised	0.846417	Compromised	0.400759	0.464384	2.02	2.08	1.9	3.04	A_33_P3373009	Unknown
A_33_P3373014	-0.0565901	Compromised	0.0565896	Compromised	-2.385e-07	-0.105579	Compromised	0.389297	Compromised	0.141859	0.632469	1.82	1.94	1.67	2.03	A_33_P3373014	Unknown
A_33_P3373119	-0.122732	Compromised	0.122732	Compromised	1.19e-07	0.414997	Detected	0.219149	Compromised	0.317073	0.180883	8.2	9.58	11.3	8.51	A_33_P3373119	Unknown
A_33_P3373194	0.482664	Compromised	-0.482664	Compromised	2.35e-07	-0.616439	Compromised	-0.342759	Compromised	-0.479599	0.439972	4.22	2.13	1.87	1.95	A_33_P3373194	Unknown
A_33_P3373200	0.154274	Detected	-0.154274	Detected	0	0.698206	Detected	-1.80354	Detected	-0.552668	0.703842	61.2	48.7	84.7	12.9	A_33_P3373200	Unknown
A_33_P3373418	-0.0597324	Compromised	0.0597324	Compromised	0	-0.0811391	Compromised	0.237074	Compromised	0.0779676	0.691431	1.7	1.82	1.59	1.71	A_33_P3373418	Unknown
A_33_P3373580	-0.679554	Compromised	0.679555	Compromised	2.4e-07	-0.525598	Compromised	0.399844	Compromised	-0.0628767	0.945999	1.78	4.5	1.88	3.08	A_33_P3373580	Unknown
A_33_P3373584	-0.0398283	Compromised	0.0398278	Compromised	-2.38e-07	-0.130919	Compromised	0.163855	Compromised	0.0164678	0.923949	1.93	2.01	1.72	1.82	A_33_P3373584	Unknown
A_33_P3373690	-0.169835	Compromised	0.169835	Compromised	0	1.80217	Compromised	0.118511	Compromised	0.960342	0.379753	1.74	2.17	6.48	1.74	A_33_P3373690	Unknown
A_33_P3373715	-0.365236	Detected	0.365236	Detected	1.15e-07	-0.309763	Detected	-0.146792	Detected	-0.228278	0.603928	14.8	24.2	14.6	14.1	A_33_P3373715	Unknown
A_33_P3373795	-0.548664	Compromised	0.548664	Compromised	0	-0.584923	Compromised	-0.268586	Compromised	-0.426754	0.532762	1.75	3.69	1.62	1.74	A_33_P3373795	Unknown
A_33_P3373970	0.231699	Compromised	-0.231699	Compromised	2.4e-07	0.227183	Compromised	-0.106668	Compromised	0.0602577	0.852427	2.98	2.13	2.82	1.93	A_33_P3373970	Unknown
A_33_P3374215	-0.0806763	Detected	0.0806763	Detected	0	-0.00557494	Detected	0.189133	Detected	0.0917792	0.543361	23.5	25.9	23.5	23.2	A_33_P3374215	Unknown
A_33_P3374253	0.0824444	Detected	-0.0824444	Detected	0	-0.0828526	Detected	-0.400123	Detected	-0.241488	0.309304	43	37.8	36.4	25.2	A_33_P3374253	Unknown
A_33_P3374365	0.0899932	Detected	-0.0899932	Detected	0	0.479968	Detected	1.8367	Detected	1.15834	0.232588	123	107	153	338	A_33_P3374365	Unknown
A_33_P3374903	0.0390167	Detected	-0.0390167	Detected	0	-0.0666604	Detected	0.100328	Detected	0.0168338	0.871906	46.7	43.6	41.2	39.9	A_33_P3374903	Unknown
A_33_P3374982	-0.4601	Compromised	0.4601	Compromised	0	-0.348357	Compromised	-0.913366	Compromised	-0.630862	0.363055	3.11	5.8	3.19	1.86	A_33_P3374982	Unknown
A_33_P3375026	-0.0897455	Detected	0.0897453	Detected	-1.2e-07	0.0234909	Detected	-0.768292	Compromised	-0.372401	0.455784	11.2	12.5	11.5	5.73	A_33_P3375026	Unknown
A_33_P3375269	0.104776	Compromised	-0.104776	Compromised	0	-0.694592	Compromised	-0.0344615	Compromised	-0.364527	0.402914	6.16	5.25	3.36	4.58	A_33_P3375269	Unknown
A_33_P3375348	-0.398542	Detected	0.398542	Detected	0	-0.261446	Detected	-0.030112	Detected	-0.145779	0.758929	9.11	15.6	9.51	9.63	A_33_P3375348	Unknown
A_33_P3375496	-0.0668449	Detected	0.0668449	Detected	0	-0.00412798	Detected	0.0653806	Detected	0.0306263	0.723742	234	253	232	210	A_33_P3375496	Unknown
A_33_P3375513	0.207354	Compromised	-0.207354	Compromised	2.4e-07	0.31575	Compromised	-0.0341916	Compromised	0.140779	0.655548	2.57	1.9	2.63	1.78	A_33_P3375513	Unknown
A_33_P3375626	-0.0105309	Compromised	0.0105305	Compromised	-2.385e-07	-0.0774488	Compromised	0.216414	Compromised	0.0694826	0.683604	1.92	1.92	1.74	1.84	A_33_P3375626	Unknown
A_33_P3375657	-0.249762	Compromised	0.249763	Compromised	2.4e-07	0.71155	Compromised	1.04667	Compromised	0.879108	0.0998267	1.78	2.48	3.29	3.58	A_33_P3375657	Unknown
A_33_P3375794	-0.0555019	Compromised	0.0555015	Compromised	-2.39e-07	-0.0763249	Compromised	0.232843	Compromised	0.0782592	0.680714	1.71	1.82	1.6	1.71	A_33_P3375794	Unknown
A_33_P3375889	0.829192	Compromised	-0.829191	Compromised	2.5e-07	-0.979351	Compromised	0.677128	Compromised	-0.151111	0.909204	6.31	1.97	1.71	4.65	A_33_P3375889	Unknown
A_33_P3375899	0.159241	Detected	-0.159241	Compromised	0	0.177199	Detected	-0.678199	Compromised	-0.2505	0.638177	10.3	8.14	9.9	4.72	A_33_P3375899	Unknown
A_33_P3375910	-0.241483	Detected	0.241482	Detected	-1.15e-07	-0.76296	Compromised	0.139121	Detected	-0.311919	0.604116	10.6	14.6	7.01	11.3	A_33_P3375910	Unknown
A_33_P3376021	-0.051527	Compromised	0.0515275	Compromised	2.385e-07	-0.0813951	Compromised	0.236818	Compromised	0.0777116	0.687851	1.71	1.81	1.59	1.71	A_33_P3376021	Unknown
A_33_P3376075	-0.00496054	Detected	0.00496054	Detected	0	-0.175246	Detected	0.195691	Detected	0.0102224	0.96107	39	38.7	32.9	36.7	A_33_P3376075	Unknown
A_33_P3376273	0.20884	Detected	-0.20884	Compromised	1.2e-07	-0.0924344	Detected	-0.339316	Compromised	-0.215875	0.467431	13.5	9.96	10.4	7.56	A_33_P3376273	Unknown
A_33_P3376745	-0.559289	Compromised	0.559289	Compromised	0	-0.638434	Compromised	0.35382	Compromised	-0.142307	0.866608	2.86	6.12	2.57	4.41	A_33_P3376745	Unknown
A_33_P3376781	-0.00790763	Detected	0.00790763	Detected	0	0.0802267	Detected	0.361882	Detected	0.221054	0.257583	551	549	556	583	A_33_P3376781	Unknown
A_33_P3376836	0.0565155	Detected	-0.0565155	Detected	0	-0.17123	Detected	-0.341772	Detected	-0.256501	0.128993	1690	1540	1370	1050	A_33_P3376836	Unknown
A_33_P3377274	-0.0823832	Detected	0.0823832	Detected	0	0.00703812	Detected	-0.0883493	Detected	-0.0406556	0.7109	40.1	44.3	40.5	32.7	A_33_P3377274	Unknown
A_33_P3377714	-0.302243	Compromised	0.302243	Compromised	0	-0.628418	Compromised	-0.886065	Compromised	-0.757241	0.147663	3.13	4.69	2.37	1.71	A_33_P3377714	Unknown
A_33_P3378269	-0.0512953	Compromised	0.0512958	Compromised	2.385e-07	1.00693	Compromised	0.228638	Compromised	0.617785	0.256162	1.72	1.82	3.4	1.71	A_33_P3378269	Unknown
A_33_P3378412	-0.0105307	Detected	0.0105307	Detected	0	0.00402927	Detected	-0.882999	Compromised	-0.439485	0.426271	14.6	14.6	14	6.53	A_33_P3378412	Unknown
A_33_P3378684	-0.0435753	Compromised	0.0435753	Compromised	0	0.221351	Compromised	0.214396	Compromised	0.217874	0.0379773	1.92	2.01	2.19	1.88	A_33_P3378684	Unknown
A_33_P3378737	0.0825987	Compromised	-0.0825987	Compromised	0	-0.772337	Compromised	0.621228	Compromised	-0.0755549	0.924079	3.22	2.83	1.69	3.83	A_33_P3378737	Unknown
A_33_P3379056	0.0492013	Detected	-0.0492013	Detected	0	0.175916	Detected	-0.569941	Detected	-0.197012	0.652707	30.2	27.8	31.3	16.1	A_33_P3379056	Unknown
A_33_P3379136	-0.0560174	Compromised	0.0560174	Compromised	0	-0.0689125	Compromised	0.240839	Compromised	0.0859635	0.653752	1.69	1.8	1.59	1.7	A_33_P3379136	Unknown
A_33_P3379231	-0.0523596	Compromised	0.0523601	Compromised	2.39e-07	-0.0814152	Compromised	0.184847	Compromised	0.0517158	0.752342	2.01	2.13	1.87	1.94	A_33_P3379231	Unknown
A_33_P3379776	-0.055758	Compromised	0.055758	Compromised	0	-0.0681195	Compromised	0.241049	Compromised	0.0864646	0.651303	1.7	1.81	1.6	1.71	A_33_P3379776	Unknown
A_33_P3380006	1.24376	Detected	-1.24376	Compromised	2.5e-07	-0.131145	Compromised	-0.921733	Compromised	-0.526439	0.725706	10.3	1.81	3.77	1.88	A_33_P3380006	Unknown
A_33_P3380076	-0.0422821	Compromised	0.0422821	Compromised	0	-0.0874748	Compromised	0.18717	Compromised	0.0498474	0.761752	2	2.09	1.84	1.92	A_33_P3380076	Unknown
A_33_P3380252	-0.0444384	Compromised	0.0444388	Compromised	2.39e-07	-0.073288	Compromised	0.212713	Compromised	0.0697124	0.687322	1.87	1.96	1.74	1.83	A_33_P3380252	Unknown
A_33_P3380913	0.0781674	Detected	-0.0781674	Detected	0	-0.289861	Detected	-0.784166	Detected	-0.537014	0.174092	24.2	21.4	17.8	10.9	A_33_P3380913	Unknown
A_33_P3381132	0.104722	Detected	-0.104722	Compromised	1.175e-07	-0.880757	Compromised	-2.2357	Compromised	-1.55823	0.15092	10.7	9.12	5.13	1.73	A_33_P3381132	Unknown
A_33_P3381292	0.0537796	Detected	-0.0537796	Detected	0	0.0141106	Detected	0.804639	Detected	0.409375	0.41268	68	62.2	62.8	93.7	A_33_P3381292	Unknown
A_33_P3381305	-0.167109	Detected	0.167109	Detected	0	0.302389	Detected	-0.548119	Detected	-0.122865	0.813203	264	328	347	166	A_33_P3381305	Unknown
A_33_P3381443	-0.0173678	Compromised	0.0173683	Compromised	2.385e-07	-0.156666	Compromised	0.164062	Compromised	0.00369811	0.983792	2.1	2.12	1.81	1.95	A_33_P3381443	Unknown
A_33_P3381613	-0.309417	Compromised	0.309417	Detected	1.15e-07	-0.107378	Compromised	-1.35633	Compromised	-0.731854	0.403839	5.98	9.05	6.53	2.37	A_33_P3381613	Unknown
A_33_P3381762	-0.0909421	Detected	0.0909421	Detected	0	0.24208	Detected	0.963338	Detected	0.602709	0.246558	424	474	507	721	A_33_P3381762	Unknown
A_33_P3381796	-0.253712	Compromised	0.253711	Compromised	-1.2e-07	-0.857119	Compromised	-0.0906992	Compromised	-0.473909	0.41084	6.61	9.26	4.13	6.06	A_33_P3381796	Unknown
A_33_P3382105	-0.0224321	Detected	0.0224321	Detected	0	0.102467	Detected	-0.209945	Detected	-0.0537391	0.765898	541	550	560	389	A_33_P3382105	Unknown
A_33_P3382111	-0.258607	Detected	0.258607	Detected	0	-0.468236	Detected	-0.241935	Detected	-0.355085	0.335385	13.4	18.9	11	11.1	A_33_P3382111	Unknown
A_33_P3382118	-0.101468	Detected	0.101468	Detected	0	-0.103139	Detected	-0.310785	Detected	-0.206962	0.290056	521	591	494	369	A_33_P3382118	Unknown
A_33_P3382137	-0.751695	Compromised	0.751695	Compromised	0	-1.09784	Compromised	-0.592825	Compromised	-0.845331	0.398062	2.33	6.51	1.74	2.13	A_33_P3382137	Unknown
A_33_P3382634	0.443265	Detected	-0.443265	Detected	0	-0.0609927	Detected	-0.251646	Detected	-0.156319	0.763147	25.7	13.7	17.2	13	A_33_P3382634	Unknown
A_33_P3382685	-0.0469089	Compromised	0.0469089	Compromised	0	-0.0749011	Compromised	0.233121	Compromised	0.0791099	0.671791	1.74	1.83	1.62	1.73	A_33_P3382685	Unknown
A_33_P3382949	-0.188163	Compromised	0.188163	Compromised	0	-0.425652	Compromised	-0.445506	Compromised	-0.435579	0.146968	3.08	3.94	2.48	2.11	A_33_P3382949	Unknown
A_33_P3383009	0.641065	Compromised	-0.641065	Compromised	2.3e-07	0.26291	Compromised	-0.728065	Compromised	-0.232577	0.80108	6.12	2.48	4.47	1.94	A_33_P3383009	Unknown
A_33_P3383075	0.914302	Compromised	-0.914302	Compromised	0	-0.683673	Compromised	0.707598	Compromised	0.0119624	0.992637	6.92	1.92	2.17	4.91	A_33_P3383075	Unknown
A_33_P3383084	-0.0491147	Compromised	0.0491147	Compromised	0	-0.0724168	Compromised	0.223289	Compromised	0.0754361	0.676082	1.82	1.92	1.7	1.8	A_33_P3383084	Unknown
A_33_P3383371	0.123355	Detected	-0.123355	Detected	0	-0.22978	Detected	-0.309583	Detected	-0.269681	0.173026	183	152	136	111	A_33_P3383371	Unknown
A_33_P3383486	-0.0179291	Compromised	0.0179296	Compromised	2.385e-07	-0.150423	Compromised	1.02365	Compromised	0.436614	0.5347	1.94	1.96	1.68	3.27	A_33_P3383486	Unknown
A_33_P3383531	-0.923731	Compromised	0.923731	Compromised	0	1.22296	Compromised	-0.136838	Compromised	0.54306	0.682524	1.72	6.1	7.23	2.43	A_33_P3383531	Unknown
A_33_P3383762	0.0305698	Detected	-0.0305698	Detected	0	-0.477074	Detected	0.0460813	Detected	-0.215496	0.499189	32.5	30.7	21.7	26.9	A_33_P3383762	Unknown
A_33_P3383900	0.591458	Compromised	-0.591457	Compromised	2.35e-07	0.522016	Compromised	0.0428839	Compromised	0.28245	0.701309	4.93	2.14	4.46	2.76	A_33_P3383900	Unknown
A_33_P3384255	0.659756	Compromised	-0.659756	Compromised	0	0.275137	Compromised	0.973352	Compromised	0.624245	0.490983	6.23	2.46	4.53	6.34	A_33_P3384255	Unknown
A_33_P3384337	0.143414	Compromised	-0.143414	Compromised	2.4e-07	-1.44978	Compromised	-0.707217	Compromised	-1.0785	0.113477	5.88	4.75	1.85	2.67	A_33_P3384337	Unknown
A_33_P3384427	-0.0570855	Compromised	0.0570855	Compromised	0	-0.0729575	Compromised	0.21514	Compromised	0.0710914	0.691407	1.8	1.92	1.69	1.78	A_33_P3384427	Unknown
A_33_P3384552	-0.165582	Compromised	0.165582	Compromised	2.4e-07	-0.158296	Compromised	0.0930162	Compromised	-0.0326397	0.889643	1.96	2.43	1.87	1.92	A_33_P3384552	Unknown
A_33_P3384913	0.275278	Compromised	-0.275278	Compromised	0	-0.399155	Compromised	-0.0815744	Compromised	-0.240365	0.528388	2.69	1.81	1.6	1.72	A_33_P3384913	Unknown
A_33_P3384942	-0.045917	Compromised	0.0459175	Compromised	2.38e-07	-0.0709271	Compromised	0.226218	Compromised	0.0776455	0.667078	1.79	1.88	1.67	1.77	A_33_P3384942	Unknown
A_33_P3385351	0.048254	Detected	-0.048254	Detected	0	0.635417	Detected	0.0969596	Detected	0.366189	0.31252	115	106	164	97.4	A_33_P3385351	Unknown
A_33_P3385431	-0.028255	Compromised	0.028255	Compromised	0	-0.128472	Compromised	0.194001	Compromised	0.0327647	0.859863	2.01	2.06	1.78	1.92	A_33_P3385431	Unknown
A_33_P3385441	-0.0552483	Compromised	0.0552483	Compromised	0	-0.0665617	Compromised	0.233097	Compromised	0.0832677	0.654059	1.72	1.83	1.62	1.72	A_33_P3385441	Unknown
A_33_P3385671	0.451442	Compromised	-0.451442	Compromised	0	-0.580055	Compromised	0.00555944	Compromised	-0.287248	0.646846	3.51	1.85	1.63	2.11	A_33_P3385671	Unknown
A_33_P3385912	0.335237	Compromised	-0.335236	Compromised	2.4e-07	-0.457447	Compromised	-0.188246	Compromised	-0.322846	0.46579	3.23	2	1.77	1.84	A_33_P3385912	Unknown
A_33_P3386147	0.0646276	Compromised	-0.0646276	Compromised	0	-0.296728	Compromised	-0.050971	Compromised	-0.173849	0.337086	4.75	4.28	3.51	3.59	A_33_P3386147	Unknown
A_33_P3386487	-0.0465054	Compromised	0.0465054	Compromised	0	-0.0821075	Compromised	0.225352	Compromised	0.0716221	0.699271	1.76	1.85	1.63	1.74	A_33_P3386487	Unknown
A_33_P3387016	-0.57622	Compromised	0.57622	Compromised	0	-0.836866	Compromised	-0.281774	Compromised	-0.55932	0.474059	2.36	5.17	1.87	2.37	A_33_P3387016	Unknown
A_33_P3387075	-0.241321	Compromised	0.241321	Compromised	0	0.761024	Compromised	0.261965	Compromised	0.511495	0.278531	3.05	4.2	5.8	3.54	A_33_P3387075	Unknown
A_33_P3387095	0.205713	Compromised	-0.205713	Compromised	0	-0.132648	Compromised	1.11021	Detected	0.488784	0.533092	6.1	4.52	4.58	9.35	A_33_P3387095	Unknown
A_33_P3387429	-0.146841	Compromised	0.146841	Compromised	0	-0.649507	Compromised	1.29206	Detected	0.321279	0.774573	5	6.04	3.35	11.1	A_33_P3387429	Unknown
A_33_P3387656	-0.0503144	Compromised	0.0503144	Compromised	0	-0.0673313	Compromised	0.177277	Compromised	0.0549729	0.718001	1.94	2.05	1.82	1.86	A_33_P3387656	Unknown
A_33_P3388527	0.116572	Detected	-0.116572	Detected	0	-0.217937	Detected	0.328338	Detected	0.0552006	0.869686	61.9	51.9	46.6	58.7	A_33_P3388527	Unknown
A_33_P3388883	-0.162786	Detected	0.162786	Detected	0	0.39258	Detected	0.269606	Detected	0.331093	0.197412	20	24.7	27.9	22.1	A_33_P3388883	Unknown
A_33_P3389028	-0.601394	Compromised	0.601395	Compromised	2.25e-07	0.093792	Compromised	-0.358671	Compromised	-0.13244	0.855775	2.57	5.83	3.95	2.49	A_33_P3389028	Unknown
A_33_P3389578	0.063791	Detected	-0.063791	Detected	0	0.297941	Detected	-0.522332	Detected	-0.112196	0.812263	42.9	38.7	47.9	23.4	A_33_P3389578	Unknown
A_33_P3389668	-0.122093	Compromised	0.122093	Detected	1.2e-07	0.840949	Detected	0.373159	Detected	0.607054	0.148066	8.43	9.84	15.6	9.73	A_33_P3389668	Unknown
A_33_P3389758	0.406107	Compromised	-0.406107	Compromised	0	0.899325	Detected	0.835315	Compromised	0.86732	0.167015	7.02	3.94	9.38	7.74	A_33_P3389758	Unknown
A_33_P3390086	0.096143	Detected	-0.096143	Detected	0	-0.028641	Detected	-0.369427	Detected	-0.199034	0.416041	371	320	323	220	A_33_P3390086	Unknown
A_33_P3390097	-0.112983	Compromised	0.112983	Compromised	0	0.36406	Compromised	-0.276845	Compromised	0.0436072	0.909623	4.98	5.74	6.58	3.64	A_33_P3390097	Unknown
A_33_P3390387	-0.0487061	Compromised	0.0487061	Compromised	0	-0.113462	Compromised	0.183683	Compromised	0.0351102	0.843178	1.84	1.94	1.67	1.77	A_33_P3390387	Unknown
A_33_P3390678	0.759536	Compromised	-0.759536	Compromised	0	-0.923249	Compromised	-0.352849	Compromised	-0.638049	0.513997	6.02	2.07	1.78	2.28	A_33_P3390678	Unknown
A_33_P3390753	0.0650721	Compromised	-0.0650725	Compromised	-2.4e-07	-0.197995	Compromised	0.0946832	Compromised	-0.051656	0.777642	2.01	1.81	1.59	1.68	A_33_P3390753	Unknown
A_33_P3390823	-0.0558319	Detected	0.0558319	Detected	0	-0.306959	Detected	-0.195302	Detected	-0.251131	0.0862511	75.6	80.5	60.3	56.2	A_33_P3390823	Unknown
A_33_P3390939	0.374376	Compromised	-0.374377	Compromised	-2.35e-07	0.361374	Compromised	-1.62375	Compromised	-0.631188	0.612197	8.44	4.95	7.94	1.73	A_33_P3390939	Unknown
A_33_P3391120	0.617212	Detected	-0.617212	Compromised	-1.2e-07	-1.46232	Compromised	-1.7472	Compromised	-1.60476	0.126833	12.2	5.11	2.74	1.94	A_33_P3391120	Unknown
A_33_P3391295	-0.0549979	Compromised	0.0549974	Compromised	-2.38e-07	0.299721	Compromised	0.224984	Compromised	0.262352	0.0586405	1.73	1.84	2.1	1.72	A_33_P3391295	Unknown
A_33_P3391390	-0.0386844	Compromised	0.0386844	Compromised	0	-0.138901	Compromised	0.160852	Compromised	0.0109754	0.949925	2.01	2.09	1.78	1.89	A_33_P3391390	Unknown
A_33_P3391496	-0.0527787	Detected	0.0527787	Detected	0	-0.842257	Detected	-0.144778	Detected	-0.493518	0.296673	31.5	33.4	17.3	24.2	A_33_P3391496	Unknown
A_33_P3391511	-0.326415	Compromised	0.326415	Detected	-1.2e-07	-2.47199	Compromised	-0.505044	Compromised	-1.48852	0.287392	8.39	13	1.8	6.07	A_33_P3391511	Unknown
A_33_P3391536	0.0125623	Detected	-0.0125623	Detected	0	-0.229332	Detected	-0.14745	Detected	-0.188391	0.0479856	73	70.7	58.6	53.5	A_33_P3391536	Unknown
A_33_P3391970	0.248078	Compromised	-0.248078	Compromised	0	1.66713	Compromised	0.380304	Compromised	1.02372	0.27595	3.12	2.18	7.92	2.8	A_33_P3391970	Unknown
A_33_P3392213	0.00223708	Detected	-0.00223708	Detected	0	-0.208657	Detected	-0.245851	Detected	-0.227254	0.0067251	1140	1120	935	786	A_33_P3392213	Unknown
A_33_P3392350	0.0525782	Detected	-0.0525782	Detected	0	-0.230581	Detected	-0.242152	Detected	-0.236366	0.0466071	382	350	298	255	A_33_P3392350	Unknown
A_33_P3393370	-0.0443499	Detected	0.0443499	Detected	0	-0.0646679	Detected	-0.0493639	Detected	-0.0570159	0.332759	125	131	117	102	A_33_P3393370	Unknown
A_33_P3393398	0.0125704	Detected	-0.0125709	Detected	-2.385e-07	-0.348183	Detected	-0.670433	Detected	-0.509308	0.087656	3490	3380	2580	1780	A_33_P3393398	Unknown
A_33_P3393689	-0.0519772	Compromised	0.0519772	Compromised	0	-0.0730915	Compromised	0.205004	Compromised	0.0659561	0.700267	1.86	1.97	1.74	1.82	A_33_P3393689	Unknown
A_33_P3393702	-0.22435	Compromised	0.22435	Compromised	0	-0.254218	Compromised	0.0639958	Compromised	-0.0951109	0.762476	1.71	2.3	1.59	1.71	A_33_P3393702	Unknown
A_33_P3393708	0.456095	Compromised	-0.456095	Compromised	0	1.23565	Compromised	1.58303	Compromised	1.40934	0.101916	3.59	1.88	5.85	6.42	A_33_P3393708	Unknown
A_33_P3393986	-0.491063	Compromised	0.491063	Compromised	2.4e-07	1.37792	Compromised	1.67949	Compromised	1.5287	0.0967995	1.69	3.29	5.86	6.23	A_33_P3393986	Unknown
A_33_P3394378	-0.0748227	Detected	0.0748227	Detected	0	0.0245259	Detected	-0.0692079	Detected	-0.022341	0.823868	23.6	25.8	24	19.4	A_33_P3394378	Unknown
A_33_P3394965	0.29109	Compromised	-0.29109	Compromised	-2.35e-07	-0.430822	Compromised	-0.130115	Compromised	-0.280468	0.482158	2.78	1.83	1.6	1.7	A_33_P3394965	Unknown
A_33_P3395206	-0.0485048	Compromised	0.0485053	Compromised	2.38e-07	-0.070157	Compromised	0.208304	Compromised	0.0690737	0.685532	1.85	1.95	1.73	1.81	A_33_P3395206	Unknown
A_33_P3395209	-0.058907	Compromised	0.0589075	Compromised	2.39e-07	-0.0697055	Compromised	0.229438	Compromised	0.0798664	0.668552	1.73	1.85	1.63	1.73	A_33_P3395209	Unknown
A_33_P3395289	0.145661	Compromised	-0.145662	Compromised	-2.4e-07	-0.277488	Compromised	0.0316801	Compromised	-0.122904	0.62131	2.26	1.82	1.6	1.71	A_33_P3395289	Unknown
A_33_P3395310	0.0635843	Detected	-0.0635843	Detected	0	0.119123	Detected	-0.0231857	Detected	0.0479689	0.665076	29.7	26.8	29.3	22.9	A_33_P3395310	Unknown
A_33_P3395314	0.947025	Compromised	-0.947025	Compromised	0	-1.10738	Compromised	-0.824131	Compromised	-0.965758	0.419367	7.92	2.1	1.81	1.9	A_33_P3395314	Unknown
A_33_P3395472	-0.0263853	Compromised	0.0263853	Compromised	0	-0.103287	Compromised	0.179498	Compromised	0.0381057	0.815869	1.8	1.84	1.62	1.7	A_33_P3395472	Unknown
A_33_P3395478	-0.0510669	Compromised	0.0510664	Compromised	-2.375e-07	-0.0886655	Compromised	0.228915	Compromised	0.0701249	0.715047	1.73	1.83	1.6	1.72	A_33_P3395478	Unknown
A_33_P3395630	-0.0579243	Compromised	0.0579243	Compromised	0	-0.727182	Compromised	-2.09626	Compromised	-1.41172	0.176226	9.13	9.75	5.45	1.82	A_33_P3395630	Unknown
A_33_P3395788	-0.0530891	Compromised	0.0530891	Compromised	0	1.11088	Compromised	0.219226	Compromised	0.665054	0.276713	1.81	1.92	3.85	1.79	A_33_P3395788	Unknown
A_33_P3395843	-0.0570855	Compromised	0.0570855	Compromised	0	-0.0729575	Compromised	0.21514	Compromised	0.0710914	0.691407	1.8	1.92	1.69	1.78	A_33_P3395843	Unknown
A_33_P3395883	0.0178728	Detected	-0.0178723	Detected	2.38e-07	-0.0320525	Detected	-0.121876	Detected	-0.0769641	0.252332	5180	4980	4750	3850	A_33_P3395883	Unknown
A_33_P3396339	0.681801	Compromised	-0.681801	Compromised	0	-0.806731	Compromised	-0.0360055	Compromised	-0.421368	0.64442	4.7	1.8	1.59	2.34	A_33_P3396339	Unknown
A_33_P3396379	-0.0471783	Compromised	0.0471787	Compromised	2.375e-07	0.687669	Compromised	-0.443499	Compromised	0.122085	0.849624	3.07	3.23	4.85	1.91	A_33_P3396379	Unknown
A_33_P3396434	0.0352192	Detected	-0.0352192	Detected	0	0.0611324	Detected	0.299181	Detected	0.180157	0.283776	179000	168000	173000	176000	A_33_P3396434	Unknown
A_33_P3396469	0.112222	Detected	-0.112222	Detected	0	0.269589	Detected	-0.697961	Detected	-0.214186	0.708297	40.9	34.5	43.3	19.1	A_33_P3396469	Unknown
A_33_P3396477	-0.0442624	Compromised	0.0442619	Compromised	-2.39e-07	-0.114359	Compromised	0.18934	Compromised	0.0374904	0.834701	1.88	1.97	1.7	1.81	A_33_P3396477	Unknown
A_33_P3396771	-0.540566	Compromised	0.540566	Compromised	2.35e-07	1.0797	Detected	-0.944098	Compromised	0.0677992	0.958248	2.94	6.13	8.58	1.82	A_33_P3396771	Unknown
A_33_P3397081	-0.0431395	Compromised	0.0431395	Compromised	0	-0.0897832	Compromised	0.202895	Compromised	0.056556	0.746442	1.73	1.81	1.59	1.68	A_33_P3397081	Unknown
A_33_P3397209	0.540203	Compromised	-0.540203	Compromised	0	-0.655182	Compromised	-0.370385	Compromised	-0.512783	0.455575	4.27	1.99	1.77	1.86	A_33_P3397209	Unknown
A_33_P3397433	-0.164037	Detected	0.164037	Detected	0	-0.0403004	Detected	0.152878	Detected	0.0562887	0.795339	35	43.3	36.2	35.7	A_33_P3397433	Unknown
A_33_P3397473	-0.695812	Compromised	0.695812	Compromised	2.25e-07	-0.83511	Compromised	-0.514381	Compromised	-0.674746	0.444427	2.1	5.43	1.81	1.95	A_33_P3397473	Unknown
A_33_P3397506	0.0805709	Detected	-0.0805709	Detected	0	-0.289011	Detected	-0.861241	Detected	-0.575126	0.192663	118	104	86.7	50.3	A_33_P3397506	Unknown
A_33_P3397573	-0.0497246	Compromised	0.0497246	Compromised	0	-0.0809751	Compromised	0.499212	Compromised	0.209118	0.55107	1.97	2.08	1.83	2.36	A_33_P3397573	Unknown
A_33_P3397593	-0.0140753	Compromised	0.0140758	Compromised	2.385e-07	-0.136704	Compromised	0.193897	Compromised	0.0285964	0.87901	2.03	2.04	1.77	1.92	A_33_P3397593	Unknown
A_33_P3397608	0.21058	Compromised	-0.21058	Compromised	0	-0.331374	Compromised	-0.0239148	Compromised	-0.177644	0.56596	2.5	1.84	1.63	1.74	A_33_P3397608	Unknown
A_33_P3398187	0.488423	Compromised	-0.488423	Compromised	2.4e-07	-0.310246	Compromised	0.255299	Compromised	-0.0274737	0.965598	6.89	3.45	3.76	4.8	A_33_P3398187	Unknown
A_33_P3399181	-0.00342393	Detected	0.00342393	Detected	0	0.133962	Detected	0.326742	Detected	0.230352	0.13954	2040	2020	2130	2100	A_33_P3399181	Unknown
A_33_P3399713	-0.213784	Compromised	0.213784	Compromised	0	-0.398997	Compromised	-0.153513	Compromised	-0.276255	0.378936	2.12	2.81	1.77	1.81	A_33_P3399713	Unknown
A_33_P3399778	0.22669	Detected	-0.22669	Detected	0	-0.394405	Detected	-1.39415	Compromised	-0.894279	0.244806	15.7	11.3	9.69	4.18	A_33_P3399778	Unknown
A_33_P3399911	-0.621342	Compromised	0.621342	Detected	-1.3e-07	-0.506422	Compromised	0.793206	Detected	0.143392	0.887934	5.36	12.5	5.51	11.7	A_33_P3399911	Unknown
A_33_P3400023	-0.057085	Compromised	0.0570855	Compromised	2.385e-07	-0.065752	Compromised	0.178519	Compromised	0.0563834	0.716416	1.95	2.08	1.84	1.88	A_33_P3400023	Unknown
A_33_P3400292	0.0865788	Detected	-0.0865788	Detected	0	-0.662289	Detected	-0.539558	Detected	-0.600924	0.0297993	26.2	22.9	14.8	13.9	A_33_P3400292	Unknown
A_33_P3401068	-0.0347505	Compromised	0.0347509	Compromised	2.4e-07	-0.131335	Compromised	0.151544	Compromised	0.0101044	0.951003	2.05	2.12	1.82	1.91	A_33_P3401068	Unknown
A_33_P3401084	-0.0336158	Detected	0.0336158	Detected	0	-0.00621152	Detected	0.367498	Detected	0.180643	0.441782	1230	1270	1190	1330	A_33_P3401084	Unknown
A_33_P3401138	-0.0962512	Detected	0.0962512	Detected	0	0.0455506	Detected	0.155218	Detected	0.100384	0.46048	31.7	35.7	33.2	30.9	A_33_P3401138	Unknown
A_33_P3401146	-0.0581093	Compromised	0.0581093	Compromised	0	-0.0674005	Compromised	0.421856	Compromised	0.177228	0.553922	1.76	1.88	1.66	2.01	A_33_P3401146	Unknown
A_33_P3401179	-0.0501752	Compromised	0.0501752	Compromised	0	-0.0939512	Compromised	1.55192	Compromised	0.728986	0.469868	1.77	1.87	1.63	4.4	A_33_P3401179	Unknown
A_33_P3401394	0.317145	Detected	-0.317145	Detected	1.25e-07	0.31382	Detected	0.252702	Detected	0.283261	0.467783	18.9	12	17.9	14.8	A_33_P3401394	Unknown
A_33_P3401661	0.386827	Compromised	-0.386827	Compromised	0	-0.282056	Compromised	0.770033	Detected	0.243988	0.744546	8.24	4.75	4.92	8.8	A_33_P3401661	Unknown
A_33_P3402071	-0.110879	Detected	0.110879	Detected	0	-0.631547	Detected	0.184626	Detected	-0.223461	0.649984	20.1	23.1	13.3	20.2	A_33_P3402071	Unknown
A_33_P3402086	-0.236825	Compromised	0.236825	Detected	1.2e-07	-0.905292	Compromised	-1.24591	Compromised	-1.0756	0.0663173	7.3	9.99	4.36	2.97	A_33_P3402086	Unknown
A_33_P3402294	-0.568387	Detected	0.568387	Detected	0	-0.496339	Detected	-0.477487	Compromised	-0.486913	0.481945	9.46	20.5	9.44	8.25	A_33_P3402294	Unknown
A_33_P3402495	0.382767	Detected	-0.382767	Detected	0	0.922991	Detected	-0.850947	Detected	0.0360222	0.973642	27.6	16	38.1	9.61	A_33_P3402495	Unknown
A_33_P3402600	0.0549393	Detected	-0.0549388	Detected	2.385e-07	-0.291968	Detected	-0.386744	Detected	-0.339356	0.0427959	8990	8210	6710	5420	A_33_P3402600	Unknown
A_33_P3402773	-0.0709806	Detected	0.0709806	Detected	0	0.585717	Detected	0.864849	Detected	0.725283	0.0435827	28.6	31.1	42.8	44.8	A_33_P3402773	Unknown
A_33_P3403169	-0.0386844	Compromised	0.0386844	Compromised	0	-0.147029	Compromised	0.153198	Compromised	0.00308466	0.985931	2.01	2.09	1.77	1.88	A_33_P3403169	Unknown
A_33_P3403242	-0.0510669	Compromised	0.0510664	Compromised	-2.375e-07	-0.0886655	Compromised	0.20353	Compromised	0.0574322	0.74619	1.73	1.83	1.6	1.69	A_33_P3403242	Unknown
A_33_P3403356	-0.0228622	Detected	0.0228622	Detected	0	0.0144374	Detected	-0.371394	Detected	-0.178478	0.455223	1160	1180	1130	746	A_33_P3403356	Unknown
A_33_P3403957	-0.0513372	Compromised	0.0513377	Compromised	2.39e-07	-0.0790467	Compromised	0.198328	Compromised	0.0596404	0.725763	1.89	2	1.76	1.84	A_33_P3403957	Unknown
A_33_P3404047	-0.041714	Detected	0.041714	Detected	0	0.090194	Detected	0.0896852	Detected	0.0899396	0.163827	74.7	78	77.7	67	A_33_P3404047	Unknown
A_33_P3404116	-0.555832	Compromised	0.555832	Compromised	0	-1.32073	Compromised	0.266107	Compromised	-0.527314	0.640792	3.24	6.9	1.81	4.69	A_33_P3404116	Unknown
A_33_P3404221	-0.359384	Compromised	0.359384	Detected	0	0.233515	Detected	-0.211611	Compromised	0.0109518	0.981683	8.94	14.5	12.8	8.11	A_33_P3404221	Unknown
A_33_P3404241	-0.0409079	Compromised	0.0409074	Compromised	-2.385e-07	-0.112648	Compromised	0.216073	Compromised	0.0517125	0.788971	1.86	1.94	1.68	1.82	A_33_P3404241	Unknown
A_33_P3404346	-0.0139575	Compromised	0.0139575	Compromised	0	-0.153256	Compromised	0.167473	Compromised	0.00710845	0.968789	2.1	2.11	1.81	1.95	A_33_P3404346	Unknown
A_33_P3404566	0.292227	Detected	-0.292227	Compromised	0	0.395525	Detected	-0.440461	Compromised	-0.0224682	0.968864	15.2	9.99	15.5	7.49	A_33_P3404566	Unknown
A_33_P3404759	-0.438607	Compromised	0.438607	Compromised	1.2e-07	-0.606657	Compromised	0.753879	Detected	0.073611	0.935825	4.9	8.87	4.14	9.17	A_33_P3404759	Unknown
A_33_P3405043	-0.174766	Detected	0.174766	Detected	0	-0.0592506	Detected	-0.107448	Detected	-0.0833492	0.683143	17.6	22.1	18.1	15.1	A_33_P3405043	Unknown
A_33_P3405504	-0.995128	Compromised	0.995128	Detected	0	-1.41442	Compromised	-0.895369	Compromised	-1.1549	0.37814	7.1	27.8	5.04	6.23	A_33_P3405504	Unknown
A_33_P3405571	-0.0261283	Compromised	0.0261278	Compromised	-2.385e-07	-0.109175	Compromised	0.172782	Compromised	0.0318036	0.845047	1.83	1.87	1.64	1.72	A_33_P3405571	Unknown
A_33_P3405864	-0.0409079	Compromised	0.0409074	Compromised	-2.385e-07	-0.104086	Compromised	0.216073	Compromised	0.0559936	0.766961	1.86	1.94	1.69	1.82	A_33_P3405864	Unknown
A_33_P3405870	-0.0437441	Compromised	0.0437446	Compromised	2.385e-07	-0.136681	Compromised	0.167018	Compromised	0.0151687	0.932282	1.91	2	1.7	1.81	A_33_P3405870	Unknown
A_33_P3406090	-0.0163715	Detected	0.0163715	Detected	0	-0.434223	Detected	-0.297241	Detected	-0.365732	0.0351325	123	124	87.4	82.9	A_33_P3406090	Unknown
A_33_P3406110	-0.704396	Compromised	0.704396	Compromised	2.25e-07	0.231999	Compromised	-0.879997	Compromised	-0.323999	0.752636	2.4	6.28	4.36	1.74	A_33_P3406110	Unknown
A_33_P3406255	-0.0584104	Detected	0.0584104	Detected	0	-0.171918	Detected	0.0810716	Detected	-0.0454233	0.775366	204	218	179	184	A_33_P3406255	Unknown
A_33_P3406265	0.287048	Compromised	-0.287048	Compromised	0	1.10419	Compromised	0.258536	Compromised	0.681361	0.31403	2.84	1.88	4.75	2.28	A_33_P3406265	Unknown
A_33_P3406405	0.264853	Compromised	-0.264853	Compromised	-2.4e-07	0.229349	Compromised	-0.111098	Compromised	0.0591252	0.868364	2.71	1.85	2.51	1.71	A_33_P3406405	Unknown
A_33_P3406413	-0.283029	Compromised	0.283029	Compromised	0	-0.348588	Compromised	1.27752	Compromised	0.464466	0.643567	1.83	2.67	1.66	4.42	A_33_P3406413	Unknown
A_33_P3406547	-0.0465054	Compromised	0.0465054	Compromised	0	1.35707	Compromised	0.646594	Compromised	1.00183	0.107631	1.76	1.85	4.42	2.33	A_33_P3406547	Unknown
A_33_P3406702	-0.033433	Detected	0.0334325	Detected	-2.38e-07	-0.125931	Detected	0.0873127	Detected	-0.0193093	0.878713	15500	16000	13800	13800	A_33_P3406702	Unknown
A_33_P3406811	-0.0467873	Compromised	0.0467868	Compromised	-2.385e-07	-0.071753	Compromised	0.560509	Compromised	0.244378	0.524358	1.94	2.04	1.81	2.42	A_33_P3406811	Unknown
A_33_P3407049	-0.0152714	Detected	0.0152714	Detected	0	0.172622	Detected	-0.313475	Detected	-0.0704265	0.799656	45.5	45.8	49.2	30.3	A_33_P3407049	Unknown
A_33_P3407230	-0.184954	Detected	0.184954	Detected	0	0.171397	Detected	-0.339957	Detected	-0.08428	0.814426	22.3	28.4	27.1	16.4	A_33_P3407230	Unknown
A_33_P3407235	0.401616	Compromised	-0.401616	Compromised	0	-0.071774	Compromised	-1.24213	Compromised	-0.656954	0.452358	6.64	3.75	4.54	1.74	A_33_P3407235	Unknown
A_33_P3407374	0.0797548	Detected	-0.0797548	Detected	0	0.0406275	Detected	0.285933	Detected	0.16328	0.380507	57800	51000	53400	54600	A_33_P3407374	Unknown
A_33_P3407564	-0.033802	Detected	0.033802	Detected	0	-0.0628891	Detected	0.289591	Detected	0.113351	0.592186	244	252	227	250	A_33_P3407564	Unknown
A_33_P3407623	0.113246	Compromised	-0.113246	Compromised	-2.38e-07	-0.298277	Compromised	-0.0035038	Compromised	-0.150891	0.502158	2.41	2.03	1.72	1.82	A_33_P3407623	Unknown
A_33_P3407626	-0.0410686	Detected	0.0410686	Detected	0	0.0340328	Detected	0.158839	Detected	0.0964358	0.325828	18.5	19.3	18.5	17.4	A_33_P3407626	Unknown
A_33_P3407691	0.227259	Detected	-0.227259	Detected	0	0.461264	Detected	-0.160098	Detected	0.150583	0.733394	14.6	10.5	16.3	9.14	A_33_P3407691	Unknown
A_33_P3407826	0.0608566	Detected	-0.0608566	Detected	0	0.305396	Detected	-0.0469568	Detected	0.12922	0.559828	329	298	370	250	A_33_P3407826	Unknown
A_33_P3407941	-0.784709	Compromised	0.784709	Compromised	2.5e-07	-0.0541058	Compromised	-1.34436	Compromised	-0.699233	0.562367	3.06	8.95	4.82	1.7	A_33_P3407941	Unknown
A_33_P3407999	0.419481	Compromised	-0.419481	Compromised	0	0.396018	Compromised	-0.932631	Compromised	-0.268306	0.765272	5.3	2.92	4.95	1.7	A_33_P3407999	Unknown
A_33_P3408047	-1.29611	Compromised	1.29611	Detected	-2.5e-07	0.502706	Compromised	-1.01603	Compromised	-0.256662	0.880056	1.75	10.4	5.78	1.74	A_33_P3408047	Unknown
A_33_P3408162	-0.0510669	Compromised	0.0510664	Compromised	-2.375e-07	-0.0886655	Compromised	0.270256	Compromised	0.0907953	0.674632	1.73	1.83	1.6	1.77	A_33_P3408162	Unknown
A_33_P3408222	0.356357	Compromised	-0.356356	Compromised	2.4e-07	-0.489279	Compromised	0.16597	Compromised	-0.161654	0.770185	3.01	1.81	1.59	2.16	A_33_P3408222	Unknown
A_33_P3408227	0.126667	Compromised	-0.126666	Compromised	2.4e-07	-0.733692	Compromised	-0.416111	Compromised	-0.574901	0.105453	3.06	2.53	1.6	1.72	A_33_P3408227	Unknown
A_33_P3408529	0.163505	Compromised	-0.163505	Compromised	0	-2.08494	Compromised	-0.626333	Compromised	-1.35564	0.211384	8.91	7	1.78	4.22	A_33_P3408529	Unknown
A_33_P3408643	-0.689125	Compromised	0.689126	Compromised	2.4e-07	-0.813057	Compromised	-0.342481	Compromised	-0.577769	0.510703	1.94	4.97	1.69	2.02	A_33_P3408643	Unknown
A_33_P3408665	0.0035677	Detected	-0.00356722	Detected	2.384e-07	0.0313649	Detected	0.205614	Detected	0.11849	0.307146	4650	4560	4500	4380	A_33_P3408665	Unknown
A_33_P3408678	0.819385	Compromised	-0.819385	Compromised	0	-0.452368	Compromised	-0.742622	Compromised	-0.597495	0.547288	6.13	1.94	2.41	1.7	A_33_P3408678	Unknown
A_33_P3408683	-0.0696621	Compromised	0.0696626	Compromised	2.38e-07	-0.068943	Compromised	0.189389	Compromised	0.0602231	0.721323	1.99	2.16	1.89	1.95	A_33_P3408683	Unknown
A_33_P3408877	0.0353997	Detected	-0.0353997	Detected	0	-0.135769	Detected	0.259899	Detected	0.0620651	0.78666	92.4	86.7	77.9	88.4	A_33_P3408877	Unknown
A_33_P3409249	0.0425844	Detected	-0.0425844	Detected	0	-0.345647	Detected	0.224699	Detected	-0.0604739	0.8533	32.4	30.1	23.5	30.1	A_33_P3409249	Unknown
A_33_P3409282	-0.155284	Detected	0.155284	Detected	0	0.0504467	Detected	0.104492	Detected	0.0774696	0.671717	30.6	37.4	33.5	30	A_33_P3409282	Unknown
A_33_P3409289	0.0766671	Detected	-0.0766671	Detected	0	-0.128509	Detected	0.232975	Detected	0.0522327	0.81512	60.6	53.7	49.9	55.3	A_33_P3409289	Unknown
A_33_P3409544	-0.0575919	Compromised	0.0575914	Compromised	-2.375e-07	0.963841	Compromised	0.222626	Compromised	0.593233	0.254522	1.78	1.9	3.43	1.77	A_33_P3409544	Unknown
A_33_P3409631	-0.00882721	Compromised	0.00882721	Compromised	0	-0.1618	Compromised	-1.03901	Compromised	-0.600406	0.304572	4.24	4.23	3.62	1.7	A_33_P3409631	Unknown
A_33_P3409815	-0.0357506	Detected	0.0357506	Detected	0	-0.0729783	Detected	-0.238246	Detected	-0.155612	0.226069	53.4	55.3	49.4	38	A_33_P3409815	Unknown
A_33_P3410053	-0.0343137	Compromised	0.0343132	Compromised	-2.39e-07	-0.103178	Compromised	0.179607	Compromised	0.0382144	0.817401	1.79	1.85	1.62	1.7	A_33_P3410053	Unknown
A_33_P3410166	0.648945	Compromised	-0.648944	Compromised	2.25e-07	-0.8025	Compromised	-0.50584	Compromised	-0.65417	0.429363	4.84	1.94	1.68	1.78	A_33_P3410166	Unknown
A_33_P3410269	-0.0318527	Compromised	0.0318527	Compromised	0	-0.165979	Compromised	0.120431	Compromised	-0.0227742	0.890885	2	2.06	1.73	1.82	A_33_P3410269	Unknown
A_33_P3410821	-0.0591011	Compromised	0.0591016	Compromised	2.375e-07	-0.0728092	Compromised	0.192903	Compromised	0.0600467	0.719705	2.01	2.15	1.89	1.96	A_33_P3410821	Unknown
A_33_P3411122	0.194407	Detected	-0.194407	Compromised	1.15e-07	-0.826707	Compromised	-1.88648	Compromised	-1.35659	0.138127	9.3	7	4.35	1.8	A_33_P3411122	Unknown
A_33_P3411384	0.016355	Detected	-0.016355	Detected	0	-0.178633	Detected	-0.571724	Detected	-0.375179	0.197476	246	237	204	134	A_33_P3411384	Unknown
A_33_P3411890	-0.181425	Detected	0.181425	Detected	0	0.0124464	Detected	0.319074	Detected	0.16576	0.557488	30.3	38.4	32.9	35.1	A_33_P3411890	Unknown
A_33_P3412317	-0.621239	Compromised	0.621238	Compromised	-2.35e-07	-0.667324	Compromised	-0.45408	Compromised	-0.560702	0.467565	2.11	4.92	1.94	1.94	A_33_P3412317	Unknown
A_33_P3412438	0.066437	Detected	-0.066437	Detected	0	-0.666685	Detected	-0.590641	Detected	-0.628663	0.0145044	83	74.6	47.4	43.1	A_33_P3412438	Unknown
A_33_P3412687	0.087245	Detected	-0.087245	Detected	0	-0.400937	Detected	0.144706	Detected	-0.128115	0.698448	142	124	96.1	121	A_33_P3412687	Unknown
A_33_P3412695	0.0893397	Detected	-0.0893397	Detected	0	-0.348052	Detected	0.415085	Detected	0.0335164	0.939635	49.5	43.1	34.7	50.8	A_33_P3412695	Unknown
A_33_P3412795	-0.162227	Compromised	0.162227	Compromised	0	-0.182282	Compromised	0.0950918	Compromised	-0.0435953	0.857048	1.88	2.32	1.76	1.84	A_33_P3412795	Unknown
A_33_P3413104	0.174888	Detected	-0.174888	Detected	-1.15e-07	-1.97433	Compromised	-0.450889	Compromised	-1.21261	0.260938	15	11.6	3.21	7.96	A_33_P3413104	Unknown
A_33_P3413384	0.168263	Detected	-0.168263	Detected	-1.2e-07	-0.229941	Detected	-0.194664	Compromised	-0.212302	0.336295	12.8	9.99	9.22	8.15	A_33_P3413384	Unknown
A_33_P3413514	0.154187	Detected	-0.154187	Detected	0	0.0767305	Detected	0.30103	Detected	0.18888	0.426259	28.9	23	26	26.2	A_33_P3413514	Unknown
A_33_P3413518	0.474394	Compromised	-0.474395	Compromised	-2.4e-07	0.291113	Compromised	-1.36654	Compromised	-0.537715	0.630098	8.05	4.11	6.73	1.84	A_33_P3413518	Unknown
A_33_P3413945	-0.00672388	Compromised	0.00672388	Compromised	0	0.648269	Compromised	0.162977	Compromised	0.405623	0.236675	1.9	1.89	2.84	1.75	A_33_P3413945	Unknown
A_33_P3413997	-0.298971	Detected	0.298971	Detected	0	-0.849704	Detected	-0.0935619	Detected	-0.471633	0.431016	17.9	26.7	11.6	16.9	A_33_P3413997	Unknown
A_33_P3414017	0.344396	Detected	-0.344396	Detected	0	-0.201089	Detected	-0.27415	Detected	-0.237619	0.563504	615	376	400	328	A_33_P3414017	Unknown
A_33_P3414228	-0.0768819	Detected	0.0768819	Detected	0	0.0999899	Detected	0.536264	Detected	0.318127	0.302786	30.1	33	32.3	37.7	A_33_P3414228	Unknown
A_33_P3414472	-0.535473	Compromised	0.535473	Detected	0	-0.101059	Detected	-1.73216	Compromised	-0.916612	0.446647	7.39	15.3	9.48	2.64	A_33_P3414472	Unknown
A_33_P3414494	0.0310969	Compromised	-0.0310974	Compromised	-2.385e-07	-0.200641	Compromised	0.109357	Compromised	-0.0456419	0.799976	2.14	2.02	1.73	1.85	A_33_P3414494	Unknown
A_33_P3415047	-0.0485048	Compromised	0.0485053	Compromised	2.38e-07	0.634766	Compromised	0.216253	Compromised	0.42551	0.186126	1.85	1.95	2.82	1.82	A_33_P3415047	Unknown
A_33_P3415166	-0.17677	Compromised	0.176769	Compromised	-2.35e-07	-1.31526	Compromised	0.346207	Compromised	-0.484529	0.6259	4.36	5.49	1.88	5.13	A_33_P3415166	Unknown
A_33_P3415617	-0.0524151	Detected	0.0524151	Detected	0	-0.224751	Detected	0.061096	Detected	-0.0818276	0.644713	184	195	155	163	A_33_P3415617	Unknown
A_33_P3415826	0.329402	Compromised	-0.329402	Compromised	0	-0.551374	Compromised	-0.253738	Compromised	-0.402556	0.38131	3.22	2.01	1.66	1.76	A_33_P3415826	Unknown
A_33_P3415992	0.0144897	Compromised	-0.0144897	Compromised	0	-0.528538	Compromised	0.377382	Compromised	-0.0755782	0.882888	2.64	2.55	1.72	2.78	A_33_P3415992	Unknown
A_33_P3416196	-0.240951	Compromised	0.240951	Compromised	1.2e-07	-0.430214	Compromised	-1.49176	Compromised	-0.960989	0.240997	6.51	8.96	5.42	2.24	A_33_P3416196	Unknown
A_33_P3416644	-1.10902	Compromised	1.10902	Detected	1e-07	0.219639	Compromised	-1.21693	Compromised	-0.498646	0.742168	2.29	10.5	5.46	1.74	A_33_P3416644	Unknown
A_33_P3416649	-0.0182872	Compromised	0.0182872	Compromised	0	1.2669	Compromised	0.21441	Compromised	0.740655	0.294808	1.85	1.87	4.28	1.78	A_33_P3416649	Unknown
A_33_P3416707	-0.101914	Detected	0.101914	Detected	0	-0.0903771	Detected	0.0833385	Detected	-0.00351929	0.981419	34.8	39.5	33.3	32.4	A_33_P3416707	Unknown
A_33_P3416807	-0.0286107	Compromised	0.0286102	Compromised	-2.38e-07	-0.174682	Compromised	0.121499	Compromised	-0.0265915	0.876294	1.97	2.02	1.69	1.79	A_33_P3416807	Unknown
A_33_P3417123	0.00340891	Detected	-0.00340891	Detected	0	0.0785103	Detected	0.123554	Detected	0.101032	0.0472563	209	205	209	186	A_33_P3417123	Unknown
A_33_P3417464	0.100915	Compromised	-0.100915	Compromised	-2.375e-07	-0.665411	Compromised	-0.923717	Compromised	-0.794564	0.0400152	4.82	4.13	2.69	1.94	A_33_P3417464	Unknown
A_33_P3417547	-0.286099	Detected	0.286099	Detected	0	-0.266039	Detected	0.256251	Detected	-0.00489425	0.991066	18.7	27.4	18	22.3	A_33_P3417547	Unknown
A_33_P3417553	-0.0473213	Compromised	0.0473208	Compromised	-2.385e-07	0.171371	Compromised	0.207077	Compromised	0.189224	0.0645964	1.72	1.81	1.9	1.68	A_33_P3417553	Unknown
A_33_P3418165	-0.0446167	Compromised	0.0446162	Compromised	-2.39e-07	-0.0740461	Compromised	0.22027	Compromised	0.0731118	0.68133	1.86	1.95	1.73	1.83	A_33_P3418165	Unknown
A_33_P3418321	0.168482	Detected	-0.168483	Compromised	-2.4e-07	-0.357396	Compromised	-0.559957	Compromised	-0.458677	0.14482	9.51	7.42	6.27	4.7	A_33_P3418321	Unknown
A_33_P3418380	0.208654	Compromised	-0.208654	Compromised	2.35e-07	0.0632911	Compromised	-0.0164714	Compromised	0.0234098	0.922313	3.74	2.76	3.21	2.62	A_33_P3418380	Unknown
A_33_P3418448	-0.000671387	Detected	0.000671387	Detected	0	-0.747689	Detected	-0.391705	Detected	-0.569697	0.0853099	22.1	21.8	12.5	13.8	A_33_P3418448	Unknown
A_33_P3418466	0.0385594	Detected	-0.0385594	Detected	0	-0.100844	Detected	-0.206778	Detected	-0.153811	0.14341	152	142	131	105	A_33_P3418466	Unknown
A_33_P3418496	-1.65977	Compromised	1.65977	Detected	0	-0.520196	Compromised	-0.027936	Compromised	-0.274066	0.885266	1.86	18.3	3.89	4.72	A_33_P3418496	Unknown
A_33_P3418571	-0.0461116	Compromised	0.0461111	Compromised	-2.385e-07	-0.0717044	Compromised	0.225932	Compromised	0.0771139	0.669658	1.78	1.87	1.66	1.76	A_33_P3418571	Unknown
A_33_P3419204	0.636089	Compromised	-0.636089	Compromised	2.25e-07	0.165344	Compromised	-0.361349	Compromised	-0.0980024	0.899847	4.73	1.93	3.24	1.94	A_33_P3419204	Unknown
A_33_P3419735	-0.0700085	Detected	0.0700085	Detected	0	-0.0267475	Detected	-0.0561588	Detected	-0.0414531	0.620847	73.3	79.6	71.7	60.6	A_33_P3419735	Unknown
A_33_P3419875	-0.982418	Compromised	0.982418	Compromised	1e-07	-1.35857	Compromised	-1.06604	Compromised	-1.21231	0.34663	2.42	9.31	1.77	1.87	A_33_P3419875	Unknown
A_33_P3420013	0.400873	Detected	-0.400873	Detected	-1.25e-07	0.186467	Detected	0.689218	Detected	0.437843	0.452475	17.6	9.95	14.4	17.6	A_33_P3420013	Unknown
A_33_P3420347	-0.038548	Compromised	0.0385475	Compromised	-2.385e-07	-0.154052	Compromised	0.298945	Compromised	0.0724463	0.782378	2.02	2.1	1.77	2.09	A_33_P3420347	Unknown
A_33_P3420695	0.041764	Detected	-0.041764	Detected	0	-0.00958324	Detected	0.22552	Detected	0.107968	0.478008	143	133	131	133	A_33_P3420695	Unknown
A_33_P3420810	-0.0668378	Compromised	0.0668378	Compromised	0	-0.991736	Compromised	-0.432961	Compromised	-0.712349	0.13134	7.76	8.39	3.88	4.93	A_33_P3420810	Unknown
A_33_P3421007	-0.00676394	Compromised	0.00676394	Compromised	0	-0.141586	Compromised	0.497519	Compromised	0.177966	0.633655	1.92	1.91	1.66	2.23	A_33_P3421007	Unknown
A_33_P3421144	-0.0597324	Compromised	0.0597324	Compromised	0	-0.0189829	Compromised	0.237074	Compromised	0.109046	0.520925	1.7	1.82	1.66	1.71	A_33_P3421144	Unknown
A_33_P3421438	0.00252104	Compromised	-0.00252104	Compromised	0	-1.12043	Compromised	-0.715116	Compromised	-0.917775	0.045467	7.25	7.12	3.16	3.61	A_33_P3421438	Unknown
A_33_P3421515	0.0941486	Detected	-0.0941482	Detected	2.38e-07	-0.158354	Detected	-0.304975	Detected	-0.231664	0.191707	9550	8260	7610	5930	A_33_P3421515	Unknown
A_33_P3421674	1.12586	Detected	-1.12586	Compromised	-1e-07	0.0631719	Compromised	1.31058	Compromised	0.686877	0.646939	10.1	2.09	4.59	9.4	A_33_P3421674	Unknown
A_33_P3421808	-0.0351043	Compromised	0.0351047	Compromised	2.375e-07	-0.167003	Compromised	0.126411	Compromised	-0.0202959	0.905289	2.02	2.09	1.75	1.85	A_33_P3421808	Unknown
A_33_P3422294	0.0710516	Detected	-0.0710521	Detected	-2.37e-07	-0.03581	Detected	0.233108	Detected	0.0986488	0.583082	3460	3090	3050	3170	A_33_P3422294	Unknown
A_33_P3422712	-0.0436475	Detected	0.0436475	Detected	0	-0.354824	Detected	0.32931	Detected	-0.0127573	0.97385	1490	1560	1140	1580	A_33_P3422712	Unknown
A_33_P3423017	-0.372768	Compromised	0.372768	Detected	0	0.0985935	Detected	0.892594	Detected	0.495594	0.458858	6.96	11.5	9.16	13.7	A_33_P3423017	Unknown
A_33_P3423202	-0.143436	Detected	0.143436	Detected	0	-0.102084	Detected	-0.676482	Detected	-0.389283	0.349073	17.3	20.8	16.9	9.79	A_33_P3423202	Unknown
A_33_P3423210	-0.0530891	Compromised	0.0530891	Compromised	0	-0.0684423	Compromised	0.219226	Compromised	0.075392	0.671579	1.81	1.92	1.7	1.79	A_33_P3423210	Unknown
A_33_P3423315	-0.122967	Compromised	0.122967	Compromised	0	-0.632829	Compromised	-0.318891	Compromised	-0.47586	0.139711	2.49	2.91	1.66	1.78	A_33_P3423315	Unknown
A_33_P3423565	-0.409336	Compromised	0.409336	Compromised	-2.5e-07	-0.502273	Compromised	-0.206567	Compromised	-0.35442	0.500989	1.91	3.32	1.7	1.8	A_33_P3423565	Unknown
A_33_P3423845	0.0910766	Detected	-0.0910766	Detected	0	-0.1245	Detected	0.451315	Detected	0.163408	0.642626	137	119	112	144	A_33_P3423845	Unknown
A_33_P3424108	0.29866	Detected	-0.29866	Compromised	0	0.155856	Detected	-0.0669992	Compromised	0.0444283	0.901922	10.7	6.97	9.2	6.8	A_33_P3424108	Unknown
A_33_P3424347	0.0544457	Detected	-0.0544457	Detected	0	0.171776	Detected	0.184425	Detected	0.178101	0.0830818	101	92.3	104	90.5	A_33_P3424347	Unknown
A_33_P3424826	-0.148767	Compromised	0.148767	Compromised	-2.35e-07	0.287832	Detected	-0.352034	Compromised	-0.0321007	0.9358	7.48	9.06	9.61	5.32	A_33_P3424826	Unknown
A_33_P3424856	-0.0320654	Compromised	0.0320649	Compromised	-2.375e-07	-0.168468	Compromised	0.126769	Compromised	-0.0208495	0.902868	1.98	2.04	1.71	1.81	A_33_P3424856	Unknown
A_33_P3438201	-0.191385	Detected	0.191385	Detected	0	0.0656569	Detected	-0.0413187	Detected	0.0121691	0.956739	18.6	23.9	21.1	16.9	A_33_P3438201	Unknown
A_33_P3444555	0.136067	Detected	-0.136067	Detected	0	0.0811083	Detected	0.0689323	Detected	0.0750203	0.637082	17.4	14.2	15.9	13.6	A_33_P3444555	Unknown
A_33_P3465440	0.237885	Compromised	-0.237885	Compromised	2.4e-07	-0.362815	Compromised	-0.0446014	Compromised	-0.203708	0.550419	2.54	1.8	1.59	1.71	A_33_P3465440	Unknown
A_33_P3479066	-0.312211	Detected	0.312211	Detected	1.2e-07	0.284951	Detected	0.799061	Detected	0.542006	0.312138	9.61	14.6	13.8	17	A_33_P3479066	Unknown
A_33_P3484775	-0.0505152	Compromised	0.0505147	Compromised	-2.385e-07	1.29941	Compromised	0.192267	Compromised	0.745838	0.311724	1.93	2.04	4.67	1.87	A_33_P3484775	Unknown
A_33_P3486059	-0.0311422	Compromised	0.0311422	Compromised	0	0.6992	Compromised	0.141145	Compromised	0.420173	0.273181	2.07	2.13	3.26	1.91	A_33_P3486059	Unknown
A_33_P3503279	-0.178391	Detected	0.178391	Detected	0	-0.541615	Detected	-1.02881	Detected	-0.785213	0.121494	22.9	28.9	16.9	10.4	A_33_P3503279	Unknown
A_33_P3509019	-0.1723	Compromised	0.1723	Compromised	0	-0.19731	Compromised	0.107963	Compromised	-0.0446739	0.86404	1.79	2.24	1.67	1.78	A_33_P3509019	Unknown
A_33_P3510508	0.440546	Compromised	-0.440546	Compromised	0	-0.562356	Compromised	-0.262697	Compromised	-0.412526	0.468862	3.42	1.83	1.62	1.72	A_33_P3510508	Unknown
A_33_P3519223	-0.0656221	Detected	0.0656221	Detected	0	-0.738982	Compromised	-0.656525	Compromised	-0.697753	0.0121127	12.6	13.6	7.5	6.85	A_33_P3519223	Unknown
A_33_P3521965	-0.0552483	Compromised	0.0552483	Compromised	0	-0.0576835	Compromised	0.233097	Compromised	0.0877068	0.629615	1.72	1.83	1.63	1.72	A_33_P3521965	Unknown
A_33_P3538688	-0.0575523	Compromised	0.0575523	Compromised	0	-0.0592079	Compromised	0.177495	Compromised	0.0591435	0.697144	1.93	2.06	1.83	1.86	A_33_P3538688	Unknown
A_33_P3615955	-0.895224	Compromised	0.895224	Detected	1.15e-07	-0.225822	Compromised	0.0150776	Compromised	-0.105372	0.917792	3.08	10.5	4.65	4.74	A_33_P3615955	Unknown
A_33_P3642217	-0.503353	Compromised	0.503353	Detected	1.3e-07	-0.591407	Compromised	-0.306404	Compromised	-0.448906	0.481253	5.05	10	4.51	4.74	A_33_P3642217	Unknown
A_33_P3673310	0.329265	Detected	-0.329265	Compromised	0	-0.480741	Compromised	-0.350475	Compromised	-0.415608	0.341255	15.2	9.49	8.23	7.77	A_33_P3673310	Unknown
A_33_P3673544	-0.03968	Compromised	0.03968	Compromised	0	-0.129863	Compromised	0.172315	Compromised	0.0212257	0.904361	1.94	2.02	1.73	1.84	A_33_P3673544	Unknown
A_33_P3701139	-0.0983946	Detected	0.0983946	Detected	0	0.0984957	Detected	0.378854	Detected	0.238675	0.298103	1930	2180	2100	2200	A_33_P3701139	Unknown
A_33_P3723827	-0.603417	Compromised	0.603418	Compromised	2.5e-07	-0.62424	Compromised	-0.30666	Compromised	-0.46545	0.533452	1.71	3.89	1.6	1.72	A_33_P3723827	Unknown
A_33_P3733123	-0.182508	Compromised	0.182508	Compromised	0	-0.52656	Compromised	-0.0434284	Compromised	-0.284994	0.445906	2.34	2.97	1.75	2.11	A_33_P3733123	Unknown
A_33_P3744376	-0.588206	Compromised	0.588206	Compromised	1.25e-07	-1.86713	Compromised	-1.57494	Compromised	-1.72104	0.104868	4.09	9.11	1.6	1.69	A_33_P3744376	Unknown
A_33_P3751193	-0.0317769	Compromised	0.0317769	Compromised	0	0.952304	Compromised	-0.857602	Compromised	0.0473511	0.963049	3.68	3.79	6.91	1.7	A_33_P3751193	Unknown
A_33_P3765291	1.5801	Detected	-1.5801	Compromised	2.5e-07	-1.70191	Compromised	-1.39389	Compromised	-1.5479	0.432393	16.6	1.83	1.62	1.73	A_33_P3765291	Unknown
A_33_P3806704	-0.0739093	Compromised	0.0739093	Compromised	0	-0.0512757	Compromised	0.192183	Compromised	0.0704536	0.669799	1.96	2.14	1.89	1.93	A_33_P3806704	Unknown
A_33_P3809328	-0.0429561	Detected	0.0429561	Detected	0	0.344089	Detected	-1.4642	Detected	-0.560055	0.599173	43.5	45.5	54	13.3	A_33_P3809328	Unknown
A_33_P3815935	-0.314796	Compromised	0.314796	Compromised	2.4e-07	0.0596533	Compromised	-1.12841	Compromised	-0.53438	0.510033	4.25	6.48	5.23	1.98	A_33_P3815935	Unknown
A_33_P3855484	0.2507	Compromised	-0.2507	Compromised	-2.4e-07	-1.50599	Compromised	0.492033	Compromised	-0.506978	0.671291	6.55	4.56	1.84	6.34	A_33_P3855484	Unknown
A1BG	-0.0662849	Detected	0.0662849	Detected	0	-0.098098	Detected	0.18289	Detected	0.0423961	0.810516	1120	1210	1040	1090	NM_130786	ref|Homo sapiens alpha-1-B glycoprotein (A1BG), mRNA [NM_130786]	alpha-1-B glycoprotein	ref|NM_130786|ens|ENST00000598345|ens|ENST00000595014|ens|ENST00000263100	GO:0008150|GO:0003674|GO:0072562|GO:0005576|GO:0005615|GO:0070062	GO:0003674=molecular_function	GO:0005615=extracellular space|GO:0070062=extracellular exosome|GO:0072562=blood microparticle|GO:0005576=extracellular region	GO:0008150=biological_process	THC2461029	ENST00000598345	Hs.529161	1
A1BG-AS1	0.00110435	Detected	-0.00110435	Detected	0	-0.0069356	Detected	0.0171523	Detected	0.00510836	0.713829	250	246	236	207	AK027222	gb|Homo sapiens cDNA: FLJ23569 fis, clone LNG11861. [AK027222]	A1BG antisense RNA 1	gb|AK027222|gb|BC006144|gb|BC040926|tc|NP1154677					NP1154677		Hs.709582	503538
A1CF	-0.255323	Detected	0.255323	Detected	0	-0.807326	Compromised	-1.58287	Compromised	-1.1951	0.123564	9.9	13.9	6.41	3.23	NM_138933	ref|Homo sapiens APOBEC1 complementation factor (A1CF), transcript variant 3, mRNA [NM_138933]	APOBEC1 complementation factor	ref|NM_138933|ref|NM_001198819|ref|NM_001198820|ref|NM_001198818	GO:0003725|GO:0005515|GO:0006397|GO:0030895|GO:0010467|GO:0003727|GO:0005783|GO:0016556|GO:0003723|GO:0016554|GO:0050821|GO:0005737|GO:0000166|GO:0005654	GO:0000166=nucleotide binding|GO:0005515=protein binding|GO:0003723=RNA binding|GO:0003725=double-stranded RNA binding|GO:0003727=single-stranded RNA binding	GO:0005783=endoplasmic reticulum|GO:0005654=nucleoplasm|GO:0005737=cytoplasm|GO:0030895=apolipoprotein B mRNA editing enzyme complex	GO:0006397=mRNA processing|GO:0010467=gene expression|GO:0050821=protein stabilization|GO:0016554=cytidine to uridine editing|GO:0016556=mRNA modification	NP220852	ENST00000373995	Hs.282795	29974
A25969	-0.0503144	Compromised	0.0503144	Compromised	0	-0.0752802	Compromised	0.207974	Compromised	0.0663469	0.702038	1.94	2.05	1.81	1.9	A25969	gb|H.sapiens mRNA for T-cell receptor IGR b 18 Vbeta 7. [A25969]		gb|A25969|gb|X58812|gb|X57616|gb|X57618
A2M	-0.0153837	Detected	0.0153837	Detected	0	0.136202	Detected	0.113209	Detected	0.124706	0.0229047	45.8215	46.1308	48.3162	41.0184	NM_000014	ref|Homo sapiens alpha-2-macroglobulin (A2M), mRNA [NM_000014]	alpha-2-macroglobulin	ref|NM_000014|ens|ENST00000318602|ens|ENST00000495709|ens|ENST00000495442	GO:0005515|GO:0007264|GO:0004867|GO:0072562|GO:0002020|GO:0019959|GO:0005829|GO:0019966|GO:0019838|GO:0022617|GO:0030198|GO:0031093|GO:0070062|GO:0001869|GO:0051056|GO:0043120|GO:0005102|GO:0030168|GO:0005576|GO:0010951|GO:0048863|GO:0007596|GO:0007597|GO:0002576|GO:0019899|GO:0048306	GO:0019959=interleukin-8 binding|GO:0019838=growth factor binding|GO:0002020=protease binding|GO:0019966=interleukin-1 binding|GO:0048306=calcium-dependent protein binding|GO:0005102=receptor binding|GO:0004867=serine-type endopeptidase inhibitor activity|GO:0005515=protein binding|GO:0043120=tumor necrosis factor binding|GO:0019899=enzyme binding	GO:0005576=extracellular region|GO:0070062=extracellular exosome|GO:0072562=blood microparticle|GO:0005829=cytosol|GO:0031093=platelet alpha granule lumen	GO:0007597=blood coagulation, intrinsic pathway|GO:0007596=blood coagulation|GO:0002576=platelet degranulation|GO:0048863=stem cell differentiation|GO:0001869=negative regulation of complement activation, lectin pathway|GO:0010951=negative regulation of endopeptidase activity|GO:0030168=platelet activation|GO:0007264=small GTPase mediated signal transduction|GO:0022617=extracellular matrix disass…	NP1159902	ENST00000318602	Hs.212838	2
A2M-AS1	0.0320783	Detected	-0.0320783	Detected	0	-0.0530958	Detected	-0.104831	Detected	-0.0789633	0.195403	95.2108	89.7497	85.1998	70.9042	NR_026971	ref|Homo sapiens A2M antisense RNA 1 (head to head) (A2M-AS1), long non-coding RNA [NR_026971]	A2M antisense RNA 1 (head to head)	ref|NR_026971|linc|lnc-KLRG1-1:1|gb|AK056852|gb|AK096375					THC2505447		Hs.592432	144571
A2ML1	-0.205988	Compromised	0.205988	Compromised	0	1.34452	Compromised	0.696466	Compromised	1.02049	0.117193	1.96	2.57	5.45	3	NM_144670	ref|Homo sapiens alpha-2-macroglobulin-like 1 (A2ML1), transcript variant 1, mRNA [NM_144670]	alpha-2-macroglobulin-like 1	ref|NM_144670|ref|NM_001282424|ens|ENST00000541459|ens|ENST00000537475	GO:0010951|GO:0004867|GO:0030414|GO:0005615|GO:0052548|GO:0070062	GO:0030414=peptidase inhibitor activity|GO:0004867=serine-type endopeptidase inhibitor activity	GO:0005615=extracellular space|GO:0070062=extracellular exosome	GO:0010951=negative regulation of endopeptidase activity|GO:0052548=regulation of endopeptidase activity	NP1162821	ENST00000541459	Hs.620532	144568
A2MP1	0.0719991	Detected	-0.0719988	Detected	1.175e-07	0.210666	Detected	0.0055511	Detected	0.108108	0.479207	11.1	9.9	11.6	8.68	NR_040112	ref|Homo sapiens alpha-2-macroglobulin pseudogene 1 (A2MP1), non-coding RNA [NR_040112]	alpha-2-macroglobulin pseudogene 1	ref|NR_040112|ens|ENST00000543404|linc|lnc-PZP-1:1|tc|THC2644733						ENST00000566278	Hs.569125	3
A3GALT2	-0.0431395	Compromised	0.0431395	Compromised	0	-0.0897832	Compromised	0.202895	Compromised	0.056556	0.746442	1.73	1.81	1.59	1.68	NM_001080438	ref|Homo sapiens alpha 1,3-galactosyltransferase 2 (A3GALT2), mRNA [NM_001080438]	alpha 1,3-galactosyltransferase 2	ref|NM_001080438|ens|ENST00000442999|tc|NP1250934					NP1250934	ENST00000442999		127550
A4GALT	0.101822	Detected	-0.101822	Detected	-2.38e-07	-0.108479	Detected	-0.140347	Detected	-0.124413	0.350763	3120	2670	2560	2160	NM_017436	ref|Homo sapiens alpha 1,4-galactosyltransferase (A4GALT), mRNA [NM_017436]	alpha 1,4-galactosyltransferase	ref|NM_017436|ens|ENST00000381278|ens|ENST00000401850|ens|ENST00000249005	GO:0007009|GO:0030173|GO:0050512|GO:0016020|GO:0001576|GO:0015643|GO:0006688|GO:0006486|GO:0008378|GO:0070062	GO:0015643=toxic substance binding|GO:0008378=galactosyltransferase activity|GO:0050512=lactosylceramide 4-alpha-galactosyltransferase activity	GO:0070062=extracellular exosome|GO:0030173=integral component of Golgi membrane|GO:0016020=membrane	GO:0001576=globoside biosynthetic process|GO:0007009=plasma membrane organization|GO:0006486=protein glycosylation|GO:0006688=glycosphingolipid biosynthetic process	THC2462020	ENST00000381278	Hs.105956	53947
A4GNT	-0.0418987	Compromised	0.0418987	Compromised	0	-0.101098	Compromised	0.189222	Compromised	0.0440619	0.798033	1.8	1.88	1.64	1.73	NM_016161	ref|Homo sapiens alpha-1,4-N-acetylglucosaminyltransferase (A4GNT), mRNA [NM_016161]	alpha-1,4-N-acetylglucosaminyltransferase	ref|NM_016161|ens|ENST00000236709|gb|BC119640|gb|BC119639	GO:0008375|GO:0009101|GO:0016020|GO:0006493|GO:0000139|GO:0005975|GO:0050680|GO:0016021	GO:0008375=acetylglucosaminyltransferase activity	GO:0016020=membrane|GO:0016021=integral component of membrane|GO:0000139=Golgi membrane	GO:0005975=carbohydrate metabolic process|GO:0009101=glycoprotein biosynthetic process|GO:0006493=protein O-linked glycosylation|GO:0050680=negative regulation of epithelial cell proliferation	THC2485728	ENST00000236709	Hs.278960	51146
AA06	-0.922889	Compromised	0.922889	Compromised	0	-0.966665	Compromised	-0.650938	Compromised	-0.808801	0.478729	1.77	6.27	1.63	1.75	NR_037584	ref|Homo sapiens uncharacterized LOC100506677 (AA06), non-coding RNA [NR_037584]	uncharacterized LOC100506677	ref|NR_037584|linc|lnc-MYO1D-3:1|gb|AF381172|gb|AF381173					THC2616013		Hs.652571	100506677
AA489744	-1.58936	Compromised	1.58936	Detected	0	-1.83134	Compromised	-1.54732	Compromised	-1.68933	0.400716	2.23	19.9	1.79	1.88	AA489744	gb|aa43c10.r1 Soares_NhHMPu_S1 Homo sapiens cDNA clone IMAGE:823698 5', mRNA sequence [AA489744]		gb|AA489744
AA496144	-0.593609	Compromised	0.593609	Compromised	0	-0.93129	Compromised	0.808649	Compromised	-0.0613203	0.958865	2.13	4.78	1.6	4.61	AA496144	gb|zv51g10.r1 Soares_testis_NHT Homo sapiens cDNA clone IMAGE:757218 5', mRNA sequence [AA496144]		gb|AA496144|tc|THC2667977
AA504818	0.000829458	Detected	-0.000829458	Detected	0	-0.251644	Detected	-0.0243247	Detected	-0.137984	0.348653	1280	1260	1020	1030	AA504818	gb|aa64c04.s1 NCI_CGAP_GCB1 Homo sapiens cDNA clone IMAGE:825702 3' similar to contains Alu repetitive element;contains element TAR1 repetitive element ;, mRNA sequence [AA504818]		gb|AA504818|tc|THC2630254|tc|THC2473967
AA593742	-0.487594	Compromised	0.487594	Detected	1.2e-07	-1.13378	Compromised	-0.389745	Compromised	-0.761761	0.340106	6.71	13	4.07	5.88	AA593742	gb|nl83g08.s1 NCI_CGAP_Br2 Homo sapiens cDNA clone IMAGE:1057310 3' similar to contains L1.t2 L1 repetitive element ;, mRNA sequence [AA593742]		gb|AA593742|tc|THC2723561
AA682772	-0.0421276	Compromised	0.0421276	Compromised	0	0.841354	Compromised	0.172595	Compromised	0.506974	0.27142	2.01	2.1	3.52	1.91	AA682772	gb|ah52h03.s1 Soares_testis_NHT Homo sapiens cDNA clone 1293173 3', mRNA sequence [AA682772]		gb|AA682772
AA778499	-0.0756588	Detected	0.0756588	Detected	0	-0.156353	Detected	0.166516	Detected	0.00508166	0.979849	127	139	114	123	AA778499	gb|af85e03.s1 Soares_testis_NHT Homo sapiens cDNA clone 1048828 3', mRNA sequence [AA778499]		gb|AA778499
AAAS	-0.0533955	Detected	0.0533955	Detected	0	-0.0799348	Detected	0.0687005	Detected	-0.00561714	0.956637	1470	1560	1370	1310	NM_015665	ref|Homo sapiens achalasia, adrenocortical insufficiency, alacrimia (AAAS), transcript variant 1, mRNA [NM_015665]	achalasia, adrenocortical insufficiency, alacrimia	ref|NM_015665|ref|NM_001173466|ens|ENST00000552876|ens|ENST00000209873	GO:0007077|GO:0010467|GO:0019221|GO:0019058|GO:0005634|GO:0044281|GO:0005635|GO:0015031|GO:0008645|GO:0003674|GO:0005737|GO:0015758|GO:0005643|GO:0016032|GO:0007612|GO:0046822|GO:0005813|GO:0031965|GO:0005975|GO:0019083|GO:0055085|GO:0010827|GO:0006913|GO:0009566|GO:0016020|GO:0009405|GO:0005654|GO:0051028|GO:0000278	GO:0003674=molecular_function	GO:0005654=nucleoplasm|GO:0005643=nuclear pore|GO:0005635=nuclear envelope|GO:0005634=nucleus|GO:0005813=centrosome|GO:0031965=nuclear membrane|GO:0005737=cytoplasm|GO:0016020=membrane	GO:0007077=mitotic nuclear envelope disassembly|GO:0015031=protein transport|GO:0007612=learning|GO:0008645=hexose transport|GO:0000278=mitotic cell cycle|GO:0044281=small molecule metabolic process|GO:0019083=viral transcription|GO:0006913=nucleocytoplasmic transport|GO:0019221=cytokine-mediated signaling pathway|GO:0016032=viral process|GO:0051028=mRNA transport|GO:0055085=transmembrane transpo…	THC2533646	ENST00000552876	Hs.369144	8086
AACS	-0.034157	Detected	0.034157	Detected	0	0.130172	Detected	0.0592439	Detected	0.094708	0.194329	567.327	586.216	603.523	495.621	NM_023928	ref|Homo sapiens acetoacetyl-CoA synthetase (AACS), mRNA [NM_023928]	acetoacetyl-CoA synthetase	ref|NM_023928|ens|ENST00000538851|ens|ENST00000536118|ens|ENST00000543665	GO:0007584|GO:0042493|GO:0045471|GO:0034201|GO:0005524|GO:0014074|GO:0047760|GO:0005829|GO:0001889|GO:0071397|GO:0042594|GO:0071394|GO:0050872|GO:0006631|GO:0032024|GO:0071333|GO:0060612|GO:0030729	GO:0005524=ATP binding|GO:0030729=acetoacetate-CoA ligase activity|GO:0047760=butyrate-CoA ligase activity	GO:0005829=cytosol	GO:0014074=response to purine-containing compound|GO:0042594=response to starvation|GO:0007584=response to nutrient|GO:0006631=fatty acid metabolic process|GO:0060612=adipose tissue development|GO:0071394=cellular response to testosterone stimulus|GO:0050872=white fat cell differentiation|GO:0045471=response to ethanol|GO:0071333=cellular response to glucose stimulus|GO:0042493=response to drug|G…	NP1467485	ENST00000316543	Hs.656073	65985
AACSP1	0.175746	Detected	-0.175746	Detected	0	-0.421267	Detected	-0.649728	Detected	-0.535497	0.125103	29	22.4	18.2	13.4	NR_024035	ref|Homo sapiens acetoacetyl-CoA synthetase pseudogene 1 (AACSP1), non-coding RNA [NR_024035]	acetoacetyl-CoA synthetase pseudogene 1	ref|NR_024035|ens|ENST00000521412|ens|ENST00000503486|linc|TCONS_l2_00023283					THC2631045	ENST00000521412	Hs.382790	729522
AADAC	-0.0354967	Compromised	0.0354962	Compromised	-2.375e-07	0.0395689	Compromised	0.431978	Compromised	0.235773	0.358547	2.0136	2.08451	2.01355	2.2798	NM_001086	ref|Homo sapiens arylacetamide deacetylase (AADAC), mRNA [NM_001086]	arylacetamide deacetylase	ref|NM_001086|ens|ENST00000232892|ref|XM_005247103|ref|XM_005247104	GO:0004806|GO:0008152|GO:0019213|GO:0005789|GO:0010898|GO:0017171|GO:0016021|GO:0003824|GO:0016298	GO:0017171=serine hydrolase activity|GO:0003824=catalytic activity|GO:0004806=triglyceride lipase activity|GO:0016298=lipase activity|GO:0019213=deacetylase activity	GO:0005789=endoplasmic reticulum membrane|GO:0016021=integral component of membrane	GO:0008152=metabolic process|GO:0010898=positive regulation of triglyceride catabolic process	THC2472269	ENST00000232892	Hs.506908	13
AADACL2	-0.0517616	Compromised	0.0517616	Compromised	0	-0.0731683	Compromised	0.245045	Compromised	0.0859385	0.658624	1.7	1.8	1.59	1.71	NM_207365	ref|Homo sapiens arylacetamide deacetylase-like 2 (AADACL2), mRNA [NM_207365]	arylacetamide deacetylase-like 2	ref|NM_207365|ens|ENST00000356517|ens|ENST00000570799|gb|BC065724	GO:0052689|GO:0008152|GO:0005576|GO:0016021	GO:0052689=carboxylic ester hydrolase activity	GO:0016021=integral component of membrane|GO:0005576=extracellular region	GO:0008152=metabolic process	THC2480355	ENST00000356517	Hs.144710	344752
AADACL2-AS1	-0.168787	Compromised	0.168786	Compromised	-2.4e-07	0.0287704	Compromised	0.555337	Compromised	0.292054	0.448964	5.87	7.31	6.39	7.94	NR_110203	ref|Homo sapiens AADACL2 antisense RNA 1 (AADACL2-AS1), transcript variant 2, long non-coding RNA [NR_110203]	AADACL2 antisense RNA 1	ref|NR_110203|ref|NR_110202|linc|lnc-IGSF10-2:1|linc|lnc-IGSF10-2:2					THC2645463		Hs.680207	101928142
AADACL3	-0.269764	Detected	0.269764	Detected	0	-0.35004	Detected	-0.305515	Detected	-0.327777	0.349595	33.3	47.7	29.9	26.6	NM_001103170	ref|Homo sapiens arylacetamide deacetylase-like 3 (AADACL3), transcript variant 1, mRNA [NM_001103170]	arylacetamide deacetylase-like 3	ref|NM_001103170|ref|NR_111984|ens|ENST00000620146|gb|AK127828	GO:0016787|GO:0008152	GO:0016787=hydrolase activity		GO:0008152=metabolic process	THC2604262	ENST00000359318	Hs.464705	126767
AADACL4	0.168767	Compromised	-0.168768	Compromised	-2.4e-07	-0.289124	Compromised	-0.0205364	Compromised	-0.15483	0.547364	2.59	2.02	1.79	1.86	NM_001013630	ref|Homo sapiens arylacetamide deacetylase-like 4 (AADACL4), mRNA [NM_001013630]	arylacetamide deacetylase-like 4	ref|NM_001013630|ens|ENST00000376221|ref|XM_006710608|tc|THC2661558	GO:0052689|GO:0008152|GO:0016021	GO:0052689=carboxylic ester hydrolase activity	GO:0016021=integral component of membrane	GO:0008152=metabolic process	THC2661558	ENST00000376221	Hs.209954	343066
AADACP1	-0.210574	Detected	0.210574	Detected	0	-0.477998	Detected	0.107215	Detected	-0.185391	0.658255	19.4	25.6	15.3	19.8	NR_026915	ref|Homo sapiens arylacetamide deacetylase pseudogene 1 (AADACP1), non-coding RNA [NR_026915]	arylacetamide deacetylase pseudogene 1	ref|NR_026915|ens|ENST00000483636|linc|lnc-AADACL2-1:2|linc|TCONS_l2_00018935					THC2608394	ENST00000483636	Hs.383050	201651
AADAT	0.0487912	Detected	-0.0487912	Detected	0	-0.0189993	Detected	-0.125066	Detected	-0.0720325	0.422813	456	420	413	331	NM_016228	ref|Homo sapiens aminoadipate aminotransferase (AADAT), transcript variant 1, mRNA [NM_016228]	aminoadipate aminotransferase	ref|NM_016228|ref|NM_001286683|ref|NM_001286682|ref|NM_182662	GO:0070189|GO:0006569|GO:0006536|GO:0009058|GO:0033512|GO:0047536|GO:0044281|GO:0042803|GO:0034641|GO:0097052|GO:0019441|GO:0005759|GO:0006103|GO:0030170|GO:0016212|GO:0006554	GO:0030170=pyridoxal phosphate binding|GO:0042803=protein homodimerization activity|GO:0047536=2-aminoadipate transaminase activity|GO:0016212=kynurenine-oxoglutarate transaminase activity	GO:0005759=mitochondrial matrix	GO:0009058=biosynthetic process|GO:0097052=L-kynurenine metabolic process|GO:0006103=2-oxoglutarate metabolic process|GO:0006554=lysine catabolic process|GO:0044281=small molecule metabolic process|GO:0006569=tryptophan catabolic process|GO:0006536=glutamate metabolic process|GO:0070189=kynurenine metabolic process|GO:0019441=tryptophan catabolic process to kynurenine|GO:0034641=cellular nitrogen…	THC2488049	ENST00000353187	Hs.529735	51166
AAED1	-0.020345	Detected	0.020345	Detected	0	0.00958943	Detected	-0.166937	Detected	-0.0786738	0.476649	292	296	283	216	NM_153698	ref|Homo sapiens AhpC/TSA antioxidant enzyme domain containing 1 (AAED1), mRNA [NM_153698]	AhpC/TSA antioxidant enzyme domain containing 1	ref|NM_153698|ref|XM_005251783|ref|XM_005251784|gb|BC136503					THC2498207	ENST00000375234	Hs.44640	195827
AAGAB	-0.00388145	Detected	0.00388193	Detected	2.384e-07	-0.0763783	Detected	-0.106944	Detected	-0.0916612	0.0283408	10900	10800	9840	8310	NM_024666	ref|Homo sapiens alpha- and gamma-adaptin binding protein (AAGAB), transcript variant 1, mRNA [NM_024666]	alpha- and gamma-adaptin binding protein	ref|NM_024666|ref|NM_001271886|ref|NM_001271885|ens|ENST00000538028	GO:0005737|GO:0005654|GO:0015031|GO:0005829		GO:0005737=cytoplasm|GO:0005829=cytosol|GO:0005654=nucleoplasm	GO:0015031=protein transport	THC2601734	ENST00000538028	Hs.254642	79719
AAK1	-0.0564861	Detected	0.0564861	Detected	0	-0.100825	Detected	-0.346574	Detected	-0.2237	0.239922	137.886	146.957	126.931	92.3411	NM_014911	ref|Homo sapiens AP2 associated kinase 1 (AAK1), mRNA [NM_014911]	AP2 associated kinase 1	ref|NM_014911|ens|ENST00000409085|ens|ENST00000339092|tc|THC2684828	GO:0045747|GO:0005515|GO:0035612|GO:0030136|GO:0050821|GO:0005112|GO:0005524|GO:0006897|GO:0032880|GO:0005905|GO:0046777|GO:0004674|GO:0043195|GO:2000369|GO:0006468|GO:0031252|GO:0019897	GO:0005112=Notch binding|GO:0004674=protein serine/threonine kinase activity|GO:0005524=ATP binding|GO:0005515=protein binding|GO:0035612=AP-2 adaptor complex binding	GO:0031252=cell leading edge|GO:0043195=terminal bouton|GO:0005905=coated pit|GO:0030136=clathrin-coated vesicle|GO:0019897=extrinsic component of plasma membrane	GO:0032880=regulation of protein localization|GO:0046777=protein autophosphorylation|GO:0006897=endocytosis|GO:0006468=protein phosphorylation|GO:0045747=positive regulation of Notch signaling pathway|GO:0050821=protein stabilization|GO:2000369=regulation of clathrin-mediated endocytosis	THC2574997	ENST00000406297		22848
AAMDC	-0.0549355	Detected	0.054935	Detected	-2.375e-07	-0.0263762	Detected	0.114111	Detected	0.0438674	0.671461	2520	2680	2440	2320	NM_024684	ref|Homo sapiens adipogenesis associated, Mth938 domain containing (AAMDC), mRNA [NM_024684]	adipogenesis associated, Mth938 domain containing	ref|NM_024684|ens|ENST00000526415|ens|ENST00000393427|ens|ENST00000526164	GO:0043066|GO:0005737|GO:0045944|GO:0045600		GO:0005737=cytoplasm	GO:0043066=negative regulation of apoptotic process|GO:0045600=positive regulation of fat cell differentiation|GO:0045944=positive regulation of transcription from RNA polymerase II promoter	THC2473324	ENST00000526415	Hs.745040	28971
AAMP	-0.0198183	Detected	0.0198188	Detected	2.385e-07	0.0459037	Detected	0.141579	Detected	0.0937412	0.211948	4630	4690	4600	4240	NM_001087	ref|Homo sapiens angio-associated, migratory cell protein (AAMP), transcript variant 2, mRNA [NM_001087]	angio-associated, migratory cell protein	ref|NM_001087|ref|NM_001302545|ens|ENST00000489767|ens|ENST00000494720	GO:0010595|GO:0005737|GO:0009986|GO:0005886|GO:0014909|GO:0001525|GO:0008201|GO:0030154	GO:0008201=heparin binding	GO:0005737=cytoplasm|GO:0005886=plasma membrane|GO:0009986=cell surface	GO:0014909=smooth muscle cell migration|GO:0001525=angiogenesis|GO:0030154=cell differentiation|GO:0010595=positive regulation of endothelial cell migration	THC2561212	ENST00000489767	Hs.83347	14
AANAT	0.188579	Detected	-0.188579	Detected	0	-1.18312	Compromised	-0.680729	Compromised	-0.931924	0.0973037	19.9	15.1	7.3	8.92	NM_001166579	ref|Homo sapiens aralkylamine N-acetyltransferase (AANAT), transcript variant 1, mRNA [NM_001166579]	aralkylamine N-acetyltransferase	ref|NM_001166579|ref|NM_001088|ref|NR_110548|ens|ENST00000250615	GO:0051412|GO:0032868|GO:0048471|GO:0030187|GO:0044281|GO:0010043|GO:0005829|GO:0071889|GO:0051592|GO:0034641|GO:0046219|GO:0034695|GO:0004060|GO:0007623|GO:0009416|GO:0004059|GO:0071320|GO:0046688|GO:0034097|GO:0006474	GO:0004060=arylamine N-acetyltransferase activity|GO:0004059=aralkylamine N-acetyltransferase activity|GO:0071889=14-3-3 protein binding	GO:0048471=perinuclear region of cytoplasm|GO:0005829=cytosol	GO:0034097=response to cytokine|GO:0010043=response to zinc ion|GO:0034695=response to prostaglandin E|GO:0046688=response to copper ion|GO:0006474=N-terminal protein amino acid acetylation|GO:0046219=indolalkylamine biosynthetic process|GO:0007623=circadian rhythm|GO:0009416=response to light stimulus|GO:0044281=small molecule metabolic process|GO:0051412=response to corticosterone|GO:0032868=re…	THC2490308	ENST00000250615	Hs.431417	15
AAR2	0.0562613	Detected	-0.0562613	Detected	0	-0.00222135	Detected	0.110718	Detected	0.0542483	0.566377	1470	1340	1340	1250	NM_015511	ref|Homo sapiens AAR2 splicing factor homolog (S. cerevisiae) (AAR2), transcript variant 1, mRNA [NM_015511]	AAR2 splicing factor homolog (S. cerevisiae)	ref|NM_015511|ref|NM_001271874|ens|ENST00000373932|ens|ENST00000320849					THC2466790	ENST00000373932	Hs.11314	25980
AARD	0.153661	Detected	-0.153661	Compromised	0	-0.31932	Compromised	-0.369864	Compromised	-0.344592	0.157384	11.2	8.92	7.66	6.38	NM_001025357	ref|Homo sapiens alanine and arginine rich domain containing protein (AARD), mRNA [NM_001025357]	alanine and arginine rich domain containing protein	ref|NM_001025357|ens|ENST00000378279|gb|BC142621|tc|THC2533349	GO:0030324			GO:0030324=lung development	THC2533349	ENST00000378279	Hs.437551	441376
AARS	0.0181065	Detected	-0.0181069	Detected	-2.385e-07	0.388983	Detected	0.386271	Detected	0.387627	0.00218701	3340	3210	4100	3530	NM_001605	ref|Homo sapiens alanyl-tRNA synthetase (AARS), mRNA [NM_001605]	alanyl-tRNA synthetase	ref|NM_001605|ens|ENST00000569825|ens|ENST00000261772|gb|DQ891634	GO:0010467|GO:0002161|GO:0000049|GO:0006419|GO:0004813|GO:0005524|GO:0006400|GO:0008033|GO:0030968|GO:0005829|GO:0006418|GO:0043524|GO:0005737|GO:0016020|GO:0021680|GO:0006457|GO:0050885|GO:0008270|GO:0006450|GO:0043200|GO:0016597|GO:0001942|GO:0070062	GO:0008270=zinc ion binding|GO:0002161=aminoacyl-tRNA editing activity|GO:0000049=tRNA binding|GO:0005524=ATP binding|GO:0004813=alanine-tRNA ligase activity|GO:0016597=amino acid binding	GO:0070062=extracellular exosome|GO:0005737=cytoplasm|GO:0016020=membrane|GO:0005829=cytosol	GO:0008033=tRNA processing|GO:0006450=regulation of translational fidelity|GO:0043200=response to amino acid|GO:0006457=protein folding|GO:0006400=tRNA modification|GO:0043524=negative regulation of neuron apoptotic process|GO:0006418=tRNA aminoacylation for protein translation|GO:0021680=cerebellar Purkinje cell layer development|GO:0001942=hair follicle development|GO:0030968=endoplasmic reticu…	THC2576320	ENST00000569825	Hs.315137	16
AARS2	0.0363266	Detected	-0.0363266	Detected	0	-0.0116303	Detected	-0.260291	Detected	-0.135961	0.404006	1590	1490	1460	1060	NM_020745	ref|Homo sapiens alanyl-tRNA synthetase 2, mitochondrial (AARS2), mRNA [NM_020745]	alanyl-tRNA synthetase 2, mitochondrial	ref|NM_020745|ens|ENST00000244571|ref|XM_005249245|gb|AB033096	GO:0005739|GO:0010467|GO:0000049|GO:0033108|GO:0070143|GO:0004813|GO:0008270|GO:0005524|GO:0006418	GO:0005524=ATP binding|GO:0008270=zinc ion binding|GO:0004813=alanine-tRNA ligase activity|GO:0000049=tRNA binding	GO:0005739=mitochondrion	GO:0006418=tRNA aminoacylation for protein translation|GO:0070143=mitochondrial alanyl-tRNA aminoacylation|GO:0010467=gene expression|GO:0033108=mitochondrial respiratory chain complex assembly	THC2491596	ENST00000244571	Hs.158381	57505
AASDH	0.0908773	Detected	-0.0908773	Detected	0	-0.130552	Detected	-0.266112	Detected	-0.198332	0.222324	183	159	149	117	NM_181806	ref|Homo sapiens aminoadipate-semialdehyde dehydrogenase (AASDH), transcript variant 1, mRNA [NM_181806]	aminoadipate-semialdehyde dehydrogenase	ref|NM_181806|ref|NM_001286672|ref|NM_001286671|ref|NM_001286669	GO:0006631|GO:0016878|GO:0005524	GO:0005524=ATP binding|GO:0016878=acid-thiol ligase activity		GO:0006631=fatty acid metabolic process	THC2703687	ENST00000502617	Hs.104347	132949
AASDHPPT	0.0479469	Detected	-0.0479474	Detected	-2.385e-07	-0.142354	Detected	-0.254595	Detected	-0.198474	0.11495	2440	2250	2030	1620	NM_015423	ref|Homo sapiens aminoadipate-semialdehyde dehydrogenase-phosphopantetheinyl transferase (AASDHPPT), mRNA [NM_015423]	aminoadipate-semialdehyde dehydrogenase-phosphopantetheinyl transferase	ref|NM_015423|ens|ENST00000534152|ens|ENST00000278618|gb|AB072896	GO:0005515|GO:0000287|GO:0015939|GO:0009059|GO:0006766|GO:0006767|GO:0044281|GO:0008897|GO:0070062|GO:0005829	GO:0000287=magnesium ion binding|GO:0005515=protein binding|GO:0008897=holo-[acyl-carrier-protein] synthase activity	GO:0070062=extracellular exosome|GO:0005829=cytosol	GO:0044281=small molecule metabolic process|GO:0006767=water-soluble vitamin metabolic process|GO:0015939=pantothenate metabolic process|GO:0009059=macromolecule biosynthetic process|GO:0006766=vitamin metabolic process	THC2469513	ENST00000534152	Hs.524009	60496
AASS	-0.379727	Compromised	0.379728	Compromised	2.4e-07	-1.52821	Compromised	-1.23389	Compromised	-1.38105	0.0770402	4.04	6.74	1.73	1.83	NM_005763	ref|Homo sapiens aminoadipate-semialdehyde synthase (AASS), mRNA [NM_005763]	aminoadipate-semialdehyde synthase	ref|NM_005763|ens|ENST00000358954|ens|ENST00000431170|ens|ENST00000417368	GO:0005739|GO:0034641|GO:0051262|GO:0033512|GO:0005759|GO:0047130|GO:0047131|GO:0044281|GO:0006554|GO:0055114|GO:0043231	GO:0047131=saccharopine dehydrogenase (NAD+, L-glutamate-forming) activity|GO:0047130=saccharopine dehydrogenase (NADP+, L-lysine-forming) activity	GO:0005759=mitochondrial matrix|GO:0043231=intracellular membrane-bounded organelle|GO:0005739=mitochondrion	GO:0044281=small molecule metabolic process|GO:0051262=protein tetramerization|GO:0055114=oxidation-reduction process|GO:0034641=cellular nitrogen compound metabolic process|GO:0006554=lysine catabolic process|GO:0033512=L-lysine catabolic process to acetyl-CoA via saccharopine	THC2471460	ENST00000358954	Hs.156738	10157
AATBC	-0.170927	Detected	0.170927	Detected	0	-0.0666392	Detected	-0.145747	Detected	-0.106193	0.606524	17.9455	22.4143	18.3123	14.9533	NR_026961	ref|Homo sapiens uncharacterized LOC284837 (AATBC), long non-coding RNA [NR_026961]	uncharacterized LOC284837	ref|NR_026961|linc|lnc-CSTB-1:6|linc|lnc-CSTB-1:8|linc|lnc-CSTB-1:9							Hs.592159	284837
AATF	-0.058054	Detected	0.0580544	Detected	2.385e-07	0.145591	Detected	0.320489	Detected	0.23304	0.156575	2790	2980	3050	2970	NM_012138	ref|Homo sapiens apoptosis antagonizing transcription factor (AATF), mRNA [NM_012138]	apoptosis antagonizing transcription factor	ref|NM_012138|ens|ENST00000620004|ens|ENST00000619387|gb|AB385572	GO:0005515|GO:0048011|GO:0043066|GO:0005813|GO:0043065|GO:0003700|GO:0005794|GO:0042254|GO:0048156|GO:0005730|GO:0032929|GO:0005634|GO:0097190|GO:0042985|GO:0006974|GO:0043522|GO:0007346|GO:0005737|GO:0040016|GO:0045944|GO:2000378|GO:0007155|GO:0005925	GO:0043522=leucine zipper domain binding|GO:0003700=transcription factor activity, sequence-specific DNA binding|GO:0005515=protein binding|GO:0048156=tau protein binding	GO:0005794=Golgi apparatus|GO:0005730=nucleolus|GO:0005634=nucleus|GO:0005813=centrosome|GO:0005925=focal adhesion|GO:0005737=cytoplasm	GO:0040016=embryonic cleavage|GO:0042254=ribosome biogenesis|GO:0097190=apoptotic signaling pathway|GO:0007155=cell adhesion|GO:0006974=cellular response to DNA damage stimulus|GO:0045944=positive regulation of transcription from RNA polymerase II promoter|GO:0042985=negative regulation of amyloid precursor protein biosynthetic process|GO:0007346=regulation of mitotic cell cycle|GO:0048011=neurot…	THC2763179	ENST00000620004	Hs.195740	26574
AATK	0.0145743	Detected	-0.0145743	Detected	0	0.00478768	Detected	0.0233691	Detected	0.0140784	0.500897	163.753	158.152	154.396	134.907	NM_001080395	ref|Homo sapiens apoptosis-associated tyrosine kinase (AATK), transcript variant 1, mRNA [NM_001080395]	apoptosis-associated tyrosine kinase	ref|NM_001080395|ref|NM_004920|ens|ENST00000374792|ens|ENST00000570932	GO:0005515|GO:0048471|GO:0005783|GO:0044295|GO:0051402|GO:0005524|GO:0004674|GO:0007420|GO:0030517|GO:0004713|GO:0016021|GO:0032482|GO:0055037|GO:0038083	GO:0004674=protein serine/threonine kinase activity|GO:0005524=ATP binding|GO:0004713=protein tyrosine kinase activity|GO:0005515=protein binding	GO:0005783=endoplasmic reticulum|GO:0048471=perinuclear region of cytoplasm|GO:0044295=axonal growth cone|GO:0016021=integral component of membrane|GO:0055037=recycling endosome	GO:0032482=Rab protein signal transduction|GO:0038083=peptidyl-tyrosine autophosphorylation|GO:0007420=brain development|GO:0030517=negative regulation of axon extension|GO:0051402=neuron apoptotic process	THC2471583	ENST00000374792	Hs.514575	9625
AATK-AS1	0.238463	Compromised	-0.238463	Compromised	0	0.78493	Compromised	-0.633372	Compromised	0.075779	0.928563	3.93233	2.78446	5.45186	1.75955	NR_027255	ref|Homo sapiens AATK antisense RNA 1 (AATK-AS1), long non-coding RNA [NR_027255]	AATK antisense RNA 1	ref|NR_027255|linc|lnc-BAIAP2-2:2|linc|lnc-BAIAP2-2:1|gb|BC171777					THC2489764		Hs.591202	388428
AB020701	-0.00301647	Compromised	0.00301695	Compromised	2.384e-07	-0.136668	Compromised	0.160478	Compromised	0.011905	0.943444	1.93	1.91	1.67	1.77	AB020701	gb|Homo sapiens mRNA for KIAA0894 protein, partial cds. [AB020701]		gb|AB020701|tc|THC2492724|tc|THC2676699
AB051446	-0.0512953	Compromised	0.0512958	Compromised	2.385e-07	0.782416	Compromised	0.23705	Compromised	0.509733	0.207597	1.72	1.82	2.91	1.72	AB051446	gb|Homo sapiens mRNA for KIAA1659 protein, partial cds. [AB051446]		gb|AB051446|tc|THC2578064
AB072904	-0.23811	Compromised	0.23811	Compromised	0	-0.230271	Compromised	-0.143751	Compromised	-0.187011	0.520497	4.61	6.32	4.4	4.03	AB072904	gb|Homo sapiens mRNA for putative protein product of Nbla11895, complete cds. [AB072904]		gb|AB072904|tc|THC2489892
AB088847	-0.0435753	Compromised	0.0435753	Compromised	0	-0.135584	Compromised	0.159653	Compromised	0.0120347	0.944796	1.92	2.01	1.71	1.81	AB088847	gb|Homo sapiens BPA-1 mRNA for brain peptide A1, complete cds. [AB088847]		gb|AB088847
AB209400	0.033201	Detected	-0.033201	Detected	0	0.360689	Detected	-0.127844	Detected	0.116423	0.683244	340	320	405	249	AB209400	gb|Homo sapiens mRNA for basic FGF-repressed Zic binding protein isoform a variant protein. [AB209400]		gb|AB209400|tc|THC2718458|tc|THC2621953
AB306153	-0.561556	Compromised	0.561556	Compromised	2.4e-07	-0.441832	Compromised	0.0622501	Compromised	-0.189791	0.786975	1.91	4.1	1.97	2.41	AB306153	gb|Homo sapiens mRNA for T cell receptor beta variable 5, partial cds, clone: un 66. [AB306153]		gb|AB306153|gb|M97709|gb|A25490|gb|X58803
AB306238	-0.375976	Compromised	0.375977	Compromised	2.3e-07	-0.70384	Compromised	0.0890136	Compromised	-0.307413	0.630327	2.38	3.95	1.8	2.69	AB306238	gb|Homo sapiens mRNA for T cell receptor beta variable 6, partial cds, clone: un 226. [AB306238]		gb|AB306238|gb|AB305928|gb|AB305899|gb|AF397442
AB363267	-0.255028	Compromised	0.255028	Compromised	0	0.615133	Compromised	-1.18195	Compromised	-0.283408	0.790221	4.04	5.67	7.01	1.74	AB363267	gb|Homo sapiens IGK mRNA for immunoglobulin kappa light chain, partial cds, clone: F010-014L. [AB363267]		gb|AB363267|gb|AF103412|gb|DQ322856|gb|DQ322857
AB384543	-0.964957	Compromised	0.964957	Compromised	0	0.353415	Compromised	1.35793	Compromised	0.855675	0.51393	1.96	7.36	4.64	8.03	AB384543	gb|Synthetic construct DNA, clone: pF1KA0919, Homo sapiens EXOC6B gene for exocyst complex component Sec15B, complete cds, without stop codon, in Flexi system. [AB384543]		gb|AB384543|tc|THC2605866
AB385295	0.0478308	Detected	-0.0478308	Detected	0	-0.170317	Detected	-0.872576	Detected	-0.521447	0.279006	386	356	315	167	AB385295	gb|Synthetic construct DNA, clone: pF1KA0197, Homo sapiens NUP160 gene for nucleoporin 160kDa, complete cds, without stop codon, in Flexi system. [AB385295]		gb|AB385295|gb|D83781|tc|THC2495390
AB529256	0.130355	Detected	-0.130355	Detected	0	-0.619457	Detected	-0.287569	Detected	-0.453513	0.164638	18.6	15.3	10.5	11.4	AB529256	gb|Synthetic construct DNA, clone: pF1KE0827, Homo sapiens OR4A13P gene for Putative olfactory receptor, family 4, subfamily A, member 13, without stop codon, in Flexi system. [AB529256]		gb|AB529256|tc|NP511198
ABAT	-0.0229836	Detected	0.022984	Detected	2.385e-07	-0.0990882	Detected	-0.220783	Detected	-0.159936	0.133146	4020	4090	3620	2870	NM_000663	ref|Homo sapiens 4-aminobutyrate aminotransferase (ABAT), transcript variant 2, mRNA [NM_000663]	4-aminobutyrate aminotransferase	ref|NM_000663|ens|ENST00000568847|ens|ENST00000561870|ens|ENST00000566590	GO:0043005|GO:0001666|GO:0003867|GO:0045471|GO:0042493|GO:0048148|GO:0007268|GO:0045776|GO:0047298|GO:0042803|GO:0007269|GO:0005739|GO:0032145|GO:0032144|GO:0005759|GO:0010039|GO:0030170|GO:0009450|GO:0007626|GO:0042135|GO:0007620|GO:0070062|GO:0035094	GO:0030170=pyridoxal phosphate binding|GO:0042803=protein homodimerization activity|GO:0003867=4-aminobutyrate transaminase activity|GO:0047298=(S)-3-amino-2-methylpropionate transaminase activity|GO:0032145=succinate-semialdehyde dehydrogenase binding	GO:0043005=neuron projection|GO:0070062=extracellular exosome|GO:0005759=mitochondrial matrix|GO:0005739=mitochondrion|GO:0032144=4-aminobutyrate transaminase complex	GO:0009450=gamma-aminobutyric acid catabolic process|GO:0007268=synaptic transmission|GO:0045776=negative regulation of blood pressure|GO:0007620=copulation|GO:0042135=neurotransmitter catabolic process|GO:0035094=response to nicotine|GO:0007269=neurotransmitter secretion|GO:0045471=response to ethanol|GO:0001666=response to hypoxia|GO:0007626=locomotory behavior|GO:0048148=behavioral response to…	THC2608590	ENST00000396600	Hs.336768	18
ABCA1	-0.145896	Detected	0.145896	Detected	0	-0.0386927	Detected	1.10582	Detected	0.533566	0.461628	27.0788	32.6683	27.6881	52.8	NM_005502	ref|Homo sapiens ATP-binding cassette, sub-family A (ABC1), member 1 (ABCA1), mRNA [NM_005502]	ATP-binding cassette, sub-family A (ABC1), member 1	ref|NM_005502|ens|ENST00000374733|ens|ENST00000423487|ens|ENST00000374736	GO:0005515|GO:0008509|GO:0031267|GO:0071300|GO:0071397|GO:0034364|GO:0006497|GO:0051117|GO:0044255|GO:0019905|GO:0042632|GO:0033344|GO:0005794|GO:0010745|GO:0050702|GO:0043691|GO:0005548|GO:0038027|GO:0055098|GO:0007186|GO:0005887|GO:0042157|GO:0055091|GO:0045121|GO:0007040|GO:0009897|GO:0032367|GO:0048471|GO:0005886|GO:0017127|GO:0030819|GO:0030139|GO:0044281|GO:0010875|GO:0045332|GO:0005543|GO:…	GO:0016887=ATPase activity|GO:0005548=phospholipid transporter activity|GO:0034185=apolipoprotein binding|GO:0015485=cholesterol binding|GO:0019905=syntaxin binding|GO:0034188=apolipoprotein A-I receptor activity|GO:0034186=apolipoprotein A-I binding|GO:0005515=protein binding|GO:0008509=anion transmembrane transporter activity|GO:0031267=small GTPase binding|GO:0005524=ATP binding|GO:0017127=cho…	GO:0005794=Golgi apparatus|GO:0045335=phagocytic vesicle|GO:0005886=plasma membrane|GO:0030139=endocytic vesicle|GO:0009897=external side of plasma membrane|GO:0005887=integral component of plasma membrane|GO:0034364=high-density lipoprotein particle|GO:0048471=perinuclear region of cytoplasm|GO:0045121=membrane raft	GO:0055098=response to low-density lipoprotein particle|GO:0055091=phospholipid homeostasis|GO:0044281=small molecule metabolic process|GO:0006911=phagocytosis, engulfment|GO:0045332=phospholipid translocation|GO:0032367=intracellular cholesterol transport|GO:0032489=regulation of Cdc42 protein signal transduction|GO:0060155=platelet dense granule organization|GO:0038027=apolipoprotein A-I-mediat…	THC2499682	ENST00000374736	Hs.659274	19
ABCA10	0.246317	Detected	-0.246316	Compromised	1.2e-07	0.222761	Detected	0.655571	Detected	0.439166	0.312352	9.38	6.57	8.76	10.2	NM_080282	ref|Homo sapiens ATP-binding cassette, sub-family A (ABC1), member 10 (ABCA10), mRNA [NM_080282]	ATP-binding cassette, sub-family A (ABC1), member 10	ref|NM_080282|ref|NR_002451|ens|ENST00000518929|ens|ENST00000523419	GO:0005215|GO:0008152|GO:0006810|GO:0016021|GO:0016887|GO:0005524	GO:0016887=ATPase activity|GO:0005524=ATP binding|GO:0005215=transporter activity	GO:0016021=integral component of membrane	GO:0008152=metabolic process|GO:0006810=transport	THC2508298	ENST00000518929	Hs.25377	10349
ABCA11P	0.0799422	Detected	-0.0799422	Detected	0	0.141902	Detected	-0.0269527	Detected	0.0574749	0.670038	77.2	68.1	76.5	58.7	NR_002451	ref|Homo sapiens ATP-binding cassette, sub-family A (ABC1), member 11, pseudogene (ABCA11P), non-coding RNA [NR_002451]	ATP-binding cassette, sub-family A (ABC1), member 11, pseudogene	ref|NR_002451|ens|ENST00000515578|ens|ENST00000507854|ens|ENST00000514396	GO:0005215|GO:0008152|GO:0006810|GO:0016021|GO:0016887|GO:0005524	GO:0016887=ATPase activity|GO:0005524=ATP binding|GO:0005215=transporter activity	GO:0016021=integral component of membrane	GO:0008152=metabolic process|GO:0006810=transport	THC2488382	ENST00000515578	Hs.745030	79963
ABCA12	-0.0526655	Detected	0.0526655	Detected	0	0.498535	Detected	0.169082	Detected	0.333808	0.193344	1330	1410	1850	1270	NM_173076	ref|Homo sapiens ATP-binding cassette, sub-family A (ABC1), member 12 (ABCA12), transcript variant 1, mRNA [NM_173076]	ATP-binding cassette, sub-family A (ABC1), member 12	ref|NM_173076|ref|NM_015657|ref|NR_103740|ens|ENST00000272895	GO:0005515|GO:0097209|GO:0005886|GO:0005743|GO:0031424|GO:0061436|GO:0010875|GO:0005829|GO:0045055|GO:0005737|GO:0034191|GO:2000010|GO:0043129|GO:0019725|GO:0035627|GO:0048286|GO:0005102|GO:0055088|GO:0005524|GO:0072659|GO:0033700|GO:0034040|GO:0008152|GO:0006869|GO:0016021|GO:0032940|GO:0005319	GO:0034191=apolipoprotein A-I receptor binding|GO:0005524=ATP binding|GO:0034040=lipid-transporting ATPase activity|GO:0005102=receptor binding|GO:0005515=protein binding|GO:0005319=lipid transporter activity	GO:0005829=cytosol|GO:0097209=epidermal lamellar body|GO:0005886=plasma membrane|GO:0005743=mitochondrial inner membrane|GO:0005737=cytoplasm|GO:0016021=integral component of membrane	GO:0061436=establishment of skin barrier|GO:0043129=surfactant homeostasis|GO:0048286=lung alveolus development|GO:0045055=regulated secretory pathway|GO:0010875=positive regulation of cholesterol efflux|GO:0032940=secretion by cell|GO:0019725=cellular homeostasis|GO:2000010=positive regulation of protein localization to cell surface|GO:0055088=lipid homeostasis|GO:0008152=metabolic process|GO:00…	THC2475173	ENST00000272895	Hs.134585	26154
ABCA13	2.3303	Detected	-2.3303	Compromised	0	-2.7214	Compromised	-2.38335	Compromised	-2.55237	0.388683	58	2.26	1.66	1.81	NM_152701	ref|Homo sapiens ATP-binding cassette, sub-family A (ABC1), member 13 (ABCA13), mRNA [NM_152701]	ATP-binding cassette, sub-family A (ABC1), member 13	ref|NM_152701|ens|ENST00000435803|gb|AK091270|gb|AX746886	GO:0005215|GO:0008152|GO:0006810|GO:0016021|GO:0016887|GO:0005524	GO:0016887=ATPase activity|GO:0005524=ATP binding|GO:0005215=transporter activity	GO:0016021=integral component of membrane	GO:0008152=metabolic process|GO:0006810=transport	THC2472189	ENST00000435803	Hs.226568	154664
ABCA17P	-0.0597324	Compromised	0.0597324	Compromised	0	-0.0811391	Compromised	0.237074	Compromised	0.0779676	0.691431	1.7	1.82	1.59	1.71	NR_003574	ref|Homo sapiens ATP-binding cassette, sub-family A (ABC1), member 17, pseudogene (ABCA17P), non-coding RNA [NR_003574]	ATP-binding cassette, sub-family A (ABC1), member 17, pseudogene	ref|NR_003574|ens|ENST00000494925|ens|ENST00000469908|gb|DQ266102					THC2731745	ENST00000494925	Hs.376281	650655
ABCA2	-0.171929	Detected	0.171929	Detected	0	0.131928	Detected	1.84636	Detected	0.989146	0.375305	37.0799	46.3778	43.4511	123	NM_001606	ref|Homo sapiens ATP-binding cassette, sub-family A (ABC1), member 2 (ABCA2), transcript variant 1, mRNA [NM_001606]	ATP-binding cassette, sub-family A (ABC1), member 2	ref|NM_001606|ref|NM_212533|ens|ENST00000464520|ens|ENST00000459850	GO:0042632|GO:0006629|GO:0005815|GO:0006357|GO:0042493|GO:0042626|GO:0048545|GO:0005765|GO:0055085|GO:0005524|GO:0005764|GO:0000166|GO:0016020|GO:0006810|GO:0016023|GO:0016021|GO:0032383|GO:0043190|GO:0016887|GO:0010008|GO:0005768	GO:0016887=ATPase activity|GO:0042626=ATPase activity, coupled to transmembrane movement of substances|GO:0000166=nucleotide binding|GO:0005524=ATP binding	GO:0005765=lysosomal membrane|GO:0005764=lysosome|GO:0005768=endosome|GO:0005815=microtubule organizing center|GO:0016020=membrane|GO:0016021=integral component of membrane|GO:0016023=cytoplasmic membrane-bounded vesicle|GO:0010008=endosome membrane|GO:0043190=ATP-binding cassette (ABC) transporter complex	GO:0055085=transmembrane transport|GO:0032383=regulation of intracellular cholesterol transport|GO:0048545=response to steroid hormone|GO:0042632=cholesterol homeostasis|GO:0006810=transport|GO:0006357=regulation of transcription from RNA polymerase II promoter|GO:0042493=response to drug|GO:0006629=lipid metabolic process	THC2617219	ENST00000464520	Hs.421202	20
ABCA3	-0.105443	Detected	0.105443	Detected	0	0.0213211	Detected	0.0491507	Detected	0.0352359	0.771912	1920	2190	1990	1750	NM_001089	ref|Homo sapiens ATP-binding cassette, sub-family A (ABC1), member 3 (ABCA3), mRNA [NM_001089]	ATP-binding cassette, sub-family A (ABC1), member 3	ref|NM_001089|ens|ENST00000301732|gb|BC140895|gb|BC146866	GO:0005215|GO:0097233|GO:0005886|GO:0097208|GO:0042493|GO:0042626|GO:0005524|GO:0005615|GO:0055085|GO:0016020|GO:0008152|GO:0006810|GO:0016021	GO:0042626=ATPase activity, coupled to transmembrane movement of substances|GO:0005215=transporter activity|GO:0005524=ATP binding	GO:0005886=plasma membrane|GO:0005615=extracellular space|GO:0097233=alveolar lamellar body membrane|GO:0016020=membrane|GO:0016021=integral component of membrane|GO:0097208=alveolar lamellar body	GO:0055085=transmembrane transport|GO:0008152=metabolic process|GO:0006810=transport|GO:0042493=response to drug	THC2462218	ENST00000301732	Hs.26630	21
ABCA4	0.816902	Compromised	-0.816902	Compromised	0	-1.50153	Compromised	-1.20535	Compromised	-1.35344	0.24462	8.88	2.82	1.69	1.79	NM_000350	ref|Homo sapiens ATP-binding cassette, sub-family A (ABC1), member 4 (ABCA4), mRNA [NM_000350]	ATP-binding cassette, sub-family A (ABC1), member 4	ref|NM_000350|ens|ENST00000370225|ens|ENST00000536513|gb|U88667	GO:0005215|GO:0006649|GO:0007603|GO:0042626|GO:0045494|GO:0055085|GO:0001523|GO:0005524|GO:0045332|GO:0016020|GO:0005887|GO:0004012|GO:0006810|GO:0007601	GO:0042626=ATPase activity, coupled to transmembrane movement of substances|GO:0004012=phospholipid-translocating ATPase activity|GO:0005215=transporter activity|GO:0005524=ATP binding	GO:0005887=integral component of plasma membrane|GO:0016020=membrane	GO:0055085=transmembrane transport|GO:0007601=visual perception|GO:0006810=transport|GO:0006649=phospholipid transfer to membrane|GO:0007603=phototransduction, visible light|GO:0001523=retinoid metabolic process|GO:0045332=phospholipid translocation|GO:0045494=photoreceptor cell maintenance	THC2464953	ENST00000370225	Hs.416707	24
ABCA5	-0.051959	Detected	0.051959	Detected	0	0.0857267	Detected	-0.498213	Detected	-0.206243	0.558709	203	215	212	122	NM_018672	ref|Homo sapiens ATP-binding cassette, sub-family A (ABC1), member 5 (ABCA5), transcript variant 1, mRNA [NM_018672]	ATP-binding cassette, sub-family A (ABC1), member 5	ref|NM_018672|ref|NM_172232|ens|ENST00000586601|ens|ENST00000586995	GO:0005215|GO:0033344|GO:0010745|GO:0005770|GO:0043691|GO:0005765|GO:0005524|GO:0005764|GO:0000139|GO:0008152|GO:0031902|GO:0034375|GO:0016021|GO:0016887	GO:0016887=ATPase activity|GO:0005215=transporter activity|GO:0005524=ATP binding	GO:0005770=late endosome|GO:0000139=Golgi membrane|GO:0005765=lysosomal membrane|GO:0005764=lysosome|GO:0031902=late endosome membrane|GO:0016021=integral component of membrane	GO:0034375=high-density lipoprotein particle remodeling|GO:0008152=metabolic process|GO:0043691=reverse cholesterol transport|GO:0033344=cholesterol efflux|GO:0010745=negative regulation of macrophage derived foam cell differentiation	NP710343	ENST00000586601	Hs.731824	23461
ABCA6	0.606095	Compromised	-0.606095	Compromised	2.3e-07	-0.623138	Compromised	0.600994	Compromised	-0.0110719	0.990911	4.89	2.08	1.98	3.99	NM_080284	ref|Homo sapiens ATP-binding cassette, sub-family A (ABC1), member 6 (ABCA6), mRNA [NM_080284]	ATP-binding cassette, sub-family A (ABC1), member 6	ref|NM_080284|ens|ENST00000284425|ref|XM_006721791|ref|XM_006721792	GO:0005215|GO:0008152|GO:0006810|GO:0016021|GO:0016887|GO:0005524	GO:0016887=ATPase activity|GO:0005524=ATP binding|GO:0005215=transporter activity	GO:0016021=integral component of membrane	GO:0008152=metabolic process|GO:0006810=transport	THC2470497	ENST00000284425	Hs.709514	23460
ABCA7	0.00883508	Detected	-0.00883508	Detected	0	0.0743511	Detected	-0.0464065	Detected	0.0139723	0.840174	151	147	150	119	NM_019112	ref|Homo sapiens ATP-binding cassette, sub-family A (ABC1), member 7 (ABCA7), mRNA [NM_019112]	ATP-binding cassette, sub-family A (ABC1), member 7	ref|NM_019112|ens|ENST00000263094|ens|ENST00000433129|ref|XM_006722616	GO:0006909|GO:0005215|GO:0017121|GO:0034504|GO:0005886|GO:1900223|GO:0010875|GO:0050766|GO:0005737|GO:0016324|GO:0034380|GO:0007613|GO:0070374|GO:0043190|GO:0016887|GO:0033344|GO:0005794|GO:0009986|GO:0001891|GO:0032587|GO:0032780|GO:0005548|GO:0032781|GO:0055085|GO:0038027|GO:0005524|GO:0042985|GO:0033700|GO:0018149|GO:0000139|GO:0016021|GO:0010008|GO:0034188	GO:0016887=ATPase activity|GO:0005215=transporter activity|GO:0005524=ATP binding|GO:0005548=phospholipid transporter activity|GO:0034188=apolipoprotein A-I receptor activity	GO:0005794=Golgi apparatus|GO:0000139=Golgi membrane|GO:0001891=phagocytic cup|GO:0032587=ruffle membrane|GO:0043190=ATP-binding cassette (ABC) transporter complex|GO:0005886=plasma membrane|GO:0009986=cell surface|GO:0005737=cytoplasm|GO:0016021=integral component of membrane|GO:0010008=endosome membrane|GO:0016324=apical plasma membrane	GO:0007613=memory|GO:0017121=phospholipid scrambling|GO:0010875=positive regulation of cholesterol efflux|GO:0034504=protein localization to nucleus|GO:0034380=high-density lipoprotein particle assembly|GO:0055085=transmembrane transport|GO:0038027=apolipoprotein A-I-mediated signaling pathway|GO:0032780=negative regulation of ATPase activity|GO:0032781=positive regulation of ATPase activity|GO:1…	THC2634543	ENST00000263094	Hs.134514	10347
ABCA8	-0.0527787	Compromised	0.0527787	Compromised	0	-0.0896363	Compromised	0.227323	Compromised	0.0688431	0.72021	1.73989	1.84483	1.60997	1.72997	NM_007168	ref|Homo sapiens ATP-binding cassette, sub-family A (ABC1), member 8 (ABCA8), transcript variant 2, mRNA [NM_007168]	ATP-binding cassette, sub-family A (ABC1), member 8	ref|NM_007168|ref|NM_001288986|ref|NM_001288985|ens|ENST00000615593	GO:0005886|GO:0008152|GO:0006810|GO:0005743|GO:0042626|GO:0016021|GO:0055085|GO:0005524	GO:0005524=ATP binding|GO:0042626=ATPase activity, coupled to transmembrane movement of substances	GO:0016021=integral component of membrane|GO:0005886=plasma membrane|GO:0005743=mitochondrial inner membrane	GO:0055085=transmembrane transport|GO:0008152=metabolic process|GO:0006810=transport	THC2463630	ENST00000430352	Hs.58351	10351
ABCA9	0.0338507	Detected	-0.0338502	Detected	2.385e-07	0.178493	Detected	-0.0712347	Detected	0.0536292	0.718714	4860	4570	5100	3700	NM_080283	ref|Homo sapiens ATP-binding cassette, sub-family A (ABC1), member 9 (ABCA9), mRNA [NM_080283]	ATP-binding cassette, sub-family A (ABC1), member 9	ref|NM_080283|ens|ENST00000340001|ref|XM_005256935|ref|XM_006721633	GO:0005739|GO:0005215|GO:0008152|GO:0006810|GO:0016021|GO:0016887|GO:0005524	GO:0016887=ATPase activity|GO:0005524=ATP binding|GO:0005215=transporter activity	GO:0005739=mitochondrion|GO:0016021=integral component of membrane	GO:0008152=metabolic process|GO:0006810=transport	NP590209	ENST00000340001	Hs.131686	10350
ABCA9-AS1	-0.0274248	Compromised	0.0274253	Compromised	2.39e-07	-0.197689	Compromised	0.139734	Compromised	-0.0289774	0.880974	2.11	2.16	1.78	1.94	NR_126414	ref|Homo sapiens ABCA9 antisense RNA 1 (ABCA9-AS1), long non-coding RNA [NR_126414]	ABCA9 antisense RNA 1	ref|NR_126414|linc|lnc-MAP2K6-3:1|gb|CB960713|tc|THC2717445					THC2717445		Hs.569827	104355297
ABCB1	-0.175864	Compromised	0.175864	Compromised	0	0.2814	Compromised	0.109174	Compromised	0.195287	0.423689	1.76819	2.22367	2.30447	1.76414	NM_000927	ref|Homo sapiens ATP-binding cassette, sub-family B (MDR/TAP), member 1 (ABCB1), mRNA [NM_000927]	ATP-binding cassette, sub-family B (MDR/TAP), member 1	ref|NM_000927|ens|ENST00000416177|ens|ENST00000543898|ens|ENST00000265724	GO:0005515|GO:0005215|GO:0005886|GO:0009986|GO:0042493|GO:0072089|GO:0042626|GO:0042908|GO:0044281|GO:0055085|GO:0005524|GO:0008559|GO:0016020|GO:0000086|GO:0006855|GO:0006810|GO:0016021|GO:0070062	GO:0042626=ATPase activity, coupled to transmembrane movement of substances|GO:0008559=xenobiotic-transporting ATPase activity|GO:0005215=transporter activity|GO:0005524=ATP binding|GO:0005515=protein binding	GO:0005886=plasma membrane|GO:0009986=cell surface|GO:0070062=extracellular exosome|GO:0016020=membrane|GO:0016021=integral component of membrane	GO:0055085=transmembrane transport|GO:0006810=transport|GO:0044281=small molecule metabolic process|GO:0006855=drug transmembrane transport|GO:0000086=G2/M transition of mitotic cell cycle|GO:0042493=response to drug|GO:0072089=stem cell proliferation|GO:0042908=xenobiotic transport	THC2464142	ENST00000475929	Hs.489033	5243
ABCB10	0.0932562	Detected	-0.0932562	Detected	0	-0.344968	Detected	-0.471412	Detected	-0.40819	0.068454	316.961	274.485	222.064	175.478	NM_012089	ref|Homo sapiens ATP-binding cassette, sub-family B (MDR/TAP), member 10 (ABCB10), mRNA [NM_012089]	ATP-binding cassette, sub-family B (MDR/TAP), member 10	ref|NM_012089|ens|ENST00000344517|ref|XM_006711754|ref|XM_006711755	GO:0005215|GO:0032592|GO:0008152|GO:0006810|GO:0005743|GO:0042626|GO:0055085|GO:0005524|GO:0042803	GO:0005524=ATP binding|GO:0042626=ATPase activity, coupled to transmembrane movement of substances|GO:0042803=protein homodimerization activity|GO:0005215=transporter activity	GO:0032592=integral component of mitochondrial membrane|GO:0005743=mitochondrial inner membrane	GO:0055085=transmembrane transport|GO:0008152=metabolic process|GO:0006810=transport	THC2463247	ENST00000344517	Hs.17614	23456
ABCB11	-0.0510669	Compromised	0.0510664	Compromised	-2.375e-07	-0.0886655	Compromised	0.237278	Compromised	0.0743065	0.705948	1.73	1.83	1.6	1.73	NM_003742	ref|Homo sapiens ATP-binding cassette, sub-family B (MDR/TAP), member 11 (ABCB11), mRNA [NM_003742]	ATP-binding cassette, sub-family B (MDR/TAP), member 11	ref|NM_003742|ens|ENST00000263817|ens|ENST00000618180|ref|XM_006712818	GO:0005215|GO:0005886|GO:0006699|GO:0045177|GO:0042626|GO:0015126|GO:0044281|GO:0055085|GO:0005524|GO:0046581|GO:0016020|GO:0005887|GO:0015721|GO:0008554|GO:0015722|GO:0006810|GO:0015432|GO:0035725|GO:0008206|GO:0016021|GO:0070062	GO:0015126=canalicular bile acid transmembrane transporter activity|GO:0042626=ATPase activity, coupled to transmembrane movement of substances|GO:0015432=bile acid-exporting ATPase activity|GO:0008554=sodium-exporting ATPase activity, phosphorylative mechanism|GO:0005215=transporter activity|GO:0005524=ATP binding	GO:0005886=plasma membrane|GO:0046581=intercellular canaliculus|GO:0005887=integral component of plasma membrane|GO:0070062=extracellular exosome|GO:0045177=apical part of cell|GO:0016020=membrane|GO:0016021=integral component of membrane	GO:0055085=transmembrane transport|GO:0006699=bile acid biosynthetic process|GO:0006810=transport|GO:0008206=bile acid metabolic process|GO:0044281=small molecule metabolic process|GO:0035725=sodium ion transmembrane transport|GO:0015722=canalicular bile acid transport|GO:0015721=bile acid and bile salt transport	THC2479770	ENST00000263817	Hs.658439	8647
ABCB4	0.0321648	Detected	-0.0321648	Detected	0	-0.14092	Detected	-0.258247	Detected	-0.199584	0.0963935	69.6	65.6	58.6	46.6	NM_018849	ref|Homo sapiens ATP-binding cassette, sub-family B (MDR/TAP), member 4 (ABCB4), transcript variant B, mRNA [NM_018849]	ATP-binding cassette, sub-family B (MDR/TAP), member 4	ref|NM_018849|ref|NM_000443|ref|NM_018850|ens|ENST00000265723	GO:0006629|GO:0005886|GO:0042493|GO:0042626|GO:0042908|GO:0044281|GO:0055085|GO:0005524|GO:0046581|GO:0008559|GO:0016020|GO:0005887|GO:0006855|GO:0006810|GO:0016021|GO:0044255|GO:0070062	GO:0042626=ATPase activity, coupled to transmembrane movement of substances|GO:0008559=xenobiotic-transporting ATPase activity|GO:0005524=ATP binding	GO:0005886=plasma membrane|GO:0046581=intercellular canaliculus|GO:0005887=integral component of plasma membrane|GO:0070062=extracellular exosome|GO:0016020=membrane|GO:0016021=integral component of membrane	GO:0055085=transmembrane transport|GO:0044255=cellular lipid metabolic process|GO:0006810=transport|GO:0044281=small molecule metabolic process|GO:0006855=drug transmembrane transport|GO:0042493=response to drug|GO:0006629=lipid metabolic process|GO:0042908=xenobiotic transport	THC2486286	ENST00000265723	Hs.654403	5244
ABCB5	-0.193695	Compromised	0.193695	Compromised	-2.4e-07	-0.497198	Compromised	-0.2069	Compromised	-0.352049	0.28304	2.13622	2.75374	1.64314	1.73329	NM_001163993	ref|Homo sapiens ATP-binding cassette, sub-family B (MDR/TAP), member 5 (ABCB5), transcript variant 4, mRNA [NM_001163993]	ATP-binding cassette, sub-family B (MDR/TAP), member 5	ref|NM_001163993|gb|BC110370|tc|THC2693924	GO:0002481|GO:0005886|GO:0015562|GO:0002485|GO:0042626|GO:0055085|GO:0002591|GO:0005524|GO:0030154|GO:0005887|GO:0008152|GO:0042391|GO:0002489|GO:0048058	GO:0042626=ATPase activity, coupled to transmembrane movement of substances|GO:0015562=efflux transmembrane transporter activity|GO:0005524=ATP binding	GO:0005886=plasma membrane|GO:0005887=integral component of plasma membrane	GO:0055085=transmembrane transport|GO:0008152=metabolic process|GO:0002481=antigen processing and presentation of exogenous protein antigen via MHC class Ib, TAP-dependent|GO:0002591=positive regulation of antigen processing and presentation of peptide antigen via MHC class I|GO:0002485=antigen processing and presentation of endogenous peptide antigen via MHC class I via ER pathway, TAP-dependent…	THC2481622	ENST00000258738	Hs.404102	340273
ABCB6	0.0433912	Detected	-0.0433907	Detected	2.39e-07	0.159001	Detected	0.270021	Detected	0.214511	0.0930665	5970	5540	6140	5720	NM_005689	ref|Homo sapiens ATP-binding cassette, sub-family B (MDR/TAP), member 6 (Langereis blood group) (ABCB6), mRNA [NM_005689]	ATP-binding cassette, sub-family B (MDR/TAP), member 6 (Langereis blood group)	ref|NM_005689|ens|ENST00000443805|ens|ENST00000446716|ens|ENST00000497882	GO:0015886|GO:0015439|GO:0005794|GO:0015562|GO:0005886|GO:0015232|GO:0005783|GO:0005741|GO:0005740|GO:0055085|GO:0005524|GO:0005739|GO:0006879|GO:0006779|GO:0007420|GO:0006810|GO:0043588|GO:0031307|GO:0043190|GO:0070062|GO:0020037|GO:0005768	GO:0015562=efflux transmembrane transporter activity|GO:0015232=heme transporter activity|GO:0020037=heme binding|GO:0005524=ATP binding|GO:0015439=heme-transporting ATPase activity	GO:0005794=Golgi apparatus|GO:0005783=endoplasmic reticulum|GO:0005741=mitochondrial outer membrane|GO:0005740=mitochondrial envelope|GO:0005886=plasma membrane|GO:0031307=integral component of mitochondrial outer membrane|GO:0070062=extracellular exosome|GO:0005768=endosome|GO:0005739=mitochondrion|GO:0043190=ATP-binding cassette (ABC) transporter complex	GO:0055085=transmembrane transport|GO:0007420=brain development|GO:0006810=transport|GO:0043588=skin development|GO:0006879=cellular iron ion homeostasis|GO:0006779=porphyrin-containing compound biosynthetic process|GO:0015886=heme transport	THC2610801	ENST00000443805	Hs.107911	10058
ABCB7	0.0654709	Detected	-0.0654709	Detected	0	-0.0238154	Detected	0.0863354	Detected	0.03126	0.749853	1300	1170	1160	1080	NM_004299	ref|Homo sapiens ATP-binding cassette, sub-family B (MDR/TAP), member 7 (ABCB7), transcript variant 1, mRNA [NM_004299]	ATP-binding cassette, sub-family B (MDR/TAP), member 7	ref|NM_004299|ref|NM_001271696|ref|NM_001271698|ref|NM_001271699	GO:0006879|GO:0005739|GO:0015886|GO:0015232|GO:0006810|GO:0005743|GO:0042626|GO:0044281|GO:0016021|GO:0055085|GO:0005524	GO:0005524=ATP binding|GO:0042626=ATPase activity, coupled to transmembrane movement of substances|GO:0015232=heme transporter activity	GO:0005739=mitochondrion|GO:0016021=integral component of membrane|GO:0005743=mitochondrial inner membrane	GO:0006879=cellular iron ion homeostasis|GO:0044281=small molecule metabolic process|GO:0055085=transmembrane transport|GO:0006810=transport|GO:0015886=heme transport	THC2632775	ENST00000490858	Hs.370480	22
ABCB8	0.0637233	Detected	-0.0637233	Detected	0	0.0537679	Detected	0.162483	Detected	0.108125	0.32582	117.326	105.85	110.609	102.879	NM_007188	ref|Homo sapiens ATP-binding cassette, sub-family B (MDR/TAP), member 8 (ABCB8), transcript variant 2, mRNA [NM_007188]	ATP-binding cassette, sub-family B (MDR/TAP), member 8	ref|NM_007188|ref|NM_001282291|ref|NM_001282292|ref|NM_001282293	GO:0005215|GO:0005730|GO:0005743|GO:0042626|GO:0005634|GO:0005740|GO:0055085|GO:0005524|GO:0005739|GO:0016020|GO:0008152|GO:0006810|GO:0016021|GO:0043190	GO:0042626=ATPase activity, coupled to transmembrane movement of substances|GO:0005215=transporter activity|GO:0005524=ATP binding	GO:0005730=nucleolus|GO:0005740=mitochondrial envelope|GO:0005743=mitochondrial inner membrane|GO:0005634=nucleus|GO:0005739=mitochondrion|GO:0016020=membrane|GO:0016021=integral component of membrane|GO:0043190=ATP-binding cassette (ABC) transporter complex	GO:0055085=transmembrane transport|GO:0008152=metabolic process|GO:0006810=transport	THC2481609	ENST00000482309	Hs.647118	11194
ABCB9	0.0279038	Detected	-0.0279038	Detected	0	0.056021	Detected	0.258071	Detected	0.157046	0.272754	73.791	69.9622	71.4266	70.8745	ENST00000537276	ens|ATP-binding cassette, sub-family B (MDR/TAP), member 9 [Source:HGNC Symbol;Acc:HGNC:50] [ENST00000537276]	ATP-binding cassette, sub-family B (MDR/TAP), member 9	ens|ENST00000537276|ens|ENST00000426173|gb|AK027624|gb|AL833963	GO:0005515|GO:0002474|GO:0005783|GO:0030176|GO:0005765|GO:0015031|GO:0055085|GO:0005524|GO:0005764|GO:0042803|GO:0015833|GO:0022891|GO:0008152|GO:0016021|GO:0015440|GO:0005769	GO:0042803=protein homodimerization activity|GO:0015440=peptide-transporting ATPase activity|GO:0005524=ATP binding|GO:0022891=substrate-specific transmembrane transporter activity|GO:0005515=protein binding	GO:0005783=endoplasmic reticulum|GO:0005765=lysosomal membrane|GO:0005764=lysosome|GO:0005769=early endosome|GO:0030176=integral component of endoplasmic reticulum membrane|GO:0016021=integral component of membrane	GO:0055085=transmembrane transport|GO:0015031=protein transport|GO:0008152=metabolic process|GO:0002474=antigen processing and presentation of peptide antigen via MHC class I|GO:0015833=peptide transport	NP1200007	ENST00000542678	Hs.511951	23457
ABCC1	-0.0223081	Detected	0.0223081	Detected	0	0.09184	Detected	0.308931	Detected	0.200386	0.212288	72.9	74.1	74.9	75.1	NM_004996	ref|Homo sapiens ATP-binding cassette, sub-family C (CFTR/MRP), member 1 (ABCC1), mRNA [NM_004996]	ATP-binding cassette, sub-family C (CFTR/MRP), member 1	ref|NM_004996|ens|ENST00000399410|ens|ENST00000621659|ens|ENST00000399408	GO:0019369|GO:0005215|GO:0009235|GO:0005886|GO:0042493|GO:0042626|GO:0006767|GO:0044281|GO:0055085|GO:0005524|GO:0006691|GO:0016020|GO:0005887|GO:0006766|GO:0006810|GO:0016887|GO:0070062	GO:0016887=ATPase activity|GO:0042626=ATPase activity, coupled to transmembrane movement of substances|GO:0005215=transporter activity|GO:0005524=ATP binding	GO:0005886=plasma membrane|GO:0005887=integral component of plasma membrane|GO:0070062=extracellular exosome|GO:0016020=membrane	GO:0055085=transmembrane transport|GO:0006691=leukotriene metabolic process|GO:0009235=cobalamin metabolic process|GO:0006766=vitamin metabolic process|GO:0006810=transport|GO:0044281=small molecule metabolic process|GO:0006767=water-soluble vitamin metabolic process|GO:0042493=response to drug|GO:0019369=arachidonic acid metabolic process	NP236150	ENST00000399410	Hs.391464	4363
ABCC10	0.0549059	Detected	-0.0549059	Detected	0	0.0168619	Detected	1.11033	Detected	0.563596	0.412891	50.0632	45.7217	46.287	85.1986	NM_033450	ref|Homo sapiens ATP-binding cassette, sub-family C (CFTR/MRP), member 10 (ABCC10), transcript variant MRP7A, mRNA [NM_033450]	ATP-binding cassette, sub-family C (CFTR/MRP), member 10	ref|NM_033450|ref|NM_001198934|ens|ENST00000372512|ens|ENST00000244533	GO:0005886|GO:0008152|GO:0042626|GO:0016021|GO:0005765|GO:0055085|GO:0005524	GO:0005524=ATP binding|GO:0042626=ATPase activity, coupled to transmembrane movement of substances	GO:0016021=integral component of membrane|GO:0005886=plasma membrane|GO:0005765=lysosomal membrane	GO:0055085=transmembrane transport|GO:0008152=metabolic process	THC2470630	ENST00000244533	Hs.55879	89845
ABCC11	0.181831	Detected	-0.181831	Detected	0	-0.462331	Detected	-0.553528	Detected	-0.50793	0.113489	67.5	51.7	41	33.2	NM_033151	ref|Homo sapiens ATP-binding cassette, sub-family C (CFTR/MRP), member 11 (ABCC11), transcript variant 2, mRNA [NM_033151]	ATP-binding cassette, sub-family C (CFTR/MRP), member 11	ref|NM_033151|ref|NM_032583|ref|NM_145186|ens|ENST00000394747	GO:0005886|GO:0005887|GO:0008152|GO:0015711|GO:0042626|GO:0015216|GO:0008514|GO:0015865|GO:0055085|GO:0005524|GO:0070062	GO:0005524=ATP binding|GO:0042626=ATPase activity, coupled to transmembrane movement of substances|GO:0008514=organic anion transmembrane transporter activity|GO:0015216=purine nucleotide transmembrane transporter activity	GO:0005887=integral component of plasma membrane|GO:0070062=extracellular exosome|GO:0005886=plasma membrane	GO:0055085=transmembrane transport|GO:0008152=metabolic process|GO:0015711=organic anion transport|GO:0015865=purine nucleotide transport	THC2477051	ENST00000394747	Hs.652267	85320
ABCC12	-0.0471139	Compromised	0.0471139	Compromised	0	-0.0847125	Compromised	0.215994	Compromised	0.0656409	0.717423	1.73	1.82	1.6	1.7	NM_033226	ref|Homo sapiens ATP-binding cassette, sub-family C (CFTR/MRP), member 12 (ABCC12), mRNA [NM_033226]	ATP-binding cassette, sub-family C (CFTR/MRP), member 12	ref|NM_033226|ens|ENST00000497206|ens|ENST00000532494|ens|ENST00000529504	GO:0005739|GO:0008152|GO:0042626|GO:0016021|GO:0055085|GO:0005524	GO:0005524=ATP binding|GO:0042626=ATPase activity, coupled to transmembrane movement of substances	GO:0005739=mitochondrion|GO:0016021=integral component of membrane	GO:0055085=transmembrane transport|GO:0008152=metabolic process	THC2610177	ENST00000497206	Hs.410111	94160
ABCC13	-0.0423546	Compromised	0.0423546	Compromised	0	-0.103085	Compromised	0.198415	Compromised	0.0476651	0.789576	1.91024	1.9964	1.73859	1.84827	NR_003087	ref|Homo sapiens ATP-binding cassette, sub-family C (CFTR/MRP), member 13, pseudogene (ABCC13), transcript variant A, non-coding RNA [NR_003087]	ATP-binding cassette, sub-family C (CFTR/MRP), member 13, pseudogene	ref|NR_003087|ens|ENST00000467409|gb|AY063514|tc|THC2479122	GO:0042626|GO:0016021|GO:0055085|GO:0005524	GO:0005524=ATP binding|GO:0042626=ATPase activity, coupled to transmembrane movement of substances	GO:0016021=integral component of membrane	GO:0055085=transmembrane transport	THC2479122	ENST00000467409	Hs.366575	150000
ABCC2	0.830428	Detected	-0.830428	Compromised	1.25e-07	0.375919	Detected	1.20897	Detected	0.792445	0.483525	12.4	3.86469	8.59	13.2	ENST00000370434	ens|ATP-binding cassette, sub-family C (CFTR/MRP), member 2 [Source:HGNC Symbol;Acc:HGNC:53] [ENST00000370434]	ATP-binding cassette, sub-family C (CFTR/MRP), member 2	ens|ENST00000370434|gb|U66683|tc|THC2720169	GO:0005515|GO:0046685|GO:0043627|GO:0005886|GO:0009408|GO:0009986|GO:0031427|GO:0019904|GO:0042626|GO:0070327|GO:0055085|GO:0005524|GO:0046581|GO:0016324|GO:0030644|GO:0015732|GO:0005887|GO:0006855|GO:0008152|GO:0006810|GO:0008514|GO:0006979	GO:0019904=protein domain specific binding|GO:0042626=ATPase activity, coupled to transmembrane movement of substances|GO:0008514=organic anion transmembrane transporter activity|GO:0005524=ATP binding|GO:0005515=protein binding	GO:0005886=plasma membrane|GO:0009986=cell surface|GO:0046581=intercellular canaliculus|GO:0005887=integral component of plasma membrane|GO:0016324=apical plasma membrane	GO:0043627=response to estrogen|GO:0055085=transmembrane transport|GO:0008152=metabolic process|GO:0006810=transport|GO:0006979=response to oxidative stress|GO:0009408=response to heat|GO:0006855=drug transmembrane transport|GO:0031427=response to methotrexate|GO:0046685=response to arsenic-containing substance|GO:0030644=cellular chloride ion homeostasis|GO:0070327=thyroid hormone transport|GO:0…	THC2472036	ENST00000370449	Hs.368243	1244
ABCC3	0.0196531	Detected	-0.0196531	Detected	0	-0.00822806	Detected	-0.296114	Detected	-0.152171	0.404817	544.25	521.946	506.754	358.049	NM_001144070	ref|Homo sapiens ATP-binding cassette, sub-family C (CFTR/MRP), member 3 (ABCC3), transcript variant 2, mRNA [NM_001144070]	ATP-binding cassette, sub-family C (CFTR/MRP), member 3	ref|NM_001144070|ens|ENST00000427699|gb|BC046126|gb|BC050370	GO:0016020|GO:0005886|GO:0005887|GO:0015721|GO:0006810|GO:0042626|GO:0008514|GO:0008206|GO:0044281|GO:0055085|GO:0005524	GO:0005524=ATP binding|GO:0042626=ATPase activity, coupled to transmembrane movement of substances|GO:0008514=organic anion transmembrane transporter activity	GO:0005887=integral component of plasma membrane|GO:0016020=membrane|GO:0005886=plasma membrane	GO:0044281=small molecule metabolic process|GO:0055085=transmembrane transport|GO:0006810=transport|GO:0008206=bile acid metabolic process|GO:0015721=bile acid and bile salt transport	THC2482842	ENST00000503337	Hs.463421	8714
ABCC4	-0.245029	Compromised	0.245029	Compromised	-2.35e-07	-0.118089	Compromised	0.63996	Compromised	0.260936	0.621587	3.28	4.54	3.4	4.96	NM_005845	ref|Homo sapiens ATP-binding cassette, sub-family C (CFTR/MRP), member 4 (ABCC4), transcript variant 1, mRNA [NM_005845]	ATP-binding cassette, sub-family C (CFTR/MRP), member 4	ref|NM_005845|ref|NM_001105515|ref|NM_001301830|ref|NM_001301829	GO:0014070|GO:0031088|GO:0005886|GO:0042493|GO:0042626|GO:0010243|GO:0030168|GO:0055085|GO:0048661|GO:0005524|GO:0008150|GO:0016323|GO:0016020|GO:0007596|GO:0002576|GO:0016021|GO:0055114|GO:0016404	GO:0016404=15-hydroxyprostaglandin dehydrogenase (NAD+) activity|GO:0042626=ATPase activity, coupled to transmembrane movement of substances|GO:0005524=ATP binding	GO:0005886=plasma membrane|GO:0016020=membrane|GO:0016021=integral component of membrane|GO:0031088=platelet dense granule membrane|GO:0016323=basolateral plasma membrane	GO:0008150=biological_process|GO:0055085=transmembrane transport|GO:0014070=response to organic cyclic compound|GO:0007596=blood coagulation|GO:0048661=positive regulation of smooth muscle cell proliferation|GO:0002576=platelet degranulation|GO:0042493=response to drug|GO:0055114=oxidation-reduction process|GO:0010243=response to organonitrogen compound|GO:0030168=platelet activation	NP650495	ENST00000376887	Hs.508423	10257
ABCC5	0.0334179	Detected	-0.0334179	Detected	0	0.0812366	Detected	-0.211371	Detected	-0.0650673	0.706883	615.102	578.745	603.579	425.067	NM_005688	ref|Homo sapiens ATP-binding cassette, sub-family C (CFTR/MRP), member 5 (ABCC5), transcript variant 1, mRNA [NM_005688]	ATP-binding cassette, sub-family C (CFTR/MRP), member 5	ref|NM_005688|ens|ENST00000437205|ens|ENST00000265586|ens|ENST00000334444	GO:0005886|GO:0005975|GO:0042626|GO:0044281|GO:0055085|GO:0005524|GO:0016020|GO:0005887|GO:0006810|GO:0009405|GO:0015711|GO:0030213|GO:0030212|GO:0008514|GO:0030203	GO:0042626=ATPase activity, coupled to transmembrane movement of substances|GO:0008514=organic anion transmembrane transporter activity|GO:0005524=ATP binding	GO:0005886=plasma membrane|GO:0005887=integral component of plasma membrane|GO:0016020=membrane	GO:0055085=transmembrane transport|GO:0006810=transport|GO:0009405=pathogenesis|GO:0044281=small molecule metabolic process|GO:0005975=carbohydrate metabolic process|GO:0030213=hyaluronan biosynthetic process|GO:0030212=hyaluronan metabolic process|GO:0015711=organic anion transport|GO:0030203=glycosaminoglycan metabolic process	NP086323	ENST00000437205	Hs.743953	10057
ABCC5-AS1	0.0399339	Detected	-0.0399339	Detected	0	-0.187527	Detected	-0.257659	Detected	-0.222593	0.0525493	148	138	120	98.6	NR_046570	ref|Homo sapiens ABCC5 antisense RNA 1 (ABCC5-AS1), long non-coding RNA [NR_046570]	ABCC5 antisense RNA 1	ref|NR_046570|linc|lnc-HTR3D-1:1|tc|THC2649410					THC2649410		Hs.570696	100873982
ABCC6	0.0349755	Detected	-0.0349755	Detected	0	1.00974	Detected	-0.00155878	Detected	0.504088	0.424757	82.9512	77.8798	154.756	66.2253	NM_001079528	ref|Homo sapiens ATP-binding cassette, sub-family C (CFTR/MRP), member 6 (ABCC6), transcript variant 2, mRNA [NM_001079528]	ATP-binding cassette, sub-family C (CFTR/MRP), member 6	ref|NM_001079528|ens|ENST00000565118|gb|BC050733|tc|THC2474680	GO:0005215|GO:0005886|GO:0006200|GO:0042493|GO:0042626|GO:0005634|GO:0055085|GO:0005524|GO:0016328|GO:0016323|GO:0016324|GO:0005789|GO:0006810|GO:0016021|GO:0007601	GO:0042626=ATPase activity, coupled to transmembrane movement of substances|GO:0005215=transporter activity|GO:0005524=ATP binding	GO:0016328=lateral plasma membrane|GO:0005886=plasma membrane|GO:0005789=endoplasmic reticulum membrane|GO:0005634=nucleus|GO:0016021=integral component of membrane|GO:0016323=basolateral plasma membrane|GO:0016324=apical plasma membrane	GO:0055085=transmembrane transport|GO:0007601=visual perception|GO:0006810=transport|GO:0042493=response to drug	THC2480873	ENST00000576204	Hs.442182	368
ABCC6P1	-0.00756526	Compromised	0.0075655	Compromised	1.192e-07	0.0132592	Detected	-0.976053	Compromised	-0.481397	0.433151	9.75	9.71	9.39	4.08	NR_003569	ref|Homo sapiens ATP-binding cassette, sub-family C, member 6 pseudogene 1 (functional) (ABCC6P1), non-coding RNA [NR_003569]	ATP-binding cassette, sub-family C, member 6 pseudogene 1 (functional)	ref|NR_003569|ens|ENST00000546162|gb|BC075833|tc|THC2606670					THC2606670	ENST00000546162	Hs.13188	653190
ABCC8	-0.134495	Detected	0.134495	Detected	0	-0.0669267	Detected	-0.261187	Detected	-0.164057	0.426951	38.4	45.6	38.2	28.8	NM_000352	ref|Homo sapiens ATP-binding cassette, sub-family C (CFTR/MRP), member 8 (ABCC8), transcript variant 2, mRNA [NM_000352]	ATP-binding cassette, sub-family C (CFTR/MRP), member 8	ref|NM_000352|ref|NM_001287174|ens|ENST00000525022|ens|ENST00000526168	GO:0015079|GO:0005886|GO:0005975|GO:0008281|GO:0007268|GO:0042626|GO:0044281|GO:0055085|GO:0005524|GO:0044325|GO:0007165|GO:0006112|GO:0050796|GO:0008076|GO:0006813|GO:0071805	GO:0008281=sulfonylurea receptor activity|GO:0042626=ATPase activity, coupled to transmembrane movement of substances|GO:0015079=potassium ion transmembrane transporter activity|GO:0044325=ion channel binding|GO:0005524=ATP binding	GO:0008076=voltage-gated potassium channel complex|GO:0005886=plasma membrane	GO:0055085=transmembrane transport|GO:0071805=potassium ion transmembrane transport|GO:0007165=signal transduction|GO:0006112=energy reserve metabolic process|GO:0007268=synaptic transmission|GO:0044281=small molecule metabolic process|GO:0006813=potassium ion transport|GO:0005975=carbohydrate metabolic process|GO:0050796=regulation of insulin secretion	THC2461348	ENST00000525022	Hs.54470	6833
ABCC9	-0.0524473	Compromised	0.0524473	Compromised	0	0.0978479	Compromised	0.207884	Compromised	0.152866	0.182002	1.7638	1.86933	1.85817	1.72988	NM_005691	ref|Homo sapiens ATP-binding cassette, sub-family C (CFTR/MRP), member 9 (ABCC9), transcript variant SUR2A, mRNA [NM_005691]	ATP-binding cassette, sub-family C (CFTR/MRP), member 9	ref|NM_005691|ref|NM_020297|ens|ENST00000621589|ens|ENST00000261201	GO:0005215|GO:0005886|GO:0008282|GO:0008281|GO:0042626|GO:0005267|GO:0007268|GO:0010107|GO:0015459|GO:0055085|GO:0030017|GO:0005524|GO:0044325|GO:0042383|GO:0007165|GO:0051607|GO:0008076|GO:0008152|GO:0006813	GO:0008281=sulfonylurea receptor activity|GO:0042626=ATPase activity, coupled to transmembrane movement of substances|GO:0005267=potassium channel activity|GO:0044325=ion channel binding|GO:0005215=transporter activity|GO:0005524=ATP binding|GO:0015459=potassium channel regulator activity	GO:0008282=ATP-sensitive potassium channel complex|GO:0008076=voltage-gated potassium channel complex|GO:0005886=plasma membrane|GO:0042383=sarcolemma|GO:0030017=sarcomere	GO:0055085=transmembrane transport|GO:0007165=signal transduction|GO:0008152=metabolic process|GO:0007268=synaptic transmission|GO:0006813=potassium ion transport|GO:0051607=defense response to virus|GO:0010107=potassium ion import	NP274082	ENST00000261201	Hs.732701	10060
ABCD1	0.060442	Detected	-0.060442	Detected	0	-0.182031	Detected	1.48466	Detected	0.651316	0.517272	36.0861	32.7047	28.9562	79.3	NM_000033	ref|Homo sapiens ATP-binding cassette, sub-family D (ALD), member 1 (ABCD1), mRNA [NM_000033]	ATP-binding cassette, sub-family D (ALD), member 1	ref|NM_000033|ens|ENST00000429313|ens|ENST00000218104|ens|ENST00000399687	GO:0005515|GO:0005215|GO:0048471|GO:0042626|GO:0044281|GO:0042803|GO:0005829|GO:0042802|GO:0015910|GO:0005739|GO:0005737|GO:0007031|GO:0015919|GO:0005779|GO:0016887|GO:0044255|GO:0005778|GO:0042760|GO:0005777|GO:0006635|GO:0005325|GO:0036109|GO:0055085|GO:0005524|GO:0043651|GO:0033559|GO:0016020|GO:0042758|GO:0033540|GO:0019899	GO:0016887=ATPase activity|GO:0005215=transporter activity|GO:0005524=ATP binding|GO:0042626=ATPase activity, coupled to transmembrane movement of substances|GO:0042802=identical protein binding|GO:0042803=protein homodimerization activity|GO:0005325=peroxisomal fatty-acyl-CoA transporter activity|GO:0005515=protein binding|GO:0019899=enzyme binding	GO:0005829=cytosol|GO:0005778=peroxisomal membrane|GO:0005777=peroxisome|GO:0048471=perinuclear region of cytoplasm|GO:0005779=integral component of peroxisomal membrane|GO:0005737=cytoplasm|GO:0005739=mitochondrion|GO:0016020=membrane	GO:0042758=long-chain fatty acid catabolic process|GO:0033540=fatty acid beta-oxidation using acyl-CoA oxidase|GO:0007031=peroxisome organization|GO:0044255=cellular lipid metabolic process|GO:0044281=small molecule metabolic process|GO:0006635=fatty acid beta-oxidation|GO:0036109=alpha-linolenic acid metabolic process|GO:0033559=unsaturated fatty acid metabolic process|GO:0055085=transmembrane t…	THC2462247	ENST00000218104	Hs.159546	215
ABCD2	-0.0637255	Compromised	0.063725	Compromised	-2.375e-07	-0.0564394	Compromised	0.187339	Compromised	0.0654497	0.68109	1.96	2.11	1.87	1.91	NM_005164	ref|Homo sapiens ATP-binding cassette, sub-family D (ALD), member 2 (ABCD2), mRNA [NM_005164]	ATP-binding cassette, sub-family D (ALD), member 2	ref|NM_005164|gb|AJ000327|tc|THC2476335	GO:0005515|GO:0000038|GO:0006635|GO:0042626|GO:0055085|GO:0005524|GO:0042803|GO:0043231|GO:0005829|GO:0005739|GO:0032000|GO:0016021|GO:0005778|GO:0042760|GO:0005777	GO:0042626=ATPase activity, coupled to transmembrane movement of substances|GO:0042803=protein homodimerization activity|GO:0005524=ATP binding|GO:0005515=protein binding	GO:0005778=peroxisomal membrane|GO:0005777=peroxisome|GO:0043231=intracellular membrane-bounded organelle|GO:0005739=mitochondrion|GO:0016021=integral component of membrane|GO:0005829=cytosol	GO:0055085=transmembrane transport|GO:0032000=positive regulation of fatty acid beta-oxidation|GO:0042760=very long-chain fatty acid catabolic process|GO:0000038=very long-chain fatty acid metabolic process|GO:0006635=fatty acid beta-oxidation	THC2476335	ENST00000308666	Hs.117852	225
ABCD3	-0.0404108	Detected	0.0404108	Detected	0	0.258882	Detected	0.389705	Detected	0.324294	0.0518774	102.497	106.832	119.729	113.08	NM_001122674	ref|Homo sapiens ATP-binding cassette, sub-family D (ALD), member 3 (ABCD3), transcript variant 2, mRNA [NM_001122674]	ATP-binding cassette, sub-family D (ALD), member 3	ref|NM_001122674|ens|ENST00000315713|gb|BC009712|tc|THC2486920	GO:0005515|GO:0006635|GO:0005782|GO:0005743|GO:0042626|GO:0055085|GO:0005524|GO:0042803|GO:0043231|GO:0005829|GO:0016020|GO:0007031|GO:0016021|GO:0016887|GO:0042760|GO:0005778|GO:0005777	GO:0016887=ATPase activity|GO:0042626=ATPase activity, coupled to transmembrane movement of substances|GO:0042803=protein homodimerization activity|GO:0005524=ATP binding|GO:0005515=protein binding	GO:0005782=peroxisomal matrix|GO:0005743=mitochondrial inner membrane|GO:0005778=peroxisomal membrane|GO:0005777=peroxisome|GO:0043231=intracellular membrane-bounded organelle|GO:0016020=membrane|GO:0016021=integral component of membrane|GO:0005829=cytosol	GO:0055085=transmembrane transport|GO:0007031=peroxisome organization|GO:0042760=very long-chain fatty acid catabolic process|GO:0006635=fatty acid beta-oxidation	THC2486920	ENST00000315713	Hs.700576	5825
ABCD4	-1.37723	Detected	1.37723	Detected	0	1.1361	Detected	0.962625	Detected	1.04936	0.526416	68.2685	454	370	283	AK125109	gb|Homo sapiens cDNA FLJ43119 fis, clone CTONG3003179. [AK125109]	ATP-binding cassette, sub-family D (ALD), member 4	gb|AK125109|tc|THC2523786	GO:0009235|GO:0006767|GO:0042626|GO:0044281|GO:0005765|GO:0005524|GO:0055085|GO:0006766|GO:0005789|GO:0016021|GO:0043190|GO:0005778|GO:0005777	GO:0042626=ATPase activity, coupled to transmembrane movement of substances|GO:0005524=ATP binding	GO:0005765=lysosomal membrane|GO:0005789=endoplasmic reticulum membrane|GO:0005778=peroxisomal membrane|GO:0005777=peroxisome|GO:0016021=integral component of membrane|GO:0043190=ATP-binding cassette (ABC) transporter complex	GO:0055085=transmembrane transport|GO:0009235=cobalamin metabolic process|GO:0006766=vitamin metabolic process|GO:0044281=small molecule metabolic process|GO:0006767=water-soluble vitamin metabolic process	THC2548714	ENST00000484380		5826
ABCE1	-0.0308664	Detected	0.0308664	Detected	0	0.0413539	Detected	-0.169314	Detected	-0.0639801	0.618933	943.864	970.852	941.981	702.154	NM_002940	ref|Homo sapiens ATP-binding cassette, sub-family E (OABP), member 1 (ABCE1), transcript variant 1, mRNA [NM_002940]	ATP-binding cassette, sub-family E (OABP), member 1	ref|NM_002940|ref|NM_001040876|ens|ENST00000296577|gb|BC016988	GO:0005739|GO:0005737|GO:0051536|GO:0016020|GO:0008428|GO:0016032|GO:0009615|GO:0043086|GO:0016887|GO:0005524|GO:0006401	GO:0016887=ATPase activity|GO:0005524=ATP binding|GO:0008428=ribonuclease inhibitor activity|GO:0051536=iron-sulfur cluster binding	GO:0005737=cytoplasm|GO:0005739=mitochondrion|GO:0016020=membrane	GO:0043086=negative regulation of catalytic activity|GO:0016032=viral process|GO:0009615=response to virus|GO:0006401=RNA catabolic process	THC2469886	ENST00000296577	Hs.12013	6059
ABCF1	-0.0429974	Detected	0.0429969	Detected	-2.385e-07	0.032104	Detected	0.110057	Detected	0.0710804	0.345324	3910	4090	3910	3560	NM_001025091	ref|Homo sapiens ATP-binding cassette, sub-family F (GCN20), member 1 (ABCF1), transcript variant 1, mRNA [NM_001025091]	ATP-binding cassette, sub-family F (GCN20), member 1	ref|NM_001025091|ref|NM_001090|ens|ENST00000376545|ens|ENST00000383588	GO:0005515|GO:0042254|GO:0045727|GO:0008494|GO:0005635|GO:0005524|GO:0006412|GO:0006413|GO:0005737|GO:0006954|GO:0016020|GO:0042788|GO:0043022|GO:0005840|GO:0005654|GO:0016887|GO:0008135	GO:0016887=ATPase activity|GO:0008494=translation activator activity|GO:0008135=translation factor activity, RNA binding|GO:0005524=ATP binding|GO:0005515=protein binding|GO:0043022=ribosome binding	GO:0005840=ribosome|GO:0042788=polysomal ribosome|GO:0005654=nucleoplasm|GO:0005635=nuclear envelope|GO:0005737=cytoplasm|GO:0016020=membrane	GO:0045727=positive regulation of translation|GO:0042254=ribosome biogenesis|GO:0006413=translational initiation|GO:0006412=translation|GO:0006954=inflammatory response	NP1176940	ENST00000376545	Hs.655285	23
ABCF2	-0.0570853	Detected	0.0570853	Detected	0	0.170019	Detected	0.334353	Detected	0.252186	0.12789	1350	1440	1500	1450	NM_005692	ref|Homo sapiens ATP-binding cassette, sub-family F (GCN20), member 2 (ABCF2), transcript variant 2, mRNA [NM_005692]	ATP-binding cassette, sub-family F (GCN20), member 2	ref|NM_005692|ens|ENST00000222388|ens|ENST00000465687|ref|XM_005249931	GO:0005215|GO:0016020|GO:0008152|GO:0006810|GO:0005740|GO:0043190|GO:0016887|GO:0005524	GO:0016887=ATPase activity|GO:0005524=ATP binding|GO:0005215=transporter activity	GO:0016020=membrane|GO:0005740=mitochondrial envelope|GO:0043190=ATP-binding cassette (ABC) transporter complex	GO:0008152=metabolic process|GO:0006810=transport	THC2619700	ENST00000222388	Hs.654958	10061
ABCF3	-0.0376759	Detected	0.0376754	Detected	-2.39e-07	0.0958085	Detected	0.259156	Detected	0.177482	0.187194	3390	3520	3530	3410	NM_018358	ref|Homo sapiens ATP-binding cassette, sub-family F (GCN20), member 3 (ABCF3), mRNA [NM_018358]	ATP-binding cassette, sub-family F (GCN20), member 3	ref|NM_018358|ens|ENST00000468892|ens|ENST00000292808|ens|ENST00000466742	GO:0051607|GO:0016020|GO:0008152|GO:0016887|GO:0005524	GO:0016887=ATPase activity|GO:0005524=ATP binding	GO:0016020=membrane	GO:0008152=metabolic process|GO:0051607=defense response to virus	THC2763523	ENST00000468892	Hs.361323	55324
ABCG1	-0.00323224	Detected	0.00323224	Detected	0	0.253579	Detected	0.0715692	Detected	0.162574	0.216135	596	590	676	514	NM_207627	ref|Homo sapiens ATP-binding cassette, sub-family G (WHITE), member 1 (ABCG1), transcript variant 5, mRNA [NM_207627]	ATP-binding cassette, sub-family G (WHITE), member 1	ref|NM_207627|ref|NM_207628|ref|NM_004915|ref|NM_207174	GO:0005515|GO:0019534|GO:0005886|GO:0033993|GO:0017127|GO:0010872|GO:0044281|GO:0042803|GO:0010875|GO:0043231|GO:0005739|GO:0005543|GO:0015485|GO:0046983|GO:0009720|GO:0008203|GO:0042987|GO:0042632|GO:0033344|GO:0006355|GO:0005794|GO:0010033|GO:0046982|GO:0010745|GO:0043691|GO:0005548|GO:0055085|GO:0005524|GO:0010887|GO:0055099|GO:0033700|GO:0043531|GO:0034374|GO:0000139|GO:0005887|GO:0034041|GO:…	GO:0005524=ATP binding|GO:0005548=phospholipid transporter activity|GO:0046982=protein heterodimerization activity|GO:0017127=cholesterol transporter activity|GO:0034041=sterol-transporting ATPase activity|GO:0042803=protein homodimerization activity|GO:0015485=cholesterol binding|GO:0046983=protein dimerization activity|GO:0043531=ADP binding|GO:0005543=phospholipid binding|GO:0005515=protein bi…	GO:0009897=external side of plasma membrane|GO:0005794=Golgi apparatus|GO:0000139=Golgi membrane|GO:0005654=nucleoplasm|GO:0005789=endoplasmic reticulum membrane|GO:0005887=integral component of plasma membrane|GO:0005768=endosome|GO:0043231=intracellular membrane-bounded organelle|GO:0005886=plasma membrane|GO:0005739=mitochondrion|GO:0055037=recycling endosome	GO:0034375=high-density lipoprotein particle remodeling|GO:0055099=response to high density lipoprotein particle|GO:0034374=low-density lipoprotein particle remodeling|GO:0008203=cholesterol metabolic process|GO:0045542=positive regulation of cholesterol biosynthetic process|GO:0042157=lipoprotein metabolic process|GO:0042632=cholesterol homeostasis|GO:0055091=phospholipid homeostasis|GO:0044281=…	THC2463214	ENST00000398437	Hs.124649	9619
ABCG2	0.51816	Compromised	-0.51816	Compromised	0	0.458297	Compromised	-1.30474	Compromised	-0.423223	0.719113	7.95	3.82	7.24	1.84	NM_004827	ref|Homo sapiens ATP-binding cassette, sub-family G (WHITE), member 2 (Junior blood group) (ABCG2), transcript variant 1, mRNA [NM_004827]	ATP-binding cassette, sub-family G (WHITE), member 2 (Junior blood group)	ref|NM_004827|ref|NM_001257386|ens|ENST00000237612|ens|ENST00000515655	GO:0005515|GO:0005215|GO:0015886|GO:0031966|GO:0005886|GO:0015232|GO:0042493|GO:0042626|GO:0042908|GO:0005634|GO:0044281|GO:0046415|GO:0055085|GO:0005524|GO:0042803|GO:0006879|GO:0008559|GO:0006855|GO:0006810|GO:0005654|GO:0016021	GO:0042626=ATPase activity, coupled to transmembrane movement of substances|GO:0042803=protein homodimerization activity|GO:0015232=heme transporter activity|GO:0008559=xenobiotic-transporting ATPase activity|GO:0005215=transporter activity|GO:0005524=ATP binding|GO:0005515=protein binding	GO:0005886=plasma membrane|GO:0005654=nucleoplasm|GO:0005634=nucleus|GO:0031966=mitochondrial membrane|GO:0016021=integral component of membrane	GO:0055085=transmembrane transport|GO:0006810=transport|GO:0046415=urate metabolic process|GO:0044281=small molecule metabolic process|GO:0006879=cellular iron ion homeostasis|GO:0006855=drug transmembrane transport|GO:0042493=response to drug|GO:0042908=xenobiotic transport|GO:0015886=heme transport	THC2478592	ENST00000237612	Hs.480218	9429
ABCG4	0.030997	Detected	-0.030997	Detected	0	-0.272413	Detected	-0.516798	Compromised	-0.394606	0.0886908	14.3	13.5	11	8.01	NM_022169	ref|Homo sapiens ATP-binding cassette, sub-family G (WHITE), member 4 (ABCG4), transcript variant 1, mRNA [NM_022169]	ATP-binding cassette, sub-family G (WHITE), member 4	ref|NM_022169|ref|NM_001142505|ens|ENST00000619701|gb|AJ308237	GO:0005515|GO:0033344|GO:0046982|GO:0005886|GO:0017127|GO:0008152|GO:0016021|GO:0055085|GO:0016887|GO:0005524|GO:0042803	GO:0016887=ATPase activity|GO:0005524=ATP binding|GO:0005515=protein binding|GO:0042803=protein homodimerization activity|GO:0046982=protein heterodimerization activity|GO:0017127=cholesterol transporter activity	GO:0016021=integral component of membrane|GO:0005886=plasma membrane	GO:0055085=transmembrane transport|GO:0008152=metabolic process|GO:0033344=cholesterol efflux	THC2474895	ENST00000619701	Hs.126378	64137
ABCG5	0.0780659	Compromised	-0.0780659	Compromised	0	-1.66754	Compromised	-0.0286274	Compromised	-0.848084	0.411174	5.97	5.28	1.69	4.54	NM_022436	ref|Homo sapiens ATP-binding cassette, sub-family G (WHITE), member 5 (ABCG5), mRNA [NM_022436]	ATP-binding cassette, sub-family G (WHITE), member 5	ref|NM_022436|ens|ENST00000409962|ens|ENST00000486512|ens|ENST00000260645	GO:0042632|GO:0005515|GO:0007588|GO:0033344|GO:0046982|GO:0005886|GO:0007584|GO:0042493|GO:0017127|GO:0044281|GO:0055085|GO:0045796|GO:0005524|GO:0043235|GO:0030299|GO:0016324|GO:0010212|GO:0010949|GO:0015918|GO:0043190|GO:0016887	GO:0016887=ATPase activity|GO:0005524=ATP binding|GO:0005515=protein binding|GO:0046982=protein heterodimerization activity|GO:0017127=cholesterol transporter activity	GO:0043235=receptor complex|GO:0005886=plasma membrane|GO:0016324=apical plasma membrane|GO:0043190=ATP-binding cassette (ABC) transporter complex	GO:0055085=transmembrane transport|GO:0007584=response to nutrient|GO:0045796=negative regulation of intestinal cholesterol absorption|GO:0042632=cholesterol homeostasis|GO:0007588=excretion|GO:0044281=small molecule metabolic process|GO:0010949=negative regulation of intestinal phytosterol absorption|GO:0015918=sterol transport|GO:0042493=response to drug|GO:0033344=cholesterol efflux|GO:0030299…	NP1147378	ENST00000409962	Hs.132992	64240
ABCG8	-0.0479145	Compromised	0.0479145	Compromised	0	0.299146	Compromised	0.217224	Compromised	0.258185	0.0547603	1.88	1.98	2.27	1.85	NM_022437	ref|Homo sapiens ATP-binding cassette, sub-family G (WHITE), member 8 (ABCG8), mRNA [NM_022437]	ATP-binding cassette, sub-family G (WHITE), member 8	ref|NM_022437|ens|ENST00000272286|ref|XM_006712075|ref|XM_005264483	GO:0042632|GO:0005515|GO:0007588|GO:0033344|GO:0046982|GO:0005886|GO:0007584|GO:0042493|GO:0017127|GO:0044281|GO:0055085|GO:0045796|GO:0005524|GO:0043235|GO:0030299|GO:0016324|GO:0015914|GO:0010949|GO:0015918|GO:0043190|GO:0016887	GO:0016887=ATPase activity|GO:0005524=ATP binding|GO:0005515=protein binding|GO:0046982=protein heterodimerization activity|GO:0017127=cholesterol transporter activity	GO:0043235=receptor complex|GO:0005886=plasma membrane|GO:0016324=apical plasma membrane|GO:0043190=ATP-binding cassette (ABC) transporter complex	GO:0055085=transmembrane transport|GO:0007584=response to nutrient|GO:0045796=negative regulation of intestinal cholesterol absorption|GO:0042632=cholesterol homeostasis|GO:0007588=excretion|GO:0044281=small molecule metabolic process|GO:0010949=negative regulation of intestinal phytosterol absorption|GO:0015918=sterol transport|GO:0042493=response to drug|GO:0015914=phospholipid transport|GO:003…	THC2481118	ENST00000272286	Hs.413931	64241
ABHD1	-0.107854	Detected	0.107854	Detected	0	-0.370801	Detected	-0.406878	Detected	-0.388839	0.0707933	90	103	71.2	59.9	NM_032604	ref|Homo sapiens abhydrolase domain containing 1 (ABHD1), mRNA [NM_032604]	abhydrolase domain containing 1	ref|NM_032604|ens|ENST00000489120|ens|ENST00000316470|ens|ENST00000448950	GO:0052689|GO:0008150|GO:0003674|GO:0008152|GO:0016021	GO:0052689=carboxylic ester hydrolase activity|GO:0003674=molecular_function	GO:0016021=integral component of membrane	GO:0008150=biological_process|GO:0008152=metabolic process	THC2487978	ENST00000489120	Hs.375791	84696
ABHD10	-0.0501752	Compromised	0.0501752	Compromised	0	-0.0676403	Compromised	0.229996	Compromised	0.0811779	0.656711	1.77	1.87	1.66	1.76	NM_018394	ref|Homo sapiens abhydrolase domain containing 10 (ABHD10), transcript variant 1, mRNA [NM_018394]	abhydrolase domain containing 10	ref|NM_018394|ref|NM_001272069|ref|NR_073570|ref|NR_073571	GO:0005739|GO:0019391|GO:0004553|GO:0005829	GO:0004553=hydrolase activity, hydrolyzing O-glycosyl compounds	GO:0005739=mitochondrion|GO:0005829=cytosol	GO:0019391=glucuronoside catabolic process	THC2467493	ENST00000273359	Hs.477115	55347
ABHD11	-0.0280314	Detected	0.0280318	Detected	2.38e-07	0.0411944	Detected	0.0944319	Detected	0.0678132	0.221479	3818.6	3912.38	3803.08	3403.84	NM_001301058	ref|Homo sapiens abhydrolase domain containing 11 (ABHD11), transcript variant 9, mRNA [NM_001301058]	abhydrolase domain containing 11	ref|NM_001301058|ref|NM_001145364|ref|NM_148912|ref|NM_148913	GO:0005739|GO:0008150|GO:0003674|GO:0016787|GO:0008152|GO:0005575	GO:0003674=molecular_function|GO:0016787=hydrolase activity	GO:0005739=mitochondrion|GO:0005575=cellular_component	GO:0008150=biological_process|GO:0008152=metabolic process	THC2483689	ENST00000497897	Hs.647045	83451
ABHD11-AS1	-0.254055	Detected	0.254055	Detected	-1.2e-07	0.250214	Detected	0.569168	Detected	0.409691	0.30531	12.7	17.8	17.1	18.4	NR_026690	ref|Homo sapiens ABHD11 antisense RNA 1 (tail to tail) (ABHD11-AS1), long non-coding RNA [NR_026690]	ABHD11 antisense RNA 1 (tail to tail)	ref|NR_026690|linc|lnc-WBSCR22-1:1|gb|BU595969							Hs.650513	171022
ABHD12	-0.0898087	Detected	0.0898087	Detected	0	0.123414	Detected	-0.0722182	Detected	0.025598	0.864941	637	711	701	528	NM_015600	ref|Homo sapiens abhydrolase domain containing 12 (ABHD12), transcript variant 2, mRNA [NM_015600]	abhydrolase domain containing 12	ref|NM_015600|ref|NM_001042472|ens|ENST00000481556|ens|ENST00000376542	GO:0006660|GO:0010996|GO:0032281|GO:0047372|GO:0007628	GO:0047372=acylglycerol lipase activity	GO:0032281=AMPA glutamate receptor complex	GO:0007628=adult walking behavior|GO:0010996=response to auditory stimulus|GO:0006660=phosphatidylserine catabolic process	THC2526851	ENST00000481556	Hs.441550	26090
ABHD12B	-0.0114126	Compromised	0.0114121	Compromised	-2.385e-07	0.272971	Compromised	0.192494	Compromised	0.232733	0.0308123	1.80776	1.80997	2.08998	1.70499	NM_001206673	ref|Homo sapiens abhydrolase domain containing 12B (ABHD12B), transcript variant 1, mRNA [NM_001206673]	abhydrolase domain containing 12B	ref|NM_001206673|ref|NM_181814|ens|ENST00000382029|ens|ENST00000557345	GO:0016787|GO:0008152	GO:0016787=hydrolase activity		GO:0008152=metabolic process	NP820221	ENST00000554566	Hs.271896	145447
ABHD13	0.054424	Detected	-0.054424	Detected	0	0.0470631	Detected	-0.5173	Compromised	-0.235119	0.499246	10.8	9.87	10.2	5.95	NM_032859	ref|Homo sapiens abhydrolase domain containing 13 (ABHD13), mRNA [NM_032859]	abhydrolase domain containing 13	ref|NM_032859|ens|ENST00000375898|gb|BX647428|gb|BC018608	GO:0016787|GO:0016020|GO:0008152|GO:0016021	GO:0016787=hydrolase activity	GO:0016020=membrane|GO:0016021=integral component of membrane	GO:0008152=metabolic process	THC2601478	ENST00000375898	Hs.183528	84945
ABHD14A	0.0133669	Detected	-0.0133669	Detected	0	-0.27439	Detected	-0.261915	Detected	-0.268152	0.00301223	553.231	535.203	430.205	374.315	NM_015407	ref|Homo sapiens abhydrolase domain containing 14A (ABHD14A), mRNA [NM_015407]	abhydrolase domain containing 14A	ref|NM_015407|ens|ENST00000273596|ens|ENST00000458031|gb|BC002571	GO:0005737|GO:0016787|GO:0008152|GO:0016021|GO:0070062	GO:0016787=hydrolase activity	GO:0070062=extracellular exosome|GO:0005737=cytoplasm|GO:0016021=integral component of membrane	GO:0008152=metabolic process	THC2471728	ENST00000273596	Hs.534400	25864
ABHD14B	-0.0456035	Detected	0.0456035	Detected	0	0.180474	Detected	0.237599	Detected	0.209036	0.0603297	281	295	312	280	NM_032750	ref|Homo sapiens abhydrolase domain containing 14B (ABHD14B), transcript variant 1, mRNA [NM_032750]	abhydrolase domain containing 14B	ref|NM_032750|ref|NM_001146314|ref|NM_001254753|ens|ENST00000361143	GO:0005515|GO:0005737|GO:0016787|GO:0045944|GO:0008152|GO:0005730|GO:0005634|GO:0070062|GO:0005829	GO:0005515=protein binding|GO:0016787=hydrolase activity	GO:0005634=nucleus|GO:0070062=extracellular exosome|GO:0005737=cytoplasm|GO:0005829=cytosol|GO:0005730=nucleolus	GO:0008152=metabolic process|GO:0045944=positive regulation of transcription from RNA polymerase II promoter	THC2599446	ENST00000361143	Hs.420796	84836
ABHD15	0.0929198	Detected	-0.0929198	Detected	0	0.00101328	Detected	-0.290978	Detected	-0.144982	0.490324	247	214	220	155	NM_198147	ref|Homo sapiens abhydrolase domain containing 15 (ABHD15), mRNA [NM_198147]	abhydrolase domain containing 15	ref|NM_198147|ens|ENST00000307201|gb|AY358212|gb|AK056717	GO:0016787|GO:0016020|GO:0008152|GO:0005576	GO:0016787=hydrolase activity	GO:0016020=membrane|GO:0005576=extracellular region	GO:0008152=metabolic process	THC2471398	ENST00000307201	Hs.106510	116236
ABHD16B	0.449384	Compromised	-0.449384	Compromised	2.3e-07	-0.771907	Compromised	-0.47667	Compromised	-0.624289	0.317711	4.2	2.22	1.71	1.81	NM_080622	ref|Homo sapiens abhydrolase domain containing 16B (ABHD16B), mRNA [NM_080622]	abhydrolase domain containing 16B	ref|NM_080622|ens|ENST00000369916|gb|BC031949|tc|THC2479060	GO:0016787|GO:0008152	GO:0016787=hydrolase activity		GO:0008152=metabolic process	THC2479060	ENST00000369916	Hs.266774	140701
ABHD17A	-0.0299718	Detected	0.0299718	Detected	0	-0.0286648	Detected	0.18406	Detected	0.0776978	0.554809	1169.02	1200.95	1110.73	1110.33	NM_031213	ref|Homo sapiens abhydrolase domain containing 17A (ABHD17A), transcript variant 1, mRNA [NM_031213]	abhydrolase domain containing 17A	ref|NM_031213|ref|NM_001130111|ens|ENST00000411545|ens|ENST00000592757	GO:0005515|GO:0008150|GO:0016787|GO:0016020|GO:0008152|GO:0005576	GO:0005515=protein binding|GO:0016787=hydrolase activity	GO:0016020=membrane|GO:0005576=extracellular region	GO:0008150=biological_process|GO:0008152=metabolic process	THC2551680	ENST00000411545	Hs.465542	81926
ABHD17B	0.04179	Detected	-0.04179	Detected	0	-0.27912	Detected	-0.426231	Detected	-0.352675	0.0530064	194.463	180.858	147.784	115.119	NM_001025780	ref|Homo sapiens abhydrolase domain containing 17B (ABHD17B), transcript variant 2, mRNA [NM_001025780]	abhydrolase domain containing 17B	ref|NM_001025780|ens|ENST00000333421|ref|XM_006717134|gb|BC044576	GO:0016787|GO:0016020|GO:0008152|GO:0005576	GO:0016787=hydrolase activity	GO:0016020=membrane|GO:0005576=extracellular region	GO:0008152=metabolic process	THC2484355	ENST00000377041	Hs.380389	51104
ABHD17C	0.0253432	Detected	-0.0253432	Detected	0	-0.0771792	Detected	-0.0646808	Detected	-0.07093	0.11294	1010	961	893	777	NM_021214	ref|Homo sapiens abhydrolase domain containing 17C (ABHD17C), mRNA [NM_021214]	abhydrolase domain containing 17C	ref|NM_021214|ens|ENST00000258884|ens|ENST00000558464|ens|ENST00000559506	GO:0016787|GO:0008152	GO:0016787=hydrolase activity		GO:0008152=metabolic process	THC2464839	ENST00000258884	Hs.459072	58489
ABHD2	-0.0130901	Detected	0.0130901	Detected	0	0.0221505	Detected	-0.535951	Detected	-0.2569	0.454857	84.4	84.7	82.1	48.1	NM_007011	ref|Homo sapiens abhydrolase domain containing 2 (ABHD2), transcript variant 1, mRNA [NM_007011]	abhydrolase domain containing 2	ref|NM_007011|ref|NM_152924|ens|ENST00000352732|ens|ENST00000355100	GO:0052689|GO:0008150|GO:0003674|GO:0030336|GO:0008152|GO:0009611|GO:0016021	GO:0052689=carboxylic ester hydrolase activity|GO:0003674=molecular_function	GO:0016021=integral component of membrane	GO:0008150=biological_process|GO:0008152=metabolic process|GO:0009611=response to wounding|GO:0030336=negative regulation of cell migration	THC2491788	ENST00000352732	Hs.122337	11057
ABHD3	0.0109394	Detected	-0.0109394	Detected	0	0.180207	Detected	-0.0809195	Detected	0.049644	0.741204	341	331	364	262	NM_138340	ref|Homo sapiens abhydrolase domain containing 3 (ABHD3), mRNA [NM_138340]	abhydrolase domain containing 3	ref|NM_138340|ens|ENST00000577564|ens|ENST00000289119|ref|XR_243847	GO:0052689|GO:0008150|GO:0003674|GO:0008152|GO:0016021|GO:0005575	GO:0052689=carboxylic ester hydrolase activity|GO:0003674=molecular_function	GO:0016021=integral component of membrane|GO:0005575=cellular_component	GO:0008150=biological_process|GO:0008152=metabolic process	THC2687867	ENST00000577564	Hs.397978	171586
ABHD4	0.00171971	Detected	-0.00171971	Detected	0	0.215684	Detected	0.373565	Detected	0.294624	0.0649092	772	759	850	818	NM_022060	ref|Homo sapiens abhydrolase domain containing 4 (ABHD4), mRNA [NM_022060]	abhydrolase domain containing 4	ref|NM_022060|ens|ENST00000428304|ref|XR_245712|ref|XM_005267986	GO:0016042|GO:0016787	GO:0016787=hydrolase activity		GO:0016042=lipid catabolic process	THC2462099	ENST00000428304	Hs.445665	63874
ABHD5	-0.0429561	Detected	0.0429561	Detected	0	0.0649354	Detected	-0.0176456	Detected	0.0236449	0.729827	1740	1820	1780	1450	NM_016006	ref|Homo sapiens abhydrolase domain containing 5 (ABHD5), mRNA [NM_016006]	abhydrolase domain containing 5	ref|NM_016006|ens|ENST00000458276|gb|AF151816|gb|BC021958	GO:0005811|GO:0004806|GO:0042171|GO:0010898|GO:0005634|GO:0044281|GO:0003841|GO:0030154|GO:0043231|GO:0005829|GO:0005737|GO:0010891|GO:0006631|GO:0019433|GO:0006654|GO:0051006	GO:0003841=1-acylglycerol-3-phosphate O-acyltransferase activity|GO:0042171=lysophosphatidic acid acyltransferase activity|GO:0004806=triglyceride lipase activity	GO:0005811=lipid particle|GO:0005634=nucleus|GO:0005737=cytoplasm|GO:0043231=intracellular membrane-bounded organelle|GO:0005829=cytosol	GO:0010891=negative regulation of sequestering of triglyceride|GO:0006631=fatty acid metabolic process|GO:0006654=phosphatidic acid biosynthetic process|GO:0044281=small molecule metabolic process|GO:0030154=cell differentiation|GO:0010898=positive regulation of triglyceride catabolic process|GO:0019433=triglyceride catabolic process|GO:0051006=positive regulation of lipoprotein lipase activity	THC2464058	ENST00000458276	Hs.19385	51099
ABHD6	0.0250728	Detected	-0.0250728	Detected	0	0.0203545	Detected	-0.138879	Detected	-0.0592623	0.551339	353	336	334	258	NM_020676	ref|Homo sapiens abhydrolase domain containing 6 (ABHD6), mRNA [NM_020676]	abhydrolase domain containing 6	ref|NM_020676|ens|ENST00000478253|ens|ENST00000613521|ens|ENST00000295962	GO:0005739|GO:0030336|GO:0032281|GO:0008152|GO:0047372|GO:0060292|GO:2000124|GO:0070062	GO:0047372=acylglycerol lipase activity	GO:0032281=AMPA glutamate receptor complex|GO:0070062=extracellular exosome|GO:0005739=mitochondrion	GO:0008152=metabolic process|GO:2000124=regulation of endocannabinoid signaling pathway|GO:0060292=long term synaptic depression|GO:0030336=negative regulation of cell migration	THC2516111	ENST00000478253	Hs.476454	57406
ABHD8	0.0347707	Detected	-0.0347707	Detected	0	0.156165	Detected	0.153582	Detected	0.154874	0.0469482	460	432	475	409	NM_024527	ref|Homo sapiens abhydrolase domain containing 8 (ABHD8), mRNA [NM_024527]	abhydrolase domain containing 8	ref|NM_024527|ens|ENST00000247706|gb|AK021805|gb|BC011536	GO:0016787|GO:0008152|GO:0070062	GO:0016787=hydrolase activity	GO:0070062=extracellular exosome	GO:0008152=metabolic process	THC2467201	ENST00000247706	Hs.515664	79575
ABI1	-0.0336778	Detected	0.0336778	Detected	0	-0.234211	Detected	-0.330295	Detected	-0.282253	0.0405951	276	285	228	184	NM_005470	ref|Homo sapiens abl-interactor 1 (ABI1), transcript variant 1, mRNA [NM_005470]	abl-interactor 1	ref|NM_005470|ref|NM_001178116|ref|NM_001012750|ref|NM_001178119	GO:0008092|GO:0005515|GO:0031209|GO:0008285|GO:0030054|GO:0005783|GO:0061098|GO:0001756|GO:0006928|GO:0005634|GO:0030175|GO:0032403|GO:0005829|GO:0030426|GO:0005622|GO:0030296|GO:0045211|GO:0005856|GO:0070062|GO:0072673|GO:0048010|GO:0014069|GO:0018108|GO:0030027|GO:0035855|GO:0008154|GO:0045087|GO:0007169|GO:0038096	GO:0032403=protein complex binding|GO:0005515=protein binding|GO:0030296=protein tyrosine kinase activator activity|GO:0008092=cytoskeletal protein binding	GO:0014069=postsynaptic density|GO:0030426=growth cone|GO:0070062=extracellular exosome|GO:0045211=postsynaptic membrane|GO:0005829=cytosol|GO:0030027=lamellipodium|GO:0005783=endoplasmic reticulum|GO:0005622=intracellular|GO:0031209=SCAR complex|GO:0005634=nucleus|GO:0005856=cytoskeleton|GO:0030054=cell junction|GO:0030175=filopodium	GO:0018108=peptidyl-tyrosine phosphorylation|GO:0008285=negative regulation of cell proliferation|GO:0061098=positive regulation of protein tyrosine kinase activity|GO:0038096=Fc-gamma receptor signaling pathway involved in phagocytosis|GO:0035855=megakaryocyte development|GO:0008154=actin polymerization or depolymerization|GO:0007169=transmembrane receptor protein tyrosine kinase signaling pathw…	THC2462802	ENST00000346832	Hs.508148	10006
ABI2	-0.0209403	Detected	0.0209403	Detected	0	-0.319535	Detected	-0.13372	Detected	-0.226628	0.140357	68.8	69.8	53.1	52.1	NM_005759	ref|Homo sapiens abl-interactor 2 (ABI2), transcript variant 3, mRNA [NM_005759]	abl-interactor 2	ref|NM_005759|ref|NM_001282925|ref|NM_001282932|ref|NM_001282926	GO:0005515|GO:0031209|GO:0017124|GO:0006928|GO:0018108|GO:0030175|GO:0032403|GO:0003677|GO:0030027|GO:0005829|GO:0048365|GO:0005737|GO:0016601|GO:0016477|GO:0008154|GO:0007010|GO:2000601|GO:0019900|GO:0005856|GO:0070064|GO:0031625|GO:0008093	GO:0008093=cytoskeletal adaptor activity|GO:0003677=DNA binding|GO:0070064=proline-rich region binding|GO:0005515=protein binding|GO:0031625=ubiquitin protein ligase binding|GO:0048365=Rac GTPase binding|GO:0017124=SH3 domain binding|GO:0032403=protein complex binding|GO:0019900=kinase binding	GO:0031209=SCAR complex|GO:0005856=cytoskeleton|GO:0005737=cytoplasm|GO:0030175=filopodium|GO:0005829=cytosol|GO:0030027=lamellipodium	GO:0016601=Rac protein signal transduction|GO:0018108=peptidyl-tyrosine phosphorylation|GO:0007010=cytoskeleton organization|GO:0008154=actin polymerization or depolymerization|GO:0006928=movement of cell or subcellular component|GO:2000601=positive regulation of Arp2/3 complex-mediated actin nucleation|GO:0016477=cell migration	THC2570024	ENST00000261018	Hs.471156	10152
ABI3	-0.0145495	Detected	0.0145495	Detected	0	-0.253339	Detected	0.265713	Detected	0.00618733	0.983171	17.9	18	14.4	17.8	NM_016428	ref|Homo sapiens ABI family, member 3 (ABI3), transcript variant 1, mRNA [NM_016428]	ABI family, member 3	ref|NM_016428|ref|NM_001135186|ens|ENST00000419580|ens|ENST00000225941	GO:0030334|GO:0005622|GO:0005515|GO:0005737|GO:0016020|GO:0006928|GO:0018108|GO:0030027	GO:0005515=protein binding	GO:0005737=cytoplasm|GO:0016020=membrane|GO:0005622=intracellular|GO:0030027=lamellipodium	GO:0018108=peptidyl-tyrosine phosphorylation|GO:0006928=movement of cell or subcellular component|GO:0030334=regulation of cell migration	THC2604731	ENST00000419580	Hs.130719	51225
ABI3BP	-0.103449	Compromised	0.103448	Compromised	-2.4e-07	-0.177187	Compromised	0.22597	Compromised	0.0243914	0.924096	2.46577	2.80475	2.22406	2.53698	NM_015429	ref|Homo sapiens ABI family, member 3 (NESH) binding protein (ABI3BP), mRNA [NM_015429]	ABI family, member 3 (NESH) binding protein	ref|NM_015429|ens|ENST00000475896|ens|ENST00000284322|ref|XM_005247318	GO:0031012|GO:0030198|GO:0010811|GO:0005518|GO:0005614|GO:0008201|GO:0005615	GO:0005518=collagen binding|GO:0008201=heparin binding	GO:0005615=extracellular space|GO:0005614=interstitial matrix|GO:0031012=extracellular matrix	GO:0030198=extracellular matrix organization|GO:0010811=positive regulation of cell-substrate adhesion	THC2483291	ENST00000284322	Hs.477015	25890
ABL1	0.0512805	Detected	-0.0512805	Detected	0	-0.105137	Detected	0.0371685	Detected	-0.0339842	0.735751	215.586	197.882	183.622	174.812	NM_007313	ref|Homo sapiens ABL proto-oncogene 1, non-receptor tyrosine kinase (ABL1), transcript variant b, mRNA [NM_007313]	ABL proto-oncogene 1, non-receptor tyrosine kinase	ref|NM_007313|ens|ENST00000372348|gb|M14753|gb|AB209456	GO:0005515|GO:0002333|GO:0046632|GO:0050731|GO:0048538|GO:0048536|GO:0030155|GO:0030154|GO:0042692|GO:0007173|GO:0007411|GO:0030100|GO:0042127|GO:0034446|GO:0006298|GO:0043123|GO:0033690|GO:0038083|GO:0006979|GO:0043124|GO:0019905|GO:0031965|GO:0022408|GO:0000287|GO:0002322|GO:0021587|GO:0018108|GO:0031234|GO:0042770|GO:0045931|GO:0045930|GO:0045087|GO:0004515|GO:0010506|GO:0005654|GO:0038096|GO:…	GO:0008022=protein C-terminus binding|GO:0030145=manganese ion binding|GO:0019905=syntaxin binding|GO:0004672=protein kinase activity|GO:0003785=actin monomer binding|GO:0005515=protein binding|GO:0000287=magnesium ion binding|GO:0005524=ATP binding|GO:0004515=nicotinate-nucleotide adenylyltransferase activity|GO:0004713=protein tyrosine kinase activity|GO:0004715=non-membrane spanning protein ty…	GO:0015629=actin cytoskeleton|GO:0031234=extrinsic component of cytoplasmic side of plasma membrane|GO:0005829=cytosol|GO:0005634=nucleus|GO:0005730=nucleolus|GO:0005654=nucleoplasm|GO:0031252=cell leading edge|GO:0031965=nuclear membrane|GO:0048471=perinuclear region of cytoplasm|GO:0005737=cytoplasm|GO:0005739=mitochondrion	GO:0007050=cell cycle arrest|GO:0018108=peptidyl-tyrosine phosphorylation|GO:0007173=epidermal growth factor receptor signaling pathway|GO:0022408=negative regulation of cell-cell adhesion|GO:0042770=signal transduction in response to DNA damage|GO:0007411=axon guidance|GO:0002322=B cell proliferation involved in immune response|GO:0006914=autophagy|GO:0030100=regulation of endocytosis|GO:0033690…	NP523662	ENST00000318560	Hs.431048	25
ABL2	-0.101771	Detected	0.101771	Detected	0	-1.3064	Detected	0.0618207	Detected	-0.622288	0.463219	177.558	201.499	73.1316	162.85	NM_007314	ref|Homo sapiens ABL proto-oncogene 2, non-receptor tyrosine kinase (ABL2), transcript variant b, mRNA [NM_007314]	ABL proto-oncogene 2, non-receptor tyrosine kinase	ref|NM_007314|ref|NM_001168236|ref|NM_005158|ref|NM_001168237	GO:0005515|GO:0006909|GO:0051353|GO:0071300|GO:0046632|GO:2000145|GO:2000096|GO:0030155|GO:2000249|GO:0051015|GO:0007173|GO:0007411|GO:0030100|GO:0042127|GO:0050885|GO:0070374|GO:0043123|GO:0038083|GO:0051017|GO:0035640|GO:0022408|GO:0000287|GO:0021587|GO:0018108|GO:0001891|GO:0030027|GO:0031234|GO:0097062|GO:0008542|GO:0045087|GO:0010976|GO:0010506|GO:0035024|GO:0015629|GO:0007204|GO:0005829|GO:…	GO:0030145=manganese ion binding|GO:0004672=protein kinase activity|GO:0003785=actin monomer binding|GO:0051015=actin filament binding|GO:0005515=protein binding|GO:0000287=magnesium ion binding|GO:0005524=ATP binding|GO:0004713=protein tyrosine kinase activity|GO:0004715=non-membrane spanning protein tyrosine kinase activity|GO:0005102=receptor binding	GO:0043197=dendritic spine|GO:0015629=actin cytoskeleton|GO:0031234=extrinsic component of cytoplasmic side of plasma membrane|GO:0005829=cytosol|GO:0030027=lamellipodium|GO:0001891=phagocytic cup	GO:0018108=peptidyl-tyrosine phosphorylation|GO:0035640=exploration behavior|GO:0032092=positive regulation of protein binding|GO:0007173=epidermal growth factor receptor signaling pathway|GO:0022408=negative regulation of cell-cell adhesion|GO:0007411=axon guidance|GO:0008542=visual learning|GO:0010976=positive regulation of neuron projection development|GO:0030100=regulation of endocytosis|GO:2…	THC2501440	ENST00000502732	Hs.159472	27
ABLIM1	-0.0360622	Detected	0.0360622	Detected	0	-0.0840449	Detected	-0.0614982	Detected	-0.0727715	0.193953	94.221	97.6156	86.5159	75.8037	NM_001003408	ref|Homo sapiens actin binding LIM protein 1 (ABLIM1), transcript variant 3, mRNA [NM_001003408]	actin binding LIM protein 1	ref|NM_001003408|ref|NM_001003407|ref|NM_002313|ref|NM_006720	GO:0005515|GO:0001725|GO:0030032|GO:0003779|GO:0015629|GO:0030027|GO:0042384|GO:0005737|GO:0007411|GO:0045944|GO:0007010|GO:0009887|GO:0008270|GO:0007601	GO:0008270=zinc ion binding|GO:0005515=protein binding|GO:0003779=actin binding	GO:0005737=cytoplasm|GO:0001725=stress fiber|GO:0015629=actin cytoskeleton|GO:0030027=lamellipodium	GO:0007010=cytoskeleton organization|GO:0007411=axon guidance|GO:0045944=positive regulation of transcription from RNA polymerase II promoter|GO:0007601=visual perception|GO:0009887=organ morphogenesis|GO:0042384=cilium assembly|GO:0030032=lamellipodium assembly	THC2610804	ENST00000369252	Hs.438236	3983
ABLIM2	-0.038914	Detected	0.038914	Detected	0	-0.243623	Detected	-0.590369	Detected	-0.416996	0.143496	82.3913	85.6979	67.8657	46.0337	NM_001130083	ref|Homo sapiens actin binding LIM protein family, member 2 (ABLIM2), transcript variant 1, mRNA [NM_001130083]	actin binding LIM protein family, member 2	ref|NM_001130083|ref|NM_001130084|ref|NM_001130085|ref|NM_001130086	GO:0030036|GO:0007411|GO:0045944|GO:0008270|GO:0003779|GO:0030016|GO:0015629|GO:0006351	GO:0008270=zinc ion binding|GO:0003779=actin binding	GO:0015629=actin cytoskeleton|GO:0030016=myofibril	GO:0006351=transcription, DNA-templated|GO:0007411=axon guidance|GO:0045944=positive regulation of transcription from RNA polymerase II promoter|GO:0030036=actin cytoskeleton organization	NP1277327	ENST00000514025	Hs.233404	84448
ABLIM3	0.0644817	Detected	-0.0644817	Detected	0	-0.43429	Detected	-0.152025	Detected	-0.293158	0.199435	97.2	87.6	65.3	68.5	NM_014945	ref|Homo sapiens actin binding LIM protein family, member 3 (ABLIM3), transcript variant 2, mRNA [NM_014945]	actin binding LIM protein family, member 3	ref|NM_014945|ref|NM_001301028|ref|NM_001301015|ref|NM_001301027	GO:0042384|GO:0005737|GO:0001725|GO:0030036|GO:0007411|GO:0045944|GO:0030032|GO:0008270|GO:0003779|GO:0030027|GO:0006351	GO:0008270=zinc ion binding|GO:0003779=actin binding	GO:0005737=cytoplasm|GO:0001725=stress fiber|GO:0030027=lamellipodium	GO:0006351=transcription, DNA-templated|GO:0042384=cilium assembly|GO:0007411=axon guidance|GO:0030032=lamellipodium assembly|GO:0045944=positive regulation of transcription from RNA polymerase II promoter|GO:0030036=actin cytoskeleton organization	THC2620690	ENST00000506113	Hs.49688	22885
ABO	0.0270791	Detected	-0.0270791	Detected	0	-0.0449042	Detected	-0.203017	Detected	-0.12396	0.276217	86.1337	81.7579	77.7851	60.1322	ENST00000453660	ens|ABO blood group (transferase A, alpha 1-3-N-acetylgalactosaminyltransferase; transferase B, alpha 1-3-galactosyltransferase) [Source:HGNC Symbol;Acc:HGNC:79] [ENST00000453660]	ABO blood group (transferase A, alpha 1-3-N-acetylgalactosaminyltransferase; transferase B, alpha 1-3-galactosyltransferase)	ens|ENST00000453660|linc|lnc-OBP2B-1:1|linc|TCONS_00016890|gb|AK124587	GO:0004381|GO:0032580|GO:0004380|GO:0006486|GO:0005576|GO:0016021|GO:0046872	GO:0004380=glycoprotein-fucosylgalactoside alpha-N-acetylgalactosaminyltransferase activity|GO:0046872=metal ion binding|GO:0004381=fucosylgalactoside 3-alpha-galactosyltransferase activity	GO:0032580=Golgi cisterna membrane|GO:0016021=integral component of membrane|GO:0005576=extracellular region	GO:0006486=protein glycosylation	THC2491790	ENST00000453660	Hs.654423	28
ABR	-0.109845	Detected	0.109845	Detected	0	0.163403	Detected	0.0558741	Detected	0.109638	0.464597	245.186	281.377	281.283	225.207	NM_021962	ref|Homo sapiens active BCR-related (ABR), transcript variant 1, mRNA [NM_021962]	active BCR-related	ref|NM_021962|ref|NM_001159746|ref|NM_001092|ref|NM_001282149	GO:0043314|GO:0051056|GO:0048011|GO:0030336|GO:0043065|GO:0030036|GO:0042472|GO:0005886|GO:0007264|GO:0097190|GO:0032855|GO:0005829|GO:0050766|GO:0016020|GO:0007420|GO:0050728|GO:0050885|GO:0032496|GO:0005089|GO:0030675|GO:0005096	GO:0005096=GTPase activator activity|GO:0005089=Rho guanyl-nucleotide exchange factor activity|GO:0030675=GTPase activator activity	GO:0005886=plasma membrane|GO:0016020=membrane|GO:0005829=cytosol	GO:0007264=small GTPase mediated signal transduction|GO:0050728=negative regulation of inflammatory response|GO:0097190=apoptotic signaling pathway|GO:0007420=brain development|GO:0043314=negative regulation of neutrophil degranulation|GO:0048011=neurotrophin TRK receptor signaling pathway|GO:0051056=regulation of small GTPase mediated signal transduction|GO:0043065=positive regulation of apoptot…	THC2498261	ENST00000544583	Hs.159306	29
ABRA	-0.0214329	Compromised	0.0214329	Compromised	0	0.497706	Compromised	0.128676	Compromised	0.313191	0.233834	1.97	2	2.68	1.79	NM_139166	ref|Homo sapiens actin-binding Rho activating protein (ABRA), mRNA [NM_139166]	actin-binding Rho activating protein	ref|NM_139166|ens|ENST00000311955|gb|AK056976|gb|AL833422	GO:0051091|GO:0005886|GO:0045944|GO:0035025|GO:0003713|GO:0003779|GO:0015629|GO:0030017|GO:0006351|GO:0000060	GO:0003713=transcription coactivator activity|GO:0003779=actin binding	GO:0015629=actin cytoskeleton|GO:0005886=plasma membrane|GO:0030017=sarcomere	GO:0035025=positive regulation of Rho protein signal transduction|GO:0006351=transcription, DNA-templated|GO:0000060=protein import into nucleus, translocation|GO:0051091=positive regulation of sequence-specific DNA binding transcription factor activity|GO:0045944=positive regulation of transcription from RNA polymerase II promoter	THC2601291	ENST00000311955	Hs.374668	137735
ABRACL	0.0627117	Detected	-0.0627122	Detected	-2.37e-07	-0.0995812	Detected	-0.100931	Detected	-0.100256	0.251023	14500	13100	12300	10600	NM_021243	ref|Homo sapiens ABRA C-terminal like (ABRACL), mRNA [NM_021243]	ABRA C-terminal like	ref|NM_021243|ens|ENST00000367660|gb|BC014953|gb|AF161398					THC2463611	ENST00000367660	Hs.600861	58527
ABT1	-0.0517619	Detected	0.0517619	Detected	0	0.111954	Detected	-0.0675032	Detected	0.0222254	0.850003	221	234	235	179	NM_013375	ref|Homo sapiens activator of basal transcription 1 (ABT1), mRNA [NM_013375]	activator of basal transcription 1	ref|NM_013375|ens|ENST00000274849|tc|THC2466588|tc|THC2659638	GO:0005515|GO:0005667|GO:0021522|GO:0006366|GO:0006357|GO:0000166|GO:0003713|GO:0005730|GO:0005634|GO:0003677	GO:0000166=nucleotide binding|GO:0003677=DNA binding|GO:0005515=protein binding|GO:0003713=transcription coactivator activity	GO:0005667=transcription factor complex|GO:0005634=nucleus|GO:0005730=nucleolus	GO:0021522=spinal cord motor neuron differentiation|GO:0006366=transcription from RNA polymerase II promoter|GO:0006357=regulation of transcription from RNA polymerase II promoter	THC2466588	ENST00000274849	Hs.254406	29777
ABTB1	-0.0158622	Detected	0.0158622	Detected	0	-0.629894	Detected	-0.587933	Detected	-0.608913	0.00186055	718.123	723.45	445.399	395.537	NM_032548	ref|Homo sapiens ankyrin repeat and BTB (POZ) domain containing 1 (ABTB1), transcript variant 1, mRNA [NM_032548]	ankyrin repeat and BTB (POZ) domain containing 1	ref|NM_032548|ref|NM_172027|ref|NR_033429|ens|ENST00000464431	GO:0005737|GO:0005886|GO:0005730|GO:0003746|GO:0006414	GO:0003746=translation elongation factor activity	GO:0005737=cytoplasm|GO:0005730=nucleolus|GO:0005886=plasma membrane	GO:0006414=translational elongation	NP852599	ENST00000464431	Hs.107812	80325
ABTB2	-0.0105307	Detected	0.0105307	Detected	0	0.0052731	Detected	0.0920694	Detected	0.0486712	0.389578	1490	1490	1430	1310	NM_145804	ref|Homo sapiens ankyrin repeat and BTB (POZ) domain containing 2 (ABTB2), mRNA [NM_145804]	ankyrin repeat and BTB (POZ) domain containing 2	ref|NM_145804|ens|ENST00000435224|gb|AK095632|gb|AK091560	GO:0003674|GO:0046982|GO:0097237|GO:0005654|GO:0005634|GO:0005575	GO:0046982=protein heterodimerization activity|GO:0003674=molecular_function	GO:0005634=nucleus|GO:0005575=cellular_component|GO:0005654=nucleoplasm	GO:0097237=cellular response to toxic substance	THC2464560	ENST00000435224	Hs.23361	25841
ACAA1	-2.21922	Detected	2.21922	Detected	0	2.27001	Detected	2.28455	Detected	2.27728	0.412714	207.787	4440	4430	3860	ENST00000451419	ens|acetyl-CoA acyltransferase 1 [Source:HGNC Symbol;Acc:HGNC:82] [ENST00000451419]	acetyl-CoA acyltransferase 1	ens|ENST00000451419|linc|lnc-ACAA1-1:1|gb|BG533949	GO:0005515|GO:0000038|GO:0006635|GO:0016401|GO:0005782|GO:0044281|GO:0036109|GO:0033559|GO:0043231|GO:0016020|GO:0008206|GO:0033540|GO:0003988|GO:0044255|GO:0005777	GO:0005515=protein binding|GO:0003988=acetyl-CoA C-acyltransferase activity|GO:0016401=palmitoyl-CoA oxidase activity	GO:0005782=peroxisomal matrix|GO:0005777=peroxisome|GO:0043231=intracellular membrane-bounded organelle|GO:0016020=membrane	GO:0033540=fatty acid beta-oxidation using acyl-CoA oxidase|GO:0044255=cellular lipid metabolic process|GO:0000038=very long-chain fatty acid metabolic process|GO:0008206=bile acid metabolic process|GO:0044281=small molecule metabolic process|GO:0006635=fatty acid beta-oxidation|GO:0036109=alpha-linolenic acid metabolic process|GO:0033559=unsaturated fatty acid metabolic process		ENST00000451419	Hs.706310	30
ACAA2	0.0757592	Detected	-0.0757592	Detected	0	-0.190648	Detected	-0.331041	Detected	-0.260845	0.127478	2040	1810	1610	1260	NM_006111	ref|Homo sapiens acetyl-CoA acyltransferase 2 (ACAA2), mRNA [NM_006111]	acetyl-CoA acyltransferase 2	ref|NM_006111|ens|ENST00000591171|gb|AK054673|gb|AK093311	GO:0005739|GO:0005515|GO:0006695|GO:0006631|GO:0005743|GO:0071456|GO:0003988|GO:0070062	GO:0005515=protein binding|GO:0003988=acetyl-CoA C-acyltransferase activity	GO:0070062=extracellular exosome|GO:0005739=mitochondrion|GO:0005743=mitochondrial inner membrane	GO:0006695=cholesterol biosynthetic process|GO:0071456=cellular response to hypoxia|GO:0006631=fatty acid metabolic process	THC2469571	ENST00000591171	Hs.200136	10449
ACACA	0.0193059	Detected	-0.0193059	Detected	0	0.164029	Detected	-0.00536466	Detected	0.0793324	0.457521	619.949	594.829	650.6	499.032	NM_198839	ref|Homo sapiens acetyl-CoA carboxylase alpha (ACACA), transcript variant 2, mRNA [NM_198839]	acetyl-CoA carboxylase alpha	ref|NM_198839|ref|NM_198834|ref|NM_198836|ens|ENST00000612007	GO:0005515|GO:0006768|GO:0006767|GO:0035338|GO:0044281|GO:0015629|GO:0046872|GO:0005829|GO:0005739|GO:0005737|GO:0001894|GO:0051289|GO:0019432|GO:0006633|GO:0003989|GO:0044255|GO:0070062|GO:0006853|GO:0055088|GO:0005730|GO:2001295|GO:0006084|GO:0005524|GO:0006112|GO:0031325|GO:0006766|GO:0004075|GO:0044268	GO:0005524=ATP binding|GO:0003989=acetyl-CoA carboxylase activity|GO:0004075=biotin carboxylase activity|GO:0005515=protein binding|GO:0046872=metal ion binding	GO:0005730=nucleolus|GO:0070062=extracellular exosome|GO:0015629=actin cytoskeleton|GO:0005829=cytosol|GO:0005737=cytoplasm|GO:0005739=mitochondrion	GO:2001295=malonyl-CoA biosynthetic process|GO:0006084=acetyl-CoA metabolic process|GO:0044255=cellular lipid metabolic process|GO:0006766=vitamin metabolic process|GO:0044281=small molecule metabolic process|GO:0051289=protein homotetramerization|GO:0035338=long-chain fatty-acyl-CoA biosynthetic process|GO:0055088=lipid homeostasis|GO:0006112=energy reserve metabolic process|GO:0044268=multicell…	NP831371	ENST00000612007	Hs.160556	31
ACACB	-0.0197787	Detected	0.0197787	Detected	0	-0.270365	Detected	-0.510604	Detected	-0.390484	0.0849868	115.77	117.264	92.3753	67.4596	NM_001093	ref|Homo sapiens acetyl-CoA carboxylase beta (ACACB), mRNA [NM_001093]	acetyl-CoA carboxylase beta	ref|NM_001093|ens|ENST00000377848|ens|ENST00000338432|ref|XR_429097	GO:0005515|GO:0014070|GO:0006768|GO:0006767|GO:0060421|GO:0005741|GO:0005634|GO:0044281|GO:0046872|GO:0005829|GO:0005739|GO:0051289|GO:0006633|GO:0003989|GO:0044255|GO:0006853|GO:0042493|GO:0046322|GO:0010884|GO:2001295|GO:0006084|GO:0005524|GO:0012505|GO:0006112|GO:0031325|GO:0006766|GO:0009374|GO:0004075	GO:0009374=biotin binding|GO:0005524=ATP binding|GO:0003989=acetyl-CoA carboxylase activity|GO:0004075=biotin carboxylase activity|GO:0005515=protein binding|GO:0046872=metal ion binding	GO:0005829=cytosol|GO:0005741=mitochondrial outer membrane|GO:0005634=nucleus|GO:0005739=mitochondrion|GO:0012505=endomembrane system	GO:2001295=malonyl-CoA biosynthetic process|GO:0060421=positive regulation of heart growth|GO:0006084=acetyl-CoA metabolic process|GO:0044255=cellular lipid metabolic process|GO:0006766=vitamin metabolic process|GO:0044281=small molecule metabolic process|GO:0051289=protein homotetramerization|GO:0046322=negative regulation of fatty acid oxidation|GO:0006112=energy reserve metabolic process|GO:00…	THC2506477	ENST00000538526	Hs.234898	32
ACAD10	-0.0232315	Detected	0.0232315	Detected	0	-0.0840726	Detected	0.134607	Detected	0.0252674	0.842166	179.123	182.305	163.015	163.631	NM_025247	ref|Homo sapiens acyl-CoA dehydrogenase family, member 10 (ACAD10), transcript variant 2, mRNA [NM_025247]	acyl-CoA dehydrogenase family, member 10	ref|NM_025247|ref|NM_001136538|ens|ENST00000547491|ens|ENST00000508303	GO:0005739|GO:0016787|GO:0050660|GO:0003995|GO:0055114|GO:0016772	GO:0003995=acyl-CoA dehydrogenase activity|GO:0050660=flavin adenine dinucleotide binding|GO:0016772=transferase activity, transferring phosphorus-containing groups|GO:0016787=hydrolase activity	GO:0005739=mitochondrion	GO:0055114=oxidation-reduction process	NP1163233	ENST00000413681	Hs.331141	80724
ACAD11	-0.0960865	Detected	0.0960867	Detected	1.2e-07	0.259751	Detected	0.0812275	Detected	0.170489	0.323259	13.5	15.2	16.4	12.5	NM_032169	ref|Homo sapiens acyl-CoA dehydrogenase family, member 11 (ACAD11), mRNA [NM_032169]	acyl-CoA dehydrogenase family, member 11	ref|NM_032169|ref|NR_037804|ens|ENST00000485198|ens|ENST00000264990	GO:0017099|GO:0031966|GO:0050660|GO:0005634|GO:0070991|GO:0033539|GO:0004466|GO:0016772|GO:0005777	GO:0070991=medium-chain-acyl-CoA dehydrogenase activity|GO:0050660=flavin adenine dinucleotide binding|GO:0017099=very-long-chain-acyl-CoA dehydrogenase activity|GO:0016772=transferase activity, transferring phosphorus-containing groups|GO:0004466=long-chain-acyl-CoA dehydrogenase activity	GO:0005634=nucleus|GO:0005777=peroxisome|GO:0031966=mitochondrial membrane	GO:0033539=fatty acid beta-oxidation using acyl-CoA dehydrogenase	THC2478579	ENST00000485198	Hs.441378	84129
ACAD8	0.0719988	Detected	-0.0719988	Detected	0	-0.370819	Detected	-0.273797	Detected	-0.322308	0.0655059	92.5	82.5	64.6	59.6	NM_014384	ref|Homo sapiens acyl-CoA dehydrogenase family, member 8 (ACAD8), mRNA [NM_014384]	acyl-CoA dehydrogenase family, member 8	ref|NM_014384|ens|ENST00000531338|ens|ENST00000533387|ens|ENST00000281182	GO:0006629|GO:0034641|GO:0006355|GO:0005759|GO:0050660|GO:0006574|GO:0009083|GO:0003995|GO:0044281|GO:0006351|GO:0055114	GO:0003995=acyl-CoA dehydrogenase activity|GO:0050660=flavin adenine dinucleotide binding	GO:0005759=mitochondrial matrix	GO:0044281=small molecule metabolic process|GO:0009083=branched-chain amino acid catabolic process|GO:0006351=transcription, DNA-templated|GO:0006629=lipid metabolic process|GO:0006574=valine catabolic process|GO:0006355=regulation of transcription, DNA-templated|GO:0055114=oxidation-reduction process|GO:0034641=cellular nitrogen compound metabolic process	THC2711968	ENST00000531338	Hs.14791	27034
ACAD9	-0.0282593	Detected	0.0282598	Detected	2.385e-07	0.108064	Detected	0.0854549	Detected	0.0967596	0.0863283	2720.57	2788.26	2838.5	2410.41	NM_014049	ref|Homo sapiens acyl-CoA dehydrogenase family, member 9 (ACAD9), transcript variant 1, mRNA [NM_014049]	acyl-CoA dehydrogenase family, member 9	ref|NM_014049|ref|NR_033426|ens|ENST00000511325|ens|ENST00000511526	GO:0005739|GO:0005515|GO:0032981|GO:0050660|GO:0005634|GO:0003995|GO:0030425|GO:0055114	GO:0003995=acyl-CoA dehydrogenase activity|GO:0005515=protein binding|GO:0050660=flavin adenine dinucleotide binding	GO:0005634=nucleus|GO:0030425=dendrite|GO:0005739=mitochondrion	GO:0055114=oxidation-reduction process|GO:0032981=mitochondrial respiratory chain complex I assembly	NP073436	ENST00000511325	Hs.567482	28976
ACADL	-0.461607	Compromised	0.461607	Compromised	0	-0.995315	Compromised	-0.70312	Compromised	-0.849217	0.221531	2.44	4.56	1.6	1.69	NM_001608	ref|Homo sapiens acyl-CoA dehydrogenase, long chain (ACADL), mRNA [NM_001608]	acyl-CoA dehydrogenase, long chain	ref|NM_001608|ens|ENST00000233710|ref|XM_005246517|gb|M74096	GO:0090181|GO:0001659|GO:0006635|GO:0016401|GO:0031966|GO:0044242|GO:0050660|GO:0045717|GO:0046322|GO:0044281|GO:0019254|GO:0033539|GO:0004466|GO:0005739|GO:0005737|GO:0051289|GO:0005759|GO:0042758|GO:0003995|GO:0000062|GO:0044255|GO:0055114|GO:0042413	GO:0004466=long-chain-acyl-CoA dehydrogenase activity|GO:0003995=acyl-CoA dehydrogenase activity|GO:0050660=flavin adenine dinucleotide binding|GO:0000062=fatty-acyl-CoA binding|GO:0016401=palmitoyl-CoA oxidase activity	GO:0031966=mitochondrial membrane|GO:0005737=cytoplasm|GO:0005759=mitochondrial matrix|GO:0005739=mitochondrion	GO:0045717=negative regulation of fatty acid biosynthetic process|GO:0042758=long-chain fatty acid catabolic process|GO:0044255=cellular lipid metabolic process|GO:0042413=carnitine catabolic process|GO:0090181=regulation of cholesterol metabolic process|GO:0044281=small molecule metabolic process|GO:0006635=fatty acid beta-oxidation|GO:0033539=fatty acid beta-oxidation using acyl-CoA dehydrogena…	THC2473208	ENST00000233710	Hs.471277	33
ACADM	0.153171	Detected	-0.153171	Detected	0	0.0116966	Detected	-0.238306	Detected	-0.113305	0.624422	330	263	284	206	NM_000016	ref|Homo sapiens acyl-CoA dehydrogenase, C-4 to C-12 straight chain (ACADM), transcript variant 1, mRNA [NM_000016]	acyl-CoA dehydrogenase, C-4 to C-12 straight chain	ref|NM_000016|ref|NM_001286043|ref|NM_001127328|ref|NM_001286042	GO:0030424|GO:0006635|GO:0050660|GO:0005634|GO:0044281|GO:0019254|GO:0033539|GO:0042802|GO:0005739|GO:0005759|GO:0045329|GO:0051793|GO:0003995|GO:0051791|GO:0070991|GO:0044255|GO:0070062|GO:0055114	GO:0042802=identical protein binding|GO:0003995=acyl-CoA dehydrogenase activity|GO:0070991=medium-chain-acyl-CoA dehydrogenase activity|GO:0050660=flavin adenine dinucleotide binding	GO:0005634=nucleus|GO:0070062=extracellular exosome|GO:0005759=mitochondrial matrix|GO:0005739=mitochondrion|GO:0030424=axon	GO:0044255=cellular lipid metabolic process|GO:0045329=carnitine biosynthetic process|GO:0044281=small molecule metabolic process|GO:0006635=fatty acid beta-oxidation|GO:0033539=fatty acid beta-oxidation using acyl-CoA dehydrogenase|GO:0051793=medium-chain fatty acid catabolic process|GO:0019254=carnitine metabolic process, CoA-linked|GO:0051791=medium-chain fatty acid metabolic process|GO:005511…	THC2493080	ENST00000420607	Hs.445040	34
ACADS	0.0438576	Detected	-0.0438576	Detected	0	0.206895	Detected	0.0233121	Detected	0.115104	0.375278	71.6	66.4	76.1	57.8	NM_000017	ref|Homo sapiens acyl-CoA dehydrogenase, C-2 to C-3 short chain (ACADS), transcript variant 1, mRNA [NM_000017]	acyl-CoA dehydrogenase, C-2 to C-3 short chain	ref|NM_000017|ref|NM_001302554|ens|ENST00000242592|gb|AB527081	GO:0006635|GO:0031966|GO:0050660|GO:0004085|GO:0051384|GO:0005634|GO:0044281|GO:0033539|GO:0005739|GO:0042594|GO:0051289|GO:0005759|GO:0003995|GO:0000062|GO:0046359|GO:0044255	GO:0004085=butyryl-CoA dehydrogenase activity|GO:0003995=acyl-CoA dehydrogenase activity|GO:0050660=flavin adenine dinucleotide binding|GO:0000062=fatty-acyl-CoA binding	GO:0005634=nucleus|GO:0031966=mitochondrial membrane|GO:0005759=mitochondrial matrix|GO:0005739=mitochondrion	GO:0042594=response to starvation|GO:0046359=butyrate catabolic process|GO:0044255=cellular lipid metabolic process|GO:0044281=small molecule metabolic process|GO:0006635=fatty acid beta-oxidation|GO:0033539=fatty acid beta-oxidation using acyl-CoA dehydrogenase|GO:0051289=protein homotetramerization|GO:0051384=response to glucocorticoid	NP1199290	ENST00000242592	Hs.507076	35
[truncated: 41,627 more rows]
