# Supplementary material for: Assessing the Link between Diabetic Metabolic Dysregulation and Breast Cancer Progression
Source: Int J Mol Sci. 2023 Jul 23;24(14):11816. doi: 10.3390/ijms241411816 (PMC10380477; doi:10.3390/ijms241411816)
Supplement: Supplementary file 1 [file ijms-24-11816-s001.zip › SO_8409_Complete_data_set2.xlsx]

## Sheet: Read_Me
Genotypic Technology/(SO_8409)QF/LAB/19
Dr. Shivang
				Expression fold values are provided in terms of log base 2 (Formating of color)
This file contains the fold change for all the spots in the array
Complete Data - Set 2
Experiment Details
Set_2
Slide_Id	Sample_details	Group	Analysis_Plan
257236322271_1_1	NG_1	NG	Control
257236322271_1_2	NG_2
257236322271_2_1	HG_1	HG	Test
257236322271_2_2	HG_2
Column Header	Description
GeneName	Unique Gene ID
Fold_NG_1	Fold change calculated as log base 2
Flag_NG_1	Detected/ Compromised
Fold_NG_2	Fold change calculated as log base 2
Flag_NG_2	Detected/ Compromised
GeoMean_NG	Average fold change for the replicate samples
Fold_HG_1	Fold change calculated as log base 2
Flag_HG_1	Detected/ Compromised
Fold_HG_2	Fold change calculated as log base 2
Flag_HG_2	Detected/ Compromised
GeoMean_HG	Average fold change for the replicate samples
P_Value_HG	Student t-test p value
gProcessed_Signal_NG_1	Background subtracted signal intensity
gProcessed_Signal_NG_2	Background subtracted signal intensity
gProcessed_Signal_HG_1	Background subtracted signal intensity
gProcessed_Signal_HG_2	Background subtracted signal intensity
SystematicName	SystematicName
Description_I	Description_I
Description_II	Description_II
Accessions	Accessions
Gene Ontology	Gene Ontology
Molecular Function	Molecular Function
Cellular Component	Cellular Component
Biological Process	Biological Process
TIGRID	TIGRID
EnsemblID	EnsemblID
UniGeneID	UniGeneID
EntrezGeneID	EntrezGeneID

## Sheet: Complete_Data
	Control_NG					Test_HG
GeneName	Fold_NG_1	Flag_NG_1	Fold_NG_2	Flag_NG_2	GeoMean_NG	Fold_HG_1	Flag_HG_1	Fold_HG_2	Flag_HG_2	GeoMean_HG	P_Value_HG	gProcessed_Signal_NG_1	gProcessed_Signal_NG_2	gProcessed_Signal_HG_1	gProcessed_Signal_HG_2	SystematicName	Description_I	Description_II	Accessions	Gene Ontology	Molecular Function	Cellular Component	Biological Process	TIGRID	EnsemblID	UniGeneID	EntrezGeneID
MARCH1	0.00540519	Detected	-0.00540519	Detected	0	-0.322937	Detected	-0.235586	Detected	-0.279262	0.0239462	373.818	365.65	241.634	300.266	NM_017923	ref|Homo sapiens membrane-associated ring finger (C3HC4) 1, E3 ubiquitin protein ligase (MARCH1), transcript variant 2, mRNA [NM_017923]	membrane-associated ring finger (C3HC4) 1, E3 ubiquitin protein ligase	ref|NM_017923|ref|NM_001166373|ens|ENST00000339875|ens|ENST00000503008	GO:0042287|GO:0000209|GO:0004842|GO:0002495|GO:0005886|GO:0016874|GO:0005765|GO:0032588|GO:0005764|GO:0006955|GO:0031901|GO:0031902|GO:0005789|GO:0008270|GO:0016021|GO:0030659|GO:0005768	GO:0008270=zinc ion binding|GO:0042287=MHC protein binding|GO:0004842=ubiquitin-protein transferase activity|GO:0016874=ligase activity	GO:0005886=plasma membrane|GO:0005765=lysosomal membrane|GO:0005764=lysosome|GO:0031901=early endosome membrane|GO:0005789=endoplasmic reticulum membrane|GO:0031902=late endosome membrane|GO:0030659=cytoplasmic vesicle membrane|GO:0005768=endosome|GO:0016021=integral component of membrane|GO:0032588=trans-Golgi network membrane	GO:0000209=protein polyubiquitination|GO:0002495=antigen processing and presentation of peptide antigen via MHC class II|GO:0006955=immune response	THC2483811	ENST00000339875	Hs.592804	55016
Sep1	-0.0439148	Compromised	0.0439153	Compromised	2.375e-07	0.146831	Compromised	-0.104041	Compromised	0.021395	0.886899	1.9	1.99	1.76	1.73	NM_052838	ref|Homo sapiens septin 1 (SEPT1), mRNA [NM_052838]	septin 1	ref|NM_052838|ens|ENST00000566517|ens|ENST00000573615|ens|ENST00000572252	GO:0005515|GO:0007049|GO:0005737|GO:0005815|GO:0030496|GO:0005525|GO:0051301	GO:0005525=GTP binding|GO:0005515=protein binding	GO:0005815=microtubule organizing center|GO:0005737=cytoplasm|GO:0030496=midbody	GO:0051301=cell division|GO:0007049=cell cycle	NP1180451	ENST00000566517	Hs.632176	1731
Dec1	-0.298854	Compromised	0.298854	Compromised	0	-0.074306	Compromised	-1.24043	Compromised	-0.657369	0.421373	3.48	5.19	3.3	1.72	NM_017418	ref|Homo sapiens deleted in esophageal cancer 1 (DEC1), mRNA [NM_017418]	deleted in esophageal cancer 1	ref|NM_017418|ens|ENST00000374016|gb|BC107103|gb|AB022761	GO:0008285			GO:0008285=negative regulation of cell proliferation	THC2483720	ENST00000374016	Hs.148841	50514
MARCH2	0.00194168	Detected	-0.00194168	Detected	0	0.664132	Detected	-0.179861	Detected	0.242136	0.624042	41.0513	40.3476	52.7235	34.3551	NM_016496	ref|Homo sapiens membrane-associated ring finger (C3HC4) 2, E3 ubiquitin protein ligase (MARCH2), transcript variant 1, mRNA [NM_016496]	mitochondrial amidoxime reducing component 2	ref|NM_016496|ref|NM_001005415|ref|NM_001005416|ens|ENST00000381035	GO:0005739|GO:0043546|GO:0051410|GO:0042126|GO:0030170|GO:0008940|GO:0005743|GO:0005741|GO:0070062|GO:0055114|GO:0030151|GO:0005777	GO:0030170=pyridoxal phosphate binding|GO:0030151=molybdenum ion binding|GO:0008940=nitrate reductase activity|GO:0043546=molybdopterin cofactor binding	GO:0005777=peroxisome|GO:0070062=extracellular exosome|GO:0005739=mitochondrion|GO:0005741=mitochondrial outer membrane|GO:0005743=mitochondrial inner membrane	GO:0051410=detoxification of nitrogen compound|GO:0055114=oxidation-reduction process|GO:0042126=nitrate metabolic process	NP303386	ENST00000472447	Hs.369042	54996
SEPT2	0.00604153	Detected	-0.00604153	Detected	0	-0.222445	Detected	-0.230824	Detected	-0.226635	0.00105069	230.613	225.376	159.75	185.769	NM_001008491	ref|Homo sapiens septin 2 (SEPT2), transcript variant 1, mRNA [NM_001008491]	septin 2	ref|NM_001008491|ref|NM_001282973|ref|NM_006155|ref|NM_001282972	GO:0005515|GO:0060170|GO:0048471|GO:0045202|GO:0005634|GO:0015629|GO:0032154|GO:0031175|GO:0007224|GO:0032880|GO:0005737|GO:0000145|GO:0035869|GO:0030234|GO:0005938|GO:0070062|GO:0005819|GO:0005730|GO:0030496|GO:0002036|GO:0005525|GO:0042384|GO:0007067|GO:0032947|GO:0050790|GO:0000777|GO:0005654|GO:0051301	GO:0005525=GTP binding|GO:0032947=protein complex scaffold|GO:0005515=protein binding|GO:0030234=enzyme regulator activity	GO:0032154=cleavage furrow|GO:0000777=condensed chromosome kinetochore|GO:0045202=synapse|GO:0005730=nucleolus|GO:0005654=nucleoplasm|GO:0070062=extracellular exosome|GO:0015629=actin cytoskeleton|GO:0060170=ciliary membrane|GO:0000145=exocyst|GO:0005634=nucleus|GO:0048471=perinuclear region of cytoplasm|GO:0005737=cytoplasm|GO:0005938=cell cortex|GO:0005819=spindle|GO:0035869=ciliary transition …	GO:0051301=cell division|GO:0042384=cilium assembly|GO:0050790=regulation of catalytic activity|GO:0031175=neuron projection development|GO:0032880=regulation of protein localization|GO:0007224=smoothened signaling pathway|GO:0007067=mitotic nuclear division|GO:0002036=regulation of L-glutamate transport	THC2465756	ENST00000391973	Hs.721234	4735
MARCH3	-0.0570855	Detected	0.0570855	Detected	0	-0.0664387	Detected	-0.12132	Detected	-0.0938795	0.276497	63	67.2	50.8	57.2	NM_178450	ref|Homo sapiens membrane-associated ring finger (C3HC4) 3, E3 ubiquitin protein ligase (MARCH3), mRNA [NM_178450]	membrane-associated ring finger (C3HC4) 3, E3 ubiquitin protein ligase	ref|NM_178450|ens|ENST00000308660|gb|AK000103|tc|THC2613510	GO:0016567|GO:0031901|GO:0016874|GO:0008270|GO:0016021|GO:0005764|GO:0030659|GO:0006897|GO:0005768	GO:0008270=zinc ion binding|GO:0016874=ligase activity	GO:0031901=early endosome membrane|GO:0030659=cytoplasmic vesicle membrane|GO:0005768=endosome|GO:0016021=integral component of membrane|GO:0005764=lysosome	GO:0006897=endocytosis|GO:0016567=protein ubiquitination	THC2464429	ENST00000506088	Hs.132441	115123
SEPT3	0.547605	Detected	-0.547605	Compromised	0	-1.25401	Compromised	0.845571	Detected	-0.204219	0.878937	8.74	4.03163	2.03475	10.2	NM_145733	ref|Homo sapiens septin 3 (SEPT3), transcript variant A, mRNA [NM_145733]	septin 3	ref|NM_145733|ens|ENST00000396426|gb|AB463248|gb|CU013459	GO:0003674|GO:0007049|GO:0005737|GO:0030054|GO:0045202|GO:0005856|GO:0005525|GO:0051301	GO:0005525=GTP binding|GO:0003674=molecular_function	GO:0005856=cytoskeleton|GO:0005737=cytoplasm|GO:0030054=cell junction|GO:0045202=synapse	GO:0051301=cell division|GO:0007049=cell cycle	THC2745156	ENST00000396426	Hs.120483	55964
MARCH4	-0.0217147	Compromised	0.0217147	Compromised	0	0.194338	Compromised	-0.0639701	Compromised	0.0651841	0.668022	1.92	1.95	1.81	1.77	NM_020814	ref|Homo sapiens membrane-associated ring finger (C3HC4) 4, E3 ubiquitin protein ligase (MARCH4), mRNA [NM_020814]	membrane-associated ring finger (C3HC4) 4, E3 ubiquitin protein ligase	ref|NM_020814|ens|ENST00000273067|gb|AB037820|gb|BC048793	GO:0005802|GO:0004842|GO:0016567|GO:0005795|GO:0000139|GO:0016874|GO:0008270|GO:0016021	GO:0004842=ubiquitin-protein transferase activity|GO:0008270=zinc ion binding|GO:0016874=ligase activity	GO:0005802=trans-Golgi network|GO:0016021=integral component of membrane|GO:0000139=Golgi membrane|GO:0005795=Golgi stack	GO:0016567=protein ubiquitination	THC2606222	ENST00000273067	Hs.170388	57574
SEPT4	0.0773001	Compromised	-0.0773001	Compromised	0	-0.618988	Compromised	-0.0611124	Compromised	-0.34005	0.361003	5.67	5.02	2.84	4.89	NM_004574	ref|Homo sapiens septin 4 (SEPT4), transcript variant 1, mRNA [NM_004574]	septin 4	ref|NM_004574|ref|NM_001256782|ref|NM_001256822|ref|NM_001198713	GO:0005515|GO:0043065|GO:0097227|GO:0003924|GO:0006915|GO:2001244|GO:0042981|GO:0005634|GO:0005525|GO:0030382|GO:0005739|GO:0007049|GO:0005198|GO:0007420|GO:0008152|GO:0031398|GO:0005856|GO:0048240|GO:0051301	GO:0005198=structural molecule activity|GO:0005525=GTP binding|GO:0005515=protein binding|GO:0003924=GTPase activity	GO:0005634=nucleus|GO:0005856=cytoskeleton|GO:0097227=sperm annulus|GO:0005739=mitochondrion	GO:0030382=sperm mitochondrion organization|GO:0008152=metabolic process|GO:0042981=regulation of apoptotic process|GO:0007420=brain development|GO:0007049=cell cycle|GO:0051301=cell division|GO:0048240=sperm capacitation|GO:0043065=positive regulation of apoptotic process|GO:0006915=apoptotic process|GO:0031398=positive regulation of protein ubiquitination|GO:2001244=positive regulation of intri…	THC2659794	ENST00000412945	Hs.287518	5414
MARCH5	-0.0514278	Detected	0.0514278	Detected	0	-0.569686	Detected	-0.313362	Detected	-0.441524	0.0854701	240	254	136	190	NM_017824	ref|Homo sapiens membrane-associated ring finger (C3HC4) 5 (MARCH5), mRNA [NM_017824]	membrane-associated ring finger (C3HC4) 5	ref|NM_017824|ens|ENST00000358935|ref|XM_005269923|gb|BC015480	GO:0000209|GO:0005515|GO:0004842|GO:0005783|GO:0016874|GO:0090344|GO:0005741|GO:0090141|GO:0090140|GO:0051865|GO:0051020|GO:0016020|GO:0070585|GO:0005789|GO:0008270|GO:0016021	GO:0008270=zinc ion binding|GO:0004842=ubiquitin-protein transferase activity|GO:0005515=protein binding|GO:0051020=GTPase binding|GO:0016874=ligase activity	GO:0005783=endoplasmic reticulum|GO:0005741=mitochondrial outer membrane|GO:0005789=endoplasmic reticulum membrane|GO:0016020=membrane|GO:0016021=integral component of membrane	GO:0090344=negative regulation of cell aging|GO:0000209=protein polyubiquitination|GO:0090140=regulation of mitochondrial fission|GO:0090141=positive regulation of mitochondrial fission|GO:0070585=protein localization to mitochondrion|GO:0051865=protein autoubiquitination	THC2641973	ENST00000358935	Hs.573490	54708
SEPT5	-0.682795	Compromised	0.682795	Compromised	0	-0.805124	Compromised	0.0868931	Compromised	-0.359116	0.702716	2.28	5.79	1.7	3.69	NM_001009939	ref|Homo sapiens septin 5 (SEPT5), transcript variant 2, mRNA [NM_001009939]	septin 5	ref|NM_001009939|ref|NM_002688|ens|ENST00000406172|ens|ENST00000383045	GO:0005515|GO:0016080|GO:0005886|GO:2000300|GO:0003924|GO:0005525|GO:0008021|GO:0000910|GO:0005198|GO:0043195|GO:0008152|GO:0017157|GO:0005856|GO:0005938	GO:0005198=structural molecule activity|GO:0005525=GTP binding|GO:0005515=protein binding|GO:0003924=GTPase activity	GO:0008021=synaptic vesicle|GO:0005886=plasma membrane|GO:0005856=cytoskeleton|GO:0043195=terminal bouton|GO:0005938=cell cortex	GO:0008152=metabolic process|GO:0000910=cytokinesis|GO:0016080=synaptic vesicle targeting|GO:2000300=regulation of synaptic vesicle exocytosis|GO:0017157=regulation of exocytosis	THC2503766	ENST00000406172	Hs.728762	5413
MARCH6	-0.0213263	Detected	0.0213263	Detected	0	0.326368	Detected	0.423636	Detected	0.375002	0.01947	623.014	632.408	643.433	805.076	NM_005885	ref|Homo sapiens membrane-associated ring finger (C3HC4) 6, E3 ubiquitin protein ligase (MARCH6), transcript variant 1, mRNA [NM_005885]	membrane-associated ring finger (C3HC4) 6, E3 ubiquitin protein ligase	ref|NM_005885|ref|NM_001270660|ref|NM_001270661|ens|ENST00000274140	GO:0004842|GO:0016020|GO:0016874|GO:0030176|GO:0008270|GO:0070936|GO:0019899|GO:0031624	GO:0004842=ubiquitin-protein transferase activity|GO:0008270=zinc ion binding|GO:0031624=ubiquitin conjugating enzyme binding|GO:0016874=ligase activity|GO:0019899=enzyme binding	GO:0016020=membrane|GO:0030176=integral component of endoplasmic reticulum membrane	GO:0070936=protein K48-linked ubiquitination	THC2468759	ENST00000274140	Hs.432862	10299
SEPT6	0.118033	Detected	-0.118033	Detected	0	-0.317942	Compromised	0.15566	Detected	-0.0811411	0.788077	11.7	9.79	7.01912	11.4	NM_145802	ref|Homo sapiens septin 6 (SEPT6), transcript variant V, mRNA [NM_145802]	septin 6	ref|NM_145802|ref|NM_145800|ens|ENST00000460411|ens|ENST00000354228	GO:0005515|GO:0000910|GO:0005819|GO:0000777|GO:0030496|GO:0016032|GO:0043679|GO:0005525|GO:0032154|GO:0008021	GO:0005525=GTP binding|GO:0005515=protein binding	GO:0032154=cleavage furrow|GO:0008021=synaptic vesicle|GO:0005819=spindle|GO:0000777=condensed chromosome kinetochore|GO:0030496=midbody|GO:0043679=axon terminus	GO:0016032=viral process|GO:0000910=cytokinesis	NP391544	ENST00000354228	Hs.496666	23157
MARCH7	-0.0380013	Detected	0.0380013	Detected	0	-0.348711	Detected	-0.409389	Detected	-0.37905	0.0160619	541	562	354	397	NM_022826	ref|Homo sapiens membrane-associated ring finger (C3HC4) 7, E3 ubiquitin protein ligase (MARCH7), transcript variant 2, mRNA [NM_022826]	membrane-associated ring finger (C3HC4) 7, E3 ubiquitin protein ligase	ref|NM_022826|ref|NM_001282805|ref|NM_001282807|ref|NM_001282806	GO:0016567|GO:0016874|GO:0008270	GO:0008270=zinc ion binding|GO:0016874=ligase activity		GO:0016567=protein ubiquitination	THC2462640	ENST00000409175	Hs.529272	64844
SEPT7	-0.0373642	Detected	0.0373642	Detected	0	-0.320768	Detected	-0.33634	Detected	-0.328554	0.0132274	886.255	919.844	590.996	683.834	NM_001011553	ref|Homo sapiens septin 7 (SEPT7), transcript variant 2, mRNA [NM_001011553]	septin 7	ref|NM_001011553|ref|NM_001788|ref|NM_001242956|ref|NR_027269	GO:0005515|GO:0005886|GO:0045202|GO:0005634|GO:0015629|GO:0032154|GO:0051291|GO:0042802|GO:0000910|GO:0005737|GO:0016324|GO:0015630|GO:0043679|GO:0005938|GO:0070062|GO:0001725|GO:0005930|GO:0005819|GO:0005730|GO:0030496|GO:0005525|GO:0007067|GO:0005198|GO:0016476|GO:0060271|GO:0000777	GO:0005198=structural molecule activity|GO:0005525=GTP binding|GO:0042802=identical protein binding|GO:0005515=protein binding	GO:0015630=microtubule cytoskeleton|GO:0032154=cleavage furrow|GO:0000777=condensed chromosome kinetochore|GO:0045202=synapse|GO:0005730=nucleolus|GO:0005930=axoneme|GO:0070062=extracellular exosome|GO:0001725=stress fiber|GO:0015629=actin cytoskeleton|GO:0005886=plasma membrane|GO:0043679=axon terminus|GO:0005634=nucleus|GO:0005737=cytoplasm|GO:0005938=cell cortex|GO:0005819=spindle|GO:0030496=m…	GO:0000910=cytokinesis|GO:0051291=protein heterooligomerization|GO:0016476=regulation of embryonic cell shape|GO:0060271=cilium morphogenesis|GO:0007067=mitotic nuclear division	THC2554020	ENST00000425198	Hs.191346	989
MARCH8	0.0761266	Detected	-0.0761266	Detected	0	-0.100041	Detected	-0.209436	Detected	-0.154739	0.240584	29.577	26.229	21.2452	23.0348	NM_001282866	ref|Homo sapiens membrane-associated ring finger (C3HC4) 8, E3 ubiquitin protein ligase (MARCH8), transcript variant 4, mRNA [NM_001282866]	membrane-associated ring finger (C3HC4) 8, E3 ubiquitin protein ligase	ref|NM_001282866|ref|NM_145021|ref|NM_001002266|ens|ENST00000476962	GO:0000209|GO:0004842|GO:0042289|GO:0002495|GO:0016874|GO:0005765|GO:0005764|GO:0031901|GO:0045347|GO:0008270|GO:0016021|GO:0030659|GO:0005768	GO:0008270=zinc ion binding|GO:0042289=MHC class II protein binding|GO:0004842=ubiquitin-protein transferase activity|GO:0016874=ligase activity	GO:0005765=lysosomal membrane|GO:0005764=lysosome|GO:0031901=early endosome membrane|GO:0030659=cytoplasmic vesicle membrane|GO:0005768=endosome|GO:0016021=integral component of membrane	GO:0000209=protein polyubiquitination|GO:0045347=negative regulation of MHC class II biosynthetic process|GO:0002495=antigen processing and presentation of peptide antigen via MHC class II	THC2471858	ENST00000451376	Hs.499489	220972
SEPT8	-0.656005	Detected	0.656005	Detected	0	0.390167	Detected	0.389134	Detected	0.38965	0.612765	58.8133	143.91	98.5698	115.209	NM_001098811	ref|Homo sapiens septin 8 (SEPT8), transcript variant 1, mRNA [NM_001098811]	septin 8	ref|NM_001098811|ens|ENST00000378719|ref|XM_005271931|ref|XM_005271927	GO:0005515|GO:0007049|GO:0005737|GO:0005856|GO:0005525	GO:0005525=GTP binding|GO:0005515=protein binding	GO:0005856=cytoskeleton|GO:0005737=cytoplasm	GO:0007049=cell cycle	THC2530391	ENST00000378719	Hs.522057	23176
MARCH9	-0.0105307	Detected	0.0105307	Detected	0	-0.00953364	Detected	-0.104358	Detected	-0.056946	0.361747	1810	1810	1470	1610	NM_138396	ref|Homo sapiens membrane-associated ring finger (C3HC4) 9 (MARCH9), mRNA [NM_138396]	membrane-associated ring finger (C3HC4) 9	ref|NM_138396|ens|ENST00000548358|ens|ENST00000266643|gb|BC036455	GO:0005802|GO:0016567|GO:0005795|GO:0000139|GO:0016874|GO:0008270|GO:0016021|GO:0005765	GO:0008270=zinc ion binding|GO:0016874=ligase activity	GO:0005802=trans-Golgi network|GO:0016021=integral component of membrane|GO:0000139=Golgi membrane|GO:0005795=Golgi stack|GO:0005765=lysosomal membrane	GO:0016567=protein ubiquitination	THC2478012	ENST00000548358	Hs.632709	92979
SEPT9	-0.00805664	Detected	0.00805616	Detected	-2.385e-07	0.0437169	Detected	0.203318	Detected	0.123518	0.263453	2341.9	2333.88	1970.12	2573.89	NM_006640	ref|Homo sapiens septin 9 (SEPT9), transcript variant 3, mRNA [NM_006640]	septin 9	ref|NM_006640|ref|NM_001113492|ref|NM_001113493|ref|NM_001113494	GO:0005515|GO:0048471|GO:0007049|GO:0005737|GO:0001725|GO:0008152|GO:0005874|GO:0003924|GO:0015629|GO:0005525|GO:0051291|GO:0051301	GO:0005525=GTP binding|GO:0005515=protein binding|GO:0003924=GTPase activity	GO:0048471=perinuclear region of cytoplasm|GO:0005737=cytoplasm|GO:0001725=stress fiber|GO:0015629=actin cytoskeleton|GO:0005874=microtubule	GO:0051301=cell division|GO:0008152=metabolic process|GO:0051291=protein heterooligomerization|GO:0007049=cell cycle	THC2569011	ENST00000329047	Hs.440932	10801
MARCH10	0.305097	Compromised	-0.305097	Compromised	0	0.265231	Compromised	0.986932	Compromised	0.626081	0.316308	2.85	1.84	2.25	4.34	NM_152598	ref|Homo sapiens membrane-associated ring finger (C3HC4) 10, E3 ubiquitin protein ligase (MARCH10), transcript variant 1, mRNA [NM_152598]	membrane-associated ring finger (C3HC4) 10, E3 ubiquitin protein ligase	ref|NM_152598|ref|NM_001100875|ref|NM_001288779|ens|ENST00000311269	GO:0016567|GO:0016874|GO:0008270	GO:0008270=zinc ion binding|GO:0016874=ligase activity		GO:0016567=protein ubiquitination	NP1159821	ENST00000311269	Hs.665663	162333
SEPT10	-0.0049603	Detected	0.0049603	Detected	0	-0.404231	Detected	-0.474873	Detected	-0.439552	0.00652032	1300	1290	800	891	NM_144710	ref|Homo sapiens septin 10 (SEPT10), transcript variant 1, mRNA [NM_144710]	septin 10	ref|NM_144710|ref|NM_178584|ref|NR_047585|ens|ENST00000397712	GO:0007049|GO:0005737|GO:0005856|GO:0005525|GO:0051301	GO:0005525=GTP binding	GO:0005856=cytoskeleton|GO:0005737=cytoplasm	GO:0051301=cell division|GO:0007049=cell cycle	NP1467265	ENST00000397712	Hs.469615	151011
MARCH11	0.328985	Compromised	-0.328985	Compromised	0	-0.0110083	Compromised	-0.394906	Compromised	-0.202957	0.647414	3.01	1.88	1.93	1.73	NM_001102562	ref|Homo sapiens membrane-associated ring finger (C3HC4) 11 (MARCH11), mRNA [NM_001102562]	membrane-associated ring finger (C3HC4) 11	ref|NM_001102562|ens|ENST00000332432|gb|BC150514|gb|BC150513	GO:0016567|GO:0016874|GO:0008270|GO:0016021|GO:0030659	GO:0008270=zinc ion binding|GO:0016874=ligase activity	GO:0030659=cytoplasmic vesicle membrane|GO:0016021=integral component of membrane	GO:0016567=protein ubiquitination	THC2754016	ENST00000332432	Hs.662216	441061
SEPT11	-0.0124989	Detected	0.0124993	Detected	2.38e-07	-0.0772805	Detected	-0.0352445	Detected	-0.0562625	0.148069	3660	3670	2840	3420	NM_018243	ref|Homo sapiens septin 11 (SEPT11), mRNA [NM_018243]	septin 11	ref|NM_018243|ens|ENST00000264893|ref|XM_005263120|ref|XM_006714259	GO:0005515|GO:0030424|GO:0007049|GO:0005737|GO:0001725|GO:0030054|GO:0043197|GO:0045202|GO:0005525|GO:0051291|GO:0070062|GO:0051301	GO:0005525=GTP binding|GO:0005515=protein binding	GO:0070062=extracellular exosome|GO:0005737=cytoplasm|GO:0001725=stress fiber|GO:0043197=dendritic spine|GO:0030054=cell junction|GO:0045202=synapse|GO:0030424=axon	GO:0051301=cell division|GO:0051291=protein heterooligomerization|GO:0007049=cell cycle	THC2545449	ENST00000264893	Hs.128199	55752
SEPT12	-0.205168	Detected	0.205168	Detected	1.2e-07	-0.40586	Compromised	0.876303	Detected	0.235221	0.760114	11.3	14.8	7.98	22.7	NM_144605	ref|Homo sapiens septin 12 (SEPT12), transcript variant 2, mRNA [NM_144605]	septin 12	ref|NM_144605|ref|NM_001154458|ens|ENST00000587603|ens|ENST00000268231	GO:0005515|GO:0031105|GO:0001725|GO:0048471|GO:0097227|GO:0005819|GO:0030496|GO:0005525|GO:0032154|GO:0042803|GO:0007049|GO:0015630|GO:0019003|GO:0035091|GO:0051301	GO:0042803=protein homodimerization activity|GO:0035091=phosphatidylinositol binding|GO:0005525=GTP binding|GO:0005515=protein binding|GO:0019003=GDP binding	GO:0015630=microtubule cytoskeleton|GO:0032154=cleavage furrow|GO:0048471=perinuclear region of cytoplasm|GO:0097227=sperm annulus|GO:0001725=stress fiber|GO:0005819=spindle|GO:0030496=midbody|GO:0031105=septin complex	GO:0007049=cell cycle|GO:0051301=cell division	NP1153851	ENST00000587603	Hs.126780	124404
SEPT14	0.00154805	Detected	-0.00154805	Detected	0	-0.0179055	Detected	0.202893	Detected	0.0924935	0.490343	53.173	52.2901	42.5769	58.0356	NM_207366	ref|Homo sapiens septin 14 (SEPT14), mRNA [NM_207366]	septin 14	ref|NM_207366|ens|ENST00000388975|gb|AK126048|tc|THC2479910	GO:0005515|GO:0007049|GO:0005737|GO:0005856|GO:0005525|GO:0051301	GO:0005525=GTP binding|GO:0005515=protein binding	GO:0005856=cytoskeleton|GO:0005737=cytoplasm	GO:0051301=cell division|GO:0007049=cell cycle	THC2546252	ENST00000413839	Hs.453629	346288
SEPT15	0.000564575	Detected	-0.000565052	Detected	-2.38415e-07	0.145133	Detected	0.00571203	Detected	0.0754223	0.39239	4992.88	4916.66	4479.29	4756.55	NM_004261	ref|Homo sapiens 15 kDa selenoprotein (SEP15), transcript variant 1, mRNA [NM_004261]	15 kDa selenoprotein	ref|NM_004261|ref|NM_203341|ens|ENST00000616787|ens|ENST00000611507	GO:0008430|GO:0051084|GO:0005788|GO:0070062	GO:0008430=selenium binding	GO:0005788=endoplasmic reticulum lumen|GO:0070062=extracellular exosome	GO:0051084='de novo' posttranslational protein folding	THC2470152	ENST00000616787	Hs.362728	9403
A_19_P00325768	0.0113297	Detected	-0.0113301	Detected	-2.385e-07	-0.0256696	Detected	0.0328107	Detected	0.00357056	0.919741	6030	5850	4770	5810	A_19_P00325768	Unknown
A_19_P00800244	-0.139393	Detected	0.139393	Detected	0	-0.0941219	Detected	-0.193078	Detected	-0.1436	0.434041	36.3	43.4	30.4	33.2	A_19_P00800244	Unknown
A_19_P00802027	0.0500622	Detected	-0.0500622	Detected	0	0.0950203	Detected	-0.0464706	Detected	0.0242748	0.805718	63300	58200	53000	56200	A_19_P00802027	Unknown
A_19_P00803499	-0.00521994	Detected	0.00521994	Detected	0	-0.220136	Detected	0.0341692	Detected	-0.0929835	0.540989	40.9	40.6	28.6	39.9	A_19_P00803499	Unknown
A_19_P00803675	-0.0489092	Compromised	0.0489092	Compromised	0	0.171189	Compromised	-0.0632429	Compromised	0.053973	0.712227	1.83	1.93	1.73	1.72	A_19_P00803675	Unknown
A_19_P00804070	0.0839429	Compromised	-0.0839429	Compromised	0	-0.589201	Compromised	0.563242	Compromised	-0.012979	0.984241	3.34	2.93	1.7	4.42	A_19_P00804070	Unknown
A_19_P00804120	-0.133611	Compromised	0.133611	Compromised	-2.35e-07	-0.49494	Compromised	-0.67742	Compromised	-0.58618	0.068452	2.58	3.06	1.63	1.68	A_19_P00804120	Unknown
A_19_P00804924	-0.08286	Compromised	0.0828595	Compromised	-2.37e-07	-0.363838	Compromised	-0.598368	Compromised	-0.481103	0.0787014	2.56	2.83	1.71	1.7	A_19_P00804924	Unknown
A_19_P00805651	-0.0244474	Detected	0.024447	Detected	-2.385e-07	0.243555	Detected	0.150189	Detected	0.196872	0.0647647	3080	3140	3010	3300	A_19_P00805651	Unknown
A_19_P00806158	-0.0292683	Detected	0.0292678	Detected	-2.385e-07	-0.00161123	Detected	0.0146518	Detected	0.00652027	0.849934	6080	6240	5030	5950	A_19_P00806158	Unknown
A_19_P00808758	0.106523	Detected	-0.106523	Detected	-2.4e-07	0.00276518	Detected	0.0377145	Detected	0.0202398	0.868567	9480	8060	7160	8580	A_19_P00808758	Unknown
A_19_P00808923	0.135993	Detected	-0.135993	Detected	-2.4e-07	0.292214	Detected	0.0184484	Detected	0.155331	0.505299	13600	11100	12300	11900	A_19_P00808923	Unknown
A_19_P00811234	-0.0540423	Detected	0.0540423	Detected	0	0.0725231	Detected	-0.0478358	Detected	0.0123436	0.892711	193	205	171	184	A_19_P00811234	Unknown
A_19_P00812701	0.0351536	Detected	-0.0351536	Detected	0	-0.51487	Detected	-0.618028	Detected	-0.566449	0.0119259	99.4	93.3	55.1	60	A_19_P00812701	Unknown
A_21_P0000465	-0.534547	Compromised	0.534547	Compromised	-2.25e-07	-0.271445	Compromised	-0.497514	Compromised	-0.38448	0.554512	1.92	3.97	1.87	1.87	A_21_P0000465	Unknown
A_21_P0000467	-0.0405912	Compromised	0.0405912	Compromised	0	0.181723	Compromised	-0.0688677	Compromised	0.0564277	0.710063	1.88	1.96	1.78	1.75	A_21_P0000467	Unknown
A_21_P0000480	-0.0516443	Detected	0.0516443	Detected	0	0.0598998	Detected	0.109675	Detected	0.0847876	0.277245	68.2	72.2	59.8	72.4	A_21_P0000480	Unknown
A_21_P0000520	0.0386012	Detected	-0.0386012	Detected	0	-0.192724	Detected	-0.200085	Detected	-0.196404	0.0368384	48.6	45.4	33.6	39.1	A_21_P0000520	Unknown
A_21_P0000564	-0.347364	Compromised	0.347364	Compromised	0	-0.171085	Compromised	-0.0999937	Compromised	-0.13554	0.735313	2.05	3.27	1.88	2.31	A_21_P0000564	Unknown
A_21_P0013913	0.111248	Detected	-0.111248	Detected	0	-0.319886	Detected	0.114559	Detected	-0.102664	0.714892	20.6	17.4	12.4	19.6	A_21_P0013913	Unknown
A_21_P0013928	-0.243012	Detected	0.243012	Detected	0	0.111351	Detected	0.373504	Detected	0.242428	0.472538	21.3	29.4	22.1	31	A_21_P0013928	Unknown
A_21_P0013937	-0.172748	Detected	0.172748	Detected	0	-0.197432	Detected	0.0139651	Detected	-0.0917335	0.694972	46	57.6	36.7	49.7	A_21_P0013937	Unknown
A_21_P0013942	0.20309	Compromised	-0.20309	Compromised	0	-0.15005	Compromised	-0.417698	Compromised	-0.283874	0.363475	2.77	2.06	1.76	1.71	A_21_P0013942	Unknown
A_21_P0013943	-0.0510669	Compromised	0.0510664	Compromised	-2.375e-07	0.207792	Compromised	-0.0355544	Compromised	0.0861189	0.580982	1.73	1.83	1.68	1.66	A_21_P0013943	Unknown
A_21_P0013948	-0.298461	Detected	0.298461	Detected	-1.2e-07	-0.355978	Detected	0.0487199	Detected	-0.153629	0.711543	15.9	23.7	12.4	19.2	A_21_P0013948	Unknown
A_21_P0013949	0.393147	Compromised	-0.393147	Compromised	0	-0.28637	Compromised	0.0362606	Compromised	-0.125055	0.796279	3.71	2.12	1.88	2.75	A_21_P0013949	Unknown
A_21_P0013954	-0.247066	Compromised	0.247066	Compromised	0	-0.0971017	Compromised	-0.380073	Compromised	-0.238587	0.49022	2.01	2.79	1.81	1.74	A_21_P0013954	Unknown
A_21_P0013957	0.549055	Compromised	-0.549056	Compromised	-2.5e-07	-0.429883	Compromised	-0.585989	Compromised	-0.507936	0.456405	3.91	1.8	1.61	1.69	A_21_P0013957	Unknown
A_21_P0013959	-0.0220113	Compromised	0.0220113	Compromised	0	0.150117	Compromised	-0.042593	Compromised	0.053762	0.641011	1.87	1.9	1.71	1.75	A_21_P0013959	Unknown
A_21_P0013962	-0.051527	Compromised	0.0515275	Compromised	2.385e-07	0.17164	Compromised	0.00660133	Compromised	0.0891209	0.456334	1.71	1.81	1.62	1.69	A_21_P0013962	Unknown
A_21_P0013972	-0.0565901	Compromised	0.0565896	Compromised	-2.385e-07	0.179729	Compromised	-0.0714307	Compromised	0.0541489	0.732176	1.82	1.94	1.74	1.71	A_21_P0013972	Unknown
A_21_P0013988	0.360787	Compromised	-0.360786	Compromised	2.3e-07	0.113032	Compromised	0.16195	Compromised	0.137491	0.740368	8.5	5.08	5.81	7.03	A_21_P0013988	Unknown
A_21_P0013990	0.813637	Detected	-0.813636	Compromised	2.5e-07	-0.533528	Compromised	0.323904	Compromised	-0.104812	0.919674	12.1	3.86	3.86	8.18	A_21_P0013990	Unknown
A_21_P0013992	-0.893053	Compromised	0.893053	Compromised	2.25e-07	1.39345	Compromised	0.596044	Compromised	0.994746	0.41612	1.73	5.88	6.85	4.61	A_21_P0013992	Unknown
A_21_P0013994	0.21393	Detected	-0.21393	Detected	0	-0.580423	Detected	-0.397909	Detected	-0.489166	0.170155	35.9	26.3	16.8	22.3	A_21_P0013994	Unknown
A_21_P0013999	0.655072	Detected	-0.655072	Compromised	0	-0.441635	Compromised	-1.24489	Compromised	-0.843262	0.386932	19.5	7.75	7.4	4.96	A_21_P0013999	Unknown
A_21_P0014005	-0.0493221	Compromised	0.0493226	Compromised	2.375e-07	0.616188	Compromised	1.43583	Compromised	1.02601	0.130833	1.81	1.91	2.33	4.81	A_21_P0014005	Unknown
A_21_P0014013	-0.10451	Detected	0.10451	Detected	0	0.128735	Detected	0.251099	Detected	0.189917	0.257364	84.8	96.6	80.9	103	A_21_P0014013	Unknown
A_21_P0014023	-0.0294085	Detected	0.029408	Detected	-2.385e-07	0.49883	Detected	0.655934	Detected	0.577382	0.020458	2640	2710	3090	4030	A_21_P0014023	Unknown
A_21_P0014027	-0.0495319	Compromised	0.0495319	Compromised	0	0.177638	Compromised	-0.0316553	Compromised	0.0729911	0.592833	1.8	1.9	1.71	1.73	A_21_P0014027	Unknown
A_21_P0014037	-0.246183	Compromised	0.246183	Compromised	0	-0.546464	Compromised	-0.145803	Compromised	-0.346133	0.389343	3.96	5.49	2.61	4.03	A_21_P0014037	Unknown
A_21_P0014040	0.0161221	Detected	-0.0161221	Detected	0	-0.343906	Detected	-0.0576398	Detected	-0.200773	0.29803	102	98.3	64.5	92	A_21_P0014040	Unknown
A_21_P0014050	0.514548	Compromised	-0.514548	Compromised	0	-0.392504	Compromised	-0.657047	Compromised	-0.524776	0.427389	4.39	2.12	1.9	1.85	A_21_P0014050	Unknown
A_21_P0014052	-0.0327277	Compromised	0.0327277	Compromised	0	0.167295	Compromised	-0.0996456	Compromised	0.0338249	0.828534	1.92	1.98	1.79	1.74	A_21_P0014052	Unknown
A_21_P0014064	-0.0487061	Compromised	0.0487061	Compromised	0	0.365526	Compromised	0.146689	Compromised	0.256108	0.165912	1.84	1.94	1.99	2	A_21_P0014064	Unknown
A_21_P0014068	-0.0573177	Compromised	0.0573177	Compromised	0	0.167501	Compromised	-0.0902762	Compromised	0.0386126	0.809968	1.94	2.07	1.84	1.8	A_21_P0014068	Unknown
A_21_P0014095	-0.0439148	Compromised	0.0439153	Compromised	2.375e-07	0.241988	Compromised	0.242691	Compromised	0.242339	0.0313063	1.9	1.99	1.88	2.2	A_21_P0014095	Unknown
A_21_P0014104	-0.0495319	Compromised	0.0495319	Compromised	0	0.160665	Compromised	-0.0484309	Compromised	0.0561168	0.675557	1.8	1.9	1.69	1.71	A_21_P0014104	Unknown
A_21_P0014121	-0.0512953	Compromised	0.0512958	Compromised	2.385e-07	0.172338	Compromised	0.0238061	Compromised	0.0980721	0.390746	1.72	1.82	1.63	1.72	A_21_P0014121	Unknown
A_21_P0014122	-0.0369568	Detected	0.0369565	Detected	-1.185e-07	0.474248	Detected	-0.22059	Detected	0.126829	0.751371	13.4	13.9	15.5	11.2	A_21_P0014122	Unknown
A_21_P0014126	-0.245976	Detected	0.245976	Detected	0	-0.391115	Detected	-0.284947	Detected	-0.338031	0.311301	34.2	47.4	25.1	31.6	A_21_P0014126	Unknown
A_21_P0014154	-0.0501752	Compromised	0.0501752	Compromised	0	0.912672	Compromised	-0.0503621	Compromised	0.431155	0.46712	1.77	1.87	2.8	1.68	A_21_P0014154	Unknown
A_21_P0014163	-0.051527	Compromised	0.0515275	Compromised	2.385e-07	0.17164	Compromised	0.0151129	Compromised	0.0933766	0.423994	1.71	1.81	1.62	1.7	A_21_P0014163	Unknown
A_21_P0014169	-0.224865	Compromised	0.224866	Compromised	2.35e-07	-1.3695	Compromised	0.523735	Compromised	-0.42288	0.706228	4.74	6.38	1.74	7.56	A_21_P0014169	Unknown
A_21_P0014178	-0.0463076	Compromised	0.0463071	Compromised	-2.385e-07	0.179574	Compromised	1.54703	Compromised	0.863302	0.334847	1.77	1.86	1.68	5.07	A_21_P0014178	Unknown
A_21_P0014192	0.0382273	Detected	-0.0382273	Detected	0	0.126404	Detected	-0.014776	Detected	0.0558138	0.558804	153	143	132	140	A_21_P0014192	Unknown
A_21_P0014193	0.332732	Compromised	-0.332732	Compromised	1.2e-07	-0.487802	Compromised	-0.0611529	Compromised	-0.274477	0.559224	8.9	5.53	4.09	6.43	A_21_P0014193	Unknown
A_21_P0014203	0.104078	Detected	-0.104078	Compromised	1.18e-07	0.550853	Detected	-0.0894835	Detected	0.230685	0.563965	11.3	9.64	12.5	9.38	A_21_P0014203	Unknown
A_21_P0014212	0.14075	Compromised	-0.14075	Compromised	0	0.756029	Detected	-0.591503	Compromised	0.0822632	0.91579	7.77	6.3	9.66	4.44	A_21_P0014212	Unknown
A_21_P0014213	-0.139197	Detected	0.139197	Detected	0	0.783461	Detected	0.483392	Detected	0.633427	0.0904537	16.9	20.2	26	24.7	A_21_P0014213	Unknown
A_21_P0014219	-0.0193455	Detected	0.0193455	Detected	0	-0.304617	Detected	-0.263957	Detected	-0.284287	0.00960464	48.8	49.4	32.5	39.1	A_21_P0014219	Unknown
A_21_P0014240	-0.476974	Compromised	0.476974	Compromised	0	-0.212703	Compromised	-0.515529	Compromised	-0.364116	0.542504	1.98	3.78	1.93	1.83	A_21_P0014240	Unknown
A_21_P0014255	-0.357906	Detected	0.357906	Detected	0	-1.51399	Compromised	-0.40164	Detected	-0.957814	0.284548	21.5	34.8	7.83	19.8	A_21_P0014255	Unknown
A_21_P0014259	-0.222435	Detected	0.222435	Detected	0	0.31613	Detected	0.60015	Detected	0.45814	0.224694	24.6	33	29	41.3	A_21_P0014259	Unknown
A_21_P0014263	-0.0481095	Compromised	0.0481095	Compromised	0	0.198019	Compromised	-0.0769591	Compromised	0.06053	0.718082	1.87	1.97	1.8	1.74	A_21_P0014263	Unknown
A_21_P0014264	-0.0568552	Compromised	0.0568552	Compromised	0	0.168764	Compromised	-0.0966182	Compromised	0.0360727	0.826001	1.96	2.09	1.86	1.81	A_21_P0014264	Unknown
A_21_P0014265	-0.0326147	Compromised	0.0326142	Compromised	-2.39e-07	0.159914	Compromised	-0.107027	Compromised	0.0264435	0.865152	1.93	1.99	1.79	1.74	A_21_P0014265	Unknown
A_21_P0014294	0.620987	Detected	-0.620986	Compromised	1.2e-07	-0.00854492	Compromised	-0.631577	Compromised	-0.320061	0.690263	12.6	5.25	6.61	5.02	A_21_P0014294	Unknown
A_21_P0014305	-0.0467873	Compromised	0.0467868	Compromised	-2.385e-07	0.185851	Compromised	-0.0638042	Compromised	0.0610235	0.692042	1.94	2.04	1.85	1.82	A_21_P0014305	Unknown
A_21_P0014320	0.457044	Compromised	-0.457044	Compromised	-2.35e-07	0.703287	Compromised	-0.509919	Compromised	0.096684	0.910349	3.48	1.82	3.35	1.69	A_21_P0014320	Unknown
A_21_P0014324	0.0619271	Detected	-0.0619271	Detected	0	0.0888293	Detected	0.0841167	Detected	0.086473	0.297654	72.2	65.3	59.7	69.6	A_21_P0014324	Unknown
A_21_P0014345	0.0276155	Detected	-0.0276155	Detected	0	0.227436	Detected	0.295814	Detected	0.261625	0.027078	79.6	75.5	74.2	91	A_21_P0014345	Unknown
A_21_P0014374	-0.044796	Compromised	0.0447965	Compromised	2.385e-07	1.39033	Compromised	0.206283	Compromised	0.798306	0.310957	1.85	1.94	4.06	2.09	A_21_P0014374	Unknown
A_21_P0014382	-0.209723	Compromised	0.209724	Compromised	2.4e-07	-0.370056	Compromised	-0.284	Compromised	-0.327028	0.266203	6.1	8.04	4.43	5.5	A_21_P0014382	Unknown
A_21_P0014384	-0.0542622	Compromised	0.0542622	Compromised	0	0.179793	Compromised	-0.00396442	Compromised	0.0879145	0.496613	1.76	1.87	1.68	1.73	A_21_P0014384	Unknown
A_21_P0014386	0.455113	Compromised	-0.455113	Compromised	0	0.256712	Compromised	0.0483022	Compromised	0.152507	0.774952	5.74	3.01	4.06	4.11	A_21_P0014386	Unknown
A_21_P0014391	0.104947	Detected	-0.104946	Detected	1.175e-07	-0.174584	Detected	0.599348	Detected	0.212382	0.64924	16.9	14.4	11.3	22.6	A_21_P0014391	Unknown
A_21_P0014394	0.138293	Detected	-0.138293	Compromised	0	-0.261171	Compromised	0.106958	Detected	-0.0771065	0.769554	9.28	7.55	5.71	8.62	A_21_P0014394	Unknown
A_21_P0014413	-0.541463	Compromised	0.541463	Compromised	0	-0.380775	Compromised	-0.135538	Compromised	-0.258156	0.687646	1.94	4.05	1.76	2.44	A_21_P0014413	Unknown
A_21_P0014414	-0.446071	Compromised	0.446071	Compromised	0	0.802976	Compromised	0.283643	Compromised	0.54331	0.402919	3.1	5.67	5.98	4.88	A_21_P0014414	Unknown
A_21_P0014417	-0.0451617	Compromised	0.0451622	Compromised	2.38e-07	0.174936	Compromised	-0.0345492	Compromised	0.0701935	0.600997	1.83	1.92	1.73	1.75	A_21_P0014417	Unknown
A_21_P0014418	-0.377493	Compromised	0.377493	Compromised	2.4e-07	-0.146333	Compromised	-0.388432	Compromised	-0.267382	0.569522	1.9	3.16	1.81	1.79	A_21_P0014418	Unknown
A_21_P0014420	0.00258517	Detected	-0.00258517	Detected	0	-0.0378022	Compromised	0.225785	Detected	0.0939914	0.549795	11.1	10.9	8.76	12.3	A_21_P0014420	Unknown
A_21_P0014433	-0.457342	Compromised	0.457342	Detected	0	-0.556523	Compromised	0.731981	Detected	0.087729	0.921725	6.19	11.5	4.69	13.4	A_21_P0014433	Unknown
A_21_P0014438	-0.121158	Compromised	0.121157	Compromised	-2.38e-07	0.131378	Compromised	1.66842	Compromised	0.899897	0.3669	1.81	2.11	1.75	5.94	A_21_P0014438	Unknown
A_21_P0014447	0.962939	Compromised	-0.962939	Compromised	0	-0.843766	Compromised	-0.7787	Compromised	-0.811233	0.488435	6.94	1.8	1.61	1.97	A_21_P0014447	Unknown
A_21_P0014457	-0.0473423	Compromised	0.0473418	Compromised	-2.38e-07	0.168252	Compromised	1.64262	Compromised	0.905437	0.345052	1.91	2.01	1.8	5.85	A_21_P0014457	Unknown
A_21_P0014467	-0.0639882	Compromised	0.0639882	Compromised	0	0.202624	Compromised	0.00255108	Compromised	0.102588	0.478705	1.69	1.82	1.65	1.68	A_21_P0014467	Unknown
A_21_P0014468	-0.123803	Compromised	0.123803	Compromised	2.4e-07	0.823383	Compromised	1.49265	Detected	1.15801	0.0832502	3.47	4.06	5.43	10.1	A_21_P0014468	Unknown
A_21_P0014484	-0.242751	Compromised	0.24275	Compromised	-2.35e-07	0.0857511	Compromised	-1.29103	Compromised	-0.60264	0.495835	3.66	5.05	3.73	1.68	A_21_P0014484	Unknown
A_21_P0014492	-0.0209854	Detected	0.0209854	Detected	0	0.321705	Detected	0.0956361	Detected	0.20867	0.211174	1370	1390	1410	1410	A_21_P0014492	Unknown
A_21_P0014500	-0.0597324	Compromised	0.0597324	Compromised	0	0.207086	Compromised	0.488621	Compromised	0.347853	0.150741	1.7	1.82	1.66	2.36	A_21_P0014500	Unknown
A_21_P0014506	-0.0357175	Compromised	0.0357175	Compromised	0	0.119134	Compromised	-0.156403	Compromised	-0.0186346	0.907812	1.97	2.04	1.78	1.72	A_21_P0014506	Unknown
A_21_P0014523	-0.0537848	Compromised	0.0537853	Compromised	2.385e-07	1.05705	Compromised	-0.0450258	Compromised	0.506014	0.457223	1.78	1.89	3.12	1.7	A_21_P0014523	Unknown
A_21_P0014524	-0.0526371	Compromised	0.0526371	Compromised	0	0.175776	Compromised	-0.0669708	Compromised	0.0544026	0.720788	1.83	1.94	1.74	1.72	A_21_P0014524	Unknown
A_21_P0014532	-1.60841	Compromised	1.60841	Detected	2e-07	-1.44901	Compromised	-1.74743	Compromised	-1.59822	0.426744	2.03	18.6	1.84	1.75	A_21_P0014532	Unknown
A_21_P0014540	-0.0479145	Compromised	0.0479145	Compromised	0	0.166272	Compromised	-0.0927739	Compromised	0.0367491	0.815082	1.88	1.98	1.77	1.73	A_21_P0014540	Unknown
A_21_P0014541	-0.840591	Compromised	0.840591	Compromised	2.25e-07	1.82956	Detected	-0.861172	Compromised	0.484196	0.789034	1.87	5.91	9.66	1.75	A_21_P0014541	Unknown
A_21_P0014546	0.0153003	Compromised	-0.0153003	Compromised	0	0.147451	Compromised	-0.0950117	Compromised	0.0262198	0.849988	1.99	1.92	1.77	1.75	A_21_P0014546	Unknown
A_21_P0014581	-0.836569	Compromised	0.836569	Compromised	-1e-07	0.735248	Compromised	0.265754	Compromised	0.500501	0.622777	3.15	9.9	7.6	6.42	A_21_P0014581	Unknown
A_21_P0014590	-0.412795	Compromised	0.412796	Compromised	2.35e-07	-1.70899	Compromised	-1.42423	Compromised	-1.56661	0.0696688	5.84	10.2	1.93	2.75	A_21_P0014590	Unknown
A_21_P0014605	0.815165	Compromised	-0.815164	Compromised	2.35e-07	-0.694632	Compromised	-0.0858874	Compromised	-0.39026	0.697697	6	1.91	1.71	3.05	A_21_P0014605	Unknown
A_21_P0014607	0.240344	Detected	-0.240344	Detected	0	-1.11935	Compromised	-1.52428	Compromised	-1.32181	0.0521421	16	11.3	5.06	4.47	A_21_P0014607	Unknown
A_21_P0014610	0.539771	Compromised	-0.539772	Compromised	-2.3e-07	-0.420599	Compromised	-0.576705	Compromised	-0.498652	0.457071	3.86	1.8	1.61	1.69	A_21_P0014610	Unknown
A_21_P0014613	-0.0593362	Compromised	0.0593362	Compromised	0	0.190434	Compromised	-0.088932	Compromised	0.0507512	0.769883	2	2.14	1.93	1.86	A_21_P0014613	Unknown
A_21_P0014614	0.646524	Compromised	-0.646524	Compromised	0	-0.956958	Compromised	-1.0547	Compromised	-1.00583	0.260989	6.44	2.59	1.72	1.88	A_21_P0014614	Unknown
A_21_P0014630	-0.0453482	Compromised	0.0453477	Compromised	-2.385e-07	0.19097	Compromised	-0.0350981	Compromised	0.0779362	0.58775	1.82	1.91	1.74	1.74	A_21_P0014630	Unknown
A_21_P0014634	0.193057	Compromised	-0.193057	Compromised	0	-0.0356312	Compromised	-0.253188	Compromised	-0.14441	0.581486	2.44	1.84	1.69	1.7	A_21_P0014634	Unknown
A_21_P0014654	-0.0586386	Compromised	0.0586381	Compromised	-2.385e-07	0.208979	Compromised	-0.0341635	Compromised	0.0874076	0.583659	1.74	1.86	1.7	1.68	A_21_P0014654	Unknown
A_21_P0014656	0.0385809	Compromised	-0.0385814	Compromised	-2.38e-07	0.336684	Compromised	0.606964	Compromised	0.471824	0.0784273	4.71	4.4	4.7	6.63	A_21_P0014656	Unknown
A_21_P0014667	-0.0444384	Compromised	0.0444388	Compromised	2.39e-07	2.20569	Compromised	0.755232	Compromised	1.48046	0.178489	1.87	1.96	7.22	3.09	A_21_P0014667	Unknown
A_21_P0014673	-0.0105305	Compromised	0.0105309	Compromised	2.385e-07	0.19753	Compromised	-0.0967097	Compromised	0.0504103	0.765094	2.08	2.08	1.95	1.86	A_21_P0014673	Unknown
A_21_P0014680	-0.0442624	Compromised	0.0442619	Compromised	-2.39e-07	0.178052	Compromised	-0.0808067	Compromised	0.0486226	0.756234	1.88	1.97	1.78	1.74	A_21_P0014680	Unknown
A_21_P0014690	0.00481796	Compromised	-0.00481749	Compromised	2.383e-07	0.858035	Detected	-0.708577	Compromised	0.0747293	0.932695	6.65	6.51	9.75	3.85	A_21_P0014690	Unknown
A_21_P0014692	0.0668304	Detected	-0.0668306	Detected	-1.175e-07	0.226824	Detected	-0.0402718	Detected	0.0932763	0.595988	11.8	10.6	10.7	10.4	A_21_P0014692	Unknown
A_21_P0014698	-0.499844	Compromised	0.499844	Compromised	2.35e-07	1.69495	Compromised	0.131651	Compromised	0.913303	0.428714	2.04	4.02	7.58	3	A_21_P0014698	Unknown
A_21_P0014717	-0.358851	Detected	0.358851	Detected	0	-0.26242	Compromised	0.33216	Detected	0.03487	0.947162	9.07	14.7	7.87	13.9	A_21_P0014717	Unknown
A_21_P0014731	1.23376	Detected	-1.23376	Compromised	-2e-07	-1.09263	Compromised	0.0759363	Compromised	-0.508345	0.745366	11	1.96	1.78	4.68	A_21_P0014731	Unknown
A_21_P0014734	-0.488469	Compromised	0.48847	Compromised	2.4e-07	-0.816384	Compromised	0.620984	Compromised	-0.0977003	0.920748	2.49	4.83	1.61	5.1	A_21_P0014734	Unknown
A_21_P0014743	-0.366629	Compromised	0.36663	Compromised	2.4e-07	-0.128195	Compromised	0.617408	Compromised	0.244606	0.685945	1.88	3.08	1.8	3.53	A_21_P0014743	Unknown
A_21_P0014748	0.0811598	Detected	-0.0811598	Detected	0	-0.233577	Detected	-0.0534313	Detected	-0.143504	0.358188	37.7	33.2	24.6	32.6	A_21_P0014748	Unknown
A_21_P0014749	-0.042429	Detected	0.042429	Detected	0	0.270206	Detected	0.58922	Detected	0.429713	0.121274	37.6	39.3	37.9	55.3	A_21_P0014749	Unknown
A_21_P0014750	0.303013	Compromised	-0.303013	Compromised	0	0.915695	Compromised	-0.348509	Compromised	0.283593	0.72496	2.78	1.8	3.45	1.68	A_21_P0014750	Unknown
A_21_P0014751	0.112382	Detected	-0.112382	Detected	0	-0.48435	Detected	0.13359	Detected	-0.17538	0.647075	30	25.3	16.1	28.9	A_21_P0014751	Unknown
A_21_P0014752	-0.0497441	Compromised	0.0497437	Compromised	-2.39e-07	0.177001	Compromised	0.000973225	Compromised	0.0889871	0.47159	1.79	1.89	1.7	1.76	A_21_P0014752	Unknown
A_21_P0014754	0.287197	Compromised	-0.287197	Compromised	0	0.327421	Compromised	0.144545	Compromised	0.235983	0.515644	8.28	5.48	6.91	7.12	A_21_P0014754	Unknown
A_21_P0014755	-0.607442	Detected	0.607442	Detected	0	-1.07021	Detected	0.117162	Detected	-0.476522	0.631253	15.3	35	9.01	24	A_21_P0014755	Unknown
A_21_P0014758	0.0933595	Compromised	-0.0933595	Compromised	0	-1.67448	Compromised	-0.54565	Compromised	-1.11006	0.191863	8.35	7.23	1.99	5.09	A_21_P0014758	Unknown
A_21_P0014763	-0.456151	Compromised	0.456151	Compromised	-1.25e-07	-0.624928	Compromised	0.22176	Compromised	-0.201584	0.776737	4.82	8.94	3.48	7.32	A_21_P0014763	Unknown
A_21_P0014766	-0.171002	Detected	0.171002	Detected	0	0.00687289	Detected	-0.00988698	Detected	-0.00150704	0.993776	29.3	36.6	26.9	31.1	A_21_P0014766	Unknown
A_21_P0014769	-0.0732966	Compromised	0.0732961	Compromised	-2.4e-07	0.190974	Compromised	1.27633	Compromised	0.733652	0.312265	1.98	2.16	1.93	4.79	A_21_P0014769	Unknown
A_21_P0014770	0.223779	Compromised	-0.223779	Compromised	0	-0.100012	Compromised	0.0997801	Compromised	-0.00011611	0.999665	2.56	1.85	1.66	2.23	A_21_P0014770	Unknown
A_21_P0014771	-0.0527976	Detected	0.0527976	Detected	0	0.118312	Detected	0.383492	Detected	0.250902	0.220813	116	123	106	149	A_21_P0014771	Unknown
A_21_P0014772	-0.0557385	Compromised	0.0557385	Compromised	0	0.186837	Compromised	-0.0925298	Compromised	0.0471535	0.783553	2.01	2.14	1.93	1.86	A_21_P0014772	Unknown
A_21_P0014774	-0.455198	Compromised	0.455197	Compromised	-2.35e-07	-0.624918	Compromised	-0.876522	Compromised	-0.75072	0.252873	2.37	4.39	1.71	1.68	A_21_P0014774	Unknown
A_21_P0014777	0.0850568	Compromised	-0.0850573	Compromised	-2.4e-07	-0.958519	Compromised	-0.660117	Compromised	-0.809318	0.0422017	7.01	6.14	2.76	3.97	A_21_P0014777	Unknown
A_21_P0014780	-0.280044	Compromised	0.280044	Compromised	-2.4e-07	0.203329	Compromised	-0.177462	Compromised	0.0129335	0.973003	4.68	6.8	5.31	4.77	A_21_P0014780	Unknown
A_21_P0014787	0.0127406	Compromised	-0.0127406	Compromised	0	1.33663	Compromised	1.43549	Compromised	1.38606	0.00135358	1.89	1.83	3.84	4.81	A_21_P0014787	Unknown
A_21_P0014790	0.152908	Detected	-0.152908	Detected	0	-0.193489	Detected	-0.113819	Detected	-0.153654	0.433412	36.5	29.1	23.3	28.8	A_21_P0014790	Unknown
A_21_P0014792	-0.185106	Detected	0.185106	Detected	0	-0.00946665	Detected	0.361864	Detected	0.176199	0.570779	16.8	21.4	15.4	23.3	A_21_P0014792	Unknown
A_21_P0014799	-0.0784724	Detected	0.0784724	Detected	0	0.490178	Detected	0.336259	Detected	0.413219	0.0640304	16.2	17.8	19.5	20.5	A_21_P0014799	Unknown
A_21_P0014808	0.149314	Detected	-0.149314	Detected	0	0.363693	Detected	-0.019038	Detected	0.172328	0.551339	805	645	758	680	A_21_P0014808	Unknown
A_21_P0014811	0.545574	Compromised	-0.545574	Compromised	2.5e-07	-0.0924005	Compromised	-0.780255	Compromised	-0.436328	0.568448	4.41	2.04	2.3	1.67	A_21_P0014811	Unknown
A_21_P0014819	0.267229	Detected	-0.267229	Detected	0	-1.82597	Compromised	-1.23078	Compromised	-1.52837	0.0621655	19.4	13.2	3.69	6.52	A_21_P0014819	Unknown
A_21_P0014821	-0.278907	Compromised	0.278907	Compromised	0	0.916909	Compromised	-0.399357	Compromised	0.258776	0.752003	2.13	3.09	3.96	1.86	A_21_P0014821	Unknown
A_21_P0014826	0.0766516	Compromised	-0.0766511	Compromised	2.35e-07	-0.512599	Compromised	-0.018405	Compromised	-0.265502	0.412681	7.73	6.85	4.17	6.87	A_21_P0014826	Unknown
A_21_P0014828	-0.823571	Compromised	0.823571	Compromised	0	0.702092	Compromised	0.537687	Compromised	0.61989	0.531984	1.96	6.05	4.58	4.78	A_21_P0014828	Unknown
A_21_P0014834	-0.180776	Detected	0.180776	Detected	0	-0.103729	Detected	-0.341972	Detected	-0.222851	0.411514	27.8	35.2	23.8	23.6	A_21_P0014834	Unknown
A_21_P0014845	-0.857738	Compromised	0.857738	Compromised	0	-0.698341	Compromised	-0.98854	Compromised	-0.843441	0.434547	2.03	6.57	1.84	1.76	A_21_P0014845	Unknown
A_21_P0014849	-0.106853	Detected	0.106853	Detected	0	-0.0990427	Detected	-0.186506	Detected	-0.142774	0.341744	87.5	100	71.4	78.6	A_21_P0014849	Unknown
A_21_P0014850	0.0441318	Compromised	-0.0441318	Compromised	0	0.235977	Compromised	-1.08525	Compromised	-0.424636	0.586978	5.07	4.7	4.7	2.2	A_21_P0014850	Unknown
A_21_P0014854	0.346374	Compromised	-0.346373	Compromised	2.4e-07	-0.3722	Compromised	0.0166726	Compromised	-0.177764	0.698297	5.15	3.14	2.54	3.89	A_21_P0014854	Unknown
A_21_P0014855	0.269391	Detected	-0.269392	Compromised	-1.2e-07	-1.03674	Compromised	-0.0689621	Compromised	-0.552853	0.423326	9.11	6.18	2.99	6.84	A_21_P0014855	Unknown
A_21_P0014859	-0.250192	Compromised	0.250192	Compromised	2.35e-07	-0.213478	Compromised	-0.153926	Compromised	-0.183702	0.541763	2.03	2.83	1.69	2.06	A_21_P0014859	Unknown
A_21_P0014862	-0.0181744	Detected	0.0181744	Detected	0	0.284916	Detected	0.418643	Detected	0.35178	0.0366756	751	759	752	965	A_21_P0014862	Unknown
A_21_P0014864	-0.0267696	Detected	0.0267696	Detected	0	0.0624971	Detected	0.266025	Detected	0.164261	0.258902	57.1	58.4	49.3	66.4	A_21_P0014864	Unknown
A_21_P0014867	-0.529665	Compromised	0.529665	Compromised	0	-0.316443	Compromised	0.368221	Compromised	0.0258887	0.970986	1.86	3.82	1.75	3.29	A_21_P0014867	Unknown
A_21_P0014875	0.156546	Compromised	-0.156547	Compromised	-2.4e-07	-0.0387096	Compromised	-0.230831	Compromised	-0.13477	0.539451	2.37	1.88	1.68	1.72	A_21_P0014875	Unknown
A_21_P0014876	0.0760658	Detected	-0.0760658	Detected	0	-0.230758	Detected	-0.16913	Detected	-0.199944	0.135151	221	196	145	177	A_21_P0014876	Unknown
A_21_P0014877	-0.214066	Detected	0.214066	Detected	0	0.363843	Detected	0.724484	Detected	0.544163	0.191315	22.7	30.1	27.5	41.3	A_21_P0014877	Unknown
A_21_P0014880	0.00119901	Detected	-0.00119901	Detected	0	-0.0469654	Detected	-0.354334	Detected	-0.20065	0.321684	186	183	146	138	A_21_P0014880	Unknown
A_21_P0014882	-0.00696874	Detected	0.00696874	Detected	0	-0.50077	Detected	-0.0894086	Detected	-0.295089	0.288029	20.3	20.2	11.7	18.2	A_21_P0014882	Unknown
A_21_P0014893	-0.355361	Compromised	0.355361	Detected	0	0.133058	Detected	0.0330245	Detected	0.0830411	0.838523	8.37	13.5	9.53	10.4	A_21_P0014893	Unknown
A_21_P0014894	-0.0330746	Detected	0.0330746	Detected	0	0.606719	Detected	0.518703	Detected	0.562711	0.00943586	18.9	19.5	23.9	26.3	A_21_P0014894	Unknown
A_21_P0014897	-0.0832777	Compromised	0.0832782	Compromised	2.4e-07	-0.531497	Compromised	-0.250028	Compromised	-0.390762	0.13942	3.11	3.44	1.85	2.63	A_21_P0014897	Unknown
A_21_P0014903	-0.0837736	Detected	0.0837736	Detected	0	1.06356	Detected	0.337283	Detected	0.70042	0.200946	26.2	29	47.1	33.3	A_21_P0014903	Unknown
A_21_P0014905	-0.308336	Compromised	0.308336	Compromised	0	-0.0811663	Compromised	-0.265656	Compromised	-0.173411	0.643967	1.8	2.72	1.71	1.76	A_21_P0014905	Unknown
A_21_P0014907	-0.276728	Compromised	0.276728	Compromised	0	-0.0508461	Compromised	0.407584	Compromised	0.178369	0.668806	1.77	2.56	1.68	2.7	A_21_P0014907	Unknown
A_21_P0014911	-0.0383675	Detected	0.0383675	Detected	0	0.327549	Detected	0.184947	Detected	0.256248	0.0870083	305	317	319	338	A_21_P0014911	Unknown
A_21_P0014912	-0.627763	Compromised	0.627763	Detected	0	-0.108711	Compromised	0.0491741	Detected	-0.0297686	0.966749	5.95	14	6.92	9.03	A_21_P0014912	Unknown
A_21_P0014925	-0.0517616	Compromised	0.0517616	Compromised	0	0.906107	Compromised	0.625176	Compromised	0.765641	0.0361672	1.7	1.8	2.68	2.58	A_21_P0014925	Unknown
A_21_P0014931	-0.051527	Compromised	0.0515275	Compromised	2.385e-07	0.17164	Compromised	0.0235744	Compromised	0.0976074	0.392313	1.71	1.81	1.62	1.71	A_21_P0014931	Unknown
A_21_P0014936	0.221253	Compromised	-0.221253	Compromised	-2.4e-07	-0.0847354	Compromised	0.859121	Compromised	0.387193	0.534971	2.62	1.9	1.72	3.87	A_21_P0014936	Unknown
A_21_P0014946	-0.268578	Compromised	0.268579	Compromised	2.4e-07	-0.404179	Compromised	0.402861	Compromised	-0.00065923	0.999038	3.79	5.42	2.8	5.73	A_21_P0014946	Unknown
A_22_P00005983	-0.527416	Compromised	0.527416	Compromised	-2.25e-07	-0.328496	Compromised	-0.587543	Compromised	-0.458019	0.487813	1.9	3.89	1.77	1.73	A_22_P00005983	Unknown
A_23_P90470	-0.0457253	Detected	0.0457253	Detected	0	0.588868	Detected	0.418943	Detected	0.503906	0.0347624	100	105	126	131	A_23_P90470	Unknown
A_24_P229726	-0.138396	Compromised	0.138395	Compromised	-2.4e-07	1.16714	Compromised	-1.0373	Compromised	0.0649199	0.958711	3.3	3.94	6.62	1.68	A_24_P229726	Unknown
A_24_P246636	-0.0512953	Compromised	0.0512958	Compromised	2.385e-07	0.172338	Compromised	-0.00157928	Compromised	0.0853794	0.486781	1.72	1.82	1.63	1.69	A_24_P246636	Unknown
A_24_P280926	0.00532341	Detected	-0.00532389	Detected	-2.385e-07	-0.191744	Detected	-0.133282	Detected	-0.162513	0.0318383	13800	13500	9770	11900	A_24_P280926	Unknown
A_24_P32766	0.0183268	Detected	-0.0183272	Detected	-2.38e-07	0.00462294	Detected	-0.111392	Detected	-0.0533843	0.472743	20400	19600	16400	17700	A_24_P32766	Unknown
A_24_P504621	-0.0487061	Compromised	0.0487061	Compromised	0	0.717587	Compromised	1.21019	Compromised	0.963889	0.061642	1.84	1.94	2.54	4.18	A_24_P504621	Unknown
A_24_P613108	-0.0473213	Compromised	0.0473208	Compromised	-2.385e-07	0.202623	Compromised	-0.00616741	Compromised	0.0982277	0.481746	1.72	1.81	1.66	1.68	A_24_P613108	Unknown
A_24_P662366	0.0538895	Detected	-0.0538895	Detected	0	-0.0266883	Detected	-0.0863464	Detected	-0.0565174	0.455705	71.4	65.3	54.8	61.5	A_24_P662366	Unknown
A_24_P704878	0.105845	Compromised	-0.105845	Compromised	2.375e-07	-0.969676	Compromised	-1.12198	Compromised	-1.04583	0.0151916	7.92	6.74	3.05	3.21	A_24_P704878	Unknown
A_24_P818268	0.0389271	Detected	-0.0389268	Detected	1.2e-07	-0.116079	Detected	0.293578	Detected	0.0887492	0.711781	16.6	15.5	12.1	18.8	A_24_P818268	Unknown
A_24_P833256	-0.0479145	Compromised	0.0479145	Compromised	0	0.166272	Compromised	-0.0844588	Compromised	0.0409067	0.789314	1.88	1.98	1.77	1.74	A_24_P833256	Unknown
A_24_P935506	-0.475336	Compromised	0.475336	Compromised	0	-0.36137	Compromised	-0.561598	Compromised	-0.461484	0.442375	1.89	3.6	1.66	1.69	A_24_P935506	Unknown
A_32_P10100	0.0616646	Detected	-0.0616651	Detected	-2.39e-07	0.0366054	Detected	-0.0171475	Detected	0.00972891	0.898259	16800	15200	13400	15100	A_32_P10100	Unknown
A_32_P102252	-0.00627446	Detected	0.00627446	Detected	0	-0.569145	Detected	-0.37478	Detected	-0.471963	0.0400366	1700	1690	934	1250	A_32_P102252	Unknown
A_32_P113154	0.116319	Detected	-0.116318	Detected	2.37e-07	0.322262	Detected	0.0233817	Detected	0.172822	0.457789	9550	8010	8940	8500	A_32_P113154	Unknown
A_32_P125549	0.13385	Detected	-0.13385	Detected	2.4e-07	0.532317	Detected	0.0381875	Detected	0.285252	0.416859	21500	17600	23000	19100	A_32_P125549	Unknown
A_32_P152696	0.0377283	Detected	-0.0377278	Detected	2.385e-07	-0.0505958	Detected	-0.042582	Detected	-0.0465889	0.344366	9890	9250	7550	8880	A_32_P152696	Unknown
A_32_P153979	-0.0322814	Compromised	0.0322814	Compromised	0	0.129912	Compromised	-0.145625	Compromised	-0.00785661	0.960769	1.96	2.02	1.78	1.72	A_32_P153979	Unknown
A_32_P185628	0.486122	Detected	-0.486122	Compromised	0	-1.02426	Compromised	-1.75234	Compromised	-1.3883	0.149586	8.6	4.32	2.45	1.73	A_32_P185628	Unknown
A_32_P230825	0.0270205	Detected	-0.02702	Detected	2.38e-07	0.114484	Detected	0.0852971	Detected	0.0998907	0.0829265	6900	6550	5950	6820	A_32_P230825	Unknown
A_32_P48615	-0.143788	Detected	0.143788	Detected	0	0.152145	Detected	0.526692	Detected	0.339419	0.287128	27.6	33.2	27.5	41.7	A_32_P48615	Unknown
A_32_P53558	0.0469773	Detected	-0.0469773	Detected	0	0.184427	Detected	-0.0540779	Detected	0.0651748	0.661647	261	241	233	231	A_32_P53558	Unknown
A_32_P79115	-0.053504	Detected	0.053504	Detected	0	-0.290562	Detected	-0.351129	Detected	-0.320845	0.0348114	89.6	95.1	61.7	69.2	A_32_P79115	Unknown
A_32_P88905	0.0763419	Detected	-0.0763419	Detected	0	-0.322929	Detected	-0.109374	Detected	-0.216151	0.241365	520	461	320	434	A_32_P88905	Unknown
A_33_P3209135	-1.09462	Compromised	1.09462	Compromised	2.5e-07	-0.857582	Compromised	-1.10014	Compromised	-0.97886	0.467883	1.84	8.27	1.76	1.74	A_33_P3209135	Unknown
A_33_P3209185	0.202709	Compromised	-0.202709	Compromised	0	-1.31837	Compromised	-0.189048	Compromised	-0.753708	0.335866	6.33	4.71	1.79	4.58	A_33_P3209185	Unknown
A_33_P3209209	-0.0481095	Compromised	0.0481095	Compromised	0	0.648681	Compromised	-0.0852742	Compromised	0.281703	0.526084	1.87	1.97	2.46	1.73	A_33_P3209209	Unknown
A_33_P3209566	-0.0578489	Compromised	0.0578489	Compromised	0	0.193568	Compromised	-0.0494738	Compromised	0.072047	0.645987	1.77	1.89	1.71	1.69	A_33_P3209566	Unknown
A_33_P3209696	-1.16927	Compromised	1.16927	Compromised	2.5e-07	0.812281	Compromised	0.337419	Compromised	0.57485	0.677518	1.95	9.72	6.25	5.26	A_33_P3209696	Unknown
A_33_P3209703	-0.457658	Compromised	0.457659	Compromised	1.15e-07	0.482246	Compromised	-0.288306	Compromised	0.0969697	0.886129	4.74	8.81	7.38	5.06	A_33_P3209703	Unknown
A_33_P3209756	0.0108588	Detected	-0.0108588	Detected	0	0.0547302	Detected	0.175112	Detected	0.114921	0.201023	75.3	73.1	63	80.1	A_33_P3209756	Unknown
A_33_P3209924	-0.0177803	Compromised	0.0177808	Compromised	2.38e-07	0.0886612	Compromised	-0.171156	Compromised	-0.0412474	0.782866	1.98	2	1.73	1.69	A_33_P3209924	Unknown
A_33_P3210069	0.0896566	Detected	-0.0896566	Detected	0	0.150636	Detected	0.36279	Detected	0.256713	0.205808	80.2	69.8	67.9	92	A_33_P3210069	Unknown
A_33_P3210516	0.196988	Detected	-0.196988	Detected	0	-0.439107	Detected	0.0656383	Detected	-0.186734	0.618721	18	13.5	9.4	15.6	A_33_P3210516	Unknown
A_33_P3210561	0.0958729	Detected	-0.0958734	Detected	-2.38e-07	-0.0768895	Detected	-0.0707841	Detected	-0.0738368	0.521929	17500	15100	12600	14800	A_33_P3210561	Unknown
A_33_P3210605	-0.255323	Compromised	0.255323	Compromised	0	-0.115904	Compromised	-0.391726	Compromised	-0.253815	0.473998	1.98	2.78	1.77	1.71	A_33_P3210605	Unknown
A_33_P3210969	-0.107881	Detected	0.107881	Detected	0	-0.322068	Detected	0.159522	Detected	-0.0812731	0.787187	52.6	60.2	36.8	60.1	A_33_P3210969	Unknown
A_33_P3210975	0.570733	Compromised	-0.570733	Compromised	0	-0.816453	Compromised	0.405807	Compromised	-0.205323	0.828933	5.35	2.39	1.66	4.53	A_33_P3210975	Unknown
A_33_P3211018	-0.0732966	Compromised	0.0732961	Compromised	-2.4e-07	0.190974	Compromised	-0.0729628	Compromised	0.0590055	0.733596	1.98	2.16	1.93	1.88	A_33_P3211018	Unknown
A_33_P3211098	0.0670547	Compromised	-0.0670543	Compromised	2.4e-07	-0.470312	Compromised	0.142156	Compromised	-0.164078	0.652912	3.04	2.73	1.7	3.04	A_33_P3211098	Unknown
A_33_P3211223	-0.493893	Detected	0.493893	Detected	0	-1.53595	Compromised	-0.595192	Compromised	-1.06557	0.258627	9.21	18	3.63	8.15	A_33_P3211223	Unknown
A_33_P3211478	-0.14775	Compromised	0.14775	Compromised	0	0.619083	Compromised	1.0988	Compromised	0.858942	0.0928332	2.1	2.54	2.9	4.73	A_33_P3211478	Unknown
A_33_P3211854	-0.0907626	Compromised	0.0907631	Compromised	2.375e-07	0.167338	Compromised	-0.0327349	Compromised	0.0673017	0.667702	1.7	1.9	1.65	1.68	A_33_P3211854	Unknown
A_33_P3211862	-0.0540223	Compromised	0.0540223	Compromised	0	0.171859	Compromised	-0.0371356	Compromised	0.0673618	0.624688	1.77	1.88	1.68	1.7	A_33_P3211862	Unknown
A_33_P3212052	-0.725683	Compromised	0.725683	Detected	1.3e-07	-2.23315	Compromised	-0.296277	Compromised	-1.26471	0.405685	5.64	15.2	1.61	7.21	A_33_P3212052	Unknown
A_33_P3212316	-0.297442	Detected	0.297442	Detected	0	0.205362	Detected	-0.115425	Detected	0.0449684	0.906319	26	38.7	29.9	28	A_33_P3212316	Unknown
A_33_P3212700	-0.000671387	Detected	0.000671387	Detected	0	0.326377	Detected	0.548622	Detected	0.4375	0.0588757	22.1	21.8	22.5	30.7	A_33_P3212700	Unknown
A_33_P3212704	-0.0763104	Detected	0.0763104	Detected	0	-0.329616	Detected	0.146801	Detected	-0.0914078	0.749815	39.8	43.6	27.1	44.1	A_33_P3212704	Unknown
A_33_P3213134	0.0242999	Detected	-0.0242999	Detected	0	0.140898	Detected	-0.222122	Detected	-0.0406125	0.845079	891	849	784	713	A_33_P3213134	Unknown
A_33_P3213311	-0.0547495	Compromised	0.0547495	Compromised	0	0.169799	Compromised	0.00367308	Compromised	0.086736	0.475214	1.74	1.85	1.65	1.72	A_33_P3213311	Unknown
A_33_P3213317	0.180636	Detected	-0.180636	Detected	-1.2e-07	-0.672744	Detected	-0.187564	Detected	-0.430154	0.290903	18.9	14.5	8.49	13.9	A_33_P3213317	Unknown
A_33_P3213518	-0.24736	Compromised	0.24736	Compromised	0	-0.074832	Compromised	-0.331115	Compromised	-0.202974	0.542011	2.11	2.93	1.93	1.89	A_33_P3213518	Unknown
A_33_P3213526	0.808042	Compromised	-0.808042	Compromised	0	-0.687929	Compromised	-0.86153	Compromised	-0.77473	0.441053	5.63	1.81	1.62	1.68	A_33_P3213526	Unknown
A_33_P3213712	-0.0823658	Detected	0.0823658	Detected	0	-0.281809	Detected	0.0519316	Detected	-0.114939	0.599763	19.1	21.1	13.5	19.9	A_33_P3213712	Unknown
A_33_P3213992	-0.651316	Compromised	0.651316	Compromised	2.35e-07	0.27914	Compromised	0.297608	Compromised	0.288374	0.701252	4.06	9.87	6.28	7.44	A_33_P3213992	Unknown
A_33_P3214076	0.37971	Compromised	-0.37971	Compromised	0	-0.260066	Compromised	-0.565423	Compromised	-0.412744	0.419383	3.59	2.09	1.87	1.77	A_33_P3214076	Unknown
A_33_P3214179	0.0323997	Detected	-0.0323997	Detected	0	-0.251393	Detected	-0.288428	Detected	-0.26991	0.0185847	22.5	21.2	15	17.1	A_33_P3214179	Unknown
A_33_P3214284	-0.0223885	Compromised	0.0223889	Compromised	2.385e-07	0.216341	Compromised	-1.09546	Compromised	-0.439558	0.571976	5.43	5.52	5.2	2.45	A_33_P3214284	Unknown
A_33_P3214750	-0.0555019	Compromised	0.0555015	Compromised	-2.39e-07	0.202855	Compromised	0.194204	Compromised	0.198529	0.0704254	1.71	1.82	1.66	1.93	A_33_P3214750	Unknown
A_33_P3214782	-1.5915	Compromised	1.5915	Detected	0	-1.02862	Compromised	-0.787423	Compromised	-0.908022	0.626784	1.81	16.2	2.17	3	A_33_P3214782	Unknown
A_33_P3215232	-0.923805	Compromised	0.923805	Compromised	2.4e-07	-0.362107	Compromised	-0.152895	Compromised	-0.257501	0.807804	1.92	6.81	2.3	3.11	A_33_P3215232	Unknown
A_33_P3215363	0.252934	Detected	-0.252935	Detected	-1.2e-07	-0.0840435	Detected	0.0693016	Detected	-0.00737095	0.980284	13.4	9.3	8.61	11.2	A_33_P3215363	Unknown
A_33_P3215527	-0.35427	Compromised	0.35427	Compromised	0	-0.113042	Compromised	1.14944	Compromised	0.518197	0.548363	1.72	2.77	1.65	4.63	A_33_P3215527	Unknown
A_33_P3215565	0.0902863	Compromised	-0.0902863	Compromised	0	-0.123117	Compromised	-0.279223	Compromised	-0.20117	0.233921	2.3	2	1.61	1.69	A_33_P3215565	Unknown
A_33_P3215611	-0.0663147	Compromised	0.0663152	Compromised	2.37e-07	0.198143	Compromised	-0.0809431	Compromised	0.0586002	0.740957	1.99	2.15	1.94	1.87	A_33_P3215611	Unknown
A_33_P3215729	-0.0294647	Compromised	0.0294647	Compromised	0	0.160059	Compromised	0.491047	Compromised	0.325553	0.192396	1.88	1.93	1.74	2.56	A_33_P3215729	Unknown
A_33_P3216200	0.0834954	Detected	-0.0834956	Compromised	-1.2e-07	-2.09251	Compromised	-0.0312035	Compromised	-1.06185	0.41243	9.41	8.26	1.69	8.25	A_33_P3216200	Unknown
A_33_P3216487	0.0888591	Detected	-0.0888591	Detected	0	-0.578883	Detected	-0.318327	Detected	-0.448605	0.104549	101	88	51.6	72.3	A_33_P3216487	Unknown
A_33_P3216621	0.239807	Compromised	-0.239807	Compromised	0	-1.73288	Compromised	-0.406967	Compromised	-1.06993	0.268406	8.56	6.05	1.77	5.19	A_33_P3216621	Unknown
A_33_P3216635	-0.0613737	Compromised	0.0613739	Compromised	1.2e-07	-2.06356	Compromised	-1.169	Compromised	-1.61628	0.0699376	8.49	9.11	1.72	3.74	A_33_P3216635	Unknown
A_33_P3216640	-0.0499587	Compromised	0.0499582	Compromised	-2.38e-07	0.797845	Compromised	0.928788	Compromised	0.863317	0.00897757	1.78	1.88	2.6	3.33	A_33_P3216640	Unknown
A_33_P3217507	-0.0433245	Compromised	0.0433249	Compromised	2.385e-07	0.197903	Compromised	-0.0107837	Compromised	0.0935595	0.494698	1.72	1.8	1.65	1.67	A_33_P3217507	Unknown
A_33_P3217629	-0.0444384	Compromised	0.0444388	Compromised	2.39e-07	0.302294	Compromised	0.347955	Compromised	0.325124	0.0228081	1.87	1.96	1.93	2.33	A_33_P3217629	Unknown
A_33_P3217867	-0.0552483	Compromised	0.0552483	Compromised	0	0.203361	Compromised	0.00297928	Compromised	0.10317	0.462373	1.72	1.83	1.67	1.7	A_33_P3217867	Unknown
A_33_P3218013	-0.0763836	Detected	0.0763836	Detected	0	0.0199666	Detected	-0.482895	Detected	-0.231464	0.471316	13.6	14.9	11.8	9.74	A_33_P3218013	Unknown
A_33_P3218118	0.0197399	Detected	-0.0197399	Detected	0	0.0644486	Detected	0.0682476	Detected	0.0663481	0.0789082	65.7	63	55	64.5	A_33_P3218118	Unknown
A_33_P3218258	-0.0246749	Compromised	0.0246754	Compromised	2.39e-07	0.203246	Compromised	-0.0920849	Compromised	0.0555806	0.746092	2.02	2.06	1.92	1.83	A_33_P3218258	Unknown
A_33_P3218309	0.62694	Compromised	-0.62694	Compromised	-2.25e-07	-0.0201292	Compromised	-0.663355	Compromised	-0.341742	0.675599	4.38	1.81	2.27	1.7	A_33_P3218309	Unknown
A_33_P3218491	-0.67677	Compromised	0.676769	Compromised	-2.35e-07	-0.668051	Compromised	-0.943588	Compromised	-0.805819	0.363608	2.18	5.49	1.78	1.72	A_33_P3218491	Unknown
A_33_P3218504	-0.171012	Compromised	0.171012	Compromised	-2.4e-07	-1.50888	Compromised	0.359567	Compromised	-0.574657	0.606646	5.98	7.47	1.92	8.2	A_33_P3218504	Unknown
A_33_P3218564	0.125779	Detected	-0.125779	Detected	2.35e-07	0.142741	Detected	-0.192033	Detected	-0.0246463	0.917051	15100	12500	12400	11500	A_33_P3218564	Unknown
A_33_P3218741	0.0108967	Detected	-0.0108972	Detected	-2.385e-07	0.217549	Detected	0.0358758	Detected	0.126712	0.300305	20500	19900	19200	19800	A_33_P3218741	Unknown
A_33_P3218910	0.227336	Compromised	-0.227336	Compromised	0	-0.0403371	Compromised	-0.315315	Compromised	-0.177826	0.572207	2.67	1.92	1.8	1.74	A_33_P3218910	Unknown
A_33_P3219138	0.225726	Compromised	-0.225726	Compromised	0	0.879164	Detected	1.83104	Detected	1.3551	0.123684	7.34	5.29	9.37	21.2	A_33_P3219138	Unknown
A_33_P3219210	-0.396826	Compromised	0.396825	Compromised	-2.5e-07	-0.422602	Compromised	-0.747488	Compromised	-0.585045	0.305677	3.6	6.15	2.87	2.68	A_33_P3219210	Unknown
A_33_P3219286	0.0574305	Detected	-0.0574305	Detected	0	-0.0522249	Detected	-0.104168	Detected	-0.0781965	0.340537	45.6	41.5	34.3	38.7	A_33_P3219286	Unknown
A_33_P3219454	0.0299292	Detected	-0.0299296	Detected	-2.385e-07	-0.240808	Detected	-0.206009	Detected	-0.223409	0.023181	16500	15600	11100	13300	A_33_P3219454	Unknown
A_33_P3219505	-0.0508399	Compromised	0.0508399	Compromised	0	0.79038	Compromised	1.08911	Compromised	0.939746	0.0270511	1.74	1.84	2.53	3.64	A_33_P3219505	Unknown
A_33_P3220213	-0.0105309	Compromised	0.0105305	Compromised	-2.385e-07	1.12802	Compromised	-0.0736656	Compromised	0.527177	0.472865	1.97	1.97	3.52	1.79	A_33_P3220213	Unknown
A_33_P3220395	-0.0473213	Compromised	0.0473208	Compromised	-2.385e-07	0.193906	Compromised	0.0444584	Compromised	0.119182	0.310177	1.72	1.81	1.65	1.74	A_33_P3220395	Unknown
A_33_P3220406	0.618368	Compromised	-0.618368	Compromised	0	-0.478117	Compromised	-0.644947	Compromised	-0.561532	0.463132	4.4	1.84	1.67	1.74	A_33_P3220406	Unknown
A_33_P3220678	0.480304	Compromised	-0.480303	Compromised	2.3e-07	-0.353818	Compromised	-0.470657	Compromised	-0.412238	0.483956	3.91	1.98	1.78	1.92	A_33_P3220678	Unknown
A_33_P3220748	0.846961	Compromised	-0.846961	Compromised	0	-0.795121	Compromised	-1.06301	Compromised	-0.929065	0.391835	6.73	2.05	1.75	1.7	A_33_P3220748	Unknown
A_33_P3220780	0.736093	Compromised	-0.736093	Compromised	0	-0.587229	Compromised	-0.796224	Compromised	-0.691726	0.450386	5.18	1.84	1.68	1.7	A_33_P3220780	Unknown
A_33_P3220847	-0.0405912	Compromised	0.0405912	Compromised	0	0.181723	Compromised	-0.0771356	Compromised	0.0522938	0.736994	1.88	1.96	1.78	1.74	A_33_P3220847	Unknown
A_33_P3220979	-0.0469089	Compromised	0.0469089	Compromised	0	0.186357	Compromised	0.0364599	Compromised	0.111408	0.334769	1.74	1.83	1.66	1.75	A_33_P3220979	Unknown
A_33_P3220994	0.167865	Detected	-0.167866	Detected	-1.15e-07	-0.663291	Compromised	0.168113	Detected	-0.247589	0.636242	17.8	13.9	8.12	16.9	A_33_P3220994	Unknown
A_33_P3221040	0.890252	Compromised	-0.890252	Compromised	0	-0.774181	Compromised	-1.03078	Compromised	-0.902483	0.421354	7.46	2.14	1.91	1.87	A_33_P3221040	Unknown
A_33_P3221059	-0.661812	Compromised	0.661812	Compromised	0	-0.434643	Compromised	-0.610958	Compromised	-0.5228	0.515605	1.8	4.44	1.71	1.77	A_33_P3221059	Unknown
A_33_P3221134	-0.0249581	Compromised	0.0249581	Compromised	0	0.0897985	Compromised	-0.178334	Compromised	-0.0442677	0.77628	1.98	2.02	1.74	1.69	A_33_P3221134	Unknown
A_33_P3221318	-0.279328	Compromised	0.279328	Compromised	0	-1.51365	Compromised	-1.52895	Compromised	-1.5213	0.0321216	5.16	7.49	1.78	2.06	A_33_P3221318	Unknown
A_33_P3221384	-0.239676	Detected	0.239676	Detected	0	-0.0560756	Detected	-0.222162	Detected	-0.139119	0.638422	23	31.6	21.2	22.1	A_33_P3221384	Unknown
A_33_P3221793	-0.20796	Detected	0.20796	Detected	0	-0.0994356	Detected	0.24668	Detected	0.073622	0.811047	21.6	28.4	18.9	28.1	A_33_P3221793	Unknown
A_33_P3221888	-0.0992723	Compromised	0.099272	Compromised	-1.2e-07	-0.396241	Compromised	0.0623653	Compromised	-0.166938	0.57285	8.25	9.33	5.45	8.76	A_33_P3221888	Unknown
A_33_P3221925	-0.0105305	Compromised	0.0105309	Compromised	2.385e-07	2.02316	Compromised	0.676409	Compromised	1.34978	0.182925	1.95	1.95	6.48	2.98	A_33_P3221925	Unknown
A_33_P3221978	0.00145864	Detected	-0.00145864	Detected	0	-0.765543	Detected	0.445282	Detected	-0.16013	0.81616	18.2	17.9	8.68	23.5	A_33_P3221978	Unknown
A_33_P3221980	-0.0218115	Detected	0.021812	Detected	2.385e-07	0.136032	Detected	0.192859	Detected	0.164445	0.0443175	5710	5800	5170	6290	A_33_P3221980	Unknown
A_33_P3222196	-0.0512953	Compromised	0.0512958	Compromised	2.385e-07	0.181162	Compromised	0.0321693	Compromised	0.106666	0.359565	1.72	1.82	1.64	1.73	A_33_P3222196	Unknown
A_33_P3222354	0.242087	Compromised	-0.242087	Compromised	0	-0.10882	Compromised	-0.275995	Compromised	-0.192407	0.530862	2.64	1.86	1.68	1.75	A_33_P3222354	Unknown
A_33_P3222524	-0.154204	Compromised	0.154204	Compromised	0	-0.820191	Compromised	-0.462845	Compromised	-0.641518	0.112889	6.08	7.42	3.11	4.66	A_33_P3222524	Unknown
A_33_P3222529	0.276175	Compromised	-0.276175	Compromised	0	-0.164267	Compromised	-0.413794	Compromised	-0.28903	0.440871	3.11	2.09	1.86	1.83	A_33_P3222529	Unknown
A_33_P3222600	0.0418181	Detected	-0.0418181	Detected	0	0.0566835	Detected	0.219018	Detected	0.137851	0.270177	30	27.9	24.6	32.2	A_33_P3222600	Unknown
A_33_P3222664	-0.116113	Detected	0.116113	Detected	0	0.34709	Detected	0.162081	Detected	0.254586	0.228503	774	896	866	891	A_33_P3222664	Unknown
A_33_P3223111	-0.188369	Compromised	0.188369	Compromised	-1.15e-07	0.664662	Detected	0.967652	Detected	0.816157	0.0776441	6.76	8.65	9.91	14.3	A_33_P3223111	Unknown
A_33_P3223142	-0.185295	Compromised	0.185295	Compromised	0	-0.710709	Compromised	-0.142002	Compromised	-0.426355	0.335892	3.21	4.09	1.81	3.14	A_33_P3223142	Unknown
A_33_P3223663	-0.0449619	Compromised	0.0449615	Compromised	-2.39e-07	-0.131308	Compromised	-0.357377	Compromised	-0.244342	0.182339	2.25	2.36	1.72	1.72	A_33_P3223663	Unknown
A_33_P3223712	-0.0461116	Compromised	0.0461111	Compromised	-2.385e-07	0.171642	Compromised	-0.0121155	Compromised	0.0797634	0.518992	1.78	1.87	1.68	1.73	A_33_P3223712	Unknown
A_33_P3223860	0.412591	Compromised	-0.412591	Compromised	2.4e-07	-0.273143	Compromised	1.14256	Compromised	0.434707	0.648737	3.29	1.83	1.66	5.18	A_33_P3223860	Unknown
A_33_P3224050	-0.798545	Compromised	0.798545	Compromised	0	0.320627	Compromised	-1.30841	Compromised	-0.49389	0.707247	2.7	8.05	4.76	1.8	A_33_P3224050	Unknown
A_33_P3224285	-0.0560231	Compromised	0.0560231	Compromised	0	-1.82444	Compromised	-1.58196	Compromised	-1.7032	0.00609309	7.22	7.69	1.72	2.38	A_33_P3224285	Unknown
A_33_P3224715	0.105265	Compromised	-0.105265	Compromised	-2.4e-07	-0.0499434	Compromised	-0.309959	Compromised	-0.179951	0.39458	2.36	2.01	1.72	1.68	A_33_P3224715	Unknown
A_33_P3224780	-0.0399146	Compromised	0.0399146	Compromised	0	-0.974882	Compromised	0.432756	Compromised	-0.271063	0.737633	4.57	4.76	1.94	6.02	A_33_P3224780	Unknown
A_33_P3224971	0.0931394	Detected	-0.0931394	Detected	0	0.14834	Detected	0.291569	Detected	0.219955	0.202073	874	757	737	952	A_33_P3224971	Unknown
A_33_P3225128	-0.045917	Compromised	0.0459175	Compromised	2.38e-07	0.180828	Compromised	0.00480032	Compromised	0.0928142	0.448513	1.79	1.88	1.7	1.76	A_33_P3225128	Unknown
A_33_P3225572	-0.0965073	Detected	0.0965073	Detected	0	0.352093	Detected	0.182608	Detected	0.26735	0.172833	1580	1780	1750	1820	A_33_P3225572	Unknown
A_33_P3225983	0.140993	Detected	-0.140993	Detected	0	0.164825	Detected	0.134584	Detected	0.149705	0.401788	89.2	72.3	73.6	84.3	A_33_P3225983	Unknown
A_33_P3226105	-0.114752	Detected	0.114752	Detected	0	-0.839224	Detected	-0.959682	Detected	-0.899453	0.0201356	19.3	22.3	9.48	10.2	A_33_P3226105	Unknown
A_33_P3226228	-0.115795	Detected	0.115795	Detected	0	0.052305	Detected	-0.235529	Detected	-0.0916119	0.669066	94.2	109	85.9	82.3	A_33_P3226228	Unknown
A_33_P3226460	-0.26914	Compromised	0.26914	Compromised	0	-0.981267	Compromised	-1.15487	Compromised	-1.06807	0.0634983	3.27	4.68	1.62	1.68	A_33_P3226460	Unknown
A_33_P3226565	-0.00580072	Detected	0.00580072	Detected	0	-0.0551276	Detected	0.0115857	Detected	-0.021771	0.586092	153	152	120	147	A_33_P3226565	Unknown
A_33_P3226675	0.0669565	Compromised	-0.066957	Compromised	-2.4e-07	1.08897	Compromised	-0.186565	Compromised	0.451204	0.55456	2.16	1.94	3.56	1.72	A_33_P3226675	Unknown
A_33_P3226680	-0.122938	Compromised	0.122938	Compromised	1.195e-07	-1.31362	Compromised	-0.0459523	Compromised	-0.679787	0.402829	7.65	8.94	2.72	7.66	A_33_P3226680	Unknown
A_33_P3226788	-0.0412312	Detected	0.0412312	Detected	0	-0.592006	Detected	0.145897	Detected	-0.223054	0.60898	161	168	89.2	174	A_33_P3226788	Unknown
A_33_P3226800	-0.577816	Compromised	0.577816	Compromised	0	0.653167	Compromised	-0.527098	Compromised	0.0630343	0.946111	1.79	3.93	3.41	1.76	A_33_P3226800	Unknown
A_33_P3227010	-0.0776813	Detected	0.0776815	Detected	1.2e-07	-0.0988059	Compromised	-0.0593977	Detected	-0.0791018	0.427675	9.84	10.8	7.87	9.46	A_33_P3227010	Unknown
A_33_P3227212	-0.2176	Compromised	0.2176	Detected	0	-0.886207	Compromised	0.230613	Detected	-0.327797	0.639281	8.03	10.7	4.1	10.4	A_33_P3227212	Unknown
A_33_P3227225	-0.0440879	Detected	0.0440879	Detected	0	-0.88514	Compromised	-0.191379	Detected	-0.538259	0.2636	14.7	15.4	6.66	12.6	A_33_P3227225	Unknown
A_33_P3227260	0.560057	Compromised	-0.560057	Compromised	0	-0.341936	Compromised	-0.708325	Compromised	-0.525131	0.466869	4.72	2.14	2.05	1.86	A_33_P3227260	Unknown
A_33_P3227300	-0.0467873	Compromised	0.0467868	Compromised	-2.385e-07	0.162264	Compromised	-0.103993	Compromised	0.0291357	0.855531	1.94	2.04	1.82	1.77	A_33_P3227300	Unknown
A_33_P3227457	0.160041	Detected	-0.160041	Detected	0	-0.18384	Detected	-0.330073	Detected	-0.256956	0.28163	907	716	580	613	A_33_P3227457	Unknown
A_33_P3227556	-0.0784891	Detected	0.0784891	Detected	0	-0.159763	Detected	-0.159922	Detected	-0.159842	0.178627	99.2	109	76.1	89	A_33_P3227556	Unknown
A_33_P3227703	0.0703905	Detected	-0.0703905	Detected	0	0.400094	Detected	0.058254	Detected	0.229174	0.340783	80.1	71.6	81.7	75.4	A_33_P3227703	Unknown
A_33_P3228212	0.0353656	Compromised	-0.0353656	Compromised	0	-0.415884	Compromised	-1.20489	Compromised	-0.810386	0.177386	4.38	4.11	2.6	1.76	A_33_P3228212	Unknown
A_33_P3228402	0.581855	Compromised	-0.581855	Compromised	0	0.379571	Compromised	0.166948	Compromised	0.27326	0.689475	7.57	3.33	5.34	5.39	A_33_P3228402	Unknown
A_33_P3228499	0.113819	Compromised	-0.113819	Compromised	-2.375e-07	-1.3448	Compromised	-1.02118	Compromised	-1.18299	0.0268449	7.01	5.9	2.07	3.03	A_33_P3228499	Unknown
A_33_P3228533	-0.017817	Compromised	0.017817	Compromised	0	0.0959291	Compromised	-0.163888	Compromised	-0.0339794	0.819762	1.97	1.99	1.73	1.69	A_33_P3228533	Unknown
A_33_P3228543	0.192184	Compromised	-0.192184	Compromised	0	-0.977367	Compromised	-0.885075	Compromised	-0.931221	0.0422158	4.49	3.39	1.62	2.02	A_33_P3228543	Unknown
A_33_P3228603	-0.0457253	Compromised	0.0457253	Compromised	0	1.79701	Compromised	0.576442	Compromised	1.18673	0.192048	1.8	1.89	5.24	2.63	A_33_P3228603	Unknown
A_33_P3228828	-0.0515485	Compromised	0.0515485	Compromised	0	0.170766	Compromised	1.36075	Compromised	0.765757	0.328316	1.88	1.99	1.78	4.75	A_33_P3228828	Unknown
A_33_P3228868	0.463604	Detected	-0.463604	Compromised	1.15e-07	-0.410313	Compromised	0.594848	Detected	0.0922675	0.905012	12.6	6.53	5.58	13.1	A_33_P3228868	Unknown
A_33_P3229012	0.0963485	Detected	-0.0963485	Detected	0	-0.021601	Detected	0.140556	Detected	0.0594773	0.683214	47.2	40.7	35.3	46.2	A_33_P3229012	Unknown
A_33_P3229022	-0.000274658	Detected	0.000274181	Detected	-2.38415e-07	0.049356	Detected	-0.0677772	Detected	-0.00921059	0.889481	4250	4190	3570	3850	A_33_P3229022	Unknown
A_33_P3229037	-0.0422821	Compromised	0.0422821	Compromised	0	0.169621	Compromised	-0.0874748	Compromised	0.0410728	0.790159	2	2.09	1.88	1.84	A_33_P3229037	Unknown
A_33_P3229390	-0.0385478	Detected	0.0385478	Detected	0	-0.128803	Detected	-0.292535	Detected	-0.210669	0.145324	1010	1050	770	804	A_33_P3229390	Unknown
A_33_P3229527	-0.062077	Detected	0.062077	Detected	0	-0.778829	Detected	-0.493936	Detected	-0.636383	0.054767	243	261	120	171	A_33_P3229527	Unknown
A_33_P3229577	0.268467	Detected	-0.268467	Detected	-1.25e-07	-0.210306	Detected	-0.55315	Compromised	-0.381728	0.353501	15.9	10.8	9.26	8.54	A_33_P3229577	Unknown
A_33_P3229587	0.0886335	Detected	-0.0886335	Detected	0	-0.401101	Detected	-0.123322	Detected	-0.262212	0.252491	32.7	28.5	18.9	26.8	A_33_P3229587	Unknown
A_33_P3229678	-0.0173681	Detected	0.0173683	Detected	1.195e-07	-0.504445	Compromised	-0.706977	Compromised	-0.605711	0.0275882	10.5	10.6	6.08	6.18	A_33_P3229678	Unknown
A_33_P3229754	-0.0469089	Compromised	0.0469089	Compromised	0	0.203635	Compromised	-0.0138717	Compromised	0.0948815	0.50712	1.74	1.83	1.68	1.69	A_33_P3229754	Unknown
A_33_P3229760	-0.556697	Compromised	0.556696	Compromised	-2.5e-07	1.42047	Compromised	-0.481596	Compromised	0.469437	0.711579	1.74	3.71	5.56	1.74	A_33_P3229760	Unknown
A_33_P3229789	-0.0308516	Detected	0.0308516	Detected	0	0.0874536	Detected	0.150183	Detected	0.118818	0.114108	21	21.6	18.5	22.6	A_33_P3229789	Unknown
A_33_P3229958	-0.0594544	Compromised	0.0594544	Compromised	0	0.198902	Compromised	-0.00132608	Compromised	0.098788	0.485552	1.71	1.83	1.66	1.69	A_33_P3229958	Unknown
A_33_P3230048	-0.37142	Compromised	0.37142	Compromised	0	-0.290127	Compromised	-0.447483	Compromised	-0.368805	0.433815	1.91	3.15	1.64	1.72	A_33_P3230048	Unknown
A_33_P3230578	0.388563	Compromised	-0.388564	Compromised	-2.35e-07	0.502334	Compromised	-0.532254	Compromised	-0.0149601	0.983652	3.53	2.03	3.1	1.77	A_33_P3230578	Unknown
A_33_P3230676	0.0954246	Detected	-0.0954249	Detected	-1.2e-07	-2.40177	Compromised	-0.381328	Compromised	-1.39155	0.303852	11.2	9.67	1.61	7.64	A_33_P3230676	Unknown
A_33_P3231005	0.0332003	Detected	-0.0332007	Detected	-2.38e-07	0.161791	Detected	0.306241	Detected	0.234016	0.0986094	10200	9600	9050	11700	A_33_P3231005	Unknown
A_33_P3231342	0.469812	Compromised	-0.469813	Compromised	-2.35e-07	-0.327984	Compromised	-0.537079	Compromised	-0.432532	0.463672	3.62	1.86	1.69	1.71	A_33_P3231342	Unknown
A_33_P3231437	0.647256	Compromised	-0.647255	Compromised	2.5e-07	-0.508619	Compromised	-0.708693	Compromised	-0.608656	0.450826	4.53	1.82	1.65	1.68	A_33_P3231437	Unknown
A_33_P3231562	0.373861	Compromised	-0.373861	Compromised	0	-0.849269	Compromised	0.0544305	Compromised	-0.397419	0.567875	4.89	2.87	1.7	3.72	A_33_P3231562	Unknown
A_33_P3231677	-0.0986922	Detected	0.0986922	Detected	0	0.378801	Detected	0.28092	Detected	0.32986	0.0957754	40	45.2	45.2	49.4	A_33_P3231677	Unknown
A_33_P3231761	-0.146983	Compromised	0.146983	Compromised	0	-1.13349	Compromised	-1.41711	Compromised	-1.2753	0.024702	4.37	5.28	1.79	1.72	A_33_P3231761	Unknown
A_33_P3231833	-0.00895047	Detected	0.00895047	Detected	0	-0.147225	Detected	-0.144191	Detected	-0.145708	0.00385932	457	456	337	395	A_33_P3231833	Unknown
A_33_P3232544	0.0134437	Detected	-0.0134437	Detected	0	-0.079849	Detected	0.0885451	Detected	0.00434804	0.963964	673	651	512	673	A_33_P3232544	Unknown
A_33_P3232643	-0.0591011	Compromised	0.0591016	Compromised	2.375e-07	0.19093	Compromised	-0.0881567	Compromised	0.0513866	0.766838	2.01	2.15	1.94	1.87	A_33_P3232643	Unknown
A_33_P3232742	0.766922	Compromised	-0.766922	Compromised	2.5e-07	0.322665	Compromised	-0.352792	Compromised	-0.0150635	0.98729	5.7	1.94	3.4	2.49	A_33_P3232742	Unknown
A_33_P3233000	0.0973337	Detected	-0.0973337	Detected	0	-0.673389	Detected	-0.0259459	Detected	-0.349668	0.409634	28.8	24.8	13.7	25.1	A_33_P3233000	Unknown
A_33_P3233085	-0.193732	Compromised	0.193732	Compromised	-2.4e-07	-1.05851	Compromised	-1.6412	Compromised	-1.34985	0.061091	5.43	7	2.42	1.89	A_33_P3233085	Unknown
A_33_P3233100	0.330498	Detected	-0.330498	Compromised	0	-0.212851	Compromised	-0.333441	Compromised	-0.273146	0.501586	11.6	7.23	6.46	6.95	A_33_P3233100	Unknown
A_33_P3233229	-0.0435753	Compromised	0.0435753	Compromised	0	0.156448	Compromised	-0.110493	Compromised	0.0229774	0.885048	1.92	2.01	1.79	1.74	A_33_P3233229	Unknown
A_33_P3233318	-0.127764	Compromised	0.127763	Detected	-1.2e-07	-0.636353	Compromised	-0.185051	Compromised	-0.410702	0.254082	9.01	10.6	5.14	8.22	A_33_P3233318	Unknown
A_33_P3233546	-0.0363617	Compromised	0.0363617	Compromised	0	0.163661	Compromised	0.267559	Compromised	0.21561	0.0766766	1.92	1.99	1.79	2.25	A_33_P3233546	Unknown
A_33_P3233731	0.0891943	Compromised	-0.0891938	Compromised	2.4e-07	0.816762	Detected	0.604768	Detected	0.710765	0.0359516	7.59	6.61	10.2	10.3	A_33_P3233731	Unknown
A_33_P3233953	0.0953026	Detected	-0.0953031	Detected	-2.4e-07	-0.282216	Detected	-0.0700459	Detected	-0.176131	0.342206	4690	4050	2930	3970	A_33_P3233953	Unknown
A_33_P3234108	-0.051527	Compromised	0.0515275	Compromised	2.385e-07	0.83179	Compromised	-0.0192389	Compromised	0.406276	0.443247	1.71	1.81	2.56	1.66	A_33_P3234108	Unknown
A_33_P3234377	0.0522347	Detected	-0.0522351	Detected	-2.38e-07	-0.0886006	Detected	-0.311648	Detected	-0.200124	0.245656	6480	5940	4770	4780	A_33_P3234377	Unknown
A_33_P3234402	-0.0600138	Compromised	0.0600138	Compromised	0	0.189005	Compromised	0.447098	Compromised	0.318052	0.154985	1.69	1.81	1.63	2.28	A_33_P3234402	Unknown
A_33_P3234442	-0.0570855	Compromised	0.0570855	Compromised	0	1.10538	Compromised	0.11862	Compromised	0.611999	0.343077	1.8	1.92	3.27	1.93	A_33_P3234442	Unknown
A_33_P3234447	-0.0366287	Compromised	0.0366287	Compromised	0	0.210385	Compromised	-0.0556498	Compromised	0.0773678	0.6314	1.9	1.97	1.83	1.78	A_33_P3234447	Unknown
A_33_P3234540	-0.0105307	Detected	0.0105307	Detected	0	0.526707	Detected	0.455361	Detected	0.491034	0.0056889	135	135	159	177	A_33_P3234540	Unknown
A_33_P3234814	-0.0491147	Compromised	0.0491147	Compromised	0	0.170526	Compromised	-0.0555429	Compromised	0.0574913	0.686747	1.82	1.92	1.72	1.72	A_33_P3234814	Unknown
A_33_P3235142	-0.0555019	Compromised	0.0555015	Compromised	-2.39e-07	0.21152	Compromised	-0.0145488	Compromised	0.0984855	0.51605	1.71	1.82	1.67	1.67	A_33_P3235142	Unknown
A_33_P3235162	-0.0354686	Compromised	0.0354686	Compromised	0	0.198932	Compromised	-0.097146	Compromised	0.0508931	0.769941	1.99	2.06	1.9	1.81	A_33_P3235162	Unknown
A_33_P3235360	-0.168959	Detected	0.168959	Detected	0	-0.343127	Detected	0.366034	Detected	0.0114534	0.979385	28.5	35.5	20.5	39.2	A_33_P3235360	Unknown
A_33_P3235491	-0.0830889	Detected	0.0830889	Detected	0	0.0133905	Detected	0.0184846	Detected	0.0159376	0.86566	37.8	41.8	32.8	38.5	A_33_P3235491	Unknown
A_33_P3235521	-0.0512953	Compromised	0.0512958	Compromised	2.385e-07	0.189932	Compromised	1.19745	Compromised	0.693693	0.304225	1.72	1.82	1.65	3.88	A_33_P3235521	Unknown
A_33_P3235831	0.126793	Detected	-0.126793	Detected	0	0.234201	Detected	-0.195022	Detected	0.0195897	0.944515	92.3	76.3	80.7	70.1	A_33_P3235831	Unknown
A_33_P3236152	-0.0495319	Compromised	0.0495319	Compromised	0	0.184524	Compromised	-0.080225	Compromised	0.0521493	0.74755	1.98	2.09	1.89	1.84	A_33_P3236152	Unknown
A_33_P3236213	0.236765	Compromised	-0.236765	Compromised	2.35e-07	-1.05084	Compromised	-0.495964	Compromised	-0.773402	0.168053	7.58	5.38	2.52	4.33	A_33_P3236213	Unknown
A_33_P3236778	0.123411	Compromised	-0.123412	Compromised	-2.375e-07	-0.0872288	Compromised	0.430555	Compromised	0.171663	0.610237	5.96	4.95	4.18	7	A_33_P3236778	Unknown
A_33_P3237344	-0.080168	Detected	0.0801682	Detected	1.2e-07	0.0227759	Detected	-0.459632	Detected	-0.218428	0.480703	14.8	16.3	12.9	10.8	A_33_P3237344	Unknown
A_33_P3237605	-0.0968502	Detected	0.0968502	Detected	0	-0.655956	Detected	-0.927112	Detected	-0.791534	0.0415668	23.6	26.6	13	12.6	A_33_P3237605	Unknown
A_33_P3237704	0.00270534	Detected	-0.00270534	Detected	0	0.277403	Detected	0.269905	Detected	0.273654	0.000285283	330	324	324	377	A_33_P3237704	Unknown
A_33_P3237719	-0.259701	Detected	0.259701	Detected	0	0.875951	Detected	0.247986	Detected	0.561969	0.301818	14.3	20.2	25.5	19.3	A_33_P3237719	Unknown
A_33_P3237819	-0.444344	Compromised	0.444344	Compromised	0	-0.306199	Compromised	-0.475853	Compromised	-0.391026	0.478481	3.65	6.66	3.26	3.39	A_33_P3237819	Unknown
A_33_P3237835	-0.212414	Compromised	0.212414	Detected	0	0.365448	Detected	-0.635143	Compromised	-0.134847	0.827206	7.71	10.2	9.34	5.46	A_33_P3237835	Unknown
A_33_P3237905	-0.582991	Compromised	0.582991	Compromised	0	-0.463882	Compromised	-0.640197	Compromised	-0.552039	0.447974	1.94	4.29	1.71	1.77	A_33_P3237905	Unknown
A_33_P3238325	0.221278	Detected	-0.221278	Detected	0	-2.28969	Compromised	-0.499082	Detected	-1.39439	0.269683	30.2	21.9	4.3	17.4	A_33_P3238325	Unknown
A_33_P3238402	0.0155449	Detected	-0.0155449	Detected	0	0.0655823	Detected	0.189613	Detected	0.127598	0.18408	33.8	32.6	28.4	36.2	A_33_P3238402	Unknown
A_33_P3238611	0.0567937	Compromised	-0.0567942	Compromised	-2.385e-07	0.0834565	Compromised	-0.0751052	Compromised	0.00417566	0.969736	2.02	1.84	1.67	1.75	A_33_P3238611	Unknown
A_33_P3238773	-0.53879	Compromised	0.53879	Detected	0	-0.979113	Compromised	-0.23092	Detected	-0.605017	0.453704	8.51	17.7	5.09	10	A_33_P3238773	Unknown
A_33_P3238802	-0.0481095	Compromised	0.0481095	Compromised	0	0.1819	Compromised	-0.0686912	Compromised	0.0566041	0.714219	1.87	1.97	1.78	1.75	A_33_P3238802	Unknown
A_33_P3238944	-0.047199	Detected	0.047199	Detected	0	0.0549896	Detected	-0.228069	Detected	-0.0865395	0.620519	32.6	34.3	28.4	27.3	A_33_P3238944	Unknown
A_33_P3239102	0.0449858	Detected	-0.0449853	Detected	2.38e-07	-0.394564	Detected	-0.309082	Detected	-0.351823	0.0297277	5130	4750	3070	3810	A_33_P3239102	Unknown
A_33_P3239659	0.326031	Compromised	-0.326031	Compromised	0	0.0861812	Compromised	-1.29189	Compromised	-0.602855	0.511913	5.82	3.65	4	1.8	A_33_P3239659	Unknown
A_33_P3239714	-0.0506158	Compromised	0.0506158	Compromised	0	0.183047	Compromised	0.0244856	Compromised	0.103766	0.384934	1.75	1.85	1.67	1.75	A_33_P3239714	Unknown
A_33_P3239724	0.0867929	Compromised	-0.0867934	Compromised	-2.37e-07	0.248357	Compromised	-0.0899782	Compromised	0.0791893	0.717491	2.06	1.8	1.87	1.73	A_33_P3239724	Unknown
A_33_P3239936	-0.196	Compromised	0.196	Compromised	-2.4e-07	0.00347424	Compromised	-0.230722	Compromised	-0.113624	0.668054	1.91	2.47	1.78	1.77	A_33_P3239936	Unknown
A_33_P3239989	0.0429268	Compromised	-0.0429268	Compromised	0	-1.54323	Compromised	0.355924	Compromised	-0.593651	0.596024	7.14	6.63	1.93	8.42	A_33_P3239989	Unknown
A_33_P3240078	-0.438624	Compromised	0.438624	Detected	0	-0.0996284	Compromised	0.0377617	Compromised	-0.0309334	0.950792	5.27	9.54	5.41	6.96	A_33_P3240078	Unknown
A_33_P3240144	-0.0362301	Compromised	0.0362306	Compromised	2.385e-07	0.148216	Compromised	-0.118958	Compromised	0.0146294	0.925472	1.93	2	1.78	1.73	A_33_P3240144	Unknown
A_33_P3240158	-0.219887	Compromised	0.219887	Compromised	0	-0.057694	Compromised	0.147395	Compromised	0.0448504	0.870389	1.96	2.62	1.78	2.4	A_33_P3240158	Unknown
A_33_P3240234	0.2152	Detected	-0.2152	Detected	0	-0.968258	Detected	-0.848002	Detected	-0.90813	0.055543	36.1	26.4	12.9	16.4	A_33_P3240234	Unknown
A_33_P3240652	-0.196255	Detected	0.196255	Detected	-1.2e-07	-0.461278	Compromised	0.0411179	Detected	-0.21008	0.577609	12.6	16.3	8.51	14.1	A_33_P3240652	Unknown
A_33_P3241043	0.0913105	Detected	-0.0913105	Detected	0	0.167904	Detected	-0.0754871	Detected	0.0462084	0.790027	88099.9	76499.9	75400	74500.1	A_33_P3241043	Unknown
A_33_P3241046	0.704045	Compromised	-0.704046	Compromised	-2.5e-07	-1.12708	Compromised	-0.682795	Compromised	-0.904938	0.345033	7.19	2.67	1.64	2.61	A_33_P3241046	Unknown
A_33_P3241150	-0.322818	Compromised	0.322818	Compromised	-2.4e-07	0.185214	Compromised	0.893433	Detected	0.539324	0.377276	4.67	7.2	5.39	10.3	A_33_P3241150	Unknown
A_33_P3241184	0.191002	Detected	-0.191002	Detected	0	0.863731	Detected	0.757956	Detected	0.810843	0.0548714	160	121	207	225	A_33_P3241184	Unknown
A_33_P3241596	0.0354583	Detected	-0.0354583	Detected	0	0.497093	Detected	0.666953	Detected	0.582023	0.0241043	1020	957	1140	1500	A_33_P3241596	Unknown
A_33_P3242039	-0.193705	Detected	0.193705	Detected	0	-0.774114	Detected	-0.468462	Detected	-0.621288	0.1281	33.9	43.7	18.4	26.6	A_33_P3242039	Unknown
A_33_P3242062	-0.154397	Compromised	0.154397	Compromised	0	0.445114	Compromised	-0.273799	Compromised	0.0856576	0.846999	2.22	2.71	2.73	1.94	A_33_P3242062	Unknown
A_33_P3242416	0.0669372	Detected	-0.0669372	Detected	0	0.144459	Detected	-0.330638	Detected	-0.0930896	0.742296	38.3	34.4	32.8	27.6	A_33_P3242416	Unknown
A_33_P3242753	-0.0391026	Compromised	0.0391026	Compromised	0	0.140505	Compromised	-0.142147	Compromised	-0.00082064	0.996043	1.98	2.06	1.82	1.75	A_33_P3242753	Unknown
A_33_P3242814	-0.355361	Compromised	0.355361	Compromised	0	0.0360069	Compromised	0.555621	Compromised	0.295814	0.570818	1.86	3	1.98	3.32	A_33_P3242814	Unknown
A_33_P3243343	-0.0122433	Detected	0.0122437	Detected	2.385e-07	-0.0871854	Detected	0.01932	Detected	-0.0339327	0.59794	8410	8430	6480	8159.99	A_33_P3243343	Unknown
A_33_P3243600	0.177544	Compromised	-0.177544	Compromised	0	0.742733	Compromised	0.333135	Compromised	0.537934	0.185604	2.44	1.88	2.93	2.58	A_33_P3243600	Unknown
A_33_P3244157	-0.243619	Compromised	0.243619	Compromised	0	-0.0585461	Compromised	-0.131806	Compromised	-0.095176	0.736477	1.94	2.68	1.79	1.99	A_33_P3244157	Unknown
A_33_P3244269	0.248834	Detected	-0.248834	Detected	1.2e-07	0.407651	Detected	0.160049	Detected	0.28385	0.414538	14.9	10.4	13.5	13.3	A_33_P3244269	Unknown
A_33_P3244361	-0.032728	Detected	0.032728	Detected	0	-0.0173123	Detected	-0.521331	Detected	-0.269322	0.400313	1280	1320	1050	866	A_33_P3244361	Unknown
A_33_P3244651	-0.044796	Compromised	0.0447965	Compromised	2.385e-07	0.15962	Compromised	-0.0748115	Compromised	0.0424044	0.767594	1.85	1.94	1.73	1.72	A_33_P3244651	Unknown
A_33_P3244834	-0.394557	Compromised	0.394557	Compromised	0	0.179138	Compromised	1.13086	Compromised	0.654998	0.400385	2.02	3.44	2.44	5.52	A_33_P3244834	Unknown
A_33_P3245021	-0.329535	Compromised	0.329535	Compromised	2.4e-07	-0.0778337	Compromised	-0.303902	Compromised	-0.190868	0.638758	1.78	2.77	1.72	1.72	A_33_P3245021	Unknown
A_33_P3245126	0.0415237	Detected	-0.0415237	Detected	0	-0.646391	Compromised	-0.142762	Detected	-0.394576	0.262133	15.8	14.7	7.96	13.2	A_33_P3245126	Unknown
A_33_P3245133	0.0240045	Detected	-0.0240045	Detected	0	-0.427515	Detected	-0.0328369	Detected	-0.230176	0.366507	49.2	46.9	29.2	44.9	A_33_P3245133	Unknown
A_33_P3245620	0.0533474	Detected	-0.0533474	Detected	0	0.00948072	Detected	-0.358446	Detected	-0.174483	0.458486	1180	1080	929	842	A_33_P3245620	Unknown
A_33_P3245623	-0.279692	Compromised	0.279692	Detected	1.15e-07	-0.0334301	Compromised	-2.21059	Compromised	-1.12201	0.42331	7.23	10.5	6.96	1.8	A_33_P3245623	Unknown
A_33_P3245660	-0.0517616	Compromised	0.0517616	Compromised	0	0.161945	Compromised	0.00626612	Compromised	0.0841057	0.463219	1.7	1.8	1.6	1.68	A_33_P3245660	Unknown
A_33_P3245841	0.402919	Compromised	-0.402919	Compromised	-2.4e-07	-0.29183	Compromised	0.977392	Compromised	0.342781	0.693118	3.53	1.99	1.77	4.99	A_33_P3245841	Unknown
A_33_P3245907	0.262815	Compromised	-0.262815	Compromised	0	-0.108925	Compromised	-0.376813	Compromised	-0.242869	0.496866	2.79	1.91	1.75	1.7	A_33_P3245907	Unknown
A_33_P3246011	0.270409	Compromised	-0.270409	Compromised	0	-0.13469	Compromised	-0.414914	Compromised	-0.274802	0.462123	3.1	2.1	1.9	1.83	A_33_P3246011	Unknown
A_33_P3246413	0.0922613	Compromised	-0.0922613	Compromised	0	-1.01411	Compromised	0.138906	Compromised	-0.437603	0.531713	5.12	4.44	1.93	5.02	A_33_P3246413	Unknown
A_33_P3246780	-0.0354686	Compromised	0.0354686	Compromised	0	0.928285	Compromised	-0.170727	Compromised	0.378779	0.562595	1.99	2.06	3.15	1.72	A_33_P3246780	Unknown
A_33_P3247068	-0.0339279	Compromised	0.0339279	Compromised	0	0.168839	Compromised	-0.00718927	Compromised	0.0808246	0.481805	1.82	1.88	1.7	1.76	A_33_P3247068	Unknown
A_33_P3247072	0.373883	Compromised	-0.373883	Compromised	0	-0.422722	Compromised	-0.271633	Compromised	-0.347178	0.458804	3.51	2.06	1.64	2.13	A_33_P3247072	Unknown
A_33_P3247077	-0.0124512	Detected	0.0124516	Detected	2.385e-07	-0.127602	Detected	-0.416634	Detected	-0.272118	0.201474	3750	3760	2810	2690	A_33_P3247077	Unknown
A_33_P3247095	-0.147469	Detected	0.147469	Detected	0	-0.220464	Detected	-0.594958	Detected	-0.407711	0.229285	46.4	56.1	35.8	32.3	A_33_P3247095	Unknown
A_33_P3247210	-0.0702901	Detected	0.0702901	Detected	0	-0.0561671	Detected	-0.232425	Detected	-0.144296	0.328937	52.1	56.6	42.7	44.2	A_33_P3247210	Unknown
A_33_P3247252	0.464757	Compromised	-0.464757	Compromised	2.35e-07	-0.317673	Compromised	-0.585321	Compromised	-0.451497	0.449092	3.73	1.93	1.76	1.71	A_33_P3247252	Unknown
A_33_P3247678	-0.142854	Detected	0.142854	Detected	-1.2e-07	-0.73173	Compromised	-0.14737	Detected	-0.43955	0.309107	14.9	17.9	8.04	14.1	A_33_P3247678	Unknown
A_33_P3247689	-0.0444384	Compromised	0.0444388	Compromised	2.39e-07	0.177443	Compromised	-0.073288	Compromised	0.0520775	0.733181	1.87	1.96	1.77	1.74	A_33_P3247689	Unknown
A_33_P3247783	0.269703	Compromised	-0.269703	Compromised	0	-0.0643625	Compromised	-0.402077	Compromised	-0.23322	0.539864	2.92	1.98	1.88	1.74	A_33_P3247783	Unknown
A_33_P3247919	-0.159515	Detected	0.159515	Detected	0	0.115968	Detected	-0.21768	Detected	-0.0508558	0.846059	17	20.9	16.7	15.5	A_33_P3247919	Unknown
A_33_P3248028	-0.369887	Compromised	0.369888	Compromised	2.4e-07	-0.102076	Compromised	1.00555	Compromised	0.451735	0.567537	1.75	2.88	1.71	4.31	A_33_P3248028	Unknown
A_33_P3248077	-0.062201	Compromised	0.0622005	Compromised	-2.385e-07	0.10432	Compromised	-0.1941	Compromised	-0.0448902	0.807323	2.02	2.17	1.84	1.75	A_33_P3248077	Unknown
A_33_P3248222	0.168245	Compromised	-0.168245	Compromised	0	-0.657182	Compromised	-0.883251	Compromised	-0.770216	0.0627999	3.69	2.88	1.69	1.69	A_33_P3248222	Unknown
A_33_P3248774	-0.122967	Detected	0.122967	Detected	0	-0.0470901	Detected	0.0649347	Detected	0.00892234	0.95336	33.2	38.8	28.4	35.9	A_33_P3248774	Unknown
A_33_P3248939	-0.900748	Compromised	0.900747	Compromised	-2.5e-07	0.276433	Compromised	0.0410872	Compromised	0.15876	0.877353	1.7	5.84	3.12	3.1	A_33_P3248939	Unknown
A_33_P3248948	0.355973	Compromised	-0.355973	Compromised	2.35e-07	0.749261	Compromised	0.0982056	Compromised	0.423733	0.472358	3.64	2.19	3.88	2.89	A_33_P3248948	Unknown
A_33_P3248997	-0.0467873	Compromised	0.0467868	Compromised	-2.385e-07	0.185851	Compromised	-0.0638042	Compromised	0.0610235	0.692042	1.94	2.04	1.85	1.82	A_33_P3248997	Unknown
A_33_P3249002	0.104618	Detected	-0.104618	Detected	2.37e-07	-0.137794	Detected	-0.257562	Detected	-0.197678	0.24271	12200	10400	8370	9010	A_33_P3249002	Unknown
A_33_P3249066	0.00773215	Detected	-0.00773215	Compromised	0	-0.545746	Compromised	0.296959	Detected	-0.124393	0.795683	10	9.75	5.53	11.6	A_33_P3249066	Unknown
A_33_P3249897	0.257041	Detected	-0.257041	Compromised	0	-1.98828	Compromised	-0.734353	Compromised	-1.36132	0.182284	11.1	7.66	1.9	5.3	A_33_P3249897	Unknown
A_33_P3250263	0.0473404	Compromised	-0.0473404	Compromised	0	-0.986186	Compromised	-1.07475	Compromised	-1.03047	0.0039339	4.54	4.19	1.8	1.98	A_33_P3250263	Unknown
A_33_P3250323	-0.0888934	Detected	0.0888934	Detected	0	0.451464	Detected	0.810358	Detected	0.630911	0.0876987	9.15	10.2	10.8	16.2	A_33_P3250323	Unknown
A_33_P3250669	-0.236927	Compromised	0.236927	Compromised	0	1.15256	Compromised	1.29893	Compromised	1.22575	0.038574	1.98	2.71	4.21	5.45	A_33_P3250669	Unknown
A_33_P3250767	-0.180122	Detected	0.180122	Detected	0	-0.149042	Detected	-0.0702558	Detected	-0.109649	0.612369	61.5	77.8	51	63	A_33_P3250767	Unknown
A_33_P3251209	0.0976281	Compromised	-0.0976281	Compromised	0	0.0178494	Compromised	-0.264802	Compromised	-0.123477	0.546871	2.37	2.04	1.82	1.75	A_33_P3251209	Unknown
A_33_P3251252	-0.301479	Detected	0.301479	Detected	0	-0.44944	Detected	-0.638355	Detected	-0.543897	0.227288	15.7	23.5	11.5	11.8	A_33_P3251252	Unknown
A_33_P3251408	-0.876889	Compromised	0.876889	Compromised	0	-0.654193	Compromised	-0.810299	Compromised	-0.732246	0.493038	1.7	5.65	1.61	1.69	A_33_P3251408	Unknown
A_33_P3251412	-0.0348673	Compromised	0.0348678	Compromised	2.385e-07	0.133036	Compromised	-0.164586	Compromised	-0.0157747	0.927212	2.04	2.11	1.86	1.77	A_33_P3251412	Unknown
A_33_P3251557	1.20389	Detected	-1.20389	Compromised	1e-07	0.011919	Compromised	0.37981	Compromised	0.195864	0.887007	10.5	1.95	3.73	5.63	A_33_P3251557	Unknown
A_33_P3251598	0.381823	Compromised	-0.381822	Compromised	2.5e-07	-0.666592	Compromised	0.966008	Compromised	0.149708	0.883335	5.53	3.21	2.17	7.87	A_33_P3251598	Unknown
A_33_P3251868	-0.2156	Compromised	0.2156	Compromised	0	-0.651396	Compromised	0.45583	Compromised	-0.0977828	0.8844	2.95	3.92	1.77	4.46	A_33_P3251868	Unknown
A_33_P3251916	-0.265461	Compromised	0.265461	Compromised	-2.35e-07	-0.00403786	Compromised	-0.270979	Compromised	-0.137508	0.688985	1.84	2.62	1.79	1.74	A_33_P3251916	Unknown
A_33_P3252134	-0.0338624	Detected	0.0338624	Detected	0	-0.000938177	Detected	-0.254912	Detected	-0.127925	0.433035	943	974	783	768	A_33_P3252134	Unknown
A_33_P3252191	-0.00822496	Detected	0.00822496	Detected	0	-0.215065	Detected	-0.206015	Detected	-0.21054	0.00198225	94	93.7	66.1	77.8	A_33_P3252191	Unknown
A_33_P3252279	0.0136895	Compromised	-0.013689	Compromised	2.385e-07	0.171902	Compromised	-0.0768871	Compromised	0.0475073	0.740749	2.12	2.05	1.92	1.89	A_33_P3252279	Unknown
A_33_P3252441	-0.275264	Detected	0.275264	Detected	0	-0.599777	Compromised	0.0377009	Detected	-0.281038	0.573259	10.6	15.3	6.87	12.5	A_33_P3252441	Unknown
A_33_P3252444	-0.0552483	Compromised	0.0552483	Compromised	0	1.33141	Compromised	0.778463	Compromised	1.05494	0.0645838	1.72	1.83	3.65	2.91	A_33_P3252444	Unknown
A_33_P3252594	-0.146889	Detected	0.146889	Detected	0	0.0702748	Detected	-0.0315509	Detected	0.019362	0.912273	49.5	59.8	46.7	50.9	A_33_P3252594	Unknown
A_33_P3252685	-0.0246749	Compromised	0.0246754	Compromised	2.39e-07	0.203246	Compromised	0.851647	Compromised	0.527447	0.24622	2.02	2.06	1.92	3.52	A_33_P3252685	Unknown
A_33_P3253124	0.568652	Compromised	-0.568652	Compromised	2.25e-07	0.742992	Compromised	0.699788	Compromised	0.72139	0.332523	4.04	1.81	3.7	4.2	A_33_P3253124	Unknown
A_33_P3253179	-0.0356579	Compromised	0.0356579	Compromised	0	-0.64576	Compromised	-0.993223	Compromised	-0.819491	0.043784	5.36	5.55	2.85	2.62	A_33_P3253179	Unknown
A_33_P3253304	-1.50463	Compromised	1.50463	Detected	1e-07	0.328264	Compromised	0.201732	Compromised	0.264998	0.876525	1.84	14.6	5.32	5.7	A_33_P3253304	Unknown
A_33_P3253420	-0.0512953	Compromised	0.0512958	Compromised	2.385e-07	1.0857	Compromised	0.0321693	Compromised	0.558937	0.401664	1.72	1.82	3.07	1.73	A_33_P3253420	Unknown
A_33_P3253717	-0.0341835	Compromised	0.034184	Compromised	2.39e-07	0.167451	Compromised	0.000276089	Compromised	0.0838635	0.451109	1.8	1.86	1.68	1.75	A_33_P3253717	Unknown
A_33_P3253812	0.218143	Detected	-0.218143	Detected	1.2e-07	-0.00842404	Detected	0.0582888	Detected	0.0249324	0.920365	17.3	12.6	12	14.7	A_33_P3253812	Unknown
A_33_P3253832	0.0137415	Detected	-0.013741	Detected	2.385e-07	-0.107216	Detected	-0.122103	Detected	-0.11466	0.0180746	2720	2630	2030	2350	A_33_P3253832	Unknown
A_33_P3253892	-0.0507174	Compromised	0.0507174	Compromised	0	0.165336	Compromised	-0.101147	Compromised	0.0320945	0.842797	1.92	2.03	1.81	1.76	A_33_P3253892	Unknown
A_33_P3253902	0.372887	Detected	-0.372888	Compromised	-1.15e-07	-1.04723	Compromised	-1.95293	Compromised	-1.50008	0.124909	12.2	7.17	3.7	2.31	A_33_P3253902	Unknown
A_33_P3254375	-0.354811	Compromised	0.354811	Detected	-1.25e-07	-0.107737	Compromised	0.475449	Detected	0.183856	0.727625	7.88	12.7	7.59	13.3	A_33_P3254375	Unknown
A_33_P3254580	-0.0434079	Compromised	0.0434079	Compromised	0	0.141038	Compromised	1.27213	Compromised	0.706583	0.339009	1.93	2.02	1.78	4.56	A_33_P3254580	Unknown
A_33_P3254675	-0.396926	Compromised	0.396926	Compromised	0	-0.15465	Compromised	-0.338408	Compromised	-0.246529	0.606628	1.75	2.99	1.68	1.73	A_33_P3254675	Unknown
A_33_P3254831	-0.78956	Compromised	0.78956	Detected	0	-0.444097	Detected	-0.0318124	Detected	-0.237955	0.798055	8.66	25.5	8.93	13.9	A_33_P3254831	Unknown
A_33_P3255046	0.0328255	Detected	-0.032825	Detected	2.385e-07	-0.0651011	Detected	-0.112463	Detected	-0.0887823	0.159541	2400	2260	1820	2060	A_33_P3255046	Unknown
A_33_P3255056	0.833703	Detected	-0.833703	Compromised	1.2e-07	-0.761651	Compromised	0.493767	Detected	-0.133942	0.909616	15.6	4.84	4.19	11.7	A_33_P3255056	Unknown
A_33_P3255065	-0.202863	Compromised	0.202863	Compromised	0	0.0243068	Compromised	-0.168403	Compromised	-0.0720482	0.778775	1.8	2.35	1.71	1.75	A_33_P3255065	Unknown
A_33_P3255070	-0.0489092	Compromised	0.0489092	Compromised	0	0.171189	Compromised	-0.0548797	Compromised	0.0581546	0.683304	1.83	1.93	1.73	1.73	A_33_P3255070	Unknown
A_33_P3255359	-0.0473213	Compromised	0.0473208	Compromised	-2.385e-07	0.193906	Compromised	0.0444584	Compromised	0.119182	0.310177	1.72	1.81	1.65	1.74	A_33_P3255359	Unknown
A_33_P3255677	-0.367944	Compromised	0.367944	Compromised	-1.2e-07	-1.71155	Compromised	0.465927	Detected	-0.62281	0.642167	5.91	9.7	1.89	10	A_33_P3255677	Unknown
A_33_P3255824	-0.0503941	Compromised	0.0503945	Compromised	2.375e-07	0.200735	Compromised	0.00821876	Compromised	0.104477	0.437727	1.76	1.86	1.7	1.74	A_33_P3255824	Unknown
A_33_P3256355	-0.146227	Detected	0.146227	Detected	0	0.0873797	Detected	0.271399	Detected	0.179389	0.408174	45.9	55.4	43.8	58.2	A_33_P3256355	Unknown
A_33_P3256480	0.079951	Detected	-0.079951	Detected	0	-0.313466	Detected	-0.336251	Detected	-0.324858	0.056604	246	217	152	175	A_33_P3256480	Unknown
A_33_P3256565	-0.0757291	Detected	0.0757289	Detected	-1.2e-07	0.425378	Detected	0.483406	Detected	0.454392	0.0304072	14.8	16.2	17	20.7	A_33_P3256565	Unknown
A_33_P3256655	-0.0374641	Compromised	0.0374641	Compromised	0	0.207749	Compromised	-0.0347137	Compromised	0.0865178	0.565707	1.84	1.91	1.77	1.75	A_33_P3256655	Unknown
A_33_P3256883	0.464931	Compromised	-0.464931	Compromised	0	0.329267	Compromised	0.241624	Compromised	0.285446	0.603258	5.78	2.99	4.27	4.7	A_33_P3256883	Unknown
A_33_P3256888	-0.12309	Detected	0.12309	Detected	0	-0.617382	Detected	-0.505034	Detected	-0.561208	0.053503	30.2	35.3	17.4	22	A_33_P3256888	Unknown
A_33_P3257179	-0.0429044	Compromised	0.0429044	Compromised	0	-1.40944	Compromised	-1.54804	Compromised	-1.47874	0.00302447	6.1	6.38	1.92	2.04	A_33_P3257179	Unknown
A_33_P3257479	-0.0251038	Detected	0.0251038	Detected	0	0.120788	Detected	-0.686968	Detected	-0.28309	0.556607	24.5	25	22	14.7	A_33_P3257479	Unknown
A_33_P3257755	0.0753667	Detected	-0.0753667	Detected	0	0.199117	Detected	0.0919898	Detected	0.145553	0.256104	579	514	512	556	A_33_P3257755	Unknown
A_33_P3258417	-0.209089	Detected	0.209089	Detected	0	0.206188	Detected	-0.44409	Detected	-0.118951	0.78739	24.3	32	26.3	19.6	A_33_P3258417	Unknown
A_33_P3258561	-0.0449781	Compromised	0.0449781	Compromised	0	0.787912	Compromised	-0.0258331	Compromised	0.381039	0.450205	1.84	1.93	2.66	1.77	A_33_P3258561	Unknown
A_33_P3258727	-0.0249581	Compromised	0.0249581	Compromised	0	0.0897985	Compromised	0.605662	Compromised	0.34773	0.311688	1.98	2.02	1.74	2.91	A_33_P3258727	Unknown
A_33_P3258732	-0.0575919	Compromised	0.0575914	Compromised	-2.375e-07	0.194109	Compromised	-0.0488329	Compromised	0.0726383	0.643089	1.78	1.9	1.72	1.7	A_33_P3258732	Unknown
A_33_P3258752	-0.0597324	Compromised	0.0597324	Compromised	0	0.198369	Compromised	0.00685739	Compromised	0.102613	0.459209	1.7	1.82	1.65	1.69	A_33_P3258752	Unknown
A_33_P3258846	-0.225502	Detected	0.225502	Detected	0	0.0584404	Detected	-0.299079	Detected	-0.120319	0.716475	337	454	333	304	A_33_P3258846	Unknown
A_33_P3259239	0.47186	Compromised	-0.47186	Compromised	2.35e-07	-1.03789	Compromised	-0.917231	Compromised	-0.977563	0.176221	6.07	3.11	1.73	2.2	A_33_P3259239	Unknown
A_33_P3259303	-0.0597324	Compromised	0.0597324	Compromised	0	0.207086	Compromised	-0.00170469	Compromised	0.10269	0.483164	1.7	1.82	1.66	1.68	A_33_P3259303	Unknown
A_33_P3259560	0.00361395	Detected	-0.00361371	Detected	1.192e-07	0.737224	Detected	0.237705	Detected	0.487465	0.190262	10.3	10.1	13.9	11.5	A_33_P3259560	Unknown
A_33_P3259750	-0.051527	Compromised	0.0515275	Compromised	2.385e-07	0.17164	Compromised	0.00660133	Compromised	0.0891209	0.456334	1.71	1.81	1.62	1.69	A_33_P3259750	Unknown
A_33_P3259954	-0.029171	Compromised	0.0291715	Compromised	2.385e-07	0.194416	Compromised	0.301392	Compromised	0.247904	0.0554259	1.91	1.96	1.81	2.28	A_33_P3259954	Unknown
A_33_P3260021	-0.127764	Detected	0.127764	Detected	0	-0.243518	Detected	-0.38168	Detected	-0.312599	0.164274	25.5	30	19.1	20.3	A_33_P3260021	Unknown
A_33_P3260034	-0.0343397	Detected	0.0343397	Detected	0	0.0532863	Detected	0.17474	Detected	0.114013	0.243816	29.8	30.8	25.7	32.7	A_33_P3260034	Unknown
A_33_P3260263	0.110262	Compromised	-0.110262	Compromised	0	0.060617	Compromised	-0.189974	Compromised	-0.0646784	0.735724	2.27	1.92	1.78	1.75	A_33_P3260263	Unknown
A_33_P3260455	0.0897358	Detected	-0.0897358	Detected	0	-0.109577	Detected	-0.15434	Detected	-0.131959	0.289764	1310	1140	926	1050	A_33_P3260455	Unknown
A_33_P3260868	-0.0634646	Compromised	0.0634651	Compromised	2.4e-07	0.185509	Compromised	-0.086853	Compromised	0.0493279	0.773858	1.97	2.12	1.9	1.84	A_33_P3260868	Unknown
A_33_P3261024	-0.237679	Compromised	0.237679	Compromised	0	0.784448	Compromised	0.889534	Detected	0.836991	0.0751667	4.35	5.96	7.17	9.02	A_33_P3261024	Unknown
A_33_P3261074	0.311875	Compromised	-0.311876	Compromised	-2.4e-07	-0.191763	Compromised	-0.365364	Compromised	-0.278563	0.480205	2.83	1.81	1.62	1.68	A_33_P3261074	Unknown
A_33_P3261097	0.260483	Detected	-0.260482	Compromised	1.25e-07	-0.630992	Compromised	-0.595936	Compromised	-0.613464	0.143205	14.4	9.89	6.3	7.55	A_33_P3261097	Unknown
A_33_P3261192	-0.239492	Compromised	0.239492	Compromised	0	0.00243807	Compromised	-0.0148778	Compromised	-0.00621986	0.981651	1.74	2.39	1.67	1.93	A_33_P3261192	Unknown
A_33_P3261308	-0.202317	Compromised	0.202317	Compromised	2.4e-07	0.510224	Compromised	-0.164305	Compromised	0.17296	0.70306	1.97	2.57	2.62	1.92	A_33_P3261308	Unknown
A_33_P3261428	-0.0246062	Compromised	0.0246062	Compromised	0	0.19619	Compromised	-0.0991406	Compromised	0.0485249	0.776589	2.03	2.07	1.92	1.83	A_33_P3261428	Unknown
A_33_P3261640	0.304228	Detected	-0.304228	Detected	0	-0.515873	Detected	-0.43878	Detected	-0.477326	0.259867	70.7	45.7	32.5	40.1	A_33_P3261640	Unknown
A_33_P3261706	-0.219757	Compromised	0.219757	Compromised	-2.4e-07	-0.0472293	Compromised	-0.303513	Compromised	-0.175371	0.561822	2.11	2.82	1.93	1.89	A_33_P3261706	Unknown
A_33_P3262022	-0.213387	Detected	0.213387	Detected	0	-1.15634	Compromised	0.144445	Detected	-0.505946	0.536797	19.4	25.7	8.19	23.6	A_33_P3262022	Unknown
A_33_P3262074	-0.0711241	Compromised	0.0711236	Compromised	-2.4e-07	0.161514	Compromised	-0.0723734	Compromised	0.0445704	0.775614	1.94	2.11	1.85	1.84	A_33_P3262074	Unknown
A_33_P3262108	-0.208551	Compromised	0.208551	Compromised	-2.35e-07	-1.54357	Compromised	-0.739535	Compromised	-1.14155	0.127891	5.16	6.79	1.66	3.39	A_33_P3262108	Unknown
A_33_P3262128	-0.0471549	Compromised	0.0471554	Compromised	2.385e-07	0.184752	Compromised	-0.0651631	Compromised	0.0597947	0.698191	1.92	2.02	1.83	1.8	A_33_P3262128	Unknown
A_33_P3262167	-0.391833	Compromised	0.391833	Compromised	0	-0.570133	Compromised	-0.58975	Compromised	-0.579942	0.277098	4.35	7.38	3.12	3.6	A_33_P3262167	Unknown
A_33_P3262217	-0.166297	Compromised	0.166297	Compromised	0	0.104971	Compromised	-0.0331902	Compromised	0.0358906	0.860446	1.95	2.42	1.91	2.03	A_33_P3262217	Unknown
A_33_P3262327	0.0867779	Detected	-0.0867779	Detected	0	0.0749567	Detected	0.197301	Detected	0.136129	0.328329	52.3	45.7	42.1	53.6	A_33_P3262327	Unknown
A_33_P3262366	-0.0510669	Compromised	0.0510664	Compromised	-2.375e-07	0.190514	Compromised	0.0406175	Compromised	0.115566	0.330607	1.73	1.83	1.66	1.75	A_33_P3262366	Unknown
A_33_P3262440	-0.173064	Compromised	0.173065	Detected	1.2e-07	-1.39232	Compromised	0.324129	Detected	-0.534094	0.603913	9.18	11.5	3.2	12.3	A_33_P3262440	Unknown
A_33_P3262537	-0.379014	Compromised	0.379014	Detected	0	-0.590398	Compromised	0.196923	Compromised	-0.196737	0.753296	6.12	10.2	4.29	8.66	A_33_P3262537	Unknown
A_33_P3262600	-0.0570855	Compromised	0.0570855	Compromised	0	0.486941	Compromised	-0.064446	Compromised	0.211248	0.53132	1.8	1.92	2.13	1.7	A_33_P3262600	Unknown
A_33_P3262704	-0.0351043	Compromised	0.0351047	Compromised	2.375e-07	0.192817	Compromised	-0.11042	Compromised	0.0411985	0.81601	2.02	2.09	1.92	1.82	A_33_P3262704	Unknown
A_33_P3263198	0.121304	Compromised	-0.121304	Compromised	0	-1.67254	Compromised	0.12657	Detected	-0.772984	0.484142	9.1	7.58	2.13	8.67	A_33_P3263198	Unknown
A_33_P3263202	-0.0528622	Compromised	0.0528617	Compromised	-2.385e-07	0.183456	Compromised	0.462812	Compromised	0.323134	0.162944	1.82	1.93	1.74	2.47	A_33_P3263202	Unknown
A_33_P3263274	0.0667152	Detected	-0.0667157	Detected	-2.4e-07	-0.284773	Detected	-0.17554	Detected	-0.230157	0.116349	7090	6370	4510	5690	A_33_P3263274	Unknown
A_33_P3263293	0.0697012	Compromised	-0.0697017	Compromised	-2.375e-07	-0.417624	Compromised	0.343132	Compromised	-0.0372465	0.932052	2.85	2.55	1.65	3.27	A_33_P3263293	Unknown
A_33_P3263512	-0.0649977	Detected	0.0649982	Detected	2.4e-07	-0.0150304	Detected	-0.353074	Detected	-0.184052	0.416402	10200	11000	8570	7929.99	A_33_P3263512	Unknown
A_33_P3263747	-0.0504575	Detected	0.0504575	Detected	0	-0.157305	Detected	0.190654	Detected	0.0166745	0.935049	123	130	92.7	138	A_33_P3263747	Unknown
A_33_P3263989	-0.017904	Detected	0.017904	Detected	0	-0.112143	Detected	0.0422981	Detected	-0.0349226	0.702576	292	295	222	289	A_33_P3263989	Unknown
A_33_P3264399	-0.0604234	Compromised	0.0604239	Compromised	2.38e-07	0.356224	Compromised	-0.0176153	Compromised	0.169304	0.479603	7.68	8.23	8.32	7.51	A_33_P3264399	Unknown
A_33_P3264424	0.128032	Detected	-0.128032	Detected	0	-0.34648	Detected	-0.641093	Detected	-0.493787	0.127111	107	88.3	62.5	59.6	A_33_P3264424	Unknown
A_33_P3264533	0.444126	Compromised	-0.444126	Compromised	0	-0.615892	Compromised	-0.641047	Compromised	-0.62847	0.29282	4.47	2.38	1.74	2	A_33_P3264533	Unknown
A_33_P3264746	-0.0521009	Detected	0.0521009	Detected	0	0.0806711	Detected	0.0230005	Detected	0.0518358	0.475815	1180	1250	1050	1180	A_33_P3264746	Unknown
A_33_P3264940	0.139565	Compromised	-0.139565	Compromised	-2.4e-07	-0.329461	Compromised	-1.30343	Compromised	-0.816446	0.248353	5.27	4.28	3.09	1.84	A_33_P3264940	Unknown
A_33_P3264955	0.0806344	Detected	-0.0806344	Detected	0	-0.348588	Detected	-0.45918	Detected	-0.403884	0.0539084	2190	1930	1320	1430	A_33_P3264955	Unknown
A_33_P3264960	-0.280815	Detected	0.280815	Detected	0	-0.191149	Detected	-0.173292	Detected	-0.182221	0.583138	13.2	19.2	11.4	13.5	A_33_P3264960	Unknown
A_33_P3265205	0.14924	Compromised	-0.14924	Compromised	-2.4e-07	0.433109	Compromised	-0.960952	Compromised	-0.263922	0.746733	7.55	6.05	7.46	3.32	A_33_P3265205	Unknown
A_33_P3265249	-0.0349855	Compromised	0.0349855	Compromised	0	0.140008	Compromised	-0.157614	Compromised	-0.00880336	0.959313	2.03	2.1	1.86	1.77	A_33_P3265249	Unknown
A_33_P3265254	-0.0501156	Compromised	0.0501156	Compromised	0	0.813649	Compromised	1.67032	Compromised	1.24198	0.102386	1.95	2.06	2.88	6.1	A_33_P3265254	Unknown
A_33_P3265260	-0.485811	Compromised	0.485811	Compromised	0	-0.940488	Compromised	-1.10732	Compromised	-1.0239	0.173389	2.82	5.45	1.67	1.74	A_33_P3265260	Unknown
A_33_P3265264	-0.0214882	Compromised	0.0214877	Compromised	-2.385e-07	0.204131	Compromised	1.24947	Compromised	0.726803	0.299184	1.96	1.99	1.86	4.49	A_33_P3265264	Unknown
A_33_P3265419	-0.00598907	Compromised	0.00598907	Compromised	0	-1.24813	Compromised	0.858244	Compromised	-0.194945	0.870224	4.78	4.75	1.64	8.26	A_33_P3265419	Unknown
A_33_P3265539	-0.0502479	Detected	0.0502479	Detected	0	-2.18422	Compromised	-1.39929	Compromised	-1.79175	0.0454651	10.6	11.2	1.96	3.95	A_33_P3265539	Unknown
A_33_P3265624	-0.0491147	Compromised	0.0491147	Compromised	0	0.28342	Compromised	-0.0471797	Compromised	0.11812	0.564085	1.82	1.92	1.86	1.73	A_33_P3265624	Unknown
A_33_P3265866	-0.071526	Detected	0.071526	Detected	0	-2.1648	Detected	-2.57293	Detected	-2.36886	0.00822985	102	111	19.4	17.1	A_33_P3265866	Unknown
A_33_P3265935	0.275476	Compromised	-0.275477	Compromised	-2.35e-07	0.372809	Compromised	0.326364	Compromised	0.349587	0.333442	7.21	4.85	6.26	7.09	A_33_P3265935	Unknown
A_33_P3266022	0.107772	Detected	-0.107772	Detected	0	0.462491	Detected	-0.408163	Detected	0.0271641	0.957209	23.8	20.2	24.7	15.8	A_33_P3266022	Unknown
A_33_P3266091	-0.0178537	Compromised	0.0178542	Compromised	2.385e-07	0.797889	Compromised	1.50323	Compromised	1.15056	0.0826819	1.96	1.98	2.8	5.34	A_33_P3266091	Unknown
A_33_P3266195	-0.161453	Compromised	0.161453	Detected	-1.2e-07	-2.1461	Compromised	-2.3803	Compromised	-2.2632	0.00767688	8.68	10.7	1.78	1.77	A_33_P3266195	Unknown
A_33_P3266609	-0.238228	Compromised	0.238228	Detected	0	0.0916443	Compromised	0.511103	Detected	0.301373	0.442574	8.46	11.6	8.63	13.5	A_33_P3266609	Unknown
A_33_P3266614	0.167866	Detected	-0.167866	Detected	0	0.231706	Detected	0.168112	Detected	0.199909	0.36253	1780	1390	1510	1690	A_33_P3266614	Unknown
A_33_P3266889	-0.167684	Compromised	0.167684	Detected	0	0.333334	Detected	-0.0170631	Detected	0.158135	0.581283	9.49	11.8	10.9	10	A_33_P3266889	Unknown
A_33_P3267150	0.116628	Detected	-0.116628	Detected	0	-0.0217347	Detected	-0.228174	Detected	-0.124954	0.506561	19.8	16.6	14.6	14.8	A_33_P3267150	Unknown
A_33_P3268161	-0.0347505	Compromised	0.0347509	Compromised	2.4e-07	0.141528	Compromised	-0.139284	Compromised	0.00112223	0.994515	2.05	2.12	1.88	1.81	A_33_P3268161	Unknown
A_33_P3268167	0.0200694	Detected	-0.0200694	Detected	0	0.0865018	Detected	-0.112699	Detected	-0.0130985	0.909217	313	300	266	271	A_33_P3268167	Unknown
A_33_P3268219	-0.073797	Detected	0.0737967	Detected	-1.2e-07	-1.63076	Compromised	-1.34793	Compromised	-1.48935	0.0112771	12	13.1	3.31	4.71	A_33_P3268219	Unknown
A_33_P3268294	-0.872658	Compromised	0.872658	Compromised	2.25e-07	-0.64949	Compromised	-0.806018	Compromised	-0.727754	0.493557	1.71	5.65	1.62	1.7	A_33_P3268294	Unknown
A_33_P3268318	-0.0904024	Detected	0.0904024	Detected	0	-0.292114	Detected	0.208395	Detected	-0.0418591	0.889442	31.6	35.3	22.3	36.9	A_33_P3268318	Unknown
A_33_P3268395	0.976199	Compromised	-0.976198	Compromised	2.5e-07	0.473835	Compromised	0.548161	Compromised	0.510998	0.653097	7.54	1.92	4.32	5.32	A_33_P3268395	Unknown
A_33_P3269373	-0.0513372	Compromised	0.0513377	Compromised	2.39e-07	1.17141	Compromised	-0.0955353	Compromised	0.537935	0.486449	1.89	2	3.58	1.74	A_33_P3269373	Unknown
A_33_P3269380	0.0949175	Detected	-0.0949175	Detected	0	-0.173092	Detected	-0.225909	Detected	-0.199501	0.180154	50	43.2	33.7	38	A_33_P3269380	Unknown
A_33_P3269528	0.120987	Detected	-0.120987	Compromised	0	-0.878884	Compromised	-0.0383773	Detected	-0.458631	0.404347	12	10	4.87	10.2	A_33_P3269528	Unknown
A_33_P3270417	-0.0889587	Compromised	0.0889587	Compromised	0	-0.662994	Compromised	-0.301401	Compromised	-0.482198	0.139093	6.53	7.28	3.56	5.35	A_33_P3270417	Unknown
A_33_P3270474	-0.0769486	Compromised	0.0769486	Compromised	0	0.194626	Compromised	-0.0693102	Compromised	0.0626581	0.721449	1.97	2.16	1.93	1.88	A_33_P3270474	Unknown
A_33_P3270593	-0.129576	Detected	0.129576	Detected	0	-0.0350997	Detected	-0.0767438	Detected	-0.0559218	0.711507	45.7	53.9	39.6	45	A_33_P3270593	Unknown
A_33_P3270639	0.0328252	Detected	-0.032825	Detected	1.185e-07	-0.796792	Compromised	0.420204	Detected	-0.188294	0.786546	12	11.3	5.48	14.9	A_33_P3270639	Unknown
A_33_P3271038	0.203477	Compromised	-0.203477	Compromised	2.4e-07	-0.444578	Compromised	-1.08153	Compromised	-0.763055	0.180937	6.7	4.98	3.47	2.61	A_33_P3271038	Unknown
A_33_P3271121	0.0130446	Detected	-0.0130446	Detected	0	-0.231846	Detected	-0.20963	Detected	-0.220738	0.00597063	622	602	426	506	A_33_P3271121	Unknown
A_33_P3271126	0.0697582	Detected	-0.0697582	Detected	0	0.173329	Detected	-0.299979	Detected	-0.0633252	0.821426	750	671	654	551	A_33_P3271126	Unknown
A_33_P3271187	-0.225723	Detected	0.225723	Detected	0	-0.362924	Detected	-0.537646	Detected	-0.450285	0.203905	18.7	25.2	13.8	14.3	A_33_P3271187	Unknown
A_33_P3271885	-0.125271	Detected	0.125272	Detected	1.2e-07	-0.447505	Compromised	-0.381456	Detected	-0.41448	0.085371	11.6	13.6	7.53	9.22	A_33_P3271885	Unknown
A_33_P3272456	-0.089015	Compromised	0.0890155	Compromised	2.37e-07	0.117939	Compromised	-0.0305924	Compromised	0.0436735	0.742589	1.74	1.94	1.63	1.72	A_33_P3272456	Unknown
A_33_P3272513	0.0134799	Detected	-0.0134799	Detected	0	-0.370309	Detected	-0.0942824	Detected	-0.232296	0.235886	33.6	32.5	20.9	29.6	A_33_P3272513	Unknown
A_33_P3272668	-0.0501752	Compromised	0.0501752	Compromised	0	0.184268	Compromised	0.00853157	Compromised	0.0964	0.441286	1.77	1.87	1.69	1.75	A_33_P3272668	Unknown
A_33_P3272952	0.416085	Detected	-0.416085	Compromised	-1.2e-07	-0.674494	Compromised	-0.885736	Compromised	-0.780115	0.210814	12.7	7.03	4.84	4.89	A_33_P3272952	Unknown
A_33_P3273118	-0.0702386	Compromised	0.0702381	Compromised	-2.4e-07	0.193842	Compromised	-0.0780301	Compromised	0.0579059	0.741493	1.97	2.14	1.92	1.86	A_33_P3273118	Unknown
A_33_P3273752	0.492913	Compromised	-0.492912	Compromised	2.35e-07	0.0966454	Compromised	-0.638437	Compromised	-0.270896	0.70256	4.2	2.09	2.59	1.82	A_33_P3273752	Unknown
A_33_P3273767	0.170754	Compromised	-0.170754	Compromised	0	0.832036	Compromised	-0.322618	Compromised	0.254709	0.713395	2.61	2.03	3.35	1.76	A_33_P3273767	Unknown
A_33_P3273802	-0.0512953	Compromised	0.0512958	Compromised	2.385e-07	1.47107	Compromised	0.742199	Compromised	1.10663	0.0950867	1.72	1.82	4.01	2.83	A_33_P3273802	Unknown
A_33_P3274001	-0.0323911	Detected	0.0323911	Detected	0	-0.251089	Detected	-0.178039	Detected	-0.214564	0.0480657	58.5	60.3	40.8	50.2	A_33_P3274001	Unknown
A_33_P3274006	-0.0495319	Compromised	0.0495319	Compromised	0	0.194413	Compromised	1.30521	Compromised	0.74981	0.310926	1.8	1.9	1.73	4.37	A_33_P3274006	Unknown
A_33_P3274080	0.0740755	Detected	-0.0740755	Detected	0	-0.195531	Detected	-0.253872	Detected	-0.224702	0.105951	75.9	67.5	51.1	57.4	A_33_P3274080	Unknown
A_33_P3274090	0.0786381	Detected	-0.0786381	Detected	0	-0.427827	Compromised	0.390439	Detected	-0.0186937	0.968288	12.9	11.4	7.37	15.2	A_33_P3274090	Unknown
A_33_P3274184	-0.138137	Compromised	0.138137	Detected	0	-2.07448	Compromised	-0.117547	Compromised	-1.09602	0.382878	8.63	10.3	1.83	8.31	A_33_P3274184	Unknown
A_33_P3274189	0.225446	Detected	-0.225446	Detected	0	0.344618	Detected	0.0353739	Detected	0.189996	0.558943	40.5	29.2	35.7	33.7	A_33_P3274189	Unknown
A_33_P3274204	-0.0440874	Compromised	0.0440879	Compromised	2.385e-07	0.162446	Compromised	-0.0966005	Compromised	0.0329225	0.832264	1.89	1.98	1.77	1.73	A_33_P3274204	Unknown
A_33_P3274209	-0.800685	Compromised	0.800685	Compromised	-2.5e-07	-0.60804	Compromised	0.0767841	Compromised	-0.265628	0.789161	2.07	6.19	1.92	3.61	A_33_P3274209	Unknown
A_33_P3274763	0.310142	Compromised	-0.310142	Compromised	0	0.0757613	Compromised	1.03091	Compromised	0.553334	0.433692	2.87	1.84	1.98	4.49	A_33_P3274763	Unknown
A_33_P3275163	-0.0483336	Detected	0.0483336	Detected	0	-0.117402	Detected	0.240339	Detected	0.0614686	0.771616	53.9	56.8	41.7	62.5	A_33_P3275163	Unknown
A_33_P3275415	0.0459023	Detected	-0.0459023	Detected	0	0.523949	Detected	0.506181	Detected	0.515065	0.00813931	59.8	55.3	67.6	78.1	A_33_P3275415	Unknown
A_33_P3275651	0.068964	Compromised	-0.068964	Compromised	0	-0.362656	Compromised	-0.368717	Compromised	-0.365686	0.0338358	5.75	5.15	3.46	4.03	A_33_P3275651	Unknown
A_33_P3275826	0.0339727	Detected	-0.0339727	Detected	0	0.297667	Detected	0.192906	Detected	0.245287	0.0591006	117000	110000	114000	124000	A_33_P3275826	Unknown
A_33_P3276062	0.010221	Compromised	-0.010221	Compromised	0	-1.17576	Compromised	-1.77131	Compromised	-1.47354	0.0385378	6.7	6.51	2.39	1.85	A_33_P3276062	Unknown
A_33_P3276087	-0.530235	Compromised	0.530235	Compromised	0	0.88402	Compromised	-0.037878	Compromised	0.423071	0.60824	3.25	6.68	7.03	4.34	A_33_P3276087	Unknown
A_33_P3276217	-0.0389619	Compromised	0.0389619	Compromised	0	0.149146	Compromised	-0.141053	Compromised	0.0040462	0.98096	1.99	2.07	1.84	1.76	A_33_P3276217	Unknown
A_33_P3276222	0.0929062	Detected	-0.0929062	Detected	0	-0.584065	Detected	-0.753411	Detected	-0.668738	0.0335638	786	681	399	415	A_33_P3276222	Unknown
A_33_P3276376	-0.0736012	Compromised	0.0736012	Compromised	0	0.197974	Compromised	0.529195	Compromised	0.363585	0.182661	1.97	2.15	1.93	2.84	A_33_P3276376	Unknown
A_33_P3276758	-0.186452	Detected	0.186452	Detected	0	-0.0996823	Detected	0.0570464	Detected	-0.021318	0.925675	21	26.8	18.1	23.6	A_33_P3276758	Unknown
A_33_P3276805	-0.0467062	Compromised	0.0467062	Compromised	0	0.186957	Compromised	0.0283952	Compromised	0.107676	0.362495	1.75	1.84	1.67	1.75	A_33_P3276805	Unknown
A_33_P3276808	-0.134941	Compromised	0.134941	Compromised	2.4e-07	0.131877	Compromised	-0.0769129	Compromised	0.0274823	0.88683	1.7	2.02	1.66	1.68	A_33_P3276808	Unknown
A_33_P3276868	-0.0642538	Compromised	0.0642538	Compromised	0	0.176162	Compromised	0.890715	Compromised	0.533439	0.27947	1.94	2.09	1.86	3.57	A_33_P3276868	Unknown
A_33_P3276927	0.543937	Detected	-0.543937	Detected	0	0.04864	Detected	0.0109389	Detected	0.0297894	0.961326	132	61.2	76	86.6	A_33_P3276927	Unknown
A_33_P3277043	0.388652	Compromised	-0.388652	Compromised	-1.1e-07	-0.0519605	Compromised	0.269459	Detected	0.108749	0.82014	10	5.75	5.98	8.74	A_33_P3277043	Unknown
A_33_P3277060	0.185078	Detected	-0.185078	Compromised	1.15e-07	-0.197278	Compromised	-1.49451	Compromised	-0.845893	0.336518	9.01	6.87	5.61	2.67	A_33_P3277060	Unknown
A_33_P3277228	0.696028	Compromised	-0.696028	Compromised	0	-1.08787	Compromised	0.939559	Compromised	-0.074153	0.957398	7.51	2.82	1.77	8.44	A_33_P3277228	Unknown
A_33_P3277378	0.230487	Detected	-0.230487	Compromised	0	-0.584427	Compromised	0.78581	Detected	0.100692	0.901976	11.9	8.52	5.49	16.6	A_33_P3277378	Unknown
A_33_P3277679	0.00671339	Detected	-0.00671339	Detected	0	-1.16984	Compromised	-0.509409	Detected	-0.839624	0.126123	12.7	12.4	4.56	8.43	A_33_P3277679	Unknown
A_33_P3277758	0.160364	Detected	-0.160363	Detected	1.15e-07	-0.340758	Compromised	0.029881	Detected	-0.155439	0.590782	12.8	10.1	7.34	11.1	A_33_P3277758	Unknown
A_33_P3277805	0.0525143	Detected	-0.0525143	Detected	0	-0.0471003	Detected	-0.562375	Detected	-0.304738	0.36614	705	646	534	437	A_33_P3277805	Unknown
A_33_P3277952	0.527575	Compromised	-0.527575	Compromised	0	-0.360676	Compromised	-0.646866	Compromised	-0.503771	0.454035	4.47	2.12	1.96	1.88	A_33_P3277952	Unknown
A_33_P3278152	-0.013063	Detected	0.013063	Detected	0	0.16273	Detected	0.090508	Detected	0.126619	0.0809653	85.3	85.6	78.2	87	A_33_P3278152	Unknown
A_33_P3278159	-0.0594728	Detected	0.0594728	Detected	0	-0.0712569	Detected	-0.366038	Detected	-0.218647	0.302725	641	686	516	492	A_33_P3278159	Unknown
A_33_P3278303	-0.177634	Detected	0.177634	Detected	0	-0.537376	Detected	0.38025	Detected	-0.078563	0.887801	234	295	148	327	A_33_P3278303	Unknown
A_33_P3278684	0.498543	Detected	-0.498543	Compromised	0	1.22598	Detected	-0.236531	Compromised	0.494723	0.632408	12.8	6.32	17.2	7.3	A_33_P3278684	Unknown
A_33_P3278714	-0.12494	Detected	0.12494	Detected	0	0.164914	Detected	0.0108573	Detected	0.0878859	0.610111	25.6	30	25.4	26.7	A_33_P3278714	Unknown
A_33_P3278896	-0.0163953	Detected	0.0163953	Detected	0	-0.276824	Detected	0.266726	Detected	-0.00504875	0.986889	24.5	24.7	16.6	28.3	A_33_P3278896	Unknown
A_33_P3279181	0.154245	Compromised	-0.154245	Compromised	0	0.286202	Compromised	0.625731	Detected	0.455967	0.185161	7.59	6.04	6.75	9.99	A_33_P3279181	Unknown
A_33_P3279381	-0.0316448	Compromised	0.0316448	Compromised	0	0.196276	Compromised	-0.10696	Compromised	0.0446579	0.80023	2.02	2.08	1.92	1.82	A_33_P3279381	Unknown
A_33_P3279388	-0.0560174	Compromised	0.0560174	Compromised	0	0.17519	Compromised	0.0105219	Compromised	0.0928559	0.449543	1.69	1.8	1.61	1.68	A_33_P3279388	Unknown
A_33_P3279392	0.0988393	Compromised	-0.0988393	Compromised	0	0.520961	Compromised	0.492574	Compromised	0.506768	0.0367006	2.63	2.26	2.86	3.28	A_33_P3279392	Unknown
A_33_P3279456	0.0369883	Detected	-0.0369878	Detected	2.4e-07	0.290063	Detected	0.0962357	Detected	0.19315	0.203652	5490	5140	5310	5430	A_33_P3279456	Unknown
A_33_P3279505	-0.799975	Compromised	0.799974	Compromised	-2.3e-07	-0.0316792	Compromised	0.81702	Compromised	0.39267	0.706852	2.38	7.11	3.29	6.93	A_33_P3279505	Unknown
A_33_P3279984	-0.211182	Compromised	0.211182	Compromised	0	-0.816377	Compromised	0.179946	Compromised	-0.318215	0.616019	3.43	4.53	1.83	4.27	A_33_P3279984	Unknown
A_33_P3280325	-0.770366	Compromised	0.770366	Compromised	0	-0.773675	Compromised	0.910821	Compromised	0.0685725	0.957558	2.26	6.48	1.83	6.88	A_33_P3280325	Unknown
A_33_P3280355	0.153412	Detected	-0.153412	Detected	-2.35e-07	-0.00881815	Detected	-0.16034	Detected	-0.084579	0.670036	18200	14500	13200	13900	A_33_P3280355	Unknown
A_33_P3280412	0.127087	Compromised	-0.127087	Compromised	0	1.25714	Detected	-0.928876	Compromised	0.164134	0.895108	7.6	6.28	13.5	3.47	A_33_P3280412	Unknown
A_33_P3280502	0.149599	Detected	-0.149599	Detected	0	0.219443	Detected	0.578337	Detected	0.39889	0.229872	21.6	17.3	18.4	27.6	A_33_P3280502	Unknown
A_33_P3280709	1.11816	Detected	-1.11816	Compromised	1e-07	0.224442	Compromised	0.747519	Compromised	0.48598	0.713313	9.18	1.92	4.01	6.74	A_33_P3280709	Unknown
A_33_P3280974	0.329402	Compromised	-0.329402	Compromised	0	-0.232739	Compromised	1.05943	Compromised	0.413344	0.626191	3.22	2.01	1.77	5.07	A_33_P3280974	Unknown
A_33_P3281176	-0.185375	Detected	0.185375	Detected	0	-0.111415	Detected	-0.049732	Detected	-0.0805733	0.709864	35	44.6	29.9	36.5	A_33_P3281176	Unknown
A_33_P3281303	0.0839207	Detected	-0.0839207	Detected	0	0.0713365	Detected	-0.0600951	Detected	0.00562072	0.962738	22	19.3	17.7	18.9	A_33_P3281303	Unknown
A_33_P3281373	0.141072	Compromised	-0.141072	Compromised	0	-1.4546	Compromised	-0.648397	Compromised	-1.0515	0.132867	8.23	6.67	2.21	4.52	A_33_P3281373	Unknown
A_33_P3281478	0.0384572	Detected	-0.0384572	Detected	0	-0.0513251	Detected	0.245753	Detected	0.0972137	0.591149	19.8	18.5	15.1	21.7	A_33_P3281478	Unknown
A_33_P3281563	-0.581931	Compromised	0.581931	Compromised	2.3e-07	-0.34035	Compromised	0.375955	Compromised	0.0178027	0.981581	1.73	3.82	1.66	3.19	A_33_P3281563	Unknown
A_33_P3281728	-0.819222	Compromised	0.819223	Compromised	2.25e-07	-0.568093	Compromised	1.0059	Compromised	0.218904	0.86499	1.76	5.4	1.7	5.92	A_33_P3281728	Unknown
A_33_P3281765	-0.0122752	Compromised	0.0122752	Compromised	0	0.209922	Compromised	-0.0254011	Compromised	0.0922602	0.517099	8.26	8.28	7.82	7.77	A_33_P3281765	Unknown
A_33_P3282023	-0.819595	Compromised	0.819595	Compromised	0	-0.137335	Compromised	0.91139	Compromised	0.387027	0.729237	1.72	5.28	2.24	5.42	A_33_P3282023	Unknown
A_33_P3282213	0.0610664	Detected	-0.0610666	Detected	-1.19e-07	-1.22728	Compromised	0.136168	Detected	-0.545555	0.509003	12.7	11.5	4.22	12.7	A_33_P3282213	Unknown
A_33_P3282354	0.471347	Compromised	-0.471348	Compromised	-2.35e-07	-0.724817	Compromised	-0.183945	Compromised	-0.454381	0.491054	5.11	2.62	1.81	3.08	A_33_P3282354	Unknown
A_33_P3282624	-0.0495319	Compromised	0.0495319	Compromised	0	0.192137	Compromised	-0.080225	Compromised	0.0559559	0.736597	1.98	2.09	1.9	1.84	A_33_P3282624	Unknown
A_33_P3282649	-0.181584	Detected	0.181584	Detected	-1.2e-07	-1.08932	Compromised	-0.94724	Compromised	-1.01828	0.0347658	9.94	12.6	4.3	5.55	A_33_P3282649	Unknown
A_33_P3282744	-0.0528622	Compromised	0.0528617	Compromised	-2.385e-07	0.183456	Compromised	-0.0677028	Compromised	0.0578768	0.712332	1.82	1.93	1.74	1.71	A_33_P3282744	Unknown
A_33_P3283064	-0.000976324	Detected	0.000976324	Detected	0	0.0522659	Detected	-0.0548613	Detected	-0.00129771	0.982874	152	150	128	139	A_33_P3283064	Unknown
A_33_P3283117	0.467578	Compromised	-0.467578	Compromised	0	0.989408	Compromised	0.518227	Compromised	0.753817	0.286596	3.57	1.84	4.16	3.51	A_33_P3283117	Unknown
A_33_P3283167	0.0189161	Detected	-0.0189166	Detected	-2.385e-07	-0.316276	Detected	-0.209989	Detected	-0.263133	0.0430143	3000	2880	1930	2430	A_33_P3283167	Unknown
A_33_P3283350	-0.287542	Compromised	0.287541	Compromised	-2.35e-07	-0.0624008	Compromised	0.839921	Detected	0.38876	0.542979	4.87	7.15	4.62	10.1	A_33_P3283350	Unknown
A_33_P3283535	0.0548477	Compromised	-0.0548477	Compromised	0	-1.60357	Compromised	-0.0348616	Compromised	-0.819215	0.406856	7.04	6.43	1.81	6.28	A_33_P3283535	Unknown
A_33_P3283646	-0.357745	Compromised	0.357745	Compromised	2.35e-07	-0.899706	Compromised	-1.04915	Compromised	-0.97443	0.116577	2.96	4.79	1.65	1.74	A_33_P3283646	Unknown
A_33_P3283700	0.961798	Compromised	-0.961797	Compromised	2.3e-07	-0.845808	Compromised	-0.620368	Compromised	-0.733088	0.528064	7.16	1.86	1.66	2.27	A_33_P3283700	Unknown
A_33_P3283734	-0.0302949	Compromised	0.0302949	Compromised	0	0.221965	Compromised	-0.00410318	Compromised	0.108931	0.450201	1.8	1.85	1.74	1.74	A_33_P3283734	Unknown
A_33_P3284117	-0.0475311	Compromised	0.0475307	Compromised	-2.39e-07	0.202108	Compromised	-0.0152431	Compromised	0.0934327	0.513403	1.71	1.8	1.65	1.66	A_33_P3284117	Unknown
A_33_P3284252	-0.0573373	Compromised	0.0573373	Compromised	0	0.760016	Compromised	0.781876	Compromised	0.770946	0.00568345	1.79	1.91	2.56	3.04	A_33_P3284252	Unknown
A_33_P3284295	-0.616756	Compromised	0.616756	Compromised	0	-0.0735106	Compromised	0.823996	Compromised	0.375242	0.671439	2.08	4.82	2.46	5.36	A_33_P3284295	Unknown
A_33_P3284873	-0.767065	Compromised	0.767065	Compromised	0	-0.535158	Compromised	-0.364038	Compromised	-0.449598	0.619143	1.92	5.48	1.83	2.41	A_33_P3284873	Unknown
A_33_P3285097	-0.0203452	Detected	0.0203452	Detected	0	-0.33611	Detected	-0.192554	Detected	-0.264332	0.071252	14.6	14.8	9.52	12.3	A_33_P3285097	Unknown
A_33_P3285371	-0.0503941	Compromised	0.0503945	Compromised	2.375e-07	1.61152	Compromised	-0.0168719	Compromised	0.797325	0.431444	1.76	1.86	4.52	1.71	A_33_P3285371	Unknown
A_33_P3285764	-0.725068	Compromised	0.725067	Compromised	-2.3e-07	-0.506834	Compromised	-0.633936	Compromised	-0.570385	0.515309	1.79	4.82	1.69	1.81	A_33_P3285764	Unknown
A_33_P3285769	-0.00237942	Detected	0.00237894	Detected	-2.384e-07	-0.0204387	Detected	-0.0572362	Detected	-0.0388374	0.171362	26700	26400	21400	24400	A_33_P3285769	Unknown
A_33_P3286101	-0.395664	Compromised	0.395663	Compromised	-2.4e-07	-0.257114	Compromised	-0.524762	Compromised	-0.390938	0.448095	1.97	3.36	1.76	1.71	A_33_P3286101	Unknown
A_33_P3286162	-0.00618529	Detected	0.00618529	Detected	0	0.149226	Detected	0.193364	Detected	0.171295	0.0174358	333	331	301	363	A_33_P3286162	Unknown
A_33_P3286499	-0.387877	Compromised	0.387877	Compromised	-2.3e-07	-0.832443	Compromised	-0.0541201	Compromised	-0.443282	0.504486	2.75	4.64	1.64	3.29	A_33_P3286499	Unknown
A_33_P3286699	0.606753	Compromised	-0.606753	Compromised	0	0.0883927	Compromised	-0.416692	Compromised	-0.16415	0.82608	8.33	3.54	4.72	3.89	A_33_P3286699	Unknown
A_33_P3286709	-1.00736	Compromised	1.00736	Compromised	0	0.263975	Compromised	-0.923846	Compromised	-0.329936	0.804352	1.71	6.81	3.35	1.72	A_33_P3286709	Unknown
A_33_P3287084	0.0881	Detected	-0.0881	Detected	0	0.207776	Detected	0.092351	Detected	0.150063	0.290254	31.3	27.3	27.6	29.8	A_33_P3287084	Unknown
A_33_P3287105	-0.073045	Detected	0.073045	Detected	0	0.0756752	Detected	-0.555046	Detected	-0.239685	0.536163	718	783	646	488	A_33_P3287105	Unknown
A_33_P3287238	-0.0352249	Compromised	0.0352244	Compromised	-2.385e-07	0.106746	Compromised	-0.176547	Compromised	-0.0349004	0.833292	2.01	2.08	1.8	1.73	A_33_P3287238	Unknown
A_33_P3287310	-0.0760567	Detected	0.0760567	Detected	0	0.366233	Detected	0.105644	Detected	0.235939	0.258295	65.2	71.4	71.9	70.2	A_33_P3287310	Unknown
A_33_P3287314	0.405182	Compromised	-0.405182	Compromised	0	0.789007	Detected	-0.182248	Compromised	0.30338	0.678788	8.31	4.67	8.8	5.25	A_33_P3287314	Unknown
A_33_P3287388	0.11877	Detected	-0.11877	Detected	0	0.159862	Detected	0.230397	Detected	0.19513	0.255946	117	97.8	97.7	120	A_33_P3287388	Unknown
A_33_P3287897	-0.152815	Detected	0.152815	Detected	0	-0.0304101	Detected	-0.64918	Detected	-0.339795	0.428576	26.6	32.4	23.5	17.9	A_33_P3287897	Unknown
A_33_P3288079	-0.338799	Compromised	0.338798	Detected	-1.2e-07	-0.638139	Compromised	-1.37131	Compromised	-1.00473	0.181773	7.93	12.5	5.23	3.68	A_33_P3288079	Unknown
A_33_P3288275	-0.264161	Compromised	0.264161	Compromised	2.35e-07	-0.0464067	Compromised	1.13287	Compromised	0.543231	0.488973	1.78	2.53	1.68	4.45	A_33_P3288275	Unknown
A_33_P3288434	-0.0286107	Compromised	0.0286102	Compromised	-2.38e-07	0.126241	Compromised	0.737322	Compromised	0.431781	0.294699	1.97	2.02	1.78	3.18	A_33_P3288434	Unknown
A_33_P3288814	0.800567	Compromised	-0.800567	Compromised	-2.25e-07	-0.749941	Compromised	-0.10607	Compromised	-0.428005	0.669026	6.28	2.04	1.74	3.18	A_33_P3288814	Unknown
A_33_P3288919	-0.225437	Compromised	0.225437	Compromised	0	0.0326638	Compromised	-0.158847	Compromised	-0.0630918	0.820805	1.7	2.29	1.65	1.69	A_33_P3288919	Unknown
A_33_P3288995	-0.183707	Compromised	0.183706	Compromised	-2.4e-07	-0.303451	Compromised	-0.494614	Compromised	-0.399033	0.193824	3.28	4.17	2.45	2.51	A_33_P3288995	Unknown
A_33_P3289000	0.393764	Compromised	-0.393764	Compromised	0	-0.452965	Compromised	1.22931	Detected	0.388174	0.716579	5.85	3.34	2.64	9.91	A_33_P3289000	Unknown
A_33_P3289093	0.0227966	Compromised	-0.0227966	Compromised	0	-1.525	Compromised	-1.08171	Compromised	-1.30335	0.0280033	5.98	5.71	1.66	2.64	A_33_P3289093	Unknown
A_33_P3289391	-0.0311177	Detected	0.0311177	Detected	0	0.338036	Detected	0.162537	Detected	0.250287	0.114993	82.9	85.3	86.9	90	A_33_P3289391	Unknown
A_33_P3289466	-0.0131302	Detected	0.0131302	Detected	0	0.00718784	Detected	-0.372291	Detected	-0.182551	0.438428	27.7	27.8	22.8	20.5	A_33_P3289466	Unknown
A_33_P3289976	0.0382023	Detected	-0.0382023	Detected	0	0.17848	Detected	-0.0354805	Detected	0.0714998	0.593387	39800	37200	35600	35900	A_33_P3289976	Unknown
A_33_P3290149	-0.583172	Compromised	0.583173	Detected	2.5e-07	-0.578678	Compromised	0.381917	Detected	-0.0983806	0.908308	5.38	11.9	4.38	9.97	A_33_P3290149	Unknown
A_33_P3290610	-0.0501752	Compromised	0.0501752	Compromised	0	0.184268	Compromised	0.0167522	Compromised	0.10051	0.411488	1.77	1.87	1.69	1.76	A_33_P3290610	Unknown
A_33_P3291150	-0.051527	Compromised	0.0515275	Compromised	2.385e-07	0.17164	Compromised	0.0235744	Compromised	0.0976074	0.392313	1.71	1.81	1.62	1.71	A_33_P3291150	Unknown
A_33_P3291160	0.371563	Detected	-0.371563	Detected	0	0.134206	Detected	-0.186279	Detected	-0.0260363	0.954549	32.1	18.9	22.1	20.7	A_33_P3291160	Unknown
A_33_P3291662	-0.0591793	Compromised	0.0591793	Compromised	0	0.616626	Compromised	-0.0180254	Compromised	0.2993	0.451702	1.72	1.84	2.23	1.68	A_33_P3291662	Unknown
A_33_P3291772	0.37588	Detected	-0.375881	Compromised	-1.2e-07	-1.88132	Compromised	0.154	Detected	-0.863659	0.509454	12.9	7.55	2.19	10.5	A_33_P3291772	Unknown
A_33_P3292158	-0.0555019	Compromised	0.0555015	Compromised	-2.39e-07	0.478867	Compromised	-0.0145488	Compromised	0.232159	0.455493	1.71	1.82	2.01	1.67	A_33_P3292158	Unknown
A_33_P3292241	0.117389	Detected	-0.117389	Detected	0	-0.41687	Detected	-0.1332	Detected	-0.275035	0.273803	48	40.2	26.9	38.3	A_33_P3292241	Unknown
A_33_P3292994	0.414399	Detected	-0.414399	Compromised	1.25e-07	-1.58901	Compromised	-0.368771	Compromised	-0.978891	0.315674	12.4	6.88	2.51	6.84	A_33_P3292994	Unknown
A_33_P3293138	-0.0792825	Detected	0.0792823	Detected	-1.18e-07	-0.142269	Detected	-1.22694	Compromised	-0.684606	0.338017	13	14.3	10.1	5.57	A_33_P3293138	Unknown
A_33_P3293307	-0.0308995	Detected	0.0308995	Detected	0	-0.733177	Detected	-0.479252	Detected	-0.606215	0.043455	83.8	86.2	41.8	58.3	A_33_P3293307	Unknown
A_33_P3293466	-0.0636849	Compromised	0.0636854	Compromised	2.4e-07	0.203133	Compromised	-0.0056572	Compromised	0.098738	0.504184	1.7	1.83	1.66	1.68	A_33_P3293466	Unknown
A_33_P3293645	0.228091	Detected	-0.228091	Compromised	0	-0.532945	Compromised	0.249254	Detected	-0.141846	0.78371	10.9	7.83	5.22	10.5	A_33_P3293645	Unknown
A_33_P3293698	-0.145575	Detected	0.145575	Detected	0	0.682841	Detected	-0.578998	Compromised	0.0519215	0.943389	10.2	12.3	14.7	7.17	A_33_P3293698	Unknown
A_33_P3293734	-0.021589	Detected	0.021589	Detected	0	0.02159	Detected	-0.00408196	Detected	0.00875401	0.760709	971	986	812	933	A_33_P3293734	Unknown
A_33_P3294078	0.271286	Compromised	-0.271286	Compromised	-2.5e-07	-0.626929	Compromised	0.456661	Compromised	-0.085134	0.901136	7.05	4.77	3.07	7.61	A_33_P3294078	Unknown
A_33_P3294089	0.0836334	Compromised	-0.0836329	Compromised	2.37e-07	0.740632	Compromised	0.6535	Compromised	0.697066	0.0178136	2.86	2.51	3.66	4.03	A_33_P3294089	Unknown
A_33_P3294103	-0.653971	Compromised	0.653971	Compromised	0	-0.0168352	Compromised	-0.741599	Compromised	-0.379217	0.662408	2.25	5.49	2.84	2.01	A_33_P3294103	Unknown
A_33_P3294314	0.357029	Compromised	-0.35703	Compromised	-2.3e-07	0.810479	Compromised	0.451385	Compromised	0.630932	0.25514	5.21	3.13	5.79	5.28	A_33_P3294314	Unknown
A_33_P3294342	-0.0288868	Compromised	0.0288863	Compromised	-2.385e-07	0.156186	Compromised	-0.11907	Compromised	0.018558	0.907088	1.94	1.99	1.79	1.73	A_33_P3294342	Unknown
A_33_P3294415	0.331718	Detected	-0.331718	Compromised	0	-0.354345	Compromised	0.330004	Detected	-0.0121703	0.981945	13.5	8.4	6.81	12.8	A_33_P3294415	Unknown
A_33_P3294730	-0.0401287	Compromised	0.0401282	Compromised	-2.39e-07	0.159346	Compromised	0.334061	Compromised	0.246703	0.124184	1.91	1.99	1.78	2.35	A_33_P3294730	Unknown
A_33_P3295077	-0.249858	Detected	0.249857	Detected	-1.15e-07	0.596308	Detected	0.825244	Detected	0.710776	0.12261	12.2	17	17.8	24.4	A_33_P3295077	Unknown
A_33_P3295623	-0.404295	Compromised	0.404295	Compromised	0	-0.82789	Compromised	0.428754	Compromised	-0.199568	0.81441	3.14	5.42	1.9	5.31	A_33_P3295623	Unknown
A_33_P3295705	0.0370479	Detected	-0.0370479	Detected	0	-0.587014	Detected	-0.199266	Detected	-0.39314	0.184628	37.6	35.2	19.8	30.3	A_33_P3295705	Unknown
A_33_P3295814	-0.0644014	Detected	0.0644014	Detected	0	0.169654	Detected	0.134461	Detected	0.152057	0.150448	74.8	80.6	71.4	81.5	A_33_P3295814	Unknown
A_33_P3295932	-0.0330358	Detected	0.0330358	Detected	0	0.0841713	Detected	0.427594	Detected	0.255883	0.280923	28.4	29.3	25	37.1	A_33_P3295932	Unknown
A_33_P3296099	-0.357538	Compromised	0.357538	Compromised	0	-1.49511	Compromised	-0.972096	Compromised	-1.2336	0.108379	4.5	7.28	1.66	2.79	A_33_P3296099	Unknown
A_33_P3296313	0.683093	Compromised	-0.683093	Compromised	0	-0.554987	Compromised	-0.789517	Compromised	-0.672252	0.434394	4.97	1.9	1.71	1.7	A_33_P3296313	Unknown
A_33_P3296348	-0.048965	Compromised	0.048965	Compromised	0	0.163395	Compromised	-0.101353	Compromised	0.0310211	0.846429	2.01	2.12	1.89	1.84	A_33_P3296348	Unknown
A_33_P3296696	-0.0392451	Compromised	0.0392446	Compromised	-2.4e-07	0.123689	Compromised	-0.159931	Compromised	-0.018121	0.913246	1.97	2.05	1.79	1.72	A_33_P3296696	Unknown
A_33_P3296721	-0.0766547	Detected	0.0766544	Detected	-1.18e-07	-1.04361	Compromised	-0.0484743	Detected	-0.54604	0.391428	12.5	13.7	5.19	12.1	A_33_P3296721	Unknown
A_33_P3296769	0.167752	Detected	-0.167752	Compromised	0	-0.763687	Compromised	0.354274	Detected	-0.204706	0.75927	13.7	10.7	5.83	14.8	A_33_P3296769	Unknown
A_33_P3297150	-0.861403	Compromised	0.861403	Compromised	2.35e-07	-0.594585	Compromised	-0.811988	Compromised	-0.703287	0.502984	1.7	5.53	1.66	1.67	A_33_P3297150	Unknown
A_33_P3297280	-0.0477219	Compromised	0.0477214	Compromised	-2.385e-07	0.183058	Compromised	-0.0510473	Compromised	0.0660055	0.653628	1.89	1.99	1.8	1.79	A_33_P3297280	Unknown
A_33_P3297297	-0.0386844	Compromised	0.0386844	Compromised	0	0.173676	Compromised	-0.130819	Compromised	0.0214286	0.903987	2.01	2.09	1.89	1.79	A_33_P3297297	Unknown
A_33_P3297310	0.189092	Compromised	-0.189092	Compromised	2.4e-07	1.12866	Detected	0.544702	Detected	0.836683	0.13797	8.48	6.43	13.2	10.3	A_33_P3297310	Unknown
A_33_P3297360	-0.0377545	Compromised	0.0377545	Compromised	0	0.173473	Compromised	-0.00284195	Compromised	0.0853157	0.467537	1.82	1.89	1.71	1.77	A_33_P3297360	Unknown
A_33_P3297655	-0.0597324	Compromised	0.0597324	Compromised	0	0.198369	Compromised	-0.00170469	Compromised	0.0983319	0.487547	1.7	1.82	1.65	1.68	A_33_P3297655	Unknown
A_33_P3297808	0.221344	Compromised	-0.221344	Compromised	2.4e-07	-0.0653253	Compromised	-0.24047	Compromised	-0.152898	0.586463	2.51	1.82	1.67	1.73	A_33_P3297808	Unknown
A_33_P3297818	-0.0633855	Compromised	0.0633855	Compromised	0	0.194971	Compromised	-0.0138192	Compromised	0.0905759	0.535576	1.71	1.84	1.66	1.68	A_33_P3297818	Unknown
A_33_P3297834	0.142873	Compromised	-0.142873	Compromised	0	0.0308466	Compromised	-0.255343	Compromised	-0.112248	0.634619	2.61	2.11	1.96	1.88	A_33_P3297834	Unknown
A_33_P3298251	0.138581	Detected	-0.138581	Detected	0	0.0477052	Detected	0.0529623	Detected	0.0503337	0.751289	33.2	27	25.3	29.7	A_33_P3298251	Unknown
A_33_P3298267	0.224585	Detected	-0.224585	Compromised	0	1.28199	Detected	0.0913691	Detected	0.686679	0.393338	11.9	8.59	20.1	10.3	A_33_P3298267	Unknown
A_33_P3298398	-0.0508399	Compromised	0.0508399	Compromised	0	0.164938	Compromised	-0.00929117	Compromised	0.0778236	0.521064	1.74	1.84	1.64	1.7	A_33_P3298398	Unknown
A_33_P3298552	0.0945551	Detected	-0.0945551	Detected	0	0.204066	Detected	0.203765	Detected	0.203915	0.163768	627	542	549	642	A_33_P3298552	Unknown
A_33_P3298612	-0.995471	Compromised	0.995471	Detected	0	-0.0817831	Detected	0.790124	Detected	0.354171	0.775439	6.05	23.7	9.25	19.8	A_33_P3298612	Unknown
A_33_P3298955	-0.108969	Compromised	0.108969	Compromised	0	-0.946056	Compromised	-0.59826	Compromised	-0.772158	0.0639357	3.83	4.39	1.74	2.59	A_33_P3298955	Unknown
A_33_P3298980	-0.0412309	Detected	0.0412309	Detected	0	0.562347	Detected	0.460268	Detected	0.511307	0.016071	25.3	26.4	31.2	34	A_33_P3298980	Unknown
A_33_P3299042	-0.177022	Detected	0.177022	Detected	0	0.218124	Detected	0.0178184	Detected	0.117971	0.620537	10.4	13.1	11.1	11.3	A_33_P3299042	Unknown
A_33_P3299047	-0.0449538	Detected	0.0449538	Detected	0	0.491349	Detected	0.136654	Detected	0.314002	0.22825	75.7	79.4	89.1	81.5	A_33_P3299047	Unknown
A_33_P3299125	-0.062952	Compromised	0.062952	Compromised	0	0.171449	Compromised	-0.0853162	Compromised	0.0430663	0.791697	1.99	2.14	1.9	1.86	A_33_P3299125	Unknown
A_33_P3299130	0.233875	Detected	-0.233875	Detected	0	-0.0499179	Detected	-0.034229	Detected	-0.0420735	0.87388	111	79.1	74	87.5	A_33_P3299130	Unknown
A_33_P3299376	-0.0284309	Compromised	0.0284314	Compromised	2.385e-07	0.0873256	Compromised	-0.180563	Compromised	-0.0466187	0.765944	1.99	2.04	1.75	1.7	A_33_P3299376	Unknown
A_33_P3299436	0.128452	Detected	-0.128452	Detected	0	0.274443	Detected	-0.0100555	Detected	0.132194	0.561649	101000	83300	90700	87100	A_33_P3299436	Unknown
A_33_P3299495	-0.034379	Compromised	0.034379	Compromised	0	-1.85544	Compromised	-1.57487	Compromised	-1.71515	0.00701684	7.14	7.38	1.64	2.33	A_33_P3299495	Unknown
A_33_P3299750	-0.0391431	Compromised	0.0391431	Compromised	0	0.193721	Compromised	0.230687	Compromised	0.212204	0.0391825	1.73	1.8	1.65	1.98	A_33_P3299750	Unknown
A_33_P3299972	-0.0505152	Compromised	0.0505147	Compromised	-2.385e-07	0.158043	Compromised	-0.100265	Compromised	0.0288892	0.854272	1.93	2.04	1.81	1.77	A_33_P3299972	Unknown
A_33_P3300022	0.507281	Compromised	-0.507281	Compromised	0	-0.388109	Compromised	-0.390505	Compromised	-0.389307	0.523042	3.69	1.8	1.61	1.88	A_33_P3300022	Unknown
A_33_P3300032	-0.661008	Compromised	0.661008	Compromised	0	-0.484017	Compromised	-0.220035	Compromised	-0.352026	0.65358	1.94	4.78	1.78	2.5	A_33_P3300032	Unknown
A_33_P3300117	-0.2584	Detected	0.2584	Detected	0	0.119184	Detected	0.325226	Detected	0.222205	0.508202	23.9	33.7	25.2	34	A_33_P3300117	Unknown
A_33_P3300179	-0.00800395	Detected	0.00800395	Detected	0	-0.00561881	Detected	-0.141489	Detected	-0.073554	0.394749	57.2	57	46.5	49.5	A_33_P3300179	Unknown
A_33_P3300591	-0.0285206	Compromised	0.0285201	Compromised	-2.385e-07	0.151087	Compromised	-0.0909228	Compromised	0.0300822	0.831349	1.98	2.03	1.82	1.8	A_33_P3300591	Unknown
A_33_P3300877	-0.0332134	Detected	0.0332134	Detected	0	0.0935156	Detected	-0.132553	Detected	-0.0195186	0.883646	72	74.3	63.8	63.8	A_33_P3300877	Unknown
A_33_P3301095	0.168078	Detected	-0.168078	Detected	0	-0.402542	Detected	0.188525	Detected	-0.107008	0.782758	269	210	147	259	A_33_P3301095	Unknown
A_33_P3301097	0.0556228	Detected	-0.0556228	Detected	0	-1.00854	Compromised	-0.0179775	Detected	-0.51326	0.411341	19.4	17.7	7.53	17.5	A_33_P3301097	Unknown
A_33_P3301124	0.936723	Compromised	-0.936722	Compromised	2.3e-07	-0.387427	Compromised	0.35861	Compromised	-0.0144086	0.989895	7.25	1.95	2.35	4.61	A_33_P3301124	Unknown
A_33_P3301129	-0.844786	Compromised	0.844786	Compromised	0	-1.1374	Compromised	0.334925	Compromised	-0.401239	0.754547	2.46	7.82	1.63	5.29	A_33_P3301129	Unknown
A_33_P3301445	-0.0681074	Detected	0.0681074	Detected	0	-0.414215	Detected	-0.367947	Detected	-0.391081	0.0322029	686	743	438	529	A_33_P3301445	Unknown
A_33_P3301509	-0.0467062	Compromised	0.0467062	Compromised	0	0.169575	Compromised	-0.0049634	Compromised	0.0823057	0.493145	1.75	1.84	1.65	1.71	A_33_P3301509	Unknown
A_33_P3301876	0.00749207	Detected	-0.00749207	Detected	0	-0.249385	Detected	-0.258194	Detected	-0.25379	0.00117058	77	75.1	52.3	60.8	A_33_P3301876	Unknown
A_33_P3301980	0.331891	Compromised	-0.331891	Compromised	0	0.766611	Compromised	-0.374066	Compromised	0.196272	0.794183	2.99	1.86	3.28	1.74	A_33_P3301980	Unknown
A_33_P3302390	0.021421	Detected	-0.021421	Detected	0	0.0897422	Detected	0.234708	Detected	0.162225	0.164966	57.7	55.2	49.1	63.5	A_33_P3302390	Unknown
A_33_P3303302	0.102787	Detected	-0.102787	Detected	0	-0.114252	Detected	-0.156807	Detected	-0.13553	0.32575	45.4	38.8	31.7	36	A_33_P3303302	Unknown
A_33_P3303361	-0.254481	Compromised	0.254481	Compromised	1.2e-07	-1.82489	Compromised	-0.922133	Compromised	-1.37351	0.117719	6.66	9.34	1.82	3.98	A_33_P3303361	Unknown
A_33_P3303394	0.0693264	Detected	-0.0693269	Detected	-2.4e-07	0.131309	Detected	0.0943875	Detected	0.112848	0.256364	7920	7090	6710	7650	A_33_P3303394	Unknown
A_33_P3303469	-0.0172143	Detected	0.0172143	Detected	0	-0.678176	Detected	-0.0599904	Detected	-0.369083	0.355446	75.2	75.9	38.6	69.3	A_33_P3303469	Unknown
A_33_P3303557	0.57159	Detected	-0.57159	Compromised	0	-0.316274	Compromised	-0.445631	Compromised	-0.380952	0.575913	17.1	7.63	7.5	8.02	A_33_P3303557	Unknown
A_33_P3303562	0.0960708	Detected	-0.0960708	Detected	0	-0.0789967	Detected	-0.21798	Detected	-0.148488	0.337041	31.3	27	22.5	23.9	A_33_P3303562	Unknown
A_33_P3303752	-0.792975	Compromised	0.792976	Compromised	2.5e-07	-0.529674	Compromised	0.397028	Compromised	-0.0663228	0.949003	1.93	5.71	1.88	4.18	A_33_P3303752	Unknown
A_33_P3304092	0.40969	Compromised	-0.40969	Compromised	0	-1.01695	Compromised	-0.791387	Compromised	-0.90417	0.167169	8.38	4.68	2.53	3.46	A_33_P3304092	Unknown
A_33_P3304097	-0.117545	Detected	0.117545	Detected	0	-1.28138	Detected	0.403532	Detected	-0.438923	0.657232	51.9	60.2	18.8	70.7	A_33_P3304097	Unknown
A_33_P3304182	-0.0524149	Compromised	0.0524149	Compromised	0	0.168136	Compromised	0.220223	Compromised	0.19418	0.0800883	1.84	1.95	1.74	2.11	A_33_P3304182	Unknown
A_33_P3304369	-0.0483806	Detected	0.0483806	Detected	0	-0.199979	Detected	-0.143204	Detected	-0.171592	0.0923081	297	313	217	264	A_33_P3304369	Unknown
A_33_P3304402	-0.0526371	Compromised	0.0526371	Compromised	0	0.208566	Compromised	-0.0669708	Compromised	0.0707977	0.678571	1.83	1.94	1.78	1.72	A_33_P3304402	Unknown
A_33_P3304748	-0.0249579	Detected	0.0249579	Detected	0	-0.111559	Detected	0.331679	Detected	0.11006	0.670527	29.7	30.3	22.7	36.1	A_33_P3304748	Unknown
A_33_P3304769	-0.166188	Compromised	0.166188	Compromised	0	0.041369	Compromised	1.02497	Compromised	0.53317	0.412373	1.91	2.37	1.79	4.14	A_33_P3304769	Unknown
A_33_P3304998	-0.0512953	Compromised	0.0512958	Compromised	2.385e-07	0.172338	Compromised	-0.00157928	Compromised	0.0853794	0.486781	1.72	1.82	1.63	1.69	A_33_P3304998	Unknown
A_33_P3305250	0.11691	Detected	-0.11691	Detected	0	-0.564503	Detected	-0.779076	Detected	-0.67179	0.051517	24.7	20.7	12.5	12.6	A_33_P3305250	Unknown
A_33_P3305335	-0.0467873	Compromised	0.0467868	Compromised	-2.385e-07	0.17017	Compromised	-0.103993	Compromised	0.0330884	0.840535	1.94	2.04	1.83	1.77	A_33_P3305335	Unknown
A_33_P3305438	0.186549	Detected	-0.186549	Detected	0	-1.17946	Detected	-0.340236	Detected	-0.759847	0.239817	34.3	26.1	10.8	22.6	A_33_P3305438	Unknown
A_33_P3305462	-0.163787	Compromised	0.163787	Compromised	-2.35e-07	-0.0642514	Compromised	-0.282327	Compromised	-0.173289	0.471375	2.07	2.56	1.8	1.81	A_33_P3305462	Unknown
A_33_P3305526	-0.0391026	Compromised	0.0391026	Compromised	0	0.17187	Compromised	-0.0776577	Compromised	0.047106	0.753128	1.98	2.06	1.86	1.83	A_33_P3305526	Unknown
A_33_P3305710	0.701249	Compromised	-0.701249	Compromised	2.25e-07	1.08417	Compromised	-0.821413	Compromised	0.13138	0.921714	5.66	2.11	5.99	1.87	A_33_P3305710	Unknown
A_33_P3305820	1.71103	Detected	-1.71103	Compromised	-2.5e-07	-1.53099	Compromised	-1.78929	Compromised	-1.66014	0.435361	21.1	1.94	1.81	1.77	A_33_P3305820	Unknown
A_33_P3306063	-0.0512953	Compromised	0.0512958	Compromised	2.385e-07	0.189932	Compromised	0.0404844	Compromised	0.115208	0.331525	1.72	1.82	1.65	1.74	A_33_P3306063	Unknown
A_33_P3306327	0.0454156	Detected	-0.0454156	Detected	0	-0.218064	Detected	0.043113	Detected	-0.0874755	0.591627	1340	1240	906	1270	A_33_P3306327	Unknown
A_33_P3306339	0.0067687	Compromised	-0.0067687	Compromised	0	0.179296	Compromised	-0.0923343	Compromised	0.0434811	0.779468	2.11	2.06	1.93	1.87	A_33_P3306339	Unknown
A_33_P3306363	-0.0850072	Compromised	0.0850074	Detected	1.2e-07	-0.139676	Compromised	0.634255	Detected	0.247289	0.596226	9.47	10.5	7.4	14.8	A_33_P3306363	Unknown
A_33_P3306526	0.0627661	Detected	-0.0627651	Detected	4.775e-07	0.374353	Detected	0.130882	Detected	0.252618	0.206428	41400	37400	41700	41200	A_33_P3306526	Unknown
A_33_P3307063	0.393681	Compromised	-0.393681	Compromised	0	0.728599	Compromised	-0.266762	Compromised	0.230919	0.7508	3.38	1.93	3.46	2.03	A_33_P3307063	Unknown
A_33_P3307088	-0.294146	Compromised	0.294145	Compromised	-2.4e-07	-0.127461	Compromised	-0.328867	Compromised	-0.228164	0.5394	1.91	2.83	1.74	1.77	A_33_P3307088	Unknown
A_33_P3307192	-0.222567	Compromised	0.222566	Compromised	-2.35e-07	-0.0985894	Compromised	0.410667	Compromised	0.156039	0.689833	1.99	2.67	1.76	2.93	A_33_P3307192	Unknown
A_33_P3307402	-0.0582404	Detected	0.0582404	Detected	0	-0.638751	Detected	-0.605576	Detected	-0.622164	0.00934099	23.4	25	12.7	15.2	A_33_P3307402	Unknown
A_33_P3307408	0.458922	Compromised	-0.458922	Compromised	0	-0.319135	Compromised	-0.576568	Compromised	-0.447851	0.446602	3.93	2.05	1.86	1.82	A_33_P3307408	Unknown
A_33_P3308147	-0.202787	Compromised	0.202787	Compromised	-2.4e-07	-0.0277944	Compromised	-0.325416	Compromised	-0.176605	0.555313	2.03	2.65	1.86	1.77	A_33_P3308147	Unknown
A_33_P3308153	-0.125044	Detected	0.125044	Detected	0	0.144762	Detected	0.165787	Detected	0.155274	0.341508	186	218	182	216	A_33_P3308153	Unknown
A_33_P3309643	-0.00103903	Detected	0.00103903	Detected	0	0.355627	Detected	0.276106	Detected	0.315866	0.0154883	153	151	159	176	A_33_P3309643	Unknown
A_33_P3309656	-0.0545044	Compromised	0.0545049	Compromised	2.375e-07	0.170494	Compromised	-0.00434923	Compromised	0.0830722	0.504676	1.75	1.86	1.66	1.72	A_33_P3309656	Unknown
A_33_P3309849	-0.0902085	Detected	0.0902085	Detected	0	-0.484485	Detected	-0.0797162	Detected	-0.2821	0.330934	137	153	84.6	131	A_33_P3309849	Unknown
A_33_P3310198	-0.0517616	Compromised	0.0517616	Compromised	0	0.161945	Compromised	0.00626612	Compromised	0.0841057	0.463219	1.7	1.8	1.6	1.68	A_33_P3310198	Unknown
A_33_P3310296	0.0311773	Detected	-0.0311773	Detected	0	0.867841	Detected	0.324032	Detected	0.595937	0.161358	35.6	33.6	51.6	41.4	A_33_P3310296	Unknown
A_33_P3310327	-0.0479145	Compromised	0.0479145	Compromised	0	0.158098	Compromised	-0.0927739	Compromised	0.0326622	0.830488	1.88	1.98	1.76	1.73	A_33_P3310327	Unknown
A_33_P3310401	0.555091	Compromised	-0.555092	Compromised	-2.3e-07	-0.274983	Compromised	-0.628666	Compromised	-0.451825	0.519157	4.14	1.89	1.89	1.73	A_33_P3310401	Unknown
A_33_P3310409	-0.0105305	Compromised	0.0105309	Compromised	2.385e-07	0.194177	Compromised	0.277705	Compromised	0.235941	0.0317468	2.01	2.01	1.88	2.33	A_33_P3310409	Unknown
A_33_P3310512	0.128978	Detected	-0.128978	Detected	0	0.0671406	Detected	-0.321012	Detected	-0.126936	0.640561	47.2	38.9	36.7	32.8	A_33_P3310512	Unknown
A_33_P3310751	0.0919218	Detected	-0.0919218	Detected	0	-0.463476	Detected	0.0133433	Detected	-0.225066	0.47132	57.4	49.8	31.7	51.6	A_33_P3310751	Unknown
A_33_P3310754	0.602471	Detected	-0.602471	Compromised	-1.25e-07	-1.93286	Compromised	-0.893035	Compromised	-1.41295	0.217798	12	5.13	1.68	4.04	A_33_P3310754	Unknown
A_33_P3311001	-0.751357	Compromised	0.751357	Compromised	0	-0.830459	Compromised	-1.09521	Compromised	-0.962833	0.33418	2.46	6.87	1.89	1.84	A_33_P3311001	Unknown
A_33_P3311308	0.180324	Compromised	-0.180324	Compromised	0	-0.0537605	Compromised	-0.326878	Compromised	-0.190319	0.488698	2.71	2.08	1.87	1.81	A_33_P3311308	Unknown
A_33_P3311458	0.114149	Detected	-0.114149	Detected	0	-0.418322	Detected	-0.467906	Detected	-0.443114	0.0629958	1260	1060	707	799	A_33_P3311458	Unknown
A_33_P3311646	0.0715294	Detected	-0.0715289	Detected	2.4e-07	0.155468	Detected	-0.29801	Detected	-0.0712709	0.792639	2790	2490	2400	2050	A_33_P3311646	Unknown
A_33_P3311648	-0.0499587	Compromised	0.0499582	Compromised	-2.38e-07	0.184869	Compromised	-0.0327382	Compromised	0.0760653	0.590204	1.78	1.88	1.7	1.71	A_33_P3311648	Unknown
A_33_P3311711	0.0136895	Compromised	-0.013689	Compromised	2.385e-07	0.171902	Compromised	-0.0845404	Compromised	0.0436807	0.767064	2.12	2.05	1.92	1.88	A_33_P3311711	Unknown
A_33_P3311855	-0.0521946	Compromised	0.0521951	Compromised	2.385e-07	0.185199	Compromised	-0.0822101	Compromised	0.0514946	0.754102	1.85	1.96	1.77	1.72	A_33_P3311855	Unknown
A_33_P3311911	0.110254	Compromised	-0.110254	Compromised	-2.4e-07	0.408331	Compromised	0.191521	Compromised	0.299926	0.191955	4.67	3.95	4.66	4.69	A_33_P3311911	Unknown
A_33_P3311920	-0.348612	Compromised	0.348612	Compromised	0	-0.125869	Compromised	-0.149253	Compromised	-0.137561	0.731384	1.89	3.02	1.79	2.06	A_33_P3311920	Unknown
A_33_P3311966	0.507184	Compromised	-0.507185	Compromised	-2.5e-07	1.11228	Compromised	-0.560673	Compromised	0.275805	0.804484	3.71	1.81	4.58	1.68	A_33_P3311966	Unknown
A_33_P3312044	-0.0772724	Compromised	0.0772719	Compromised	-2.375e-07	0.19415	Compromised	0.906681	Compromised	0.550416	0.270156	1.96	2.15	1.92	3.68	A_33_P3312044	Unknown
A_33_P3312147	0.842534	Detected	-0.842534	Compromised	0	-1.38622	Compromised	-1.71624	Compromised	-1.55123	0.212533	10.8	3.31	1.87	1.74	A_33_P3312147	Unknown
A_33_P3312187	-0.532842	Compromised	0.532842	Compromised	0	1.02379	Compromised	0.647825	Compromised	0.835807	0.277187	1.91	3.94	4.56	4.11	A_33_P3312187	Unknown
A_33_P3312251	-0.244093	Compromised	0.244094	Compromised	2.4e-07	-0.851583	Compromised	0.728438	Compromised	-0.0615723	0.947418	3.06	4.23	1.63	5.7	A_33_P3312251	Unknown
A_33_P3312342	-0.0217147	Compromised	0.0217147	Compromised	0	1.50185	Compromised	2.46278	Detected	1.98231	0.0541308	1.92	1.95	4.48	10.2	A_33_P3312342	Unknown
A_33_P3312436	-0.0388222	Compromised	0.0388227	Compromised	2.38e-07	0.177459	Compromised	0.0280113	Compromised	0.102735	0.346791	1.75	1.82	1.65	1.74	A_33_P3312436	Unknown
A_33_P3312774	0.130176	Compromised	-0.130176	Compromised	0	0.00203419	Compromised	-0.240523	Compromised	-0.119244	0.571738	2.37	1.95	1.76	1.74	A_33_P3312774	Unknown
A_33_P3312784	0.261514	Detected	-0.261514	Detected	0	-1.0729	Compromised	-0.871111	Detected	-0.972008	0.0740427	26.1	17.9	8.4	11.3	A_33_P3312784	Unknown
A_33_P3312886	0.383317	Compromised	-0.383318	Compromised	-2.4e-07	-0.2468	Compromised	-0.431528	Compromised	-0.339164	0.480333	3.28	1.9	1.72	1.77	A_33_P3312886	Unknown
A_33_P3313075	0.487463	Compromised	-0.487463	Compromised	2.4e-07	-0.36829	Compromised	-0.137373	Compromised	-0.252831	0.663883	3.59	1.8	1.61	2.21	A_33_P3313075	Unknown
A_33_P3313095	0.950468	Compromised	-0.950468	Compromised	0	-0.805587	Compromised	-0.54742	Compromised	-0.676504	0.553709	7.2	1.9	1.73	2.42	A_33_P3313095	Unknown
A_33_P3313323	0.0853643	Compromised	-0.0853648	Compromised	-2.4e-07	0.0809751	Compromised	-0.221043	Compromised	-0.0700338	0.725488	2.41	2.11	1.95	1.85	A_33_P3313323	Unknown
A_33_P3313552	-0.165565	Compromised	0.165565	Compromised	0	0.0576029	Compromised	0.804567	Compromised	0.431085	0.401983	1.71	2.12	1.62	3.18	A_33_P3313552	Unknown
A_33_P3313625	-0.0858703	Detected	0.0858703	Detected	0	-0.906146	Compromised	-0.725842	Compromised	-0.815994	0.0224977	10.9	12.1	5.01	6.64	A_33_P3313625	Unknown
A_33_P3313640	-0.442855	Compromised	0.442855	Compromised	0	-0.207774	Compromised	1.26428	Compromised	0.528255	0.60122	2.01	3.66	1.92	6.23	A_33_P3313640	Unknown
A_33_P3313652	0.24785	Detected	-0.24785	Detected	0	0.177951	Detected	-0.129561	Detected	0.0241952	0.941443	75.4	52.7	58.3	55.1	A_33_P3313652	Unknown
A_33_P3313695	-0.366106	Compromised	0.366107	Detected	2.35e-07	-1.9402	Compromised	-0.75014	Compromised	-1.34517	0.194042	6.09	9.97	1.66	4.43	A_33_P3313695	Unknown
A_33_P3314121	-0.021657	Compromised	0.0216575	Compromised	2.385e-07	0.138267	Compromised	0.397625	Compromised	0.267946	0.17843	1.93	1.96	1.75	2.45	A_33_P3314121	Unknown
A_33_P3314352	-0.0808296	Compromised	0.0808301	Compromised	2.4e-07	-0.77286	Compromised	0.183505	Compromised	-0.294677	0.605239	6.35	7	3.19	7.24	A_33_P3314352	Unknown
A_33_P3314574	0.311701	Compromised	-0.311701	Compromised	-2.4e-07	0.916221	Compromised	0.436925	Compromised	0.676573	0.227431	5.94	3.8	7.33	6.15	A_33_P3314574	Unknown
A_33_P3314828	-0.0355926	Compromised	0.0355926	Compromised	0	0.128074	Compromised	-0.15522	Compromised	-0.0135729	0.934428	1.98	2.05	1.8	1.73	A_33_P3314828	Unknown
A_33_P3315074	-0.0619104	Detected	0.0619104	Detected	0	-0.419194	Detected	0.05141	Detected	-0.183892	0.528662	149	160	94.4	153	A_33_P3315074	Unknown
A_33_P3315154	2.3982	Detected	-2.3982	Compromised	0	-2.26747	Compromised	-2.42523	Compromised	-2.34635	0.43127	51.6	1.83	1.65	1.73	A_33_P3315154	Unknown
A_33_P3315624	-0.0475311	Compromised	0.0475307	Compromised	-2.39e-07	0.166703	Compromised	0.0191088	Compromised	0.092906	0.400817	1.71	1.8	1.61	1.7	A_33_P3315624	Unknown
A_33_P3315634	0.03142	Detected	-0.03142	Detected	0	0.265864	Detected	-0.132265	Detected	0.0667992	0.771805	35.4	33.4	33.8	30	A_33_P3315634	Unknown
A_33_P3315659	-0.0276661	Compromised	0.0276656	Compromised	-2.385e-07	0.187774	Compromised	-0.113845	Compromised	0.0369644	0.831952	2.08	2.13	1.96	1.86	A_33_P3315659	Unknown
A_33_P3315704	-0.36709	Compromised	0.36709	Detected	-1.15e-07	0.313198	Detected	-0.277868	Detected	0.0176649	0.973504	9.15	15	11.9	9.24	A_33_P3315704	Unknown
A_33_P3315724	-0.0552483	Compromised	0.0552483	Compromised	0	0.185979	Compromised	-0.0140944	Compromised	0.0859423	0.530486	1.72	1.83	1.65	1.68	A_33_P3315724	Unknown
A_33_P3315763	0.0574865	Detected	-0.0574875	Detected	-4.77e-07	0.246645	Detected	0.117815	Detected	0.18223	0.169239	58900	53600	54500	58300	A_33_P3315763	Unknown
A_33_P3315824	0.00325346	Detected	-0.00325346	Detected	0	0.0128922	Detected	-0.2413	Detected	-0.114204	0.463841	31.7	31.1	25.9	25.4	A_33_P3315824	Unknown
A_33_P3315836	-0.111348	Detected	0.111348	Detected	0	-1.7728	Compromised	-1.29209	Detected	-1.53244	0.028604	32	36.8	8.21	13.4	A_33_P3315836	Unknown
A_33_P3315899	0.00329757	Detected	-0.00329757	Detected	0	0.578116	Detected	0.396671	Detected	0.487393	0.0329863	1580	1550	1910	1970	A_33_P3315899	Unknown
A_33_P3315915	-0.447765	Detected	0.447765	Detected	0	-0.208734	Detected	-0.34465	Detected	-0.276692	0.603422	10.2	18.7	9.77	10.4	A_33_P3315915	Unknown
A_33_P3315986	-0.280166	Detected	0.280166	Detected	1.25e-07	0.0518098	Detected	-0.417115	Detected	-0.182653	0.666686	13.9	20.2	14.2	12	A_33_P3315986	Unknown
A_33_P3316093	-0.0660467	Compromised	0.0660462	Compromised	-2.375e-07	0.19118	Compromised	-0.0879068	Compromised	0.0516365	0.769844	2	2.16	1.94	1.87	A_33_P3316093	Unknown
A_33_P3316178	-0.512649	Compromised	0.51265	Compromised	2.4e-07	-0.28102	Compromised	-0.181603	Compromised	-0.231312	0.697332	1.7	3.41	1.62	2.03	A_33_P3316178	Unknown
A_33_P3316248	0.111679	Detected	-0.111679	Detected	0	-0.0990503	Detected	-0.209642	Detected	-0.154346	0.34116	15.4	13	10.8	11.7	A_33_P3316248	Unknown
A_33_P3316261	-0.0493221	Compromised	0.0493226	Compromised	2.375e-07	0.169855	Compromised	-0.0562139	Compromised	0.0568204	0.690239	1.81	1.91	1.71	1.71	A_33_P3316261	Unknown
A_33_P3316379	0.0326548	Detected	-0.0326543	Detected	2.385e-07	0.340795	Detected	0.303455	Detected	0.322125	0.0133629	4130	3890	4150	4730	A_33_P3316379	Unknown
A_33_P3316572	-0.0508399	Compromised	0.0508399	Compromised	0	0.173708	Compromised	0.00758266	Compromised	0.0906456	0.450228	1.74	1.84	1.65	1.72	A_33_P3316572	Unknown
A_33_P3316671	0.0108442	Detected	-0.0108442	Detected	0	-0.294165	Detected	0.147785	Detected	-0.0731897	0.772227	137	133	90	143	A_33_P3316671	Unknown
A_33_P3316691	-0.100764	Detected	0.100764	Detected	0	-0.147354	Detected	-0.579521	Detected	-0.363438	0.266908	80.3	91	63.1	54.7	A_33_P3316691	Unknown
A_33_P3316696	0.0616643	Detected	-0.0616643	Detected	0	0.0679295	Detected	-0.29862	Detected	-0.115345	0.611367	35.7	32.3	29.1	26.4	A_33_P3316696	Unknown
A_33_P3317460	0.0083909	Detected	-0.0083909	Detected	0	-0.0946231	Detected	0.118091	Detected	0.011734	0.922463	61.8	60.2	46.7	63.3	A_33_P3317460	Unknown
A_33_P3317548	-0.626467	Compromised	0.626467	Compromised	0	-0.385733	Compromised	1.5624	Compromised	0.588335	0.661937	1.95	4.58	1.87	8.44	A_33_P3317548	Unknown
A_33_P3317761	-0.151477	Detected	0.151477	Detected	0	0.0955367	Detected	-0.306382	Detected	-0.105422	0.715979	19	23.1	18.3	16.2	A_33_P3317761	Unknown
A_33_P3318069	0.209755	Compromised	-0.209755	Compromised	0	0.321892	Compromised	1.23894	Compromised	0.780414	0.261762	3.99	2.94	3.5	7.73	A_33_P3318069	Unknown
A_33_P3318227	-0.0491147	Compromised	0.0491147	Compromised	0	0.203692	Compromised	-0.0388646	Compromised	0.0824139	0.593153	1.82	1.92	1.76	1.74	A_33_P3318227	Unknown
A_33_P3318377	-0.132898	Detected	0.132898	Detected	0	0.106345	Detected	0.0917802	Detected	0.0990624	0.534272	119	141	114	132	A_33_P3318377	Unknown
A_33_P3318384	-0.245602	Detected	0.245602	Detected	-1.2e-07	-0.699246	Compromised	0.14669	Detected	-0.276278	0.629073	12.2	16.9	7.23	15.2	A_33_P3318384	Unknown
A_33_P3318736	0.440737	Compromised	-0.440736	Compromised	2.35e-07	-0.313437	Compromised	-0.476426	Compromised	-0.394931	0.471188	3.72	1.99	1.79	1.87	A_33_P3318736	Unknown
A_33_P3318766	0.206296	Detected	-0.206296	Detected	0	-0.341225	Detected	-0.0881252	Detected	-0.214675	0.468651	41.6	30.8	23.1	32.2	A_33_P3318766	Unknown
A_33_P3318781	-0.0512953	Compromised	0.0512958	Compromised	2.385e-07	0.189932	Compromised	0.424089	Compromised	0.307011	0.13828	1.72	1.82	1.65	2.27	A_33_P3318781	Unknown
A_33_P3319502	-0.0870066	Detected	0.0870066	Detected	0	-0.126874	Detected	-0.305637	Detected	-0.216255	0.22511	152	169	120	124	A_33_P3319502	Unknown
A_33_P3319937	0.0680017	Detected	-0.0680013	Detected	2.4e-07	-0.00644922	Detected	-0.195456	Detected	-0.100953	0.477298	34900	31300	26900	27600	A_33_P3319937	Unknown
A_33_P3319953	0.790755	Compromised	-0.790755	Compromised	0	1.28582	Compromised	0.383427	Compromised	0.834624	0.456054	5.77	1.9	6.6	4.13	A_33_P3319953	Unknown
A_33_P3320241	-0.495344	Compromised	0.495344	Compromised	2.3e-07	-0.404097	Compromised	-0.562262	Compromised	-0.483179	0.437059	1.92	3.76	1.66	1.74	A_33_P3320241	Unknown
A_33_P3320283	-0.0597324	Compromised	0.0597324	Compromised	0	0.762783	Compromised	1.63664	Compromised	1.19971	0.112726	1.7	1.82	2.44	5.23	A_33_P3320283	Unknown
A_33_P3320408	0.125852	Compromised	-0.125853	Compromised	-2.35e-07	-0.0584049	Compromised	0.182652	Compromised	0.0621238	0.75556	2.38	1.97	1.7	2.35	A_33_P3320408	Unknown
A_33_P3320415	0.0760016	Compromised	-0.0760021	Compromised	-2.38e-07	-0.906076	Compromised	-0.489816	Compromised	-0.697946	0.0877246	4.6	4.08	1.89	2.95	A_33_P3320415	Unknown
A_33_P3320418	-0.0772724	Compromised	0.0772719	Compromised	-2.375e-07	0.19415	Compromised	3.23643	Detected	1.71529	0.377056	1.96	2.15	1.92	18.5	A_33_P3320418	Unknown
A_33_P3320698	-0.451341	Compromised	0.451341	Compromised	0	0.0649133	Compromised	0.977801	Compromised	0.521357	0.50198	3.11	5.73	3.61	7.95	A_33_P3320698	Unknown
A_33_P3320708	-0.0407486	Compromised	0.0407491	Compromised	2.385e-07	0.181133	Compromised	-0.0287256	Compromised	0.0762036	0.568225	1.87	1.95	1.77	1.79	A_33_P3320708	Unknown
A_33_P3321120	-0.743092	Compromised	0.743092	Compromised	-2.3e-07	1.54231	Compromised	-0.765288	Compromised	0.388511	0.803717	1.84	5.08	7.28	1.72	A_33_P3321120	Unknown
A_33_P3321382	0.214977	Compromised	-0.214978	Compromised	-2.4e-07	-0.774149	Compromised	0.57311	Compromised	-0.10052	0.899984	4.06	2.97	1.66	4.94	A_33_P3321382	Unknown
A_33_P3321564	-0.832184	Compromised	0.832184	Compromised	-2.3e-07	-0.802317	Compromised	0.352039	Compromised	-0.225139	0.844714	2.1	6.56	1.74	4.53	A_33_P3321564	Unknown
A_33_P3321682	0.119291	Detected	-0.119292	Detected	-2.37e-07	0.445698	Detected	0.244433	Detected	0.345066	0.157587	17000	14200	17300	17600	A_33_P3321682	Unknown
A_33_P3321689	0.11942	Detected	-0.11942	Detected	0	0.0702887	Detected	0.124916	Detected	0.0976024	0.509161	55.2	46.1	43.3	52.6	A_33_P3321689	Unknown
A_33_P3321934	-0.0174007	Compromised	0.0174007	Compromised	0	0.9118	Compromised	-0.102764	Compromised	0.404518	0.509056	2.09	2.11	3.23	1.87	A_33_P3321934	Unknown
A_33_P3322103	-0.139767	Compromised	0.139767	Compromised	1.15e-07	0.117802	Compromised	0.0443401	Compromised	0.081071	0.631269	7.39	8.84	7.17	7.97	A_33_P3322103	Unknown
A_33_P3322211	0.206644	Compromised	-0.206644	Compromised	0	-1.61429	Compromised	-0.985661	Compromised	-1.29998	0.0744934	7.27	5.38	1.67	3.02	A_33_P3322211	Unknown
A_33_P3322430	0.127804	Detected	-0.127804	Detected	0	-0.00765109	Detected	0.193949	Detected	0.0931489	0.624892	808	667	597	803	A_33_P3322430	Unknown
A_33_P3322460	0.132424	Detected	-0.132424	Detected	0	0.00770879	Detected	-0.207512	Detected	-0.0999017	0.617491	35.6	29.2	26.5	26.7	A_33_P3322460	Unknown
A_33_P3322504	0.017761	Detected	-0.017761	Detected	0	0.124019	Detected	0.0526736	Detected	0.0883465	0.156925	36.4	35	31.8	35.4	A_33_P3322504	Unknown
A_33_P3322730	0.182894	Detected	-0.182894	Detected	0	-1.22766	Detected	-0.287074	Detected	-0.757365	0.272185	64.2	49.1	19.6	44	A_33_P3322730	Unknown
A_33_P3322884	-0.0519772	Compromised	0.0519772	Compromised	0	0.169466	Compromised	-0.0814066	Compromised	0.0440295	0.776504	1.86	1.97	1.76	1.73	A_33_P3322884	Unknown
A_33_P3323544	-0.0346355	Compromised	0.0346351	Compromised	-2.385e-07	0.164996	Compromised	-0.146189	Compromised	0.00940347	0.958321	2.06	2.13	1.92	1.81	A_33_P3323544	Unknown
A_33_P3323641	-0.263065	Compromised	0.263066	Compromised	2.35e-07	0.583673	Compromised	-0.30162	Compromised	0.141027	0.809869	1.98	2.81	2.89	1.83	A_33_P3323641	Unknown
A_33_P3323687	-0.0549979	Compromised	0.0549974	Compromised	-2.38e-07	0.195248	Compromised	-0.00513363	Compromised	0.0950573	0.493067	1.73	1.84	1.67	1.7	A_33_P3323687	Unknown
A_33_P3323892	-0.0477219	Compromised	0.0477214	Compromised	-2.385e-07	0.175021	Compromised	-0.083652	Compromised	0.0456846	0.771854	1.89	1.99	1.79	1.75	A_33_P3323892	Unknown
A_33_P3323914	0.369836	Detected	-0.369836	Compromised	0	-1.19406	Compromised	0.253101	Detected	-0.470482	0.621128	10.2	6.02	2.8	8.93	A_33_P3323914	Unknown
A_33_P3323975	-0.0457253	Compromised	0.0457253	Compromised	0	1.34479	Compromised	3.1993	Detected	2.27205	0.134167	1.8	1.89	3.83	16.2	A_33_P3323975	Unknown
A_33_P3323989	-0.399334	Compromised	0.399335	Compromised	2.35e-07	-0.190358	Compromised	1.35598	Compromised	0.582813	0.571992	2.1	3.6	1.97	6.73	A_33_P3323989	Unknown
A_33_P3324149	-0.26342	Detected	0.26342	Detected	0	-0.332813	Detected	0.328644	Detected	-0.00208473	0.996514	18.1	25.7	14	25.9	A_33_P3324149	Unknown
A_33_P3324284	-0.0479145	Compromised	0.0479145	Compromised	0	0.1744	Compromised	-0.0844588	Compromised	0.0449705	0.775478	1.88	1.98	1.78	1.74	A_33_P3324284	Unknown
A_33_P3324552	0.0326648	Detected	-0.0326648	Detected	0	-0.0479197	Detected	0.119156	Detected	0.0356183	0.729666	75.7	71.3	58.1	76.3	A_33_P3324552	Unknown
A_33_P3324675	0.172533	Detected	-0.172533	Detected	0	0.667385	Detected	0.758887	Detected	0.713136	0.0573156	17.4	13.5	19.9	24.8	A_33_P3324675	Unknown
A_33_P3324680	-0.269184	Compromised	0.269184	Compromised	0	-0.340384	Compromised	-0.488916	Compromised	-0.41465	0.275863	2.11	3.02	1.63	1.72	A_33_P3324680	Unknown
A_33_P3324781	0.232183	Detected	-0.232183	Detected	-1.2e-07	-0.343455	Detected	0.239777	Detected	-0.0518388	0.902136	17.5	12.5	9.53	16.7	A_33_P3324781	Unknown
A_33_P3324899	0.492968	Detected	-0.492968	Compromised	1.2e-07	-0.542407	Compromised	0.773745	Detected	0.115669	0.901016	12.4	6.17	4.91	14.3	A_33_P3324899	Unknown
A_33_P3324904	-0.023242	Detected	0.023242	Detected	0	-0.535853	Detected	-0.807726	Detected	-0.67179	0.0396525	22.5	22.9	12.8	12.4	A_33_P3324904	Unknown
A_33_P3324974	-0.051527	Compromised	0.0515275	Compromised	2.385e-07	0.17164	Compromised	1.22777	Compromised	0.699707	0.318003	1.71	1.81	1.62	3.94	A_33_P3324974	Unknown
A_33_P3325250	0.181475	Compromised	-0.181474	Compromised	2.4e-07	-0.525217	Compromised	-0.0143199	Compromised	-0.269768	0.48001	3.68	2.82	1.83	3.05	A_33_P3325250	Unknown
A_33_P3325330	0.251093	Compromised	-0.251092	Compromised	2.35e-07	0.0648169	Compromised	-0.349861	Compromised	-0.142522	0.70435	2.86	1.99	2.04	1.79	A_33_P3325330	Unknown
A_33_P3325826	-0.0597324	Compromised	0.0597324	Compromised	0	0.207086	Compromised	-0.00170469	Compromised	0.10269	0.483164	1.7	1.82	1.66	1.68	A_33_P3325826	Unknown
A_33_P3325948	-0.0449781	Compromised	0.0449781	Compromised	0	0.167258	Compromised	-0.067174	Compromised	0.0500419	0.728727	1.84	1.93	1.73	1.72	A_33_P3325948	Unknown
A_33_P3326151	-0.120484	Detected	0.120484	Detected	0	-0.0928156	Detected	0.298396	Detected	0.10279	0.698356	24.9	29	20.6	31.6	A_33_P3326151	Unknown
A_33_P3326312	0.083879	Detected	-0.083879	Detected	0	0.0278316	Detected	0.137366	Detected	0.0825989	0.496319	269	236	210	265	A_33_P3326312	Unknown
A_33_P3326439	-0.0510669	Compromised	0.0510664	Compromised	-2.375e-07	0.164203	Compromised	-0.00971413	Compromised	0.0772445	0.523742	1.73	1.83	1.63	1.69	A_33_P3326439	Unknown
A_33_P3326802	-0.0202131	Compromised	0.0202131	Compromised	0	-0.77585	Compromised	-0.548292	Compromised	-0.662071	0.0291404	5.18	5.25	2.49	3.41	A_33_P3326802	Unknown
A_33_P3326817	-0.00297713	Detected	0.00297713	Detected	0	-0.178246	Detected	-0.479415	Detected	-0.32883	0.160695	1920	1900	1380	1310	A_33_P3326817	Unknown
A_33_P3326827	-0.227902	Compromised	0.227902	Compromised	0	0.018384	Compromised	-0.55936	Compromised	-0.270488	0.538779	5.09	6.88	4.9	3.84	A_33_P3326827	Unknown
A_33_P3326872	-0.224137	Compromised	0.224137	Detected	0	-1.10517	Compromised	-0.1887	Compromised	-0.646935	0.332368	8.85	11.9	3.9	8.61	A_33_P3326872	Unknown
A_33_P3326898	-0.100472	Detected	0.100472	Detected	0	0.157037	Detected	-0.249067	Detected	-0.0460148	0.857837	36.9	41.8	35.8	31.6	A_33_P3326898	Unknown
A_33_P3326942	0.176456	Compromised	-0.176457	Compromised	-2.4e-07	-0.0598474	Compromised	-0.00241709	Compromised	-0.0311322	0.877789	2.54	1.96	1.75	2.13	A_33_P3326942	Unknown
A_33_P3327140	0.0697019	Detected	-0.0697019	Detected	0	-0.437433	Detected	-0.455426	Detected	-0.446429	0.0238985	1140	1020	651	752	A_33_P3327140	Unknown
A_33_P3327250	-0.0294952	Detected	0.0294952	Detected	0	0.00271511	Detected	0.151042	Detected	0.0768788	0.437065	48.8	50.1	40.5	52.5	A_33_P3327250	Unknown
A_33_P3327491	-0.199268	Detected	0.199268	Detected	0	-0.0901012	Detected	1.4757	Detected	0.692799	0.481489	32.1	41.7	28.1	97.3	A_33_P3327491	Unknown
A_33_P3327723	0.935395	Compromised	-0.935395	Compromised	2.4e-07	-0.798411	Compromised	-0.665849	Compromised	-0.73213	0.516694	6.68	1.8	1.63	2.09	A_33_P3327723	Unknown
A_33_P3327762	-0.083509	Detected	0.083509	Detected	0	-0.394993	Detected	0.142498	Detected	-0.126248	0.697635	26.3	29.1	17.2	29.2	A_33_P3327762	Unknown
A_33_P3327971	0.20331	Detected	-0.20331	Detected	0	-1.27853	Detected	-0.129092	Detected	-0.703813	0.367608	38.2	28.4	11.1	28.8	A_33_P3327971	Unknown
A_33_P3328274	-0.437256	Compromised	0.437256	Compromised	0	-0.186127	Compromised	-0.420707	Compromised	-0.303417	0.571743	1.76	3.18	1.7	1.69	A_33_P3328274	Unknown
A_33_P3328284	0.00317884	Detected	-0.00317884	Detected	0	0.0422728	Detected	0.0145857	Detected	0.0284293	0.183296	90.3	88.6	75.3	86.4	A_33_P3328284	Unknown
A_33_P3328289	-0.438211	Detected	0.438211	Detected	1.15e-07	-0.643501	Detected	-0.0796556	Detected	-0.361578	0.559495	15.2	27.5	10.7	18.5	A_33_P3328289	Unknown
A_33_P3328543	-0.0507174	Compromised	0.0507174	Compromised	0	0.165336	Compromised	-0.101147	Compromised	0.0320945	0.842797	1.92	2.03	1.81	1.76	A_33_P3328543	Unknown
A_33_P3328564	-0.0597324	Compromised	0.0597324	Compromised	0	0.198369	Compromised	0.00685739	Compromised	0.102613	0.459209	1.7	1.82	1.65	1.69	A_33_P3328564	Unknown
A_33_P3328569	-0.0668597	Compromised	0.0668597	Compromised	0	0.182114	Compromised	-0.0824289	Compromised	0.0498424	0.768653	1.97	2.13	1.9	1.85	A_33_P3328569	Unknown
A_33_P3328619	-0.10527	Detected	0.10527	Detected	-2.38e-07	0.293746	Detected	0.403728	Detected	0.348737	0.0990512	17100	19500	18300	23100	A_33_P3328619	Unknown
A_33_P3328751	-0.372654	Compromised	0.372654	Compromised	0	0.851894	Compromised	-0.516933	Compromised	0.167481	0.849758	3.19	5.27	6.05	2.74	A_33_P3328751	Unknown
A_33_P3328958	-0.0299754	Compromised	0.0299749	Compromised	-2.385e-07	0.164886	Compromised	-0.0111423	Compromised	0.0768716	0.495303	1.83	1.88	1.7	1.76	A_33_P3328958	Unknown
A_33_P3329038	0.718464	Compromised	-0.718464	Compromised	-2.5e-07	-0.597422	Compromised	-0.779902	Compromised	-0.688662	0.442024	5	1.82	1.63	1.68	A_33_P3329038	Unknown
A_33_P3329104	0.108775	Detected	-0.108775	Detected	-1.2e-07	-0.0649645	Detected	-0.242939	Detected	-0.153952	0.387625	16.4	13.9	11.8	12.2	A_33_P3329104	Unknown
A_33_P3329123	-0.326543	Compromised	0.326543	Compromised	0	-0.102956	Compromised	-0.31317	Compromised	-0.208063	0.605843	1.91	2.96	1.81	1.83	A_33_P3329123	Unknown
A_33_P3329133	0.101656	Compromised	-0.101655	Compromised	2.4e-07	-1.09572	Compromised	0.125389	Compromised	-0.485166	0.515224	4.86	4.16	1.72	4.69	A_33_P3329133	Unknown
A_33_P3329740	-0.02091	Detected	0.02091	Detected	0	-0.295324	Detected	-0.510528	Detected	-0.402926	0.0666913	1380	1400	926	933	A_33_P3329740	Unknown
A_33_P3329991	0.180879	Detected	-0.180879	Detected	0	0.101776	Detected	-0.137071	Detected	-0.0176475	0.942523	738	566	567	562	A_33_P3329991	Unknown
A_33_P3330084	-0.158079	Compromised	0.158078	Compromised	-2.35e-07	-1.29702	Compromised	-0.756517	Compromised	-1.02677	0.0817413	4.45	5.46	1.64	2.79	A_33_P3330084	Unknown
A_33_P3330236	-0.386257	Detected	0.386257	Detected	0	0.473158	Detected	0.173326	Detected	0.323242	0.51697	21.8	36.7	32.1	30.5	A_33_P3330236	Unknown
A_33_P3330413	0.0371923	Detected	-0.0371928	Detected	-2.375e-07	-0.397542	Detected	-0.407292	Detected	-0.402417	0.00857717	4530	4240	2720	3160	A_33_P3330413	Unknown
A_33_P3330761	-0.0317483	Compromised	0.0317483	Compromised	0	0.110223	Compromised	-0.17307	Compromised	-0.0314238	0.848691	2.01	2.07	1.8	1.73	A_33_P3330761	Unknown
A_33_P3330877	-0.510531	Detected	0.510531	Detected	1.25e-07	-0.669864	Compromised	-1.36029	Compromised	-1.01508	0.241298	10.1	20.2	7.34	5.32	A_33_P3330877	Unknown
A_33_P3330972	0.410699	Compromised	-0.410698	Compromised	2.5e-07	-0.280226	Compromised	1.17522	Compromised	0.447498	0.645864	3.64	2.03	1.83	5.87	A_33_P3330972	Unknown
A_33_P3331272	-0.0391431	Compromised	0.0391431	Compromised	0	0.149327	Compromised	0.00220966	Compromised	0.0757682	0.45917	1.73	1.8	1.6	1.69	A_33_P3331272	Unknown
A_33_P3331326	0.000829458	Detected	-0.000829458	Detected	0	0.20889	Detected	0.0417149	Detected	0.125303	0.272626	1280	1260	1200	1250	A_33_P3331326	Unknown
A_33_P3331391	-0.635024	Compromised	0.635024	Compromised	0	0.754004	Compromised	0.19173	Compromised	0.472867	0.566193	2.15	5.11	4.57	3.62	A_33_P3331391	Unknown
A_33_P3331731	-0.0362301	Compromised	0.0362306	Compromised	2.385e-07	0.542848	Compromised	-0.0697699	Compromised	0.236539	0.523311	1.93	2	2.34	1.79	A_33_P3331731	Unknown
A_33_P3331776	0.0763979	Detected	-0.0763979	Detected	0	-0.0292664	Detected	-0.325427	Detected	-0.177347	0.398672	64.3	57	48.5	46.2	A_33_P3331776	Unknown
A_33_P3331791	-0.0249102	Detected	0.0249102	Detected	0	0.351712	Detected	0.489234	Detected	0.420473	0.0289457	149	152	157	202	A_33_P3331791	Unknown
A_33_P3331911	-0.0495319	Compromised	0.0495319	Compromised	0	0.160665	Compromised	-0.0484309	Compromised	0.0561168	0.675557	1.8	1.9	1.69	1.71	A_33_P3331911	Unknown
A_33_P3331996	-0.0512953	Compromised	0.0512958	Compromised	2.385e-07	0.207314	Compromised	-0.00157928	Compromised	0.102867	0.469942	1.72	1.82	1.67	1.69	A_33_P3331996	Unknown
A_33_P3332046	0.385051	Compromised	-0.385051	Compromised	0	-0.613089	Compromised	-0.847195	Compromised	-0.730142	0.211308	4.43	2.56	1.8	1.79	A_33_P3332046	Unknown
A_33_P3332541	-0.0493221	Compromised	0.0493226	Compromised	2.375e-07	0.203213	Compromised	-0.0311232	Compromised	0.086045	0.568294	1.81	1.91	1.75	1.74	A_33_P3332541	Unknown
A_33_P3332749	7.7486e-05	Detected	-7.7486e-05	Detected	0	-0.411354	Compromised	-0.322414	Detected	-0.366884	0.0143759	13.7	13.5	8.36	10.4	A_33_P3332749	Unknown
A_33_P3332989	0.24627	Compromised	-0.24627	Compromised	2.4e-07	-0.762628	Compromised	0.410435	Compromised	-0.176097	0.807902	4.24	2.97	1.71	4.51	A_33_P3332989	Unknown
A_33_P3333003	0.363566	Detected	-0.363566	Detected	0	-1.97912	Compromised	-1.70664	Compromised	-1.84288	0.0416329	21.5	12.8	3.44	4.86	A_33_P3333003	Unknown
A_33_P3333058	-0.0636601	Detected	0.0636601	Detected	0	-0.68381	Compromised	-0.328983	Detected	-0.506397	0.11511	15.7	16.9	8.29	12.4	A_33_P3333058	Unknown
A_33_P3333187	0.0653281	Detected	-0.0653281	Detected	0	-0.2262	Detected	-0.376718	Detected	-0.301459	0.0941123	56.1	50.5	37.2	39.2	A_33_P3333187	Unknown
A_33_P3333327	-0.0449262	Compromised	0.0449259	Compromised	-1.195e-07	0.234269	Compromised	0.615138	Detected	0.424703	0.162143	8.6	9.02	8.47	12.9	A_33_P3333327	Unknown
A_33_P3333485	0.299025	Compromised	-0.299025	Compromised	-2.4e-07	0.321893	Compromised	-1.16926	Compromised	-0.423682	0.650565	5.13	3.34	4.23	1.76	A_33_P3333485	Unknown
A_33_P3333523	0.0673666	Detected	-0.0673661	Detected	2.4e-07	-0.168937	Detected	-0.330517	Detected	-0.249727	0.140883	2540	2280	1750	1830	A_33_P3333523	Unknown
A_33_P3333560	-0.158336	Detected	0.158336	Detected	0	-0.0746601	Detected	0.0569427	Detected	-0.00885868	0.963492	34.3	42.1	29.5	37.8	A_33_P3333560	Unknown
A_33_P3333677	-0.249155	Detected	0.249155	Detected	0	0.0311058	Detected	-0.232299	Detected	-0.100596	0.755273	27.8	38.7	27.4	26.7	A_33_P3333677	Unknown
A_33_P3333708	-0.0312331	Detected	0.0312331	Detected	0	0.0220101	Detected	-0.0756528	Detected	-0.0268214	0.689035	893	919	752	822	A_33_P3333708	Unknown
A_33_P3333985	-0.0257633	Detected	0.0257633	Detected	0	-0.163282	Detected	-0.280308	Detected	-0.221795	0.0739883	328	335	242	261	A_33_P3333985	Unknown
A_33_P3334000	0.578954	Compromised	-0.578955	Compromised	-2.5e-07	-0.0783992	Compromised	0.978386	Compromised	0.449994	0.623863	4.8	2.12	2.47	6.01	A_33_P3334000	Unknown
A_33_P3334043	-0.754998	Compromised	0.754999	Compromised	2.5e-07	-0.486995	Compromised	-0.747011	Compromised	-0.617003	0.505136	1.76	4.94	1.72	1.68	A_33_P3334043	Unknown
A_33_P3334121	-0.0391431	Compromised	0.0391431	Compromised	0	0.513899	Detected	0.895951	Detected	0.704925	0.0687233	8.65	9	10.3	15.7	A_33_P3334121	Unknown
A_33_P3334342	0.0120678	Detected	-0.0120678	Detected	0	0.39151	Detected	0.0682201	Detected	0.229865	0.291926	84.3	81.7	89	83.2	A_33_P3334342	Unknown
A_33_P3334428	0.170927	Compromised	-0.170927	Compromised	0	-1.37687	Compromised	0.171773	Compromised	-0.602546	0.526688	5.98	4.65	1.66	5.68	A_33_P3334428	Unknown
A_33_P3334718	0.49931	Compromised	-0.49931	Compromised	0	-0.369444	Compromised	-0.552186	Compromised	-0.460815	0.459794	3.69	1.82	1.64	1.69	A_33_P3334718	Unknown
A_33_P3335401	0.299883	Compromised	-0.299883	Compromised	0	0.501058	Compromised	0.871411	Detected	0.686234	0.190904	6.72	4.37	6.27	9.48	A_33_P3335401	Unknown
A_33_P3335540	-0.044796	Compromised	0.0447965	Compromised	2.385e-07	1.0242	Compromised	-0.0664482	Compromised	0.478876	0.47376	1.85	1.94	3.15	1.73	A_33_P3335540	Unknown
A_33_P3335576	-0.058357	Detected	0.0583568	Detected	-1.19e-07	-0.0196397	Compromised	1.01383	Detected	0.497097	0.439995	9.92	10.6	8.27	19.8	A_33_P3335576	Unknown
A_33_P3335606	-0.0340202	Detected	0.0340202	Detected	0	0.00960326	Detected	-0.0780184	Detected	-0.0342076	0.600278	997	1030	834	918	A_33_P3335606	Unknown
A_33_P3335645	-0.060833	Compromised	0.0608325	Compromised	-2.385e-07	0.191427	Compromised	-0.059732	Compromised	0.0658476	0.683474	1.8	1.93	1.74	1.71	A_33_P3335645	Unknown
A_33_P3335905	-0.0105309	Compromised	0.0105305	Compromised	-2.385e-07	0.094852	Compromised	-0.156602	Compromised	-0.030875	0.829496	1.97	1.97	1.72	1.69	A_33_P3335905	Unknown
A_33_P3336018	-0.0564022	Compromised	0.0564017	Compromised	-2.38e-07	0.177653	Compromised	0.815608	Compromised	0.49663	0.264954	1.98	2.11	1.89	3.44	A_33_P3336018	Unknown
A_33_P3336038	0.120102	Detected	-0.120101	Detected	2.4e-07	0.00328112	Detected	-0.0554929	Detected	-0.0261059	0.852339	16300	13600	12200	13700	A_33_P3336038	Unknown
A_33_P3336148	0.0337982	Detected	-0.0337982	Detected	0	-1.73351	Compromised	-1.71672	Compromised	-1.72512	0.000407265	15.1	14.2	3.6	4.26	A_33_P3336148	Unknown
A_33_P3336302	-0.0506158	Compromised	0.0506158	Compromised	0	0.174382	Compromised	-0.025846	Compromised	0.0742681	0.576028	1.75	1.85	1.66	1.69	A_33_P3336302	Unknown
A_33_P3336567	-0.321847	Compromised	0.321847	Compromised	2.4e-07	0.0834312	Compromised	0.688009	Compromised	0.38572	0.474473	4.41	6.79	4.74	8.43	A_33_P3336567	Unknown
A_33_P3337119	-0.0253282	Compromised	0.0253282	Compromised	0	0.451569	Compromised	0.122652	Compromised	0.287111	0.226588	1.93	1.97	2.18	2.03	A_33_P3337119	Unknown
A_33_P3337742	-0.00368619	Detected	0.00368619	Detected	0	0.381291	Detected	0.140867	Detected	0.261079	0.16212	95.3	94.4	101	100	A_33_P3337742	Unknown
A_33_P3338071	-0.416951	Compromised	0.416951	Compromised	2.4e-07	-0.94372	Compromised	-0.870228	Compromised	-0.906974	0.162575	3	5.27	1.69	2.08	A_33_P3338071	Unknown
A_33_P3338292	-0.625591	Compromised	0.625591	Compromised	-1.2e-07	-1.0943	Compromised	-0.230732	Compromised	-0.662517	0.475337	3.99	9.36	2.34	4.98	A_33_P3338292	Unknown
A_33_P3338379	-0.518084	Compromised	0.518084	Compromised	0	-0.311037	Compromised	-0.586574	Compromised	-0.448805	0.490589	1.9	3.84	1.78	1.72	A_33_P3338379	Unknown
A_33_P3338403	-0.0779295	Compromised	0.077929	Compromised	-2.4e-07	0.177917	Compromised	-0.0558462	Compromised	0.0610352	0.706322	1.94	2.13	1.88	1.87	A_33_P3338403	Unknown
A_33_P3338539	-0.0526371	Compromised	0.0526371	Compromised	0	0.208566	Compromised	0.053659	Compromised	0.131113	0.296455	1.83	1.94	1.78	1.87	A_33_P3338539	Unknown
A_33_P3338788	-0.0463076	Compromised	0.0463071	Compromised	-2.385e-07	0.639006	Compromised	0.0206199	Compromised	0.329813	0.402083	1.77	1.86	2.31	1.76	A_33_P3338788	Unknown
A_33_P3338808	-0.0568552	Compromised	0.0568552	Compromised	0	0.176499	Compromised	-0.0886693	Compromised	0.043915	0.789566	1.96	2.09	1.87	1.82	A_33_P3338808	Unknown
A_33_P3338833	-0.0346355	Compromised	0.0346351	Compromised	-2.385e-07	0.157463	Compromised	-0.146189	Compromised	0.00563669	0.974413	2.06	2.13	1.91	1.81	A_33_P3338833	Unknown
A_33_P3338873	-0.631102	Compromised	0.631102	Compromised	1.25e-07	-1.55117	Compromised	-0.899821	Compromised	-1.22549	0.226558	4.15	9.81	1.78	3.27	A_33_P3338873	Unknown
A_33_P3338937	-0.111188	Compromised	0.111188	Compromised	0	-1.99744	Compromised	-0.589361	Compromised	-1.2934	0.211247	7.88	9.06	1.73	5.37	A_33_P3338937	Unknown
A_33_P3339197	0.337466	Compromised	-0.337466	Compromised	0	0.565572	Compromised	-0.419488	Compromised	0.0730422	0.913816	3.24	2	3.08	1.82	A_33_P3339197	Unknown
A_33_P3339388	-0.0429158	Compromised	0.0429158	Compromised	0	0.591911	Compromised	1.23126	Compromised	0.911584	0.10571	1.96	2.05	2.47	4.5	A_33_P3339388	Unknown
A_33_P3339446	0.556531	Compromised	-0.556531	Compromised	0	-0.602334	Compromised	-0.277071	Compromised	-0.439703	0.527417	5.97	2.72	2.17	3.18	A_33_P3339446	Unknown
A_33_P3339611	-0.0292683	Compromised	0.0292678	Compromised	-2.385e-07	0.201891	Compromised	1.57401	Compromised	0.88795	0.325201	1.9	1.95	1.81	5.48	A_33_P3339611	Unknown
A_33_P3339696	0.230119	Compromised	-0.230119	Compromised	0	1.03549	Compromised	1.51635	Compromised	1.27592	0.0617966	3.49	2.5	4.95	8.08	A_33_P3339696	Unknown
A_33_P3339701	-0.720387	Compromised	0.720388	Compromised	2.4e-07	-1.46877	Compromised	0.116939	Compromised	-0.675917	0.592556	3.85	10.3	1.86	6.53	A_33_P3339701	Unknown
A_33_P3339741	-0.662793	Compromised	0.662794	Detected	2.4e-07	-1.54983	Compromised	-0.536708	Compromised	-1.04327	0.337551	4.17	10.3	1.83	4.32	A_33_P3339741	Unknown
A_33_P3340065	0.657523	Compromised	-0.657523	Compromised	0	-1.11735	Compromised	0.554519	Compromised	-0.281416	0.816089	8.18	3.24	1.94	7.23	A_33_P3340065	Unknown
A_33_P3340114	-0.0510669	Compromised	0.0510664	Compromised	-2.375e-07	0.164203	Compromised	-0.00971413	Compromised	0.0772445	0.523742	1.73	1.83	1.63	1.69	A_33_P3340114	Unknown
A_33_P3340189	0.33715	Compromised	-0.33715	Compromised	0	-0.195277	Compromised	-0.470533	Compromised	-0.332905	0.457126	3.19	1.97	1.79	1.73	A_33_P3340189	Unknown
A_33_P3340229	-0.145096	Compromised	0.145096	Compromised	0	-0.288057	Compromised	-1.72469	Compromised	-1.00637	0.303352	5.51	6.64	4.05	1.75	A_33_P3340229	Unknown
A_33_P3340264	0.23039	Detected	-0.23039	Compromised	-1.2e-07	-0.279063	Compromised	0.0740948	Compromised	-0.102484	0.757784	8.84	6.33	5.04	7.53	A_33_P3340264	Unknown
A_33_P3340424	0.0167377	Detected	-0.0167377	Detected	0	0.069689	Detected	0.214459	Detected	0.142074	0.19598	620	597	522	675	A_33_P3340424	Unknown
A_33_P3340454	-0.0537848	Compromised	0.0537853	Compromised	2.385e-07	0.172531	Compromised	0.378473	Compromised	0.275502	0.141122	1.78	1.89	1.69	2.28	A_33_P3340454	Unknown
A_33_P3340828	0.406345	Detected	-0.406345	Compromised	0	-0.670556	Compromised	0.318387	Detected	-0.176084	0.809037	13.1	7.35	5.04	11.7	A_33_P3340828	Unknown
A_33_P3340956	-0.0627961	Compromised	0.0627961	Compromised	0	0.196063	Compromised	-0.0300055	Compromised	0.0830288	0.586578	1.73	1.86	1.68	1.68	A_33_P3340956	Unknown
A_33_P3341289	0.506604	Compromised	-0.506605	Compromised	-2.5e-07	-0.395555	Compromised	-0.693573	Compromised	-0.544564	0.41081	4.26	2.08	1.85	1.76	A_33_P3341289	Unknown
A_33_P3341568	-0.0542622	Detected	0.0542622	Detected	0	-0.280604	Detected	-0.0965176	Detected	-0.188561	0.219649	128	136	88.8	118	A_33_P3341568	Unknown
A_33_P3341731	-0.0248151	Detected	0.0248151	Detected	0	0.15606	Detected	0.0502863	Detected	0.103173	0.219422	150	153	138	150	A_33_P3341731	Unknown
A_33_P3341882	0.145236	Compromised	-0.145236	Compromised	2.4e-07	0.185754	Compromised	0.238112	Compromised	0.211933	0.287487	2.42	1.95	2.02	2.45	A_33_P3341882	Unknown
A_33_P3342146	-0.0314407	Compromised	0.0314407	Compromised	0	0.189761	Compromised	-0.113065	Compromised	0.038348	0.827288	2.04	2.1	1.93	1.83	A_33_P3342146	Unknown
A_33_P3342195	-0.686101	Compromised	0.686101	Compromised	0	-0.305203	Compromised	1.40124	Compromised	0.548021	0.666348	1.76	4.49	1.86	7.1	A_33_P3342195	Unknown
A_33_P3342420	-0.0499587	Compromised	0.0499582	Compromised	-2.38e-07	0.176357	Compromised	-0.0327382	Compromised	0.0718095	0.598626	1.78	1.88	1.69	1.71	A_33_P3342420	Unknown
A_33_P3342953	-0.358975	Compromised	0.358975	Compromised	0	-0.293433	Compromised	0.294486	Compromised	0.000526425	0.999198	2.19	3.55	1.86	3.27	A_33_P3342953	Unknown
A_33_P3343200	-0.0359712	Compromised	0.0359712	Compromised	0	0.173568	Compromised	-0.0683546	Compromised	0.0526068	0.71726	1.95	2.02	1.83	1.81	A_33_P3343200	Unknown
A_33_P3343305	0.0365527	Detected	-0.0365527	Detected	0	0.337723	Detected	-0.157736	Detected	0.0899935	0.753706	36.4	34.1	36.4	30.2	A_33_P3343305	Unknown
A_33_P3343340	-0.0178914	Compromised	0.0178914	Compromised	0	0.19951	Compromised	-0.0663047	Compromised	0.0666027	0.668659	1.95	1.97	1.84	1.79	A_33_P3343340	Unknown
A_33_P3343394	-0.0634646	Compromised	0.0634651	Compromised	2.4e-07	0.185509	Compromised	0.738313	Compromised	0.461911	0.244911	1.97	2.12	1.9	3.26	A_33_P3343394	Unknown
A_33_P3343605	0.014235	Compromised	-0.014235	Compromised	0	-0.586984	Compromised	-0.318506	Compromised	-0.452745	0.078567	8	7.73	4.28	6.03	A_33_P3343605	Unknown
A_33_P3344044	-0.051527	Compromised	0.0515275	Compromised	2.385e-07	1.74468	Compromised	0.0151129	Compromised	0.879896	0.416664	1.71	1.81	4.82	1.7	A_33_P3344044	Unknown
A_33_P3344297	0.0327234	Compromised	-0.0327234	Compromised	0	-0.486882	Compromised	0.66106	Compromised	0.0870891	0.893493	5.67	5.34	3.21	8.32	A_33_P3344297	Unknown
A_33_P3344521	-0.0374641	Compromised	0.0374641	Compromised	0	0.199575	Compromised	-0.0347137	Compromised	0.0824308	0.571738	1.84	1.91	1.76	1.75	A_33_P3344521	Unknown
A_33_P3345031	0.0807962	Detected	-0.0807962	Detected	0	-0.00986385	Detected	-0.000444889	Detected	-0.00515437	0.955012	185	163	141	166	A_33_P3345031	Unknown
A_33_P3345108	-0.257102	Compromised	0.257102	Compromised	0	0.871724	Compromised	1.06938	Compromised	0.970554	0.0719569	3.73	5.25	6.62	8.88	A_33_P3345108	Unknown
A_33_P3345299	-0.0499587	Compromised	0.0499582	Compromised	-2.38e-07	0.176357	Compromised	-0.0411997	Compromised	0.0675788	0.629247	1.78	1.88	1.69	1.7	A_33_P3345299	Unknown
A_33_P3345304	-0.0497246	Compromised	0.0497246	Compromised	0	0.191636	Compromised	0.131245	Compromised	0.16144	0.109023	1.97	2.08	1.89	2.12	A_33_P3345304	Unknown
A_33_P3345319	-0.0277476	Compromised	0.0277472	Compromised	-2.385e-07	0.164898	Compromised	-0.122571	Compromised	0.0211635	0.898302	2.07	2.12	1.92	1.84	A_33_P3345319	Unknown
A_33_P3345409	-0.0348673	Compromised	0.0348678	Compromised	2.385e-07	0.148466	Compromised	-0.148376	Compromised	4.53e-05	0.999791	2.04	2.11	1.88	1.79	A_33_P3345409	Unknown
A_33_P3345614	0.0602052	Detected	-0.0602052	Detected	0	-0.102025	Detected	0.355433	Detected	0.126704	0.645765	182	165	132	212	A_33_P3345614	Unknown
A_33_P3345638	-0.194078	Compromised	0.194078	Compromised	0	-0.217388	Compromised	0.0828791	Compromised	-0.0672543	0.809727	5.66	7.3	4.52	6.51	A_33_P3345638	Unknown
A_33_P3345808	-0.051527	Compromised	0.0515275	Compromised	2.385e-07	0.17164	Compromised	0.0235744	Compromised	0.0976074	0.392313	1.71	1.81	1.62	1.71	A_33_P3345808	Unknown
A_33_P3345821	-0.0466056	Compromised	0.0466056	Compromised	0	0.178615	Compromised	-0.0869818	Compromised	0.0458167	0.775673	1.95	2.05	1.85	1.8	A_33_P3345821	Unknown
A_33_P3346046	-0.021297	Detected	0.021297	Detected	0	0.42753	Detected	0.0895162	Detected	0.258523	0.2684	79.8	81	88.4	81.8	A_33_P3346046	Unknown
A_33_P3346062	-0.055758	Compromised	0.055758	Compromised	0	0.175871	Compromised	0.00226974	Compromised	0.0890703	0.478935	1.7	1.81	1.62	1.68	A_33_P3346062	Unknown
A_33_P3346331	0.886769	Compromised	-0.88677	Compromised	-2.5e-07	-0.780866	Compromised	1.20606	Compromised	0.212597	0.887825	7.32	2.11	1.87	8.67	A_33_P3346331	Unknown
A_33_P3346333	-0.00356126	Detected	0.00356126	Detected	0	-0.209059	Compromised	-0.35837	Compromised	-0.283715	0.0629191	10.4	10.3	7.32	7.72	A_33_P3346333	Unknown
A_33_P3346508	-0.0179579	Detected	0.0179579	Detected	0	0.264426	Detected	-0.0175445	Detected	0.123441	0.476665	77.3	78.1	76.3	73.4	A_33_P3346508	Unknown
A_33_P3346526	0.05971	Compromised	-0.05971	Compromised	0	-1.47653	Compromised	-1.7806	Compromised	-1.62857	0.00991019	6.79	6.16	1.9	1.8	A_33_P3346526	Unknown
A_33_P3346533	0.0118387	Detected	-0.0118387	Detected	0	-0.328097	Detected	-0.218563	Detected	-0.27333	0.0395479	1310	1270	840	1060	A_33_P3346533	Unknown
A_33_P3346610	0.222768	Detected	-0.222768	Detected	0	-0.438965	Detected	0.0927999	Detected	-0.173082	0.66727	88.3	63.9	45.3	76.6	A_33_P3346610	Unknown
A_33_P3346643	-0.0325022	Compromised	0.0325027	Compromised	2.38e-07	0.200136	Compromised	-0.0734978	Compromised	0.0633192	0.696618	1.94	2	1.85	1.79	A_33_P3346643	Unknown
A_33_P3346691	-0.0501752	Compromised	0.0501752	Compromised	0	0.209654	Compromised	0.838091	Compromised	0.523873	0.241437	1.77	1.87	1.72	3.11	A_33_P3346691	Unknown
A_33_P3346716	-0.724284	Compromised	0.724284	Compromised	0	-0.794298	Compromised	-0.986218	Compromised	-0.890258	0.347258	2.16	5.81	1.67	1.71	A_33_P3346716	Unknown
A_33_P3346881	-0.253521	Compromised	0.253521	Compromised	0	-0.469142	Compromised	1.29085	Detected	0.410854	0.697618	3.72	5.21	2.6	10.3	A_33_P3346881	Unknown
A_33_P3347020	-0.0473423	Compromised	0.0473418	Compromised	-2.38e-07	0.168252	Compromised	-0.0984588	Compromised	0.0348964	0.828217	1.91	2.01	1.8	1.75	A_33_P3347020	Unknown
A_33_P3347049	-0.0185013	Detected	0.0185013	Detected	0	-0.2434	Detected	0.59817	Detected	0.177385	0.714589	18	18.2	12.5	26.2	A_33_P3347049	Unknown
A_33_P3347457	0.637839	Compromised	-0.637839	Compromised	0	-0.465714	Compromised	-0.760677	Compromised	-0.613195	0.447816	5.11	2.08	1.93	1.84	A_33_P3347457	Unknown
A_33_P3347503	-0.0706778	Detected	0.070678	Detected	1.18e-07	-1.27871	Compromised	-0.197211	Detected	-0.737963	0.308654	11.5	12.5	4.04	10	A_33_P3347503	Unknown
A_33_P3347522	0.110927	Detected	-0.110927	Detected	0	0.408599	Detected	0.0351877	Detected	0.221893	0.414373	41300	34900	41200	37200	A_33_P3347522	Unknown
A_33_P3347787	0.232799	Detected	-0.2328	Compromised	-1.2e-07	-1.4247	Compromised	-0.44768	Compromised	-0.936192	0.225768	11.7	8.35	3.01	6.93	A_33_P3347787	Unknown
A_33_P3348046	0.904143	Compromised	-0.904143	Compromised	2.35e-07	-0.753802	Compromised	-0.607902	Compromised	-0.680852	0.531188	6.61	1.86	1.7	2.2	A_33_P3348046	Unknown
A_33_P3348079	-0.0257173	Compromised	0.0257177	Compromised	2.385e-07	0.204679	Compromised	-0.0539937	Compromised	0.0753429	0.625412	1.88	1.92	1.79	1.75	A_33_P3348079	Unknown
A_33_P3348151	0.100177	Detected	-0.100177	Detected	0	-0.708278	Detected	0.255131	Detected	-0.226573	0.690376	24.6	21.1	11.4	26	A_33_P3348151	Unknown
A_33_P3348194	0.0104809	Compromised	-0.0104809	Compromised	0	0.564294	Compromised	-0.162345	Compromised	0.200974	0.635861	2.09	2.03	2.49	1.76	A_33_P3348194	Unknown
A_33_P3348328	-0.0209098	Compromised	0.0209103	Compromised	2.385e-07	0.171736	Compromised	0.371932	Compromised	0.271834	0.117159	2.07	2.1	1.92	2.58	A_33_P3348328	Unknown
A_33_P3348509	0.141004	Detected	-0.141004	Detected	0	-0.181263	Detected	0.396677	Detected	0.107707	0.769514	28.5	23.1	18.5	32.3	A_33_P3348509	Unknown
A_33_P3348670	0.0979485	Compromised	-0.0979485	Compromised	0	0.382693	Compromised	0.128826	Compromised	0.255759	0.251721	2.65	2.28	2.62	2.57	A_33_P3348670	Unknown
A_33_P3348744	0.02073	Detected	-0.0207295	Detected	2.385e-07	0.0729651	Detected	-0.126562	Detected	-0.0267982	0.817164	4480	4290	3770	3840	A_33_P3348744	Unknown
A_33_P3348927	-0.0516148	Detected	0.0516148	Detected	0	-1.801	Compromised	0.00754499	Detected	-0.896725	0.426501	27.3	28.9	6.59	27	A_33_P3348927	Unknown
A_33_P3349002	-0.102081	Compromised	0.102081	Compromised	0	-1.21154	Compromised	-0.924799	Compromised	-1.06817	0.0260906	4.36	4.95	1.64	2.34	A_33_P3349002	Unknown
A_33_P3349025	-0.226506	Compromised	0.226506	Compromised	0	-0.177523	Compromised	-0.117774	Compromised	-0.147648	0.58437	2.12	2.86	1.78	2.17	A_33_P3349025	Unknown
A_33_P3349158	-0.173563	Compromised	0.173563	Compromised	2.35e-07	-0.222199	Compromised	-0.396429	Compromised	-0.309314	0.252221	2.09	2.62	1.64	1.7	A_33_P3349158	Unknown
A_33_P3349474	0.0148468	Detected	-0.0148463	Detected	2.385e-07	-0.0397	Detected	0.327527	Detected	0.143913	0.516459	8100	7819.99	6330	9550	A_33_P3349474	Unknown
A_33_P3349501	0.142282	Detected	-0.142282	Detected	0	0.239521	Detected	-0.519582	Detected	-0.14003	0.7627	22	17.8	19.1	13.2	A_33_P3349501	Unknown
A_33_P3349597	0.0522349	Detected	-0.0522349	Detected	0	-0.431717	Detected	-0.0943282	Detected	-0.263023	0.274827	660	605	383	566	A_33_P3349597	Unknown
A_33_P3349676	0.203891	Compromised	-0.203891	Compromised	2.4e-07	0.525525	Compromised	-0.528362	Compromised	-0.0014186	0.998224	4.2	3.12	4.26	2.4	A_33_P3349676	Unknown
A_33_P3349727	-0.0521946	Compromised	0.0521951	Compromised	2.385e-07	0.168805	Compromised	0.641272	Compromised	0.405038	0.236072	1.85	1.96	1.75	2.84	A_33_P3349727	Unknown
A_33_P3350196	0.70406	Detected	-0.70406	Compromised	0	1.02272	Detected	-0.842327	Compromised	0.0901954	0.945498	16.4	6.09	16.6	5.33	A_33_P3350196	Unknown
A_33_P3350247	-0.0260444	Compromised	0.0260439	Compromised	-2.385e-07	0.160954	Compromised	-0.0150733	Compromised	0.0729406	0.51012	1.84	1.88	1.7	1.76	A_33_P3350247	Unknown
A_33_P3350453	0.513264	Compromised	-0.513264	Compromised	2.5e-07	-0.0284653	Compromised	-1.39051	Compromised	-0.709488	0.492943	6.78	3.28	3.78	1.72	A_33_P3350453	Unknown
A_33_P3350549	0.146152	Detected	-0.146152	Detected	0	-0.396558	Detected	0.16522	Detected	-0.115669	0.749899	105	84.5	58.5	101	A_33_P3350549	Unknown
A_33_P3350684	-0.249134	Compromised	0.249134	Compromised	-2.35e-07	-0.0150785	Compromised	-0.215612	Compromised	-0.115345	0.709401	1.76	2.45	1.68	1.71	A_33_P3350684	Unknown
A_33_P3350744	-0.186187	Compromised	0.186187	Detected	-1.2e-07	-0.522117	Compromised	0.13152	Detected	-0.195298	0.655347	9.72	12.4	6.25	11.5	A_33_P3350744	Unknown
A_33_P3351062	-0.173524	Detected	0.173524	Detected	0	-0.3356	Detected	-0.293973	Detected	-0.314787	0.213471	14.2	17.8	10.3	12.4	A_33_P3351062	Unknown
A_33_P3351166	0.146906	Detected	-0.146906	Detected	0	-1.2425	Compromised	-0.0130126	Detected	-0.627755	0.425275	15.3	12.3	4.74	13	A_33_P3351166	Unknown
A_33_P3351276	0.038727	Detected	-0.038727	Detected	0	0.0509193	Detected	-0.180978	Detected	-0.0650294	0.647932	30.3	28.3	24.8	24.7	A_33_P3351276	Unknown
A_33_P3351388	0.0647805	Detected	-0.0647805	Detected	0	-0.393999	Detected	-0.338721	Detected	-0.36636	0.0350272	46.4	41.8	27.4	33.3	A_33_P3351388	Unknown
A_33_P3351524	0.132495	Detected	-0.132495	Detected	0	-0.0794263	Detected	-0.253134	Detected	-0.16628	0.404033	139	114	97.4	101	A_33_P3351524	Unknown
A_33_P3351529	0.0791159	Detected	-0.0791159	Detected	0	0.330344	Detected	-0.0274954	Detected	0.151424	0.519886	67600.1	59700	65300	59600	A_33_P3351529	Unknown
A_33_P3351790	-0.536261	Compromised	0.536261	Compromised	0	0.269778	Compromised	-0.485543	Compromised	-0.107882	0.884474	1.79	3.71	2.54	1.76	A_33_P3351790	Unknown
A_33_P3351791	-0.30388	Compromised	0.303879	Compromised	-2.4e-07	0.00248909	Compromised	0.660295	Compromised	0.331392	0.536349	2.77	4.16	2.78	5.13	A_33_P3351791	Unknown
A_33_P3351920	0.158746	Detected	-0.158746	Detected	0	-0.835212	Compromised	-1.45581	Compromised	-1.14551	0.0814336	12	9.49	4.89	3.72	A_33_P3351920	Unknown
A_33_P3352011	0.171343	Detected	-0.171344	Detected	-1.15e-07	-1.98321	Compromised	-1.51267	Compromised	-1.74794	0.0266234	17.5	13.6	3.19	5.17	A_33_P3352011	Unknown
A_33_P3352268	-0.0353219	Detected	0.0353219	Detected	0	-0.652437	Detected	-0.225274	Detected	-0.438855	0.179851	42.9	44.4	22.7	35.7	A_33_P3352268	Unknown
A_33_P3352572	-0.0469704	Compromised	0.0469699	Compromised	-2.385e-07	0.177443	Compromised	-0.0805101	Compromised	0.0484662	0.757762	1.93	2.03	1.83	1.79	A_33_P3352572	Unknown
A_33_P3352837	0.252801	Compromised	-0.252801	Compromised	0	0.722242	Compromised	-0.302384	Compromised	0.209929	0.748514	2.91	2.02	3.27	1.88	A_33_P3352837	Unknown
A_33_P3353275	-0.223663	Compromised	0.223663	Compromised	0	-1.3756	Compromised	-1.57113	Compromised	-1.47337	0.0263669	5.12	6.88	1.87	1.91	A_33_P3353275	Unknown
A_33_P3353431	0.243663	Compromised	-0.243663	Compromised	0	-0.118132	Compromised	-0.252702	Compromised	-0.185417	0.53958	2.66	1.87	1.68	1.79	A_33_P3353431	Unknown
A_33_P3353630	-0.06513	Detected	0.0651302	Detected	1.195e-07	-0.723803	Compromised	-0.125643	Detected	-0.424723	0.299647	9.92	10.7	5.1	9.03	A_33_P3353630	Unknown
A_33_P3353752	-0.313983	Compromised	0.313983	Compromised	2.4e-07	-0.0634394	Compromised	-0.238882	Compromised	-0.151161	0.688451	1.74	2.65	1.68	1.74	A_33_P3353752	Unknown
A_33_P3353873	0.252977	Detected	-0.252977	Detected	-1.15e-07	-2.58304	Compromised	0.069766	Detected	-1.25664	0.450291	18.3	12.7	2.08	15.3	A_33_P3353873	Unknown
A_33_P3353906	0.0190885	Detected	-0.0190885	Detected	0	0.11572	Detected	-0.297091	Detected	-0.0906856	0.704466	522	501	453	398	A_33_P3353906	Unknown
A_33_P3354553	0.145764	Detected	-0.145764	Detected	0	-1.30678	Compromised	-1.13903	Detected	-1.22291	0.0183916	23.1	18.6	6.85	9	A_33_P3354553	Unknown
A_33_P3354579	-0.0453482	Compromised	0.0453477	Compromised	-2.385e-07	0.207459	Compromised	-0.0350981	Compromised	0.0861804	0.57416	1.82	1.91	1.76	1.74	A_33_P3354579	Unknown
A_33_P3354731	-0.0349855	Compromised	0.0349855	Compromised	0	0.185811	Compromised	-0.117425	Compromised	0.0341928	0.846459	2.03	2.1	1.92	1.82	A_33_P3354731	Unknown
A_33_P3354783	0.559115	Detected	-0.559115	Compromised	0	-0.307407	Compromised	-0.163594	Compromised	-0.235501	0.7167	11.3	5.13	5.03	6.5	A_33_P3354783	Unknown
A_33_P3354970	-0.305041	Compromised	0.305041	Compromised	0	-0.458738	Compromised	-0.384202	Compromised	-0.42147	0.303821	3.55	5.34	2.59	3.19	A_33_P3354970	Unknown
A_33_P3356106	-0.0707979	Compromised	0.0707974	Compromised	-2.4e-07	-0.112661	Compromised	0.284529	Detected	0.0859338	0.723066	7.23	7.86	5.7	8.78	A_33_P3356106	Unknown
A_33_P3356182	-0.205419	Detected	0.205419	Detected	0	-1.70677	Compromised	-1.11585	Compromised	-1.41131	0.05929	8.93	11.7	2.56	4.51	A_33_P3356182	Unknown
A_33_P3356366	-0.0900426	Compromised	0.0900421	Compromised	-2.38e-07	-0.51545	Compromised	-1.0586	Compromised	-0.787026	0.110653	3.69	4.12	2.23	1.79	A_33_P3356366	Unknown
A_33_P3356537	-0.0485048	Compromised	0.0485053	Compromised	2.38e-07	0.164227	Compromised	-0.070157	Compromised	0.0470347	0.746354	1.85	1.95	1.74	1.73	A_33_P3356537	Unknown
A_33_P3356637	0.301293	Detected	-0.301293	Compromised	-1.2e-07	-1.06753	Compromised	-0.218731	Compromised	-0.643131	0.34203	9.26	6.01	2.91	6.13	A_33_P3356637	Unknown
A_33_P3356696	-0.055866	Detected	0.055866	Detected	0	-1.12823	Compromised	0.585886	Detected	-0.271169	0.782112	18.5	19.7	7.14	27.4	A_33_P3356696	Unknown
A_33_P3357000	-0.0253282	Compromised	0.0253282	Compromised	0	0.199085	Compromised	-0.0669503	Compromised	0.0660672	0.673857	1.93	1.97	1.83	1.78	A_33_P3357000	Unknown
A_33_P3357232	1.07184	Compromised	-1.07184	Compromised	-2.5e-07	-0.887949	Compromised	-1.16464	Compromised	-1.0263	0.442531	8.34	1.86	1.74	1.68	A_33_P3357232	Unknown
A_33_P3357879	0.0496166	Detected	-0.0496163	Detected	1.19e-07	-0.0836167	Detected	-0.814267	Compromised	-0.448942	0.347505	12.5	11.5	9.25	6.52	A_33_P3357879	Unknown
A_33_P3358109	-0.39851	Compromised	0.398511	Compromised	2.35e-07	-0.269243	Compromised	-1.39222	Compromised	-0.830731	0.350966	3.65	6.25	3.24	1.74	A_33_P3358109	Unknown
A_33_P3358347	-0.0555656	Detected	0.0555656	Detected	0	0.105986	Detected	0.302499	Detected	0.204242	0.212109	683	727	620	831	A_33_P3358347	Unknown
A_33_P3358582	-0.915328	Compromised	0.915327	Compromised	-2.25e-07	-0.703092	Compromised	-0.92916	Compromised	-0.816126	0.469563	1.84	6.45	1.73	1.73	A_33_P3358582	Unknown
A_33_P3358653	-0.104882	Compromised	0.104882	Compromised	0	-0.259212	Compromised	-0.434356	Compromised	-0.346784	0.126456	2.29	2.61	1.67	1.73	A_33_P3358653	Unknown
A_33_P3358804	0.0261724	Detected	-0.0261724	Detected	0	0.0544808	Detected	0.192498	Detected	0.12349	0.236264	38.3	36.4	31.7	40.8	A_33_P3358804	Unknown
A_33_P3358851	0.734297	Detected	-0.734297	Compromised	0	-1.88913	Compromised	-0.889942	Compromised	-1.38953	0.25815	16.4	5.84	2.16	5.05	A_33_P3358851	Unknown
A_33_P3358855	-1.045	Compromised	1.045	Compromised	0	-0.822255	Compromised	-1.08093	Compromised	-0.951591	0.461528	1.89	7.93	1.79	1.75	A_33_P3358855	Unknown
A_33_P3358905	0.032908	Detected	-0.032908	Detected	0	-0.050065	Detected	0.0603914	Detected	0.00516319	0.943302	30.8	29	23.6	29.8	A_33_P3358905	Unknown
A_33_P3359285	0.0072813	Compromised	-0.0072813	Compromised	0	0.175866	Compromised	-0.089303	Compromised	0.0432813	0.775405	2.05	2	1.87	1.82	A_33_P3359285	Unknown
A_33_P3359408	-0.723184	Compromised	0.723184	Compromised	0	-0.551297	Compromised	0.0555248	Compromised	-0.247886	0.78188	2.1	5.64	1.92	3.42	A_33_P3359408	Unknown
A_33_P3359428	-0.0475311	Compromised	0.0475307	Compromised	-2.39e-07	0.167599	Compromised	-0.0910745	Compromised	0.0382621	0.807331	1.9	2	1.79	1.75	A_33_P3359428	Unknown
A_33_P3359832	-0.00655651	Compromised	0.00655603	Compromised	-2.385e-07	1.27063	Compromised	-0.0642104	Compromised	0.603212	0.461516	1.82	1.81	3.58	1.66	A_33_P3359832	Unknown
A_33_P3359846	-0.51053	Compromised	0.510531	Compromised	2.25e-07	-0.572765	Compromised	0.576205	Compromised	0.00171995	0.998418	2.47	4.94	1.92	4.98	A_33_P3359846	Unknown
A_33_P3359869	0.175864	Detected	-0.175864	Compromised	-1.2e-07	-0.428502	Compromised	-0.19593	Compromised	-0.312216	0.276805	9.31	7.19	4.97	6.83	A_33_P3359869	Unknown
A_33_P3360007	-0.0105305	Compromised	0.0105309	Compromised	2.385e-07	0.870687	Compromised	1.44986	Compromised	1.16027	0.0570863	1.96	1.96	2.93	5.12	A_33_P3360007	Unknown
A_33_P3360758	0.699338	Detected	-0.699338	Compromised	0	-1.77208	Compromised	-0.626591	Compromised	-1.19934	0.315795	16.4	6.13	2.4	6.21	A_33_P3360758	Unknown
A_33_P3361217	-0.403576	Compromised	0.403576	Compromised	-1.2e-07	-0.835794	Compromised	-1.93782	Compromised	-1.38681	0.17942	5.37	9.26	3.23	1.76	A_33_P3361217	Unknown
A_33_P3361309	0.0744314	Detected	-0.0744319	Detected	-2.38e-07	0.0801463	Detected	-0.00709581	Detected	0.0365252	0.713204	24300	21600	19800	21800	A_33_P3361309	Unknown
A_33_P3362239	0.0050385	Detected	-0.0050385	Detected	0	-0.352484	Detected	0.000995398	Detected	-0.175744	0.42498	281	275	178	266	A_33_P3362239	Unknown
A_33_P3362242	-0.0465054	Compromised	0.0465054	Compromised	0	0.178937	Compromised	0.0203753	Compromised	0.0996561	0.391568	1.76	1.85	1.67	1.75	A_33_P3362242	Unknown
A_33_P3362320	0.0684571	Compromised	-0.0684576	Compromised	-2.35e-07	-1.14374	Compromised	-0.989435	Compromised	-1.06659	0.00922263	5.11	4.58	1.79	2.33	A_33_P3362320	Unknown
A_33_P3362392	-0.274345	Compromised	0.274345	Compromised	0	-0.797019	Compromised	-1.05664	Compromised	-0.926829	0.0925836	3.08	4.44	1.74	1.7	A_33_P3362392	Unknown
A_33_P3362548	-0.0585768	Detected	0.0585768	Detected	0	-0.0532968	Detected	-0.134417	Detected	-0.0938568	0.318406	75.5	80.7	61.5	68	A_33_P3362548	Unknown
A_33_P3362567	0.100177	Detected	-0.100177	Detected	0	-0.0735619	Detected	0.0876329	Detected	0.00703549	0.961337	492	422	354	463	A_33_P3362567	Unknown
A_33_P3362601	0.100978	Compromised	-0.100979	Compromised	-2.38e-07	-0.825262	Compromised	-0.982618	Compromised	-0.90394	0.019471	3.84	3.29	1.64	1.72	A_33_P3362601	Unknown
A_33_P3362937	-0.0489092	Compromised	0.0489092	Compromised	0	0.600747	Compromised	-0.0465646	Compromised	0.277091	0.486401	1.83	1.93	2.33	1.74	A_33_P3362937	Unknown
A_33_P3363100	-0.174318	Detected	0.174318	Detected	0	-0.777389	Detected	0.0421393	Detected	-0.367625	0.495853	20.4	25.6	10.9	22.5	A_33_P3363100	Unknown
A_33_P3363105	-0.860097	Compromised	0.860097	Compromised	0	0.566957	Compromised	-0.80207	Compromised	-0.117556	0.924595	1.7	5.52	3.71	1.68	A_33_P3363105	Unknown
A_33_P3363161	-0.0493221	Compromised	0.0493226	Compromised	2.375e-07	0.500195	Compromised	-0.0394382	Compromised	0.230378	0.48936	1.81	1.91	2.15	1.73	A_33_P3363161	Unknown
A_33_P3363173	0.113719	Detected	-0.113719	Detected	0	0.144531	Detected	-0.320545	Detected	-0.0880072	0.766253	15.8	13.3	13.1	11.1	A_33_P3363173	Unknown
A_33_P3363254	0.0480235	Detected	-0.0480235	Detected	0	-0.355532	Detected	0.327945	Detected	-0.0137937	0.971748	29.5	27.2	18.1	34	A_33_P3363254	Unknown
A_33_P3363290	-0.0549979	Compromised	0.0549974	Compromised	-2.38e-07	0.177866	Compromised	-0.0136452	Compromised	0.0821104	0.534617	1.73	1.84	1.65	1.69	A_33_P3363290	Unknown
A_33_P3363507	-0.0330744	Compromised	0.0330749	Compromised	2.38e-07	0.205698	Compromised	-0.0772724	Compromised	0.064213	0.701731	1.89	1.95	1.81	1.74	A_33_P3363507	Unknown
A_33_P3363650	-0.0535502	Compromised	0.0535507	Compromised	2.385e-07	0.181656	Compromised	-0.0276365	Compromised	0.0770099	0.579675	1.79	1.9	1.71	1.73	A_33_P3363650	Unknown
A_33_P3363690	-0.412419	Compromised	0.412419	Compromised	2.4e-07	-0.188325	Compromised	1.03541	Compromised	0.423542	0.62392	1.73	3.02	1.64	4.48	A_33_P3363690	Unknown
A_33_P3363893	0.106579	Compromised	-0.10658	Compromised	-2.38e-07	0.830044	Compromised	0.254642	Compromised	0.542343	0.219144	3.47	2.95	4.65	3.65	A_33_P3363893	Unknown
A_33_P3363959	0.715392	Compromised	-0.715392	Compromised	2.3e-07	-0.581134	Compromised	-0.838229	Compromised	-0.709682	0.431849	5.69	2.08	1.88	1.84	A_33_P3363959	Unknown
A_33_P3364358	-0.0510669	Compromised	0.0510664	Compromised	-2.375e-07	0.190514	Compromised	-0.00120258	Compromised	0.0946558	0.475371	1.73	1.83	1.66	1.7	A_33_P3364358	Unknown
A_33_P3364493	0.0566199	Detected	-0.0566199	Detected	0	-0.618364	Detected	0.307571	Detected	-0.155396	0.77069	108	98.4	54.9	122	A_33_P3364493	Unknown
A_33_P3364498	0.0823238	Detected	-0.0823238	Detected	0	0.272588	Detected	0.335873	Detected	0.30423	0.0747404	919	808	851	1040	A_33_P3364498	Unknown
A_33_P3364836	0.119403	Detected	-0.119403	Detected	1.175e-07	-0.491778	Detected	-0.184007	Detected	-0.337892	0.224917	18.2	15.2	9.67	14	A_33_P3364836	Unknown
A_33_P3364929	-0.0214329	Compromised	0.0214329	Compromised	0	0.117117	Compromised	-0.150531	Compromised	-0.0167069	0.913163	1.97	2	1.76	1.71	A_33_P3364929	Unknown
A_33_P3365057	0.209968	Compromised	-0.209968	Compromised	0	-0.0473528	Compromised	-0.205115	Compromised	-0.126234	0.630243	2.43	1.79	1.65	1.73	A_33_P3365057	Unknown
A_33_P3365200	-0.564742	Compromised	0.564742	Compromised	2.5e-07	1.08761	Compromised	-0.685305	Compromised	0.201155	0.865895	2.05	4.42	5.23	1.79	A_33_P3365200	Unknown
A_33_P3365267	-0.385692	Detected	0.385693	Detected	1.2e-07	-0.876581	Compromised	0.079061	Detected	-0.39876	0.582708	12.9	21.7	7.45	16.9	A_33_P3365267	Unknown
A_33_P3365501	0.469106	Compromised	-0.469106	Compromised	-2.4e-07	0.192942	Compromised	-1.74445	Compromised	-0.775754	0.54592	9.43	4.85	6.32	1.93	A_33_P3365501	Unknown
A_33_P3365644	0.509087	Compromised	-0.509087	Compromised	0	-1.36938	Compromised	-0.367372	Compromised	-0.868375	0.348103	8.2	3.99	1.81	4.24	A_33_P3365644	Unknown
A_33_P3365666	0.121583	Detected	-0.121583	Detected	0	-0.112406	Detected	0.0916023	Detected	-0.010402	0.953704	48.4	40.3	33.4	45	A_33_P3365666	Unknown
A_33_P3365845	0.576718	Compromised	-0.576718	Compromised	-2.4e-07	0.143963	Compromised	0.201868	Compromised	0.172915	0.79285	4.74	2.1	2.85	3.47	A_33_P3365845	Unknown
A_33_P3365963	0.107098	Detected	-0.107098	Detected	0	0.644081	Detected	0.286224	Detected	0.465152	0.155437	1070	909	1260	1150	A_33_P3365963	Unknown
A_33_P3366179	-0.844459	Compromised	0.844458	Compromised	-2.5e-07	0.283874	Compromised	0.00436687	Compromised	0.144121	0.881775	1.86	5.91	3.3	3.18	A_33_P3366179	Unknown
A_33_P3366224	-0.00526524	Detected	0.00526571	Detected	2.3835e-07	-0.237527	Detected	-0.232552	Detected	-0.23504	0.000613326	2750	2730	1900	2230	A_33_P3366224	Unknown
A_33_P3366321	-0.044796	Compromised	0.0447965	Compromised	2.385e-07	0.184424	Compromised	-0.0172606	Compromised	0.0835817	0.527853	1.85	1.94	1.76	1.79	A_33_P3366321	Unknown
A_33_P3366412	0.238493	Detected	-0.238493	Compromised	0	0.50433	Detected	0.381766	Detected	0.443048	0.213792	12.4	8.78	12.1	13	A_33_P3366412	Unknown
A_33_P3366471	-0.0552483	Compromised	0.0552483	Compromised	0	0.303473	Compromised	-0.00553226	Compromised	0.14897	0.459766	1.72	1.83	1.79	1.69	A_33_P3366471	Unknown
A_33_P3366493	-0.238215	Compromised	0.238215	Compromised	0	0.95222	Compromised	0.640695	Compromised	0.796457	0.107502	2.91	3.99	5.39	5.08	A_33_P3366493	Unknown
A_33_P3366614	-0.0512953	Compromised	0.0512958	Compromised	2.385e-07	0.181162	Compromised	0.467906	Compromised	0.324534	0.166754	1.72	1.82	1.64	2.34	A_33_P3366614	Unknown
A_33_P3366739	0.596918	Compromised	-0.596919	Compromised	-2.5e-07	-0.466324	Compromised	-0.684124	Compromised	-0.575224	0.443187	4.48	1.93	1.74	1.75	A_33_P3366739	Unknown
A_33_P3367681	-0.051527	Compromised	0.0515275	Compromised	2.385e-07	0.162707	Compromised	0.0151129	Compromised	0.0889101	0.427366	1.71	1.81	1.61	1.7	A_33_P3367681	Unknown
A_33_P3367970	0.0990784	Detected	-0.0990784	Detected	0	-0.0864503	Detected	0.095824	Detected	0.00468683	0.975389	22.7	19.5	16.2	21.5	A_33_P3367970	Unknown
A_33_P3368034	0.0538845	Compromised	-0.053884	Compromised	2.38e-07	0.376641	Compromised	0.299716	Compromised	0.338179	0.0362524	1.99	1.82	2.02	2.24	A_33_P3368034	Unknown
A_33_P3368144	0.261497	Detected	-0.261497	Detected	-1.2e-07	-1.45274	Compromised	-1.01435	Detected	-1.23354	0.0687212	22.6	15.5	5.59	8.86	A_33_P3368144	Unknown
A_33_P3368303	-0.0501752	Compromised	0.0501752	Compromised	0	0.167093	Compromised	-0.0332885	Compromised	0.0669024	0.611055	1.77	1.87	1.67	1.7	A_33_P3368303	Unknown
A_33_P3368445	0.201075	Detected	-0.201075	Compromised	-1.2e-07	-2.31862	Compromised	-1.2073	Compromised	-1.76296	0.0963829	11.8	8.8	1.67	4.22	A_33_P3368445	Unknown
A_33_P3368822	-0.0425959	Compromised	0.0425959	Compromised	0	0.176112	Compromised	-0.121118	Compromised	0.0274973	0.875215	1.98	2.07	1.87	1.78	A_33_P3368822	Unknown
A_33_P3368900	-0.0166566	Detected	0.0166566	Detected	0	0.0799539	Detected	0.207368	Detected	0.143661	0.160875	46.9	47.3	40.7	52	A_33_P3368900	Unknown
A_33_P3369398	-0.0370398	Compromised	0.0370402	Compromised	2.385e-07	0.209089	Compromised	-0.0742044	Compromised	0.0674422	0.690294	1.87	1.94	1.8	1.73	A_33_P3369398	Unknown
A_33_P3369731	0.102056	Detected	-0.102057	Detected	-1.2e-07	-1.66333	Compromised	-0.543225	Detected	-1.10328	0.192203	17.3	14.8	4.13	10.5	A_33_P3369731	Unknown
A_33_P3369864	-0.0503941	Compromised	0.0503945	Compromised	2.375e-07	0.166383	Compromised	-0.0253334	Compromised	0.0705249	0.581738	1.76	1.86	1.66	1.7	A_33_P3369864	Unknown
A_33_P3370217	-0.0439148	Compromised	0.0439153	Compromised	2.375e-07	0.155005	Compromised	-0.104041	Compromised	0.0254819	0.869383	1.9	1.99	1.77	1.73	A_33_P3370217	Unknown
A_33_P3370325	0.126629	Compromised	-0.126629	Compromised	0	-0.0145588	Compromised	-0.232166	Compromised	-0.123362	0.536914	2.31	1.91	1.7	1.71	A_33_P3370325	Unknown
A_33_P3370515	0.0316038	Detected	-0.0316038	Detected	0	0.301747	Detected	0.147063	Detected	0.224405	0.115162	141000	133000	138000	145000	A_33_P3370515	Unknown
A_33_P3370612	-0.0512953	Compromised	0.0512958	Compromised	2.385e-07	0.172338	Compromised	-0.00157928	Compromised	0.0853794	0.486781	1.72	1.82	1.63	1.69	A_33_P3370612	Unknown
A_33_P3371144	-0.0458584	Detected	0.0458579	Detected	-2.385e-07	0.0650516	Detected	-0.161017	Detected	-0.0479827	0.732028	2590	2720	2270	2270	A_33_P3371144	Unknown
A_33_P3371243	-0.0481095	Compromised	0.0481095	Compromised	0	0.173772	Compromised	0.639969	Compromised	0.40687	0.229493	1.87	1.97	1.77	2.86	A_33_P3371243	Unknown
A_33_P3371260	-0.52642	Compromised	0.52642	Compromised	-1e-07	-0.165457	Compromised	0.311757	Compromised	0.0731497	0.910863	4.49	9.18	4.68	7.62	A_33_P3371260	Unknown
A_33_P3371450	0.181494	Compromised	-0.181494	Compromised	0	-0.0533891	Compromised	-0.311879	Compromised	-0.182634	0.498538	2.61	2	1.8	1.76	A_33_P3371450	Unknown
A_33_P3371769	0.000209093	Detected	-0.000209093	Detected	0	0.0706718	Detected	0.117334	Detected	0.094003	0.056441	2030	2000	1730	2090	A_33_P3371769	Unknown
A_33_P3372090	0.150433	Detected	-0.150433	Detected	0	-0.256793	Detected	-0.118198	Detected	-0.187495	0.375082	25	20	15.3	19.7	A_33_P3372090	Unknown
A_33_P3372104	0.63006	Compromised	-0.63006	Compromised	0	-0.907778	Compromised	0.489433	Compromised	-0.209172	0.844687	5.76	2.37	1.61	4.96	A_33_P3372104	Unknown
A_33_P3372207	0.217557	Detected	-0.217557	Detected	0	-0.561692	Compromised	-0.489924	Detected	-0.525808	0.139881	16.6	12.1	7.85	9.65	A_33_P3372207	Unknown
A_33_P3372659	-0.539851	Compromised	0.539852	Compromised	2.35e-07	1.09704	Compromised	1.13899	Compromised	1.11801	0.174378	2.29	4.77	5.78	6.96	A_33_P3372659	Unknown
A_33_P3373009	-0.0316448	Compromised	0.0316448	Compromised	0	0.0951295	Compromised	0.599565	Compromised	0.347347	0.305139	2.02	2.08	1.79	2.97	A_33_P3373009	Unknown
A_33_P3373014	-0.0565901	Compromised	0.0565896	Compromised	-2.385e-07	0.291374	Compromised	-0.04634	Compromised	0.122517	0.562552	1.82	1.94	1.88	1.74	A_33_P3373014	Unknown
A_33_P3373119	-0.122732	Compromised	0.122732	Compromised	1.19e-07	0.399825	Detected	0.187275	Detected	0.29355	0.212316	8.2	9.58	9.56	9.65	A_33_P3373119	Unknown
A_33_P3373194	0.482664	Compromised	-0.482664	Compromised	2.35e-07	-0.352303	Compromised	-0.631952	Compromised	-0.492127	0.430684	4.22	2.13	1.92	1.85	A_33_P3373194	Unknown
A_33_P3373200	0.154274	Detected	-0.154274	Detected	0	-1.16532	Detected	-0.683716	Detected	-0.924517	0.0838294	61.2	48.7	19.9	32.5	A_33_P3373200	Unknown
A_33_P3373418	-0.0597324	Compromised	0.0597324	Compromised	0	0.198369	Compromised	-0.00170469	Compromised	0.0983319	0.487547	1.7	1.82	1.65	1.68	A_33_P3373418	Unknown
A_33_P3373580	-0.679554	Compromised	0.679555	Compromised	2.4e-07	-0.346324	Compromised	-0.662334	Compromised	-0.504329	0.544867	1.78	4.5	1.82	1.71	A_33_P3373580	Unknown
A_33_P3373584	-0.0398283	Compromised	0.0398278	Compromised	-2.38e-07	0.144618	Compromised	-0.122556	Compromised	0.0110312	0.94413	1.93	2.01	1.78	1.73	A_33_P3373584	Unknown
A_33_P3373690	-0.169835	Compromised	0.169835	Compromised	0	0.822818	Compromised	-0.14536	Compromised	0.338729	0.576955	1.74	2.17	2.81	1.68	A_33_P3373690	Unknown
A_33_P3373715	-0.365236	Detected	0.365236	Detected	1.15e-07	0.011883	Detected	0.0778413	Detected	0.0448621	0.91382	14.8	24.2	15.6	19.1	A_33_P3373715	Unknown
A_33_P3373795	-0.548664	Compromised	0.548664	Compromised	0	-0.315001	Compromised	-0.515382	Compromised	-0.415191	0.534205	1.75	3.69	1.67	1.7	A_33_P3373795	Unknown
A_33_P3373970	0.231699	Compromised	-0.231699	Compromised	2.4e-07	-0.108871	Compromised	-0.373209	Compromised	-0.24104	0.461564	2.98	2.13	1.91	1.86	A_33_P3373970	Unknown
A_33_P3374215	-0.0806763	Detected	0.0806763	Detected	0	0.195726	Detected	0.247191	Detected	0.221458	0.120376	23.5	25.9	23.1	28	A_33_P3374215	Unknown
A_33_P3374253	0.0824444	Detected	-0.0824444	Detected	0	-0.31473	Detected	-0.619103	Detected	-0.466917	0.114326	43	37.8	26.5	25.1	A_33_P3374253	Unknown
A_33_P3374365	0.0899932	Detected	-0.0899932	Detected	0	1.59331	Detected	1.56243	Detected	1.57787	0.00333196	123	107	283	324	A_33_P3374365	Unknown
A_33_P3374903	0.0390167	Detected	-0.0390167	Detected	0	0.447322	Detected	-0.00832748	Detected	0.219497	0.442534	46.7	43.6	50.3	42.9	A_33_P3374903	Unknown
A_33_P3374982	-0.4601	Compromised	0.4601	Compromised	0	-0.916139	Compromised	-1.01472	Compromised	-0.965428	0.172242	3.11	5.8	1.84	2.01	A_33_P3374982	Unknown
A_33_P3375026	-0.0897455	Detected	0.0897453	Detected	-1.2e-07	-0.215686	Compromised	-0.0671115	Detected	-0.141399	0.348741	11.2	12.5	8.33	10.8	A_33_P3375026	Unknown
A_33_P3375269	0.104776	Compromised	-0.104776	Compromised	0	-0.272126	Compromised	0.0577488	Compromised	-0.107189	0.638367	6.16	5.25	3.85	5.66	A_33_P3375269	Unknown
A_33_P3375348	-0.398542	Detected	0.398542	Detected	0	0.134716	Detected	-0.463004	Compromised	-0.164144	0.773081	9.11	15.6	10.7	8.27	A_33_P3375348	Unknown
A_33_P3375496	-0.0668449	Detected	0.0668449	Detected	0	0.228146	Detected	0.171315	Detected	0.19973	0.110715	234	253	233	262	A_33_P3375496	Unknown
A_33_P3375513	0.207354	Compromised	-0.207354	Compromised	2.4e-07	-0.0708356	Compromised	-0.288541	Compromised	-0.179688	0.523118	2.57	1.9	1.72	1.73	A_33_P3375513	Unknown
A_33_P3375626	-0.0105309	Compromised	0.0105305	Compromised	-2.385e-07	0.189492	Compromised	-0.0446587	Compromised	0.0724168	0.600627	1.92	1.92	1.79	1.78	A_33_P3375626	Unknown
A_33_P3375657	-0.249762	Compromised	0.249763	Compromised	2.4e-07	0.255155	Compromised	1.46074	Compromised	0.857948	0.31908	1.78	2.48	2.05	5.53	A_33_P3375657	Unknown
A_33_P3375794	-0.0555019	Compromised	0.0555015	Compromised	-2.39e-07	0.167665	Compromised	0.0195994	Compromised	0.0936325	0.418079	1.71	1.82	1.62	1.71	A_33_P3375794	Unknown
A_33_P3375889	0.829192	Compromised	-0.829191	Compromised	2.5e-07	2.22761	Detected	-0.937771	Compromised	0.644919	0.7527	6.31	1.97	13.5	1.76	A_33_P3375889	Unknown
A_33_P3375899	0.159241	Detected	-0.159241	Compromised	0	-1.23061	Compromised	-0.452158	Compromised	-0.841382	0.183405	10.3	8.14	3.19	6.4	A_33_P3375899	Unknown
A_33_P3375910	-0.241483	Detected	0.241482	Detected	-1.15e-07	0.262504	Detected	-0.0614121	Detected	0.100546	0.762481	10.6	14.6	12.2	11.4	A_33_P3375910	Unknown
A_33_P3376021	-0.051527	Compromised	0.0515275	Compromised	2.385e-07	0.162707	Compromised	0.00660133	Compromised	0.0846543	0.460933	1.71	1.81	1.61	1.69	A_33_P3376021	Unknown
A_33_P3376075	-0.00496054	Detected	0.00496054	Detected	0	0.0682573	Detected	-0.289262	Detected	-0.110502	0.599613	39	38.7	33.3	30.4	A_33_P3376075	Unknown
A_33_P3376273	0.20884	Detected	-0.20884	Compromised	1.2e-07	0.24055	Detected	-0.312286	Compromised	-0.0358681	0.926986	13.5	9.96	11.2	8.93	A_33_P3376273	Unknown
A_33_P3376745	-0.559289	Compromised	0.559289	Compromised	0	-1.0086	Compromised	0.110828	Compromised	-0.448885	0.627691	2.86	6.12	1.7	4.32	A_33_P3376745	Unknown
A_33_P3376781	-0.00790763	Detected	0.00790763	Detected	0	0.231748	Detected	0.19969	Detected	0.215719	0.00679532	551	549	528	604	A_33_P3376781	Unknown
A_33_P3376836	0.0565155	Detected	-0.0565155	Detected	0	-0.482479	Detected	-0.291982	Detected	-0.387231	0.0729634	1690	1540	944	1260	A_33_P3376836	Unknown
A_33_P3377274	-0.0823832	Detected	0.0823832	Detected	0	0.141184	Detected	-0.0735393	Detected	0.0338225	0.825969	40.1	44.3	38	38.3	A_33_P3377274	Unknown
A_33_P3377714	-0.302243	Compromised	0.302243	Compromised	0	-0.942364	Compromised	0.190198	Compromised	-0.376083	0.617254	3.13	4.69	1.63	4.18	A_33_P3377714	Unknown
A_33_P3378269	-0.0512953	Compromised	0.0512958	Compromised	2.385e-07	0.172338	Compromised	0.0238061	Compromised	0.0980721	0.390746	1.72	1.82	1.63	1.72	A_33_P3378269	Unknown
A_33_P3378412	-0.0105307	Detected	0.0105307	Detected	0	-0.318738	Detected	-0.218363	Detected	-0.268551	0.0345826	14.6	14.6	9.57	12	A_33_P3378412	Unknown
A_33_P3378684	-0.0435753	Compromised	0.0435753	Compromised	0	0.188332	Compromised	-0.0535908	Compromised	0.0673707	0.652561	1.92	2.01	1.83	1.81	A_33_P3378684	Unknown
A_33_P3378737	0.0825987	Compromised	-0.0825987	Compromised	0	-0.529296	Compromised	-0.746952	Compromised	-0.638124	0.0429109	3.22	2.83	1.71	1.72	A_33_P3378737	Unknown
A_33_P3379056	0.0492013	Detected	-0.0492013	Detected	0	-0.428602	Detected	-0.293923	Detected	-0.361263	0.0493794	30.2	27.8	17.6	22.6	A_33_P3379056	Unknown
A_33_P3379136	-0.0560174	Compromised	0.0560174	Compromised	0	0.17519	Compromised	0.0105219	Compromised	0.0928559	0.449543	1.69	1.8	1.61	1.68	A_33_P3379136	Unknown
A_33_P3379231	-0.0523596	Compromised	0.0523601	Compromised	2.39e-07	0.175188	Compromised	-0.0969286	Compromised	0.0391295	0.813539	2.01	2.13	1.91	1.85	A_33_P3379231	Unknown
A_33_P3379776	-0.055758	Compromised	0.055758	Compromised	0	0.175871	Compromised	0.00226974	Compromised	0.0890703	0.478935	1.7	1.81	1.62	1.68	A_33_P3379776	Unknown
A_33_P3380006	1.24376	Detected	-1.24376	Compromised	2.5e-07	0.347074	Compromised	-0.230134	Compromised	0.0584695	0.967636	10.3	1.81	4.49	3.52	A_33_P3380006	Unknown
A_33_P3380076	-0.0422821	Compromised	0.0422821	Compromised	0	0.177274	Compromised	-0.0874748	Compromised	0.0448995	0.77727	2	2.09	1.89	1.84	A_33_P3380076	Unknown
A_33_P3380252	-0.0444384	Compromised	0.0444388	Compromised	2.39e-07	1.64057	Compromised	-0.0567994	Compromised	0.791888	0.449809	1.87	1.96	4.88	1.76	A_33_P3380252	Unknown
A_33_P3380913	0.0781674	Detected	-0.0781674	Detected	0	-0.681545	Detected	0.10477	Detected	-0.288387	0.546582	24.2	21.4	11.6	23.4	A_33_P3380913	Unknown
A_33_P3381132	0.104722	Detected	-0.104722	Compromised	1.175e-07	-1.46275	Compromised	-0.858432	Compromised	-1.16059	0.0682425	10.7	9.12	2.93	5.21	A_33_P3381132	Unknown
A_33_P3381292	0.0537796	Detected	-0.0537796	Detected	0	0.676878	Detected	0.264454	Detected	0.470666	0.157855	68	62.2	85	74.7	A_33_P3381292	Unknown
A_33_P3381305	-0.167109	Detected	0.167109	Detected	0	-0.442728	Detected	0.162805	Detected	-0.139961	0.724864	264	328	177	315	A_33_P3381305	Unknown
A_33_P3381443	-0.0173678	Compromised	0.0173683	Compromised	2.385e-07	0.184267	Compromised	-0.101923	Compromised	0.0411718	0.802029	2.1	2.12	1.96	1.88	A_33_P3381443	Unknown
A_33_P3381613	-0.309417	Compromised	0.309417	Detected	1.15e-07	-1.8924	Compromised	-2.03205	Compromised	-1.96223	0.0251498	5.98	9.05	1.62	1.72	A_33_P3381613	Unknown
A_33_P3381762	-0.0909421	Detected	0.0909421	Detected	0	0.694195	Detected	0.470558	Detected	0.582377	0.0561422	424	474	593	594	A_33_P3381762	Unknown
A_33_P3381796	-0.253712	Compromised	0.253711	Compromised	-1.2e-07	-1.56616	Compromised	-1.17643	Compromised	-1.3713	0.0503493	6.61	9.26	2.16	3.31	A_33_P3381796	Unknown
A_33_P3382105	-0.0224321	Detected	0.0224321	Detected	0	-0.10726	Detected	0.324123	Detected	0.108432	0.666655	541	550	414	653	A_33_P3382105	Unknown
A_33_P3382111	-0.258607	Detected	0.258607	Detected	0	-0.165545	Detected	-0.330732	Detected	-0.248139	0.457186	13.4	18.9	11.6	12.1	A_33_P3382111	Unknown
A_33_P3382118	-0.101468	Detected	0.101468	Detected	0	-0.267017	Detected	-0.206016	Detected	-0.236516	0.155256	521	591	377	460	A_33_P3382118	Unknown
A_33_P3382137	-0.751695	Compromised	0.751695	Compromised	0	-0.822858	Compromised	0.533362	Compromised	-0.144748	0.89941	2.33	6.51	1.8	5.39	A_33_P3382137	Unknown
A_33_P3382634	0.443265	Detected	-0.443265	Detected	0	-0.142248	Detected	0.00459576	Detected	-0.0688261	0.892313	25.7	13.7	13.9	18	A_33_P3382634	Unknown
A_33_P3382685	-0.0469089	Compromised	0.0469089	Compromised	0	0.177639	Compromised	0.0115137	Compromised	0.0945766	0.425959	1.74	1.83	1.65	1.72	A_33_P3382685	Unknown
A_33_P3382949	-0.188163	Compromised	0.188163	Compromised	0	-0.787458	Compromised	-0.978969	Compromised	-0.883214	0.0526683	3.08	3.94	1.65	1.69	A_33_P3382949	Unknown
A_33_P3383009	0.641065	Compromised	-0.641065	Compromised	2.3e-07	0.325092	Compromised	-1.00984	Compromised	-0.342374	0.746922	6.12	2.48	3.99	1.85	A_33_P3383009	Unknown
A_33_P3383075	0.914302	Compromised	-0.914302	Compromised	0	0.402895	Compromised	-1.00228	Compromised	-0.299693	0.819245	6.92	1.92	3.94	1.74	A_33_P3383075	Unknown
A_33_P3383084	-0.0491147	Compromised	0.0491147	Compromised	0	1.4096	Compromised	-0.0388646	Compromised	0.685366	0.444747	1.82	1.92	4.06	1.74	A_33_P3383084	Unknown
A_33_P3383371	0.123355	Detected	-0.123355	Detected	0	-0.448761	Detected	-0.509888	Detected	-0.479325	0.0636571	183	152	99.9	112	A_33_P3383371	Unknown
A_33_P3383486	-0.0179291	Compromised	0.0179296	Compromised	2.385e-07	0.167144	Compromised	-0.108112	Compromised	0.0295157	0.851298	1.94	1.96	1.79	1.73	A_33_P3383486	Unknown
A_33_P3383531	-0.923731	Compromised	0.923731	Compromised	0	-0.700098	Compromised	-0.386151	Compromised	-0.543124	0.620742	1.72	6.1	1.63	2.37	A_33_P3383531	Unknown
A_33_P3383762	0.0305698	Detected	-0.0305698	Detected	0	0.142262	Detected	0.123319	Detected	0.13279	0.0534686	32.5	30.7	28.5	32.9	A_33_P3383762	Unknown
A_33_P3383900	0.591458	Compromised	-0.591457	Compromised	2.35e-07	0.034647	Compromised	-0.295891	Compromised	-0.130622	0.851271	4.93	2.14	2.72	2.53	A_33_P3383900	Unknown
A_33_P3384255	0.659756	Compromised	-0.659756	Compromised	0	0.091466	Compromised	-1.06441	Compromised	-0.486475	0.634884	6.23	2.46	3.41	1.79	A_33_P3384255	Unknown
A_33_P3384337	0.143414	Compromised	-0.143414	Compromised	2.4e-07	-0.345697	Compromised	-0.826339	Compromised	-0.586018	0.171295	5.88	4.75	3.4	2.85	A_33_P3384337	Unknown
A_33_P3384427	-0.0570855	Compromised	0.0570855	Compromised	0	0.834381	Compromised	-0.064446	Compromised	0.384967	0.48495	1.8	1.92	2.71	1.7	A_33_P3384427	Unknown
A_33_P3384552	-0.165582	Compromised	0.165582	Compromised	2.4e-07	0.0831203	Compromised	-0.166031	Compromised	-0.0414555	0.859927	1.96	2.43	1.89	1.86	A_33_P3384552	Unknown
A_33_P3384913	0.275278	Compromised	-0.275278	Compromised	0	1.01674	Compromised	1.43626	Compromised	1.2265	0.0712219	2.69	1.81	3.65	5.71	A_33_P3384913	Unknown
A_33_P3384942	-0.045917	Compromised	0.0459175	Compromised	2.38e-07	0.21438	Compromised	-0.062314	Compromised	0.0760331	0.653958	1.79	1.88	1.74	1.68	A_33_P3384942	Unknown
A_33_P3385351	0.048254	Detected	-0.048254	Detected	0	0.0585227	Detected	0.407148	Detected	0.232836	0.326849	115	106	94	140	A_33_P3385351	Unknown
A_33_P3385431	-0.028255	Compromised	0.028255	Compromised	0	1.32922	Compromised	0.82206	Compromised	1.07564	0.0519241	2.01	2.06	4.18	3.44	A_33_P3385431	Unknown
A_33_P3385441	-0.0552483	Compromised	0.0552483	Compromised	0	0.177209	Compromised	-0.0140944	Compromised	0.0815573	0.537195	1.72	1.83	1.64	1.68	A_33_P3385441	Unknown
A_33_P3385671	0.451442	Compromised	-0.451442	Compromised	0	-0.310398	Compromised	-0.469352	Compromised	-0.389875	0.484608	3.51	1.85	1.68	1.76	A_33_P3385671	Unknown
A_33_P3385912	0.335237	Compromised	-0.335236	Compromised	2.4e-07	-0.215168	Compromised	-0.482109	Compromised	-0.348639	0.435875	3.23	2	1.79	1.74	A_33_P3385912	Unknown
A_33_P3386147	0.0646276	Compromised	-0.0646276	Compromised	0	-0.417462	Compromised	-0.212896	Compromised	-0.315179	0.121156	4.75	4.28	2.76	3.72	A_33_P3386147	Unknown
A_33_P3386487	-0.0465054	Compromised	0.0465054	Compromised	0	0.18755	Compromised	0.161621	Compromised	0.174586	0.0686854	1.76	1.85	1.68	1.93	A_33_P3386487	Unknown
A_33_P3387016	-0.57622	Compromised	0.57622	Compromised	0	-0.450334	Compromised	-0.868061	Compromised	-0.659197	0.394658	2.36	5.17	2.09	1.83	A_33_P3387016	Unknown
A_33_P3387075	-0.241321	Compromised	0.241321	Compromised	0	-0.774964	Compromised	-0.274227	Compromised	-0.524595	0.270438	3.05	4.2	1.71	2.83	A_33_P3387075	Unknown
A_33_P3387095	0.205713	Compromised	-0.205713	Compromised	0	0.00240994	Compromised	-1.52064	Compromised	-0.759115	0.43742	6.1	4.52	4.3	1.75	A_33_P3387095	Unknown
A_33_P3387429	-0.146841	Compromised	0.146841	Compromised	0	0.848541	Compromised	0.162148	Compromised	0.505345	0.308503	5	6.04	8.09	5.88	A_33_P3387429	Unknown
A_33_P3387656	-0.0503144	Compromised	0.0503144	Compromised	0	0.158737	Compromised	1.06873	Compromised	0.613734	0.312006	1.94	2.05	1.82	4	A_33_P3387656	Unknown
A_33_P3388527	0.116572	Detected	-0.116572	Detected	0	0.092313	Detected	0.20328	Detected	0.147796	0.370814	61.9	51.9	49.4	62.4	A_33_P3388527	Unknown
A_33_P3388883	-0.162786	Detected	0.162786	Detected	0	0.145579	Detected	-0.131628	Detected	0.00697541	0.976936	20	24.7	20.1	19.4	A_33_P3388883	Unknown
A_33_P3389028	-0.601394	Compromised	0.601395	Compromised	2.25e-07	-0.782287	Compromised	-0.873706	Compromised	-0.827996	0.303468	2.57	5.83	1.84	2.02	A_33_P3389028	Unknown
A_33_P3389578	0.063791	Detected	-0.063791	Detected	0	0.139764	Detected	0.374198	Detected	0.256981	0.194008	42.9	38.7	36.7	50.5	A_33_P3389578	Unknown
A_33_P3389668	-0.122093	Compromised	0.122093	Detected	1.2e-07	0.588971	Detected	0.755219	Detected	0.672095	0.0450581	8.43	9.84	11.2	14.7	A_33_P3389668	Unknown
A_33_P3389758	0.406107	Compromised	-0.406107	Compromised	0	0.277089	Compromised	0.400921	Compromised	0.339005	0.496004	7.02	3.94	5.21	6.64	A_33_P3389758	Unknown
A_33_P3390086	0.096143	Detected	-0.096143	Detected	0	-0.383075	Detected	-0.0376017	Detected	-0.210338	0.3988	371	320	216	321	A_33_P3390086	Unknown
A_33_P3390097	-0.112983	Compromised	0.112983	Compromised	0	-1.26402	Compromised	0.809471	Compromised	-0.227275	0.847698	4.98	5.74	1.82	8.96	A_33_P3390097	Unknown
A_33_P3390387	-0.0487061	Compromised	0.0487061	Compromised	0	0.16353	Compromised	0.373198	Compromised	0.268364	0.145979	1.84	1.94	1.73	2.34	A_33_P3390387	Unknown
A_33_P3390678	0.759536	Compromised	-0.759536	Compromised	0	-0.133995	Compromised	-0.170164	Compromised	-0.15208	0.859855	6.02	2.07	2.63	3	A_33_P3390678	Unknown
A_33_P3390753	0.0650721	Compromised	-0.0650725	Compromised	-2.4e-07	0.0815125	Compromised	-0.067935	Compromised	0.00678873	0.951609	2.01	1.81	1.65	1.74	A_33_P3390753	Unknown
A_33_P3390823	-0.0558319	Detected	0.0558319	Detected	0	-0.221507	Detected	0.308776	Detected	0.0436349	0.886858	75.6	80.5	54.7	92.4	A_33_P3390823	Unknown
A_33_P3390939	0.374376	Compromised	-0.374377	Compromised	-2.35e-07	-1.67051	Compromised	-1.25481	Compromised	-1.46266	0.0760576	8.44	4.95	1.66	2.59	A_33_P3390939	Unknown
A_33_P3391120	0.617212	Detected	-0.617212	Compromised	-1.2e-07	-0.830458	Compromised	-2.03679	Compromised	-1.43362	0.238553	12.2	5.11	3.63	1.84	A_33_P3391120	Unknown
A_33_P3391295	-0.0549979	Compromised	0.0549974	Compromised	-2.38e-07	0.212423	Compromised	-0.0308204	Compromised	0.0908015	0.566519	1.73	1.84	1.69	1.67	A_33_P3391295	Unknown
A_33_P3391390	-0.0386844	Compromised	0.0386844	Compromised	0	0.166023	Compromised	-0.130819	Compromised	0.017602	0.919118	2.01	2.09	1.88	1.79	A_33_P3391390	Unknown
A_33_P3391496	-0.0527787	Detected	0.0527787	Detected	0	-0.262914	Detected	-1.2882	Detected	-0.775558	0.271276	31.5	33.4	22.1	12.7	A_33_P3391496	Unknown
A_33_P3391511	-0.326415	Compromised	0.326415	Detected	-1.2e-07	0.166109	Detected	0.000499487	Detected	0.0833044	0.827696	8.39	13	9.58	9.99	A_33_P3391511	Unknown
A_33_P3391536	0.0125623	Detected	-0.0125623	Detected	0	-0.105263	Detected	-0.312953	Detected	-0.209108	0.183628	73	70.7	54.6	55.3	A_33_P3391536	Unknown
A_33_P3391970	0.248078	Compromised	-0.248078	Compromised	0	-0.260421	Compromised	-0.00802612	Compromised	-0.134223	0.677252	3.12	2.18	1.78	2.48	A_33_P3391970	Unknown
A_33_P3392213	0.00223708	Detected	-0.00223708	Detected	0	-0.00122523	Detected	-0.387482	Detected	-0.194354	0.420241	1140	1120	923	826	A_33_P3392213	Unknown
A_33_P3392350	0.0525782	Detected	-0.0525782	Detected	0	-0.0841296	Detected	-0.0446074	Detected	-0.0643685	0.370424	382	350	282	339	A_33_P3392350	Unknown
A_33_P3393370	-0.0443499	Detected	0.0443499	Detected	0	-0.10608	Detected	-0.0402157	Detected	-0.073148	0.316509	125	131	97.2	119	A_33_P3393370	Unknown
A_33_P3393398	0.0125704	Detected	-0.0125709	Detected	-2.385e-07	-0.468007	Detected	-0.558511	Detected	-0.513259	0.00826949	3490	3380	2030	2230	A_33_P3393398	Unknown
A_33_P3393689	-0.0519772	Compromised	0.0519772	Compromised	0	0.177639	Compromised	-0.0897698	Compromised	0.0439348	0.788342	1.86	1.97	1.77	1.72	A_33_P3393689	Unknown
A_33_P3393702	-0.22435	Compromised	0.22435	Compromised	0	-0.00118208	Compromised	-0.067255	Compromised	-0.0342185	0.893903	1.71	2.3	1.62	1.81	A_33_P3393702	Unknown
A_33_P3393708	0.456095	Compromised	-0.456095	Compromised	0	-0.364253	Compromised	-0.334592	Compromised	-0.349422	0.52387	3.59	1.88	1.65	1.97	A_33_P3393708	Unknown
A_33_P3393986	-0.491063	Compromised	0.491063	Compromised	2.4e-07	-0.259855	Compromised	-0.424523	Compromised	-0.342189	0.562922	1.69	3.29	1.61	1.68	A_33_P3393986	Unknown
A_33_P3394378	-0.0748227	Detected	0.0748227	Detected	0	-0.281256	Detected	-0.175006	Detected	-0.228131	0.130797	23.6	25.8	16.6	20.9	A_33_P3394378	Unknown
A_33_P3394965	0.29109	Compromised	-0.29109	Compromised	-2.35e-07	-0.142977	Compromised	-0.309807	Compromised	-0.226392	0.532627	2.78	1.83	1.67	1.74	A_33_P3394965	Unknown
A_33_P3395206	-0.0485048	Compromised	0.0485053	Compromised	2.38e-07	0.172494	Compromised	-0.0785203	Compromised	0.0469871	0.760276	1.85	1.95	1.75	1.72	A_33_P3395206	Unknown
A_33_P3395209	-0.058907	Compromised	0.0589075	Compromised	2.39e-07	1.43699	Compromised	-0.0261164	Compromised	0.705437	0.437881	1.73	1.85	3.96	1.68	A_33_P3395209	Unknown
A_33_P3395289	0.145661	Compromised	-0.145662	Compromised	-2.4e-07	-0.0246196	Compromised	-0.173152	Compromised	-0.0988855	0.606792	2.26	1.82	1.63	1.72	A_33_P3395289	Unknown
A_33_P3395310	0.0635843	Detected	-0.0635843	Detected	0	-0.220208	Detected	-0.544252	Detected	-0.38223	0.159249	29.7	26.8	19.8	18.5	A_33_P3395310	Unknown
A_33_P3395314	0.947025	Compromised	-0.947025	Compromised	0	-0.554614	Compromised	0.864445	Compromised	0.154916	0.907824	7.92	2.1	2.27	7.1	A_33_P3395314	Unknown
A_33_P3395472	-0.0263853	Compromised	0.0263853	Compromised	0	0.157971	Compromised	-0.000193596	Compromised	0.0788887	0.443891	1.8	1.84	1.66	1.74	A_33_P3395472	Unknown
A_33_P3395478	-0.0510669	Compromised	0.0510664	Compromised	-2.375e-07	0.173027	Compromised	0.0156713	Compromised	0.0943491	0.420393	1.73	1.83	1.64	1.72	A_33_P3395478	Unknown
A_33_P3395630	-0.0579243	Compromised	0.0579243	Compromised	0	-2.09138	Compromised	-2.15908	Compromised	-2.12523	0.000995087	9.13	9.75	1.81	2.02	A_33_P3395630	Unknown
A_33_P3395788	-0.0530891	Compromised	0.0530891	Compromised	0	0.1745	Compromised	-0.0599809	Compromised	0.0572596	0.699904	1.81	1.92	1.72	1.71	A_33_P3395788	Unknown
A_33_P3395843	-0.0570855	Compromised	0.0570855	Compromised	0	0.195175	Compromised	-0.064446	Compromised	0.0653644	0.690114	1.8	1.92	1.74	1.7	A_33_P3395843	Unknown
A_33_P3395883	0.0178728	Detected	-0.0178723	Detected	2.38e-07	0.050426	Detected	-0.0381389	Detected	0.00614357	0.909406	5180	4980	4300	4730	A_33_P3395883	Unknown
A_33_P3396339	0.681801	Compromised	-0.681801	Compromised	0	0.468398	Compromised	-0.718735	Compromised	-0.125168	0.902557	4.7	1.8	3.29	1.69	A_33_P3396339	Unknown
A_33_P3396379	-0.0471783	Compromised	0.0471787	Compromised	2.375e-07	-0.633064	Compromised	0.0650368	Compromised	-0.284014	0.504685	3.07	3.23	1.66	3.15	A_33_P3396379	Unknown
A_33_P3396434	0.0352192	Detected	-0.0352192	Detected	0	0.376135	Detected	0.157887	Detected	0.267011	0.145283	179000	168000	184000	185000	A_33_P3396434	Unknown
A_33_P3396469	0.112222	Detected	-0.112222	Detected	0	-0.754771	Detected	-0.00481844	Detected	-0.379795	0.434241	40.9	34.5	18.2	35.8	A_33_P3396469	Unknown
A_33_P3396477	-0.0442624	Compromised	0.0442619	Compromised	-2.39e-07	0.16175	Compromised	-0.0891218	Compromised	0.0363142	0.810454	1.88	1.97	1.76	1.73	A_33_P3396477	Unknown
A_33_P3396771	-0.540566	Compromised	0.540566	Compromised	2.35e-07	-0.121656	Compromised	-1.20571	Compromised	-0.663681	0.477348	2.94	6.13	3.19	1.76	A_33_P3396771	Unknown
A_33_P3397081	-0.0431395	Compromised	0.0431395	Compromised	0	0.189724	Compromised	0.040277	Compromised	0.115001	0.31414	1.73	1.81	1.65	1.74	A_33_P3397081	Unknown
A_33_P3397209	0.540203	Compromised	-0.540203	Compromised	0	-0.396873	Compromised	-0.638972	Compromised	-0.517923	0.448265	4.27	1.99	1.81	1.79	A_33_P3397209	Unknown
A_33_P3397433	-0.164037	Detected	0.164037	Detected	0	0.0653005	Detected	-0.0930629	Detected	-0.0138812	0.946191	35	43.3	33.3	34.9	A_33_P3397433	Unknown
A_33_P3397473	-0.695812	Compromised	0.695812	Compromised	2.25e-07	0.129518	Compromised	-0.772714	Compromised	-0.321598	0.735536	2.1	5.43	3.02	1.89	A_33_P3397473	Unknown
A_33_P3397506	0.0805709	Detected	-0.0805709	Detected	0	-0.670545	Detected	-0.713509	Detected	-0.692027	0.0142102	118	104	56.9	64.6	A_33_P3397506	Unknown
A_33_P3397573	-0.0497246	Compromised	0.0497246	Compromised	0	0.191636	Compromised	0.0828052	Compromised	0.13722	0.20372	1.97	2.08	1.89	2.05	A_33_P3397573	Unknown
A_33_P3397593	-0.0140753	Compromised	0.0140758	Compromised	2.385e-07	0.199188	Compromised	1.24431	Compromised	0.72175	0.301429	2.03	2.04	1.91	4.61	A_33_P3397593	Unknown
A_33_P3397608	0.21058	Compromised	-0.21058	Compromised	0	-0.0789948	Compromised	-0.245474	Compromised	-0.162235	0.548067	2.5	1.84	1.66	1.73	A_33_P3397608	Unknown
A_33_P3398187	0.488423	Compromised	-0.488423	Compromised	2.4e-07	0.380824	Compromised	0.929581	Detected	0.655202	0.3627	6.89	3.45	5.19	8.88	A_33_P3398187	Unknown
A_33_P3399181	-0.00342393	Detected	0.00342393	Detected	0	-0.214808	Detected	-0.420839	Detected	-0.317824	0.0910404	2040	2020	1430	1450	A_33_P3399181	Unknown
A_33_P3399713	-0.213784	Compromised	0.213784	Compromised	0	-0.172928	Compromised	0.837301	Compromised	0.332186	0.606331	2.12	2.81	1.77	4.17	A_33_P3399713	Unknown
A_33_P3399778	0.22669	Detected	-0.22669	Detected	0	-0.428693	Compromised	-0.737328	Compromised	-0.58301	0.167388	15.7	11.3	8.09	7.64	A_33_P3399778	Unknown
A_33_P3399911	-0.621342	Compromised	0.621342	Detected	-1.3e-07	-0.0243182	Compromised	0.76488	Detected	0.370281	0.664853	5.36	12.5	6.58	13.3	A_33_P3399911	Unknown
A_33_P3400023	-0.057085	Compromised	0.0570855	Compromised	2.385e-07	0.168136	Compromised	-0.0974612	Compromised	0.0353372	0.829663	1.95	2.08	1.85	1.8	A_33_P3400023	Unknown
A_33_P3400292	0.0865788	Detected	-0.0865788	Detected	0	-0.0834317	Detected	-0.711872	Detected	-0.397652	0.346783	26.2	22.9	18.9	14.3	A_33_P3400292	Unknown
A_33_P3401068	-0.0347505	Compromised	0.0347509	Compromised	2.4e-07	0.171902	Compromised	0.848711	Compromised	0.510306	0.272373	2.05	2.12	1.92	3.59	A_33_P3401068	Unknown
A_33_P3401084	-0.0336158	Detected	0.0336158	Detected	0	0.267554	Detected	0.143366	Detected	0.20546	0.100599	1230	1270	1230	1320	A_33_P3401084	Unknown
A_33_P3401138	-0.0962512	Detected	0.0962512	Detected	0	-0.0319583	Detected	-0.105488	Detected	-0.068723	0.573427	31.7	35.7	26.9	29.9	A_33_P3401138	Unknown
A_33_P3401146	-0.0581093	Compromised	0.0581093	Compromised	0	0.772314	Compromised	-0.0415602	Compromised	0.365377	0.467863	1.76	1.88	2.54	1.69	A_33_P3401146	Unknown
A_33_P3401179	-0.0501752	Compromised	0.0501752	Compromised	0	0.201241	Compromised	1.33868	Compromised	0.769961	0.309878	1.77	1.87	1.71	4.4	A_33_P3401179	Unknown
A_33_P3401394	0.317145	Detected	-0.317145	Detected	1.25e-07	0.185356	Detected	-0.181311	Detected	0.00202215	0.996097	18.9	12	14	12.7	A_33_P3401394	Unknown
A_33_P3401661	0.386827	Compromised	-0.386827	Compromised	0	-1.63218	Compromised	-0.595214	Compromised	-1.1137	0.227277	8.24	4.75	1.65	3.96	A_33_P3401661	Unknown
A_33_P3402071	-0.110879	Detected	0.110879	Detected	0	-0.0684438	Detected	0.0613632	Detected	-0.00354028	0.980519	20.1	23.1	16.8	21.5	A_33_P3402071	Unknown
A_33_P3402086	-0.236825	Compromised	0.236825	Detected	1.2e-07	-1.46441	Compromised	-0.716374	Compromised	-1.09039	0.13278	7.3	9.99	2.53	4.97	A_33_P3402086	Unknown
A_33_P3402294	-0.568387	Detected	0.568387	Detected	0	0.445139	Detected	0.535403	Detected	0.490271	0.480479	9.46	20.5	15.5	19.3	A_33_P3402294	Unknown
A_33_P3402495	0.382767	Detected	-0.382767	Detected	0	-0.787962	Detected	0.150244	Detected	-0.318859	0.651016	27.6	16	9.95	22.3	A_33_P3402495	Unknown
A_33_P3402600	0.0549393	Detected	-0.0549388	Detected	2.385e-07	-0.258852	Detected	-0.346746	Detected	-0.302799	0.0499716	8990	8210	5870	6460	A_33_P3402600	Unknown
A_33_P3402773	-0.0709806	Detected	0.0709806	Detected	0	0.636372	Detected	1.02167	Detected	0.829021	0.0562102	28.6	31.1	37.9	57.9	A_33_P3402773	Unknown
A_33_P3403169	-0.0386844	Compromised	0.0386844	Compromised	0	0.158329	Compromised	-0.138901	Compromised	0.00971365	0.955318	2.01	2.09	1.87	1.78	A_33_P3403169	Unknown
A_33_P3403242	-0.0510669	Compromised	0.0510664	Compromised	-2.375e-07	0.199179	Compromised	0.0323496	Compromised	0.115764	0.35818	1.73	1.83	1.67	1.74	A_33_P3403242	Unknown
A_33_P3403356	-0.0228622	Detected	0.0228622	Detected	0	-0.552873	Detected	-0.352883	Detected	-0.452878	0.0476629	1160	1180	652	876	A_33_P3403356	Unknown
A_33_P3403957	-0.0513372	Compromised	0.0513377	Compromised	2.39e-07	0.381077	Compromised	-0.0955353	Compromised	0.142771	0.617382	1.89	2	2.07	1.74	A_33_P3403957	Unknown
A_33_P3404047	-0.041714	Detected	0.041714	Detected	0	0.186167	Detected	-0.0665619	Detected	0.0598028	0.697148	74.7	78	71	69.7	A_33_P3404047	Unknown
A_33_P3404116	-0.555832	Compromised	0.555832	Compromised	0	-0.159884	Compromised	-1.37764	Compromised	-0.768761	0.449529	3.24	6.9	3.46	1.74	A_33_P3404116	Unknown
A_33_P3404221	-0.359384	Compromised	0.359384	Detected	0	0.998742	Detected	0.582243	Detected	0.790493	0.197347	8.94	14.5	18.6	16.3	A_33_P3404221	Unknown
A_33_P3404241	-0.0409079	Compromised	0.0409074	Compromised	-2.385e-07	0.204919	Compromised	-0.0455337	Compromised	0.0796926	0.606718	1.86	1.94	1.79	1.76	A_33_P3404241	Unknown
A_33_P3404346	-0.0139575	Compromised	0.0139575	Compromised	0	0.187677	Compromised	-0.0985126	Compromised	0.0445821	0.785825	2.1	2.11	1.96	1.88	A_33_P3404346	Unknown
A_33_P3404566	0.292227	Detected	-0.292227	Compromised	0	0.334154	Detected	-0.531871	Compromised	-0.0988587	0.867368	15.2	9.99	12.7	8.15	A_33_P3404566	Unknown
A_33_P3404759	-0.438607	Compromised	0.438607	Compromised	1.2e-07	-0.179257	Compromised	0.282939	Compromised	0.0518413	0.926261	4.9	8.87	4.76	7.67	A_33_P3404759	Unknown
A_33_P3405043	-0.174766	Detected	0.174766	Detected	0	-0.0569038	Detected	-0.503814	Detected	-0.280359	0.427185	17.6	22.1	15.5	13.3	A_33_P3405043	Unknown
A_33_P3405504	-0.995128	Compromised	0.995128	Detected	0	-2.67378	Compromised	-1.39452	Compromised	-2.03415	0.227657	7.1	27.8	1.8	5.11	A_33_P3405504	Unknown
A_33_P3405571	-0.0261283	Compromised	0.0261278	Compromised	-2.385e-07	0.898893	Compromised	-0.0237837	Compromised	0.437555	0.443625	1.83	1.87	2.82	1.74	A_33_P3405571	Unknown
A_33_P3405864	-0.0409079	Compromised	0.0409074	Compromised	-2.385e-07	0.204919	Compromised	-0.0455337	Compromised	0.0796926	0.606718	1.86	1.94	1.79	1.76	A_33_P3405864	Unknown
A_33_P3405870	-0.0437441	Compromised	0.0437446	Compromised	2.385e-07	0.139429	Compromised	-0.119807	Compromised	0.00981092	0.949355	1.91	2	1.76	1.72	A_33_P3405870	Unknown
A_33_P3406090	-0.0163715	Detected	0.0163715	Detected	0	-0.578765	Detected	-0.169539	Detected	-0.374152	0.209916	123	124	67.6	105	A_33_P3406090	Unknown
A_33_P3406110	-0.704396	Compromised	0.704396	Compromised	2.25e-07	-0.926412	Compromised	-1.12679	Compromised	-1.0266	0.285829	2.4	6.28	1.67	1.7	A_33_P3406110	Unknown
A_33_P3406255	-0.0584104	Detected	0.0584104	Detected	0	0.338519	Detected	0.051625	Detected	0.195072	0.334929	204	218	218	209	A_33_P3406255	Unknown
A_33_P3406265	0.287048	Compromised	-0.287048	Compromised	0	-0.135264	Compromised	-0.361332	Compromised	-0.248298	0.505377	2.84	1.88	1.72	1.72	A_33_P3406265	Unknown
A_33_P3406405	0.264853	Compromised	-0.264853	Compromised	-2.4e-07	-0.123809	Compromised	-0.299252	Compromised	-0.21153	0.527512	2.71	1.85	1.68	1.74	A_33_P3406405	Unknown
A_33_P3406413	-0.283029	Compromised	0.283029	Compromised	0	-0.0381269	Compromised	-0.272416	Compromised	-0.155272	0.662585	1.83	2.67	1.76	1.75	A_33_P3406413	Unknown
A_33_P3406547	-0.0465054	Compromised	0.0465054	Compromised	0	0.178937	Compromised	0.0769587	Compromised	0.127948	0.204909	1.76	1.85	1.67	1.82	A_33_P3406547	Unknown
A_33_P3406702	-0.033433	Detected	0.0334325	Detected	-2.38e-07	-0.0311074	Detected	-0.0949035	Detected	-0.0630054	0.30592	15500	16000	12600	14100	A_33_P3406702	Unknown
A_33_P3406811	-0.0467873	Compromised	0.0467868	Compromised	-2.385e-07	0.185851	Compromised	0.329268	Compromised	0.25756	0.0950235	1.94	2.04	1.85	2.39	A_33_P3406811	Unknown
A_33_P3407049	-0.0152714	Detected	0.0152714	Detected	0	-0.208434	Detected	0.763437	Detected	0.277502	0.625728	45.5	45.8	32.3	74.1	A_33_P3407049	Unknown
A_33_P3407230	-0.184954	Detected	0.184954	Detected	0	0.056783	Detected	-0.182832	Detected	-0.0630245	0.801782	22.3	28.4	21.4	21.2	A_33_P3407230	Unknown
A_33_P3407235	0.401616	Compromised	-0.401616	Compromised	0	-1.28855	Compromised	0.0732207	Compromised	-0.607664	0.522435	6.64	3.75	1.67	5.02	A_33_P3407235	Unknown
A_33_P3407374	0.0797548	Detected	-0.0797548	Detected	0	0.250394	Detected	-0.0370741	Detected	0.10666	0.582981	57800	51000	52800	50600	A_33_P3407374	Unknown
A_33_P3407564	-0.033802	Detected	0.033802	Detected	0	0.111418	Detected	-0.168338	Detected	-0.02846	0.861503	244	252	219	211	A_33_P3407564	Unknown
A_33_P3407623	0.113246	Compromised	-0.113246	Compromised	-2.38e-07	-0.0227404	Compromised	0.908453	Compromised	0.442856	0.452943	2.41	2.03	1.78	3.97	A_33_P3407623	Unknown
A_33_P3407626	-0.0410686	Detected	0.0410686	Detected	0	0.567924	Detected	-0.249421	Detected	0.159252	0.735593	18.5	19.3	22.9	15.2	A_33_P3407626	Unknown
A_33_P3407691	0.227259	Detected	-0.227259	Detected	0	-0.625772	Compromised	-0.159544	Detected	-0.392658	0.351096	14.6	10.5	6.56	10.6	A_33_P3407691	Unknown
A_33_P3407826	0.0608566	Detected	-0.0608566	Detected	0	0.19484	Detected	0.34387	Detected	0.269355	0.107412	329	298	293	380	A_33_P3407826	Unknown
A_33_P3407941	-0.784709	Compromised	0.784709	Compromised	2.5e-07	0.768848	Compromised	0.421022	Compromised	0.594935	0.536278	3.06	8.95	7.29	6.7	A_33_P3407941	Unknown
A_33_P3407999	0.419481	Compromised	-0.419481	Compromised	0	-0.919806	Compromised	0.378425	Compromised	-0.270691	0.759602	5.3	2.92	1.7	4.89	A_33_P3407999	Unknown
A_33_P3408047	-1.29611	Compromised	1.29611	Detected	-2.5e-07	0.41183	Compromised	-0.359336	Compromised	0.0262473	0.986276	1.75	10.4	4.64	3.18	A_33_P3408047	Unknown
A_33_P3408162	-0.0510669	Compromised	0.0510664	Compromised	-2.375e-07	0.164203	Compromised	-0.00120258	Compromised	0.0815003	0.489998	1.73	1.83	1.63	1.7	A_33_P3408162	Unknown
A_33_P3408222	0.356357	Compromised	-0.356356	Compromised	2.4e-07	0.489996	Compromised	-0.392771	Compromised	0.0486126	0.939517	3.01	1.81	2.68	1.7	A_33_P3408222	Unknown
A_33_P3408227	0.126667	Compromised	-0.126666	Compromised	2.4e-07	-0.480823	Compromised	1.15139	Compromised	0.335286	0.724077	3.06	2.53	1.63	5.91	A_33_P3408227	Unknown
A_33_P3408529	0.163505	Compromised	-0.163505	Compromised	0	-1.04921	Compromised	-0.168358	Compromised	-0.608782	0.324421	8.91	7	3.12	6.72	A_33_P3408529	Unknown
A_33_P3408643	-0.689125	Compromised	0.689126	Compromised	2.4e-07	-0.226316	Compromised	0.958491	Compromised	0.366087	0.726044	1.94	4.97	2.17	5.77	A_33_P3408643	Unknown
A_33_P3408665	0.0035677	Detected	-0.00356722	Detected	2.384e-07	0.244552	Detected	-0.0924192	Detected	0.0760665	0.695945	4650	4560	4460	4130	A_33_P3408665	Unknown
A_33_P3408678	0.819385	Compromised	-0.819385	Compromised	0	-0.524479	Compromised	-0.97294	Compromised	-0.748709	0.471099	6.13	1.94	1.96	1.68	A_33_P3408678	Unknown
A_33_P3408683	-0.0696621	Compromised	0.0696626	Compromised	2.38e-07	0.18734	Compromised	-0.0842905	Compromised	0.0515249	0.767832	1.99	2.16	1.93	1.87	A_33_P3408683	Unknown
A_33_P3408877	0.0353997	Detected	-0.0353997	Detected	0	0.375085	Detected	0.18208	Detected	0.278582	0.113442	92.4	86.7	94.9	97.1	A_33_P3408877	Unknown
A_33_P3409249	0.0425844	Detected	-0.0425844	Detected	0	-0.403639	Detected	-0.351799	Detected	-0.377719	0.0169771	32.4	30.1	19.3	23.4	A_33_P3409249	Unknown
A_33_P3409282	-0.155284	Detected	0.155284	Detected	0	-0.336715	Detected	-0.266108	Detected	-0.301412	0.198917	30.6	37.4	21.9	26.9	A_33_P3409282	Unknown
A_33_P3409289	0.0766671	Detected	-0.0766671	Detected	0	0.137478	Detected	0.0275357	Detected	0.0825069	0.474027	60.6	53.7	51.3	55.6	A_33_P3409289	Unknown
A_33_P3409544	-0.0575919	Compromised	0.0575914	Compromised	-2.375e-07	0.194109	Compromised	-0.0488329	Compromised	0.0726383	0.643089	1.78	1.9	1.72	1.7	A_33_P3409544	Unknown
A_33_P3409631	-0.00882721	Compromised	0.00882721	Compromised	0	-1.10466	Compromised	-0.873744	Compromised	-0.989202	0.0134275	4.24	4.23	1.61	2.21	A_33_P3409631	Unknown
A_33_P3409815	-0.0357506	Detected	0.0357506	Detected	0	-0.514506	Detected	-0.432631	Detected	-0.473568	0.0129171	53.4	55.3	31.1	38.5	A_33_P3409815	Unknown
A_33_P3410053	-0.0343137	Compromised	0.0343132	Compromised	-2.39e-07	0.217669	Compromised	-0.00839996	Compromised	0.104634	0.469186	1.79	1.85	1.73	1.73	A_33_P3410053	Unknown
A_33_P3410166	0.648945	Compromised	-0.648944	Compromised	2.25e-07	0.822414	Compromised	-0.751874	Compromised	0.0352702	0.975561	4.84	1.94	4.43	1.74	A_33_P3410166	Unknown
A_33_P3410269	-0.0318527	Compromised	0.0318527	Compromised	0	0.101194	Compromised	-0.174343	Compromised	-0.0365741	0.82009	2	2.06	1.78	1.72	A_33_P3410269	Unknown
A_33_P3410821	-0.0591011	Compromised	0.0591016	Compromised	2.375e-07	0.19093	Compromised	-0.0881567	Compromised	0.0513866	0.766838	2.01	2.15	1.94	1.87	A_33_P3410821	Unknown
A_33_P3411122	0.194407	Detected	-0.194407	Compromised	1.15e-07	-0.710874	Compromised	-0.439293	Compromised	-0.575083	0.136152	9.3	7	4.03	5.69	A_33_P3411122	Unknown
A_33_P3411384	0.016355	Detected	-0.016355	Detected	0	-0.485438	Detected	-0.251145	Detected	-0.368292	0.0895137	246	237	141	194	A_33_P3411384	Unknown
A_33_P3411890	-0.181425	Detected	0.181425	Detected	0	-0.30325	Detected	0.10583	Detected	-0.0987101	0.752642	30.3	38.4	22.6	35.1	A_33_P3411890	Unknown
A_33_P3412317	-0.621239	Compromised	0.621238	Compromised	-2.35e-07	1.07777	Compromised	1.0969	Compromised	1.08734	0.222211	2.11	4.92	5.56	6.59	A_33_P3412317	Unknown
A_33_P3412438	0.066437	Detected	-0.066437	Detected	0	0.0149357	Detected	-0.148161	Detected	-0.0666125	0.591305	83	74.6	65	67.9	A_33_P3412438	Unknown
A_33_P3412687	0.087245	Detected	-0.087245	Detected	0	-0.234638	Detected	-0.104758	Detected	-0.169698	0.259061	142	124	92.2	118	A_33_P3412687	Unknown
A_33_P3412695	0.0893397	Detected	-0.0893397	Detected	0	0.0974364	Detected	-0.135792	Detected	-0.0191779	0.908079	49.5	43.1	40.4	40.2	A_33_P3412695	Unknown
A_33_P3412795	-0.162227	Compromised	0.162227	Compromised	0	0.0600877	Compromised	0.693676	Compromised	0.376882	0.400635	1.88	2.32	1.78	3.23	A_33_P3412795	Unknown
A_33_P3413104	0.174888	Detected	-0.174888	Detected	-1.15e-07	-0.288419	Compromised	-0.404425	Detected	-0.346422	0.200843	15	11.6	8.83	9.53	A_33_P3413104	Unknown
A_33_P3413384	0.168263	Detected	-0.168263	Detected	-1.2e-07	-0.346684	Compromised	-0.390313	Compromised	-0.368499	0.162001	12.8	9.99	7.27	8.25	A_33_P3413384	Unknown
A_33_P3413514	0.154187	Detected	-0.154187	Detected	0	0.0942128	Detected	-0.259136	Detected	-0.0824618	0.758688	28.9	23	22.5	20.6	A_33_P3413514	Unknown
A_33_P3413518	0.474394	Compromised	-0.474395	Compromised	-2.4e-07	-0.805819	Compromised	-1.66041	Compromised	-1.23311	0.193169	8.05	4.11	2.69	1.74	A_33_P3413518	Unknown
A_33_P3413945	-0.00672388	Compromised	0.00672388	Compromised	0	0.208406	Compromised	-0.0585351	Compromised	0.0749354	0.631421	1.9	1.89	1.79	1.74	A_33_P3413945	Unknown
A_33_P3413997	-0.298971	Detected	0.298971	Detected	0	-0.753696	Detected	0.309123	Detected	-0.222287	0.750377	17.9	26.7	10.6	25.9	A_33_P3413997	Unknown
A_33_P3414017	0.344396	Detected	-0.344396	Detected	0	-0.394875	Detected	-0.357106	Detected	-0.37599	0.3895	615	376	299	359	A_33_P3414017	Unknown
A_33_P3414228	-0.0768819	Detected	0.0768819	Detected	0	-0.214916	Detected	0.393957	Detected	0.0895205	0.802378	30.1	33	22.2	39.6	A_33_P3414228	Unknown
A_33_P3414472	-0.535473	Compromised	0.535473	Detected	0	-0.143514	Compromised	-0.840055	Compromised	-0.491785	0.521863	7.39	15.3	7.87	5.68	A_33_P3414472	Unknown
A_33_P3414494	0.0310969	Compromised	-0.0310974	Compromised	-2.385e-07	0.0906453	Compromised	-0.184058	Compromised	-0.0467062	0.77168	2.14	2.02	1.81	1.75	A_33_P3414494	Unknown
A_33_P3415047	-0.0485048	Compromised	0.0485053	Compromised	2.38e-07	0.172494	Compromised	-0.0453534	Compromised	0.0635705	0.647243	1.85	1.95	1.75	1.76	A_33_P3415047	Unknown
A_33_P3415166	-0.17677	Compromised	0.176769	Compromised	-2.35e-07	-1.05133	Compromised	-1.33069	Compromised	-1.19101	0.0339705	4.36	5.49	1.93	1.86	A_33_P3415166	Unknown
A_33_P3415617	-0.0524151	Detected	0.0524151	Detected	0	0.0650427	Detected	-0.402844	Detected	-0.1689	0.554104	184	195	162	137	A_33_P3415617	Unknown
A_33_P3415826	0.329402	Compromised	-0.329402	Compromised	0	-0.265717	Compromised	-0.48347	Compromised	-0.374594	0.393159	3.22	2.01	1.73	1.74	A_33_P3415826	Unknown
A_33_P3415992	0.0144897	Compromised	-0.0144897	Compromised	0	-0.253001	Compromised	-0.528538	Compromised	-0.39077	0.106053	2.64	2.55	1.78	1.72	A_33_P3415992	Unknown
A_33_P3416196	-0.240951	Compromised	0.240951	Compromised	1.2e-07	0.315475	Compromised	0.0800939	Compromised	0.197785	0.537573	6.51	8.96	7.77	7.72	A_33_P3416196	Unknown
A_33_P3416644	-1.10902	Compromised	1.10902	Detected	1e-07	-1.27201	Compromised	0.316707	Compromised	-0.477652	0.759667	2.29	10.5	1.66	5.84	A_33_P3416644	Unknown
A_33_P3416649	-0.0182872	Compromised	0.0182872	Compromised	0	1.83631	Compromised	-0.0483027	Compromised	0.894003	0.442963	1.85	1.87	5.43	1.72	A_33_P3416649	Unknown
A_33_P3416707	-0.101914	Detected	0.101914	Detected	0	-0.199293	Detected	0.20267	Detected	0.00168848	0.994702	34.8	39.5	26.4	40.8	A_33_P3416707	Unknown
A_33_P3416807	-0.0286107	Compromised	0.0286102	Compromised	-2.38e-07	0.357866	Compromised	-0.0519991	Compromised	0.152934	0.536821	1.97	2.02	2.09	1.84	A_33_P3416807	Unknown
A_33_P3417123	0.00340891	Detected	-0.00340891	Detected	0	-0.193327	Detected	-0.136996	Detected	-0.165161	0.0282628	209	205	148	180	A_33_P3417123	Unknown
A_33_P3417464	0.100915	Compromised	-0.100915	Compromised	-2.375e-07	-0.933376	Compromised	-0.981986	Compromised	-0.957681	0.0115448	4.82	4.13	1.91	2.16	A_33_P3417464	Unknown
A_33_P3417547	-0.286099	Detected	0.286099	Detected	0	0.332362	Detected	0.142974	Detected	0.237668	0.512957	18.7	27.4	23.3	23.9	A_33_P3417547	Unknown
A_33_P3417553	-0.0473213	Compromised	0.0473208	Compromised	-2.385e-07	0.793368	Compromised	0.0444584	Compromised	0.418913	0.382614	1.72	1.81	2.5	1.74	A_33_P3417553	Unknown
A_33_P3418165	-0.0446167	Compromised	0.0446162	Compromised	-2.39e-07	0.176826	Compromised	-0.0492425	Compromised	0.0637918	0.652008	1.86	1.95	1.76	1.76	A_33_P3418165	Unknown
A_33_P3418321	0.168482	Detected	-0.168483	Compromised	-2.4e-07	-1.96422	Compromised	-2.22345	Compromised	-2.09384	0.0101503	9.51	7.42	1.76	1.72	A_33_P3418321	Unknown
A_33_P3418380	0.208654	Compromised	-0.208654	Compromised	2.35e-07	-0.154427	Compromised	-0.362271	Compromised	-0.258349	0.383162	3.74	2.76	2.36	2.39	A_33_P3418380	Unknown
A_33_P3418448	-0.000671387	Detected	0.000671387	Detected	0	-0.239477	Detected	-0.818655	Detected	-0.529066	0.209235	22.1	21.8	15.2	11.9	A_33_P3418448	Unknown
A_33_P3418466	0.0385594	Detected	-0.0385594	Detected	0	0.147084	Detected	0.0456419	Detected	0.0963628	0.269574	152	142	133	145	A_33_P3418466	Unknown
A_33_P3418496	-1.65977	Compromised	1.65977	Detected	0	0.0447602	Compromised	-0.761879	Compromised	-0.358559	0.853172	1.86	18.3	4.92	3.29	A_33_P3418496	Unknown
A_33_P3418571	-0.0461116	Compromised	0.0461111	Compromised	-2.385e-07	0.64969	Compromised	-0.0544262	Compromised	0.297632	0.49011	1.78	1.87	2.34	1.68	A_33_P3418571	Unknown
A_33_P3419204	0.636089	Compromised	-0.636089	Compromised	2.25e-07	1.33233	Compromised	-0.756653	Compromised	0.28784	0.835828	4.73	1.93	6.22	1.71	A_33_P3419204	Unknown
A_33_P3419735	-0.0700085	Detected	0.0700085	Detected	0	-0.185846	Detected	0.012944	Detected	-0.0864508	0.550775	73.3	79.6	54.9	73.7	A_33_P3419735	Unknown
A_33_P3419875	-0.982418	Compromised	0.982418	Compromised	1e-07	-1.10027	Compromised	-1.34236	Compromised	-1.22131	0.342581	2.42	9.31	1.81	1.79	A_33_P3419875	Unknown
A_33_P3420013	0.400873	Detected	-0.400873	Detected	-1.25e-07	-0.230694	Detected	-0.113093	Detected	-0.171894	0.712656	17.6	9.95	9.22	11.7	A_33_P3420013	Unknown
A_33_P3420347	-0.038548	Compromised	0.0385475	Compromised	-2.385e-07	0.151305	Compromised	-0.154052	Compromised	-0.00137353	0.993833	2.02	2.1	1.87	1.77	A_33_P3420347	Unknown
A_33_P3420695	0.041764	Detected	-0.041764	Detected	0	-0.035578	Detected	-0.471633	Detected	-0.253606	0.371609	143	133	110	95.1	A_33_P3420695	Unknown
A_33_P3420810	-0.0668378	Compromised	0.0668378	Compromised	0	-0.0686646	Compromised	-1.08385	Compromised	-0.57626	0.377268	7.76	8.39	6.29	3.64	A_33_P3420810	Unknown
A_33_P3421007	-0.00676394	Compromised	0.00676394	Compromised	0	0.127296	Compromised	0.845319	Compromised	0.486307	0.308349	1.92	1.91	1.71	3.29	A_33_P3421007	Unknown
A_33_P3421144	-0.0597324	Compromised	0.0597324	Compromised	0	0.198369	Compromised	-0.00170469	Compromised	0.0983319	0.487547	1.7	1.82	1.65	1.68	A_33_P3421144	Unknown
A_33_P3421438	0.00252104	Compromised	-0.00252104	Compromised	0	-1.60569	Compromised	-1.07549	Compromised	-1.34059	0.0369543	7.25	7.12	1.93	3.26	A_33_P3421438	Unknown
A_33_P3421515	0.0941486	Detected	-0.0941482	Detected	2.38e-07	-0.142094	Detected	-0.198726	Detected	-0.17041	0.225176	9550	8260	6580	7400	A_33_P3421515	Unknown
A_33_P3421674	1.12586	Detected	-1.12586	Compromised	-1e-07	0.122847	Compromised	0.820734	Compromised	0.471791	0.727667	10.1	2.09	4.09	7.76	A_33_P3421674	Unknown
A_33_P3421808	-0.0351043	Compromised	0.0351047	Compromised	2.375e-07	0.115649	Compromised	-0.175271	Compromised	-0.0298111	0.860503	2.02	2.09	1.82	1.74	A_33_P3421808	Unknown
A_33_P3422294	0.0710516	Detected	-0.0710521	Detected	-2.37e-07	-0.28762	Detected	-0.179951	Detected	-0.233786	0.119817	3460	3090	2190	2760	A_33_P3422294	Unknown
A_33_P3422712	-0.0436475	Detected	0.0436475	Detected	0	0.104442	Detected	-0.100251	Detected	0.00209546	0.986684	1490	1560	1340	1360	A_33_P3422712	Unknown
A_33_P3423017	-0.372768	Compromised	0.372768	Detected	0	0.194542	Compromised	0.625712	Detected	0.410127	0.441407	6.96	11.5	8.37	13.2	A_33_P3423017	Unknown
A_33_P3423202	-0.143436	Detected	0.143436	Detected	0	-0.694941	Detected	-0.514279	Detected	-0.60461	0.0704035	17.3	20.8	9.58	12.7	A_33_P3423202	Unknown
A_33_P3423210	-0.0530891	Compromised	0.0530891	Compromised	0	0.1745	Compromised	-0.0599809	Compromised	0.0572596	0.699904	1.81	1.92	1.72	1.71	A_33_P3423210	Unknown
A_33_P3423315	-0.122967	Compromised	0.122967	Compromised	0	0.929007	Compromised	-0.590015	Compromised	0.169496	0.846084	2.49	2.91	4.19	1.71	A_33_P3423315	Unknown
A_33_P3423565	-0.409336	Compromised	0.409336	Compromised	-2.5e-07	-0.209862	Compromised	-0.260612	Compromised	-0.235237	0.624155	1.91	3.32	1.78	2.01	A_33_P3423565	Unknown
A_33_P3423845	0.0910766	Detected	-0.0910766	Detected	0	0.316582	Detected	0.0339305	Detected	0.175256	0.406679	137	119	130	125	A_33_P3423845	Unknown
A_33_P3424108	0.29866	Detected	-0.29866	Compromised	0	0.284627	Compromised	1.15586	Detected	0.720242	0.305874	10.7	6.97	8.6	18.4	A_33_P3424108	Unknown
A_33_P3424347	0.0544457	Detected	-0.0544457	Detected	0	-0.65298	Detected	-0.26751	Detected	-0.460245	0.148348	101	92.3	50.2	76.7	A_33_P3424347	Unknown
A_33_P3424826	-0.148767	Compromised	0.148767	Compromised	-2.35e-07	-0.813292	Compromised	0.0358644	Compromised	-0.388714	0.478645	7.48	9.06	3.83	8.07	A_33_P3424826	Unknown
A_33_P3424856	-0.0320654	Compromised	0.0320649	Compromised	-2.375e-07	0.107354	Compromised	1.2623	Compromised	0.684828	0.358036	1.98	2.04	1.77	4.61	A_33_P3424856	Unknown
A_33_P3438201	-0.191385	Detected	0.191385	Detected	0	0.447143	Detected	0.221075	Detected	0.334109	0.271674	18.6	23.9	23.5	23.5	A_33_P3438201	Unknown
A_33_P3444555	0.136067	Detected	-0.136067	Detected	0	0.395174	Detected	0.475585	Detected	0.435379	0.0918097	17.4	14.2	16.9	20.9	A_33_P3444555	Unknown
A_33_P3465440	0.237885	Compromised	-0.237885	Compromised	2.4e-07	-0.109779	Compromised	-0.28338	Compromised	-0.19658	0.518803	2.54	1.8	1.62	1.68	A_33_P3465440	Unknown
A_33_P3479066	-0.312211	Detected	0.312211	Detected	1.2e-07	0.964737	Detected	0.461828	Detected	0.713283	0.217156	9.61	14.6	18.9	15.6	A_33_P3479066	Unknown
A_33_P3484775	-0.0505152	Compromised	0.0505147	Compromised	-2.385e-07	0.165992	Compromised	-0.100265	Compromised	0.0328636	0.83893	1.93	2.04	1.82	1.77	A_33_P3484775	Unknown
A_33_P3486059	-0.0311422	Compromised	0.0311422	Compromised	0	0.324734	Compromised	-0.133828	Compromised	0.095453	0.71997	2.07	2.13	2.15	1.83	A_33_P3486059	Unknown
A_33_P3503279	-0.178391	Detected	0.178391	Detected	0	-1.76223	Compromised	-0.675708	Detected	-1.21897	0.166691	22.9	28.9	6.2	15.4	A_33_P3503279	Unknown
A_33_P3509019	-0.1723	Compromised	0.1723	Compromised	0	0.0544448	Compromised	-0.138072	Compromised	-0.0418134	0.851847	1.79	2.24	1.7	1.74	A_33_P3509019	Unknown
A_33_P3510508	0.440546	Compromised	-0.440546	Compromised	0	-0.28382	Compromised	-0.518501	Compromised	-0.40116	0.471713	3.42	1.83	1.68	1.67	A_33_P3510508	Unknown
A_33_P3519223	-0.0656221	Detected	0.0656221	Detected	0	-0.726038	Compromised	0.32682	Detected	-0.199609	0.742886	12.6	13.6	6.47	15.7	A_33_P3519223	Unknown
A_33_P3521965	-0.0552483	Compromised	0.0552483	Compromised	0	0.177209	Compromised	-0.00553226	Compromised	0.0858383	0.505811	1.72	1.83	1.64	1.69	A_33_P3521965	Unknown
A_33_P3538688	-0.0575523	Compromised	0.0575523	Compromised	0	0.158955	Compromised	-0.083055	Compromised	0.03795	0.803632	1.93	2.06	1.82	1.8	A_33_P3538688	Unknown
A_33_P3615955	-0.895224	Compromised	0.895224	Detected	1.15e-07	0.672489	Compromised	-1.6357	Compromised	-0.481605	0.772935	3.08	10.5	7.41	1.75	A_33_P3615955	Unknown
A_33_P3642217	-0.503353	Compromised	0.503353	Detected	1.3e-07	0.291383	Compromised	-0.196503	Compromised	0.0474401	0.940136	5.05	10	7.11	5.93	A_33_P3642217	Unknown
A_33_P3673310	0.329265	Detected	-0.329265	Compromised	0	-0.53003	Compromised	-0.0491452	Detected	-0.289588	0.551184	15.2	9.49	6.8	11.1	A_33_P3673310	Unknown
A_33_P3673544	-0.03968	Compromised	0.03968	Compromised	0	0.15343	Compromised	-0.121548	Compromised	0.0159409	0.921474	1.94	2.02	1.8	1.74	A_33_P3673544	Unknown
A_33_P3701139	-0.0983946	Detected	0.0983946	Detected	0	-0.378454	Detected	-0.486467	Detected	-0.432461	0.0612395	1930	2180	1290	1400	A_33_P3701139	Unknown
A_33_P3723827	-0.603417	Compromised	0.603418	Compromised	2.5e-07	-0.353778	Compromised	-0.545289	Compromised	-0.449533	0.538459	1.71	3.89	1.65	1.69	A_33_P3723827	Unknown
A_33_P3733123	-0.182508	Compromised	0.182508	Compromised	0	-0.251857	Compromised	-0.51834	Compromised	-0.385098	0.230458	2.34	2.97	1.81	1.76	A_33_P3733123	Unknown
A_33_P3744376	-0.588206	Compromised	0.588206	Compromised	1.25e-07	-1.59667	Compromised	-0.454352	Compromised	-1.02551	0.337496	4.09	9.11	1.65	4.26	A_33_P3744376	Unknown
A_33_P3751193	-0.0317769	Compromised	0.0317769	Compromised	0	-0.887846	Compromised	-1.1052	Compromised	-0.996522	0.0126651	3.68	3.79	1.65	1.66	A_33_P3751193	Unknown
A_33_P3765291	1.5801	Detected	-1.5801	Compromised	2.5e-07	-1.45814	Compromised	-1.60713	Compromised	-1.53264	0.434814	16.6	1.83	1.64	1.73	A_33_P3765291	Unknown
A_33_P3806704	-0.0739093	Compromised	0.0739093	Compromised	0	0.197513	Compromised	-0.0666232	Compromised	0.0654449	0.707591	1.96	2.14	1.92	1.87	A_33_P3806704	Unknown
A_33_P3809328	-0.0429561	Detected	0.0429561	Detected	0	-0.462264	Detected	-0.144012	Detected	-0.303138	0.207263	43.5	45.5	26.4	38.5	A_33_P3809328	Unknown
A_33_P3815935	-0.314796	Compromised	0.314796	Compromised	2.4e-07	-0.101089	Compromised	-1.47117	Compromised	-0.786129	0.406547	4.25	6.48	4	1.81	A_33_P3815935	Unknown
A_33_P3855484	0.2507	Compromised	-0.2507	Compromised	-2.4e-07	-1.2721	Compromised	-0.271327	Compromised	-0.771714	0.3019	6.55	4.56	1.85	4.33	A_33_P3855484	Unknown
A1BG	-0.0662849	Detected	0.0662849	Detected	0	-0.0678494	Detected	-0.262486	Detected	-0.165168	0.295783	1120	1210	908	928	NM_130786	ref|Homo sapiens alpha-1-B glycoprotein (A1BG), mRNA [NM_130786]	alpha-1-B glycoprotein	ref|NM_130786|ens|ENST00000598345|ens|ENST00000595014|ens|ENST00000263100	GO:0008150|GO:0003674|GO:0072562|GO:0005576|GO:0005615|GO:0070062	GO:0003674=molecular_function	GO:0005615=extracellular space|GO:0070062=extracellular exosome|GO:0072562=blood microparticle|GO:0005576=extracellular region	GO:0008150=biological_process	THC2461029	ENST00000598345	Hs.529161	1
A1BG-AS1	0.00110435	Detected	-0.00110435	Detected	0	0.0711994	Detected	0.081965	Detected	0.0765822	0.00510887	250	246	213	251	AK027222	gb|Homo sapiens cDNA: FLJ23569 fis, clone LNG11861. [AK027222]	A1BG antisense RNA 1	gb|AK027222|gb|BC006144|gb|BC040926|tc|NP1154677					NP1154677		Hs.709582	503538
A1CF	-0.255323	Detected	0.255323	Detected	0	-1.09808	Compromised	-1.67618	Compromised	-1.38713	0.0693559	9.9	13.9	4.48	3.51	NM_138933	ref|Homo sapiens APOBEC1 complementation factor (A1CF), transcript variant 3, mRNA [NM_138933]	APOBEC1 complementation factor	ref|NM_138933|ref|NM_001198819|ref|NM_001198820|ref|NM_001198818	GO:0003725|GO:0005515|GO:0006397|GO:0030895|GO:0010467|GO:0003727|GO:0005783|GO:0016556|GO:0003723|GO:0016554|GO:0050821|GO:0005737|GO:0000166|GO:0005654	GO:0000166=nucleotide binding|GO:0005515=protein binding|GO:0003723=RNA binding|GO:0003725=double-stranded RNA binding|GO:0003727=single-stranded RNA binding	GO:0005783=endoplasmic reticulum|GO:0005654=nucleoplasm|GO:0005737=cytoplasm|GO:0030895=apolipoprotein B mRNA editing enzyme complex	GO:0006397=mRNA processing|GO:0010467=gene expression|GO:0050821=protein stabilization|GO:0016554=cytidine to uridine editing|GO:0016556=mRNA modification	NP220852	ENST00000373995	Hs.282795	29974
A25969	-0.0503144	Compromised	0.0503144	Compromised	0	0.182324	Compromised	-0.0832729	Compromised	0.0495255	0.760572	1.94	2.05	1.85	1.8	A25969	gb|H.sapiens mRNA for T-cell receptor IGR b 18 Vbeta 7. [A25969]		gb|A25969|gb|X58812|gb|X57616|gb|X57618
A2M	-0.0153837	Detected	0.0153837	Detected	0	0.542968	Detected	0.422317	Detected	0.482642	0.0162343	45.8215	46.1308	54.7632	58.9145	NM_000014	ref|Homo sapiens alpha-2-macroglobulin (A2M), mRNA [NM_000014]	alpha-2-macroglobulin	ref|NM_000014|ens|ENST00000318602|ens|ENST00000495709|ens|ENST00000495442	GO:0005515|GO:0007264|GO:0004867|GO:0072562|GO:0002020|GO:0019959|GO:0005829|GO:0019966|GO:0019838|GO:0022617|GO:0030198|GO:0031093|GO:0070062|GO:0001869|GO:0051056|GO:0043120|GO:0005102|GO:0030168|GO:0005576|GO:0010951|GO:0048863|GO:0007596|GO:0007597|GO:0002576|GO:0019899|GO:0048306	GO:0019959=interleukin-8 binding|GO:0019838=growth factor binding|GO:0002020=protease binding|GO:0019966=interleukin-1 binding|GO:0048306=calcium-dependent protein binding|GO:0005102=receptor binding|GO:0004867=serine-type endopeptidase inhibitor activity|GO:0005515=protein binding|GO:0043120=tumor necrosis factor binding|GO:0019899=enzyme binding	GO:0005576=extracellular region|GO:0070062=extracellular exosome|GO:0072562=blood microparticle|GO:0005829=cytosol|GO:0031093=platelet alpha granule lumen	GO:0007597=blood coagulation, intrinsic pathway|GO:0007596=blood coagulation|GO:0002576=platelet degranulation|GO:0048863=stem cell differentiation|GO:0001869=negative regulation of complement activation, lectin pathway|GO:0010951=negative regulation of endopeptidase activity|GO:0030168=platelet activation|GO:0007264=small GTPase mediated signal transduction|GO:0022617=extracellular matrix disass…	NP1159902	ENST00000318602	Hs.212838	2
A2M-AS1	0.0320783	Detected	-0.0320783	Detected	0	0.111389	Detected	-0.00798941	Detected	0.0516999	0.5252	95.2108	89.7497	81.6394	87.9056	NR_026971	ref|Homo sapiens A2M antisense RNA 1 (head to head) (A2M-AS1), long non-coding RNA [NR_026971]	A2M antisense RNA 1 (head to head)	ref|NR_026971|linc|lnc-KLRG1-1:1|gb|AK056852|gb|AK096375					THC2505447		Hs.592432	144571
A2ML1	-0.205988	Compromised	0.205988	Compromised	0	0.294253	Compromised	-0.214215	Compromised	0.040019	0.91384	1.96	2.57	2.25	1.85	NM_144670	ref|Homo sapiens alpha-2-macroglobulin-like 1 (A2ML1), transcript variant 1, mRNA [NM_144670]	alpha-2-macroglobulin-like 1	ref|NM_144670|ref|NM_001282424|ens|ENST00000541459|ens|ENST00000537475	GO:0010951|GO:0004867|GO:0030414|GO:0005615|GO:0052548|GO:0070062	GO:0030414=peptidase inhibitor activity|GO:0004867=serine-type endopeptidase inhibitor activity	GO:0005615=extracellular space|GO:0070062=extracellular exosome	GO:0010951=negative regulation of endopeptidase activity|GO:0052548=regulation of endopeptidase activity	NP1162821	ENST00000541459	Hs.620532	144568
A2MP1	0.0719991	Detected	-0.0719988	Detected	1.175e-07	0.601121	Detected	0.492236	Detected	0.546678	0.0261967	11.1	9.9	13	14.1	NR_040112	ref|Homo sapiens alpha-2-macroglobulin pseudogene 1 (A2MP1), non-coding RNA [NR_040112]	alpha-2-macroglobulin pseudogene 1	ref|NR_040112|ens|ENST00000543404|linc|lnc-PZP-1:1|tc|THC2644733						ENST00000566278	Hs.569125	3
A3GALT2	-0.0431395	Compromised	0.0431395	Compromised	0	0.180954	Compromised	0.040277	Compromised	0.110616	0.312042	1.73	1.81	1.64	1.74	NM_001080438	ref|Homo sapiens alpha 1,3-galactosyltransferase 2 (A3GALT2), mRNA [NM_001080438]	alpha 1,3-galactosyltransferase 2	ref|NM_001080438|ens|ENST00000442999|tc|NP1250934					NP1250934	ENST00000442999		127550
A4GALT	0.101822	Detected	-0.101822	Detected	-2.38e-07	-0.320168	Detected	-0.367013	Detected	-0.34359	0.0813456	3120	2670	1890	2140	NM_017436	ref|Homo sapiens alpha 1,4-galactosyltransferase (A4GALT), mRNA [NM_017436]	alpha 1,4-galactosyltransferase	ref|NM_017436|ens|ENST00000381278|ens|ENST00000401850|ens|ENST00000249005	GO:0007009|GO:0030173|GO:0050512|GO:0016020|GO:0001576|GO:0015643|GO:0006688|GO:0006486|GO:0008378|GO:0070062	GO:0015643=toxic substance binding|GO:0008378=galactosyltransferase activity|GO:0050512=lactosylceramide 4-alpha-galactosyltransferase activity	GO:0070062=extracellular exosome|GO:0030173=integral component of Golgi membrane|GO:0016020=membrane	GO:0001576=globoside biosynthetic process|GO:0007009=plasma membrane organization|GO:0006486=protein glycosylation|GO:0006688=glycosphingolipid biosynthetic process	THC2462020	ENST00000381278	Hs.105956	53947
A4GNT	-0.0418987	Compromised	0.0418987	Compromised	0	0.210361	Compromised	-0.015707	Compromised	0.0973272	0.504213	1.8	1.88	1.74	1.74	NM_016161	ref|Homo sapiens alpha-1,4-N-acetylglucosaminyltransferase (A4GNT), mRNA [NM_016161]	alpha-1,4-N-acetylglucosaminyltransferase	ref|NM_016161|ens|ENST00000236709|gb|BC119640|gb|BC119639	GO:0008375|GO:0009101|GO:0016020|GO:0006493|GO:0000139|GO:0005975|GO:0050680|GO:0016021	GO:0008375=acetylglucosaminyltransferase activity	GO:0016020=membrane|GO:0016021=integral component of membrane|GO:0000139=Golgi membrane	GO:0005975=carbohydrate metabolic process|GO:0009101=glycoprotein biosynthetic process|GO:0006493=protein O-linked glycosylation|GO:0050680=negative regulation of epithelial cell proliferation	THC2485728	ENST00000236709	Hs.278960	51146
AA06	-0.922889	Compromised	0.922889	Compromised	0	-0.70562	Compromised	-0.897541	Compromised	-0.80158	0.478701	1.77	6.27	1.67	1.71	NR_037584	ref|Homo sapiens uncharacterized LOC100506677 (AA06), non-coding RNA [NR_037584]	uncharacterized LOC100506677	ref|NR_037584|linc|lnc-MYO1D-3:1|gb|AF381172|gb|AF381173					THC2616013		Hs.652571	100506677
AA489744	-1.58936	Compromised	1.58936	Detected	0	-0.224901	Compromised	-0.68216	Compromised	-0.453531	0.804147	2.23	19.9	4.66	3.97	AA489744	gb|aa43c10.r1 Soares_NhHMPu_S1 Homo sapiens cDNA clone IMAGE:823698 5', mRNA sequence [AA489744]		gb|AA489744
AA496144	-0.593609	Compromised	0.593609	Compromised	0	0.0281329	Compromised	0.297529	Compromised	0.162831	0.814141	2.13	4.78	2.66	3.75	AA496144	gb|zv51g10.r1 Soares_testis_NHT Homo sapiens cDNA clone IMAGE:757218 5', mRNA sequence [AA496144]		gb|AA496144|tc|THC2667977
AA504818	0.000829458	Detected	-0.000829458	Detected	0	-0.0115001	Detected	-0.345131	Detected	-0.178315	0.39702	1280	1260	1030	956	AA504818	gb|aa64c04.s1 NCI_CGAP_GCB1 Homo sapiens cDNA clone IMAGE:825702 3' similar to contains Alu repetitive element;contains element TAR1 repetitive element ;, mRNA sequence [AA504818]		gb|AA504818|tc|THC2630254|tc|THC2473967
AA593742	-0.487594	Compromised	0.487594	Detected	1.2e-07	-1.2323	Compromised	-1.69414	Compromised	-1.46322	0.113307	6.71	13	3.25	2.76	AA593742	gb|nl83g08.s1 NCI_CGAP_Br2 Homo sapiens cDNA clone IMAGE:1057310 3' similar to contains L1.t2 L1 repetitive element ;, mRNA sequence [AA593742]		gb|AA593742|tc|THC2723561
AA682772	-0.0421276	Compromised	0.0421276	Compromised	0	1.56799	Compromised	0.189277	Compromised	0.878635	0.331208	2.01	2.1	4.98	2.24	AA682772	gb|ah52h03.s1 Soares_testis_NHT Homo sapiens cDNA clone 1293173 3', mRNA sequence [AA682772]		gb|AA682772
AA778499	-0.0756588	Detected	0.0756588	Detected	0	0.17934	Detected	-0.023458	Detected	0.0779412	0.600627	127	139	123	125	AA778499	gb|af85e03.s1 Soares_testis_NHT Homo sapiens cDNA clone 1048828 3', mRNA sequence [AA778499]		gb|AA778499
AAAS	-0.0533955	Detected	0.0533955	Detected	0	-0.057081	Detected	0.107435	Detected	0.0251772	0.821384	1470	1560	1190	1560	NM_015665	ref|Homo sapiens achalasia, adrenocortical insufficiency, alacrimia (AAAS), transcript variant 1, mRNA [NM_015665]	achalasia, adrenocortical insufficiency, alacrimia	ref|NM_015665|ref|NM_001173466|ens|ENST00000552876|ens|ENST00000209873	GO:0007077|GO:0010467|GO:0019221|GO:0019058|GO:0005634|GO:0044281|GO:0005635|GO:0015031|GO:0008645|GO:0003674|GO:0005737|GO:0015758|GO:0005643|GO:0016032|GO:0007612|GO:0046822|GO:0005813|GO:0031965|GO:0005975|GO:0019083|GO:0055085|GO:0010827|GO:0006913|GO:0009566|GO:0016020|GO:0009405|GO:0005654|GO:0051028|GO:0000278	GO:0003674=molecular_function	GO:0005654=nucleoplasm|GO:0005643=nuclear pore|GO:0005635=nuclear envelope|GO:0005634=nucleus|GO:0005813=centrosome|GO:0031965=nuclear membrane|GO:0005737=cytoplasm|GO:0016020=membrane	GO:0007077=mitotic nuclear envelope disassembly|GO:0015031=protein transport|GO:0007612=learning|GO:0008645=hexose transport|GO:0000278=mitotic cell cycle|GO:0044281=small molecule metabolic process|GO:0019083=viral transcription|GO:0006913=nucleocytoplasmic transport|GO:0019221=cytokine-mediated signaling pathway|GO:0016032=viral process|GO:0051028=mRNA transport|GO:0055085=transmembrane transpo…	THC2533646	ENST00000552876	Hs.369144	8086
AACS	-0.034157	Detected	0.034157	Detected	0	-0.222884	Detected	0.140242	Detected	-0.041321	0.843789	567.327	586.216	403.98	607.75	NM_023928	ref|Homo sapiens acetoacetyl-CoA synthetase (AACS), mRNA [NM_023928]	acetoacetyl-CoA synthetase	ref|NM_023928|ens|ENST00000538851|ens|ENST00000536118|ens|ENST00000543665	GO:0007584|GO:0042493|GO:0045471|GO:0034201|GO:0005524|GO:0014074|GO:0047760|GO:0005829|GO:0001889|GO:0071397|GO:0042594|GO:0071394|GO:0050872|GO:0006631|GO:0032024|GO:0071333|GO:0060612|GO:0030729	GO:0005524=ATP binding|GO:0030729=acetoacetate-CoA ligase activity|GO:0047760=butyrate-CoA ligase activity	GO:0005829=cytosol	GO:0014074=response to purine-containing compound|GO:0042594=response to starvation|GO:0007584=response to nutrient|GO:0006631=fatty acid metabolic process|GO:0060612=adipose tissue development|GO:0071394=cellular response to testosterone stimulus|GO:0050872=white fat cell differentiation|GO:0045471=response to ethanol|GO:0071333=cellular response to glucose stimulus|GO:0042493=response to drug|G…	NP1467485	ENST00000316543	Hs.656073	65985
AACSP1	0.175746	Detected	-0.175746	Detected	0	-0.336671	Detected	0.265696	Detected	-0.0354874	0.928225	29	22.4	16.5	29.3	NR_024035	ref|Homo sapiens acetoacetyl-CoA synthetase pseudogene 1 (AACSP1), non-coding RNA [NR_024035]	acetoacetyl-CoA synthetase pseudogene 1	ref|NR_024035|ens|ENST00000521412|ens|ENST00000503486|linc|TCONS_l2_00023283					THC2631045	ENST00000521412	Hs.382790	729522
AADAC	-0.0354967	Compromised	0.0354962	Compromised	-2.375e-07	0.490628	Compromised	-0.0986762	Compromised	0.195976	0.57692	2.0136	2.08451	2.35338	1.82956	NM_001086	ref|Homo sapiens arylacetamide deacetylase (AADAC), mRNA [NM_001086]	arylacetamide deacetylase	ref|NM_001086|ens|ENST00000232892|ref|XM_005247103|ref|XM_005247104	GO:0004806|GO:0008152|GO:0019213|GO:0005789|GO:0010898|GO:0017171|GO:0016021|GO:0003824|GO:0016298	GO:0017171=serine hydrolase activity|GO:0003824=catalytic activity|GO:0004806=triglyceride lipase activity|GO:0016298=lipase activity|GO:0019213=deacetylase activity	GO:0005789=endoplasmic reticulum membrane|GO:0016021=integral component of membrane	GO:0008152=metabolic process|GO:0010898=positive regulation of triglyceride catabolic process	THC2472269	ENST00000232892	Hs.506908	13
AADACL2	-0.0517616	Compromised	0.0517616	Compromised	0	0.170934	Compromised	0.00626612	Compromised	0.0886002	0.458448	1.7	1.8	1.61	1.68	NM_207365	ref|Homo sapiens arylacetamide deacetylase-like 2 (AADACL2), mRNA [NM_207365]	arylacetamide deacetylase-like 2	ref|NM_207365|ens|ENST00000356517|ens|ENST00000570799|gb|BC065724	GO:0052689|GO:0008152|GO:0005576|GO:0016021	GO:0052689=carboxylic ester hydrolase activity	GO:0016021=integral component of membrane|GO:0005576=extracellular region	GO:0008152=metabolic process	THC2480355	ENST00000356517	Hs.144710	344752
AADACL2-AS1	-0.168787	Compromised	0.168786	Compromised	-2.4e-07	0.0899849	Compromised	0.758947	Detected	0.424466	0.374773	5.87	7.31	5.7	10.6	NR_110203	ref|Homo sapiens AADACL2 antisense RNA 1 (AADACL2-AS1), transcript variant 2, long non-coding RNA [NR_110203]	AADACL2 antisense RNA 1	ref|NR_110203|ref|NR_110202|linc|lnc-IGSF10-2:1|linc|lnc-IGSF10-2:2					THC2645463		Hs.680207	101928142
AADACL3	-0.269764	Detected	0.269764	Detected	0	-0.353619	Detected	-0.0310094	Detected	-0.192314	0.602921	33.3	47.7	25.5	37.3	NM_001103170	ref|Homo sapiens arylacetamide deacetylase-like 3 (AADACL3), transcript variant 1, mRNA [NM_001103170]	arylacetamide deacetylase-like 3	ref|NM_001103170|ref|NR_111984|ens|ENST00000620146|gb|AK127828	GO:0016787|GO:0008152	GO:0016787=hydrolase activity		GO:0008152=metabolic process	THC2604262	ENST00000359318	Hs.464705	126767
AADACL4	0.168767	Compromised	-0.168768	Compromised	-2.4e-07	-0.0470252	Compromised	-0.313508	Compromised	-0.180266	0.490064	2.59	2.02	1.81	1.76	NM_001013630	ref|Homo sapiens arylacetamide deacetylase-like 4 (AADACL4), mRNA [NM_001013630]	arylacetamide deacetylase-like 4	ref|NM_001013630|ens|ENST00000376221|ref|XM_006710608|tc|THC2661558	GO:0052689|GO:0008152|GO:0016021	GO:0052689=carboxylic ester hydrolase activity	GO:0016021=integral component of membrane	GO:0008152=metabolic process	THC2661558	ENST00000376221	Hs.209954	343066
AADACP1	-0.210574	Detected	0.210574	Detected	0	-0.369766	Detected	-0.041899	Detected	-0.205832	0.521189	19.4	25.6	14.1	20.7	NR_026915	ref|Homo sapiens arylacetamide deacetylase pseudogene 1 (AADACP1), non-coding RNA [NR_026915]	arylacetamide deacetylase pseudogene 1	ref|NR_026915|ens|ENST00000483636|linc|lnc-AADACL2-1:2|linc|TCONS_l2_00018935					THC2608394	ENST00000483636	Hs.383050	201651
AADAT	0.0487912	Detected	-0.0487912	Detected	0	-0.138632	Detected	-0.31668	Detected	-0.227656	0.154151	456	420	325	336	NM_016228	ref|Homo sapiens aminoadipate aminotransferase (AADAT), transcript variant 1, mRNA [NM_016228]	aminoadipate aminotransferase	ref|NM_016228|ref|NM_001286683|ref|NM_001286682|ref|NM_182662	GO:0070189|GO:0006569|GO:0006536|GO:0009058|GO:0033512|GO:0047536|GO:0044281|GO:0042803|GO:0034641|GO:0097052|GO:0019441|GO:0005759|GO:0006103|GO:0030170|GO:0016212|GO:0006554	GO:0030170=pyridoxal phosphate binding|GO:0042803=protein homodimerization activity|GO:0047536=2-aminoadipate transaminase activity|GO:0016212=kynurenine-oxoglutarate transaminase activity	GO:0005759=mitochondrial matrix	GO:0009058=biosynthetic process|GO:0097052=L-kynurenine metabolic process|GO:0006103=2-oxoglutarate metabolic process|GO:0006554=lysine catabolic process|GO:0044281=small molecule metabolic process|GO:0006569=tryptophan catabolic process|GO:0006536=glutamate metabolic process|GO:0070189=kynurenine metabolic process|GO:0019441=tryptophan catabolic process to kynurenine|GO:0034641=cellular nitrogen…	THC2488049	ENST00000353187	Hs.529735	51166
AAED1	-0.020345	Detected	0.020345	Detected	0	-0.114584	Detected	0.00448251	Detected	-0.0550509	0.473839	292	296	222	282	NM_153698	ref|Homo sapiens AhpC/TSA antioxidant enzyme domain containing 1 (AAED1), mRNA [NM_153698]	AhpC/TSA antioxidant enzyme domain containing 1	ref|NM_153698|ref|XM_005251783|ref|XM_005251784|gb|BC136503					THC2498207	ENST00000375234	Hs.44640	195827
AAGAB	-0.00388145	Detected	0.00388193	Detected	2.384e-07	-0.172604	Detected	-0.224477	Detected	-0.198541	0.0170043	10900	10800	7870	8880	NM_024666	ref|Homo sapiens alpha- and gamma-adaptin binding protein (AAGAB), transcript variant 1, mRNA [NM_024666]	alpha- and gamma-adaptin binding protein	ref|NM_024666|ref|NM_001271886|ref|NM_001271885|ens|ENST00000538028	GO:0005737|GO:0005654|GO:0015031|GO:0005829		GO:0005737=cytoplasm|GO:0005829=cytosol|GO:0005654=nucleoplasm	GO:0015031=protein transport	THC2601734	ENST00000538028	Hs.254642	79719
AAK1	-0.0564861	Detected	0.0564861	Detected	0	-0.169208	Detected	-0.0868182	Detected	-0.128013	0.20857	137.886	146.957	103.497	128.169	NM_014911	ref|Homo sapiens AP2 associated kinase 1 (AAK1), mRNA [NM_014911]	AP2 associated kinase 1	ref|NM_014911|ens|ENST00000409085|ens|ENST00000339092|tc|THC2684828	GO:0045747|GO:0005515|GO:0035612|GO:0030136|GO:0050821|GO:0005112|GO:0005524|GO:0006897|GO:0032880|GO:0005905|GO:0046777|GO:0004674|GO:0043195|GO:2000369|GO:0006468|GO:0031252|GO:0019897	GO:0005112=Notch binding|GO:0004674=protein serine/threonine kinase activity|GO:0005524=ATP binding|GO:0005515=protein binding|GO:0035612=AP-2 adaptor complex binding	GO:0031252=cell leading edge|GO:0043195=terminal bouton|GO:0005905=coated pit|GO:0030136=clathrin-coated vesicle|GO:0019897=extrinsic component of plasma membrane	GO:0032880=regulation of protein localization|GO:0046777=protein autophosphorylation|GO:0006897=endocytosis|GO:0006468=protein phosphorylation|GO:0045747=positive regulation of Notch signaling pathway|GO:0050821=protein stabilization|GO:2000369=regulation of clathrin-mediated endocytosis	THC2574997	ENST00000406297		22848
AAMDC	-0.0549355	Detected	0.054935	Detected	-2.375e-07	0.318803	Detected	0.337507	Detected	0.328155	0.0276467	2520	2680	2650	3140	NM_024684	ref|Homo sapiens adipogenesis associated, Mth938 domain containing (AAMDC), mRNA [NM_024684]	adipogenesis associated, Mth938 domain containing	ref|NM_024684|ens|ENST00000526415|ens|ENST00000393427|ens|ENST00000526164	GO:0043066|GO:0005737|GO:0045944|GO:0045600		GO:0005737=cytoplasm	GO:0043066=negative regulation of apoptotic process|GO:0045600=positive regulation of fat cell differentiation|GO:0045944=positive regulation of transcription from RNA polymerase II promoter	THC2473324	ENST00000526415	Hs.745040	28971
AAMP	-0.0198183	Detected	0.0198188	Detected	2.385e-07	0.0846944	Detected	0.101281	Detected	0.0929875	0.0494531	4630	4690	4040	4780	NM_001087	ref|Homo sapiens angio-associated, migratory cell protein (AAMP), transcript variant 2, mRNA [NM_001087]	angio-associated, migratory cell protein	ref|NM_001087|ref|NM_001302545|ens|ENST00000489767|ens|ENST00000494720	GO:0010595|GO:0005737|GO:0009986|GO:0005886|GO:0014909|GO:0001525|GO:0008201|GO:0030154	GO:0008201=heparin binding	GO:0005737=cytoplasm|GO:0005886=plasma membrane|GO:0009986=cell surface	GO:0014909=smooth muscle cell migration|GO:0001525=angiogenesis|GO:0030154=cell differentiation|GO:0010595=positive regulation of endothelial cell migration	THC2561212	ENST00000489767	Hs.83347	14
AANAT	0.188579	Detected	-0.188579	Detected	0	-0.974948	Compromised	0.196912	Detected	-0.389018	0.591993	19.9	15.1	7.21	19	NM_001166579	ref|Homo sapiens aralkylamine N-acetyltransferase (AANAT), transcript variant 1, mRNA [NM_001166579]	aralkylamine N-acetyltransferase	ref|NM_001166579|ref|NM_001088|ref|NR_110548|ens|ENST00000250615	GO:0051412|GO:0032868|GO:0048471|GO:0030187|GO:0044281|GO:0010043|GO:0005829|GO:0071889|GO:0051592|GO:0034641|GO:0046219|GO:0034695|GO:0004060|GO:0007623|GO:0009416|GO:0004059|GO:0071320|GO:0046688|GO:0034097|GO:0006474	GO:0004060=arylamine N-acetyltransferase activity|GO:0004059=aralkylamine N-acetyltransferase activity|GO:0071889=14-3-3 protein binding	GO:0048471=perinuclear region of cytoplasm|GO:0005829=cytosol	GO:0034097=response to cytokine|GO:0010043=response to zinc ion|GO:0034695=response to prostaglandin E|GO:0046688=response to copper ion|GO:0006474=N-terminal protein amino acid acetylation|GO:0046219=indolalkylamine biosynthetic process|GO:0007623=circadian rhythm|GO:0009416=response to light stimulus|GO:0044281=small molecule metabolic process|GO:0051412=response to corticosterone|GO:0032868=re…	THC2490308	ENST00000250615	Hs.431417	15
AAR2	0.0562613	Detected	-0.0562613	Detected	0	0.0157392	Detected	0.101615	Detected	0.058677	0.494257	1470	1340	1160	1440	NM_015511	ref|Homo sapiens AAR2 splicing factor homolog (S. cerevisiae) (AAR2), transcript variant 1, mRNA [NM_015511]	AAR2 splicing factor homolog (S. cerevisiae)	ref|NM_015511|ref|NM_001271874|ens|ENST00000373932|ens|ENST00000320849					THC2466790	ENST00000373932	Hs.11314	25980
AARD	0.153661	Detected	-0.153661	Compromised	0	-1.12756	Compromised	-0.132336	Compromised	-0.629947	0.350014	11.2	8.92	3.74	8.72	NM_001025357	ref|Homo sapiens alanine and arginine rich domain containing protein (AARD), mRNA [NM_001025357]	alanine and arginine rich domain containing protein	ref|NM_001025357|ens|ENST00000378279|gb|BC142621|tc|THC2533349	GO:0030324			GO:0030324=lung development	THC2533349	ENST00000378279	Hs.437551	441376
AARS	0.0181065	Detected	-0.0181069	Detected	-2.385e-07	0.0954432	Detected	0.0975204	Detected	0.0964818	0.0335666	3340	3210	2860	3350	NM_001605	ref|Homo sapiens alanyl-tRNA synthetase (AARS), mRNA [NM_001605]	alanyl-tRNA synthetase	ref|NM_001605|ens|ENST00000569825|ens|ENST00000261772|gb|DQ891634	GO:0010467|GO:0002161|GO:0000049|GO:0006419|GO:0004813|GO:0005524|GO:0006400|GO:0008033|GO:0030968|GO:0005829|GO:0006418|GO:0043524|GO:0005737|GO:0016020|GO:0021680|GO:0006457|GO:0050885|GO:0008270|GO:0006450|GO:0043200|GO:0016597|GO:0001942|GO:0070062	GO:0008270=zinc ion binding|GO:0002161=aminoacyl-tRNA editing activity|GO:0000049=tRNA binding|GO:0005524=ATP binding|GO:0004813=alanine-tRNA ligase activity|GO:0016597=amino acid binding	GO:0070062=extracellular exosome|GO:0005737=cytoplasm|GO:0016020=membrane|GO:0005829=cytosol	GO:0008033=tRNA processing|GO:0006450=regulation of translational fidelity|GO:0043200=response to amino acid|GO:0006457=protein folding|GO:0006400=tRNA modification|GO:0043524=negative regulation of neuron apoptotic process|GO:0006418=tRNA aminoacylation for protein translation|GO:0021680=cerebellar Purkinje cell layer development|GO:0001942=hair follicle development|GO:0030968=endoplasmic reticu…	THC2576320	ENST00000569825	Hs.315137	16
AARS2	0.0363266	Detected	-0.0363266	Detected	0	-0.142496	Detected	-0.0116303	Detected	-0.0770633	0.411387	1590	1490	1140	1460	NM_020745	ref|Homo sapiens alanyl-tRNA synthetase 2, mitochondrial (AARS2), mRNA [NM_020745]	alanyl-tRNA synthetase 2, mitochondrial	ref|NM_020745|ens|ENST00000244571|ref|XM_005249245|gb|AB033096	GO:0005739|GO:0010467|GO:0000049|GO:0033108|GO:0070143|GO:0004813|GO:0008270|GO:0005524|GO:0006418	GO:0005524=ATP binding|GO:0008270=zinc ion binding|GO:0004813=alanine-tRNA ligase activity|GO:0000049=tRNA binding	GO:0005739=mitochondrion	GO:0006418=tRNA aminoacylation for protein translation|GO:0070143=mitochondrial alanyl-tRNA aminoacylation|GO:0010467=gene expression|GO:0033108=mitochondrial respiratory chain complex assembly	THC2491596	ENST00000244571	Hs.158381	57505
AASDH	0.0908773	Detected	-0.0908773	Detected	0	-0.134967	Detected	-0.169812	Detected	-0.15239	0.241336	183	159	127	145	NM_181806	ref|Homo sapiens aminoadipate-semialdehyde dehydrogenase (AASDH), transcript variant 1, mRNA [NM_181806]	aminoadipate-semialdehyde dehydrogenase	ref|NM_181806|ref|NM_001286672|ref|NM_001286671|ref|NM_001286669	GO:0006631|GO:0016878|GO:0005524	GO:0005524=ATP binding|GO:0016878=acid-thiol ligase activity		GO:0006631=fatty acid metabolic process	THC2703687	ENST00000502617	Hs.104347	132949
AASDHPPT	0.0479469	Detected	-0.0479474	Detected	-2.385e-07	-0.27784	Detected	-0.373061	Detected	-0.32545	0.0405048	2440	2250	1580	1730	NM_015423	ref|Homo sapiens aminoadipate-semialdehyde dehydrogenase-phosphopantetheinyl transferase (AASDHPPT), mRNA [NM_015423]	aminoadipate-semialdehyde dehydrogenase-phosphopantetheinyl transferase	ref|NM_015423|ens|ENST00000534152|ens|ENST00000278618|gb|AB072896	GO:0005515|GO:0000287|GO:0015939|GO:0009059|GO:0006766|GO:0006767|GO:0044281|GO:0008897|GO:0070062|GO:0005829	GO:0000287=magnesium ion binding|GO:0005515=protein binding|GO:0008897=holo-[acyl-carrier-protein] synthase activity	GO:0070062=extracellular exosome|GO:0005829=cytosol	GO:0044281=small molecule metabolic process|GO:0006767=water-soluble vitamin metabolic process|GO:0015939=pantothenate metabolic process|GO:0009059=macromolecule biosynthetic process|GO:0006766=vitamin metabolic process	THC2469513	ENST00000534152	Hs.524009	60496
AASS	-0.379727	Compromised	0.379728	Compromised	2.4e-07	-1.25295	Compromised	-1.53657	Compromised	-1.39476	0.0750718	4.04	6.74	1.79	1.72	NM_005763	ref|Homo sapiens aminoadipate-semialdehyde synthase (AASS), mRNA [NM_005763]	aminoadipate-semialdehyde synthase	ref|NM_005763|ens|ENST00000358954|ens|ENST00000431170|ens|ENST00000417368	GO:0005739|GO:0034641|GO:0051262|GO:0033512|GO:0005759|GO:0047130|GO:0047131|GO:0044281|GO:0006554|GO:0055114|GO:0043231	GO:0047131=saccharopine dehydrogenase (NAD+, L-glutamate-forming) activity|GO:0047130=saccharopine dehydrogenase (NADP+, L-lysine-forming) activity	GO:0005759=mitochondrial matrix|GO:0043231=intracellular membrane-bounded organelle|GO:0005739=mitochondrion	GO:0044281=small molecule metabolic process|GO:0051262=protein tetramerization|GO:0055114=oxidation-reduction process|GO:0034641=cellular nitrogen compound metabolic process|GO:0006554=lysine catabolic process|GO:0033512=L-lysine catabolic process to acetyl-CoA via saccharopine	THC2471460	ENST00000358954	Hs.156738	10157
AATBC	-0.170927	Detected	0.170927	Detected	0	-0.165508	Detected	-0.195014	Detected	-0.180261	0.403623	17.9455	22.4143	14.6193	16.7532	NR_026961	ref|Homo sapiens uncharacterized LOC284837 (AATBC), long non-coding RNA [NR_026961]	uncharacterized LOC284837	ref|NR_026961|linc|lnc-CSTB-1:6|linc|lnc-CSTB-1:8|linc|lnc-CSTB-1:9							Hs.592159	284837
AATF	-0.058054	Detected	0.0580544	Detected	2.385e-07	0.0905385	Detected	0.392771	Detected	0.241655	0.274051	2790	2980	2510	3620	NM_012138	ref|Homo sapiens apoptosis antagonizing transcription factor (AATF), mRNA [NM_012138]	apoptosis antagonizing transcription factor	ref|NM_012138|ens|ENST00000620004|ens|ENST00000619387|gb|AB385572	GO:0005515|GO:0048011|GO:0043066|GO:0005813|GO:0043065|GO:0003700|GO:0005794|GO:0042254|GO:0048156|GO:0005730|GO:0032929|GO:0005634|GO:0097190|GO:0042985|GO:0006974|GO:0043522|GO:0007346|GO:0005737|GO:0040016|GO:0045944|GO:2000378|GO:0007155|GO:0005925	GO:0043522=leucine zipper domain binding|GO:0003700=transcription factor activity, sequence-specific DNA binding|GO:0005515=protein binding|GO:0048156=tau protein binding	GO:0005794=Golgi apparatus|GO:0005730=nucleolus|GO:0005634=nucleus|GO:0005813=centrosome|GO:0005925=focal adhesion|GO:0005737=cytoplasm	GO:0040016=embryonic cleavage|GO:0042254=ribosome biogenesis|GO:0097190=apoptotic signaling pathway|GO:0007155=cell adhesion|GO:0006974=cellular response to DNA damage stimulus|GO:0045944=positive regulation of transcription from RNA polymerase II promoter|GO:0042985=negative regulation of amyloid precursor protein biosynthetic process|GO:0007346=regulation of mitotic cell cycle|GO:0048011=neurot…	THC2763179	ENST00000620004	Hs.195740	26574
AATK	0.0145743	Detected	-0.0145743	Detected	0	-0.120581	Detected	-0.137154	Detected	-0.128868	0.0165071	163.753	158.152	121.016	139.929	NM_001080395	ref|Homo sapiens apoptosis-associated tyrosine kinase (AATK), transcript variant 1, mRNA [NM_001080395]	apoptosis-associated tyrosine kinase	ref|NM_001080395|ref|NM_004920|ens|ENST00000374792|ens|ENST00000570932	GO:0005515|GO:0048471|GO:0005783|GO:0044295|GO:0051402|GO:0005524|GO:0004674|GO:0007420|GO:0030517|GO:0004713|GO:0016021|GO:0032482|GO:0055037|GO:0038083	GO:0004674=protein serine/threonine kinase activity|GO:0005524=ATP binding|GO:0004713=protein tyrosine kinase activity|GO:0005515=protein binding	GO:0005783=endoplasmic reticulum|GO:0048471=perinuclear region of cytoplasm|GO:0044295=axonal growth cone|GO:0016021=integral component of membrane|GO:0055037=recycling endosome	GO:0032482=Rab protein signal transduction|GO:0038083=peptidyl-tyrosine autophosphorylation|GO:0007420=brain development|GO:0030517=negative regulation of axon extension|GO:0051402=neuron apoptotic process	THC2471583	ENST00000374792	Hs.514575	9625
AATK-AS1	0.238463	Compromised	-0.238463	Compromised	0	-0.444313	Compromised	0.553277	Compromised	0.0544817	0.930487	3.93233	2.78446	1.98817	4.64312	NR_027255	ref|Homo sapiens AATK antisense RNA 1 (AATK-AS1), long non-coding RNA [NR_027255]	AATK antisense RNA 1	ref|NR_027255|linc|lnc-BAIAP2-2:2|linc|lnc-BAIAP2-2:1|gb|BC171777					THC2489764		Hs.591202	388428
AB020701	-0.00301647	Compromised	0.00301695	Compromised	2.384e-07	0.197549	Compromised	-0.0774288	Compromised	0.0600603	0.704935	1.93	1.91	1.8	1.74	AB020701	gb|Homo sapiens mRNA for KIAA0894 protein, partial cds. [AB020701]		gb|AB020701|tc|THC2492724|tc|THC2676699
AB051446	-0.0512953	Compromised	0.0512958	Compromised	2.385e-07	0.207314	Compromised	-0.00157928	Compromised	0.102867	0.469942	1.72	1.82	1.67	1.69	AB051446	gb|Homo sapiens mRNA for KIAA1659 protein, partial cds. [AB051446]		gb|AB051446|tc|THC2578064
AB072904	-0.23811	Compromised	0.23811	Compromised	0	-0.547158	Compromised	0.06251	Compromised	-0.242324	0.594978	4.61	6.32	3.02	5.39	AB072904	gb|Homo sapiens mRNA for putative protein product of Nbla11895, complete cds. [AB072904]		gb|AB072904|tc|THC2489892
AB088847	-0.0435753	Compromised	0.0435753	Compromised	0	0.140238	Compromised	1.20145	Compromised	0.670844	0.334759	1.92	2.01	1.77	4.32	AB088847	gb|Homo sapiens BPA-1 mRNA for brain peptide A1, complete cds. [AB088847]		gb|AB088847
AB209400	0.033201	Detected	-0.033201	Detected	0	0.114805	Detected	0.020839	Detected	0.0678217	0.359692	340	320	292	320	AB209400	gb|Homo sapiens mRNA for basic FGF-repressed Zic binding protein isoform a variant protein. [AB209400]		gb|AB209400|tc|THC2718458|tc|THC2621953
AB306153	-0.561556	Compromised	0.561556	Compromised	2.4e-07	1.02017	Compromised	1.28484	Compromised	1.15251	0.183828	1.91	4.1	4.64	6.52	AB306153	gb|Homo sapiens mRNA for T cell receptor beta variable 5, partial cds, clone: un 66. [AB306153]		gb|AB306153|gb|M97709|gb|A25490|gb|X58803
AB306238	-0.375976	Compromised	0.375977	Compromised	2.3e-07	-0.485808	Compromised	-0.440805	Compromised	-0.463307	0.343723	2.38	3.95	1.79	2.16	AB306238	gb|Homo sapiens mRNA for T cell receptor beta variable 6, partial cds, clone: un 226. [AB306238]		gb|AB306238|gb|AB305928|gb|AB305899|gb|AF397442
AB363267	-0.255028	Compromised	0.255028	Compromised	0	-1.20268	Compromised	-1.1728	Compromised	-1.18774	0.0432803	4.04	5.67	1.7	2.03	AB363267	gb|Homo sapiens IGK mRNA for immunoglobulin kappa light chain, partial cds, clone: F010-014L. [AB363267]		gb|AB363267|gb|AF103412|gb|DQ322856|gb|DQ322857
AB384543	-0.964957	Compromised	0.964957	Compromised	0	-0.420516	Compromised	0.616968	Compromised	0.0982261	0.936729	1.96	7.36	2.32	5.57	AB384543	gb|Synthetic construct DNA, clone: pF1KA0919, Homo sapiens EXOC6B gene for exocyst complex component Sec15B, complete cds, without stop codon, in Flexi system. [AB384543]		gb|AB384543|tc|THC2605866
AB385295	0.0478308	Detected	-0.0478308	Detected	0	-0.696562	Detected	-0.66217	Detected	-0.679366	0.00555098	386	356	187	224	AB385295	gb|Synthetic construct DNA, clone: pF1KA0197, Homo sapiens NUP160 gene for nucleoporin 160kDa, complete cds, without stop codon, in Flexi system. [AB385295]		gb|AB385295|gb|D83781|tc|THC2495390
AB529256	0.130355	Detected	-0.130355	Detected	0	0.0821903	Detected	-0.225178	Detected	-0.071494	0.756679	18.6	15.3	14.6	13.8	AB529256	gb|Synthetic construct DNA, clone: pF1KE0827, Homo sapiens OR4A13P gene for Putative olfactory receptor, family 4, subfamily A, member 13, without stop codon, in Flexi system. [AB529256]		gb|AB529256|tc|NP511198
ABAT	-0.0229836	Detected	0.022984	Detected	2.385e-07	-0.285402	Detected	-0.299726	Detected	-0.292564	0.00670294	4020	4090	2720	3150	NM_000663	ref|Homo sapiens 4-aminobutyrate aminotransferase (ABAT), transcript variant 2, mRNA [NM_000663]	4-aminobutyrate aminotransferase	ref|NM_000663|ens|ENST00000568847|ens|ENST00000561870|ens|ENST00000566590	GO:0043005|GO:0001666|GO:0003867|GO:0045471|GO:0042493|GO:0048148|GO:0007268|GO:0045776|GO:0047298|GO:0042803|GO:0007269|GO:0005739|GO:0032145|GO:0032144|GO:0005759|GO:0010039|GO:0030170|GO:0009450|GO:0007626|GO:0042135|GO:0007620|GO:0070062|GO:0035094	GO:0030170=pyridoxal phosphate binding|GO:0042803=protein homodimerization activity|GO:0003867=4-aminobutyrate transaminase activity|GO:0047298=(S)-3-amino-2-methylpropionate transaminase activity|GO:0032145=succinate-semialdehyde dehydrogenase binding	GO:0043005=neuron projection|GO:0070062=extracellular exosome|GO:0005759=mitochondrial matrix|GO:0005739=mitochondrion|GO:0032144=4-aminobutyrate transaminase complex	GO:0009450=gamma-aminobutyric acid catabolic process|GO:0007268=synaptic transmission|GO:0045776=negative regulation of blood pressure|GO:0007620=copulation|GO:0042135=neurotransmitter catabolic process|GO:0035094=response to nicotine|GO:0007269=neurotransmitter secretion|GO:0045471=response to ethanol|GO:0001666=response to hypoxia|GO:0007626=locomotory behavior|GO:0048148=behavioral response to…	THC2608590	ENST00000396600	Hs.336768	18
ABCA1	-0.145896	Detected	0.145896	Detected	0	0.154624	Detected	0.21317	Detected	0.183897	0.341979	27.0788	32.6683	27.0666	32.9694	NM_005502	ref|Homo sapiens ATP-binding cassette, sub-family A (ABC1), member 1 (ABCA1), mRNA [NM_005502]	ATP-binding cassette, sub-family A (ABC1), member 1	ref|NM_005502|ens|ENST00000374733|ens|ENST00000423487|ens|ENST00000374736	GO:0005515|GO:0008509|GO:0031267|GO:0071300|GO:0071397|GO:0034364|GO:0006497|GO:0051117|GO:0044255|GO:0019905|GO:0042632|GO:0033344|GO:0005794|GO:0010745|GO:0050702|GO:0043691|GO:0005548|GO:0038027|GO:0055098|GO:0007186|GO:0005887|GO:0042157|GO:0055091|GO:0045121|GO:0007040|GO:0009897|GO:0032367|GO:0048471|GO:0005886|GO:0017127|GO:0030819|GO:0030139|GO:0044281|GO:0010875|GO:0045332|GO:0005543|GO:…	GO:0016887=ATPase activity|GO:0005548=phospholipid transporter activity|GO:0034185=apolipoprotein binding|GO:0015485=cholesterol binding|GO:0019905=syntaxin binding|GO:0034188=apolipoprotein A-I receptor activity|GO:0034186=apolipoprotein A-I binding|GO:0005515=protein binding|GO:0008509=anion transmembrane transporter activity|GO:0031267=small GTPase binding|GO:0005524=ATP binding|GO:0017127=cho…	GO:0005794=Golgi apparatus|GO:0045335=phagocytic vesicle|GO:0005886=plasma membrane|GO:0030139=endocytic vesicle|GO:0009897=external side of plasma membrane|GO:0005887=integral component of plasma membrane|GO:0034364=high-density lipoprotein particle|GO:0048471=perinuclear region of cytoplasm|GO:0045121=membrane raft	GO:0055098=response to low-density lipoprotein particle|GO:0055091=phospholipid homeostasis|GO:0044281=small molecule metabolic process|GO:0006911=phagocytosis, engulfment|GO:0045332=phospholipid translocation|GO:0032367=intracellular cholesterol transport|GO:0032489=regulation of Cdc42 protein signal transduction|GO:0060155=platelet dense granule organization|GO:0038027=apolipoprotein A-I-mediat…	THC2499682	ENST00000374736	Hs.659274	19
ABCA10	0.246317	Detected	-0.246316	Compromised	1.2e-07	0.0749221	Compromised	-0.0363259	Compromised	0.0192981	0.94604	9.38	6.57	6.76	7.32	NM_080282	ref|Homo sapiens ATP-binding cassette, sub-family A (ABC1), member 10 (ABCA10), mRNA [NM_080282]	ATP-binding cassette, sub-family A (ABC1), member 10	ref|NM_080282|ref|NR_002451|ens|ENST00000518929|ens|ENST00000523419	GO:0005215|GO:0008152|GO:0006810|GO:0016021|GO:0016887|GO:0005524	GO:0016887=ATPase activity|GO:0005524=ATP binding|GO:0005215=transporter activity	GO:0016021=integral component of membrane	GO:0008152=metabolic process|GO:0006810=transport	THC2508298	ENST00000518929	Hs.25377	10349
ABCA11P	0.0799422	Detected	-0.0799422	Detected	0	-0.280607	Detected	-0.808056	Detected	-0.544332	0.186912	77.2	68.1	48.8	39.6	NR_002451	ref|Homo sapiens ATP-binding cassette, sub-family A (ABC1), member 11, pseudogene (ABCA11P), non-coding RNA [NR_002451]	ATP-binding cassette, sub-family A (ABC1), member 11, pseudogene	ref|NR_002451|ens|ENST00000515578|ens|ENST00000507854|ens|ENST00000514396	GO:0005215|GO:0008152|GO:0006810|GO:0016021|GO:0016887|GO:0005524	GO:0016887=ATPase activity|GO:0005524=ATP binding|GO:0005215=transporter activity	GO:0016021=integral component of membrane	GO:0008152=metabolic process|GO:0006810=transport	THC2488382	ENST00000515578	Hs.745030	79963
ABCA12	-0.0526655	Detected	0.0526655	Detected	0	0.063587	Detected	0.0756776	Detected	0.0696323	0.319455	1330	1410	1170	1380	NM_173076	ref|Homo sapiens ATP-binding cassette, sub-family A (ABC1), member 12 (ABCA12), transcript variant 1, mRNA [NM_173076]	ATP-binding cassette, sub-family A (ABC1), member 12	ref|NM_173076|ref|NM_015657|ref|NR_103740|ens|ENST00000272895	GO:0005515|GO:0097209|GO:0005886|GO:0005743|GO:0031424|GO:0061436|GO:0010875|GO:0005829|GO:0045055|GO:0005737|GO:0034191|GO:2000010|GO:0043129|GO:0019725|GO:0035627|GO:0048286|GO:0005102|GO:0055088|GO:0005524|GO:0072659|GO:0033700|GO:0034040|GO:0008152|GO:0006869|GO:0016021|GO:0032940|GO:0005319	GO:0034191=apolipoprotein A-I receptor binding|GO:0005524=ATP binding|GO:0034040=lipid-transporting ATPase activity|GO:0005102=receptor binding|GO:0005515=protein binding|GO:0005319=lipid transporter activity	GO:0005829=cytosol|GO:0097209=epidermal lamellar body|GO:0005886=plasma membrane|GO:0005743=mitochondrial inner membrane|GO:0005737=cytoplasm|GO:0016021=integral component of membrane	GO:0061436=establishment of skin barrier|GO:0043129=surfactant homeostasis|GO:0048286=lung alveolus development|GO:0045055=regulated secretory pathway|GO:0010875=positive regulation of cholesterol efflux|GO:0032940=secretion by cell|GO:0019725=cellular homeostasis|GO:2000010=positive regulation of protein localization to cell surface|GO:0055088=lipid homeostasis|GO:0008152=metabolic process|GO:00…	THC2475173	ENST00000272895	Hs.134585	26154
ABCA13	2.3303	Detected	-2.3303	Compromised	0	-2.36257	Compromised	-2.20769	Compromised	-2.28513	0.430395	58	2.26	1.82	2.37	NM_152701	ref|Homo sapiens ATP-binding cassette, sub-family A (ABC1), member 13 (ABCA13), mRNA [NM_152701]	ATP-binding cassette, sub-family A (ABC1), member 13	ref|NM_152701|ens|ENST00000435803|gb|AK091270|gb|AX746886	GO:0005215|GO:0008152|GO:0006810|GO:0016021|GO:0016887|GO:0005524	GO:0016887=ATPase activity|GO:0005524=ATP binding|GO:0005215=transporter activity	GO:0016021=integral component of membrane	GO:0008152=metabolic process|GO:0006810=transport	THC2472189	ENST00000435803	Hs.226568	154664
ABCA17P	-0.0597324	Compromised	0.0597324	Compromised	0	0.198369	Compromised	-0.00170469	Compromised	0.0983319	0.487547	1.7	1.82	1.65	1.68	NR_003574	ref|Homo sapiens ATP-binding cassette, sub-family A (ABC1), member 17, pseudogene (ABCA17P), non-coding RNA [NR_003574]	ATP-binding cassette, sub-family A (ABC1), member 17, pseudogene	ref|NR_003574|ens|ENST00000494925|ens|ENST00000469908|gb|DQ266102					THC2731745	ENST00000494925	Hs.376281	650655
ABCA2	-0.171929	Detected	0.171929	Detected	0	0.076257	Detected	2.14182	Detected	1.10904	0.400507	37.0799	46.3778	35.7428	175	NM_001606	ref|Homo sapiens ATP-binding cassette, sub-family A (ABC1), member 2 (ABCA2), transcript variant 1, mRNA [NM_001606]	ATP-binding cassette, sub-family A (ABC1), member 2	ref|NM_001606|ref|NM_212533|ens|ENST00000464520|ens|ENST00000459850	GO:0042632|GO:0006629|GO:0005815|GO:0006357|GO:0042493|GO:0042626|GO:0048545|GO:0005765|GO:0055085|GO:0005524|GO:0005764|GO:0000166|GO:0016020|GO:0006810|GO:0016023|GO:0016021|GO:0032383|GO:0043190|GO:0016887|GO:0010008|GO:0005768	GO:0016887=ATPase activity|GO:0042626=ATPase activity, coupled to transmembrane movement of substances|GO:0000166=nucleotide binding|GO:0005524=ATP binding	GO:0005765=lysosomal membrane|GO:0005764=lysosome|GO:0005768=endosome|GO:0005815=microtubule organizing center|GO:0016020=membrane|GO:0016021=integral component of membrane|GO:0016023=cytoplasmic membrane-bounded vesicle|GO:0010008=endosome membrane|GO:0043190=ATP-binding cassette (ABC) transporter complex	GO:0055085=transmembrane transport|GO:0032383=regulation of intracellular cholesterol transport|GO:0048545=response to steroid hormone|GO:0042632=cholesterol homeostasis|GO:0006810=transport|GO:0006357=regulation of transcription from RNA polymerase II promoter|GO:0042493=response to drug|GO:0006629=lipid metabolic process	THC2617219	ENST00000464520	Hs.421202	20
ABCA3	-0.105443	Detected	0.105443	Detected	0	0.188193	Detected	0.179112	Detected	0.183653	0.223967	1920	2190	1910	2220	NM_001089	ref|Homo sapiens ATP-binding cassette, sub-family A (ABC1), member 3 (ABCA3), mRNA [NM_001089]	ATP-binding cassette, sub-family A (ABC1), member 3	ref|NM_001089|ens|ENST00000301732|gb|BC140895|gb|BC146866	GO:0005215|GO:0097233|GO:0005886|GO:0097208|GO:0042493|GO:0042626|GO:0005524|GO:0005615|GO:0055085|GO:0016020|GO:0008152|GO:0006810|GO:0016021	GO:0042626=ATPase activity, coupled to transmembrane movement of substances|GO:0005215=transporter activity|GO:0005524=ATP binding	GO:0005886=plasma membrane|GO:0005615=extracellular space|GO:0097233=alveolar lamellar body membrane|GO:0016020=membrane|GO:0016021=integral component of membrane|GO:0097208=alveolar lamellar body	GO:0055085=transmembrane transport|GO:0008152=metabolic process|GO:0006810=transport|GO:0042493=response to drug	THC2462218	ENST00000301732	Hs.26630	21
ABCA4	0.816902	Compromised	-0.816902	Compromised	0	-1.21691	Compromised	-0.476148	Compromised	-0.84653	0.444899	8.88	2.82	1.76	3.44	NM_000350	ref|Homo sapiens ATP-binding cassette, sub-family A (ABC1), member 4 (ABCA4), mRNA [NM_000350]	ATP-binding cassette, sub-family A (ABC1), member 4	ref|NM_000350|ens|ENST00000370225|ens|ENST00000536513|gb|U88667	GO:0005215|GO:0006649|GO:0007603|GO:0042626|GO:0045494|GO:0055085|GO:0001523|GO:0005524|GO:0045332|GO:0016020|GO:0005887|GO:0004012|GO:0006810|GO:0007601	GO:0042626=ATPase activity, coupled to transmembrane movement of substances|GO:0004012=phospholipid-translocating ATPase activity|GO:0005215=transporter activity|GO:0005524=ATP binding	GO:0005887=integral component of plasma membrane|GO:0016020=membrane	GO:0055085=transmembrane transport|GO:0007601=visual perception|GO:0006810=transport|GO:0006649=phospholipid transfer to membrane|GO:0007603=phototransduction, visible light|GO:0001523=retinoid metabolic process|GO:0045332=phospholipid translocation|GO:0045494=photoreceptor cell maintenance	THC2464953	ENST00000370225	Hs.416707	24
ABCA5	-0.051959	Detected	0.051959	Detected	0	-0.121505	Detected	0.0857267	Detected	-0.017889	0.891516	203	215	157	212	NM_018672	ref|Homo sapiens ATP-binding cassette, sub-family A (ABC1), member 5 (ABCA5), transcript variant 1, mRNA [NM_018672]	ATP-binding cassette, sub-family A (ABC1), member 5	ref|NM_018672|ref|NM_172232|ens|ENST00000586601|ens|ENST00000586995	GO:0005215|GO:0033344|GO:0010745|GO:0005770|GO:0043691|GO:0005765|GO:0005524|GO:0005764|GO:0000139|GO:0008152|GO:0031902|GO:0034375|GO:0016021|GO:0016887	GO:0016887=ATPase activity|GO:0005215=transporter activity|GO:0005524=ATP binding	GO:0005770=late endosome|GO:0000139=Golgi membrane|GO:0005765=lysosomal membrane|GO:0005764=lysosome|GO:0031902=late endosome membrane|GO:0016021=integral component of membrane	GO:0034375=high-density lipoprotein particle remodeling|GO:0008152=metabolic process|GO:0043691=reverse cholesterol transport|GO:0033344=cholesterol efflux|GO:0010745=negative regulation of macrophage derived foam cell differentiation	NP710343	ENST00000586601	Hs.731824	23461
ABCA6	0.606095	Compromised	-0.606095	Compromised	2.3e-07	-0.495045	Compromised	0.0558443	Compromised	-0.2196	0.772854	4.89	2.08	1.85	3.17	NM_080284	ref|Homo sapiens ATP-binding cassette, sub-family A (ABC1), member 6 (ABCA6), mRNA [NM_080284]	ATP-binding cassette, sub-family A (ABC1), member 6	ref|NM_080284|ens|ENST00000284425|ref|XM_006721791|ref|XM_006721792	GO:0005215|GO:0008152|GO:0006810|GO:0016021|GO:0016887|GO:0005524	GO:0016887=ATPase activity|GO:0005524=ATP binding|GO:0005215=transporter activity	GO:0016021=integral component of membrane	GO:0008152=metabolic process|GO:0006810=transport	THC2470497	ENST00000284425	Hs.709514	23460
ABCA7	0.00883508	Detected	-0.00883508	Detected	0	0.13769	Detected	0.0353568	Detected	0.0865235	0.237568	151	147	134	146	NM_019112	ref|Homo sapiens ATP-binding cassette, sub-family A (ABC1), member 7 (ABCA7), mRNA [NM_019112]	ATP-binding cassette, sub-family A (ABC1), member 7	ref|NM_019112|ens|ENST00000263094|ens|ENST00000433129|ref|XM_006722616	GO:0006909|GO:0005215|GO:0017121|GO:0034504|GO:0005886|GO:1900223|GO:0010875|GO:0050766|GO:0005737|GO:0016324|GO:0034380|GO:0007613|GO:0070374|GO:0043190|GO:0016887|GO:0033344|GO:0005794|GO:0009986|GO:0001891|GO:0032587|GO:0032780|GO:0005548|GO:0032781|GO:0055085|GO:0038027|GO:0005524|GO:0042985|GO:0033700|GO:0018149|GO:0000139|GO:0016021|GO:0010008|GO:0034188	GO:0016887=ATPase activity|GO:0005215=transporter activity|GO:0005524=ATP binding|GO:0005548=phospholipid transporter activity|GO:0034188=apolipoprotein A-I receptor activity	GO:0005794=Golgi apparatus|GO:0000139=Golgi membrane|GO:0001891=phagocytic cup|GO:0032587=ruffle membrane|GO:0043190=ATP-binding cassette (ABC) transporter complex|GO:0005886=plasma membrane|GO:0009986=cell surface|GO:0005737=cytoplasm|GO:0016021=integral component of membrane|GO:0010008=endosome membrane|GO:0016324=apical plasma membrane	GO:0007613=memory|GO:0017121=phospholipid scrambling|GO:0010875=positive regulation of cholesterol efflux|GO:0034504=protein localization to nucleus|GO:0034380=high-density lipoprotein particle assembly|GO:0055085=transmembrane transport|GO:0038027=apolipoprotein A-I-mediated signaling pathway|GO:0032780=negative regulation of ATPase activity|GO:0032781=positive regulation of ATPase activity|GO:1…	THC2634543	ENST00000263094	Hs.134514	10347
ABCA8	-0.0527787	Compromised	0.0527787	Compromised	0	0.167427	Compromised	-0.0111594	Compromised	0.0781336	0.529883	1.73989	1.84483	1.64493	1.69997	NM_007168	ref|Homo sapiens ATP-binding cassette, sub-family A (ABC1), member 8 (ABCA8), transcript variant 2, mRNA [NM_007168]	ATP-binding cassette, sub-family A (ABC1), member 8	ref|NM_007168|ref|NM_001288986|ref|NM_001288985|ens|ENST00000615593	GO:0005886|GO:0008152|GO:0006810|GO:0005743|GO:0042626|GO:0016021|GO:0055085|GO:0005524	GO:0005524=ATP binding|GO:0042626=ATPase activity, coupled to transmembrane movement of substances	GO:0016021=integral component of membrane|GO:0005886=plasma membrane|GO:0005743=mitochondrial inner membrane	GO:0055085=transmembrane transport|GO:0008152=metabolic process|GO:0006810=transport	THC2463630	ENST00000430352	Hs.58351	10351
ABCA9	0.0338507	Detected	-0.0338502	Detected	2.385e-07	0.134722	Detected	0.434438	Detected	0.28458	0.205172	4860	4570	4230	6090	NM_080283	ref|Homo sapiens ATP-binding cassette, sub-family A (ABC1), member 9 (ABCA9), mRNA [NM_080283]	ATP-binding cassette, sub-family A (ABC1), member 9	ref|NM_080283|ens|ENST00000340001|ref|XM_005256935|ref|XM_006721633	GO:0005739|GO:0005215|GO:0008152|GO:0006810|GO:0016021|GO:0016887|GO:0005524	GO:0016887=ATPase activity|GO:0005524=ATP binding|GO:0005215=transporter activity	GO:0005739=mitochondrion|GO:0016021=integral component of membrane	GO:0008152=metabolic process|GO:0006810=transport	NP590209	ENST00000340001	Hs.131686	10350
ABCA9-AS1	-0.0274248	Compromised	0.0274253	Compromised	2.39e-07	0.122501	Compromised	-0.142041	Compromised	-0.00976992	0.948924	2.11	2.16	1.9	1.85	NR_126414	ref|Homo sapiens ABCA9 antisense RNA 1 (ABCA9-AS1), long non-coding RNA [NR_126414]	ABCA9 antisense RNA 1	ref|NR_126414|linc|lnc-MAP2K6-3:1|gb|CB960713|tc|THC2717445					THC2717445		Hs.569827	104355297
ABCB1	-0.175864	Compromised	0.175864	Compromised	0	0.066967	Compromised	0.0766745	Compromised	0.0718207	0.72266	1.76819	2.22367	1.69812	1.9996	NM_000927	ref|Homo sapiens ATP-binding cassette, sub-family B (MDR/TAP), member 1 (ABCB1), mRNA [NM_000927]	ATP-binding cassette, sub-family B (MDR/TAP), member 1	ref|NM_000927|ens|ENST00000416177|ens|ENST00000543898|ens|ENST00000265724	GO:0005515|GO:0005215|GO:0005886|GO:0009986|GO:0042493|GO:0072089|GO:0042626|GO:0042908|GO:0044281|GO:0055085|GO:0005524|GO:0008559|GO:0016020|GO:0000086|GO:0006855|GO:0006810|GO:0016021|GO:0070062	GO:0042626=ATPase activity, coupled to transmembrane movement of substances|GO:0008559=xenobiotic-transporting ATPase activity|GO:0005215=transporter activity|GO:0005524=ATP binding|GO:0005515=protein binding	GO:0005886=plasma membrane|GO:0009986=cell surface|GO:0070062=extracellular exosome|GO:0016020=membrane|GO:0016021=integral component of membrane	GO:0055085=transmembrane transport|GO:0006810=transport|GO:0044281=small molecule metabolic process|GO:0006855=drug transmembrane transport|GO:0000086=G2/M transition of mitotic cell cycle|GO:0042493=response to drug|GO:0072089=stem cell proliferation|GO:0042908=xenobiotic transport	THC2464142	ENST00000475929	Hs.489033	5243
ABCB10	0.0932562	Detected	-0.0932562	Detected	0	-0.313817	Detected	-0.447791	Detected	-0.380804	0.0801399	316.961	274.485	194.001	206.788	NM_012089	ref|Homo sapiens ATP-binding cassette, sub-family B (MDR/TAP), member 10 (ABCB10), mRNA [NM_012089]	ATP-binding cassette, sub-family B (MDR/TAP), member 10	ref|NM_012089|ens|ENST00000344517|ref|XM_006711754|ref|XM_006711755	GO:0005215|GO:0032592|GO:0008152|GO:0006810|GO:0005743|GO:0042626|GO:0055085|GO:0005524|GO:0042803	GO:0005524=ATP binding|GO:0042626=ATPase activity, coupled to transmembrane movement of substances|GO:0042803=protein homodimerization activity|GO:0005215=transporter activity	GO:0032592=integral component of mitochondrial membrane|GO:0005743=mitochondrial inner membrane	GO:0055085=transmembrane transport|GO:0008152=metabolic process|GO:0006810=transport	THC2463247	ENST00000344517	Hs.17614	23456
ABCB11	-0.0510669	Compromised	0.0510664	Compromised	-2.375e-07	0.207792	Compromised	-0.00120258	Compromised	0.103295	0.468179	1.73	1.83	1.68	1.7	NM_003742	ref|Homo sapiens ATP-binding cassette, sub-family B (MDR/TAP), member 11 (ABCB11), mRNA [NM_003742]	ATP-binding cassette, sub-family B (MDR/TAP), member 11	ref|NM_003742|ens|ENST00000263817|ens|ENST00000618180|ref|XM_006712818	GO:0005215|GO:0005886|GO:0006699|GO:0045177|GO:0042626|GO:0015126|GO:0044281|GO:0055085|GO:0005524|GO:0046581|GO:0016020|GO:0005887|GO:0015721|GO:0008554|GO:0015722|GO:0006810|GO:0015432|GO:0035725|GO:0008206|GO:0016021|GO:0070062	GO:0015126=canalicular bile acid transmembrane transporter activity|GO:0042626=ATPase activity, coupled to transmembrane movement of substances|GO:0015432=bile acid-exporting ATPase activity|GO:0008554=sodium-exporting ATPase activity, phosphorylative mechanism|GO:0005215=transporter activity|GO:0005524=ATP binding	GO:0005886=plasma membrane|GO:0046581=intercellular canaliculus|GO:0005887=integral component of plasma membrane|GO:0070062=extracellular exosome|GO:0045177=apical part of cell|GO:0016020=membrane|GO:0016021=integral component of membrane	GO:0055085=transmembrane transport|GO:0006699=bile acid biosynthetic process|GO:0006810=transport|GO:0008206=bile acid metabolic process|GO:0044281=small molecule metabolic process|GO:0035725=sodium ion transmembrane transport|GO:0015722=canalicular bile acid transport|GO:0015721=bile acid and bile salt transport	THC2479770	ENST00000263817	Hs.658439	8647
ABCB4	0.0321648	Detected	-0.0321648	Detected	0	-0.175918	Detected	0.199599	Detected	0.0118403	0.956091	69.6	65.6	48.9	74.2	NM_018849	ref|Homo sapiens ATP-binding cassette, sub-family B (MDR/TAP), member 4 (ABCB4), transcript variant B, mRNA [NM_018849]	ATP-binding cassette, sub-family B (MDR/TAP), member 4	ref|NM_018849|ref|NM_000443|ref|NM_018850|ens|ENST00000265723	GO:0006629|GO:0005886|GO:0042493|GO:0042626|GO:0042908|GO:0044281|GO:0055085|GO:0005524|GO:0046581|GO:0008559|GO:0016020|GO:0005887|GO:0006855|GO:0006810|GO:0016021|GO:0044255|GO:0070062	GO:0042626=ATPase activity, coupled to transmembrane movement of substances|GO:0008559=xenobiotic-transporting ATPase activity|GO:0005524=ATP binding	GO:0005886=plasma membrane|GO:0046581=intercellular canaliculus|GO:0005887=integral component of plasma membrane|GO:0070062=extracellular exosome|GO:0016020=membrane|GO:0016021=integral component of membrane	GO:0055085=transmembrane transport|GO:0044255=cellular lipid metabolic process|GO:0006810=transport|GO:0044281=small molecule metabolic process|GO:0006855=drug transmembrane transport|GO:0042493=response to drug|GO:0006629=lipid metabolic process|GO:0042908=xenobiotic transport	THC2486286	ENST00000265723	Hs.654403	5244
ABCB5	-0.193695	Compromised	0.193695	Compromised	-2.4e-07	0.0619054	Compromised	0.37761	Compromised	0.219758	0.4719	2.13622	2.75374	2.0698	3.01314	NM_001163993	ref|Homo sapiens ATP-binding cassette, sub-family B (MDR/TAP), member 5 (ABCB5), transcript variant 4, mRNA [NM_001163993]	ATP-binding cassette, sub-family B (MDR/TAP), member 5	ref|NM_001163993|gb|BC110370|tc|THC2693924	GO:0002481|GO:0005886|GO:0015562|GO:0002485|GO:0042626|GO:0055085|GO:0002591|GO:0005524|GO:0030154|GO:0005887|GO:0008152|GO:0042391|GO:0002489|GO:0048058	GO:0042626=ATPase activity, coupled to transmembrane movement of substances|GO:0015562=efflux transmembrane transporter activity|GO:0005524=ATP binding	GO:0005886=plasma membrane|GO:0005887=integral component of plasma membrane	GO:0055085=transmembrane transport|GO:0008152=metabolic process|GO:0002481=antigen processing and presentation of exogenous protein antigen via MHC class Ib, TAP-dependent|GO:0002591=positive regulation of antigen processing and presentation of peptide antigen via MHC class I|GO:0002485=antigen processing and presentation of endogenous peptide antigen via MHC class I via ER pathway, TAP-dependent…	THC2481622	ENST00000258738	Hs.404102	340273
ABCB6	0.0433912	Detected	-0.0433907	Detected	2.39e-07	-0.053658	Detected	-0.0946651	Detected	-0.0741615	0.262293	5970	5540	4530	5150	NM_005689	ref|Homo sapiens ATP-binding cassette, sub-family B (MDR/TAP), member 6 (Langereis blood group) (ABCB6), mRNA [NM_005689]	ATP-binding cassette, sub-family B (MDR/TAP), member 6 (Langereis blood group)	ref|NM_005689|ens|ENST00000443805|ens|ENST00000446716|ens|ENST00000497882	GO:0015886|GO:0015439|GO:0005794|GO:0015562|GO:0005886|GO:0015232|GO:0005783|GO:0005741|GO:0005740|GO:0055085|GO:0005524|GO:0005739|GO:0006879|GO:0006779|GO:0007420|GO:0006810|GO:0043588|GO:0031307|GO:0043190|GO:0070062|GO:0020037|GO:0005768	GO:0015562=efflux transmembrane transporter activity|GO:0015232=heme transporter activity|GO:0020037=heme binding|GO:0005524=ATP binding|GO:0015439=heme-transporting ATPase activity	GO:0005794=Golgi apparatus|GO:0005783=endoplasmic reticulum|GO:0005741=mitochondrial outer membrane|GO:0005740=mitochondrial envelope|GO:0005886=plasma membrane|GO:0031307=integral component of mitochondrial outer membrane|GO:0070062=extracellular exosome|GO:0005768=endosome|GO:0005739=mitochondrion|GO:0043190=ATP-binding cassette (ABC) transporter complex	GO:0055085=transmembrane transport|GO:0007420=brain development|GO:0006810=transport|GO:0043588=skin development|GO:0006879=cellular iron ion homeostasis|GO:0006779=porphyrin-containing compound biosynthetic process|GO:0015886=heme transport	THC2610801	ENST00000443805	Hs.107911	10058
ABCB7	0.0654709	Detected	-0.0654709	Detected	0	-0.0118716	Detected	0.0607183	Detected	0.0244234	0.775203	1300	1170	1000	1230	NM_004299	ref|Homo sapiens ATP-binding cassette, sub-family B (MDR/TAP), member 7 (ABCB7), transcript variant 1, mRNA [NM_004299]	ATP-binding cassette, sub-family B (MDR/TAP), member 7	ref|NM_004299|ref|NM_001271696|ref|NM_001271698|ref|NM_001271699	GO:0006879|GO:0005739|GO:0015886|GO:0015232|GO:0006810|GO:0005743|GO:0042626|GO:0044281|GO:0016021|GO:0055085|GO:0005524	GO:0005524=ATP binding|GO:0042626=ATPase activity, coupled to transmembrane movement of substances|GO:0015232=heme transporter activity	GO:0005739=mitochondrion|GO:0016021=integral component of membrane|GO:0005743=mitochondrial inner membrane	GO:0006879=cellular iron ion homeostasis|GO:0044281=small molecule metabolic process|GO:0055085=transmembrane transport|GO:0006810=transport|GO:0015886=heme transport	THC2632775	ENST00000490858	Hs.370480	22
ABCB8	0.0637233	Detected	-0.0637233	Detected	0	0.0994651	Detected	0.120091	Detected	0.109778	0.231122	117.326	105.85	97.61	115.813	NM_007188	ref|Homo sapiens ATP-binding cassette, sub-family B (MDR/TAP), member 8 (ABCB8), transcript variant 2, mRNA [NM_007188]	ATP-binding cassette, sub-family B (MDR/TAP), member 8	ref|NM_007188|ref|NM_001282291|ref|NM_001282292|ref|NM_001282293	GO:0005215|GO:0005730|GO:0005743|GO:0042626|GO:0005634|GO:0005740|GO:0055085|GO:0005524|GO:0005739|GO:0016020|GO:0008152|GO:0006810|GO:0016021|GO:0043190	GO:0042626=ATPase activity, coupled to transmembrane movement of substances|GO:0005215=transporter activity|GO:0005524=ATP binding	GO:0005730=nucleolus|GO:0005740=mitochondrial envelope|GO:0005743=mitochondrial inner membrane|GO:0005634=nucleus|GO:0005739=mitochondrion|GO:0016020=membrane|GO:0016021=integral component of membrane|GO:0043190=ATP-binding cassette (ABC) transporter complex	GO:0055085=transmembrane transport|GO:0008152=metabolic process|GO:0006810=transport	THC2481609	ENST00000482309	Hs.647118	11194
ABCB9	0.0279038	Detected	-0.0279038	Detected	0	0.0677068	Detected	-0.0055778	Detected	0.0310645	0.569526	73.791	69.9622	61.5636	68.4411	ENST00000537276	ens|ATP-binding cassette, sub-family B (MDR/TAP), member 9 [Source:HGNC Symbol;Acc:HGNC:50] [ENST00000537276]	ATP-binding cassette, sub-family B (MDR/TAP), member 9	ens|ENST00000537276|ens|ENST00000426173|gb|AK027624|gb|AL833963	GO:0005515|GO:0002474|GO:0005783|GO:0030176|GO:0005765|GO:0015031|GO:0055085|GO:0005524|GO:0005764|GO:0042803|GO:0015833|GO:0022891|GO:0008152|GO:0016021|GO:0015440|GO:0005769	GO:0042803=protein homodimerization activity|GO:0015440=peptide-transporting ATPase activity|GO:0005524=ATP binding|GO:0022891=substrate-specific transmembrane transporter activity|GO:0005515=protein binding	GO:0005783=endoplasmic reticulum|GO:0005765=lysosomal membrane|GO:0005764=lysosome|GO:0005769=early endosome|GO:0030176=integral component of endoplasmic reticulum membrane|GO:0016021=integral component of membrane	GO:0055085=transmembrane transport|GO:0015031=protein transport|GO:0008152=metabolic process|GO:0002474=antigen processing and presentation of peptide antigen via MHC class I|GO:0015833=peptide transport	NP1200007	ENST00000542678	Hs.511951	23457
ABCC1	-0.0223081	Detected	0.0223081	Detected	0	0.00270629	Detected	0.0567453	Detected	0.0297258	0.485574	72.9	74.1	60.2	73.1	NM_004996	ref|Homo sapiens ATP-binding cassette, sub-family C (CFTR/MRP), member 1 (ABCC1), mRNA [NM_004996]	ATP-binding cassette, sub-family C (CFTR/MRP), member 1	ref|NM_004996|ens|ENST00000399410|ens|ENST00000621659|ens|ENST00000399408	GO:0019369|GO:0005215|GO:0009235|GO:0005886|GO:0042493|GO:0042626|GO:0006767|GO:0044281|GO:0055085|GO:0005524|GO:0006691|GO:0016020|GO:0005887|GO:0006766|GO:0006810|GO:0016887|GO:0070062	GO:0016887=ATPase activity|GO:0042626=ATPase activity, coupled to transmembrane movement of substances|GO:0005215=transporter activity|GO:0005524=ATP binding	GO:0005886=plasma membrane|GO:0005887=integral component of plasma membrane|GO:0070062=extracellular exosome|GO:0016020=membrane	GO:0055085=transmembrane transport|GO:0006691=leukotriene metabolic process|GO:0009235=cobalamin metabolic process|GO:0006766=vitamin metabolic process|GO:0006810=transport|GO:0044281=small molecule metabolic process|GO:0006767=water-soluble vitamin metabolic process|GO:0042493=response to drug|GO:0019369=arachidonic acid metabolic process	NP236150	ENST00000399410	Hs.391464	4363
ABCC10	0.0549059	Detected	-0.0549059	Detected	0	0.159547	Detected	0.535215	Detected	0.347381	0.217869	50.0632	45.7217	43.6876	66.2977	NM_033450	ref|Homo sapiens ATP-binding cassette, sub-family C (CFTR/MRP), member 10 (ABCC10), transcript variant MRP7A, mRNA [NM_033450]	ATP-binding cassette, sub-family C (CFTR/MRP), member 10	ref|NM_033450|ref|NM_001198934|ens|ENST00000372512|ens|ENST00000244533	GO:0005886|GO:0008152|GO:0042626|GO:0016021|GO:0005765|GO:0055085|GO:0005524	GO:0005524=ATP binding|GO:0042626=ATPase activity, coupled to transmembrane movement of substances	GO:0016021=integral component of membrane|GO:0005886=plasma membrane|GO:0005765=lysosomal membrane	GO:0055085=transmembrane transport|GO:0008152=metabolic process	THC2470630	ENST00000244533	Hs.55879	89845
ABCC11	0.181831	Detected	-0.181831	Detected	0	0.0238361	Detected	0.0603123	Detected	0.0420742	0.839314	67.5	51.7	49.1	58.9	NM_033151	ref|Homo sapiens ATP-binding cassette, sub-family C (CFTR/MRP), member 11 (ABCC11), transcript variant 2, mRNA [NM_033151]	ATP-binding cassette, sub-family C (CFTR/MRP), member 11	ref|NM_033151|ref|NM_032583|ref|NM_145186|ens|ENST00000394747	GO:0005886|GO:0005887|GO:0008152|GO:0015711|GO:0042626|GO:0015216|GO:0008514|GO:0015865|GO:0055085|GO:0005524|GO:0070062	GO:0005524=ATP binding|GO:0042626=ATPase activity, coupled to transmembrane movement of substances|GO:0008514=organic anion transmembrane transporter activity|GO:0015216=purine nucleotide transmembrane transporter activity	GO:0005887=integral component of plasma membrane|GO:0070062=extracellular exosome|GO:0005886=plasma membrane	GO:0055085=transmembrane transport|GO:0008152=metabolic process|GO:0015711=organic anion transport|GO:0015865=purine nucleotide transport	THC2477051	ENST00000394747	Hs.652267	85320
ABCC12	-0.0471139	Compromised	0.0471139	Compromised	0	0.18575	Compromised	0.0363026	Compromised	0.111026	0.335702	1.73	1.82	1.65	1.74	NM_033226	ref|Homo sapiens ATP-binding cassette, sub-family C (CFTR/MRP), member 12 (ABCC12), mRNA [NM_033226]	ATP-binding cassette, sub-family C (CFTR/MRP), member 12	ref|NM_033226|ens|ENST00000497206|ens|ENST00000532494|ens|ENST00000529504	GO:0005739|GO:0008152|GO:0042626|GO:0016021|GO:0055085|GO:0005524	GO:0005524=ATP binding|GO:0042626=ATPase activity, coupled to transmembrane movement of substances	GO:0005739=mitochondrion|GO:0016021=integral component of membrane	GO:0055085=transmembrane transport|GO:0008152=metabolic process	THC2610177	ENST00000497206	Hs.410111	94160
ABCC13	-0.0423546	Compromised	0.0423546	Compromised	0	0.177324	Compromised	-0.0738778	Compromised	0.051723	0.734016	1.91024	1.9964	1.80533	1.77415	NR_003087	ref|Homo sapiens ATP-binding cassette, sub-family C (CFTR/MRP), member 13, pseudogene (ABCC13), transcript variant A, non-coding RNA [NR_003087]	ATP-binding cassette, sub-family C (CFTR/MRP), member 13, pseudogene	ref|NR_003087|ens|ENST00000467409|gb|AY063514|tc|THC2479122	GO:0042626|GO:0016021|GO:0055085|GO:0005524	GO:0005524=ATP binding|GO:0042626=ATPase activity, coupled to transmembrane movement of substances	GO:0016021=integral component of membrane	GO:0055085=transmembrane transport	THC2479122	ENST00000467409	Hs.366575	150000
ABCC2	0.830428	Detected	-0.830428	Compromised	1.25e-07	0.654755	Detected	-0.44044	Compromised	0.107158	0.924046	12.4	3.86469	8.91	4.87803	ENST00000370434	ens|ATP-binding cassette, sub-family C (CFTR/MRP), member 2 [Source:HGNC Symbol;Acc:HGNC:53] [ENST00000370434]	ATP-binding cassette, sub-family C (CFTR/MRP), member 2	ens|ENST00000370434|gb|U66683|tc|THC2720169	GO:0005515|GO:0046685|GO:0043627|GO:0005886|GO:0009408|GO:0009986|GO:0031427|GO:0019904|GO:0042626|GO:0070327|GO:0055085|GO:0005524|GO:0046581|GO:0016324|GO:0030644|GO:0015732|GO:0005887|GO:0006855|GO:0008152|GO:0006810|GO:0008514|GO:0006979	GO:0019904=protein domain specific binding|GO:0042626=ATPase activity, coupled to transmembrane movement of substances|GO:0008514=organic anion transmembrane transporter activity|GO:0005524=ATP binding|GO:0005515=protein binding	GO:0005886=plasma membrane|GO:0009986=cell surface|GO:0046581=intercellular canaliculus|GO:0005887=integral component of plasma membrane|GO:0016324=apical plasma membrane	GO:0043627=response to estrogen|GO:0055085=transmembrane transport|GO:0008152=metabolic process|GO:0006810=transport|GO:0006979=response to oxidative stress|GO:0009408=response to heat|GO:0006855=drug transmembrane transport|GO:0031427=response to methotrexate|GO:0046685=response to arsenic-containing substance|GO:0030644=cellular chloride ion homeostasis|GO:0070327=thyroid hormone transport|GO:0…	THC2472036	ENST00000370449	Hs.368243	1244
ABCC3	0.0196531	Detected	-0.0196531	Detected	0	-0.356975	Detected	-0.306377	Detected	-0.331676	0.00920055	544.25	521.946	340.221	412.141	NM_001144070	ref|Homo sapiens ATP-binding cassette, sub-family C (CFTR/MRP), member 3 (ABCC3), transcript variant 2, mRNA [NM_001144070]	ATP-binding cassette, sub-family C (CFTR/MRP), member 3	ref|NM_001144070|ens|ENST00000427699|gb|BC046126|gb|BC050370	GO:0016020|GO:0005886|GO:0005887|GO:0015721|GO:0006810|GO:0042626|GO:0008514|GO:0008206|GO:0044281|GO:0055085|GO:0005524	GO:0005524=ATP binding|GO:0042626=ATPase activity, coupled to transmembrane movement of substances|GO:0008514=organic anion transmembrane transporter activity	GO:0005887=integral component of plasma membrane|GO:0016020=membrane|GO:0005886=plasma membrane	GO:0044281=small molecule metabolic process|GO:0055085=transmembrane transport|GO:0006810=transport|GO:0008206=bile acid metabolic process|GO:0015721=bile acid and bile salt transport	THC2482842	ENST00000503337	Hs.463421	8714
ABCC4	-0.245029	Compromised	0.245029	Compromised	-2.35e-07	-0.8502	Compromised	-0.483086	Compromised	-0.666643	0.161358	3.28	4.54	1.75	2.64	NM_005845	ref|Homo sapiens ATP-binding cassette, sub-family C (CFTR/MRP), member 4 (ABCC4), transcript variant 1, mRNA [NM_005845]	ATP-binding cassette, sub-family C (CFTR/MRP), member 4	ref|NM_005845|ref|NM_001105515|ref|NM_001301830|ref|NM_001301829	GO:0014070|GO:0031088|GO:0005886|GO:0042493|GO:0042626|GO:0010243|GO:0030168|GO:0055085|GO:0048661|GO:0005524|GO:0008150|GO:0016323|GO:0016020|GO:0007596|GO:0002576|GO:0016021|GO:0055114|GO:0016404	GO:0016404=15-hydroxyprostaglandin dehydrogenase (NAD+) activity|GO:0042626=ATPase activity, coupled to transmembrane movement of substances|GO:0005524=ATP binding	GO:0005886=plasma membrane|GO:0016020=membrane|GO:0016021=integral component of membrane|GO:0031088=platelet dense granule membrane|GO:0016323=basolateral plasma membrane	GO:0008150=biological_process|GO:0055085=transmembrane transport|GO:0014070=response to organic cyclic compound|GO:0007596=blood coagulation|GO:0048661=positive regulation of smooth muscle cell proliferation|GO:0002576=platelet degranulation|GO:0042493=response to drug|GO:0055114=oxidation-reduction process|GO:0010243=response to organonitrogen compound|GO:0030168=platelet activation	NP650495	ENST00000376887	Hs.508423	10257
ABCC5	0.0334179	Detected	-0.0334179	Detected	0	-0.202548	Detected	-0.124035	Detected	-0.163292	0.0868842	615.102	578.745	423.89	523.529	NM_005688	ref|Homo sapiens ATP-binding cassette, sub-family C (CFTR/MRP), member 5 (ABCC5), transcript variant 1, mRNA [NM_005688]	ATP-binding cassette, sub-family C (CFTR/MRP), member 5	ref|NM_005688|ens|ENST00000437205|ens|ENST00000265586|ens|ENST00000334444	GO:0005886|GO:0005975|GO:0042626|GO:0044281|GO:0055085|GO:0005524|GO:0016020|GO:0005887|GO:0006810|GO:0009405|GO:0015711|GO:0030213|GO:0030212|GO:0008514|GO:0030203	GO:0042626=ATPase activity, coupled to transmembrane movement of substances|GO:0008514=organic anion transmembrane transporter activity|GO:0005524=ATP binding	GO:0005886=plasma membrane|GO:0005887=integral component of plasma membrane|GO:0016020=membrane	GO:0055085=transmembrane transport|GO:0006810=transport|GO:0009405=pathogenesis|GO:0044281=small molecule metabolic process|GO:0005975=carbohydrate metabolic process|GO:0030213=hyaluronan biosynthetic process|GO:0030212=hyaluronan metabolic process|GO:0015711=organic anion transport|GO:0030203=glycosaminoglycan metabolic process	NP086323	ENST00000437205	Hs.743953	10057
ABCC5-AS1	0.0399339	Detected	-0.0399339	Detected	0	-0.195925	Detected	-0.175555	Detected	-0.18574	0.0458705	148	138	102	121	NR_046570	ref|Homo sapiens ABCC5 antisense RNA 1 (ABCC5-AS1), long non-coding RNA [NR_046570]	ABCC5 antisense RNA 1	ref|NR_046570|linc|lnc-HTR3D-1:1|tc|THC2649410					THC2649410		Hs.570696	100873982
ABCC6	0.0349755	Detected	-0.0349755	Detected	0	0.945972	Detected	-0.0159006	Detected	0.465036	0.436601	82.9512	77.8798	126.59	76.015	NM_001079528	ref|Homo sapiens ATP-binding cassette, sub-family C (CFTR/MRP), member 6 (ABCC6), transcript variant 2, mRNA [NM_001079528]	ATP-binding cassette, sub-family C (CFTR/MRP), member 6	ref|NM_001079528|ens|ENST00000565118|gb|BC050733|tc|THC2474680	GO:0005215|GO:0005886|GO:0006200|GO:0042493|GO:0042626|GO:0005634|GO:0055085|GO:0005524|GO:0016328|GO:0016323|GO:0016324|GO:0005789|GO:0006810|GO:0016021|GO:0007601	GO:0042626=ATPase activity, coupled to transmembrane movement of substances|GO:0005215=transporter activity|GO:0005524=ATP binding	GO:0016328=lateral plasma membrane|GO:0005886=plasma membrane|GO:0005789=endoplasmic reticulum membrane|GO:0005634=nucleus|GO:0016021=integral component of membrane|GO:0016323=basolateral plasma membrane|GO:0016324=apical plasma membrane	GO:0055085=transmembrane transport|GO:0007601=visual perception|GO:0006810=transport|GO:0042493=response to drug	THC2480873	ENST00000576204	Hs.442182	368
ABCC6P1	-0.00756526	Compromised	0.0075655	Compromised	1.192e-07	-1.29136	Compromised	-0.418779	Compromised	-0.855068	0.189118	9.75	9.71	3.25	6.96	NR_003569	ref|Homo sapiens ATP-binding cassette, sub-family C, member 6 pseudogene 1 (functional) (ABCC6P1), non-coding RNA [NR_003569]	ATP-binding cassette, sub-family C, member 6 pseudogene 1 (functional)	ref|NR_003569|ens|ENST00000546162|gb|BC075833|tc|THC2606670					THC2606670	ENST00000546162	Hs.13188	653190
ABCC8	-0.134495	Detected	0.134495	Detected	0	-0.22353	Detected	-0.278033	Detected	-0.250782	0.209147	38.4	45.6	29.3	33	NM_000352	ref|Homo sapiens ATP-binding cassette, sub-family C (CFTR/MRP), member 8 (ABCC8), transcript variant 2, mRNA [NM_000352]	ATP-binding cassette, sub-family C (CFTR/MRP), member 8	ref|NM_000352|ref|NM_001287174|ens|ENST00000525022|ens|ENST00000526168	GO:0015079|GO:0005886|GO:0005975|GO:0008281|GO:0007268|GO:0042626|GO:0044281|GO:0055085|GO:0005524|GO:0044325|GO:0007165|GO:0006112|GO:0050796|GO:0008076|GO:0006813|GO:0071805	GO:0008281=sulfonylurea receptor activity|GO:0042626=ATPase activity, coupled to transmembrane movement of substances|GO:0015079=potassium ion transmembrane transporter activity|GO:0044325=ion channel binding|GO:0005524=ATP binding	GO:0008076=voltage-gated potassium channel complex|GO:0005886=plasma membrane	GO:0055085=transmembrane transport|GO:0071805=potassium ion transmembrane transport|GO:0007165=signal transduction|GO:0006112=energy reserve metabolic process|GO:0007268=synaptic transmission|GO:0044281=small molecule metabolic process|GO:0006813=potassium ion transport|GO:0005975=carbohydrate metabolic process|GO:0050796=regulation of insulin secretion	THC2461348	ENST00000525022	Hs.54470	6833
ABCC9	-0.0524473	Compromised	0.0524473	Compromised	0	0.203413	Compromised	-0.00959063	Compromised	0.096911	0.500076	1.7638	1.86933	1.70927	1.72482	NM_005691	ref|Homo sapiens ATP-binding cassette, sub-family C (CFTR/MRP), member 9 (ABCC9), transcript variant SUR2A, mRNA [NM_005691]	ATP-binding cassette, sub-family C (CFTR/MRP), member 9	ref|NM_005691|ref|NM_020297|ens|ENST00000621589|ens|ENST00000261201	GO:0005215|GO:0005886|GO:0008282|GO:0008281|GO:0042626|GO:0005267|GO:0007268|GO:0010107|GO:0015459|GO:0055085|GO:0030017|GO:0005524|GO:0044325|GO:0042383|GO:0007165|GO:0051607|GO:0008076|GO:0008152|GO:0006813	GO:0008281=sulfonylurea receptor activity|GO:0042626=ATPase activity, coupled to transmembrane movement of substances|GO:0005267=potassium channel activity|GO:0044325=ion channel binding|GO:0005215=transporter activity|GO:0005524=ATP binding|GO:0015459=potassium channel regulator activity	GO:0008282=ATP-sensitive potassium channel complex|GO:0008076=voltage-gated potassium channel complex|GO:0005886=plasma membrane|GO:0042383=sarcolemma|GO:0030017=sarcomere	GO:0055085=transmembrane transport|GO:0007165=signal transduction|GO:0008152=metabolic process|GO:0007268=synaptic transmission|GO:0006813=potassium ion transport|GO:0051607=defense response to virus|GO:0010107=potassium ion import	NP274082	ENST00000261201	Hs.732701	10060
ABCD1	0.060442	Detected	-0.060442	Detected	0	-0.0545445	Detected	-0.0333357	Detected	-0.0439401	0.548282	36.0861	32.7047	27.0436	32.0998	NM_000033	ref|Homo sapiens ATP-binding cassette, sub-family D (ALD), member 1 (ABCD1), mRNA [NM_000033]	ATP-binding cassette, sub-family D (ALD), member 1	ref|NM_000033|ens|ENST00000429313|ens|ENST00000218104|ens|ENST00000399687	GO:0005515|GO:0005215|GO:0048471|GO:0042626|GO:0044281|GO:0042803|GO:0005829|GO:0042802|GO:0015910|GO:0005739|GO:0005737|GO:0007031|GO:0015919|GO:0005779|GO:0016887|GO:0044255|GO:0005778|GO:0042760|GO:0005777|GO:0006635|GO:0005325|GO:0036109|GO:0055085|GO:0005524|GO:0043651|GO:0033559|GO:0016020|GO:0042758|GO:0033540|GO:0019899	GO:0016887=ATPase activity|GO:0005215=transporter activity|GO:0005524=ATP binding|GO:0042626=ATPase activity, coupled to transmembrane movement of substances|GO:0042802=identical protein binding|GO:0042803=protein homodimerization activity|GO:0005325=peroxisomal fatty-acyl-CoA transporter activity|GO:0005515=protein binding|GO:0019899=enzyme binding	GO:0005829=cytosol|GO:0005778=peroxisomal membrane|GO:0005777=peroxisome|GO:0048471=perinuclear region of cytoplasm|GO:0005779=integral component of peroxisomal membrane|GO:0005737=cytoplasm|GO:0005739=mitochondrion|GO:0016020=membrane	GO:0042758=long-chain fatty acid catabolic process|GO:0033540=fatty acid beta-oxidation using acyl-CoA oxidase|GO:0007031=peroxisome organization|GO:0044255=cellular lipid metabolic process|GO:0044281=small molecule metabolic process|GO:0006635=fatty acid beta-oxidation|GO:0036109=alpha-linolenic acid metabolic process|GO:0033559=unsaturated fatty acid metabolic process|GO:0055085=transmembrane t…	THC2462247	ENST00000218104	Hs.159546	215
ABCD2	-0.0637255	Compromised	0.063725	Compromised	-2.375e-07	0.184977	Compromised	0.273183	Compromised	0.22908	0.0979259	1.96	2.11	1.89	2.35	NM_005164	ref|Homo sapiens ATP-binding cassette, sub-family D (ALD), member 2 (ABCD2), mRNA [NM_005164]	ATP-binding cassette, sub-family D (ALD), member 2	ref|NM_005164|gb|AJ000327|tc|THC2476335	GO:0005515|GO:0000038|GO:0006635|GO:0042626|GO:0055085|GO:0005524|GO:0042803|GO:0043231|GO:0005829|GO:0005739|GO:0032000|GO:0016021|GO:0005778|GO:0042760|GO:0005777	GO:0042626=ATPase activity, coupled to transmembrane movement of substances|GO:0042803=protein homodimerization activity|GO:0005524=ATP binding|GO:0005515=protein binding	GO:0005778=peroxisomal membrane|GO:0005777=peroxisome|GO:0043231=intracellular membrane-bounded organelle|GO:0005739=mitochondrion|GO:0016021=integral component of membrane|GO:0005829=cytosol	GO:0055085=transmembrane transport|GO:0032000=positive regulation of fatty acid beta-oxidation|GO:0042760=very long-chain fatty acid catabolic process|GO:0000038=very long-chain fatty acid metabolic process|GO:0006635=fatty acid beta-oxidation	THC2476335	ENST00000308666	Hs.117852	225
ABCD3	-0.0404108	Detected	0.0404108	Detected	0	-0.351142	Detected	-0.15891	Detected	-0.255026	0.13429	102.497	106.832	67.0671	89.6253	NM_001122674	ref|Homo sapiens ATP-binding cassette, sub-family D (ALD), member 3 (ABCD3), transcript variant 2, mRNA [NM_001122674]	ATP-binding cassette, sub-family D (ALD), member 3	ref|NM_001122674|ens|ENST00000315713|gb|BC009712|tc|THC2486920	GO:0005515|GO:0006635|GO:0005782|GO:0005743|GO:0042626|GO:0055085|GO:0005524|GO:0042803|GO:0043231|GO:0005829|GO:0016020|GO:0007031|GO:0016021|GO:0016887|GO:0042760|GO:0005778|GO:0005777	GO:0016887=ATPase activity|GO:0042626=ATPase activity, coupled to transmembrane movement of substances|GO:0042803=protein homodimerization activity|GO:0005524=ATP binding|GO:0005515=protein binding	GO:0005782=peroxisomal matrix|GO:0005743=mitochondrial inner membrane|GO:0005778=peroxisomal membrane|GO:0005777=peroxisome|GO:0043231=intracellular membrane-bounded organelle|GO:0016020=membrane|GO:0016021=integral component of membrane|GO:0005829=cytosol	GO:0055085=transmembrane transport|GO:0007031=peroxisome organization|GO:0042760=very long-chain fatty acid catabolic process|GO:0006635=fatty acid beta-oxidation	THC2486920	ENST00000315713	Hs.700576	5825
ABCD4	-1.37723	Detected	1.37723	Detected	0	1.2274	Detected	1.17458	Detected	1.20099	0.475211	68.2685	454	337	380	AK125109	gb|Homo sapiens cDNA FLJ43119 fis, clone CTONG3003179. [AK125109]	ATP-binding cassette, sub-family D (ALD), member 4	gb|AK125109|tc|THC2523786	GO:0009235|GO:0006767|GO:0042626|GO:0044281|GO:0005765|GO:0005524|GO:0055085|GO:0006766|GO:0005789|GO:0016021|GO:0043190|GO:0005778|GO:0005777	GO:0042626=ATPase activity, coupled to transmembrane movement of substances|GO:0005524=ATP binding	GO:0005765=lysosomal membrane|GO:0005789=endoplasmic reticulum membrane|GO:0005778=peroxisomal membrane|GO:0005777=peroxisome|GO:0016021=integral component of membrane|GO:0043190=ATP-binding cassette (ABC) transporter complex	GO:0055085=transmembrane transport|GO:0009235=cobalamin metabolic process|GO:0006766=vitamin metabolic process|GO:0044281=small molecule metabolic process|GO:0006767=water-soluble vitamin metabolic process	THC2548714	ENST00000484380		5826
ABCE1	-0.0308664	Detected	0.0308664	Detected	0	-0.321391	Detected	-0.292472	Detected	-0.306932	0.012109	943.864	970.852	626.313	747.396	NM_002940	ref|Homo sapiens ATP-binding cassette, sub-family E (OABP), member 1 (ABCE1), transcript variant 1, mRNA [NM_002940]	ATP-binding cassette, sub-family E (OABP), member 1	ref|NM_002940|ref|NM_001040876|ens|ENST00000296577|gb|BC016988	GO:0005739|GO:0005737|GO:0051536|GO:0016020|GO:0008428|GO:0016032|GO:0009615|GO:0043086|GO:0016887|GO:0005524|GO:0006401	GO:0016887=ATPase activity|GO:0005524=ATP binding|GO:0008428=ribonuclease inhibitor activity|GO:0051536=iron-sulfur cluster binding	GO:0005737=cytoplasm|GO:0005739=mitochondrion|GO:0016020=membrane	GO:0043086=negative regulation of catalytic activity|GO:0016032=viral process|GO:0009615=response to virus|GO:0006401=RNA catabolic process	THC2469886	ENST00000296577	Hs.12013	6059
ABCF1	-0.0429974	Detected	0.0429969	Detected	-2.385e-07	0.134987	Detected	0.294524	Detected	0.214756	0.141275	3910	4090	3590	4690	NM_001025091	ref|Homo sapiens ATP-binding cassette, sub-family F (GCN20), member 1 (ABCF1), transcript variant 1, mRNA [NM_001025091]	ATP-binding cassette, sub-family F (GCN20), member 1	ref|NM_001025091|ref|NM_001090|ens|ENST00000376545|ens|ENST00000383588	GO:0005515|GO:0042254|GO:0045727|GO:0008494|GO:0005635|GO:0005524|GO:0006412|GO:0006413|GO:0005737|GO:0006954|GO:0016020|GO:0042788|GO:0043022|GO:0005840|GO:0005654|GO:0016887|GO:0008135	GO:0016887=ATPase activity|GO:0008494=translation activator activity|GO:0008135=translation factor activity, RNA binding|GO:0005524=ATP binding|GO:0005515=protein binding|GO:0043022=ribosome binding	GO:0005840=ribosome|GO:0042788=polysomal ribosome|GO:0005654=nucleoplasm|GO:0005635=nuclear envelope|GO:0005737=cytoplasm|GO:0016020=membrane	GO:0045727=positive regulation of translation|GO:0042254=ribosome biogenesis|GO:0006413=translational initiation|GO:0006412=translation|GO:0006954=inflammatory response	NP1176940	ENST00000376545	Hs.655285	23
ABCF2	-0.0570853	Detected	0.0570853	Detected	0	0.189637	Detected	0.207987	Detected	0.198812	0.075163	1350	1440	1300	1540	NM_005692	ref|Homo sapiens ATP-binding cassette, sub-family F (GCN20), member 2 (ABCF2), transcript variant 2, mRNA [NM_005692]	ATP-binding cassette, sub-family F (GCN20), member 2	ref|NM_005692|ens|ENST00000222388|ens|ENST00000465687|ref|XM_005249931	GO:0005215|GO:0016020|GO:0008152|GO:0006810|GO:0005740|GO:0043190|GO:0016887|GO:0005524	GO:0016887=ATPase activity|GO:0005524=ATP binding|GO:0005215=transporter activity	GO:0016020=membrane|GO:0005740=mitochondrial envelope|GO:0043190=ATP-binding cassette (ABC) transporter complex	GO:0008152=metabolic process|GO:0006810=transport	THC2619700	ENST00000222388	Hs.654958	10061
ABCF3	-0.0376759	Detected	0.0376754	Detected	-2.39e-07	0.288805	Detected	0.315279	Detected	0.302042	0.0170344	3390	3520	3450	4110	NM_018358	ref|Homo sapiens ATP-binding cassette, sub-family F (GCN20), member 3 (ABCF3), mRNA [NM_018358]	ATP-binding cassette, sub-family F (GCN20), member 3	ref|NM_018358|ens|ENST00000468892|ens|ENST00000292808|ens|ENST00000466742	GO:0051607|GO:0016020|GO:0008152|GO:0016887|GO:0005524	GO:0016887=ATPase activity|GO:0005524=ATP binding	GO:0016020=membrane	GO:0008152=metabolic process|GO:0051607=defense response to virus	THC2763523	ENST00000468892	Hs.361323	55324
ABCG1	-0.00323224	Detected	0.00323224	Detected	0	0.208052	Detected	0.203639	Detected	0.205846	0.000361248	596	590	560	653	NM_207627	ref|Homo sapiens ATP-binding cassette, sub-family G (WHITE), member 1 (ABCG1), transcript variant 5, mRNA [NM_207627]	ATP-binding cassette, sub-family G (WHITE), member 1	ref|NM_207627|ref|NM_207628|ref|NM_004915|ref|NM_207174	GO:0005515|GO:0019534|GO:0005886|GO:0033993|GO:0017127|GO:0010872|GO:0044281|GO:0042803|GO:0010875|GO:0043231|GO:0005739|GO:0005543|GO:0015485|GO:0046983|GO:0009720|GO:0008203|GO:0042987|GO:0042632|GO:0033344|GO:0006355|GO:0005794|GO:0010033|GO:0046982|GO:0010745|GO:0043691|GO:0005548|GO:0055085|GO:0005524|GO:0010887|GO:0055099|GO:0033700|GO:0043531|GO:0034374|GO:0000139|GO:0005887|GO:0034041|GO:…	GO:0005524=ATP binding|GO:0005548=phospholipid transporter activity|GO:0046982=protein heterodimerization activity|GO:0017127=cholesterol transporter activity|GO:0034041=sterol-transporting ATPase activity|GO:0042803=protein homodimerization activity|GO:0015485=cholesterol binding|GO:0046983=protein dimerization activity|GO:0043531=ADP binding|GO:0005543=phospholipid binding|GO:0005515=protein bi…	GO:0009897=external side of plasma membrane|GO:0005794=Golgi apparatus|GO:0000139=Golgi membrane|GO:0005654=nucleoplasm|GO:0005789=endoplasmic reticulum membrane|GO:0005887=integral component of plasma membrane|GO:0005768=endosome|GO:0043231=intracellular membrane-bounded organelle|GO:0005886=plasma membrane|GO:0005739=mitochondrion|GO:0055037=recycling endosome	GO:0034375=high-density lipoprotein particle remodeling|GO:0055099=response to high density lipoprotein particle|GO:0034374=low-density lipoprotein particle remodeling|GO:0008203=cholesterol metabolic process|GO:0045542=positive regulation of cholesterol biosynthetic process|GO:0042157=lipoprotein metabolic process|GO:0042632=cholesterol homeostasis|GO:0055091=phospholipid homeostasis|GO:0044281=…	THC2463214	ENST00000398437	Hs.124649	9619
ABCG2	0.51816	Compromised	-0.51816	Compromised	0	-1.33975	Compromised	0.96688	Detected	-0.186434	0.896298	7.95	3.82	1.78	10.3	NM_004827	ref|Homo sapiens ATP-binding cassette, sub-family G (WHITE), member 2 (Junior blood group) (ABCG2), transcript variant 1, mRNA [NM_004827]	ATP-binding cassette, sub-family G (WHITE), member 2 (Junior blood group)	ref|NM_004827|ref|NM_001257386|ens|ENST00000237612|ens|ENST00000515655	GO:0005515|GO:0005215|GO:0015886|GO:0031966|GO:0005886|GO:0015232|GO:0042493|GO:0042626|GO:0042908|GO:0005634|GO:0044281|GO:0046415|GO:0055085|GO:0005524|GO:0042803|GO:0006879|GO:0008559|GO:0006855|GO:0006810|GO:0005654|GO:0016021	GO:0042626=ATPase activity, coupled to transmembrane movement of substances|GO:0042803=protein homodimerization activity|GO:0015232=heme transporter activity|GO:0008559=xenobiotic-transporting ATPase activity|GO:0005215=transporter activity|GO:0005524=ATP binding|GO:0005515=protein binding	GO:0005886=plasma membrane|GO:0005654=nucleoplasm|GO:0005634=nucleus|GO:0031966=mitochondrial membrane|GO:0016021=integral component of membrane	GO:0055085=transmembrane transport|GO:0006810=transport|GO:0046415=urate metabolic process|GO:0044281=small molecule metabolic process|GO:0006879=cellular iron ion homeostasis|GO:0006855=drug transmembrane transport|GO:0042493=response to drug|GO:0042908=xenobiotic transport|GO:0015886=heme transport	THC2478592	ENST00000237612	Hs.480218	9429
ABCG4	0.030997	Detected	-0.030997	Detected	0	-0.262412	Detected	-0.494587	Detected	-0.378499	0.0877176	14.3	13.5	9.47	9.43	NM_022169	ref|Homo sapiens ATP-binding cassette, sub-family G (WHITE), member 4 (ABCG4), transcript variant 1, mRNA [NM_022169]	ATP-binding cassette, sub-family G (WHITE), member 4	ref|NM_022169|ref|NM_001142505|ens|ENST00000619701|gb|AJ308237	GO:0005515|GO:0033344|GO:0046982|GO:0005886|GO:0017127|GO:0008152|GO:0016021|GO:0055085|GO:0016887|GO:0005524|GO:0042803	GO:0016887=ATPase activity|GO:0005524=ATP binding|GO:0005515=protein binding|GO:0042803=protein homodimerization activity|GO:0046982=protein heterodimerization activity|GO:0017127=cholesterol transporter activity	GO:0016021=integral component of membrane|GO:0005886=plasma membrane	GO:0055085=transmembrane transport|GO:0008152=metabolic process|GO:0033344=cholesterol efflux	THC2474895	ENST00000619701	Hs.126378	64137
ABCG5	0.0780659	Compromised	-0.0780659	Compromised	0	-0.330599	Compromised	0.30879	Compromised	-0.0109043	0.976576	5.97	5.28	3.65	6.65	NM_022436	ref|Homo sapiens ATP-binding cassette, sub-family G (WHITE), member 5 (ABCG5), mRNA [NM_022436]	ATP-binding cassette, sub-family G (WHITE), member 5	ref|NM_022436|ens|ENST00000409962|ens|ENST00000486512|ens|ENST00000260645	GO:0042632|GO:0005515|GO:0007588|GO:0033344|GO:0046982|GO:0005886|GO:0007584|GO:0042493|GO:0017127|GO:0044281|GO:0055085|GO:0045796|GO:0005524|GO:0043235|GO:0030299|GO:0016324|GO:0010212|GO:0010949|GO:0015918|GO:0043190|GO:0016887	GO:0016887=ATPase activity|GO:0005524=ATP binding|GO:0005515=protein binding|GO:0046982=protein heterodimerization activity|GO:0017127=cholesterol transporter activity	GO:0043235=receptor complex|GO:0005886=plasma membrane|GO:0016324=apical plasma membrane|GO:0043190=ATP-binding cassette (ABC) transporter complex	GO:0055085=transmembrane transport|GO:0007584=response to nutrient|GO:0045796=negative regulation of intestinal cholesterol absorption|GO:0042632=cholesterol homeostasis|GO:0007588=excretion|GO:0044281=small molecule metabolic process|GO:0010949=negative regulation of intestinal phytosterol absorption|GO:0015918=sterol transport|GO:0042493=response to drug|GO:0033344=cholesterol efflux|GO:0030299…	NP1147378	ENST00000409962	Hs.132992	64240
ABCG8	-0.0479145	Compromised	0.0479145	Compromised	0	0.1744	Compromised	-0.0679703	Compromised	0.0532148	0.72258	1.88	1.98	1.78	1.76	NM_022437	ref|Homo sapiens ATP-binding cassette, sub-family G (WHITE), member 8 (ABCG8), mRNA [NM_022437]	ATP-binding cassette, sub-family G (WHITE), member 8	ref|NM_022437|ens|ENST00000272286|ref|XM_006712075|ref|XM_005264483	GO:0042632|GO:0005515|GO:0007588|GO:0033344|GO:0046982|GO:0005886|GO:0007584|GO:0042493|GO:0017127|GO:0044281|GO:0055085|GO:0045796|GO:0005524|GO:0043235|GO:0030299|GO:0016324|GO:0015914|GO:0010949|GO:0015918|GO:0043190|GO:0016887	GO:0016887=ATPase activity|GO:0005524=ATP binding|GO:0005515=protein binding|GO:0046982=protein heterodimerization activity|GO:0017127=cholesterol transporter activity	GO:0043235=receptor complex|GO:0005886=plasma membrane|GO:0016324=apical plasma membrane|GO:0043190=ATP-binding cassette (ABC) transporter complex	GO:0055085=transmembrane transport|GO:0007584=response to nutrient|GO:0045796=negative regulation of intestinal cholesterol absorption|GO:0042632=cholesterol homeostasis|GO:0007588=excretion|GO:0044281=small molecule metabolic process|GO:0010949=negative regulation of intestinal phytosterol absorption|GO:0015918=sterol transport|GO:0042493=response to drug|GO:0015914=phospholipid transport|GO:003…	THC2481118	ENST00000272286	Hs.413931	64241
ABHD1	-0.107854	Detected	0.107854	Detected	0	-0.00391722	Detected	-0.215357	Detected	-0.109637	0.543332	90	103	78.5	79.3	NM_032604	ref|Homo sapiens abhydrolase domain containing 1 (ABHD1), mRNA [NM_032604]	abhydrolase domain containing 1	ref|NM_032604|ens|ENST00000489120|ens|ENST00000316470|ens|ENST00000448950	GO:0052689|GO:0008150|GO:0003674|GO:0008152|GO:0016021	GO:0052689=carboxylic ester hydrolase activity|GO:0003674=molecular_function	GO:0016021=integral component of membrane	GO:0008150=biological_process|GO:0008152=metabolic process	THC2487978	ENST00000489120	Hs.375791	84696
ABHD10	-0.0501752	Compromised	0.0501752	Compromised	0	0.175706	Compromised	-0.00805139	Compromised	0.0838275	0.507286	1.77	1.87	1.68	1.73	NM_018394	ref|Homo sapiens abhydrolase domain containing 10 (ABHD10), transcript variant 1, mRNA [NM_018394]	abhydrolase domain containing 10	ref|NM_018394|ref|NM_001272069|ref|NR_073570|ref|NR_073571	GO:0005739|GO:0019391|GO:0004553|GO:0005829	GO:0004553=hydrolase activity, hydrolyzing O-glycosyl compounds	GO:0005739=mitochondrion|GO:0005829=cytosol	GO:0019391=glucuronoside catabolic process	THC2467493	ENST00000273359	Hs.477115	55347
ABHD11	-0.0280314	Detected	0.0280318	Detected	2.38e-07	0.0111222	Detected	-0.0120101	Detected	-0.000443935	0.989643	3818.6	3912.38	3184.41	3665.38	NM_001301058	ref|Homo sapiens abhydrolase domain containing 11 (ABHD11), transcript variant 9, mRNA [NM_001301058]	abhydrolase domain containing 11	ref|NM_001301058|ref|NM_001145364|ref|NM_148912|ref|NM_148913	GO:0005739|GO:0008150|GO:0003674|GO:0016787|GO:0008152|GO:0005575	GO:0003674=molecular_function|GO:0016787=hydrolase activity	GO:0005739=mitochondrion|GO:0005575=cellular_component	GO:0008150=biological_process|GO:0008152=metabolic process	THC2483689	ENST00000497897	Hs.647045	83451
ABHD11-AS1	-0.254055	Detected	0.254055	Detected	-1.2e-07	0.0918531	Detected	-0.0696063	Detected	0.0111234	0.970507	12.7	17.8	13.1	13.7	NR_026690	ref|Homo sapiens ABHD11 antisense RNA 1 (tail to tail) (ABHD11-AS1), long non-coding RNA [NR_026690]	ABHD11 antisense RNA 1 (tail to tail)	ref|NR_026690|linc|lnc-WBSCR22-1:1|gb|BU595969							Hs.650513	171022
ABHD12	-0.0898087	Detected	0.0898087	Detected	0	-0.120794	Detected	0.09431	Detected	-0.013242	0.933323	637	711	506	687	NM_015600	ref|Homo sapiens abhydrolase domain containing 12 (ABHD12), transcript variant 2, mRNA [NM_015600]	abhydrolase domain containing 12	ref|NM_015600|ref|NM_001042472|ens|ENST00000481556|ens|ENST00000376542	GO:0006660|GO:0010996|GO:0032281|GO:0047372|GO:0007628	GO:0047372=acylglycerol lipase activity	GO:0032281=AMPA glutamate receptor complex	GO:0007628=adult walking behavior|GO:0010996=response to auditory stimulus|GO:0006660=phosphatidylserine catabolic process	THC2526851	ENST00000481556	Hs.441550	26090
ABHD12B	-0.0114126	Compromised	0.0114121	Compromised	-2.385e-07	0.480472	Compromised	0.133843	Compromised	0.307158	0.219017	1.80776	1.80997	2.06325	1.89784	NM_001206673	ref|Homo sapiens abhydrolase domain containing 12B (ABHD12B), transcript variant 1, mRNA [NM_001206673]	abhydrolase domain containing 12B	ref|NM_001206673|ref|NM_181814|ens|ENST00000382029|ens|ENST00000557345	GO:0016787|GO:0008152	GO:0016787=hydrolase activity		GO:0008152=metabolic process	NP820221	ENST00000554566	Hs.271896	145447
ABHD13	0.054424	Detected	-0.054424	Detected	0	0.0486157	Detected	-0.455437	Compromised	-0.203411	0.512828	10.8	9.87	8.73	7.2	NM_032859	ref|Homo sapiens abhydrolase domain containing 13 (ABHD13), mRNA [NM_032859]	abhydrolase domain containing 13	ref|NM_032859|ens|ENST00000375898|gb|BX647428|gb|BC018608	GO:0016787|GO:0016020|GO:0008152|GO:0016021	GO:0016787=hydrolase activity	GO:0016020=membrane|GO:0016021=integral component of membrane	GO:0008152=metabolic process	THC2601478	ENST00000375898	Hs.183528	84945
ABHD14A	0.0133669	Detected	-0.0133669	Detected	0	-0.117395	Detected	-0.211271	Detected	-0.164333	0.0780175	553.231	535.203	410.093	449.444	NM_015407	ref|Homo sapiens abhydrolase domain containing 14A (ABHD14A), mRNA [NM_015407]	abhydrolase domain containing 14A	ref|NM_015407|ens|ENST00000273596|ens|ENST00000458031|gb|BC002571	GO:0005737|GO:0016787|GO:0008152|GO:0016021|GO:0070062	GO:0016787=hydrolase activity	GO:0070062=extracellular exosome|GO:0005737=cytoplasm|GO:0016021=integral component of membrane	GO:0008152=metabolic process	THC2471728	ENST00000273596	Hs.534400	25864
ABHD14B	-0.0456035	Detected	0.0456035	Detected	0	0.208603	Detected	0.457314	Detected	0.332958	0.128457	281	295	272	378	NM_032750	ref|Homo sapiens abhydrolase domain containing 14B (ABHD14B), transcript variant 1, mRNA [NM_032750]	abhydrolase domain containing 14B	ref|NM_032750|ref|NM_001146314|ref|NM_001254753|ens|ENST00000361143	GO:0005515|GO:0005737|GO:0016787|GO:0045944|GO:0008152|GO:0005730|GO:0005634|GO:0070062|GO:0005829	GO:0005515=protein binding|GO:0016787=hydrolase activity	GO:0005634=nucleus|GO:0070062=extracellular exosome|GO:0005737=cytoplasm|GO:0005829=cytosol|GO:0005730=nucleolus	GO:0008152=metabolic process|GO:0045944=positive regulation of transcription from RNA polymerase II promoter	THC2599446	ENST00000361143	Hs.420796	84836
ABHD15	0.0929198	Detected	-0.0929198	Detected	0	-0.153399	Detected	-0.195384	Detected	-0.174391	0.208635	247	214	169	192	NM_198147	ref|Homo sapiens abhydrolase domain containing 15 (ABHD15), mRNA [NM_198147]	abhydrolase domain containing 15	ref|NM_198147|ens|ENST00000307201|gb|AY358212|gb|AK056717	GO:0016787|GO:0016020|GO:0008152|GO:0005576	GO:0016787=hydrolase activity	GO:0016020=membrane|GO:0005576=extracellular region	GO:0008152=metabolic process	THC2471398	ENST00000307201	Hs.106510	116236
ABHD16B	0.449384	Compromised	-0.449384	Compromised	2.3e-07	0.555945	Compromised	-0.771907	Compromised	-0.107981	0.90519	4.2	2.22	3.67	1.71	NM_080622	ref|Homo sapiens abhydrolase domain containing 16B (ABHD16B), mRNA [NM_080622]	abhydrolase domain containing 16B	ref|NM_080622|ens|ENST00000369916|gb|BC031949|tc|THC2479060	GO:0016787|GO:0008152	GO:0016787=hydrolase activity		GO:0008152=metabolic process	THC2479060	ENST00000369916	Hs.266774	140701
ABHD17A	-0.0299718	Detected	0.0299718	Detected	0	0.0899503	Detected	0.109114	Detected	0.0995324	0.0870874	1169.02	1200.95	1031.01	1222.03	NM_031213	ref|Homo sapiens abhydrolase domain containing 17A (ABHD17A), transcript variant 1, mRNA [NM_031213]	abhydrolase domain containing 17A	ref|NM_031213|ref|NM_001130111|ens|ENST00000411545|ens|ENST00000592757	GO:0005515|GO:0008150|GO:0016787|GO:0016020|GO:0008152|GO:0005576	GO:0005515=protein binding|GO:0016787=hydrolase activity	GO:0016020=membrane|GO:0005576=extracellular region	GO:0008150=biological_process|GO:0008152=metabolic process	THC2551680	ENST00000411545	Hs.465542	81926
ABHD17B	0.04179	Detected	-0.04179	Detected	0	-0.377337	Detected	-0.614524	Detected	-0.495931	0.0586835	194.463	180.858	118.034	117.128	NM_001025780	ref|Homo sapiens abhydrolase domain containing 17B (ABHD17B), transcript variant 2, mRNA [NM_001025780]	abhydrolase domain containing 17B	ref|NM_001025780|ens|ENST00000333421|ref|XM_006717134|gb|BC044576	GO:0016787|GO:0016020|GO:0008152|GO:0005576	GO:0016787=hydrolase activity	GO:0016020=membrane|GO:0005576=extracellular region	GO:0008152=metabolic process	THC2484355	ENST00000377041	Hs.380389	51104
ABHD17C	0.0253432	Detected	-0.0253432	Detected	0	-0.210683	Detected	-0.0595162	Detected	-0.1351	0.232217	1010	961	696	904	NM_021214	ref|Homo sapiens abhydrolase domain containing 17C (ABHD17C), mRNA [NM_021214]	abhydrolase domain containing 17C	ref|NM_021214|ens|ENST00000258884|ens|ENST00000558464|ens|ENST00000559506	GO:0016787|GO:0008152	GO:0016787=hydrolase activity		GO:0008152=metabolic process	THC2464839	ENST00000258884	Hs.459072	58489
ABHD2	-0.0130901	Detected	0.0130901	Detected	0	-0.201798	Detected	-0.0628982	Detected	-0.132348	0.201988	84.4	84.7	60.1	77.4	NM_007011	ref|Homo sapiens abhydrolase domain containing 2 (ABHD2), transcript variant 1, mRNA [NM_007011]	abhydrolase domain containing 2	ref|NM_007011|ref|NM_152924|ens|ENST00000352732|ens|ENST00000355100	GO:0052689|GO:0008150|GO:0003674|GO:0030336|GO:0008152|GO:0009611|GO:0016021	GO:0052689=carboxylic ester hydrolase activity|GO:0003674=molecular_function	GO:0016021=integral component of membrane	GO:0008150=biological_process|GO:0008152=metabolic process|GO:0009611=response to wounding|GO:0030336=negative regulation of cell migration	THC2491788	ENST00000352732	Hs.122337	11057
ABHD3	0.0109394	Detected	-0.0109394	Detected	0	-0.486809	Detected	-0.367585	Detected	-0.427197	0.0195395	341	331	196	249	NM_138340	ref|Homo sapiens abhydrolase domain containing 3 (ABHD3), mRNA [NM_138340]	abhydrolase domain containing 3	ref|NM_138340|ens|ENST00000577564|ens|ENST00000289119|ref|XR_243847	GO:0052689|GO:0008150|GO:0003674|GO:0008152|GO:0016021|GO:0005575	GO:0052689=carboxylic ester hydrolase activity|GO:0003674=molecular_function	GO:0016021=integral component of membrane|GO:0005575=cellular_component	GO:0008150=biological_process|GO:0008152=metabolic process	THC2687867	ENST00000577564	Hs.397978	171586
ABHD4	0.00171971	Detected	-0.00171971	Detected	0	0.532206	Detected	0.44726	Detected	0.489733	0.0074499	772	759	905	998	NM_022060	ref|Homo sapiens abhydrolase domain containing 4 (ABHD4), mRNA [NM_022060]	abhydrolase domain containing 4	ref|NM_022060|ens|ENST00000428304|ref|XR_245712|ref|XM_005267986	GO:0016042|GO:0016787	GO:0016787=hydrolase activity		GO:0016042=lipid catabolic process	THC2462099	ENST00000428304	Hs.445665	63874
ABHD5	-0.0429561	Detected	0.0429561	Detected	0	-0.129447	Detected	-0.0270941	Detected	-0.0782707	0.362088	1740	1820	1330	1670	NM_016006	ref|Homo sapiens abhydrolase domain containing 5 (ABHD5), mRNA [NM_016006]	abhydrolase domain containing 5	ref|NM_016006|ens|ENST00000458276|gb|AF151816|gb|BC021958	GO:0005811|GO:0004806|GO:0042171|GO:0010898|GO:0005634|GO:0044281|GO:0003841|GO:0030154|GO:0043231|GO:0005829|GO:0005737|GO:0010891|GO:0006631|GO:0019433|GO:0006654|GO:0051006	GO:0003841=1-acylglycerol-3-phosphate O-acyltransferase activity|GO:0042171=lysophosphatidic acid acyltransferase activity|GO:0004806=triglyceride lipase activity	GO:0005811=lipid particle|GO:0005634=nucleus|GO:0005737=cytoplasm|GO:0043231=intracellular membrane-bounded organelle|GO:0005829=cytosol	GO:0010891=negative regulation of sequestering of triglyceride|GO:0006631=fatty acid metabolic process|GO:0006654=phosphatidic acid biosynthetic process|GO:0044281=small molecule metabolic process|GO:0030154=cell differentiation|GO:0010898=positive regulation of triglyceride catabolic process|GO:0019433=triglyceride catabolic process|GO:0051006=positive regulation of lipoprotein lipase activity	THC2464058	ENST00000458276	Hs.19385	51099
ABHD6	0.0250728	Detected	-0.0250728	Detected	0	-0.183085	Detected	-0.249607	Detected	-0.216346	0.0351253	353	336	248	277	NM_020676	ref|Homo sapiens abhydrolase domain containing 6 (ABHD6), mRNA [NM_020676]	abhydrolase domain containing 6	ref|NM_020676|ens|ENST00000478253|ens|ENST00000613521|ens|ENST00000295962	GO:0005739|GO:0030336|GO:0032281|GO:0008152|GO:0047372|GO:0060292|GO:2000124|GO:0070062	GO:0047372=acylglycerol lipase activity	GO:0032281=AMPA glutamate receptor complex|GO:0070062=extracellular exosome|GO:0005739=mitochondrion	GO:0008152=metabolic process|GO:2000124=regulation of endocannabinoid signaling pathway|GO:0060292=long term synaptic depression|GO:0030336=negative regulation of cell migration	THC2516111	ENST00000478253	Hs.476454	57406
ABHD8	0.0347707	Detected	-0.0347707	Detected	0	0.0791647	Detected	-0.028259	Detected	0.0254529	0.729222	460	432	385	418	NM_024527	ref|Homo sapiens abhydrolase domain containing 8 (ABHD8), mRNA [NM_024527]	abhydrolase domain containing 8	ref|NM_024527|ens|ENST00000247706|gb|AK021805|gb|BC011536	GO:0016787|GO:0008152|GO:0070062	GO:0016787=hydrolase activity	GO:0070062=extracellular exosome	GO:0008152=metabolic process	THC2467201	ENST00000247706	Hs.515664	79575
ABI1	-0.0336778	Detected	0.0336778	Detected	0	-0.263603	Detected	-0.40889	Detected	-0.336246	0.0522969	276	285	191	202	NM_005470	ref|Homo sapiens abl-interactor 1 (ABI1), transcript variant 1, mRNA [NM_005470]	abl-interactor 1	ref|NM_005470|ref|NM_001178116|ref|NM_001012750|ref|NM_001178119	GO:0008092|GO:0005515|GO:0031209|GO:0008285|GO:0030054|GO:0005783|GO:0061098|GO:0001756|GO:0006928|GO:0005634|GO:0030175|GO:0032403|GO:0005829|GO:0030426|GO:0005622|GO:0030296|GO:0045211|GO:0005856|GO:0070062|GO:0072673|GO:0048010|GO:0014069|GO:0018108|GO:0030027|GO:0035855|GO:0008154|GO:0045087|GO:0007169|GO:0038096	GO:0032403=protein complex binding|GO:0005515=protein binding|GO:0030296=protein tyrosine kinase activator activity|GO:0008092=cytoskeletal protein binding	GO:0014069=postsynaptic density|GO:0030426=growth cone|GO:0070062=extracellular exosome|GO:0045211=postsynaptic membrane|GO:0005829=cytosol|GO:0030027=lamellipodium|GO:0005783=endoplasmic reticulum|GO:0005622=intracellular|GO:0031209=SCAR complex|GO:0005634=nucleus|GO:0005856=cytoskeleton|GO:0030054=cell junction|GO:0030175=filopodium	GO:0018108=peptidyl-tyrosine phosphorylation|GO:0008285=negative regulation of cell proliferation|GO:0061098=positive regulation of protein tyrosine kinase activity|GO:0038096=Fc-gamma receptor signaling pathway involved in phagocytosis|GO:0035855=megakaryocyte development|GO:0008154=actin polymerization or depolymerization|GO:0007169=transmembrane receptor protein tyrosine kinase signaling pathw…	THC2462802	ENST00000346832	Hs.508148	10006
ABI2	-0.0209403	Detected	0.0209403	Detected	0	-0.487823	Detected	-0.126551	Detected	-0.307187	0.233229	68.8	69.8	40.4	60.7	NM_005759	ref|Homo sapiens abl-interactor 2 (ABI2), transcript variant 3, mRNA [NM_005759]	abl-interactor 2	ref|NM_005759|ref|NM_001282925|ref|NM_001282932|ref|NM_001282926	GO:0005515|GO:0031209|GO:0017124|GO:0006928|GO:0018108|GO:0030175|GO:0032403|GO:0003677|GO:0030027|GO:0005829|GO:0048365|GO:0005737|GO:0016601|GO:0016477|GO:0008154|GO:0007010|GO:2000601|GO:0019900|GO:0005856|GO:0070064|GO:0031625|GO:0008093	GO:0008093=cytoskeletal adaptor activity|GO:0003677=DNA binding|GO:0070064=proline-rich region binding|GO:0005515=protein binding|GO:0031625=ubiquitin protein ligase binding|GO:0048365=Rac GTPase binding|GO:0017124=SH3 domain binding|GO:0032403=protein complex binding|GO:0019900=kinase binding	GO:0031209=SCAR complex|GO:0005856=cytoskeleton|GO:0005737=cytoplasm|GO:0030175=filopodium|GO:0005829=cytosol|GO:0030027=lamellipodium	GO:0016601=Rac protein signal transduction|GO:0018108=peptidyl-tyrosine phosphorylation|GO:0007010=cytoskeleton organization|GO:0008154=actin polymerization or depolymerization|GO:0006928=movement of cell or subcellular component|GO:2000601=positive regulation of Arp2/3 complex-mediated actin nucleation|GO:0016477=cell migration	THC2570024	ENST00000261018	Hs.471156	10152
ABI3	-0.0145495	Detected	0.0145495	Detected	0	-0.174828	Detected	0.34492	Detected	0.0850464	0.774884	17.9	18	13	21.8	NM_016428	ref|Homo sapiens ABI family, member 3 (ABI3), transcript variant 1, mRNA [NM_016428]	ABI family, member 3	ref|NM_016428|ref|NM_001135186|ens|ENST00000419580|ens|ENST00000225941	GO:0030334|GO:0005622|GO:0005515|GO:0005737|GO:0016020|GO:0006928|GO:0018108|GO:0030027	GO:0005515=protein binding	GO:0005737=cytoplasm|GO:0016020=membrane|GO:0005622=intracellular|GO:0030027=lamellipodium	GO:0018108=peptidyl-tyrosine phosphorylation|GO:0006928=movement of cell or subcellular component|GO:0030334=regulation of cell migration	THC2604731	ENST00000419580	Hs.130719	51225
ABI3BP	-0.103449	Compromised	0.103448	Compromised	-2.4e-07	0.0635285	Compromised	-0.146867	Compromised	-0.0416691	0.804163	2.46577	2.80475	2.24676	2.2713	NM_015429	ref|Homo sapiens ABI family, member 3 (NESH) binding protein (ABI3BP), mRNA [NM_015429]	ABI family, member 3 (NESH) binding protein	ref|NM_015429|ens|ENST00000475896|ens|ENST00000284322|ref|XM_005247318	GO:0031012|GO:0030198|GO:0010811|GO:0005518|GO:0005614|GO:0008201|GO:0005615	GO:0005518=collagen binding|GO:0008201=heparin binding	GO:0005615=extracellular space|GO:0005614=interstitial matrix|GO:0031012=extracellular matrix	GO:0030198=extracellular matrix organization|GO:0010811=positive regulation of cell-substrate adhesion	THC2483291	ENST00000284322	Hs.477015	25890
ABL1	0.0512805	Detected	-0.0512805	Detected	0	-0.187846	Detected	0.00619411	Detected	-0.090826	0.494901	215.586	197.882	148.243	198.353	NM_007313	ref|Homo sapiens ABL proto-oncogene 1, non-receptor tyrosine kinase (ABL1), transcript variant b, mRNA [NM_007313]	ABL proto-oncogene 1, non-receptor tyrosine kinase	ref|NM_007313|ens|ENST00000372348|gb|M14753|gb|AB209456	GO:0005515|GO:0002333|GO:0046632|GO:0050731|GO:0048538|GO:0048536|GO:0030155|GO:0030154|GO:0042692|GO:0007173|GO:0007411|GO:0030100|GO:0042127|GO:0034446|GO:0006298|GO:0043123|GO:0033690|GO:0038083|GO:0006979|GO:0043124|GO:0019905|GO:0031965|GO:0022408|GO:0000287|GO:0002322|GO:0021587|GO:0018108|GO:0031234|GO:0042770|GO:0045931|GO:0045930|GO:0045087|GO:0004515|GO:0010506|GO:0005654|GO:0038096|GO:…	GO:0008022=protein C-terminus binding|GO:0030145=manganese ion binding|GO:0019905=syntaxin binding|GO:0004672=protein kinase activity|GO:0003785=actin monomer binding|GO:0005515=protein binding|GO:0000287=magnesium ion binding|GO:0005524=ATP binding|GO:0004515=nicotinate-nucleotide adenylyltransferase activity|GO:0004713=protein tyrosine kinase activity|GO:0004715=non-membrane spanning protein ty…	GO:0015629=actin cytoskeleton|GO:0031234=extrinsic component of cytoplasmic side of plasma membrane|GO:0005829=cytosol|GO:0005634=nucleus|GO:0005730=nucleolus|GO:0005654=nucleoplasm|GO:0031252=cell leading edge|GO:0031965=nuclear membrane|GO:0048471=perinuclear region of cytoplasm|GO:0005737=cytoplasm|GO:0005739=mitochondrion	GO:0007050=cell cycle arrest|GO:0018108=peptidyl-tyrosine phosphorylation|GO:0007173=epidermal growth factor receptor signaling pathway|GO:0022408=negative regulation of cell-cell adhesion|GO:0042770=signal transduction in response to DNA damage|GO:0007411=axon guidance|GO:0002322=B cell proliferation involved in immune response|GO:0006914=autophagy|GO:0030100=regulation of endocytosis|GO:0033690…	NP523662	ENST00000318560	Hs.431048	25
ABL2	-0.101771	Detected	0.101771	Detected	0	-0.0133817	Detected	-1.17647	Detected	-0.594925	0.419699	177.558	201.499	153.21	80.0234	NM_007314	ref|Homo sapiens ABL proto-oncogene 2, non-receptor tyrosine kinase (ABL2), transcript variant b, mRNA [NM_007314]	ABL proto-oncogene 2, non-receptor tyrosine kinase	ref|NM_007314|ref|NM_001168236|ref|NM_005158|ref|NM_001168237	GO:0005515|GO:0006909|GO:0051353|GO:0071300|GO:0046632|GO:2000145|GO:2000096|GO:0030155|GO:2000249|GO:0051015|GO:0007173|GO:0007411|GO:0030100|GO:0042127|GO:0050885|GO:0070374|GO:0043123|GO:0038083|GO:0051017|GO:0035640|GO:0022408|GO:0000287|GO:0021587|GO:0018108|GO:0001891|GO:0030027|GO:0031234|GO:0097062|GO:0008542|GO:0045087|GO:0010976|GO:0010506|GO:0035024|GO:0015629|GO:0007204|GO:0005829|GO:…	GO:0030145=manganese ion binding|GO:0004672=protein kinase activity|GO:0003785=actin monomer binding|GO:0051015=actin filament binding|GO:0005515=protein binding|GO:0000287=magnesium ion binding|GO:0005524=ATP binding|GO:0004713=protein tyrosine kinase activity|GO:0004715=non-membrane spanning protein tyrosine kinase activity|GO:0005102=receptor binding	GO:0043197=dendritic spine|GO:0015629=actin cytoskeleton|GO:0031234=extrinsic component of cytoplasmic side of plasma membrane|GO:0005829=cytosol|GO:0030027=lamellipodium|GO:0001891=phagocytic cup	GO:0018108=peptidyl-tyrosine phosphorylation|GO:0035640=exploration behavior|GO:0032092=positive regulation of protein binding|GO:0007173=epidermal growth factor receptor signaling pathway|GO:0022408=negative regulation of cell-cell adhesion|GO:0007411=axon guidance|GO:0008542=visual learning|GO:0010976=positive regulation of neuron projection development|GO:0030100=regulation of endocytosis|GO:2…	THC2501440	ENST00000502732	Hs.159472	27
ABLIM1	-0.0360622	Detected	0.0360622	Detected	0	-0.421664	Detected	-0.160399	Detected	-0.291032	0.164825	94.221	97.6156	58.5341	82.0561	NM_001003408	ref|Homo sapiens actin binding LIM protein 1 (ABLIM1), transcript variant 3, mRNA [NM_001003408]	actin binding LIM protein 1	ref|NM_001003408|ref|NM_001003407|ref|NM_002313|ref|NM_006720	GO:0005515|GO:0001725|GO:0030032|GO:0003779|GO:0015629|GO:0030027|GO:0042384|GO:0005737|GO:0007411|GO:0045944|GO:0007010|GO:0009887|GO:0008270|GO:0007601	GO:0008270=zinc ion binding|GO:0005515=protein binding|GO:0003779=actin binding	GO:0005737=cytoplasm|GO:0001725=stress fiber|GO:0015629=actin cytoskeleton|GO:0030027=lamellipodium	GO:0007010=cytoskeleton organization|GO:0007411=axon guidance|GO:0045944=positive regulation of transcription from RNA polymerase II promoter|GO:0007601=visual perception|GO:0009887=organ morphogenesis|GO:0042384=cilium assembly|GO:0030032=lamellipodium assembly	THC2610804	ENST00000369252	Hs.438236	3983
ABLIM2	-0.038914	Detected	0.038914	Detected	0	-0.449422	Detected	-0.170873	Detected	-0.310147	0.165156	82.3913	85.6979	50.309	71.3757	NM_001130083	ref|Homo sapiens actin binding LIM protein family, member 2 (ABLIM2), transcript variant 1, mRNA [NM_001130083]	actin binding LIM protein family, member 2	ref|NM_001130083|ref|NM_001130084|ref|NM_001130085|ref|NM_001130086	GO:0030036|GO:0007411|GO:0045944|GO:0008270|GO:0003779|GO:0030016|GO:0015629|GO:0006351	GO:0008270=zinc ion binding|GO:0003779=actin binding	GO:0015629=actin cytoskeleton|GO:0030016=myofibril	GO:0006351=transcription, DNA-templated|GO:0007411=axon guidance|GO:0045944=positive regulation of transcription from RNA polymerase II promoter|GO:0030036=actin cytoskeleton organization	NP1277327	ENST00000514025	Hs.233404	84448
ABLIM3	0.0644817	Detected	-0.0644817	Detected	0	0.0846953	Detected	-1.60391	Detected	-0.759609	0.464349	97.2	87.6	80	29.0283	NM_014945	ref|Homo sapiens actin binding LIM protein family, member 3 (ABLIM3), transcript variant 2, mRNA [NM_014945]	actin binding LIM protein family, member 3	ref|NM_014945|ref|NM_001301028|ref|NM_001301015|ref|NM_001301027	GO:0042384|GO:0005737|GO:0001725|GO:0030036|GO:0007411|GO:0045944|GO:0030032|GO:0008270|GO:0003779|GO:0030027|GO:0006351	GO:0008270=zinc ion binding|GO:0003779=actin binding	GO:0005737=cytoplasm|GO:0001725=stress fiber|GO:0030027=lamellipodium	GO:0006351=transcription, DNA-templated|GO:0042384=cilium assembly|GO:0007411=axon guidance|GO:0030032=lamellipodium assembly|GO:0045944=positive regulation of transcription from RNA polymerase II promoter|GO:0030036=actin cytoskeleton organization	THC2620690	ENST00000506113	Hs.49688	22885
ABO	0.0270791	Detected	-0.0270791	Detected	0	-0.300202	Detected	-0.402676	Detected	-0.351439	0.026131	86.1337	81.7579	55.7173	60.701	ENST00000453660	ens|ABO blood group (transferase A, alpha 1-3-N-acetylgalactosaminyltransferase; transferase B, alpha 1-3-galactosyltransferase) [Source:HGNC Symbol;Acc:HGNC:79] [ENST00000453660]	ABO blood group (transferase A, alpha 1-3-N-acetylgalactosaminyltransferase; transferase B, alpha 1-3-galactosyltransferase)	ens|ENST00000453660|linc|lnc-OBP2B-1:1|linc|TCONS_00016890|gb|AK124587	GO:0004381|GO:0032580|GO:0004380|GO:0006486|GO:0005576|GO:0016021|GO:0046872	GO:0004380=glycoprotein-fucosylgalactoside alpha-N-acetylgalactosaminyltransferase activity|GO:0046872=metal ion binding|GO:0004381=fucosylgalactoside 3-alpha-galactosyltransferase activity	GO:0032580=Golgi cisterna membrane|GO:0016021=integral component of membrane|GO:0005576=extracellular region	GO:0006486=protein glycosylation	THC2491790	ENST00000453660	Hs.654423	28
ABR	-0.109845	Detected	0.109845	Detected	0	-0.111989	Detected	0.454314	Detected	0.171162	0.629809	245.186	281.377	198.696	344.125	NM_021962	ref|Homo sapiens active BCR-related (ABR), transcript variant 1, mRNA [NM_021962]	active BCR-related	ref|NM_021962|ref|NM_001159746|ref|NM_001092|ref|NM_001282149	GO:0043314|GO:0051056|GO:0048011|GO:0030336|GO:0043065|GO:0030036|GO:0042472|GO:0005886|GO:0007264|GO:0097190|GO:0032855|GO:0005829|GO:0050766|GO:0016020|GO:0007420|GO:0050728|GO:0050885|GO:0032496|GO:0005089|GO:0030675|GO:0005096	GO:0005096=GTPase activator activity|GO:0005089=Rho guanyl-nucleotide exchange factor activity|GO:0030675=GTPase activator activity	GO:0005886=plasma membrane|GO:0016020=membrane|GO:0005829=cytosol	GO:0007264=small GTPase mediated signal transduction|GO:0050728=negative regulation of inflammatory response|GO:0097190=apoptotic signaling pathway|GO:0007420=brain development|GO:0043314=negative regulation of neutrophil degranulation|GO:0048011=neurotrophin TRK receptor signaling pathway|GO:0051056=regulation of small GTPase mediated signal transduction|GO:0043065=positive regulation of apoptot…	THC2498261	ENST00000544583	Hs.159306	29
ABRA	-0.0214329	Compromised	0.0214329	Compromised	0	0.117117	Compromised	-0.00614119	Compromised	0.0554879	0.484673	1.97	2	1.76	1.89	NM_139166	ref|Homo sapiens actin-binding Rho activating protein (ABRA), mRNA [NM_139166]	actin-binding Rho activating protein	ref|NM_139166|ens|ENST00000311955|gb|AK056976|gb|AL833422	GO:0051091|GO:0005886|GO:0045944|GO:0035025|GO:0003713|GO:0003779|GO:0015629|GO:0030017|GO:0006351|GO:0000060	GO:0003713=transcription coactivator activity|GO:0003779=actin binding	GO:0015629=actin cytoskeleton|GO:0005886=plasma membrane|GO:0030017=sarcomere	GO:0035025=positive regulation of Rho protein signal transduction|GO:0006351=transcription, DNA-templated|GO:0000060=protein import into nucleus, translocation|GO:0051091=positive regulation of sequence-specific DNA binding transcription factor activity|GO:0045944=positive regulation of transcription from RNA polymerase II promoter	THC2601291	ENST00000311955	Hs.374668	137735
ABRACL	0.0627117	Detected	-0.0627122	Detected	-2.37e-07	0.0419545	Detected	-0.0995812	Detected	-0.0288134	0.789365	14500	13100	11600	12300	NM_021243	ref|Homo sapiens ABRA C-terminal like (ABRACL), mRNA [NM_021243]	ABRA C-terminal like	ref|NM_021243|ens|ENST00000367660|gb|BC014953|gb|AF161398					THC2463611	ENST00000367660	Hs.600861	58527
ABT1	-0.0517619	Detected	0.0517619	Detected	0	-0.319326	Detected	-0.0230968	Detected	-0.171211	0.389106	221	234	149	214	NM_013375	ref|Homo sapiens activator of basal transcription 1 (ABT1), mRNA [NM_013375]	activator of basal transcription 1	ref|NM_013375|ens|ENST00000274849|tc|THC2466588|tc|THC2659638	GO:0005515|GO:0005667|GO:0021522|GO:0006366|GO:0006357|GO:0000166|GO:0003713|GO:0005730|GO:0005634|GO:0003677	GO:0000166=nucleotide binding|GO:0003677=DNA binding|GO:0005515=protein binding|GO:0003713=transcription coactivator activity	GO:0005667=transcription factor complex|GO:0005634=nucleus|GO:0005730=nucleolus	GO:0021522=spinal cord motor neuron differentiation|GO:0006366=transcription from RNA polymerase II promoter|GO:0006357=regulation of transcription from RNA polymerase II promoter	THC2466588	ENST00000274849	Hs.254406	29777
ABTB1	-0.0158622	Detected	0.0158622	Detected	0	0.0608337	Detected	0.00385928	Detected	0.0323465	0.425722	718.123	723.45	614.646	691.079	NM_032548	ref|Homo sapiens ankyrin repeat and BTB (POZ) domain containing 1 (ABTB1), transcript variant 1, mRNA [NM_032548]	ankyrin repeat and BTB (POZ) domain containing 1	ref|NM_032548|ref|NM_172027|ref|NR_033429|ens|ENST00000464431	GO:0005737|GO:0005886|GO:0005730|GO:0003746|GO:0006414	GO:0003746=translation elongation factor activity	GO:0005737=cytoplasm|GO:0005730=nucleolus|GO:0005886=plasma membrane	GO:0006414=translational elongation	NP852599	ENST00000464431	Hs.107812	80325
ABTB2	-0.0105307	Detected	0.0105307	Detected	0	0.0139849	Detected	0.19413	Detected	0.104058	0.369937	1490	1490	1230	1630	NM_145804	ref|Homo sapiens ankyrin repeat and BTB (POZ) domain containing 2 (ABTB2), mRNA [NM_145804]	ankyrin repeat and BTB (POZ) domain containing 2	ref|NM_145804|ens|ENST00000435224|gb|AK095632|gb|AK091560	GO:0003674|GO:0046982|GO:0097237|GO:0005654|GO:0005634|GO:0005575	GO:0046982=protein heterodimerization activity|GO:0003674=molecular_function	GO:0005634=nucleus|GO:0005575=cellular_component|GO:0005654=nucleoplasm	GO:0097237=cellular response to toxic substance	THC2464560	ENST00000435224	Hs.23361	25841
ACAA1	-2.21922	Detected	2.21922	Detected	0	2.20874	Detected	2.15127	Detected	2.18001	0.429544	207.787	4440	3630	4080	ENST00000451419	ens|acetyl-CoA acyltransferase 1 [Source:HGNC Symbol;Acc:HGNC:82] [ENST00000451419]	acetyl-CoA acyltransferase 1	ens|ENST00000451419|linc|lnc-ACAA1-1:1|gb|BG533949	GO:0005515|GO:0000038|GO:0006635|GO:0016401|GO:0005782|GO:0044281|GO:0036109|GO:0033559|GO:0043231|GO:0016020|GO:0008206|GO:0033540|GO:0003988|GO:0044255|GO:0005777	GO:0005515=protein binding|GO:0003988=acetyl-CoA C-acyltransferase activity|GO:0016401=palmitoyl-CoA oxidase activity	GO:0005782=peroxisomal matrix|GO:0005777=peroxisome|GO:0043231=intracellular membrane-bounded organelle|GO:0016020=membrane	GO:0033540=fatty acid beta-oxidation using acyl-CoA oxidase|GO:0044255=cellular lipid metabolic process|GO:0000038=very long-chain fatty acid metabolic process|GO:0008206=bile acid metabolic process|GO:0044281=small molecule metabolic process|GO:0006635=fatty acid beta-oxidation|GO:0036109=alpha-linolenic acid metabolic process|GO:0033559=unsaturated fatty acid metabolic process		ENST00000451419	Hs.706310	30
ACAA2	0.0757592	Detected	-0.0757592	Detected	0	-0.197464	Detected	-0.217784	Detected	-0.207624	0.113018	2040	1810	1370	1580	NM_006111	ref|Homo sapiens acetyl-CoA acyltransferase 2 (ACAA2), mRNA [NM_006111]	acetyl-CoA acyltransferase 2	ref|NM_006111|ens|ENST00000591171|gb|AK054673|gb|AK093311	GO:0005739|GO:0005515|GO:0006695|GO:0006631|GO:0005743|GO:0071456|GO:0003988|GO:0070062	GO:0005515=protein binding|GO:0003988=acetyl-CoA C-acyltransferase activity	GO:0070062=extracellular exosome|GO:0005739=mitochondrion|GO:0005743=mitochondrial inner membrane	GO:0006695=cholesterol biosynthetic process|GO:0071456=cellular response to hypoxia|GO:0006631=fatty acid metabolic process	THC2469571	ENST00000591171	Hs.200136	10449
ACACA	0.0193059	Detected	-0.0193059	Detected	0	-0.0190923	Detected	0.00101209	Detected	-0.00904012	0.718219	619.949	594.829	489.932	581.087	NM_198839	ref|Homo sapiens acetyl-CoA carboxylase alpha (ACACA), transcript variant 2, mRNA [NM_198839]	acetyl-CoA carboxylase alpha	ref|NM_198839|ref|NM_198834|ref|NM_198836|ens|ENST00000612007	GO:0005515|GO:0006768|GO:0006767|GO:0035338|GO:0044281|GO:0015629|GO:0046872|GO:0005829|GO:0005739|GO:0005737|GO:0001894|GO:0051289|GO:0019432|GO:0006633|GO:0003989|GO:0044255|GO:0070062|GO:0006853|GO:0055088|GO:0005730|GO:2001295|GO:0006084|GO:0005524|GO:0006112|GO:0031325|GO:0006766|GO:0004075|GO:0044268	GO:0005524=ATP binding|GO:0003989=acetyl-CoA carboxylase activity|GO:0004075=biotin carboxylase activity|GO:0005515=protein binding|GO:0046872=metal ion binding	GO:0005730=nucleolus|GO:0070062=extracellular exosome|GO:0015629=actin cytoskeleton|GO:0005829=cytosol|GO:0005737=cytoplasm|GO:0005739=mitochondrion	GO:2001295=malonyl-CoA biosynthetic process|GO:0006084=acetyl-CoA metabolic process|GO:0044255=cellular lipid metabolic process|GO:0006766=vitamin metabolic process|GO:0044281=small molecule metabolic process|GO:0051289=protein homotetramerization|GO:0035338=long-chain fatty-acyl-CoA biosynthetic process|GO:0055088=lipid homeostasis|GO:0006112=energy reserve metabolic process|GO:0044268=multicell…	NP831371	ENST00000612007	Hs.160556	31
ACACB	-0.0197787	Detected	0.0197787	Detected	0	-0.00388479	Detected	-0.102355	Detected	-0.0531197	0.422211	115.77	117.264	94.9994	103.784	NM_001093	ref|Homo sapiens acetyl-CoA carboxylase beta (ACACB), mRNA [NM_001093]	acetyl-CoA carboxylase beta	ref|NM_001093|ens|ENST00000377848|ens|ENST00000338432|ref|XR_429097	GO:0005515|GO:0014070|GO:0006768|GO:0006767|GO:0060421|GO:0005741|GO:0005634|GO:0044281|GO:0046872|GO:0005829|GO:0005739|GO:0051289|GO:0006633|GO:0003989|GO:0044255|GO:0006853|GO:0042493|GO:0046322|GO:0010884|GO:2001295|GO:0006084|GO:0005524|GO:0012505|GO:0006112|GO:0031325|GO:0006766|GO:0009374|GO:0004075	GO:0009374=biotin binding|GO:0005524=ATP binding|GO:0003989=acetyl-CoA carboxylase activity|GO:0004075=biotin carboxylase activity|GO:0005515=protein binding|GO:0046872=metal ion binding	GO:0005829=cytosol|GO:0005741=mitochondrial outer membrane|GO:0005634=nucleus|GO:0005739=mitochondrion|GO:0012505=endomembrane system	GO:2001295=malonyl-CoA biosynthetic process|GO:0060421=positive regulation of heart growth|GO:0006084=acetyl-CoA metabolic process|GO:0044255=cellular lipid metabolic process|GO:0006766=vitamin metabolic process|GO:0044281=small molecule metabolic process|GO:0051289=protein homotetramerization|GO:0046322=negative regulation of fatty acid oxidation|GO:0006112=energy reserve metabolic process|GO:00…	THC2506477	ENST00000538526	Hs.234898	32
ACAD10	-0.0232315	Detected	0.0232315	Detected	0	0.146164	Detected	0.178386	Detected	0.162275	0.0290362	179.123	182.305	163.487	195.54	NM_025247	ref|Homo sapiens acyl-CoA dehydrogenase family, member 10 (ACAD10), transcript variant 2, mRNA [NM_025247]	acyl-CoA dehydrogenase family, member 10	ref|NM_025247|ref|NM_001136538|ens|ENST00000547491|ens|ENST00000508303	GO:0005739|GO:0016787|GO:0050660|GO:0003995|GO:0055114|GO:0016772	GO:0003995=acyl-CoA dehydrogenase activity|GO:0050660=flavin adenine dinucleotide binding|GO:0016772=transferase activity, transferring phosphorus-containing groups|GO:0016787=hydrolase activity	GO:0005739=mitochondrion	GO:0055114=oxidation-reduction process	NP1163233	ENST00000413681	Hs.331141	80724
ACAD11	-0.0960865	Detected	0.0960867	Detected	1.2e-07	0.450196	Detected	0.0721242	Detected	0.26116	0.343269	13.5	15.2	16	14.4	NM_032169	ref|Homo sapiens acyl-CoA dehydrogenase family, member 11 (ACAD11), mRNA [NM_032169]	acyl-CoA dehydrogenase family, member 11	ref|NM_032169|ref|NR_037804|ens|ENST00000485198|ens|ENST00000264990	GO:0017099|GO:0031966|GO:0050660|GO:0005634|GO:0070991|GO:0033539|GO:0004466|GO:0016772|GO:0005777	GO:0070991=medium-chain-acyl-CoA dehydrogenase activity|GO:0050660=flavin adenine dinucleotide binding|GO:0017099=very-long-chain-acyl-CoA dehydrogenase activity|GO:0016772=transferase activity, transferring phosphorus-containing groups|GO:0004466=long-chain-acyl-CoA dehydrogenase activity	GO:0005634=nucleus|GO:0005777=peroxisome|GO:0031966=mitochondrial membrane	GO:0033539=fatty acid beta-oxidation using acyl-CoA dehydrogenase	THC2478579	ENST00000485198	Hs.441378	84129
ACAD8	0.0719988	Detected	-0.0719988	Detected	0	-0.419445	Detected	-0.24473	Detected	-0.332087	0.0992115	92.5	82.5	53.4	70.5	NM_014384	ref|Homo sapiens acyl-CoA dehydrogenase family, member 8 (ACAD8), mRNA [NM_014384]	acyl-CoA dehydrogenase family, member 8	ref|NM_014384|ens|ENST00000531338|ens|ENST00000533387|ens|ENST00000281182	GO:0006629|GO:0034641|GO:0006355|GO:0005759|GO:0050660|GO:0006574|GO:0009083|GO:0003995|GO:0044281|GO:0006351|GO:0055114	GO:0003995=acyl-CoA dehydrogenase activity|GO:0050660=flavin adenine dinucleotide binding	GO:0005759=mitochondrial matrix	GO:0044281=small molecule metabolic process|GO:0009083=branched-chain amino acid catabolic process|GO:0006351=transcription, DNA-templated|GO:0006629=lipid metabolic process|GO:0006574=valine catabolic process|GO:0006355=regulation of transcription, DNA-templated|GO:0055114=oxidation-reduction process|GO:0034641=cellular nitrogen compound metabolic process	THC2711968	ENST00000531338	Hs.14791	27034
ACAD9	-0.0282593	Detected	0.0282598	Detected	2.385e-07	0.0693164	Detected	0.0408235	Detected	0.0550699	0.22397	2720.57	2788.26	2362.5	2709.24	NM_014049	ref|Homo sapiens acyl-CoA dehydrogenase family, member 9 (ACAD9), transcript variant 1, mRNA [NM_014049]	acyl-CoA dehydrogenase family, member 9	ref|NM_014049|ref|NR_033426|ens|ENST00000511325|ens|ENST00000511526	GO:0005739|GO:0005515|GO:0032981|GO:0050660|GO:0005634|GO:0003995|GO:0030425|GO:0055114	GO:0003995=acyl-CoA dehydrogenase activity|GO:0005515=protein binding|GO:0050660=flavin adenine dinucleotide binding	GO:0005634=nucleus|GO:0030425=dendrite|GO:0005739=mitochondrion	GO:0055114=oxidation-reduction process|GO:0032981=mitochondrial respiratory chain complex I assembly	NP073436	ENST00000511325	Hs.567482	28976
ACADL	-0.461607	Compromised	0.461607	Compromised	0	-0.716136	Compromised	-0.484353	Compromised	-0.600244	0.334423	2.44	4.56	1.66	2.28	NM_001608	ref|Homo sapiens acyl-CoA dehydrogenase, long chain (ACADL), mRNA [NM_001608]	acyl-CoA dehydrogenase, long chain	ref|NM_001608|ens|ENST00000233710|ref|XM_005246517|gb|M74096	GO:0090181|GO:0001659|GO:0006635|GO:0016401|GO:0031966|GO:0044242|GO:0050660|GO:0045717|GO:0046322|GO:0044281|GO:0019254|GO:0033539|GO:0004466|GO:0005739|GO:0005737|GO:0051289|GO:0005759|GO:0042758|GO:0003995|GO:0000062|GO:0044255|GO:0055114|GO:0042413	GO:0004466=long-chain-acyl-CoA dehydrogenase activity|GO:0003995=acyl-CoA dehydrogenase activity|GO:0050660=flavin adenine dinucleotide binding|GO:0000062=fatty-acyl-CoA binding|GO:0016401=palmitoyl-CoA oxidase activity	GO:0031966=mitochondrial membrane|GO:0005737=cytoplasm|GO:0005759=mitochondrial matrix|GO:0005739=mitochondrion	GO:0045717=negative regulation of fatty acid biosynthetic process|GO:0042758=long-chain fatty acid catabolic process|GO:0044255=cellular lipid metabolic process|GO:0042413=carnitine catabolic process|GO:0090181=regulation of cholesterol metabolic process|GO:0044281=small molecule metabolic process|GO:0006635=fatty acid beta-oxidation|GO:0033539=fatty acid beta-oxidation using acyl-CoA dehydrogena…	THC2473208	ENST00000233710	Hs.471277	33
ACADM	0.153171	Detected	-0.153171	Detected	0	-0.130622	Detected	-0.249307	Detected	-0.189965	0.366968	330	263	220	237	NM_000016	ref|Homo sapiens acyl-CoA dehydrogenase, C-4 to C-12 straight chain (ACADM), transcript variant 1, mRNA [NM_000016]	acyl-CoA dehydrogenase, C-4 to C-12 straight chain	ref|NM_000016|ref|NM_001286043|ref|NM_001127328|ref|NM_001286042	GO:0030424|GO:0006635|GO:0050660|GO:0005634|GO:0044281|GO:0019254|GO:0033539|GO:0042802|GO:0005739|GO:0005759|GO:0045329|GO:0051793|GO:0003995|GO:0051791|GO:0070991|GO:0044255|GO:0070062|GO:0055114	GO:0042802=identical protein binding|GO:0003995=acyl-CoA dehydrogenase activity|GO:0070991=medium-chain-acyl-CoA dehydrogenase activity|GO:0050660=flavin adenine dinucleotide binding	GO:0005634=nucleus|GO:0070062=extracellular exosome|GO:0005759=mitochondrial matrix|GO:0005739=mitochondrion|GO:0030424=axon	GO:0044255=cellular lipid metabolic process|GO:0045329=carnitine biosynthetic process|GO:0044281=small molecule metabolic process|GO:0006635=fatty acid beta-oxidation|GO:0033539=fatty acid beta-oxidation using acyl-CoA dehydrogenase|GO:0051793=medium-chain fatty acid catabolic process|GO:0019254=carnitine metabolic process, CoA-linked|GO:0051791=medium-chain fatty acid metabolic process|GO:005511…	THC2493080	ENST00000420607	Hs.445040	34
ACADS	0.0438576	Detected	-0.0438576	Detected	0	0.15123	Detected	-0.0384278	Detected	0.0564013	0.643381	71.6	66.4	62.6	64.2	NM_000017	ref|Homo sapiens acyl-CoA dehydrogenase, C-2 to C-3 short chain (ACADS), transcript variant 1, mRNA [NM_000017]	acyl-CoA dehydrogenase, C-2 to C-3 short chain	ref|NM_000017|ref|NM_001302554|ens|ENST00000242592|gb|AB527081	GO:0006635|GO:0031966|GO:0050660|GO:0004085|GO:0051384|GO:0005634|GO:0044281|GO:0033539|GO:0005739|GO:0042594|GO:0051289|GO:0005759|GO:0003995|GO:0000062|GO:0046359|GO:0044255	GO:0004085=butyryl-CoA dehydrogenase activity|GO:0003995=acyl-CoA dehydrogenase activity|GO:0050660=flavin adenine dinucleotide binding|GO:0000062=fatty-acyl-CoA binding	GO:0005634=nucleus|GO:0031966=mitochondrial membrane|GO:0005759=mitochondrial matrix|GO:0005739=mitochondrion	GO:0042594=response to starvation|GO:0046359=butyrate catabolic process|GO:0044255=cellular lipid metabolic process|GO:0044281=small molecule metabolic process|GO:0006635=fatty acid beta-oxidation|GO:0033539=fatty acid beta-oxidation using acyl-CoA dehydrogenase|GO:0051289=protein homotetramerization|GO:0051384=response to glucocorticoid	NP1199290	ENST00000242592	Hs.507076	35
[truncated: 41,627 more rows]
