# Supplementary material for: Assessing the Link between Diabetic Metabolic Dysregulation and Breast Cancer Progression
Source: Int J Mol Sci. 2023 Jul 23;24(14):11816. doi: 10.3390/ijms241411816 (PMC10380477; doi:10.3390/ijms241411816)
Supplement: Supplementary file 1 [file ijms-24-11816-s001.zip › SO_8409_Complete_data_set3.xlsx]

## Sheet: Read_Me
Genotypic Technology/(SO_8409)QF/LAB/19
Dr. Shivang
				Expression fold values are provided in terms of log base 2 (Formating of color)
This file contains the fold change for all the spots in the array
Complete Data - Set 3
Experiment Details
Set_3
Slide_Id	Sample_details	Group	Analysis_Plan
257236322271_1_1	NG_1	NG	Control
257236322271_1_2	NG_2
257236322271_2_3	HG+I_1	HG+I	Test
257236322271_2_4	HG+I_2
Column Header	Description
GeneName	Unique Gene ID
Fold_NG_1	Fold change calculated as log base 2
Flag_NG_1	Detected/ Compromised
Fold_NG_2	Fold change calculated as log base 2
Flag_NG_2	Detected/ Compromised
GeoMean_NG	Average fold change for the replicate samples
Fold_HG+I_1	Fold change calculated as log base 2
Flag_HG+I_1	Detected/ Compromised
Fold_HG+I_2	Fold change calculated as log base 2
Flag_HG+I_2	Detected/ Compromised
GeoMean_HG+I	Average fold change for the replicate samples
P_Value_HG+I	Student t-test p value
gProcessed_Signal_NG_1	Background subtracted signal intensity
gProcessed_Signal_NG_2	Background subtracted signal intensity
gProcessed_Signal_HG+I_1	Background subtracted signal intensity
gProcessed_Signal_HG+I_2	Background subtracted signal intensity
SystematicName	SystematicName
Description_I	Description_I
Description_II	Description_II
Accessions	Accessions
Gene Ontology	Gene Ontology
Molecular Function	Molecular Function
Cellular Component	Cellular Component
Biological Process	Biological Process
TIGRID	TIGRID
EnsemblID	EnsemblID
UniGeneID	UniGeneID
EntrezGeneID	EntrezGeneID

## Sheet: Complete_Data
	Control_NG					Test_HG+I
GeneName	Fold_NG_1	Flag_NG_1	Fold_NG_2	Flag_NG_2	GeoMean_NG	Fold_HG+I_1	Flag_HG+I_1	Fold_HG+I_2	Flag_HG+I_2	GeoMean_HG+I	P_Value_HG+I	gProcessed_Signal_NG_1	gProcessed_Signal_NG_2	gProcessed_Signal_HG+I_1	gProcessed_Signal_HG+I_2	SystematicName	Description_I	Description_II	Accessions	Gene Ontology	Molecular Function	Cellular Component	Biological Process	TIGRID	EnsemblID	UniGeneID	EntrezGeneID
MARCH1	0.00540519	Detected	-0.00540519	Detected	0	-0.281941	Detected	-0.523971	Detected	-0.402956	0.079715	373.818	365.65	264.136	204.666	NM_017923	ref|Homo sapiens membrane-associated ring finger (C3HC4) 1, E3 ubiquitin protein ligase (MARCH1), transcript variant 2, mRNA [NM_017923]	membrane-associated ring finger (C3HC4) 1, E3 ubiquitin protein ligase	ref|NM_017923|ref|NM_001166373|ens|ENST00000339875|ens|ENST00000503008	GO:0042287|GO:0000209|GO:0004842|GO:0002495|GO:0005886|GO:0016874|GO:0005765|GO:0032588|GO:0005764|GO:0006955|GO:0031901|GO:0031902|GO:0005789|GO:0008270|GO:0016021|GO:0030659|GO:0005768	GO:0008270=zinc ion binding|GO:0042287=MHC protein binding|GO:0004842=ubiquitin-protein transferase activity|GO:0016874=ligase activity	GO:0005886=plasma membrane|GO:0005765=lysosomal membrane|GO:0005764=lysosome|GO:0031901=early endosome membrane|GO:0005789=endoplasmic reticulum membrane|GO:0031902=late endosome membrane|GO:0030659=cytoplasmic vesicle membrane|GO:0005768=endosome|GO:0016021=integral component of membrane|GO:0032588=trans-Golgi network membrane	GO:0000209=protein polyubiquitination|GO:0002495=antigen processing and presentation of peptide antigen via MHC class II|GO:0006955=immune response	THC2483811	ENST00000339875	Hs.592804	55016
Sep1	-0.0439148	Compromised	0.0439153	Compromised	2.375e-07	0.682086	Compromised	0.440165	Compromised	0.561125	0.0487782	1.9	1.99	2.71	2.1	NM_052838	ref|Homo sapiens septin 1 (SEPT1), mRNA [NM_052838]	septin 1	ref|NM_052838|ens|ENST00000566517|ens|ENST00000573615|ens|ENST00000572252	GO:0005515|GO:0007049|GO:0005737|GO:0005815|GO:0030496|GO:0005525|GO:0051301	GO:0005525=GTP binding|GO:0005515=protein binding	GO:0005815=microtubule organizing center|GO:0005737=cytoplasm|GO:0030496=midbody	GO:0051301=cell division|GO:0007049=cell cycle	NP1180451	ENST00000566517	Hs.632176	1731
Dec1	-0.298854	Compromised	0.298854	Compromised	0	-0.906039	Compromised	-0.477295	Compromised	-0.691667	0.200768	3.48	5.19	1.97	2.43	NM_017418	ref|Homo sapiens deleted in esophageal cancer 1 (DEC1), mRNA [NM_017418]	deleted in esophageal cancer 1	ref|NM_017418|ens|ENST00000374016|gb|BC107103|gb|AB022761	GO:0008285			GO:0008285=negative regulation of cell proliferation	THC2483720	ENST00000374016	Hs.148841	50514
MARCH2	0.00194168	Detected	-0.00194168	Detected	0	0.72429	Detected	0.329826	Detected	0.527058	0.11615	41.0513	40.3476	58.404	40.7167	NM_016496	ref|Homo sapiens membrane-associated ring finger (C3HC4) 2, E3 ubiquitin protein ligase (MARCH2), transcript variant 1, mRNA [NM_016496]	mitochondrial amidoxime reducing component 2	ref|NM_016496|ref|NM_001005415|ref|NM_001005416|ens|ENST00000381035	GO:0005739|GO:0043546|GO:0051410|GO:0042126|GO:0030170|GO:0008940|GO:0005743|GO:0005741|GO:0070062|GO:0055114|GO:0030151|GO:0005777	GO:0030170=pyridoxal phosphate binding|GO:0030151=molybdenum ion binding|GO:0008940=nitrate reductase activity|GO:0043546=molybdopterin cofactor binding	GO:0005777=peroxisome|GO:0070062=extracellular exosome|GO:0005739=mitochondrion|GO:0005741=mitochondrial outer membrane|GO:0005743=mitochondrial inner membrane	GO:0051410=detoxification of nitrogen compound|GO:0055114=oxidation-reduction process|GO:0042126=nitrate metabolic process	NP303386	ENST00000472447	Hs.369042	54996
SEPT2	0.00604153	Detected	-0.00604153	Detected	0	-0.144937	Detected	-0.235873	Detected	-0.190405	0.0534235	230.613	225.376	179.103	154.1	NM_001008491	ref|Homo sapiens septin 2 (SEPT2), transcript variant 1, mRNA [NM_001008491]	septin 2	ref|NM_001008491|ref|NM_001282973|ref|NM_006155|ref|NM_001282972	GO:0005515|GO:0060170|GO:0048471|GO:0045202|GO:0005634|GO:0015629|GO:0032154|GO:0031175|GO:0007224|GO:0032880|GO:0005737|GO:0000145|GO:0035869|GO:0030234|GO:0005938|GO:0070062|GO:0005819|GO:0005730|GO:0030496|GO:0002036|GO:0005525|GO:0042384|GO:0007067|GO:0032947|GO:0050790|GO:0000777|GO:0005654|GO:0051301	GO:0005525=GTP binding|GO:0032947=protein complex scaffold|GO:0005515=protein binding|GO:0030234=enzyme regulator activity	GO:0032154=cleavage furrow|GO:0000777=condensed chromosome kinetochore|GO:0045202=synapse|GO:0005730=nucleolus|GO:0005654=nucleoplasm|GO:0070062=extracellular exosome|GO:0015629=actin cytoskeleton|GO:0060170=ciliary membrane|GO:0000145=exocyst|GO:0005634=nucleus|GO:0048471=perinuclear region of cytoplasm|GO:0005737=cytoplasm|GO:0005938=cell cortex|GO:0005819=spindle|GO:0035869=ciliary transition …	GO:0051301=cell division|GO:0042384=cilium assembly|GO:0050790=regulation of catalytic activity|GO:0031175=neuron projection development|GO:0032880=regulation of protein localization|GO:0007224=smoothened signaling pathway|GO:0007067=mitotic nuclear division|GO:0002036=regulation of L-glutamate transport	THC2465756	ENST00000391973	Hs.721234	4735
MARCH3	-0.0570855	Detected	0.0570855	Detected	0	-0.145407	Detected	-0.285284	Detected	-0.215345	0.139815	63	67.2	51.1	42.5	NM_178450	ref|Homo sapiens membrane-associated ring finger (C3HC4) 3, E3 ubiquitin protein ligase (MARCH3), mRNA [NM_178450]	membrane-associated ring finger (C3HC4) 3, E3 ubiquitin protein ligase	ref|NM_178450|ens|ENST00000308660|gb|AK000103|tc|THC2613510	GO:0016567|GO:0031901|GO:0016874|GO:0008270|GO:0016021|GO:0005764|GO:0030659|GO:0006897|GO:0005768	GO:0008270=zinc ion binding|GO:0016874=ligase activity	GO:0031901=early endosome membrane|GO:0030659=cytoplasmic vesicle membrane|GO:0005768=endosome|GO:0016021=integral component of membrane|GO:0005764=lysosome	GO:0006897=endocytosis|GO:0016567=protein ubiquitination	THC2464429	ENST00000506088	Hs.132441	115123
SEPT3	0.547605	Detected	-0.547605	Compromised	0	-0.12521	Compromised	-0.292008	Compromised	-0.208609	0.742668	8.74	4.03163	4.72761	3.85927	NM_145733	ref|Homo sapiens septin 3 (SEPT3), transcript variant A, mRNA [NM_145733]	septin 3	ref|NM_145733|ens|ENST00000396426|gb|AB463248|gb|CU013459	GO:0003674|GO:0007049|GO:0005737|GO:0030054|GO:0045202|GO:0005856|GO:0005525|GO:0051301	GO:0005525=GTP binding|GO:0003674=molecular_function	GO:0005856=cytoskeleton|GO:0005737=cytoplasm|GO:0030054=cell junction|GO:0045202=synapse	GO:0051301=cell division|GO:0007049=cell cycle	THC2745156	ENST00000396426	Hs.120483	55964
MARCH4	-0.0217147	Compromised	0.0217147	Compromised	0	0.34174	Compromised	0.487901	Compromised	0.41482	0.0321571	1.92	1.95	2.13	2.16	NM_020814	ref|Homo sapiens membrane-associated ring finger (C3HC4) 4, E3 ubiquitin protein ligase (MARCH4), mRNA [NM_020814]	membrane-associated ring finger (C3HC4) 4, E3 ubiquitin protein ligase	ref|NM_020814|ens|ENST00000273067|gb|AB037820|gb|BC048793	GO:0005802|GO:0004842|GO:0016567|GO:0005795|GO:0000139|GO:0016874|GO:0008270|GO:0016021	GO:0004842=ubiquitin-protein transferase activity|GO:0008270=zinc ion binding|GO:0016874=ligase activity	GO:0005802=trans-Golgi network|GO:0016021=integral component of membrane|GO:0000139=Golgi membrane|GO:0005795=Golgi stack	GO:0016567=protein ubiquitination	THC2606222	ENST00000273067	Hs.170388	57574
SEPT4	0.0773001	Compromised	-0.0773001	Compromised	0	-0.48551	Compromised	0.146303	Compromised	-0.169604	0.654021	5.67	5.02	3.31	4.7	NM_004574	ref|Homo sapiens septin 4 (SEPT4), transcript variant 1, mRNA [NM_004574]	septin 4	ref|NM_004574|ref|NM_001256782|ref|NM_001256822|ref|NM_001198713	GO:0005515|GO:0043065|GO:0097227|GO:0003924|GO:0006915|GO:2001244|GO:0042981|GO:0005634|GO:0005525|GO:0030382|GO:0005739|GO:0007049|GO:0005198|GO:0007420|GO:0008152|GO:0031398|GO:0005856|GO:0048240|GO:0051301	GO:0005198=structural molecule activity|GO:0005525=GTP binding|GO:0005515=protein binding|GO:0003924=GTPase activity	GO:0005634=nucleus|GO:0005856=cytoskeleton|GO:0097227=sperm annulus|GO:0005739=mitochondrion	GO:0030382=sperm mitochondrion organization|GO:0008152=metabolic process|GO:0042981=regulation of apoptotic process|GO:0007420=brain development|GO:0007049=cell cycle|GO:0051301=cell division|GO:0048240=sperm capacitation|GO:0043065=positive regulation of apoptotic process|GO:0006915=apoptotic process|GO:0031398=positive regulation of protein ubiquitination|GO:2001244=positive regulation of intri…	THC2659794	ENST00000412945	Hs.287518	5414
MARCH5	-0.0514278	Detected	0.0514278	Detected	0	-0.459209	Detected	-0.243589	Detected	-0.351399	0.0987305	240	254	156	166	NM_017824	ref|Homo sapiens membrane-associated ring finger (C3HC4) 5 (MARCH5), mRNA [NM_017824]	membrane-associated ring finger (C3HC4) 5	ref|NM_017824|ens|ENST00000358935|ref|XM_005269923|gb|BC015480	GO:0000209|GO:0005515|GO:0004842|GO:0005783|GO:0016874|GO:0090344|GO:0005741|GO:0090141|GO:0090140|GO:0051865|GO:0051020|GO:0016020|GO:0070585|GO:0005789|GO:0008270|GO:0016021	GO:0008270=zinc ion binding|GO:0004842=ubiquitin-protein transferase activity|GO:0005515=protein binding|GO:0051020=GTPase binding|GO:0016874=ligase activity	GO:0005783=endoplasmic reticulum|GO:0005741=mitochondrial outer membrane|GO:0005789=endoplasmic reticulum membrane|GO:0016020=membrane|GO:0016021=integral component of membrane	GO:0090344=negative regulation of cell aging|GO:0000209=protein polyubiquitination|GO:0090140=regulation of mitochondrial fission|GO:0090141=positive regulation of mitochondrial fission|GO:0070585=protein localization to mitochondrion|GO:0051865=protein autoubiquitination	THC2641973	ENST00000358935	Hs.573490	54708
SEPT5	-0.682795	Compromised	0.682795	Compromised	0	-0.679926	Compromised	-0.46175	Compromised	-0.570838	0.495854	2.28	5.79	1.97	2.1	NM_001009939	ref|Homo sapiens septin 5 (SEPT5), transcript variant 2, mRNA [NM_001009939]	septin 5	ref|NM_001009939|ref|NM_002688|ens|ENST00000406172|ens|ENST00000383045	GO:0005515|GO:0016080|GO:0005886|GO:2000300|GO:0003924|GO:0005525|GO:0008021|GO:0000910|GO:0005198|GO:0043195|GO:0008152|GO:0017157|GO:0005856|GO:0005938	GO:0005198=structural molecule activity|GO:0005525=GTP binding|GO:0005515=protein binding|GO:0003924=GTPase activity	GO:0008021=synaptic vesicle|GO:0005886=plasma membrane|GO:0005856=cytoskeleton|GO:0043195=terminal bouton|GO:0005938=cell cortex	GO:0008152=metabolic process|GO:0000910=cytokinesis|GO:0016080=synaptic vesicle targeting|GO:2000300=regulation of synaptic vesicle exocytosis|GO:0017157=regulation of exocytosis	THC2503766	ENST00000406172	Hs.728762	5413
MARCH6	-0.0213263	Detected	0.0213263	Detected	0	0.30461	Detected	0.99732	Detected	0.650965	0.201488	623.014	632.408	673.414	997.434	NM_005885	ref|Homo sapiens membrane-associated ring finger (C3HC4) 6, E3 ubiquitin protein ligase (MARCH6), transcript variant 1, mRNA [NM_005885]	membrane-associated ring finger (C3HC4) 6, E3 ubiquitin protein ligase	ref|NM_005885|ref|NM_001270660|ref|NM_001270661|ens|ENST00000274140	GO:0004842|GO:0016020|GO:0016874|GO:0030176|GO:0008270|GO:0070936|GO:0019899|GO:0031624	GO:0004842=ubiquitin-protein transferase activity|GO:0008270=zinc ion binding|GO:0031624=ubiquitin conjugating enzyme binding|GO:0016874=ligase activity|GO:0019899=enzyme binding	GO:0016020=membrane|GO:0030176=integral component of endoplasmic reticulum membrane	GO:0070936=protein K48-linked ubiquitination	THC2468759	ENST00000274140	Hs.432862	10299
SEPT6	0.118033	Detected	-0.118033	Detected	0	-1.41561	Compromised	-1.99317	Compromised	-1.70439	0.0319082	11.7	9.79	3.48482	2.13991	NM_145802	ref|Homo sapiens septin 6 (SEPT6), transcript variant V, mRNA [NM_145802]	septin 6	ref|NM_145802|ref|NM_145800|ens|ENST00000460411|ens|ENST00000354228	GO:0005515|GO:0000910|GO:0005819|GO:0000777|GO:0030496|GO:0016032|GO:0043679|GO:0005525|GO:0032154|GO:0008021	GO:0005525=GTP binding|GO:0005515=protein binding	GO:0032154=cleavage furrow|GO:0008021=synaptic vesicle|GO:0005819=spindle|GO:0000777=condensed chromosome kinetochore|GO:0030496=midbody|GO:0043679=axon terminus	GO:0016032=viral process|GO:0000910=cytokinesis	NP391544	ENST00000354228	Hs.496666	23157
MARCH7	-0.0380013	Detected	0.0380013	Detected	0	-0.423999	Detected	0.000281095	Detected	-0.211859	0.429238	541	562	357	439	NM_022826	ref|Homo sapiens membrane-associated ring finger (C3HC4) 7, E3 ubiquitin protein ligase (MARCH7), transcript variant 2, mRNA [NM_022826]	membrane-associated ring finger (C3HC4) 7, E3 ubiquitin protein ligase	ref|NM_022826|ref|NM_001282805|ref|NM_001282807|ref|NM_001282806	GO:0016567|GO:0016874|GO:0008270	GO:0008270=zinc ion binding|GO:0016874=ligase activity		GO:0016567=protein ubiquitination	THC2462640	ENST00000409175	Hs.529272	64844
SEPT7	-0.0373642	Detected	0.0373642	Detected	0	-0.306506	Detected	-0.0985997	Detected	-0.202553	0.208152	886.255	919.844	634.171	671.225	NM_001011553	ref|Homo sapiens septin 7 (SEPT7), transcript variant 2, mRNA [NM_001011553]	septin 7	ref|NM_001011553|ref|NM_001788|ref|NM_001242956|ref|NR_027269	GO:0005515|GO:0005886|GO:0045202|GO:0005634|GO:0015629|GO:0032154|GO:0051291|GO:0042802|GO:0000910|GO:0005737|GO:0016324|GO:0015630|GO:0043679|GO:0005938|GO:0070062|GO:0001725|GO:0005930|GO:0005819|GO:0005730|GO:0030496|GO:0005525|GO:0007067|GO:0005198|GO:0016476|GO:0060271|GO:0000777	GO:0005198=structural molecule activity|GO:0005525=GTP binding|GO:0042802=identical protein binding|GO:0005515=protein binding	GO:0015630=microtubule cytoskeleton|GO:0032154=cleavage furrow|GO:0000777=condensed chromosome kinetochore|GO:0045202=synapse|GO:0005730=nucleolus|GO:0005930=axoneme|GO:0070062=extracellular exosome|GO:0001725=stress fiber|GO:0015629=actin cytoskeleton|GO:0005886=plasma membrane|GO:0043679=axon terminus|GO:0005634=nucleus|GO:0005737=cytoplasm|GO:0005938=cell cortex|GO:0005819=spindle|GO:0030496=m…	GO:0000910=cytokinesis|GO:0051291=protein heterooligomerization|GO:0016476=regulation of embryonic cell shape|GO:0060271=cilium morphogenesis|GO:0007067=mitotic nuclear division	THC2554020	ENST00000425198	Hs.191346	989
MARCH8	0.0761266	Detected	-0.0761266	Detected	0	0.856287	Detected	-0.0219679	Detected	0.41716	0.448077	29.577	26.229	43.8	21.8358	NM_001282866	ref|Homo sapiens membrane-associated ring finger (C3HC4) 8, E3 ubiquitin protein ligase (MARCH8), transcript variant 4, mRNA [NM_001282866]	membrane-associated ring finger (C3HC4) 8, E3 ubiquitin protein ligase	ref|NM_001282866|ref|NM_145021|ref|NM_001002266|ens|ENST00000476962	GO:0000209|GO:0004842|GO:0042289|GO:0002495|GO:0016874|GO:0005765|GO:0005764|GO:0031901|GO:0045347|GO:0008270|GO:0016021|GO:0030659|GO:0005768	GO:0008270=zinc ion binding|GO:0042289=MHC class II protein binding|GO:0004842=ubiquitin-protein transferase activity|GO:0016874=ligase activity	GO:0005765=lysosomal membrane|GO:0005764=lysosome|GO:0031901=early endosome membrane|GO:0030659=cytoplasmic vesicle membrane|GO:0005768=endosome|GO:0016021=integral component of membrane	GO:0000209=protein polyubiquitination|GO:0045347=negative regulation of MHC class II biosynthetic process|GO:0002495=antigen processing and presentation of peptide antigen via MHC class II	THC2471858	ENST00000451376	Hs.499489	220972
SEPT8	-0.656005	Detected	0.656005	Detected	0	0.51425	Detected	0.249795	Detected	0.382022	0.625683	58.8133	143.91	114.137	87.0747	NM_001098811	ref|Homo sapiens septin 8 (SEPT8), transcript variant 1, mRNA [NM_001098811]	septin 8	ref|NM_001098811|ens|ENST00000378719|ref|XM_005271931|ref|XM_005271927	GO:0005515|GO:0007049|GO:0005737|GO:0005856|GO:0005525	GO:0005525=GTP binding|GO:0005515=protein binding	GO:0005856=cytoskeleton|GO:0005737=cytoplasm	GO:0007049=cell cycle	THC2530391	ENST00000378719	Hs.522057	23176
MARCH9	-0.0105307	Detected	0.0105307	Detected	0	0.0162141	Detected	-0.126292	Detected	-0.0550387	0.524626	1810	1810	1590	1320	NM_138396	ref|Homo sapiens membrane-associated ring finger (C3HC4) 9 (MARCH9), mRNA [NM_138396]	membrane-associated ring finger (C3HC4) 9	ref|NM_138396|ens|ENST00000548358|ens|ENST00000266643|gb|BC036455	GO:0005802|GO:0016567|GO:0005795|GO:0000139|GO:0016874|GO:0008270|GO:0016021|GO:0005765	GO:0008270=zinc ion binding|GO:0016874=ligase activity	GO:0005802=trans-Golgi network|GO:0016021=integral component of membrane|GO:0000139=Golgi membrane|GO:0005795=Golgi stack|GO:0005765=lysosomal membrane	GO:0016567=protein ubiquitination	THC2478012	ENST00000548358	Hs.632709	92979
SEPT9	-0.00805664	Detected	0.00805616	Detected	-2.385e-07	0.0980234	Detected	-0.132385	Detected	-0.0171809	0.895382	2341.9	2333.88	2173.55	1697.79	NM_006640	ref|Homo sapiens septin 9 (SEPT9), transcript variant 3, mRNA [NM_006640]	septin 9	ref|NM_006640|ref|NM_001113492|ref|NM_001113493|ref|NM_001113494	GO:0005515|GO:0048471|GO:0007049|GO:0005737|GO:0001725|GO:0008152|GO:0005874|GO:0003924|GO:0015629|GO:0005525|GO:0051291|GO:0051301	GO:0005525=GTP binding|GO:0005515=protein binding|GO:0003924=GTPase activity	GO:0048471=perinuclear region of cytoplasm|GO:0005737=cytoplasm|GO:0001725=stress fiber|GO:0015629=actin cytoskeleton|GO:0005874=microtubule	GO:0051301=cell division|GO:0008152=metabolic process|GO:0051291=protein heterooligomerization|GO:0007049=cell cycle	THC2569011	ENST00000329047	Hs.440932	10801
MARCH10	0.305097	Compromised	-0.305097	Compromised	0	0.000610828	Compromised	1.51511	Compromised	0.75786	0.451254	2.85	1.84	1.99	5.21	NM_152598	ref|Homo sapiens membrane-associated ring finger (C3HC4) 10, E3 ubiquitin protein ligase (MARCH10), transcript variant 1, mRNA [NM_152598]	membrane-associated ring finger (C3HC4) 10, E3 ubiquitin protein ligase	ref|NM_152598|ref|NM_001100875|ref|NM_001288779|ens|ENST00000311269	GO:0016567|GO:0016874|GO:0008270	GO:0008270=zinc ion binding|GO:0016874=ligase activity		GO:0016567=protein ubiquitination	NP1159821	ENST00000311269	Hs.665663	162333
SEPT10	-0.0049603	Detected	0.0049603	Detected	0	-0.678169	Detected	-0.435919	Detected	-0.557044	0.0442411	1300	1290	703	762	NM_144710	ref|Homo sapiens septin 10 (SEPT10), transcript variant 1, mRNA [NM_144710]	septin 10	ref|NM_144710|ref|NM_178584|ref|NR_047585|ens|ENST00000397712	GO:0007049|GO:0005737|GO:0005856|GO:0005525|GO:0051301	GO:0005525=GTP binding	GO:0005856=cytoskeleton|GO:0005737=cytoplasm	GO:0051301=cell division|GO:0007049=cell cycle	NP1467265	ENST00000397712	Hs.469615	151011
MARCH11	0.328985	Compromised	-0.328985	Compromised	0	-0.0470719	Compromised	0.203239	Compromised	0.0780838	0.845032	3.01	1.88	2	2.18	NM_001102562	ref|Homo sapiens membrane-associated ring finger (C3HC4) 11 (MARCH11), mRNA [NM_001102562]	membrane-associated ring finger (C3HC4) 11	ref|NM_001102562|ens|ENST00000332432|gb|BC150514|gb|BC150513	GO:0016567|GO:0016874|GO:0008270|GO:0016021|GO:0030659	GO:0008270=zinc ion binding|GO:0016874=ligase activity	GO:0030659=cytoplasmic vesicle membrane|GO:0016021=integral component of membrane	GO:0016567=protein ubiquitination	THC2754016	ENST00000332432	Hs.662216	441061
SEPT11	-0.0124989	Detected	0.0124993	Detected	2.38e-07	0.0298052	Detected	0.229344	Detected	0.129575	0.326465	3660	3670	3250	3420	NM_018243	ref|Homo sapiens septin 11 (SEPT11), mRNA [NM_018243]	septin 11	ref|NM_018243|ens|ENST00000264893|ref|XM_005263120|ref|XM_006714259	GO:0005515|GO:0030424|GO:0007049|GO:0005737|GO:0001725|GO:0030054|GO:0043197|GO:0045202|GO:0005525|GO:0051291|GO:0070062|GO:0051301	GO:0005525=GTP binding|GO:0005515=protein binding	GO:0070062=extracellular exosome|GO:0005737=cytoplasm|GO:0001725=stress fiber|GO:0043197=dendritic spine|GO:0030054=cell junction|GO:0045202=synapse|GO:0030424=axon	GO:0051301=cell division|GO:0051291=protein heterooligomerization|GO:0007049=cell cycle	THC2545449	ENST00000264893	Hs.128199	55752
SEPT12	-0.205168	Detected	0.205168	Detected	1.2e-07	0.154145	Detected	0.706661	Detected	0.430403	0.337506	11.3	14.8	12.5	16.8	NM_144605	ref|Homo sapiens septin 12 (SEPT12), transcript variant 2, mRNA [NM_144605]	septin 12	ref|NM_144605|ref|NM_001154458|ens|ENST00000587603|ens|ENST00000268231	GO:0005515|GO:0031105|GO:0001725|GO:0048471|GO:0097227|GO:0005819|GO:0030496|GO:0005525|GO:0032154|GO:0042803|GO:0007049|GO:0015630|GO:0019003|GO:0035091|GO:0051301	GO:0042803=protein homodimerization activity|GO:0035091=phosphatidylinositol binding|GO:0005525=GTP binding|GO:0005515=protein binding|GO:0019003=GDP binding	GO:0015630=microtubule cytoskeleton|GO:0032154=cleavage furrow|GO:0048471=perinuclear region of cytoplasm|GO:0097227=sperm annulus|GO:0001725=stress fiber|GO:0005819=spindle|GO:0030496=midbody|GO:0031105=septin complex	GO:0007049=cell cycle|GO:0051301=cell division	NP1153851	ENST00000587603	Hs.126780	124404
SEPT14	0.00154805	Detected	-0.00154805	Detected	0	-0.00401139	Detected	-0.219044	Detected	-0.111528	0.408595	53.173	52.2901	45.6757	36.0603	NM_207366	ref|Homo sapiens septin 14 (SEPT14), mRNA [NM_207366]	septin 14	ref|NM_207366|ens|ENST00000388975|gb|AK126048|tc|THC2479910	GO:0005515|GO:0007049|GO:0005737|GO:0005856|GO:0005525|GO:0051301	GO:0005525=GTP binding|GO:0005515=protein binding	GO:0005856=cytoskeleton|GO:0005737=cytoplasm	GO:0051301=cell division|GO:0007049=cell cycle	THC2546252	ENST00000413839	Hs.453629	346288
SEPT15	0.000564575	Detected	-0.000565052	Detected	-2.38415e-07	0.137583	Detected	0.124659	Detected	0.131121	0.00243847	4992.88	4916.66	4734.4	4299.81	NM_004261	ref|Homo sapiens 15 kDa selenoprotein (SEP15), transcript variant 1, mRNA [NM_004261]	15 kDa selenoprotein	ref|NM_004261|ref|NM_203341|ens|ENST00000616787|ens|ENST00000611507	GO:0008430|GO:0051084|GO:0005788|GO:0070062	GO:0008430=selenium binding	GO:0005788=endoplasmic reticulum lumen|GO:0070062=extracellular exosome	GO:0051084='de novo' posttranslational protein folding	THC2470152	ENST00000616787	Hs.362728	9403
A_19_P00325768	0.0113297	Detected	-0.0113301	Detected	-2.385e-07	-0.0772877	Detected	-0.0177155	Detected	-0.0475016	0.274559	6030	5850	4890	4670	A_19_P00325768	Unknown
A_19_P00800244	-0.139393	Detected	0.139393	Detected	0	0.00927973	Detected	-0.541978	Detected	-0.266349	0.479391	36.3	43.4	34.7	21.7	A_19_P00800244	Unknown
A_19_P00802027	0.0500622	Detected	-0.0500622	Detected	0	-0.0282707	Detected	-0.0614405	Detected	-0.0448556	0.484609	63300	58200	51700	46300	A_19_P00802027	Unknown
A_19_P00803499	-0.00521994	Detected	0.00521994	Detected	0	-0.248302	Detected	-0.527706	Detected	-0.388004	0.109001	40.9	40.6	29.8	22.5	A_19_P00803499	Unknown
A_19_P00803675	-0.0489092	Compromised	0.0489092	Compromised	0	0.342585	Compromised	0.536632	Compromised	0.439608	0.0560059	1.83	1.93	2.07	2.17	A_19_P00803675	Unknown
A_19_P00804070	0.0839429	Compromised	-0.0839429	Compromised	0	-0.406574	Compromised	-0.19852	Compromised	-0.302547	0.151936	3.34	2.93	2.05	2.17	A_19_P00804070	Unknown
A_19_P00804120	-0.133611	Compromised	0.133611	Compromised	-2.35e-07	-0.287275	Compromised	0.29814	Compromised	0.00543214	0.988063	2.58	3.06	2	2.75	A_19_P00804120	Unknown
A_19_P00804924	-0.08286	Compromised	0.0828595	Compromised	-2.37e-07	-0.210942	Compromised	0.85302	Compromised	0.321039	0.611483	2.56	2.83	2.02	3.87	A_19_P00804924	Unknown
A_19_P00805651	-0.0244474	Detected	0.024447	Detected	-2.385e-07	0.288795	Detected	0.487247	Detected	0.388021	0.0628917	3080	3140	3300	3470	A_19_P00805651	Unknown
A_19_P00806158	-0.0292683	Detected	0.0292678	Detected	-2.385e-07	-0.132751	Detected	0.144643	Detected	0.00594569	0.970353	6080	6240	4880	5420	A_19_P00806158	Unknown
A_19_P00808758	0.106523	Detected	-0.106523	Detected	-2.4e-07	0.0126867	Detected	-0.26511	Detected	-0.126212	0.545782	9480	8060	7660	5790	A_19_P00808758	Unknown
A_19_P00808923	0.135993	Detected	-0.135993	Detected	-2.4e-07	-0.204823	Detected	-0.31716	Detected	-0.260992	0.218093	13600	11100	9260	7850	A_19_P00808923	Unknown
A_19_P00811234	-0.0540423	Detected	0.0540423	Detected	0	-0.14739	Detected	0.0151191	Detected	-0.0661354	0.56784	193	205	156	160	A_19_P00811234	Unknown
A_19_P00812701	0.0351536	Detected	-0.0351536	Detected	0	-0.425153	Detected	-0.51348	Detected	-0.469316	0.0141592	99.4	93.3	62.3	53.7	A_19_P00812701	Unknown
A_21_P0000465	-0.534547	Compromised	0.534547	Compromised	-2.25e-07	0.738053	Compromised	0.496304	Compromised	0.617179	0.377067	1.92	3.97	4	3.1	A_21_P0000465	Unknown
A_21_P0000467	-0.0405912	Compromised	0.0405912	Compromised	0	0.247883	Compromised	0.451869	Compromised	0.349876	0.0859389	1.88	1.96	1.98	2.09	A_21_P0000467	Unknown
A_21_P0000480	-0.0516443	Detected	0.0516443	Detected	0	0.236275	Detected	-0.283231	Detected	-0.0234783	0.937437	68.2	72.2	71.8	45.9	A_21_P0000480	Unknown
A_21_P0000520	0.0386012	Detected	-0.0386012	Detected	0	0.0279353	Detected	0.329996	Detected	0.178966	0.369734	48.6	45.4	41.6	47	A_21_P0000520	Unknown
A_21_P0000564	-0.347364	Compromised	0.347364	Compromised	0	0.376688	Compromised	0.0810304	Compromised	0.228859	0.606005	2.05	3.27	2.92	2.18	A_21_P0000564	Unknown
A_21_P0013913	0.111248	Detected	-0.111248	Detected	0	-0.123141	Detected	-0.13753	Detected	-0.130336	0.362837	20.6	17.4	15.1	13.7	A_21_P0013913	Unknown
A_21_P0013928	-0.243012	Detected	0.243012	Detected	0	0.507448	Detected	0.316165	Detected	0.411807	0.255542	21.3	29.4	30.9	24.8	A_21_P0013928	Unknown
A_21_P0013937	-0.172748	Detected	0.172748	Detected	0	-0.316691	Detected	-0.508623	Detected	-0.412657	0.172013	46	57.6	35.9	28.8	A_21_P0013937	Unknown
A_21_P0013942	0.20309	Compromised	-0.20309	Compromised	0	0.239693	Compromised	1.24922	Compromised	0.744455	0.304665	2.77	2.06	2.45	4.52	A_21_P0013942	Unknown
A_21_P0013943	-0.0510669	Compromised	0.0510664	Compromised	-2.375e-07	0.342722	Compromised	0.568241	Compromised	0.455481	0.0665664	1.73	1.83	1.96	2.1	A_21_P0013943	Unknown
A_21_P0013948	-0.298461	Detected	0.298461	Detected	-1.2e-07	0.85029	Detected	-0.759111	Compromised	0.0455898	0.962466	15.9	23.7	30.4	9.13	A_21_P0013948	Unknown
A_21_P0013949	0.393147	Compromised	-0.393147	Compromised	0	-0.207323	Compromised	-0.0542455	Compromised	-0.130784	0.775028	3.71	2.12	2.11	2.15	A_21_P0013949	Unknown
A_21_P0013954	-0.247066	Compromised	0.247066	Compromised	0	-0.0261989	Compromised	0.169493	Compromised	0.0716472	0.812724	2.01	2.79	2.02	2.12	A_21_P0013954	Unknown
A_21_P0013957	0.549055	Compromised	-0.549056	Compromised	-2.5e-07	0.952637	Compromised	1.04259	Compromised	0.997614	0.211859	3.91	1.8	4.46	4.35	A_21_P0013957	Unknown
A_21_P0013959	-0.0220113	Compromised	0.0220113	Compromised	0	0.331302	Compromised	0.491884	Compromised	0.411593	0.0385624	1.87	1.9	2.06	2.11	A_21_P0013959	Unknown
A_21_P0013962	-0.051527	Compromised	0.0515275	Compromised	2.385e-07	0.380952	Compromised	0.645098	Compromised	0.513025	0.0685985	1.71	1.81	1.99	2.19	A_21_P0013962	Unknown
A_21_P0013972	-0.0565901	Compromised	0.0565896	Compromised	-2.385e-07	0.335823	Compromised	0.516773	Compromised	0.426298	0.0573292	1.82	1.94	2.06	2.14	A_21_P0013972	Unknown
A_21_P0013988	0.360787	Compromised	-0.360786	Compromised	2.3e-07	0.237638	Compromised	-0.07374	Compromised	0.0819488	0.854111	8.5	5.08	6.73	4.97	A_21_P0013988	Unknown
A_21_P0013990	0.813637	Detected	-0.813636	Compromised	2.5e-07	-0.580452	Compromised	0.232208	Compromised	-0.174122	0.865842	12.1	3.86	3.97	6.39	A_21_P0013990	Unknown
A_21_P0013992	-0.893053	Compromised	0.893053	Compromised	2.25e-07	0.497051	Compromised	0.181934	Compromised	0.339493	0.744097	1.73	5.88	3.91	2.88	A_21_P0013992	Unknown
A_21_P0013994	0.21393	Detected	-0.21393	Detected	0	-0.880294	Detected	-1.5714	Compromised	-1.22585	0.0945811	35.9	26.3	14.5	8.23	A_21_P0013994	Unknown
A_21_P0013999	0.655072	Detected	-0.655072	Compromised	0	0.00291586	Detected	-0.663033	Compromised	-0.330059	0.697299	19.5	7.75	10.7	6.18	A_21_P0013999	Unknown
A_21_P0014005	-0.0493221	Compromised	0.0493226	Compromised	2.375e-07	1.19592	Compromised	1.06199	Compromised	1.12895	0.00538356	1.81	1.91	3.7	3.09	A_21_P0014005	Unknown
A_21_P0014013	-0.10451	Detected	0.10451	Detected	0	0.180558	Detected	0.0752156	Detected	0.127887	0.388572	84.8	96.6	89.1	75.9	A_21_P0014013	Unknown
A_21_P0014023	-0.0294085	Detected	0.029408	Detected	-2.385e-07	0.243192	Detected	0.172778	Detected	0.207985	0.0453624	2640	2710	2750	2400	A_21_P0014023	Unknown
A_21_P0014027	-0.0495319	Compromised	0.0495319	Compromised	0	0.294374	Compromised	0.512551	Compromised	0.403462	0.0780002	1.8	1.9	1.97	2.1	A_21_P0014027	Unknown
A_21_P0014037	-0.246183	Compromised	0.246183	Compromised	0	1.1047	Compromised	0.608808	Compromised	0.856752	0.133749	3.96	5.49	8.71	5.66	A_21_P0014037	Unknown
A_21_P0014040	0.0161221	Detected	-0.0161221	Detected	0	-0.181442	Detected	-0.419373	Detected	-0.300407	0.129418	102	98.3	76.7	59.6	A_21_P0014040	Unknown
A_21_P0014050	0.514548	Compromised	-0.514548	Compromised	0	-0.223274	Compromised	0.705517	Compromised	0.241122	0.761135	4.39	2.12	2.27	3.96	A_21_P0014050	Unknown
A_21_P0014052	-0.0327277	Compromised	0.0327277	Compromised	0	0.232641	Compromised	1.40148	Compromised	0.81706	0.29752	1.92	1.98	1.99	4.1	A_21_P0014052	Unknown
A_21_P0014064	-0.0487061	Compromised	0.0487061	Compromised	0	0.313864	Compromised	0.548782	Compromised	0.431323	0.0770059	1.84	1.94	2.04	2.2	A_21_P0014064	Unknown
A_21_P0014068	-0.0573177	Compromised	0.0573177	Compromised	0	0.311364	Compromised	0.403559	Compromised	0.357461	0.0398286	1.94	2.07	2.16	2.11	A_21_P0014068	Unknown
A_21_P0014095	-0.0439148	Compromised	0.0439153	Compromised	2.375e-07	0.236561	Compromised	0.45384	Compromised	0.3452	0.0984983	1.9	1.99	1.99	2.12	A_21_P0014095	Unknown
A_21_P0014104	-0.0495319	Compromised	0.0495319	Compromised	0	0.308947	Compromised	0.559856	Compromised	0.434401	0.084383	1.8	1.9	1.99	2.17	A_21_P0014104	Unknown
A_21_P0014121	-0.0512953	Compromised	0.0512958	Compromised	2.385e-07	0.372771	Compromised	0.617018	Compromised	0.494895	0.0647561	1.72	1.82	1.99	2.16	A_21_P0014121	Unknown
A_21_P0014122	-0.0369568	Detected	0.0369565	Detected	-1.185e-07	-0.485049	Compromised	0.396515	Detected	-0.0442667	0.929412	13.4	13.9	8.47	14.3	A_21_P0014122	Unknown
A_21_P0014126	-0.245976	Detected	0.245976	Detected	0	-0.114732	Detected	-0.352595	Detected	-0.233663	0.48253	34.2	47.4	32.3	25.1	A_21_P0014126	Unknown
A_21_P0014154	-0.0501752	Compromised	0.0501752	Compromised	0	0.339782	Compromised	0.536155	Compromised	0.437968	0.0579309	1.77	1.87	2	2.1	A_21_P0014154	Unknown
A_21_P0014163	-0.051527	Compromised	0.0515275	Compromised	2.385e-07	0.380952	Compromised	0.638495	Compromised	0.509723	0.0667166	1.71	1.81	1.99	2.18	A_21_P0014163	Unknown
A_21_P0014169	-0.224865	Compromised	0.224866	Compromised	2.35e-07	0.0687656	Compromised	0.7633	Compromised	0.416033	0.420498	4.74	6.38	5.01	7.43	A_21_P0014169	Unknown
A_21_P0014178	-0.0463076	Compromised	0.0463071	Compromised	-2.385e-07	0.358005	Compromised	0.546876	Compromised	0.452441	0.0500213	1.77	1.86	2.02	2.11	A_21_P0014178	Unknown
A_21_P0014192	0.0382273	Detected	-0.0382273	Detected	0	-0.0865901	Detected	-0.37485	Detected	-0.23072	0.261866	153	143	121	90.8	A_21_P0014192	Unknown
A_21_P0014193	0.332732	Compromised	-0.332732	Compromised	1.2e-07	0.471585	Compromised	0.024508	Compromised	0.248047	0.599135	8.9	5.53	8.45	5.68	A_21_P0014193	Unknown
A_21_P0014203	0.104078	Detected	-0.104078	Compromised	1.18e-07	0.330496	Detected	0.689679	Detected	0.510087	0.133276	11.3	9.64	11.4	13.4	A_21_P0014203	Unknown
A_21_P0014212	0.14075	Compromised	-0.14075	Compromised	0	-0.859296	Compromised	-1.35315	Compromised	-1.10622	0.0601219	7.77	6.3	3.35	2.18	A_21_P0014212	Unknown
A_21_P0014213	-0.139197	Detected	0.139197	Detected	0	0.435182	Detected	-0.145104	Detected	0.145039	0.696351	16.9	20.2	21.7	13.3	A_21_P0014213	Unknown
A_21_P0014219	-0.0193455	Detected	0.0193455	Detected	0	-0.378824	Detected	-0.582487	Detected	-0.480655	0.0434929	48.8	49.4	32.8	26.1	A_21_P0014219	Unknown
A_21_P0014240	-0.476974	Compromised	0.476974	Compromised	0	-0.104721	Compromised	-0.0251727	Compromised	-0.0649466	0.904489	1.98	3.78	2.21	2.14	A_21_P0014240	Unknown
A_21_P0014255	-0.357906	Detected	0.357906	Detected	0	-0.52607	Detected	-2.24913	Compromised	-1.3876	0.275293	21.5	34.8	16.5	4.58	A_21_P0014255	Unknown
A_21_P0014259	-0.222435	Detected	0.222435	Detected	0	0.659783	Detected	0.850699	Detected	0.755241	0.0891899	24.6	33	39.1	40.9	A_21_P0014259	Unknown
A_21_P0014263	-0.0481095	Compromised	0.0481095	Compromised	0	0.319143	Compromised	0.472607	Compromised	0.395875	0.0485579	1.87	1.97	2.08	2.12	A_21_P0014263	Unknown
A_21_P0014264	-0.0568552	Compromised	0.0568552	Compromised	0	0.310326	Compromised	0.396045	Compromised	0.353186	0.0383194	1.96	2.09	2.18	2.12	A_21_P0014264	Unknown
A_21_P0014265	-0.0326147	Compromised	0.0326142	Compromised	-2.39e-07	0.22526	Compromised	0.428864	Compromised	0.327062	0.0922795	1.93	1.99	1.99	2.1	A_21_P0014265	Unknown
A_21_P0014294	0.620987	Detected	-0.620986	Compromised	1.2e-07	-1.28959	Compromised	-1.59706	Compromised	-1.44333	0.152699	12.6	5.25	2.89	2.14	A_21_P0014294	Unknown
A_21_P0014305	-0.0467873	Compromised	0.0467868	Compromised	-2.385e-07	0.335191	Compromised	0.454541	Compromised	0.394866	0.0349566	1.94	2.04	2.18	2.17	A_21_P0014305	Unknown
A_21_P0014320	0.457044	Compromised	-0.457044	Compromised	-2.35e-07	-0.142837	Compromised	0.121974	Compromised	-0.010431	0.984501	3.48	1.82	1.98	2.18	A_21_P0014320	Unknown
A_21_P0014324	0.0619271	Detected	-0.0619271	Detected	0	0.0697982	Detected	-0.214654	Detected	-0.072428	0.686492	72.2	65.3	62.6	47.1	A_21_P0014324	Unknown
A_21_P0014345	0.0276155	Detected	-0.0276155	Detected	0	0.143857	Detected	-0.521126	Detected	-0.188635	0.628776	79.6	75.5	74.4	43	A_21_P0014345	Unknown
A_21_P0014374	-0.044796	Compromised	0.0447965	Compromised	2.385e-07	0.259581	Compromised	0.463952	Compromised	0.361767	0.0833925	1.85	1.94	1.97	2.08	A_21_P0014374	Unknown
A_21_P0014382	-0.209723	Compromised	0.209724	Compromised	2.4e-07	-0.317945	Compromised	-0.0837798	Compromised	-0.200862	0.491007	6.1	8.04	4.88	5.26	A_21_P0014382	Unknown
A_21_P0014384	-0.0542622	Compromised	0.0542622	Compromised	0	0.314723	Compromised	0.540242	Compromised	0.427482	0.0760442	1.76	1.87	1.96	2.1	A_21_P0014384	Unknown
A_21_P0014386	0.455113	Compromised	-0.455113	Compromised	0	0.207817	Compromised	0.709382	Compromised	0.458599	0.47058	5.74	3.01	4.17	5.41	A_21_P0014386	Unknown
A_21_P0014391	0.104947	Detected	-0.104946	Detected	1.175e-07	-0.0488029	Detected	-0.312387	Compromised	-0.180595	0.395934	16.9	14.4	13.1	10	A_21_P0014391	Unknown
A_21_P0014394	0.138293	Detected	-0.138293	Compromised	0	-1.67943	Compromised	-1.49125	Compromised	-1.58534	0.0109493	9.28	7.55	2.27	2.37	A_21_P0014394	Unknown
A_21_P0014413	-0.541463	Compromised	0.541463	Compromised	0	-0.262333	Compromised	0.00566912	Compromised	-0.128332	0.839428	1.94	4.05	2.03	2.24	A_21_P0014413	Unknown
A_21_P0014414	-0.446071	Compromised	0.446071	Compromised	0	-0.0572772	Compromised	-0.614321	Compromised	-0.335799	0.588486	3.1	5.67	3.5	2.18	A_21_P0014414	Unknown
A_21_P0014417	-0.0451617	Compromised	0.0451622	Compromised	2.38e-07	0.360204	Compromised	0.547013	Compromised	0.453609	0.048536	1.83	1.92	2.09	2.18	A_21_P0014417	Unknown
A_21_P0014418	-0.377493	Compromised	0.377493	Compromised	2.4e-07	0.00782538	Compromised	0.160526	Compromised	0.0841756	0.847268	1.9	3.16	2.14	2.18	A_21_P0014418	Unknown
A_21_P0014420	0.00258517	Detected	-0.00258517	Detected	0	-0.27617	Compromised	-0.673406	Compromised	-0.474788	0.139356	11.1	10.9	7.89	5.49	A_21_P0014420	Unknown
A_21_P0014433	-0.457342	Compromised	0.457342	Detected	0	0.32806	Compromised	0.644726	Compromised	0.486393	0.420731	6.19	11.5	9.2	10.5	A_21_P0014433	Unknown
A_21_P0014438	-0.121158	Compromised	0.121157	Compromised	-2.38e-07	0.250915	Compromised	0.493474	Compromised	0.372195	0.162082	1.81	2.11	2.02	2.19	A_21_P0014438	Unknown
A_21_P0014447	0.962939	Compromised	-0.962939	Compromised	0	0.013978	Compromised	0.319164	Compromised	0.166571	0.880063	6.94	1.8	3.1	3.51	A_21_P0014447	Unknown
A_21_P0014457	-0.0473423	Compromised	0.0473418	Compromised	-2.38e-07	0.310035	Compromised	0.429164	Compromised	0.3696	0.0398628	1.91	2.01	2.11	2.1	A_21_P0014457	Unknown
A_21_P0014467	-0.0639882	Compromised	0.0639882	Compromised	0	0.370891	Compromised	0.623015	Compromised	0.496953	0.0722651	1.69	1.82	1.97	2.15	A_21_P0014467	Unknown
A_21_P0014468	-0.123803	Compromised	0.123803	Compromised	2.4e-07	-0.734178	Compromised	0.0344834	Compromised	-0.349847	0.477588	3.47	4.06	1.96	3.06	A_21_P0014468	Unknown
A_21_P0014484	-0.242751	Compromised	0.24275	Compromised	-2.35e-07	-0.937413	Compromised	0.748658	Compromised	-0.0943777	0.92415	3.66	5.05	1.95	5.75	A_21_P0014484	Unknown
A_21_P0014492	-0.0209854	Detected	0.0209854	Detected	0	0.171505	Detected	0.893098	Detected	0.532302	0.278678	1370	1390	1350	2040	A_21_P0014492	Unknown
A_21_P0014500	-0.0597324	Compromised	0.0597324	Compromised	0	0.359293	Compromised	0.605277	Compromised	0.482285	0.0718225	1.7	1.82	1.96	2.13	A_21_P0014500	Unknown
A_21_P0014506	-0.0357175	Compromised	0.0357175	Compromised	0	0.192562	Compromised	0.396166	Compromised	0.294364	0.112172	1.97	2.04	1.99	2.1	A_21_P0014506	Unknown
A_21_P0014523	-0.0537848	Compromised	0.0537853	Compromised	2.385e-07	0.987969	Compromised	0.558365	Compromised	0.773167	0.0731391	1.78	1.89	3.16	2.15	A_21_P0014523	Unknown
A_21_P0014524	-0.0526371	Compromised	0.0526371	Compromised	0	0.338857	Compromised	0.526241	Compromised	0.432549	0.0565418	1.83	1.94	2.07	2.16	A_21_P0014524	Unknown
A_21_P0014532	-1.60841	Compromised	1.60841	Detected	2e-07	-1.3947	Compromised	-1.20613	Compromised	-1.30042	0.504322	2.03	18.6	2.03	2.12	A_21_P0014532	Unknown
A_21_P0014540	-0.0479145	Compromised	0.0479145	Compromised	0	0.24056	Compromised	0.451432	Compromised	0.345996	0.0961519	1.88	1.98	1.98	2.1	A_21_P0014540	Unknown
A_21_P0014541	-0.840591	Compromised	0.840591	Compromised	2.25e-07	-0.494298	Compromised	-0.266435	Compromised	-0.380366	0.697762	1.87	5.91	2.05	2.2	A_21_P0014541	Unknown
A_21_P0014546	0.0153003	Compromised	-0.0153003	Compromised	0	0.257719	Compromised	0.493153	Compromised	0.375436	0.0871088	1.99	1.92	2.03	2.19	A_21_P0014546	Unknown
A_21_P0014581	-0.836569	Compromised	0.836569	Compromised	-1e-07	-1.17388	Compromised	-0.519963	Compromised	-0.84692	0.445256	3.15	9.9	2.15	3.1	A_21_P0014581	Unknown
A_21_P0014590	-0.412795	Compromised	0.412796	Compromised	2.35e-07	0.28528	Compromised	-1.48814	Compromised	-0.601431	0.601258	5.84	10.2	8.17	2.19	A_21_P0014590	Unknown
A_21_P0014605	0.815165	Compromised	-0.815164	Compromised	2.35e-07	0.679636	Compromised	1.41789	Compromised	1.04876	0.361909	6	1.91	4.71	7.2	A_21_P0014605	Unknown
A_21_P0014607	0.240344	Detected	-0.240344	Detected	0	-0.597348	Compromised	-1.65443	Compromised	-1.12589	0.192048	16	11.3	7.72	3.4	A_21_P0014607	Unknown
A_21_P0014610	0.539771	Compromised	-0.539772	Compromised	-2.3e-07	-0.0510764	Compromised	0.0551887	Compromised	0.00205612	0.997319	3.86	1.8	2.21	2.18	A_21_P0014610	Unknown
A_21_P0014613	-0.0593362	Compromised	0.0593362	Compromised	0	0.324296	Compromised	0.398049	Compromised	0.361172	0.0354385	2	2.14	2.25	2.17	A_21_P0014613	Unknown
A_21_P0014614	0.646524	Compromised	-0.646524	Compromised	0	-0.84133	Compromised	-0.623604	Compromised	-0.732467	0.38011	6.44	2.59	1.98	2.11	A_21_P0014614	Unknown
A_21_P0014630	-0.0453482	Compromised	0.0453477	Compromised	-2.385e-07	0.275274	Compromised	0.486987	Compromised	0.381131	0.0804363	1.82	1.91	1.96	2.08	A_21_P0014630	Unknown
A_21_P0014634	0.193057	Compromised	-0.193057	Compromised	0	1.26719	Compromised	0.350203	Compromised	0.808696	0.245547	2.44	1.84	4.43	2.15	A_21_P0014634	Unknown
A_21_P0014654	-0.0586386	Compromised	0.0586381	Compromised	-2.385e-07	0.341481	Compromised	0.559207	Compromised	0.450344	0.0678102	1.74	1.86	1.98	2.11	A_21_P0014654	Unknown
A_21_P0014656	0.0385809	Compromised	-0.0385814	Compromised	-2.38e-07	-0.845936	Compromised	-0.1839	Compromised	-0.514918	0.26234	4.71	4.4	2.2	3.19	A_21_P0014656	Unknown
A_21_P0014667	-0.0444384	Compromised	0.0444388	Compromised	2.39e-07	0.301855	Compromised	0.529717	Compromised	0.415786	0.0766882	1.87	1.96	2.05	2.2	A_21_P0014667	Unknown
A_21_P0014673	-0.0105305	Compromised	0.0105309	Compromised	2.385e-07	0.25093	Compromised	0.455269	Compromised	0.353099	0.075194	2.08	2.08	2.15	2.27	A_21_P0014673	Unknown
A_21_P0014680	-0.0442624	Compromised	0.0442619	Compromised	-2.39e-07	0.244212	Compromised	0.448198	Compromised	0.346205	0.0895054	1.88	1.97	1.98	2.09	A_21_P0014680	Unknown
A_21_P0014690	0.00481796	Compromised	-0.00481749	Compromised	2.383e-07	0.145095	Compromised	-0.97742	Compromised	-0.416162	0.53566	6.65	6.51	6.32	2.66	A_21_P0014690	Unknown
A_21_P0014692	0.0668304	Detected	-0.0668306	Detected	-1.175e-07	0.139361	Detected	0.589967	Detected	0.364664	0.260903	11.8	10.6	10.7	13.4	A_21_P0014692	Unknown
A_21_P0014698	-0.499844	Compromised	0.499844	Compromised	2.35e-07	0.696074	Compromised	-0.0710278	Compromised	0.312523	0.66902	2.04	4.02	4.03	2.17	A_21_P0014698	Unknown
A_21_P0014717	-0.358851	Detected	0.358851	Detected	0	0.0242503	Compromised	-0.171695	Compromised	-0.0737222	0.861217	9.07	14.7	10.2	8.16	A_21_P0014717	Unknown
A_21_P0014731	1.23376	Detected	-1.23376	Compromised	-2e-07	-0.0264664	Compromised	0.306211	Compromised	0.139872	0.920803	11	1.96	3.96	4.57	A_21_P0014731	Unknown
A_21_P0014734	-0.488469	Compromised	0.48847	Compromised	2.4e-07	-0.612712	Compromised	-0.148779	Compromised	-0.380746	0.554306	2.49	4.83	1.97	2.49	A_21_P0014734	Unknown
A_21_P0014743	-0.366629	Compromised	0.36663	Compromised	2.4e-07	-0.00707149	Compromised	0.193259	Compromised	0.0930939	0.829342	1.88	3.08	2.08	2.19	A_21_P0014743	Unknown
A_21_P0014748	0.0811598	Detected	-0.0811598	Detected	0	-0.197465	Detected	0.188859	Detected	-0.00430298	0.985479	37.7	33.2	26.8	32.1	A_21_P0014748	Unknown
A_21_P0014749	-0.042429	Detected	0.042429	Detected	0	0.717351	Detected	0.925067	Detected	0.821209	0.0181571	37.6	39.3	54.9	58.1	A_21_P0014749	Unknown
A_21_P0014750	0.303013	Compromised	-0.303013	Compromised	0	0.0271358	Compromised	0.291947	Compromised	0.159541	0.677117	2.78	1.8	1.98	2.18	A_21_P0014750	Unknown
A_21_P0014751	0.112382	Detected	-0.112382	Detected	0	-0.147842	Detected	-0.176834	Detected	-0.162338	0.288328	30	25.3	21.6	19.4	A_21_P0014751	Unknown
A_21_P0014752	-0.0497441	Compromised	0.0497437	Compromised	-2.39e-07	1.39782	Compromised	0.561018	Compromised	0.979421	0.145689	1.79	1.89	4.21	2.16	A_21_P0014752	Unknown
A_21_P0014754	0.287197	Compromised	-0.287197	Compromised	0	0.149491	Compromised	-0.109498	Compromised	0.0199966	0.955163	8.28	5.48	6.49	4.97	A_21_P0014754	Unknown
A_21_P0014755	-0.607442	Detected	0.607442	Detected	0	-0.606729	Detected	-0.395857	Detected	-0.501293	0.501565	15.3	35	13.2	14	A_21_P0014755	Unknown
A_21_P0014758	0.0933595	Compromised	-0.0933595	Compromised	0	-1.00196	Compromised	-1.17983	Compromised	-1.09089	0.0136839	8.35	7.23	3.37	2.73	A_21_P0014758	Unknown
A_21_P0014763	-0.456151	Compromised	0.456151	Compromised	-1.25e-07	-0.43082	Compromised	-1.28788	Compromised	-0.859352	0.303412	4.82	8.94	4.23	2.14	A_21_P0014763	Unknown
A_21_P0014766	-0.171002	Detected	0.171002	Detected	0	-0.325504	Detected	0.212336	Detected	-0.0565839	0.875428	29.3	36.6	22.7	30.2	A_21_P0014766	Unknown
A_21_P0014769	-0.0732966	Compromised	0.0732961	Compromised	-2.4e-07	0.350258	Compromised	0.405221	Compromised	0.37774	0.0403621	1.98	2.16	2.29	2.18	A_21_P0014769	Unknown
A_21_P0014770	0.223779	Compromised	-0.223779	Compromised	0	0.0956969	Compromised	0.331653	Compromised	0.213675	0.487235	2.56	1.85	2.02	2.18	A_21_P0014770	Unknown
A_21_P0014771	-0.0527976	Detected	0.0527976	Detected	0	-0.0604465	Detected	0.714314	Detected	0.326934	0.491019	116	123	99.5	156	A_21_P0014771	Unknown
A_21_P0014772	-0.0557385	Compromised	0.0557385	Compromised	0	0.333466	Compromised	0.407687	Compromised	0.370576	0.031135	2.01	2.14	2.27	2.19	A_21_P0014772	Unknown
A_21_P0014774	-0.455198	Compromised	0.455197	Compromised	-2.35e-07	-0.493609	Compromised	-0.283152	Compromised	-0.388381	0.493252	2.37	4.39	1.99	2.11	A_21_P0014774	Unknown
A_21_P0014777	0.0850568	Compromised	-0.0850573	Compromised	-2.4e-07	-1.51788	Compromised	-1.32116	Compromised	-1.41952	0.00828728	7.01	6.14	1.99	2.09	A_21_P0014777	Unknown
A_21_P0014780	-0.280044	Compromised	0.280044	Compromised	-2.4e-07	-1.29285	Compromised	-0.502379	Compromised	-0.897613	0.205054	4.68	6.8	2	3.17	A_21_P0014780	Unknown
A_21_P0014787	0.0127406	Compromised	-0.0127406	Compromised	0	1.39891	Compromised	1.63254	Compromised	1.51573	0.00595626	1.89	1.83	4.26	4.59	A_21_P0014787	Unknown
A_21_P0014790	0.152908	Detected	-0.152908	Detected	0	-0.2085	Detected	-0.237795	Detected	-0.223147	0.283463	36.5	29.1	24.5	22	A_21_P0014790	Unknown
A_21_P0014792	-0.185106	Detected	0.185106	Detected	0	-0.432979	Detected	0.019655	Detected	-0.206662	0.552923	16.8	21.4	12.2	15.3	A_21_P0014792	Unknown
A_21_P0014799	-0.0784724	Detected	0.0784724	Detected	0	0.254816	Detected	0.491224	Detected	0.37302	0.119324	16.2	17.8	17.6	19	A_21_P0014799	Unknown
A_21_P0014808	0.149314	Detected	-0.149314	Detected	0	-0.085252	Detected	-0.473843	Detected	-0.279547	0.37214	805	645	590	413	A_21_P0014808	Unknown
A_21_P0014811	0.545574	Compromised	-0.545574	Compromised	2.5e-07	-0.418023	Compromised	-0.17145	Compromised	-0.294737	0.650843	4.41	2.04	1.95	2.12	A_21_P0014811	Unknown
A_21_P0014819	0.267229	Detected	-0.267229	Detected	0	-1.04003	Compromised	-1.63897	Compromised	-1.3395	0.0792562	19.4	13.2	6.76	4.09	A_21_P0014819	Unknown
A_21_P0014821	-0.278907	Compromised	0.278907	Compromised	0	0.900529	Compromised	0.825919	Compromised	0.863224	0.091855	2.13	3.09	4.16	3.62	A_21_P0014821	Unknown
A_21_P0014826	0.0766516	Compromised	-0.0766511	Compromised	2.35e-07	-0.445985	Compromised	-1.47062	Compromised	-0.958304	0.205551	7.73	6.85	4.64	2.09	A_21_P0014826	Unknown
A_21_P0014828	-0.823571	Compromised	0.823571	Compromised	0	0.0973539	Compromised	0.015151	Compromised	0.0562525	0.951818	1.96	6.05	3.2	2.77	A_21_P0014828	Unknown
A_21_P0014834	-0.180776	Detected	0.180776	Detected	0	0.123444	Detected	1.01439	Detected	0.568916	0.358259	27.8	35.2	29.6	50.3	A_21_P0014834	Unknown
A_21_P0014845	-0.857738	Compromised	0.857738	Compromised	0	-0.636941	Compromised	-0.455463	Compromised	-0.546202	0.591319	2.03	6.57	2.04	2.12	A_21_P0014845	Unknown
A_21_P0014849	-0.106853	Detected	0.106853	Detected	0	-0.0497367	Detected	0.0502851	Detected	0.00027418	0.998357	87.5	100	78.5	77.1	A_21_P0014849	Unknown
A_21_P0014850	0.0441318	Compromised	-0.0441318	Compromised	0	-1.12809	Compromised	-0.86731	Compromised	-0.9977	0.0185098	5.07	4.7	1.94	2.13	A_21_P0014850	Unknown
A_21_P0014854	0.346374	Compromised	-0.346373	Compromised	2.4e-07	0.853148	Compromised	1.2303	Compromised	1.04173	0.118404	5.15	3.14	6.31	7.51	A_21_P0014854	Unknown
A_21_P0014855	0.269391	Detected	-0.269392	Compromised	-1.2e-07	-0.231865	Compromised	0.919881	Detected	0.344008	0.642654	9.11	6.18	5.55	11.3	A_21_P0014855	Unknown
A_21_P0014859	-0.250192	Compromised	0.250192	Compromised	2.35e-07	-0.0223403	Compromised	0.192347	Compromised	0.0850034	0.784413	2.03	2.83	2.05	2.18	A_21_P0014859	Unknown
A_21_P0014862	-0.0181744	Detected	0.0181744	Detected	0	0.482068	Detected	0.444804	Detected	0.463436	0.00313946	751	759	916	818	A_21_P0014862	Unknown
A_21_P0014864	-0.0267696	Detected	0.0267696	Detected	0	0.480802	Detected	0.315445	Detected	0.398123	0.044492	57.1	58.4	70	57.2	A_21_P0014864	Unknown
A_21_P0014867	-0.529665	Compromised	0.529665	Compromised	0	-0.196906	Compromised	0.663183	Compromised	0.233139	0.765131	1.86	3.82	2.02	3.36	A_21_P0014867	Unknown
A_21_P0014875	0.156546	Compromised	-0.156547	Compromised	-2.4e-07	0.103562	Compromised	0.335413	Compromised	0.219488	0.376862	2.37	1.88	1.97	2.12	A_21_P0014875	Unknown
A_21_P0014876	0.0760658	Detected	-0.0760658	Detected	0	-0.105813	Detected	-0.514166	Detected	-0.309989	0.290777	221	196	168	116	A_21_P0014876	Unknown
A_21_P0014877	-0.214066	Detected	0.214066	Detected	0	0.367849	Detected	0.16944	Detected	0.268645	0.372869	22.7	30.1	29.3	23.4	A_21_P0014877	Unknown
A_21_P0014880	0.00119901	Detected	-0.00119901	Detected	0	0.0244749	Detected	0.52283	Detected	0.273652	0.386663	186	183	163	211	A_21_P0014880	Unknown
A_21_P0014882	-0.00696874	Detected	0.00696874	Detected	0	0.405588	Detected	0.110329	Detected	0.257959	0.223033	20.3	20.2	23.3	17.4	A_21_P0014882	Unknown
A_21_P0014893	-0.355361	Compromised	0.355361	Detected	0	-0.0628347	Compromised	-0.608411	Compromised	-0.335623	0.531881	8.37	13.5	8.84	5.55	A_21_P0014893	Unknown
A_21_P0014894	-0.0330746	Detected	0.0330746	Detected	0	0.0446546	Detected	0.153764	Detected	0.0992093	0.260183	18.9	19.5	17.2	17	A_21_P0014894	Unknown
A_21_P0014897	-0.0832777	Compromised	0.0832782	Compromised	2.4e-07	-0.38879	Compromised	0.270263	Compromised	-0.0592637	0.877633	3.11	3.44	2.17	3.14	A_21_P0014897	Unknown
A_21_P0014903	-0.0837736	Detected	0.0837736	Detected	0	0.475889	Detected	0.980717	Detected	0.728303	0.111487	26.2	29	33.3	43.3	A_21_P0014903	Unknown
A_21_P0014905	-0.308336	Compromised	0.308336	Compromised	0	0.77984	Compromised	0.287694	Compromised	0.533767	0.30869	1.8	2.72	3.3	2.15	A_21_P0014905	Unknown
A_21_P0014907	-0.276728	Compromised	0.276728	Compromised	0	0.11323	Compromised	0.780232	Compromised	0.446731	0.410956	1.77	2.56	2	2.91	A_21_P0014907	Unknown
A_21_P0014911	-0.0383675	Detected	0.0383675	Detected	0	0.122347	Detected	0.370585	Detected	0.246466	0.19825	305	317	294	320	A_21_P0014911	Unknown
A_21_P0014912	-0.627763	Compromised	0.627763	Detected	0	0.124085	Compromised	-0.131954	Compromised	-0.0039345	0.995658	5.95	14	8.64	6.63	A_21_P0014912	Unknown
A_21_P0014925	-0.0517616	Compromised	0.0517616	Compromised	0	0.381911	Compromised	0.653325	Compromised	0.517618	0.0705101	1.7	1.8	1.98	2.19	A_21_P0014925	Unknown
A_21_P0014931	-0.051527	Compromised	0.0515275	Compromised	2.385e-07	0.366379	Compromised	0.625198	Compromised	0.495789	0.070667	1.71	1.81	1.97	2.16	A_21_P0014931	Unknown
A_21_P0014936	0.221253	Compromised	-0.221253	Compromised	-2.4e-07	0.0597482	Compromised	0.302307	Compromised	0.181028	0.547564	2.62	1.9	2.02	2.19	A_21_P0014936	Unknown
A_21_P0014946	-0.268578	Compromised	0.268579	Compromised	2.4e-07	-0.141145	Compromised	0.393801	Compromised	0.126328	0.77062	3.79	5.42	3.57	4.74	A_21_P0014946	Unknown
A_22_P00005983	-0.527416	Compromised	0.527416	Compromised	-2.25e-07	1.62819	Compromised	-0.0433364	Compromised	0.792426	0.506779	1.9	3.89	7.3	2.1	A_22_P00005983	Unknown
A_23_P90470	-0.0457253	Detected	0.0457253	Detected	0	0.382106	Detected	0.482999	Detected	0.432553	0.0238917	100	105	116	114	A_23_P90470	Unknown
A_24_P229726	-0.138396	Compromised	0.138395	Compromised	-2.4e-07	-0.0242243	Compromised	-0.423561	Compromised	-0.223892	0.454034	3.3	3.94	3.08	2.14	A_24_P229726	Unknown
A_24_P246636	-0.0512953	Compromised	0.0512958	Compromised	2.385e-07	0.365503	Compromised	0.630314	Compromised	0.497909	0.072585	1.72	1.82	1.98	2.18	A_24_P246636	Unknown
A_24_P280926	0.00532341	Detected	-0.00532389	Detected	-2.385e-07	-0.0440035	Detected	-0.414782	Detected	-0.229393	0.341673	13800	13500	11500	8150.01	A_24_P280926	Unknown
A_24_P32766	0.0183268	Detected	-0.0183272	Detected	-2.38e-07	0.0987663	Detected	-0.0382843	Detected	0.030241	0.711369	20400	19600	18600	15500	A_24_P32766	Unknown
A_24_P504621	-0.0487061	Compromised	0.0487061	Compromised	0	0.341878	Compromised	0.528973	Compromised	0.435426	0.0539639	1.84	1.94	2.08	2.17	A_24_P504621	Unknown
A_24_P613108	-0.0473213	Compromised	0.0473208	Compromised	-2.385e-07	0.347451	Compromised	0.600814	Compromised	0.474133	0.0726013	1.72	1.81	1.95	2.13	A_24_P613108	Unknown
A_24_P662366	0.0538895	Detected	-0.0538895	Detected	0	0.136544	Detected	-0.206617	Detected	-0.0350361	0.863535	71.4	65.3	65.2	47.1	A_24_P662366	Unknown
A_24_P704878	0.105845	Compromised	-0.105845	Compromised	2.375e-07	-0.644468	Compromised	-0.835093	Compromised	-0.73978	0.0351285	7.92	6.74	4.06	3.26	A_24_P704878	Unknown
A_24_P818268	0.0389271	Detected	-0.0389268	Detected	1.2e-07	-0.315051	Detected	0.241982	Detected	-0.0365341	0.908524	16.6	15.5	11.2	15.1	A_24_P818268	Unknown
A_24_P833256	-0.0479145	Compromised	0.0479145	Compromised	0	0.325449	Compromised	0.492075	Compromised	0.408762	0.0510828	1.88	1.98	2.1	2.16	A_24_P833256	Unknown
A_24_P935506	-0.475336	Compromised	0.475336	Compromised	0	-0.20182	Compromised	0.0569992	Compromised	-0.0724103	0.896623	1.89	3.6	1.97	2.16	A_24_P935506	Unknown
A_32_P10100	0.0616646	Detected	-0.0616651	Detected	-2.39e-07	0.0827265	Detected	0.178963	Detected	0.130845	0.236328	16800	15200	14700	14400	A_32_P10100	Unknown
A_32_P102252	-0.00627446	Detected	0.00627446	Detected	0	-0.319315	Detected	-0.307791	Detected	-0.313553	0.000737324	1700	1690	1180	1090	A_32_P102252	Unknown
A_32_P113154	0.116319	Detected	-0.116318	Detected	2.37e-07	0.0924473	Detected	-0.0087204	Detected	0.0418634	0.772731	9550	8010	8100	6920	A_32_P113154	Unknown
A_32_P125549	0.13385	Detected	-0.13385	Detected	2.4e-07	-0.106015	Detected	-0.208564	Detected	-0.15729	0.386959	21500	17600	15700	13400	A_32_P125549	Unknown
A_32_P152696	0.0377283	Detected	-0.0377278	Detected	2.385e-07	0.000312805	Detected	0.0587673	Detected	0.0295401	0.599048	9890	9250	8310	7929.99	A_32_P152696	Unknown
A_32_P153979	-0.0322814	Compromised	0.0322814	Compromised	0	0.196072	Compromised	0.400058	Compromised	0.298065	0.108293	1.96	2.02	1.98	2.09	A_32_P153979	Unknown
A_32_P185628	0.486122	Detected	-0.486122	Compromised	0	-0.341005	Compromised	0.723278	Compromised	0.191137	0.815695	8.6	4.32	4.18	8.01	A_32_P185628	Unknown
A_32_P230825	0.0270205	Detected	-0.02702	Detected	2.38e-07	0.0245943	Detected	-0.288955	Detected	-0.13218	0.49344	6900	6550	5940	4380	A_32_P230825	Unknown
A_32_P48615	-0.143788	Detected	0.143788	Detected	0	0.100946	Detected	-0.655235	Detected	-0.277144	0.564005	27.6	33.2	28.2	15.3	A_32_P48615	Unknown
A_32_P53558	0.0469773	Detected	-0.0469773	Detected	0	-0.0461218	Detected	0.0169733	Detected	-0.0145743	0.820829	261	241	211	202	A_32_P53558	Unknown
A_32_P79115	-0.053504	Detected	0.053504	Detected	0	-0.133424	Detected	-0.669419	Detected	-0.401422	0.279618	89.6	95.1	73.1	46.2	A_32_P79115	Unknown
A_32_P88905	0.0763419	Detected	-0.0763419	Detected	0	-0.301867	Detected	-0.0027101	Detected	-0.152289	0.460212	520	461	345	389	A_32_P88905	Unknown
A_33_P3209135	-1.09462	Compromised	1.09462	Compromised	2.5e-07	-0.782424	Compromised	-0.578053	Compromised	-0.680239	0.599165	1.84	8.27	1.97	2.08	A_33_P3209135	Unknown
A_33_P3209185	0.202709	Compromised	-0.202709	Compromised	0	-0.434319	Compromised	-0.388624	Compromised	-0.411471	0.181197	6.33	4.71	3.51	3.32	A_33_P3209185	Unknown
A_33_P3209209	-0.0481095	Compromised	0.0481095	Compromised	0	1.1344	Compromised	1.30693	Compromised	1.22067	0.00648378	1.87	1.97	3.66	3.78	A_33_P3209209	Unknown
A_33_P3209566	-0.0578489	Compromised	0.0578489	Compromised	0	0.346464	Compromised	0.548945	Compromised	0.447705	0.061628	1.77	1.89	2.02	2.13	A_33_P3209566	Unknown
A_33_P3209696	-1.16927	Compromised	1.16927	Compromised	2.5e-07	-0.92627	Compromised	-0.708991	Compromised	-0.817631	0.558296	1.95	9.72	1.99	2.12	A_33_P3209696	Unknown
A_33_P3209703	-0.457658	Compromised	0.457659	Compromised	1.15e-07	-1.44619	Compromised	-1.23853	Compromised	-1.34236	0.103577	4.74	8.81	2.06	2.18	A_33_P3209703	Unknown
A_33_P3209756	0.0108588	Detected	-0.0108588	Detected	0	0.224566	Detected	0.247313	Detected	0.23594	0.00441263	75.3	73.1	75.3	70.1	A_33_P3209756	Unknown
A_33_P3209924	-0.0177803	Compromised	0.0177808	Compromised	2.38e-07	0.173901	Compromised	0.399912	Compromised	0.286906	0.128938	1.98	2	1.95	2.09	A_33_P3209924	Unknown
A_33_P3210069	0.0896566	Detected	-0.0896566	Detected	0	0.430693	Detected	0.222758	Detected	0.326725	0.140329	80.2	69.8	87.6	69.5	A_33_P3210069	Unknown
A_33_P3210516	0.196988	Detected	-0.196988	Detected	0	0.361785	Detected	0.311611	Detected	0.336698	0.232061	18	13.5	17.4	15.4	A_33_P3210516	Unknown
A_33_P3210561	0.0958729	Detected	-0.0958734	Detected	-2.38e-07	-0.0863495	Detected	-0.0383692	Detected	-0.0623593	0.592546	17500	15100	13300	12600	A_33_P3210561	Unknown
A_33_P3210605	-0.255323	Compromised	0.255323	Compromised	0	-0.041616	Compromised	0.16237	Compromised	0.0603769	0.846558	1.98	2.78	1.98	2.09	A_33_P3210605	Unknown
A_33_P3210969	-0.107881	Detected	0.107881	Detected	0	-0.236125	Detected	-0.401968	Detected	-0.319047	0.143693	52.6	60.2	41.5	33.9	A_33_P3210969	Unknown
A_33_P3210975	0.570733	Compromised	-0.570733	Compromised	0	-0.160014	Compromised	-0.473491	Compromised	-0.316752	0.646068	5.35	2.39	2.78	2.05	A_33_P3210975	Unknown
A_33_P3211018	-0.0732966	Compromised	0.0732961	Compromised	-2.4e-07	0.350258	Compromised	0.411824	Compromised	0.381041	0.0408777	1.98	2.16	2.29	2.19	A_33_P3211018	Unknown
A_33_P3211098	0.0670547	Compromised	-0.0670543	Compromised	2.4e-07	-0.294741	Compromised	1.13036	Compromised	0.41781	0.618437	3.04	2.73	2.04	5.02	A_33_P3211098	Unknown
A_33_P3211223	-0.493893	Detected	0.493893	Detected	0	-1.98259	Compromised	-2.22647	Compromised	-2.10453	0.0537636	9.21	18	2.83	2.19	A_33_P3211223	Unknown
A_33_P3211478	-0.14775	Compromised	0.14775	Compromised	0	0.045198	Compromised	1.56516	Compromised	0.805177	0.407559	2.1	2.54	2.07	5.44	A_33_P3211478	Unknown
A_33_P3211854	-0.0907626	Compromised	0.0907631	Compromised	2.375e-07	0.335605	Compromised	0.587729	Compromised	0.461667	0.0970166	1.7	1.9	1.97	2.15	A_33_P3211854	Unknown
A_33_P3211862	-0.0540223	Compromised	0.0540223	Compromised	0	0.364504	Compromised	0.586247	Compromised	0.475375	0.0611962	1.77	1.88	2.04	2.18	A_33_P3211862	Unknown
A_33_P3212052	-0.725683	Compromised	0.725683	Detected	1.3e-07	-1.02948	Compromised	-1.46485	Compromised	-1.24716	0.241482	5.64	15.2	3.94	2.67	A_33_P3212052	Unknown
A_33_P3212316	-0.297442	Detected	0.297442	Detected	0	-0.193213	Detected	-0.562267	Detected	-0.37774	0.393365	26	38.7	24.1	17.1	A_33_P3212316	Unknown
A_33_P3212700	-0.000671387	Detected	0.000671387	Detected	0	0.523165	Detected	0.306004	Detected	0.414584	0.0622582	22.1	21.8	27.4	21.6	A_33_P3212700	Unknown
A_33_P3212704	-0.0763104	Detected	0.0763104	Detected	0	-0.960069	Detected	-1.28578	Detected	-1.12293	0.0247048	39.8	43.6	18.6	13.6	A_33_P3212704	Unknown
A_33_P3213134	0.0242999	Detected	-0.0242999	Detected	0	-0.0916336	Detected	-0.558775	Detected	-0.325204	0.300352	891	849	709	470	A_33_P3213134	Unknown
A_33_P3213311	-0.0547495	Compromised	0.0547495	Compromised	0	0.330724	Compromised	0.569917	Compromised	0.45032	0.0757484	1.74	1.85	1.96	2.12	A_33_P3213311	Unknown
A_33_P3213317	0.180636	Detected	-0.180636	Detected	-1.2e-07	0.23298	Detected	-0.209027	Detected	0.0119766	0.970343	18.9	14.5	16.9	11.4	A_33_P3213317	Unknown
A_33_P3213518	-0.24736	Compromised	0.24736	Compromised	0	0.0134325	Compromised	0.229212	Compromised	0.121322	0.697047	2.11	2.93	2.18	2.32	A_33_P3213518	Unknown
A_33_P3213526	0.808042	Compromised	-0.808042	Compromised	0	-0.485886	Compromised	0.595704	Compromised	0.054909	0.9601	5.63	1.81	1.98	3.84	A_33_P3213526	Unknown
A_33_P3213712	-0.0823658	Detected	0.0823658	Detected	0	-0.0885356	Detected	-0.619665	Compromised	-0.3541	0.330819	19.1	21.1	16.4	10.4	A_33_P3213712	Unknown
A_33_P3213992	-0.651316	Compromised	0.651316	Compromised	2.35e-07	-1.43761	Compromised	-0.733788	Compromised	-1.0857	0.280165	4.06	9.87	2.03	3.03	A_33_P3213992	Unknown
A_33_P3214076	0.37971	Compromised	-0.37971	Compromised	0	0.0713611	Compromised	-0.00688887	Compromised	0.0322361	0.940391	3.59	2.09	2.5	2.17	A_33_P3214076	Unknown
A_33_P3214179	0.0323997	Detected	-0.0323997	Detected	0	-0.709693	Detected	-1.82404	Compromised	-1.26687	0.15125	22.5	21.2	11.6	4.91	A_33_P3214179	Unknown
A_33_P3214284	-0.0223885	Compromised	0.0223889	Compromised	2.385e-07	-1.17924	Compromised	-0.538688	Compromised	-0.858966	0.115914	5.43	5.52	2.1	3	A_33_P3214284	Unknown
A_33_P3214750	-0.0555019	Compromised	0.0555015	Compromised	-2.39e-07	0.362404	Compromised	1.33801	Compromised	0.850208	0.225456	1.71	1.82	1.97	3.55	A_33_P3214750	Unknown
A_33_P3214782	-1.5915	Compromised	1.5915	Detected	0	-0.248279	Compromised	-0.983468	Compromised	-0.615874	0.742384	1.81	16.2	3.96	2.18	A_33_P3214782	Unknown
A_33_P3215232	-0.923805	Compromised	0.923805	Compromised	2.4e-07	1.28802	Compromised	0.0740967	Compromised	0.681059	0.600583	1.92	6.81	7.67	3.03	A_33_P3215232	Unknown
A_33_P3215363	0.252934	Detected	-0.252935	Detected	-1.2e-07	-0.505634	Compromised	-0.645646	Compromised	-0.57564	0.159551	13.4	9.3	6.83	5.68	A_33_P3215363	Unknown
A_33_P3215527	-0.35427	Compromised	0.35427	Compromised	0	0.040503	Compromised	0.245656	Compromised	0.14308	0.735459	1.72	2.77	1.95	2.06	A_33_P3215527	Unknown
A_33_P3215565	0.0902863	Compromised	-0.0902863	Compromised	0	1.27549	Compromised	1.29185	Compromised	1.28367	0.00495056	2.3	2	4.51	4.18	A_33_P3215565	Unknown
A_33_P3215611	-0.0663147	Compromised	0.0663152	Compromised	2.37e-07	0.337317	Compromised	1.19899	Compromised	0.768155	0.220097	1.99	2.15	2.27	3.78	A_33_P3215611	Unknown
A_33_P3215729	-0.0294647	Compromised	0.0294647	Compromised	0	0.337012	Compromised	0.483557	Compromised	0.410285	0.0351116	1.88	1.93	2.09	2.12	A_33_P3215729	Unknown
A_33_P3216200	0.0834954	Detected	-0.0834956	Compromised	-1.2e-07	-1.9588	Compromised	-1.56612	Compromised	-1.76246	0.0143398	9.41	8.26	1.97	2.37	A_33_P3216200	Unknown
A_33_P3216487	0.0888591	Detected	-0.0888591	Detected	0	-0.443954	Detected	-0.480128	Detected	-0.462041	0.0364272	101	88	60.2	53.8	A_33_P3216487	Unknown
A_33_P3216621	0.239807	Compromised	-0.239807	Compromised	0	1.18372	Detected	-0.207773	Compromised	0.487975	0.575476	8.56	6.05	14.2	4.96	A_33_P3216621	Unknown
A_33_P3216635	-0.0613737	Compromised	0.0613739	Compromised	1.2e-07	-0.0794363	Compromised	-0.401456	Compromised	-0.240446	0.297638	8.49	9.11	7.23	5.3	A_33_P3216635	Unknown
A_33_P3216640	-0.0499587	Compromised	0.0499582	Compromised	-2.38e-07	0.310067	Compromised	0.555465	Compromised	0.432766	0.0823075	1.78	1.88	1.97	2.14	A_33_P3216640	Unknown
A_33_P3217507	-0.0433245	Compromised	0.0433249	Compromised	2.385e-07	0.34403	Compromised	0.598021	Compromised	0.471026	0.0724442	1.72	1.8	1.94	2.12	A_33_P3217507	Unknown
A_33_P3217629	-0.0444384	Compromised	0.0444388	Compromised	2.39e-07	1.59679	Compromised	0.503245	Compromised	1.05002	0.195715	1.87	1.96	5.03	2.16	A_33_P3217629	Unknown
A_33_P3217867	-0.0552483	Compromised	0.0552483	Compromised	0	0.354246	Compromised	0.613065	Compromised	0.483655	0.0752151	1.72	1.83	1.97	2.16	A_33_P3217867	Unknown
A_33_P3218013	-0.0763836	Detected	0.0763836	Detected	0	-0.796334	Compromised	-0.35655	Compromised	-0.576442	0.131631	13.6	14.9	7.12	8.85	A_33_P3218013	Unknown
A_33_P3218118	0.0197399	Detected	-0.0197399	Detected	0	0.23125	Detected	-0.327894	Detected	-0.0483217	0.878982	65.7	63	65.6	40.8	A_33_P3218118	Unknown
A_33_P3218258	-0.0246749	Compromised	0.0246754	Compromised	2.39e-07	0.685638	Compromised	0.457704	Compromised	0.571671	0.039178	2.02	2.06	2.85	2.23	A_33_P3218258	Unknown
A_33_P3218309	0.62694	Compromised	-0.62694	Compromised	-2.25e-07	-0.297516	Compromised	-0.0399728	Compromised	-0.168744	0.816728	4.38	1.81	1.99	2.18	A_33_P3218309	Unknown
A_33_P3218491	-0.67677	Compromised	0.676769	Compromised	-2.35e-07	-0.594623	Compromised	-0.391018	Compromised	-0.49282	0.546252	2.18	5.49	1.99	2.1	A_33_P3218491	Unknown
A_33_P3218504	-0.171012	Compromised	0.171012	Compromised	-2.4e-07	-1.55195	Compromised	-0.637471	Compromised	-1.09471	0.154157	5.98	7.47	1.98	3.42	A_33_P3218504	Unknown
A_33_P3218564	0.125779	Detected	-0.125779	Detected	2.35e-07	0.0435963	Detected	-0.249372	Detected	-0.102888	0.64739	15100	12500	12300	9200	A_33_P3218564	Unknown
A_33_P3218741	0.0108967	Detected	-0.0108972	Detected	-2.385e-07	0.245563	Detected	0.378466	Detected	0.312015	0.0435571	20500	19900	20800	20900	A_33_P3218741	Unknown
A_33_P3218910	0.227336	Compromised	-0.227336	Compromised	0	0.0242033	Compromised	0.24104	Compromised	0.132622	0.651069	2.67	1.92	2	2.13	A_33_P3218910	Unknown
A_33_P3219138	0.225726	Compromised	-0.225726	Compromised	0	1.19592	Detected	0.884983	Compromised	1.04045	0.0629165	7.34	5.29	12.4	9.16	A_33_P3219138	Unknown
A_33_P3219210	-0.396826	Compromised	0.396825	Compromised	-2.5e-07	-0.460652	Compromised	0.0170655	Compromised	-0.221793	0.679281	3.6	6.15	2.97	3.79	A_33_P3219210	Unknown
A_33_P3219286	0.0574305	Detected	-0.0574305	Detected	0	0.255231	Detected	-0.270862	Detected	-0.0078156	0.979478	45.6	41.5	45.1	28.7	A_33_P3219286	Unknown
A_33_P3219454	0.0299292	Detected	-0.0299296	Detected	-2.385e-07	-0.100318	Detected	0.0476913	Detected	-0.0263133	0.773005	16500	15600	13000	13200	A_33_P3219454	Unknown
A_33_P3219505	-0.0508399	Compromised	0.0508399	Compromised	0	1.14199	Compromised	1.15425	Compromised	1.14812	0.0019834	1.74	1.84	3.43	3.17	A_33_P3219505	Unknown
A_33_P3220213	-0.0105309	Compromised	0.0105305	Compromised	-2.385e-07	0.281564	Compromised	0.514463	Compromised	0.398013	0.076526	1.97	1.97	2.08	2.24	A_33_P3220213	Unknown
A_33_P3220395	-0.0473213	Compromised	0.0473208	Compromised	-2.385e-07	0.340034	Compromised	0.910498	Compromised	0.625266	0.16307	1.72	1.81	1.94	2.64	A_33_P3220395	Unknown
A_33_P3220406	0.618368	Compromised	-0.618368	Compromised	0	-0.341954	Compromised	0.171052	Compromised	-0.0854511	0.910109	4.4	1.84	1.95	2.55	A_33_P3220406	Unknown
A_33_P3220678	0.480304	Compromised	-0.480303	Compromised	2.3e-07	-0.216575	Compromised	-0.0631108	Compromised	-0.139843	0.800775	3.91	1.98	2.08	2.12	A_33_P3220678	Unknown
A_33_P3220748	0.846961	Compromised	-0.846961	Compromised	0	-0.719085	Compromised	-0.507372	Compromised	-0.613229	0.547077	6.73	2.05	1.96	2.08	A_33_P3220748	Unknown
A_33_P3220780	0.736093	Compromised	-0.736093	Compromised	0	1.25717	Compromised	-0.186138	Compromised	0.535517	0.655187	5.18	1.84	6.41	2.16	A_33_P3220780	Unknown
A_33_P3220847	-0.0405912	Compromised	0.0405912	Compromised	0	0.247883	Compromised	0.451869	Compromised	0.349876	0.0859389	1.88	1.96	1.98	2.09	A_33_P3220847	Unknown
A_33_P3220979	-0.0469089	Compromised	0.0469089	Compromised	0	0.360479	Compromised	0.564083	Compromised	0.462281	0.0540682	1.74	1.83	1.99	2.1	A_33_P3220979	Unknown
A_33_P3220994	0.167865	Detected	-0.167866	Detected	-1.15e-07	-1.24616	Compromised	-0.455635	Compromised	-0.8509	0.186052	17.8	13.9	5.76	9.13	A_33_P3220994	Unknown
A_33_P3221040	0.890252	Compromised	-0.890252	Compromised	0	-0.618894	Compromised	-0.564897	Compromised	-0.591896	0.574703	7.46	2.14	2.26	2.15	A_33_P3221040	Unknown
A_33_P3221059	-0.661812	Compromised	0.661812	Compromised	0	0.194468	Compromised	-0.0657821	Compromised	0.064343	0.932698	1.8	4.44	2.81	2.15	A_33_P3221059	Unknown
A_33_P3221134	-0.0249581	Compromised	0.0249581	Compromised	0	0.166723	Compromised	0.385815	Compromised	0.276269	0.133144	1.98	2.02	1.95	2.08	A_33_P3221134	Unknown
A_33_P3221318	-0.279328	Compromised	0.279328	Compromised	0	-1.4548	Compromised	-1.20267	Compromised	-1.32873	0.049294	5.16	7.49	1.97	2.15	A_33_P3221318	Unknown
A_33_P3221384	-0.239676	Detected	0.239676	Detected	0	-0.157213	Detected	-0.575551	Detected	-0.366382	0.368521	23	31.6	21	14.4	A_33_P3221384	Unknown
A_33_P3221793	-0.20796	Detected	0.20796	Detected	0	0.289778	Detected	-0.356371	Detected	-0.0332967	0.938836	21.6	28.4	26.3	15.4	A_33_P3221793	Unknown
A_33_P3221888	-0.0992723	Compromised	0.099272	Compromised	-1.2e-07	-1.40891	Compromised	0.148357	Compromised	-0.630276	0.506254	8.25	9.33	2.87	7.74	A_33_P3221888	Unknown
A_33_P3221925	-0.0105305	Compromised	0.0105309	Compromised	2.385e-07	0.775755	Compromised	0.463296	Compromised	0.619526	0.0583466	1.95	1.95	2.9	2.14	A_33_P3221925	Unknown
A_33_P3221978	0.00145864	Detected	-0.00145864	Detected	0	-1.83977	Compromised	-1.21478	Compromised	-1.52727	0.039408	18.2	17.9	4.38	6.19	A_33_P3221978	Unknown
A_33_P3221980	-0.0218115	Detected	0.021812	Detected	2.385e-07	0.111364	Detected	-0.82824	Detected	-0.358438	0.525594	5710	5800	5400	2580	A_33_P3221980	Unknown
A_33_P3222196	-0.0512953	Compromised	0.0512958	Compromised	2.385e-07	0.372771	Compromised	0.603597	Compromised	0.488184	0.0608831	1.72	1.82	1.99	2.14	A_33_P3222196	Unknown
A_33_P3222354	0.242087	Compromised	-0.242087	Compromised	0	0.0696111	Compromised	0.244742	Compromised	0.157176	0.60364	2.64	1.86	2.02	2.09	A_33_P3222354	Unknown
A_33_P3222524	-0.154204	Compromised	0.154204	Compromised	0	-1.57372	Compromised	-1.26803	Compromised	-1.42087	0.0225626	6.08	7.42	1.96	2.22	A_33_P3222524	Unknown
A_33_P3222529	0.276175	Compromised	-0.276175	Compromised	0	-0.0161014	Compromised	0.063015	Compromised	0.0234568	0.940654	3.11	2.09	2.19	2.12	A_33_P3222529	Unknown
A_33_P3222600	0.0418181	Detected	-0.0418181	Detected	0	0.316725	Detected	0.292241	Detected	0.304483	0.0198708	30	27.9	31.3	28.2	A_33_P3222600	Unknown
A_33_P3222664	-0.116113	Detected	0.116113	Detected	0	0.180884	Detected	0.127233	Detected	0.154058	0.325303	774	896	820	724	A_33_P3222664	Unknown
A_33_P3223111	-0.188369	Compromised	0.188369	Compromised	-1.15e-07	0.565506	Compromised	-0.0548019	Compromised	0.255352	0.554517	6.76	8.65	9.83	5.86	A_33_P3223111	Unknown
A_33_P3223142	-0.185295	Compromised	0.185295	Compromised	0	-0.471468	Compromised	-0.430567	Compromised	-0.451018	0.136674	3.21	4.09	2.27	2.14	A_33_P3223142	Unknown
A_33_P3223663	-0.0449619	Compromised	0.0449615	Compromised	-2.39e-07	-0.0011797	Compromised	0.242498	Compromised	0.120659	0.450931	2.25	2.36	2	2.17	A_33_P3223663	Unknown
A_33_P3223712	-0.0461116	Compromised	0.0461111	Compromised	-2.385e-07	0.371342	Compromised	0.586029	Compromised	0.478686	0.0547222	1.78	1.87	2.05	2.18	A_33_P3223712	Unknown
A_33_P3223860	0.412591	Compromised	-0.412591	Compromised	2.4e-07	0.383296	Compromised	0.594909	Compromised	0.489102	0.36966	3.29	1.83	2.78	2.95	A_33_P3223860	Unknown
A_33_P3224050	-0.798545	Compromised	0.798545	Compromised	0	-0.265049	Compromised	-0.747768	Compromised	-0.506409	0.605559	2.7	8.05	3.37	2.21	A_33_P3224050	Unknown
A_33_P3224285	-0.0560231	Compromised	0.0560231	Compromised	0	-0.0597219	Compromised	-0.0174313	Compromised	-0.0385766	0.585451	7.22	7.69	6.21	5.86	A_33_P3224285	Unknown
A_33_P3224715	0.105265	Compromised	-0.105265	Compromised	-2.4e-07	0.0362415	Compromised	0.262752	Compromised	0.149497	0.435616	2.36	2.01	1.94	2.08	A_33_P3224715	Unknown
A_33_P3224780	-0.0399146	Compromised	0.0399146	Compromised	0	-0.842079	Compromised	0.682894	Compromised	-0.0795922	0.926489	4.57	4.76	2.26	5.96	A_33_P3224780	Unknown
A_33_P3224971	0.0931394	Detected	-0.0931394	Detected	0	-0.00726151	Detected	-0.570475	Detected	-0.288868	0.432827	874	757	703	436	A_33_P3224971	Unknown
A_33_P3225128	-0.045917	Compromised	0.0459175	Compromised	2.38e-07	0.3564	Compromised	0.551424	Compromised	0.453912	0.0520231	1.79	1.88	2.04	2.14	A_33_P3225128	Unknown
A_33_P3225572	-0.0965073	Detected	0.0965073	Detected	0	0.352578	Detected	0.224805	Detected	0.288691	0.130089	1580	1780	1860	1560	A_33_P3225572	Unknown
A_33_P3225983	0.140993	Detected	-0.140993	Detected	0	-0.00533009	Detected	0.149425	Detected	0.0720477	0.698023	89.2	72.3	69.5	70.9	A_33_P3225983	Unknown
A_33_P3226105	-0.114752	Detected	0.114752	Detected	0	-0.952793	Compromised	-1.35629	Compromised	-1.15454	0.0381184	19.3	22.3	9.31	6.45	A_33_P3226105	Unknown
A_33_P3226228	-0.115795	Detected	0.115795	Detected	0	-0.189215	Detected	-0.0557759	Detected	-0.122495	0.456114	94.2	109	77.2	77.6	A_33_P3226228	Unknown
A_33_P3226460	-0.26914	Compromised	0.26914	Compromised	0	-0.779223	Compromised	-0.507809	Compromised	-0.643516	0.166314	3.27	4.68	1.98	2.19	A_33_P3226460	Unknown
A_33_P3226565	-0.00580072	Detected	0.00580072	Detected	0	-0.154664	Detected	-0.279642	Detected	-0.217153	0.0743297	153	152	119	100	A_33_P3226565	Unknown
A_33_P3226675	0.0669565	Compromised	-0.066957	Compromised	-2.4e-07	0.618533	Compromised	2.49096	Compromised	1.55475	0.239475	2.16	1.94	2.73	9.16	A_33_P3226675	Unknown
A_33_P3226680	-0.122938	Compromised	0.122938	Compromised	1.195e-07	-1.87384	Compromised	-0.301868	Compromised	-1.08785	0.304882	7.65	8.94	1.96	5.34	A_33_P3226680	Unknown
A_33_P3226788	-0.0412312	Detected	0.0412312	Detected	0	-0.0499163	Detected	-0.264273	Detected	-0.157094	0.304735	161	168	138	109	A_33_P3226788	Unknown
A_33_P3226800	-0.577816	Compromised	0.577816	Compromised	0	-0.168444	Compromised	1.721	Compromised	0.776279	0.555894	1.79	3.93	2.05	6.96	A_33_P3226800	Unknown
A_33_P3227010	-0.0776813	Detected	0.0776815	Detected	1.2e-07	-0.0104492	Compromised	-0.314183	Compromised	-0.162316	0.441756	9.84	10.8	8.89	6.6	A_33_P3227010	Unknown
A_33_P3227212	-0.2176	Compromised	0.2176	Detected	0	-2.04582	Compromised	-1.84769	Compromised	-1.94675	0.0147506	8.03	10.7	1.95	2.05	A_33_P3227212	Unknown
A_33_P3227225	-0.0440879	Detected	0.0440879	Detected	0	0.0467627	Detected	-0.522094	Compromised	-0.237666	0.495777	14.7	15.4	13.5	8.34	A_33_P3227225	Unknown
A_33_P3227260	0.560057	Compromised	-0.560057	Compromised	0	-0.295098	Compromised	-0.221344	Compromised	-0.258221	0.690642	4.72	2.14	2.25	2.17	A_33_P3227260	Unknown
A_33_P3227300	-0.0467873	Compromised	0.0467868	Compromised	-2.385e-07	0.308474	Compromised	0.4277	Compromised	0.368087	0.0398679	1.94	2.04	2.14	2.13	A_33_P3227300	Unknown
A_33_P3227457	0.160041	Detected	-0.160041	Detected	0	-0.224798	Detected	-0.0940068	Detected	-0.159403	0.453859	907	716	599	601	A_33_P3227457	Unknown
A_33_P3227556	-0.0784891	Detected	0.0784891	Detected	0	-0.317141	Detected	-0.113679	Detected	-0.21541	0.235639	99.2	109	72.5	76.5	A_33_P3227556	Unknown
A_33_P3227703	0.0703905	Detected	-0.0703905	Detected	0	0.285897	Detected	-0.0960262	Detected	0.0949354	0.68676	80.1	71.6	80.2	56.4	A_33_P3227703	Unknown
A_33_P3228212	0.0353656	Compromised	-0.0353656	Compromised	0	-0.839214	Compromised	-0.631547	Compromised	-0.73538	0.0215333	4.38	4.11	2.06	2.18	A_33_P3228212	Unknown
A_33_P3228402	0.581855	Compromised	-0.581855	Compromised	0	0.176856	Compromised	-0.949118	Compromised	-0.386131	0.680449	7.57	3.33	4.93	2.07	A_33_P3228402	Unknown
A_33_P3228499	0.113819	Compromised	-0.113819	Compromised	-2.375e-07	0.354035	Compromised	-1.23821	Compromised	-0.442088	0.637703	7.01	5.9	7.14	2.17	A_33_P3228499	Unknown
A_33_P3228533	-0.017817	Compromised	0.017817	Compromised	0	1.32203	Compromised	0.414067	Compromised	0.868049	0.196231	1.97	1.99	4.3	2.1	A_33_P3228533	Unknown
A_33_P3228543	0.192184	Compromised	-0.192184	Compromised	0	-0.775324	Compromised	0.155931	Compromised	-0.309696	0.601311	4.49	3.39	1.98	3.46	A_33_P3228543	Unknown
A_33_P3228603	-0.0457253	Compromised	0.0457253	Compromised	0	0.362629	Compromised	0.550305	Compromised	0.456467	0.0485206	1.8	1.89	2.06	2.15	A_33_P3228603	Unknown
A_33_P3228828	-0.0515485	Compromised	0.0515485	Compromised	0	0.314929	Compromised	2.14082	Compromised	1.22787	0.311435	1.88	1.99	2.09	6.79	A_33_P3228828	Unknown
A_33_P3228868	0.463604	Detected	-0.463604	Compromised	1.15e-07	0.0434384	Compromised	-1.74772	Compromised	-0.852141	0.487083	12.6	6.53	8.12	2.15	A_33_P3228868	Unknown
A_33_P3229012	0.0963485	Detected	-0.0963485	Detected	0	-0.129645	Detected	-1.34857	Detected	-0.739109	0.35368	47.2	40.7	34.8	13.7	A_33_P3229012	Unknown
A_33_P3229022	-0.000274658	Detected	0.000274181	Detected	-2.38415e-07	-0.0502825	Detected	-0.221979	Detected	-0.136131	0.25369	4250	4190	3540	2880	A_33_P3229022	Unknown
A_33_P3229037	-0.0422821	Compromised	0.0422821	Compromised	0	0.328468	Compromised	0.421736	Compromised	0.375102	0.027026	2	2.09	2.23	2.18	A_33_P3229037	Unknown
A_33_P3229390	-0.0385478	Detected	0.0385478	Detected	0	-0.227552	Detected	-0.280254	Detected	-0.253903	0.0321962	1010	1050	764	675	A_33_P3229390	Unknown
A_33_P3229527	-0.062077	Detected	0.062077	Detected	0	-0.85432	Detected	-0.932954	Detected	-0.893637	0.0066934	243	261	121	105	A_33_P3229527	Unknown
A_33_P3229577	0.268467	Detected	-0.268467	Detected	-1.25e-07	-0.516012	Compromised	0.102629	Detected	-0.206692	0.663918	15.9	10.8	7.96	11.2	A_33_P3229577	Unknown
A_33_P3229587	0.0886335	Detected	-0.0886335	Detected	0	-0.243451	Detected	-0.816299	Detected	-0.529875	0.219214	32.7	28.5	22.4	13.8	A_33_P3229587	Unknown
A_33_P3229678	-0.0173681	Detected	0.0173683	Detected	1.195e-07	-0.296803	Compromised	0.0983257	Compromised	-0.0992388	0.666441	10.5	10.6	7.46	8.99	A_33_P3229678	Unknown
A_33_P3229754	-0.0469089	Compromised	0.0469089	Compromised	0	0.338564	Compromised	0.598031	Compromised	0.468297	0.0769031	1.74	1.83	1.96	2.15	A_33_P3229754	Unknown
A_33_P3229760	-0.556697	Compromised	0.556696	Compromised	-2.5e-07	-0.186021	Compromised	0.0265503	Compromised	-0.0797353	0.901007	1.74	3.71	1.94	2.06	A_33_P3229760	Unknown
A_33_P3229789	-0.0308516	Detected	0.0308516	Detected	0	-0.351481	Detected	-1.0269	Compromised	-0.689189	0.179175	21	21.6	14.5	8.32	A_33_P3229789	Unknown
A_33_P3229958	-0.0594544	Compromised	0.0594544	Compromised	0	0.365756	Compromised	0.623934	Compromised	0.494845	0.0735076	1.71	1.83	1.98	2.17	A_33_P3229958	Unknown
A_33_P3230048	-0.37142	Compromised	0.37142	Compromised	0	-0.15018	Compromised	1.28262	Compromised	0.566222	0.555542	1.91	3.15	1.92	4.75	A_33_P3230048	Unknown
A_33_P3230578	0.388563	Compromised	-0.388564	Compromised	-2.35e-07	0.11029	Compromised	-0.0210252	Compromised	0.0446322	0.920169	3.53	2.03	2.51	2.1	A_33_P3230578	Unknown
A_33_P3230676	0.0954246	Detected	-0.0954249	Detected	-1.2e-07	-0.901288	Compromised	-1.91938	Compromised	-1.41033	0.112543	11.2	9.67	4.84	2.19	A_33_P3230676	Unknown
A_33_P3231005	0.0332003	Detected	-0.0332007	Detected	-2.38e-07	0.21545	Detected	-0.414448	Detected	-0.0994987	0.783129	10200	9600	9980	5910	A_33_P3231005	Unknown
A_33_P3231342	0.469812	Compromised	-0.469813	Compromised	-2.35e-07	-0.17247	Compromised	0.084444	Compromised	-0.044013	0.936233	3.62	1.86	2	2.19	A_33_P3231342	Unknown
A_33_P3231437	0.647256	Compromised	-0.647255	Compromised	2.5e-07	-0.340353	Compromised	-0.094954	Compromised	-0.217653	0.772507	4.53	1.82	1.97	2.14	A_33_P3231437	Unknown
A_33_P3231562	0.373861	Compromised	-0.373861	Compromised	0	-0.702267	Compromised	0.1549	Compromised	-0.273684	0.677866	4.89	2.87	2	3.32	A_33_P3231562	Unknown
A_33_P3231677	-0.0986922	Detected	0.0986922	Detected	0	0.332246	Detected	0.104936	Detected	0.218591	0.283586	40	45.2	46.5	36.4	A_33_P3231677	Unknown
A_33_P3231761	-0.146983	Compromised	0.146983	Compromised	0	-1.06091	Compromised	1.40136	Compromised	0.170224	0.903375	4.37	5.28	2	10.1	A_33_P3231761	Unknown
A_33_P3231833	-0.00895047	Detected	0.00895047	Detected	0	-0.397674	Detected	-0.187898	Detected	-0.292786	0.108614	457	456	301	319	A_33_P3231833	Unknown
A_33_P3232544	0.0134437	Detected	-0.0134437	Detected	0	0.0470073	Detected	-0.471473	Detected	-0.212233	0.499505	673	651	594	380	A_33_P3232544	Unknown
A_33_P3232643	-0.0591011	Compromised	0.0591016	Compromised	2.375e-07	0.336444	Compromised	0.404325	Compromised	0.370384	0.0322309	2.01	2.15	2.28	2.19	A_33_P3232643	Unknown
A_33_P3232742	0.766922	Compromised	-0.766922	Compromised	2.5e-07	-0.494709	Compromised	-0.313496	Compromised	-0.404102	0.652981	5.7	1.94	2.05	2.13	A_33_P3232742	Unknown
A_33_P3233000	0.0973337	Detected	-0.0973337	Detected	0	-0.193548	Detected	-0.624377	Detected	-0.408962	0.225756	28.8	24.8	20.3	13.8	A_33_P3233000	Unknown
A_33_P3233085	-0.193732	Compromised	0.193732	Compromised	-2.4e-07	-0.0818405	Compromised	-1.1123	Compromised	-0.597071	0.391404	5.43	7	5.06	2.27	A_33_P3233085	Unknown
A_33_P3233100	0.330498	Detected	-0.330498	Compromised	0	-2.03579	Compromised	-1.80928	Compromised	-1.92254	0.0314718	11.6	7.23	1.94	2.08	A_33_P3233100	Unknown
A_33_P3233229	-0.0435753	Compromised	0.0435753	Compromised	0	0.257595	Compromised	0.569133	Compromised	0.413364	0.125037	1.92	2.01	2.04	2.32	A_33_P3233229	Unknown
A_33_P3233318	-0.127764	Compromised	0.127763	Detected	-1.2e-07	0.658577	Detected	-0.164665	Compromised	0.246956	0.624484	9.01	10.6	13.4	6.94	A_33_P3233318	Unknown
A_33_P3233546	-0.0363617	Compromised	0.0363617	Compromised	0	0.221739	Compromised	0.425725	Compromised	0.323732	0.0960303	1.92	1.99	1.98	2.09	A_33_P3233546	Unknown
A_33_P3233731	0.0891943	Compromised	-0.0891938	Compromised	2.4e-07	-0.00296021	Compromised	-0.70028	Compromised	-0.35162	0.431594	7.59	6.61	6.14	3.47	A_33_P3233731	Unknown
A_33_P3233953	0.0953026	Detected	-0.0953031	Detected	-2.4e-07	-0.0765953	Detected	0.127602	Detected	0.0255032	0.871944	4690	4050	3590	3790	A_33_P3233953	Unknown
A_33_P3234108	-0.051527	Compromised	0.0515275	Compromised	2.385e-07	0.351658	Compromised	0.59141	Compromised	0.471534	0.0687672	1.71	1.81	1.95	2.11	A_33_P3234108	Unknown
A_33_P3234377	0.0522347	Detected	-0.0522351	Detected	-2.38e-07	-0.383911	Detected	-0.555608	Detected	-0.469759	0.0428424	6480	5940	4130	3360	A_33_P3234377	Unknown
A_33_P3234402	-0.0600138	Compromised	0.0600138	Compromised	0	0.38217	Compromised	0.640348	Compromised	0.511259	0.069541	1.69	1.81	1.98	2.17	A_33_P3234402	Unknown
A_33_P3234442	-0.0570855	Compromised	0.0570855	Compromised	0	0.330104	Compromised	0.518672	Compromised	0.424388	0.0613126	1.8	1.92	2.03	2.12	A_33_P3234442	Unknown
A_33_P3234447	-0.0366287	Compromised	0.0366287	Compromised	0	0.293723	Compromised	0.521108	Compromised	0.407416	0.0762543	1.9	1.97	2.06	2.21	A_33_P3234447	Unknown
A_33_P3234540	-0.0105307	Detected	0.0105307	Detected	0	0.510065	Detected	-0.420328	Detected	0.0448685	0.931975	135	135	167	80.3	A_33_P3234540	Unknown
A_33_P3234814	-0.0491147	Compromised	0.0491147	Compromised	0	0.343298	Compromised	0.544332	Compromised	0.443815	0.0580625	1.82	1.92	2.06	2.17	A_33_P3234814	Unknown
A_33_P3235142	-0.0555019	Compromised	0.0555015	Compromised	-2.39e-07	0.355062	Compromised	0.587435	Compromised	0.471249	0.0672176	1.71	1.82	1.96	2.11	A_33_P3235142	Unknown
A_33_P3235162	-0.0354686	Compromised	0.0354686	Compromised	0	0.262713	Compromised	0.4555	Compromised	0.359106	0.0729668	1.99	2.06	2.11	2.21	A_33_P3235162	Unknown
A_33_P3235360	-0.168959	Detected	0.168959	Detected	0	-0.197181	Detected	-0.170306	Detected	-0.183743	0.391622	28.5	35.5	24.1	22.5	A_33_P3235360	Unknown
A_33_P3235491	-0.0830889	Detected	0.0830889	Detected	0	0.0562158	Detected	-0.339857	Detected	-0.141821	0.576904	37.8	41.8	35.9	25	A_33_P3235491	Unknown
A_33_P3235521	-0.0512953	Compromised	0.0512958	Compromised	2.385e-07	1.11553	Compromised	0.569489	Compromised	0.842507	0.0936898	1.72	1.82	3.33	2.09	A_33_P3235521	Unknown
A_33_P3235831	0.126793	Detected	-0.126793	Detected	0	-0.226598	Detected	-0.531954	Detected	-0.379276	0.196161	92.3	76.3	62.3	46.2	A_33_P3235831	Unknown
A_33_P3236152	-0.0495319	Compromised	0.0495319	Compromised	0	0.322721	Compromised	0.428986	Compromised	0.375854	0.035381	1.98	2.09	2.21	2.18	A_33_P3236152	Unknown
A_33_P3236213	0.236765	Compromised	-0.236765	Compromised	2.35e-07	0.52647	Compromised	0.197754	Compromised	0.362112	0.335846	7.58	5.38	7.99	5.83	A_33_P3236213	Unknown
A_33_P3236778	0.123411	Compromised	-0.123412	Compromised	-2.375e-07	0.672538	Compromised	0.180571	Compromised	0.426554	0.261288	5.96	4.95	7.52	4.9	A_33_P3236778	Unknown
A_33_P3237344	-0.080168	Detected	0.0801682	Detected	1.2e-07	-0.50151	Compromised	-1.43266	Compromised	-0.967083	0.177247	14.8	16.3	9.53	4.58	A_33_P3237344	Unknown
A_33_P3237605	-0.0968502	Detected	0.0968502	Detected	0	-0.13643	Detected	-1.54177	Compromised	-0.8391	0.358388	23.6	26.6	19.8	6.85	A_33_P3237605	Unknown
A_33_P3237704	0.00270534	Detected	-0.00270534	Detected	0	0.377567	Detected	-0.262376	Detected	0.0575955	0.873742	330	324	369	217	A_33_P3237704	Unknown
A_33_P3237719	-0.259701	Detected	0.259701	Detected	0	0.269868	Detected	0.320997	Detected	0.295433	0.375054	14.3	20.2	17.8	16.9	A_33_P3237719	Unknown
A_33_P3237819	-0.444344	Compromised	0.444344	Compromised	0	-1.02814	Compromised	-0.881696	Compromised	-0.95492	0.168054	3.65	6.66	2.1	2.13	A_33_P3237819	Unknown
A_33_P3237835	-0.212414	Compromised	0.212414	Detected	0	0.248334	Compromised	0.14402	Compromised	0.196177	0.464416	7.71	10.2	9.15	7.8	A_33_P3237835	Unknown
A_33_P3237905	-0.582991	Compromised	0.582991	Compromised	0	0.976247	Compromised	-0.128968	Compromised	0.423639	0.650586	1.94	4.29	4.93	2.1	A_33_P3237905	Unknown
A_33_P3238325	0.221278	Detected	-0.221278	Detected	0	-0.0286326	Detected	-0.644013	Detected	-0.336323	0.468484	30.2	21.9	21.9	13.1	A_33_P3238325	Unknown
A_33_P3238402	0.0155449	Detected	-0.0155449	Detected	0	-0.0894785	Detected	-0.317724	Detected	-0.203601	0.219137	33.8	32.6	27.1	21.2	A_33_P3238402	Unknown
A_33_P3238611	0.0567937	Compromised	-0.0567942	Compromised	-2.385e-07	0.256145	Compromised	0.971892	Compromised	0.614019	0.232247	2.02	1.84	2	3.01	A_33_P3238611	Unknown
A_33_P3238773	-0.53879	Compromised	0.53879	Detected	0	0.0320141	Detected	-0.116732	Compromised	-0.0423588	0.945014	8.51	17.7	10.9	9.01	A_33_P3238773	Unknown
A_33_P3238802	-0.0481095	Compromised	0.0481095	Compromised	0	0.291129	Compromised	0.519474	Compromised	0.405301	0.0821002	1.87	1.97	2.04	2.19	A_33_P3238802	Unknown
A_33_P3238944	-0.047199	Detected	0.047199	Detected	0	-0.474861	Detected	-1.31477	Compromised	-0.894816	0.168422	32.6	34.3	20.9	10.7	A_33_P3238944	Unknown
A_33_P3239102	0.0449858	Detected	-0.0449853	Detected	2.38e-07	-0.193376	Detected	0.173023	Detected	-0.0101762	0.961882	5130	4750	3750	4430	A_33_P3239102	Unknown
A_33_P3239659	0.326031	Compromised	-0.326031	Compromised	0	-0.930892	Compromised	-0.737795	Compromised	-0.834344	0.133598	5.82	3.65	2.1	2.2	A_33_P3239659	Unknown
A_33_P3239714	-0.0506158	Compromised	0.0506158	Compromised	0	0.362932	Compromised	0.941151	Compromised	0.652041	0.156424	1.75	1.85	2.01	2.75	A_33_P3239714	Unknown
A_33_P3239724	0.0867929	Compromised	-0.0867934	Compromised	-2.37e-07	0.213912	Compromised	0.419463	Compromised	0.316687	0.14278	2.06	1.8	1.94	2.05	A_33_P3239724	Unknown
A_33_P3239936	-0.196	Compromised	0.196	Compromised	-2.4e-07	0.154523	Compromised	0.27362	Compromised	0.214072	0.405701	1.91	2.47	2.1	2.09	A_33_P3239936	Unknown
A_33_P3239989	0.0429268	Compromised	-0.0429268	Compromised	0	-0.104206	Compromised	-0.0203476	Compromised	-0.0622766	0.40836	7.14	6.63	5.56	5.4	A_33_P3239989	Unknown
A_33_P3240078	-0.438624	Compromised	0.438624	Detected	0	0.125741	Compromised	0.639127	Compromised	0.382434	0.530259	5.27	9.54	6.72	8.79	A_33_P3240078	Unknown
A_33_P3240144	-0.0362301	Compromised	0.0362306	Compromised	2.385e-07	0.214376	Compromised	0.425249	Compromised	0.319813	0.103075	1.93	2	1.98	2.1	A_33_P3240144	Unknown
A_33_P3240158	-0.219887	Compromised	0.219887	Compromised	0	0.133997	Compromised	0.266644	Compromised	0.200321	0.475065	1.96	2.62	2.16	2.17	A_33_P3240158	Unknown
A_33_P3240234	0.2152	Detected	-0.2152	Detected	0	-0.800162	Detected	-1.0706	Detected	-0.935381	0.0665436	36.1	26.4	15.4	11.7	A_33_P3240234	Unknown
A_33_P3240652	-0.196255	Detected	0.196255	Detected	-1.2e-07	0.073595	Detected	0.199578	Detected	0.136587	0.575694	12.6	16.3	13.1	13.1	A_33_P3240652	Unknown
A_33_P3241043	0.0913105	Detected	-0.0913105	Detected	0	-0.0835171	Detected	-0.164644	Detected	-0.124081	0.340165	88099.9	76499.9	67300	58300	A_33_P3241043	Unknown
A_33_P3241046	0.704045	Compromised	-0.704046	Compromised	-2.5e-07	-0.950044	Compromised	0.646645	Compromised	-0.1517	0.899734	7.19	2.67	1.97	5.46	A_33_P3241046	Unknown
A_33_P3241150	-0.322818	Compromised	0.322818	Compromised	-2.4e-07	0.331949	Compromised	-0.736665	Compromised	-0.202358	0.77658	4.67	7.2	6.34	2.77	A_33_P3241150	Unknown
A_33_P3241184	0.191002	Detected	-0.191002	Detected	0	1.3589	Detected	0.139501	Detected	0.749203	0.361714	160	121	310	122	A_33_P3241184	Unknown
A_33_P3241596	0.0354583	Detected	-0.0354583	Detected	0	0.290986	Detected	-0.317709	Detected	-0.0133617	0.969179	1020	957	1050	631	A_33_P3241596	Unknown
A_33_P3242039	-0.193705	Detected	0.193705	Detected	0	-0.590723	Detected	-0.12473	Detected	-0.357726	0.359142	33.9	43.7	22.2	28.1	A_33_P3242039	Unknown
A_33_P3242062	-0.154397	Compromised	0.154397	Compromised	0	-0.113054	Compromised	0.159061	Compromised	0.0230036	0.921205	2.22	2.71	1.97	2.18	A_33_P3242062	Unknown
A_33_P3242416	0.0669372	Detected	-0.0669372	Detected	0	-0.16613	Detected	-0.460327	Detected	-0.313229	0.192187	38.3	34.4	28.1	21	A_33_P3242416	Unknown
A_33_P3242753	-0.0391026	Compromised	0.0391026	Compromised	0	0.217673	Compromised	0.419424	Compromised	0.318549	0.0985862	1.98	2.06	2.04	2.15	A_33_P3242753	Unknown
A_33_P3242814	-0.355361	Compromised	0.355361	Compromised	0	0.0126743	Compromised	0.179881	Compromised	0.0962775	0.816676	1.86	3	2.07	2.13	A_33_P3242814	Unknown
A_33_P3243343	-0.0122433	Detected	0.0122437	Detected	2.385e-07	0.140138	Detected	0.0544281	Detected	0.0972829	0.160757	8410	8430	8060	6960	A_33_P3243343	Unknown
A_33_P3243600	0.177544	Compromised	-0.177544	Compromised	0	0.125849	Compromised	0.348047	Compromised	0.236948	0.375314	2.44	1.88	2.03	2.17	A_33_P3243600	Unknown
A_33_P3244157	-0.243619	Compromised	0.243619	Compromised	0	0.0140314	Compromised	0.237626	Compromised	0.125829	0.684966	1.94	2.68	2	2.14	A_33_P3244157	Unknown
A_33_P3244269	0.248834	Detected	-0.248834	Detected	1.2e-07	0.13819	Detected	0.0558562	Compromised	0.0970232	0.737525	14.9	10.4	11.9	10.3	A_33_P3244269	Unknown
A_33_P3244361	-0.032728	Detected	0.032728	Detected	0	-0.258306	Detected	-0.182076	Detected	-0.220191	0.0483142	1280	1320	944	912	A_33_P3244361	Unknown
A_33_P3244651	-0.044796	Compromised	0.0447965	Compromised	2.385e-07	0.288581	Compromised	0.525064	Compromised	0.406822	0.0845316	1.85	1.94	2.01	2.17	A_33_P3244651	Unknown
A_33_P3244834	-0.394557	Compromised	0.394557	Compromised	0	-0.173726	Compromised	0.0216312	Compromised	-0.0760474	0.868848	2.02	3.44	2.03	2.13	A_33_P3244834	Unknown
A_33_P3245021	-0.329535	Compromised	0.329535	Compromised	2.4e-07	0.855522	Compromised	0.295973	Compromised	0.575747	0.314402	1.78	2.77	3.49	2.17	A_33_P3245021	Unknown
A_33_P3245126	0.0415237	Detected	-0.0415237	Detected	0	0.208838	Detected	-0.533689	Compromised	-0.162426	0.706136	15.8	14.7	15.3	8.38	A_33_P3245126	Unknown
A_33_P3245133	0.0240045	Detected	-0.0240045	Detected	0	0.374682	Detected	-0.496671	Detected	-0.0609944	0.901635	49.2	46.9	54.1	27.1	A_33_P3245133	Unknown
A_33_P3245620	0.0533474	Detected	-0.0533474	Detected	0	-0.230158	Detected	-0.128539	Detected	-0.179349	0.135315	1180	1080	836	822	A_33_P3245620	Unknown
A_33_P3245623	-0.279692	Compromised	0.279692	Detected	1.15e-07	-1.36416	Compromised	-1.66307	Compromised	-1.51361	0.0412006	7.23	10.5	2.94	2.19	A_33_P3245623	Unknown
A_33_P3245660	-0.0517616	Compromised	0.0517616	Compromised	0	0.381911	Compromised	0.653325	Compromised	0.517618	0.0705101	1.7	1.8	1.98	2.19	A_33_P3245660	Unknown
A_33_P3245841	0.402919	Compromised	-0.402919	Compromised	-2.4e-07	-0.217542	Compromised	-0.00666952	Compromised	-0.112106	0.813025	3.53	1.99	1.98	2.1	A_33_P3245841	Unknown
A_33_P3245907	0.262815	Compromised	-0.262815	Compromised	0	0.0106125	Compromised	0.311274	Compromised	0.160943	0.64816	2.79	1.91	2.02	2.28	A_33_P3245907	Unknown
A_33_P3246011	0.270409	Compromised	-0.270409	Compromised	0	-0.00410605	Compromised	0.0955257	Compromised	0.0457098	0.883253	3.1	2.1	2.21	2.17	A_33_P3246011	Unknown
A_33_P3246413	0.0922613	Compromised	-0.0922613	Compromised	0	-0.848542	Compromised	-0.786689	Compromised	-0.817615	0.0138701	5.12	4.44	2.3	2.2	A_33_P3246413	Unknown
A_33_P3246780	-0.0354686	Compromised	0.0354686	Compromised	0	0.18547	Compromised	0.388696	Compromised	0.287083	0.116492	1.99	2.06	2	2.11	A_33_P3246780	Unknown
A_33_P3247068	-0.0339279	Compromised	0.0339279	Compromised	0	0.34441	Compromised	0.512213	Compromised	0.428312	0.0418637	1.82	1.88	2.04	2.1	A_33_P3247068	Unknown
A_33_P3247072	0.373883	Compromised	-0.373883	Compromised	0	-0.223881	Compromised	0.0264301	Compromised	-0.0987256	0.825654	3.51	2.06	2	2.18	A_33_P3247072	Unknown
A_33_P3247077	-0.0124512	Detected	0.0124516	Detected	2.385e-07	-0.305097	Detected	-0.310618	Detected	-0.307858	0.00171185	3750	3760	2640	2410	A_33_P3247077	Unknown
A_33_P3247095	-0.147469	Detected	0.147469	Detected	0	-0.403726	Detected	-0.45144	Detected	-0.427583	0.103463	46.4	56.1	33.5	29.7	A_33_P3247095	Unknown
A_33_P3247210	-0.0702901	Detected	0.0702901	Detected	0	-0.219944	Detected	-0.556067	Detected	-0.388006	0.166915	52.1	56.6	40.5	29.4	A_33_P3247210	Unknown
A_33_P3247252	0.464757	Compromised	-0.464757	Compromised	2.35e-07	0.430053	Compromised	-0.0106645	Compromised	0.209694	0.723002	3.73	1.93	3.14	2.12	A_33_P3247252	Unknown
A_33_P3247678	-0.142854	Detected	0.142854	Detected	-1.2e-07	0.0996115	Detected	-0.597746	Compromised	-0.249067	0.576575	14.9	17.9	15.2	8.59	A_33_P3247678	Unknown
A_33_P3247689	-0.0444384	Compromised	0.0444388	Compromised	2.39e-07	0.251731	Compromised	0.448797	Compromised	0.350264	0.0834805	1.87	1.96	1.98	2.08	A_33_P3247689	Unknown
A_33_P3247783	0.269703	Compromised	-0.269703	Compromised	0	-0.00597477	Compromised	0.140668	Compromised	0.0673466	0.832036	2.92	1.98	2.08	2.11	A_33_P3247783	Unknown
A_33_P3247919	-0.159515	Detected	0.159515	Detected	0	0.533545	Detected	0.137107	Detected	0.335326	0.318234	17	20.9	23.7	16.5	A_33_P3247919	Unknown
A_33_P3248028	-0.369887	Compromised	0.369888	Compromised	2.4e-07	0.029233	Compromised	0.822372	Compromised	0.425803	0.514588	1.75	2.88	1.99	3.16	A_33_P3248028	Unknown
A_33_P3248077	-0.062201	Compromised	0.0622005	Compromised	-2.385e-07	0.16572	Compromised	0.353988	Compromised	0.259854	0.147833	2.02	2.17	2.04	2.13	A_33_P3248077	Unknown
A_33_P3248222	0.168245	Compromised	-0.168245	Compromised	0	-0.487313	Compromised	-0.271348	Compromised	-0.379331	0.198204	3.69	2.88	2.02	2.15	A_33_P3248222	Unknown
A_33_P3248774	-0.122967	Detected	0.122967	Detected	0	0.150328	Detected	-0.215802	Detected	-0.032737	0.895606	33.2	38.8	34.6	24.6	A_33_P3248774	Unknown
A_33_P3248939	-0.900748	Compromised	0.900747	Compromised	-2.5e-07	0.450462	Compromised	-0.195662	Compromised	0.1274	0.906274	1.7	5.84	3.74	2.19	A_33_P3248939	Unknown
A_33_P3248948	0.355973	Compromised	-0.355973	Compromised	2.35e-07	1.13603	Compromised	0.699622	Compromised	0.917825	0.159006	3.64	2.19	5.39	3.65	A_33_P3248948	Unknown
A_33_P3248997	-0.0467873	Compromised	0.0467868	Compromised	-2.385e-07	0.328558	Compromised	0.454541	Compromised	0.39155	0.037892	1.94	2.04	2.17	2.17	A_33_P3248997	Unknown
A_33_P3249002	0.104618	Detected	-0.104618	Detected	2.37e-07	-0.156263	Detected	0.0635481	Detected	-0.0463576	0.78884	12200	10400	8780	9370	A_33_P3249002	Unknown
A_33_P3249066	0.00773215	Detected	-0.00773215	Compromised	0	-0.0631065	Compromised	-0.0504055	Compromised	-0.056756	0.0297019	10	9.75	8.21	7.59	A_33_P3249066	Unknown
A_33_P3249897	0.257041	Detected	-0.257041	Compromised	0	-1.93135	Compromised	-1.73825	Compromised	-1.8348	0.0216695	11.1	7.66	2.1	2.2	A_33_P3249897	Unknown
A_33_P3250263	0.0473404	Compromised	-0.0473404	Compromised	0	-0.851256	Compromised	-0.581537	Compromised	-0.716397	0.0375745	4.54	4.19	2.1	2.32	A_33_P3250263	Unknown
A_33_P3250323	-0.0888934	Detected	0.0888934	Detected	0	0.479478	Detected	0.503281	Detected	0.49138	0.0317362	9.15	10.2	11.7	10.9	A_33_P3250323	Unknown
A_33_P3250669	-0.236927	Compromised	0.236927	Compromised	0	0.141839	Compromised	1.99304	Compromised	1.06744	0.380104	1.98	2.71	2.22	7.34	A_33_P3250669	Unknown
A_33_P3250767	-0.180122	Detected	0.180122	Detected	0	0.228574	Detected	-0.165296	Detected	0.0316391	0.916466	61.5	77.8	70.4	49.1	A_33_P3250767	Unknown
A_33_P3251209	0.0976281	Compromised	-0.0976281	Compromised	0	0.102072	Compromised	0.310126	Compromised	0.206099	0.285405	2.37	2.04	2.05	2.17	A_33_P3251209	Unknown
A_33_P3251252	-0.301479	Detected	0.301479	Detected	0	-0.681953	Detected	-0.965469	Compromised	-0.823711	0.131959	15.7	23.5	10.4	7.83	A_33_P3251252	Unknown
A_33_P3251408	-0.876889	Compromised	0.876889	Compromised	0	-0.435948	Compromised	-0.171803	Compromised	-0.303875	0.764508	1.7	5.65	1.99	2.19	A_33_P3251408	Unknown
A_33_P3251412	-0.0348673	Compromised	0.0348678	Compromised	2.385e-07	1.07247	Compromised	0.373865	Compromised	0.723166	0.175567	2.04	2.11	3.79	2.14	A_33_P3251412	Unknown
A_33_P3251557	1.20389	Detected	-1.20389	Compromised	1e-07	0.149609	Compromised	-0.53259	Compromised	-0.191491	0.892415	10.5	1.95	4.36	2.49	A_33_P3251557	Unknown
A_33_P3251598	0.381823	Compromised	-0.381822	Compromised	2.5e-07	-0.376055	Compromised	1.01339	Compromised	0.318667	0.726585	5.53	3.21	2.82	6.77	A_33_P3251598	Unknown
A_33_P3251868	-0.2156	Compromised	0.2156	Compromised	0	-0.485365	Compromised	-0.312297	Compromised	-0.398831	0.228163	2.95	3.92	2.11	2.18	A_33_P3251868	Unknown
A_33_P3251916	-0.265461	Compromised	0.265461	Compromised	-2.35e-07	0.05404	Compromised	0.258026	Compromised	0.156033	0.638295	1.84	2.62	1.98	2.09	A_33_P3251916	Unknown
A_33_P3252134	-0.0338624	Detected	0.0338624	Detected	0	-0.239789	Detected	-0.165895	Detected	-0.202842	0.0559706	943	974	705	680	A_33_P3252134	Unknown
A_33_P3252191	-0.00822496	Detected	0.00822496	Detected	0	-0.219824	Detected	0.314483	Detected	0.0473297	0.875757	94	93.7	70	92.9	A_33_P3252191	Unknown
A_33_P3252279	0.0136895	Compromised	-0.013689	Compromised	2.385e-07	0.267661	Compromised	0.495824	Compromised	0.381742	0.0798888	2.12	2.05	2.18	2.34	A_33_P3252279	Unknown
A_33_P3252441	-0.275264	Detected	0.275264	Detected	0	-1.92158	Compromised	-0.346987	Compromised	-1.13428	0.306843	10.6	15.3	2.92	7.97	A_33_P3252441	Unknown
A_33_P3252444	-0.0552483	Compromised	0.0552483	Compromised	0	0.37605	Compromised	0.626361	Compromised	0.501206	0.067094	1.72	1.83	2	2.18	A_33_P3252444	Unknown
A_33_P3252594	-0.146889	Detected	0.146889	Detected	0	-0.159954	Detected	-0.400932	Detected	-0.280443	0.27791	49.5	59.8	42.3	32.8	A_33_P3252594	Unknown
A_33_P3252685	-0.0246749	Compromised	0.0246754	Compromised	2.39e-07	0.258741	Compromised	0.464159	Compromised	0.36145	0.0758207	2.02	2.06	2.12	2.24	A_33_P3252685	Unknown
A_33_P3253124	0.568652	Compromised	-0.568652	Compromised	2.25e-07	-0.2538	Compromised	0.00501919	Compromised	-0.12439	0.850866	4.04	1.81	1.97	2.16	A_33_P3253124	Unknown
A_33_P3253179	-0.0356579	Compromised	0.0356579	Compromised	0	-1.16694	Compromised	-0.993873	Compromised	-1.08041	0.00742091	5.36	5.55	2.11	2.18	A_33_P3253179	Unknown
A_33_P3253304	-1.50463	Compromised	1.50463	Detected	1e-07	-1.10712	Compromised	-0.270645	Compromised	-0.688884	0.702231	1.84	14.6	2.09	3.42	A_33_P3253304	Unknown
A_33_P3253420	-0.0512953	Compromised	0.0512958	Compromised	2.385e-07	0.350857	Compromised	1.47315	Compromised	0.912006	0.246969	1.72	1.82	1.96	3.91	A_33_P3253420	Unknown
A_33_P3253717	-0.0341835	Compromised	0.034184	Compromised	2.39e-07	0.338722	Compromised	0.521013	Compromised	0.429868	0.0476458	1.8	1.86	2.01	2.09	A_33_P3253717	Unknown
A_33_P3253812	0.218143	Detected	-0.218143	Detected	1.2e-07	0.423487	Detected	-0.305421	Compromised	0.0590332	0.902196	17.3	12.6	17.2	9.51	A_33_P3253812	Unknown
A_33_P3253832	0.0137415	Detected	-0.013741	Detected	2.385e-07	-0.05266	Detected	0.142486	Detected	0.0449128	0.69324	2720	2630	2240	2350	A_33_P3253832	Unknown
A_33_P3253892	-0.0507174	Compromised	0.0507174	Compromised	0	0.305947	Compromised	0.431931	Compromised	0.368939	0.0448415	1.92	2.03	2.12	2.12	A_33_P3253892	Unknown
A_33_P3253902	0.372887	Detected	-0.372888	Compromised	-1.15e-07	-1.94497	Compromised	-0.273301	Compromised	-1.10914	0.349311	12.2	7.17	2.11	6.16	A_33_P3253902	Unknown
A_33_P3254375	-0.354811	Compromised	0.354811	Detected	-1.25e-07	-0.12472	Compromised	-0.015121	Compromised	-0.0699205	0.863575	7.88	12.7	7.97	7.88	A_33_P3254375	Unknown
A_33_P3254580	-0.0434079	Compromised	0.0434079	Compromised	0	0.214467	Compromised	0.418071	Compromised	0.316269	0.103741	1.93	2.02	1.99	2.1	A_33_P3254580	Unknown
A_33_P3254675	-0.396926	Compromised	0.396926	Compromised	0	-0.0419731	Compromised	0.163979	Compromised	0.0610027	0.895386	1.75	2.99	1.93	2.04	A_33_P3254675	Unknown
A_33_P3254831	-0.78956	Compromised	0.78956	Detected	0	0.371556	Detected	-0.0917487	Detected	0.139904	0.880634	8.66	25.5	16.7	11.1	A_33_P3254831	Unknown
A_33_P3255046	0.0328255	Detected	-0.032825	Detected	2.385e-07	-0.0165024	Detected	-0.0586414	Detected	-0.0375719	0.437055	2400	2260	2000	1780	A_33_P3255046	Unknown
A_33_P3255056	0.833703	Detected	-0.833703	Compromised	1.2e-07	-0.488458	Compromised	-0.00139546	Compromised	-0.244927	0.804448	15.6	4.84	5.38	6.91	A_33_P3255056	Unknown
A_33_P3255065	-0.202863	Compromised	0.202863	Compromised	0	0.205492	Compromised	0.406526	Compromised	0.306009	0.30907	1.8	2.35	2.06	2.17	A_33_P3255065	Unknown
A_33_P3255070	-0.0489092	Compromised	0.0489092	Compromised	0	0.27115	Compromised	0.489326	Compromised	0.380238	0.0862559	1.83	1.93	1.97	2.1	A_33_P3255070	Unknown
A_33_P3255359	-0.0473213	Compromised	0.0473208	Compromised	-2.385e-07	0.347451	Compromised	0.552605	Compromised	0.450028	0.0576187	1.72	1.81	1.95	2.06	A_33_P3255359	Unknown
A_33_P3255677	-0.367944	Compromised	0.367944	Compromised	-1.2e-07	0.780856	Detected	-1.46048	Compromised	-0.339813	0.800387	5.91	9.7	11.3	2.19	A_33_P3255677	Unknown
A_33_P3255824	-0.0503941	Compromised	0.0503945	Compromised	2.375e-07	0.311212	Compromised	0.516365	Compromised	0.413788	0.0685355	1.76	1.86	1.95	2.06	A_33_P3255824	Unknown
A_33_P3256355	-0.146227	Detected	0.146227	Detected	0	0.143993	Detected	-0.368116	Detected	-0.112061	0.740478	45.9	55.4	48.4	31.1	A_33_P3256355	Unknown
A_33_P3256480	0.079951	Detected	-0.079951	Detected	0	-0.529915	Detected	-1.1084	Detected	-0.819157	0.112087	246	217	139	85.3	A_33_P3256480	Unknown
A_33_P3256565	-0.0757291	Detected	0.0757289	Detected	-1.2e-07	1.04227	Detected	-0.618164	Compromised	0.212051	0.82298	14.8	16.2	27.7	8.03	A_33_P3256565	Unknown
A_33_P3256655	-0.0374641	Compromised	0.0374641	Compromised	0	0.274733	Compromised	1.68255	Compromised	0.978639	0.299453	1.84	1.91	1.97	4.79	A_33_P3256655	Unknown
A_33_P3256883	0.464931	Compromised	-0.464931	Compromised	0	-0.695388	Compromised	-0.60212	Compromised	-0.648754	0.299434	5.78	2.99	2.23	2.18	A_33_P3256883	Unknown
A_33_P3256888	-0.12309	Detected	0.12309	Detected	0	-0.0709724	Detected	-1.17631	Detected	-0.623644	0.385543	30.2	35.3	27	11.5	A_33_P3256888	Unknown
A_33_P3257179	-0.0429044	Compromised	0.0429044	Compromised	0	0.0344806	Compromised	-1.1877	Compromised	-0.576607	0.445932	6.1	6.38	5.55	2.18	A_33_P3257179	Unknown
A_33_P3257479	-0.0251038	Detected	0.0251038	Detected	0	-0.104179	Detected	-0.691314	Detected	-0.397746	0.309521	24.5	25	20	12.2	A_33_P3257479	Unknown
A_33_P3257755	0.0753667	Detected	-0.0753667	Detected	0	0.0215471	Detected	-0.382984	Detected	-0.180719	0.490564	579	514	481	333	A_33_P3257755	Unknown
A_33_P3258417	-0.209089	Detected	0.209089	Detected	0	0.0340021	Detected	-0.410506	Detected	-0.188252	0.600159	24.3	32	24.8	16.7	A_33_P3258417	Unknown
A_33_P3258561	-0.0449781	Compromised	0.0449781	Compromised	0	0.352526	Compromised	0.532701	Compromised	0.442613	0.0480535	1.84	1.93	2.09	2.17	A_33_P3258561	Unknown
A_33_P3258727	-0.0249581	Compromised	0.0249581	Compromised	0	0.174102	Compromised	0.385815	Compromised	0.279959	0.123561	1.98	2.02	1.96	2.08	A_33_P3258727	Unknown
A_33_P3258732	-0.0575919	Compromised	0.0575914	Compromised	-2.375e-07	0.345717	Compromised	0.541075	Compromised	0.443396	0.0596131	1.78	1.9	2.03	2.13	A_33_P3258732	Unknown
A_33_P3258752	-0.0597324	Compromised	0.0597324	Compromised	0	0.366635	Compromised	0.632118	Compromised	0.499377	0.0754717	1.7	1.82	1.97	2.17	A_33_P3258752	Unknown
A_33_P3258846	-0.225502	Detected	0.225502	Detected	0	-0.0730107	Detected	-0.248994	Detected	-0.161002	0.574403	337	454	323	262	A_33_P3258846	Unknown
A_33_P3259239	0.47186	Compromised	-0.47186	Compromised	2.35e-07	-0.84574	Compromised	1.01101	Compromised	0.0826365	0.943979	6.07	3.11	2.1	6.97	A_33_P3259239	Unknown
A_33_P3259303	-0.0597324	Compromised	0.0597324	Compromised	0	0.359293	Compromised	0.612034	Compromised	0.485664	0.0737814	1.7	1.82	1.96	2.14	A_33_P3259303	Unknown
A_33_P3259560	0.00361395	Detected	-0.00361371	Detected	1.192e-07	0.0699789	Compromised	-0.816502	Compromised	-0.373261	0.488382	10.3	10.1	9.3	4.61	A_33_P3259560	Unknown
A_33_P3259750	-0.051527	Compromised	0.0515275	Compromised	2.385e-07	0.373684	Compromised	0.645098	Compromised	0.509391	0.0724877	1.71	1.81	1.98	2.19	A_33_P3259750	Unknown
A_33_P3259954	-0.029171	Compromised	0.0291715	Compromised	2.385e-07	0.335027	Compromised	0.481283	Compromised	0.408155	0.0352532	1.91	1.96	2.12	2.15	A_33_P3259954	Unknown
A_33_P3260021	-0.127764	Detected	0.127764	Detected	0	-0.133623	Detected	-0.684395	Detected	-0.409009	0.310234	25.5	30	21.9	13.7	A_33_P3260021	Unknown
A_33_P3260034	-0.0343397	Detected	0.0343397	Detected	0	-0.403176	Detected	-0.90259	Detected	-0.652883	0.122299	29.8	30.8	19.9	12.9	A_33_P3260034	Unknown
A_33_P3260263	0.110262	Compromised	-0.110262	Compromised	0	0.126777	Compromised	0.330763	Compromised	0.22877	0.267186	2.27	1.92	1.98	2.09	A_33_P3260263	Unknown
A_33_P3260455	0.0897358	Detected	-0.0897358	Detected	0	-0.161644	Detected	-0.167702	Detected	-0.164673	0.208088	1310	1140	949	866	A_33_P3260455	Unknown
A_33_P3260868	-0.0634646	Compromised	0.0634651	Compromised	2.4e-07	0.322606	Compromised	0.395641	Compromised	0.359123	0.0391457	1.97	2.12	2.22	2.14	A_33_P3260868	Unknown
A_33_P3261024	-0.237679	Compromised	0.237679	Compromised	0	-0.0206594	Compromised	-0.518202	Compromised	-0.269431	0.51558	4.35	5.96	4.36	2.83	A_33_P3261024	Unknown
A_33_P3261074	0.311875	Compromised	-0.311876	Compromised	-2.4e-07	0.90056	Compromised	1.28498	Compromised	1.09277	0.0964116	2.83	1.81	3.67	4.39	A_33_P3261074	Unknown
A_33_P3261097	0.260483	Detected	-0.260482	Compromised	1.25e-07	-0.037524	Detected	-0.836398	Compromised	-0.436961	0.45623	14.4	9.89	10.1	5.32	A_33_P3261097	Unknown
A_33_P3261192	-0.239492	Compromised	0.239492	Compromised	0	0.182322	Compromised	0.412142	Compromised	0.297232	0.379511	1.74	2.39	2.01	2.16	A_33_P3261192	Unknown
A_33_P3261308	-0.202317	Compromised	0.202317	Compromised	2.4e-07	0.0475497	Compromised	0.69523	Compromised	0.37139	0.433333	1.97	2.57	2.02	2.9	A_33_P3261308	Unknown
A_33_P3261428	-0.0246062	Compromised	0.0246062	Compromised	0	0.258475	Compromised	0.457103	Compromised	0.357789	0.072944	2.03	2.07	2.13	2.24	A_33_P3261428	Unknown
A_33_P3261640	0.304228	Detected	-0.304228	Detected	0	-0.4882	Detected	-0.472921	Detected	-0.480561	0.255069	70.7	45.7	35.2	32.6	A_33_P3261640	Unknown
A_33_P3261706	-0.219757	Compromised	0.219757	Compromised	-2.4e-07	0.0410352	Compromised	0.256815	Compromised	0.148925	0.604856	2.11	2.82	2.18	2.32	A_33_P3261706	Unknown
A_33_P3262022	-0.213387	Detected	0.213387	Detected	0	-0.480651	Detected	-0.705425	Detected	-0.593038	0.13314	19.4	25.7	13.9	10.9	A_33_P3262022	Unknown
A_33_P3262074	-0.0711241	Compromised	0.0711236	Compromised	-2.4e-07	0.400651	Compromised	0.858478	Compromised	0.629565	0.11953	1.94	2.11	2.32	2.92	A_33_P3262074	Unknown
A_33_P3262108	-0.208551	Compromised	0.208551	Compromised	-2.35e-07	-0.567279	Compromised	-0.0221071	Compromised	-0.294693	0.481024	5.16	6.79	3.47	4.64	A_33_P3262108	Unknown
A_33_P3262128	-0.0471549	Compromised	0.0471554	Compromised	2.385e-07	0.336477	Compromised	0.469124	Compromised	0.402801	0.0384761	1.92	2.02	2.16	2.17	A_33_P3262128	Unknown
A_33_P3262167	-0.391833	Compromised	0.391833	Compromised	0	-1.26352	Compromised	-0.468286	Compromised	-0.865902	0.261032	4.35	7.38	2.05	3.26	A_33_P3262167	Unknown
A_33_P3262217	-0.166297	Compromised	0.166297	Compromised	0	0.579631	Compromised	0.334247	Compromised	0.456939	0.157577	1.95	2.42	2.82	2.18	A_33_P3262217	Unknown
A_33_P3262327	0.0867779	Detected	-0.0867779	Detected	0	0.0609806	Detected	-0.516736	Detected	-0.227878	0.528787	52.3	45.7	44.3	27.2	A_33_P3262327	Unknown
A_33_P3262366	-0.0510669	Compromised	0.0510664	Compromised	-2.375e-07	0.357368	Compromised	0.568241	Compromised	0.462805	0.0585099	1.73	1.83	1.98	2.1	A_33_P3262366	Unknown
A_33_P3262440	-0.173064	Compromised	0.173065	Detected	1.2e-07	-0.850423	Compromised	-1.47605	Compromised	-1.16324	0.0828786	9.18	11.5	4.95	2.94	A_33_P3262440	Unknown
A_33_P3262537	-0.379014	Compromised	0.379014	Detected	0	-0.0218148	Compromised	-1.58247	Compromised	-0.80214	0.45276	6.12	10.2	6.76	2.1	A_33_P3262537	Unknown
A_33_P3262600	-0.0570855	Compromised	0.0570855	Compromised	0	0.330104	Compromised	1.27457	Compromised	0.802336	0.233701	1.8	1.92	2.03	3.58	A_33_P3262600	Unknown
A_33_P3262704	-0.0351043	Compromised	0.0351047	Compromised	2.375e-07	0.248312	Compromised	0.434277	Compromised	0.341294	0.0753449	2.02	2.09	2.12	2.21	A_33_P3262704	Unknown
A_33_P3263198	0.121304	Compromised	-0.121304	Compromised	0	-1.38097	Compromised	-1.59394	Compromised	-1.48746	0.0115716	9.1	7.58	2.77	2.19	A_33_P3263198	Unknown
A_33_P3263202	-0.0528622	Compromised	0.0528617	Compromised	-2.385e-07	0.275102	Compromised	0.486393	Compromised	0.380747	0.0842738	1.82	1.93	1.97	2.09	A_33_P3263202	Unknown
A_33_P3263274	0.0667152	Detected	-0.0667157	Detected	-2.4e-07	-0.104411	Detected	0.212888	Detected	0.0542383	0.782494	7090	6370	5430	6200	A_33_P3263274	Unknown
A_33_P3263293	0.0697012	Compromised	-0.0697017	Compromised	-2.375e-07	-0.234785	Compromised	-0.0519395	Compromised	-0.143362	0.338618	2.85	2.55	1.99	2.07	A_33_P3263293	Unknown
A_33_P3263512	-0.0649977	Detected	0.0649982	Detected	2.4e-07	-0.201788	Detected	-0.127204	Detected	-0.164496	0.159352	10200	11000	8000	7720	A_33_P3263512	Unknown
A_33_P3263747	-0.0504575	Detected	0.0504575	Detected	0	0.0911002	Detected	-0.167855	Detected	-0.0383775	0.808337	123	130	117	89.6	A_33_P3263747	Unknown
A_33_P3263989	-0.017904	Detected	0.017904	Detected	0	0.000331163	Detected	0.219424	Detected	0.109877	0.426561	292	295	255	272	A_33_P3263989	Unknown
A_33_P3264399	-0.0604234	Compromised	0.0604239	Compromised	2.38e-07	0.0761156	Compromised	-0.0720758	Compromised	0.00201988	0.985065	7.68	8.23	7.28	6.02	A_33_P3264399	Unknown
A_33_P3264424	0.128032	Detected	-0.128032	Detected	0	-0.564309	Detected	-0.312584	Detected	-0.438447	0.13463	107	88.3	57.1	62.3	A_33_P3264424	Unknown
A_33_P3264533	0.444126	Compromised	-0.444126	Compromised	0	-0.459797	Compromised	-0.272122	Compromised	-0.36596	0.504751	4.47	2.38	2.06	2.15	A_33_P3264533	Unknown
A_33_P3264746	-0.0521009	Detected	0.0521009	Detected	0	0.0733788	Detected	-0.18058	Detected	-0.0536005	0.733819	1180	1250	1110	853	A_33_P3264746	Unknown
A_33_P3264940	0.139565	Compromised	-0.139565	Compromised	-2.4e-07	-0.887487	Compromised	-0.800853	Compromised	-0.84417	0.0286835	5.27	4.28	2.23	2.17	A_33_P3264940	Unknown
A_33_P3264955	0.0806344	Detected	-0.0806344	Detected	0	-0.436051	Detected	-0.459645	Detected	-0.447848	0.0315526	2190	1930	1320	1190	A_33_P3264955	Unknown
A_33_P3264960	-0.280815	Detected	0.280815	Detected	0	0.0483692	Detected	0.643838	Detected	0.346104	0.486785	13.2	19.2	14.3	19.8	A_33_P3264960	Unknown
A_33_P3265205	0.14924	Compromised	-0.14924	Compromised	-2.4e-07	-1.05273	Compromised	-1.16451	Compromised	-1.10862	0.0200446	7.55	6.05	2.83	2.4	A_33_P3265205	Unknown
A_33_P3265249	-0.0349855	Compromised	0.0349855	Compromised	0	0.199886	Compromised	0.387562	Compromised	0.293724	0.0992468	2.03	2.1	2.06	2.15	A_33_P3265249	Unknown
A_33_P3265254	-0.0501156	Compromised	0.0501156	Compromised	0	1.96777	Compromised	1.45043	Compromised	1.7091	0.0229515	1.95	2.06	6.81	4.36	A_33_P3265254	Unknown
A_33_P3265260	-0.485811	Compromised	0.485811	Compromised	0	-0.74632	Compromised	0.303042	Compromised	-0.221639	0.785907	2.82	5.45	2.03	3.85	A_33_P3265260	Unknown
A_33_P3265264	-0.0214882	Compromised	0.0214877	Compromised	-2.385e-07	0.277948	Compromised	0.504392	Compromised	0.39117	0.0769148	1.96	1.99	2.08	2.23	A_33_P3265264	Unknown
A_33_P3265419	-0.00598907	Compromised	0.00598907	Compromised	0	0.830413	Compromised	-0.805615	Compromised	0.0123992	0.989283	4.78	4.75	7.36	2.17	A_33_P3265419	Unknown
A_33_P3265539	-0.0502479	Detected	0.0502479	Detected	0	-1.2902	Compromised	-0.522002	Compromised	-0.906101	0.144248	10.6	11.2	3.87	6.04	A_33_P3265539	Unknown
A_33_P3265624	-0.0491147	Compromised	0.0491147	Compromised	0	0.315009	Compromised	0.557568	Compromised	0.436289	0.079383	1.82	1.92	2.02	2.19	A_33_P3265624	Unknown
A_33_P3265866	-0.071526	Detected	0.071526	Detected	0	-1.88639	Detected	-1.85582	Detected	-1.87111	0.00152449	102	111	25	23.4	A_33_P3265866	Unknown
A_33_P3265935	0.275476	Compromised	-0.275477	Compromised	-2.35e-07	-0.608067	Compromised	0.891149	Compromised	0.141541	0.875652	7.21	4.85	3.37	8.73	A_33_P3265935	Unknown
A_33_P3266022	0.107772	Detected	-0.107772	Detected	0	0.161371	Detected	0.347061	Detected	0.254216	0.215831	23.8	20.2	21.3	22.2	A_33_P3266022	Unknown
A_33_P3266091	-0.0178537	Compromised	0.0178542	Compromised	2.385e-07	0.829071	Compromised	0.435047	Compromised	0.632059	0.0855689	1.96	1.98	3.04	2.12	A_33_P3266091	Unknown
A_33_P3266195	-0.161453	Compromised	0.161453	Detected	-1.2e-07	-1.9882	Compromised	-1.86907	Compromised	-1.92863	0.00786798	8.68	10.7	2.11	2.1	A_33_P3266195	Unknown
A_33_P3266609	-0.238228	Compromised	0.238228	Detected	0	0.124408	Compromised	0.710103	Detected	0.417256	0.384205	8.46	11.6	9.38	12.9	A_33_P3266609	Unknown
A_33_P3266614	0.167866	Detected	-0.167866	Detected	0	0.452734	Detected	0.499428	Detected	0.476081	0.106809	1780	1390	1870	1770	A_33_P3266614	Unknown
A_33_P3266889	-0.167684	Compromised	0.167684	Detected	0	0.500054	Detected	-0.254734	Compromised	0.12266	0.79446	9.49	11.8	13	7.06	A_33_P3266889	Unknown
A_33_P3267150	0.116628	Detected	-0.116628	Detected	0	-0.0606172	Detected	-0.315058	Detected	-0.187837	0.390116	19.8	16.6	15.1	11.6	A_33_P3267150	Unknown
A_33_P3268161	-0.0347505	Compromised	0.0347509	Compromised	2.4e-07	0.199916	Compromised	0.380347	Compromised	0.290132	0.0954094	2.05	2.12	2.08	2.16	A_33_P3268161	Unknown
A_33_P3268167	0.0200694	Detected	-0.0200694	Detected	0	-0.13143	Detected	-0.730587	Detected	-0.431008	0.287632	313	300	243	147	A_33_P3268167	Unknown
A_33_P3268219	-0.073797	Detected	0.0737967	Detected	-1.2e-07	-0.0120931	Compromised	-1.80305	Compromised	-0.907574	0.418789	12	13.1	10.8	2.86	A_33_P3268219	Unknown
A_33_P3268294	-0.872658	Compromised	0.872658	Compromised	2.25e-07	-0.454751	Compromised	-0.195932	Compromised	-0.325342	0.747668	1.71	5.65	1.97	2.16	A_33_P3268294	Unknown
A_33_P3268318	-0.0904024	Detected	0.0904024	Detected	0	0.0483429	Detected	0.188681	Detected	0.118512	0.409193	31.6	35.3	30	30.3	A_33_P3268318	Unknown
A_33_P3268395	0.976199	Compromised	-0.976198	Compromised	2.5e-07	0.355999	Compromised	-0.507822	Compromised	-0.0759115	0.949779	7.54	1.92	4.23	2.13	A_33_P3268395	Unknown
A_33_P3269373	-0.0513372	Compromised	0.0513377	Compromised	2.39e-07	0.321226	Compromised	0.474303	Compromised	0.397765	0.0497146	1.89	2	2.11	2.15	A_33_P3269373	Unknown
A_33_P3269380	0.0949175	Detected	-0.0949175	Detected	0	0.0328381	Detected	-1.15614	Detected	-0.561649	0.449337	50	43.2	41.3	16.6	A_33_P3269380	Unknown
A_33_P3269528	0.120987	Detected	-0.120987	Compromised	0	0.114304	Compromised	-1.95436	Compromised	-0.920029	0.470181	12	10	10.3	2.25	A_33_P3269528	Unknown
A_33_P3270417	-0.0889587	Compromised	0.0889587	Compromised	0	-1.55377	Compromised	-1.37911	Compromised	-1.46644	0.007149	6.53	7.28	2.04	2.11	A_33_P3270417	Unknown
A_33_P3270474	-0.0769486	Compromised	0.0769486	Compromised	0	0.35391	Compromised	0.415477	Compromised	0.384694	0.0434134	1.97	2.16	2.29	2.19	A_33_P3270474	Unknown
A_33_P3270593	-0.129576	Detected	0.129576	Detected	0	-0.129868	Detected	-0.237919	Detected	-0.183893	0.32047	45.7	53.9	39.4	33.5	A_33_P3270593	Unknown
A_33_P3270639	0.0328252	Detected	-0.032825	Detected	1.185e-07	0.234459	Detected	-1.39278	Compromised	-0.57916	0.550692	12	11.3	11.9	3.53	A_33_P3270639	Unknown
A_33_P3271038	0.203477	Compromised	-0.203477	Compromised	2.4e-07	-1.35612	Compromised	-1.13749	Compromised	-1.24681	0.0326495	6.7	4.98	1.96	2.09	A_33_P3271038	Unknown
A_33_P3271121	0.0130446	Detected	-0.0130446	Detected	0	-0.237036	Detected	-0.101487	Detected	-0.169261	0.133717	622	602	451	454	A_33_P3271121	Unknown
A_33_P3271126	0.0697582	Detected	-0.0697582	Detected	0	-0.120077	Detected	-0.317931	Detected	-0.219004	0.212135	750	671	567	453	A_33_P3271126	Unknown
A_33_P3271187	-0.225723	Detected	0.225723	Detected	0	-0.558911	Detected	-1.01002	Compromised	-0.784467	0.133194	18.7	25.2	12.8	8.58	A_33_P3271187	Unknown
A_33_P3271885	-0.125271	Detected	0.125272	Detected	1.2e-07	-0.747178	Compromised	-0.1727	Compromised	-0.459939	0.279886	11.6	13.6	6.5	8.87	A_33_P3271885	Unknown
A_33_P3272456	-0.089015	Compromised	0.0890155	Compromised	2.37e-07	0.281661	Compromised	0.480157	Compromised	0.380909	0.103779	1.74	1.94	1.94	2.04	A_33_P3272456	Unknown
A_33_P3272513	0.0134799	Detected	-0.0134799	Detected	0	-0.351349	Detected	-0.523447	Detected	-0.437398	0.0374396	33.6	32.5	22.5	18.3	A_33_P3272513	Unknown
A_33_P3272668	-0.0501752	Compromised	0.0501752	Compromised	0	0.368351	Compromised	0.576797	Compromised	0.472574	0.0550146	1.77	1.87	2.04	2.16	A_33_P3272668	Unknown
A_33_P3272952	0.416085	Detected	-0.416085	Compromised	-1.2e-07	-1.34543	Compromised	-0.111894	Compromised	-0.728662	0.430665	12.7	7.03	3.23	6.96	A_33_P3272952	Unknown
A_33_P3273118	-0.0702386	Compromised	0.0702381	Compromised	-2.4e-07	0.328772	Compromised	1.08619	Compromised	0.707482	0.207643	1.97	2.14	2.24	3.47	A_33_P3273118	Unknown
A_33_P3273752	0.492913	Compromised	-0.492912	Compromised	2.35e-07	-0.155877	Compromised	-0.0487528	Compromised	-0.102315	0.855612	4.2	2.09	2.31	2.28	A_33_P3273752	Unknown
A_33_P3273767	0.170754	Compromised	-0.170754	Compromised	0	0.0844755	Compromised	0.196784	Compromised	0.14063	0.515925	2.61	2.03	2.12	2.1	A_33_P3273767	Unknown
A_33_P3273802	-0.0512953	Compromised	0.0512958	Compromised	2.385e-07	0.350857	Compromised	1.90379	Compromised	1.12732	0.284426	1.72	1.82	1.96	5.27	A_33_P3273802	Unknown
A_33_P3274001	-0.0323911	Detected	0.0323911	Detected	0	-0.433548	Detected	-0.471366	Detected	-0.452457	0.00680154	58.5	60.3	38.2	34.1	A_33_P3274001	Unknown
A_33_P3274006	-0.0495319	Compromised	0.0495319	Compromised	0	0.330533	Compromised	0.573092	Compromised	0.451813	0.0747659	1.8	1.9	2.02	2.19	A_33_P3274006	Unknown
A_33_P3274080	0.0740755	Detected	-0.0740755	Detected	0	-0.174265	Detected	-0.0535281	Detected	-0.113897	0.355554	75.9	67.5	55.1	54.9	A_33_P3274080	Unknown
A_33_P3274090	0.0786381	Detected	-0.0786381	Detected	0	-0.980115	Compromised	0.22728	Detected	-0.376417	0.599411	12.9	11.4	5.34	11.3	A_33_P3274090	Unknown
A_33_P3274184	-0.138137	Compromised	0.138137	Detected	0	-0.592838	Compromised	-1.12121	Compromised	-0.857024	0.1027	8.63	10.3	5.43	3.45	A_33_P3274184	Unknown
A_33_P3274189	0.225446	Detected	-0.225446	Detected	0	-0.0180538	Detected	-0.195775	Detected	-0.106915	0.702181	40.5	29.2	29.5	23.9	A_33_P3274189	Unknown
A_33_P3274204	-0.0440874	Compromised	0.0440879	Compromised	2.385e-07	0.236733	Compromised	0.447606	Compromised	0.34217	0.0957921	1.89	1.98	1.98	2.1	A_33_P3274204	Unknown
A_33_P3274209	-0.800685	Compromised	0.800685	Compromised	-2.5e-07	-0.559366	Compromised	-0.386298	Compromised	-0.472832	0.616576	2.07	6.19	2.11	2.18	A_33_P3274209	Unknown
A_33_P3274763	0.310142	Compromised	-0.310142	Compromised	0	0.694332	Compromised	2.31306	Compromised	1.5037	0.224901	2.87	1.84	3.23	9.09	A_33_P3274763	Unknown
A_33_P3275163	-0.0483336	Detected	0.0483336	Detected	0	0.10804	Detected	0.127108	Detected	0.117574	0.139701	53.9	56.8	51.8	48.1	A_33_P3275163	Unknown
A_33_P3275415	0.0459023	Detected	-0.0459023	Detected	0	0.599756	Detected	0.564602	Detected	0.582179	0.00705283	59.8	55.3	75.7	67.7	A_33_P3275415	Unknown
A_33_P3275651	0.068964	Compromised	-0.068964	Compromised	0	0.132061	Compromised	0.0160232	Compromised	0.0740423	0.497678	5.75	5.15	5.18	4.38	A_33_P3275651	Unknown
A_33_P3275826	0.0339727	Detected	-0.0339727	Detected	0	0.24768	Detected	0.0393505	Detected	0.143515	0.320477	117000	110000	117000	92800	A_33_P3275826	Unknown
A_33_P3276062	0.010221	Compromised	-0.010221	Compromised	0	-0.470602	Compromised	-1.23075	Compromised	-0.850677	0.154705	6.7	6.51	4.14	2.24	A_33_P3276062	Unknown
A_33_P3276087	-0.530235	Compromised	0.530235	Compromised	0	-0.759957	Compromised	-0.121213	Compromised	-0.440585	0.550426	3.25	6.68	2.39	3.41	A_33_P3276087	Unknown
A_33_P3276217	-0.0389619	Compromised	0.0389619	Compromised	0	0.217601	Compromised	0.412297	Compromised	0.314949	0.0952662	1.99	2.07	2.05	2.15	A_33_P3276217	Unknown
A_33_P3276222	0.0929062	Detected	-0.0929062	Detected	0	-0.738125	Detected	-0.597074	Detected	-0.667599	0.0291963	786	681	381	385	A_33_P3276222	Unknown
A_33_P3276376	-0.0736012	Compromised	0.0736012	Compromised	0	2.0079	Compromised	0.96145	Compromised	1.48468	0.106755	1.97	2.15	7.19	3.19	A_33_P3276376	Unknown
A_33_P3276758	-0.186452	Detected	0.186452	Detected	0	0.00649548	Detected	-1.15332	Compromised	-0.57341	0.445899	21	26.8	20.7	8.49	A_33_P3276758	Unknown
A_33_P3276805	-0.0467062	Compromised	0.0467062	Compromised	0	0.359646	Compromised	0.556018	Compromised	0.457832	0.0520368	1.75	1.84	2	2.1	A_33_P3276805	Unknown
A_33_P3276808	-0.134941	Compromised	0.134941	Compromised	2.4e-07	0.355876	Compromised	0.615538	Compromised	0.485707	0.122021	1.7	2.02	2.06	2.26	A_33_P3276808	Unknown
A_33_P3276868	-0.0642538	Compromised	0.0642538	Compromised	0	0.324327	Compromised	0.719918	Compromised	0.522123	0.128724	1.94	2.09	2.19	2.64	A_33_P3276868	Unknown
A_33_P3276927	0.543937	Detected	-0.543937	Detected	0	0.0778215	Detected	-0.397887	Detected	-0.160033	0.812759	132	61.2	82.4	54.3	A_33_P3276927	Unknown
A_33_P3277043	0.388652	Compromised	-0.388652	Compromised	-1.1e-07	-1.26539	Compromised	-1.22621	Compromised	-1.2458	0.0852764	10	5.75	2.74	2.58	A_33_P3277043	Unknown
A_33_P3277060	0.185078	Detected	-0.185078	Compromised	1.15e-07	-0.801888	Compromised	-0.705653	Compromised	-0.753771	0.0587483	9.01	6.87	3.92	3.84	A_33_P3277060	Unknown
A_33_P3277228	0.696028	Compromised	-0.696028	Compromised	0	0.544418	Compromised	-0.809592	Compromised	-0.132587	0.903891	7.51	2.82	5.83	2.09	A_33_P3277228	Unknown
A_33_P3277378	0.230487	Detected	-0.230487	Compromised	0	-0.0126636	Compromised	-1.81368	Compromised	-0.913171	0.429486	11.9	8.52	8.67	2.28	A_33_P3277378	Unknown
A_33_P3277679	0.00671339	Detected	-0.00671339	Detected	0	-0.588355	Compromised	-0.65587	Compromised	-0.622113	0.00304686	12.7	12.4	7.25	6.34	A_33_P3277679	Unknown
A_33_P3277758	0.160364	Detected	-0.160363	Detected	1.15e-07	0.328267	Detected	-0.0209746	Compromised	0.153646	0.583407	12.8	10.1	12.4	8.92	A_33_P3277758	Unknown
A_33_P3277805	0.0525143	Detected	-0.0525143	Detected	0	-0.36871	Detected	-0.950334	Detected	-0.659522	0.155311	705	646	454	278	A_33_P3277805	Unknown
A_33_P3277952	0.527575	Compromised	-0.527575	Compromised	0	-0.307961	Compromised	0.625376	Compromised	0.158707	0.842657	4.47	2.12	2.16	3.78	A_33_P3277952	Unknown
A_33_P3278152	-0.013063	Detected	0.013063	Detected	0	0.0697212	Detected	-0.487934	Detected	-0.209106	0.531905	85.3	85.6	77.9	48.5	A_33_P3278152	Unknown
A_33_P3278159	-0.0594728	Detected	0.0594728	Detected	0	-0.186952	Detected	-0.0271547	Detected	-0.107054	0.394918	641	686	506	518	A_33_P3278159	Unknown
A_33_P3278303	-0.177634	Detected	0.177634	Detected	0	-0.113193	Detected	-0.558562	Detected	-0.335877	0.359621	234	295	211	142	A_33_P3278303	Unknown
A_33_P3278684	0.498543	Detected	-0.498543	Compromised	0	-1.39536	Compromised	0.0398669	Compromised	-0.677746	0.519119	12.8	6.32	2.97	7.36	A_33_P3278684	Unknown
A_33_P3278714	-0.12494	Detected	0.12494	Detected	0	0.283524	Detected	-0.575797	Detected	-0.146136	0.774986	25.6	30	29.3	14.8	A_33_P3278714	Unknown
A_33_P3278896	-0.0163953	Detected	0.0163953	Detected	0	0.237954	Detected	-0.318723	Detected	-0.0403843	0.898116	24.5	24.7	25.2	15.7	A_33_P3278896	Unknown
A_33_P3279181	0.154245	Compromised	-0.154245	Compromised	0	0.654864	Compromised	-0.394541	Compromised	0.130161	0.834045	7.59	6.04	9.26	4.1	A_33_P3279181	Unknown
A_33_P3279381	-0.0316448	Compromised	0.0316448	Compromised	0	0.251771	Compromised	0.44425	Compromised	0.34801	0.075297	2.02	2.08	2.12	2.22	A_33_P3279381	Unknown
A_33_P3279388	-0.0560174	Compromised	0.0560174	Compromised	0	0.386167	Compromised	0.65758	Compromised	0.521873	0.0708353	1.69	1.8	1.98	2.19	A_33_P3279388	Unknown
A_33_P3279392	0.0988393	Compromised	-0.0988393	Compromised	0	0.987873	Compromised	0.161161	Compromised	0.574517	0.30903	2.63	2.26	4.2	2.17	A_33_P3279392	Unknown
A_33_P3279456	0.0369883	Detected	-0.0369878	Detected	2.4e-07	0.0478783	Detected	-0.150337	Detected	-0.0512295	0.67603	5490	5140	4770	3810	A_33_P3279456	Unknown
A_33_P3279505	-0.799975	Compromised	0.799974	Compromised	-2.3e-07	-0.746376	Compromised	-0.613636	Compromised	-0.680006	0.486131	2.38	7.11	2.13	2.14	A_33_P3279505	Unknown
A_33_P3279984	-0.211182	Compromised	0.211182	Compromised	0	0.217084	Compromised	-0.159131	Compromised	0.0289769	0.927739	3.43	4.53	3.98	2.81	A_33_P3279984	Unknown
A_33_P3280325	-0.770366	Compromised	0.770366	Compromised	0	-0.676399	Compromised	-0.356037	Compromised	-0.516218	0.579172	2.26	6.48	2.08	2.38	A_33_P3280325	Unknown
A_33_P3280355	0.153412	Detected	-0.153412	Detected	-2.35e-07	-0.18648	Detected	-0.4494	Detected	-0.31794	0.256207	18200	14500	12400	9470	A_33_P3280355	Unknown
A_33_P3280412	0.127087	Compromised	-0.127087	Compromised	0	-0.574426	Compromised	-0.385403	Compromised	-0.479914	0.0938312	7.6	6.28	4.03	4.21	A_33_P3280412	Unknown
A_33_P3280502	0.149599	Detected	-0.149599	Detected	0	0.0922341	Detected	0.326859	Detected	0.209546	0.385264	21.6	17.3	17.9	19.3	A_33_P3280502	Unknown
A_33_P3280709	1.11816	Detected	-1.11816	Compromised	1e-07	-0.845144	Compromised	-0.351074	Compromised	-0.598109	0.653546	9.18	1.92	2.03	2.62	A_33_P3280709	Unknown
A_33_P3280974	0.329402	Compromised	-0.329402	Compromised	0	-0.136756	Compromised	0.0796423	Compromised	-0.0285571	0.941858	3.22	2.01	2.01	2.14	A_33_P3280974	Unknown
A_33_P3281176	-0.185375	Detected	0.185375	Detected	0	-0.233054	Detected	-0.177955	Detected	-0.205505	0.387243	35	44.6	29.2	27.8	A_33_P3281176	Unknown
A_33_P3281303	0.0839207	Detected	-0.0839207	Detected	0	0.0936968	Detected	-0.109821	Detected	-0.00806225	0.956819	22	19.3	19.1	15.2	A_33_P3281303	Unknown
A_33_P3281373	0.141072	Compromised	-0.141072	Compromised	0	-0.0915651	Compromised	-0.465894	Compromised	-0.27873	0.356394	8.23	6.67	6.04	4.27	A_33_P3281373	Unknown
A_33_P3281478	0.0384572	Detected	-0.0384572	Detected	0	-0.0734119	Detected	-0.592998	Compromised	-0.333205	0.332211	19.8	18.5	15.8	10.1	A_33_P3281478	Unknown
A_33_P3281563	-0.581931	Compromised	0.581931	Compromised	2.3e-07	0.406601	Compromised	-0.00444317	Compromised	0.201079	0.775495	1.73	3.82	2.96	2.04	A_33_P3281563	Unknown
A_33_P3281728	-0.819222	Compromised	0.819223	Compromised	2.25e-07	-0.465034	Compromised	-0.266539	Compromised	-0.365787	0.700913	1.76	5.4	1.94	2.04	A_33_P3281728	Unknown
A_33_P3281765	-0.0122752	Compromised	0.0122752	Compromised	0	-0.566725	Compromised	-0.175231	Compromised	-0.370978	0.199109	8.26	8.28	4.85	5.83	A_33_P3281765	Unknown
A_33_P3282023	-0.819595	Compromised	0.819595	Compromised	0	-0.439696	Compromised	-0.233745	Compromised	-0.33672	0.723036	1.72	5.28	1.93	2.04	A_33_P3282023	Unknown
A_33_P3282213	0.0610664	Detected	-0.0610666	Detected	-1.19e-07	0.216826	Detected	-0.187048	Compromised	0.0148889	0.950158	12.7	11.5	12.2	8.45	A_33_P3282213	Unknown
A_33_P3282354	0.471347	Compromised	-0.471348	Compromised	-2.35e-07	-0.203601	Compromised	-0.444675	Compromised	-0.324138	0.57382	5.11	2.62	2.76	2.14	A_33_P3282354	Unknown
A_33_P3282624	-0.0495319	Compromised	0.0495319	Compromised	0	0.322721	Compromised	0.422353	Compromised	0.372537	0.0337683	1.98	2.09	2.21	2.17	A_33_P3282624	Unknown
A_33_P3282649	-0.181584	Detected	0.181584	Detected	-1.2e-07	-0.61664	Compromised	-1.14078	Compromised	-0.878712	0.110296	9.94	12.6	6.34	4.04	A_33_P3282649	Unknown
A_33_P3282744	-0.0528622	Compromised	0.0528617	Compromised	-2.385e-07	0.332531	Compromised	0.520501	Compromised	0.426516	0.0583766	1.82	1.93	2.05	2.14	A_33_P3282744	Unknown
A_33_P3283064	-0.000976324	Detected	0.000976324	Detected	0	0.0416186	Detected	-0.101859	Detected	-0.0301204	0.715416	152	150	135	112	A_33_P3283064	Unknown
A_33_P3283117	0.467578	Compromised	-0.467578	Compromised	0	0.877462	Compromised	0.128388	Compromised	0.502925	0.489554	3.57	1.84	4.09	2.23	A_33_P3283117	Unknown
A_33_P3283167	0.0189161	Detected	-0.0189166	Detected	-2.385e-07	-0.261486	Detected	-0.362418	Detected	-0.311952	0.0285751	3000	2880	2130	1820	A_33_P3283167	Unknown
A_33_P3283350	-0.287542	Compromised	0.287541	Compromised	-2.35e-07	-0.187832	Compromised	-1.07473	Compromised	-0.631281	0.35475	4.87	7.15	4.5	2.23	A_33_P3283350	Unknown
A_33_P3283535	0.0548477	Compromised	-0.0548477	Compromised	0	-0.0667558	Compromised	-1.33697	Compromised	-0.701865	0.385688	7.04	6.43	5.58	2.12	A_33_P3283535	Unknown
A_33_P3283646	-0.357745	Compromised	0.357745	Compromised	2.35e-07	-0.738781	Compromised	-0.486041	Compromised	-0.612411	0.247853	2.96	4.79	1.96	2.14	A_33_P3283646	Unknown
A_33_P3283700	0.961798	Compromised	-0.961797	Compromised	2.3e-07	-0.642975	Compromised	-0.40754	Compromised	-0.525258	0.642087	7.16	1.86	2.03	2.19	A_33_P3283700	Unknown
A_33_P3283734	-0.0302949	Compromised	0.0302949	Compromised	0	0.306269	Compromised	0.511029	Compromised	0.408649	0.0619835	1.8	1.85	1.96	2.07	A_33_P3283734	Unknown
A_33_P3284117	-0.0475311	Compromised	0.0475307	Compromised	-2.39e-07	1.1277	Compromised	0.595406	Compromised	0.861554	0.0859652	1.71	1.8	3.33	2.11	A_33_P3284117	Unknown
A_33_P3284252	-0.0573373	Compromised	0.0573373	Compromised	0	1.10718	Compromised	0.526457	Compromised	0.81682	0.110042	1.79	1.91	3.46	2.12	A_33_P3284252	Unknown
A_33_P3284295	-0.616756	Compromised	0.616756	Compromised	0	-0.355295	Compromised	0.944336	Compromised	0.29452	0.773582	2.08	4.82	2.15	4.85	A_33_P3284295	Unknown
A_33_P3284873	-0.767065	Compromised	0.767065	Compromised	0	-0.050858	Compromised	0.652998	Compromised	0.30107	0.755408	1.92	5.48	2.72	4.06	A_33_P3284873	Unknown
A_33_P3285097	-0.0203452	Detected	0.0203452	Detected	0	-0.324037	Detected	-0.800091	Compromised	-0.562064	0.142917	14.6	14.8	10.2	6.72	A_33_P3285097	Unknown
A_33_P3285371	-0.0503941	Compromised	0.0503945	Compromised	2.375e-07	0.325933	Compromised	0.578057	Compromised	0.451995	0.0795945	1.76	1.86	1.97	2.15	A_33_P3285371	Unknown
A_33_P3285764	-0.725068	Compromised	0.725067	Compromised	-2.3e-07	0.766375	Compromised	0.677701	Compromised	0.722038	0.424979	1.79	4.82	4.34	3.74	A_33_P3285764	Unknown
A_33_P3285769	-0.00237942	Detected	0.00237894	Detected	-2.384e-07	0.0332747	Detected	0.0180817	Detected	0.0256782	0.0841486	26700	26400	23600	21400	A_33_P3285769	Unknown
A_33_P3286101	-0.395664	Compromised	0.395663	Compromised	-2.4e-07	-0.181957	Compromised	0.541143	Compromised	0.179593	0.769447	1.97	3.36	1.97	2.98	A_33_P3286101	Unknown
A_33_P3286162	-0.00618529	Detected	0.00618529	Detected	0	0.335938	Detected	-0.023505	Detected	0.156216	0.476596	333	331	364	260	A_33_P3286162	Unknown
A_33_P3286499	-0.387877	Compromised	0.387877	Compromised	-2.3e-07	-0.648102	Compromised	-0.383291	Compromised	-0.515696	0.335292	2.75	4.64	1.98	2.18	A_33_P3286499	Unknown
A_33_P3286699	0.606753	Compromised	-0.606753	Compromised	0	0.721914	Compromised	0.53429	Compromised	0.628102	0.413887	8.33	3.54	7.78	6.26	A_33_P3286699	Unknown
A_33_P3286709	-1.00736	Compromised	1.00736	Compromised	0	-0.582149	Compromised	0.638992	Compromised	0.0284214	0.982942	1.71	6.81	1.98	4.23	A_33_P3286709	Unknown
A_33_P3287084	0.0881	Detected	-0.0881	Detected	0	-0.105568	Detected	0.182166	Detected	0.0382986	0.841499	31.3	27.3	23.6	26.4	A_33_P3287084	Unknown
A_33_P3287105	-0.073045	Detected	0.073045	Detected	0	-0.533396	Detected	0.0871446	Detected	-0.223126	0.556395	718	783	450	634	A_33_P3287105	Unknown
A_33_P3287238	-0.0352249	Compromised	0.0352244	Compromised	-2.385e-07	0.171287	Compromised	0.78784	Compromised	0.479563	0.262238	2.01	2.08	2	2.81	A_33_P3287238	Unknown
A_33_P3287310	-0.0760567	Detected	0.0760567	Detected	0	0.223551	Detected	-0.573342	Detected	-0.174895	0.708377	65.2	71.4	69.2	36.5	A_33_P3287310	Unknown
A_33_P3287314	0.405182	Compromised	-0.405182	Compromised	0	0.762535	Compromised	0.659036	Compromised	0.710786	0.223969	8.31	4.67	9.18	7.83	A_33_P3287314	Unknown
A_33_P3287388	0.11877	Detected	-0.11877	Detected	0	0.134537	Detected	-0.568926	Detected	-0.217194	0.61773	117	97.8	102	57.4	A_33_P3287388	Unknown
A_33_P3287897	-0.152815	Detected	0.152815	Detected	0	-0.463009	Detected	0.306519	Detected	-0.0782449	0.867536	26.6	32.4	18.5	28.9	A_33_P3287897	Unknown
A_33_P3288079	-0.338799	Compromised	0.338798	Detected	-1.2e-07	-0.00639915	Compromised	-0.842383	Compromised	-0.424391	0.512905	7.93	12.5	8.61	4.42	A_33_P3288079	Unknown
A_33_P3288275	-0.264161	Compromised	0.264161	Compromised	2.35e-07	0.0958648	Compromised	1.35134	Compromised	0.723603	0.399344	1.78	2.53	1.97	4.31	A_33_P3288275	Unknown
A_33_P3288434	-0.0286107	Compromised	0.0286102	Compromised	-2.38e-07	0.263484	Compromised	0.396387	Compromised	0.329935	0.0448726	1.97	2.02	2.08	2.09	A_33_P3288434	Unknown
A_33_P3288814	0.800567	Compromised	-0.800567	Compromised	-2.25e-07	0.904529	Compromised	0.0403929	Compromised	0.472461	0.655276	6.28	2.04	5.82	2.93	A_33_P3288814	Unknown
A_33_P3288919	-0.225437	Compromised	0.225437	Compromised	0	0.200931	Compromised	0.466413	Compromised	0.333672	0.330269	1.7	2.29	1.97	2.17	A_33_P3288919	Unknown
A_33_P3288995	-0.183707	Compromised	0.183706	Compromised	-2.4e-07	-0.0375328	Compromised	-0.453376	Compromised	-0.245454	0.469661	3.28	4.17	3.13	2.15	A_33_P3288995	Unknown
A_33_P3289000	0.393764	Compromised	-0.393764	Compromised	0	-0.0456634	Compromised	1.16321	Compromised	0.558775	0.51962	5.85	3.34	3.72	7.88	A_33_P3289000	Unknown
A_33_P3289093	0.0227966	Compromised	-0.0227966	Compromised	0	-1.35814	Compromised	-1.09996	Compromised	-1.22905	0.0111851	5.98	5.71	1.98	2.17	A_33_P3289093	Unknown
A_33_P3289391	-0.0311177	Detected	0.0311177	Detected	0	0.280152	Detected	-0.383841	Detected	-0.0518446	0.890718	82.9	85.3	88.7	51.3	A_33_P3289391	Unknown
A_33_P3289466	-0.0131302	Detected	0.0131302	Detected	0	0.103643	Detected	-0.32775	Detected	-0.112054	0.65575	27.7	27.8	25.9	17.6	A_33_P3289466	Unknown
A_33_P3289976	0.0382023	Detected	-0.0382023	Detected	0	0.150558	Detected	-0.0108051	Detected	0.0698767	0.515733	39800	37200	37100	30400	A_33_P3289976	Unknown
A_33_P3290149	-0.583172	Compromised	0.583173	Detected	2.5e-07	0.100169	Compromised	-0.00660515	Compromised	0.0467819	0.943603	5.38	11.9	7.45	6.34	A_33_P3290149	Unknown
A_33_P3290610	-0.0501752	Compromised	0.0501752	Compromised	0	0.361262	Compromised	0.556619	Compromised	0.458941	0.0527614	1.77	1.87	2.03	2.13	A_33_P3290610	Unknown
A_33_P3291150	-0.051527	Compromised	0.0515275	Compromised	2.385e-07	0.373684	Compromised	0.625198	Compromised	0.499441	0.06672	1.71	1.81	1.98	2.16	A_33_P3291150	Unknown
A_33_P3291160	0.371563	Detected	-0.371563	Detected	0	-0.249306	Detected	-0.231472	Detected	-0.240389	0.584089	32.1	18.9	18	16.7	A_33_P3291160	Unknown
A_33_P3291662	-0.0591793	Compromised	0.0591793	Compromised	0	0.364887	Compromised	0.602439	Compromised	0.483663	0.0677209	1.72	1.84	1.99	2.15	A_33_P3291662	Unknown
A_33_P3291772	0.37588	Detected	-0.375881	Compromised	-1.2e-07	0.333248	Compromised	-1.86939	Compromised	-0.768072	0.577082	12.9	7.55	10.8	2.15	A_33_P3291772	Unknown
A_33_P3292158	-0.0555019	Compromised	0.0555015	Compromised	-2.39e-07	0.347683	Compromised	0.587435	Compromised	0.467559	0.0713832	1.71	1.82	1.95	2.11	A_33_P3292158	Unknown
A_33_P3292241	0.117389	Detected	-0.117389	Detected	0	-0.290393	Detected	-0.777386	Detected	-0.53389	0.18694	48	40.2	31.2	20.4	A_33_P3292241	Unknown
A_33_P3292994	0.414399	Detected	-0.414399	Compromised	1.25e-07	0.853819	Detected	-0.929578	Compromised	-0.0378793	0.97277	12.4	6.88	14.5	3.86	A_33_P3292994	Unknown
A_33_P3293138	-0.0792825	Detected	0.0792823	Detected	-1.18e-07	-2.24987	Compromised	-0.622409	Compromised	-1.43614	0.221073	13	14.3	2.49	7.05	A_33_P3293138	Unknown
A_33_P3293307	-0.0308995	Detected	0.0308995	Detected	0	-1.1837	Detected	-1.19744	Detected	-1.19057	0.000706138	83.8	86.2	32.5	29.5	A_33_P3293307	Unknown
A_33_P3293466	-0.0636849	Compromised	0.0636854	Compromised	2.4e-07	0.362683	Compromised	0.601324	Compromised	0.482003	0.0705124	1.7	1.83	1.97	2.13	A_33_P3293466	Unknown
A_33_P3293645	0.228091	Detected	-0.228091	Compromised	0	0.235857	Compromised	-0.774138	Compromised	-0.269141	0.675175	10.9	7.83	9.45	4.3	A_33_P3293645	Unknown
A_33_P3293698	-0.145575	Detected	0.145575	Detected	0	-1.33751	Compromised	0.922569	Detected	-0.207469	0.872297	10.2	12.3	3.85	16.9	A_33_P3293698	Unknown
A_33_P3293734	-0.021589	Detected	0.021589	Detected	0	-0.042959	Detected	-0.0544794	Detected	-0.0487192	0.161023	971	986	825	750	A_33_P3293734	Unknown
A_33_P3294078	0.271286	Compromised	-0.271286	Compromised	-2.5e-07	-1.34713	Compromised	0.427946	Compromised	-0.459592	0.669509	7.05	4.77	1.98	6.21	A_33_P3294078	Unknown
A_33_P3294089	0.0836334	Compromised	-0.0836329	Compromised	2.37e-07	-0.204319	Compromised	0.783089	Compromised	0.289385	0.621718	2.86	2.51	2.02	3.67	A_33_P3294089	Unknown
A_33_P3294103	-0.653971	Compromised	0.653971	Compromised	0	-0.440264	Compromised	-0.359878	Compromised	-0.400071	0.603607	2.25	5.49	2.25	2.18	A_33_P3294103	Unknown
A_33_P3294314	0.357029	Compromised	-0.35703	Compromised	-2.3e-07	0.781611	Compromised	-0.560235	Compromised	0.110688	0.897558	5.21	3.13	6.03	2.18	A_33_P3294314	Unknown
A_33_P3294342	-0.0288868	Compromised	0.0288863	Compromised	-2.385e-07	0.221532	Compromised	0.425136	Compromised	0.323334	0.0924923	1.94	1.99	1.99	2.1	A_33_P3294342	Unknown
A_33_P3294415	0.331718	Detected	-0.331718	Compromised	0	0.301499	Detected	-1.63458	Compromised	-0.666539	0.581656	13.5	8.4	11.4	2.73	A_33_P3294415	Unknown
A_33_P3294730	-0.0401287	Compromised	0.0401282	Compromised	-2.39e-07	0.225506	Compromised	0.429492	Compromised	0.327499	0.0961246	1.91	1.99	1.98	2.09	A_33_P3294730	Unknown
A_33_P3295077	-0.249858	Detected	0.249857	Detected	-1.15e-07	0.0554798	Detected	0.00458527	Detected	0.0300325	0.915745	12.2	17	13	11.5	A_33_P3295077	Unknown
A_33_P3295623	-0.404295	Compromised	0.404295	Compromised	0	-0.770963	Compromised	0.933096	Compromised	0.0810664	0.93933	3.14	5.42	2.1	6.27	A_33_P3295623	Unknown
A_33_P3295705	0.0370479	Detected	-0.0370479	Detected	0	-0.184893	Detected	-0.718419	Detected	-0.451656	0.235538	37.6	35.2	27.8	17.6	A_33_P3295705	Unknown
A_33_P3295814	-0.0644014	Detected	0.0644014	Detected	0	0.0349529	Detected	-0.799931	Detected	-0.382489	0.460752	74.8	80.6	69.1	35.5	A_33_P3295814	Unknown
A_33_P3295932	-0.0330358	Detected	0.0330358	Detected	0	0.259743	Detected	-0.0486765	Detected	0.105533	0.572292	28.4	29.3	30	22.2	A_33_P3295932	Unknown
A_33_P3296099	-0.357538	Compromised	0.357538	Compromised	0	0.353001	Compromised	-0.228002	Compromised	0.0624995	0.904506	4.5	7.28	6.35	3.89	A_33_P3296099	Unknown
A_33_P3296313	0.683093	Compromised	-0.683093	Compromised	0	-0.394967	Compromised	-0.192852	Compromised	-0.293909	0.711804	4.97	1.9	2.03	2.14	A_33_P3296313	Unknown
A_33_P3296348	-0.048965	Compromised	0.048965	Compromised	0	0.34658	Compromised	0.434089	Compromised	0.390335	0.0271539	2.01	2.12	2.28	2.22	A_33_P3296348	Unknown
A_33_P3296696	-0.0392451	Compromised	0.0392446	Compromised	-2.4e-07	0.196266	Compromised	0.399492	Compromised	0.297879	0.111749	1.97	2.05	2	2.11	A_33_P3296696	Unknown
A_33_P3296721	-0.0766547	Detected	0.0766544	Detected	-1.18e-07	-0.550747	Compromised	-1.56525	Compromised	-1.058	0.175278	12.5	13.7	7.76	3.52	A_33_P3296721	Unknown
A_33_P3296769	0.167752	Detected	-0.167752	Compromised	0	0.568829	Detected	-1.19827	Compromised	-0.314722	0.759793	13.7	10.7	15.6	4.2	A_33_P3296769	Unknown
A_33_P3297150	-0.861403	Compromised	0.861403	Compromised	2.35e-07	-0.449757	Compromised	1.22371	Compromised	0.386979	0.777835	1.7	5.53	1.95	5.7	A_33_P3297150	Unknown
A_33_P3297280	-0.0477219	Compromised	0.0477214	Compromised	-2.385e-07	0.338452	Compromised	0.491277	Compromised	0.414865	0.0440628	1.89	1.99	2.13	2.17	A_33_P3297280	Unknown
A_33_P3297297	-0.0386844	Compromised	0.0386844	Compromised	0	0.23133	Compromised	0.418139	Compromised	0.324734	0.0847799	2.01	2.09	2.09	2.18	A_33_P3297297	Unknown
A_33_P3297310	0.189092	Compromised	-0.189092	Compromised	2.4e-07	1.01917	Detected	-0.2684	Compromised	0.375387	0.632142	8.48	6.43	13	4.88	A_33_P3297310	Unknown
A_33_P3297360	-0.0377545	Compromised	0.0377545	Compromised	0	0.340583	Compromised	0.51524	Compromised	0.427912	0.0460458	1.82	1.89	2.04	2.11	A_33_P3297360	Unknown
A_33_P3297655	-0.0597324	Compromised	0.0597324	Compromised	0	0.366635	Compromised	0.625454	Compromised	0.496045	0.0735657	1.7	1.82	1.97	2.16	A_33_P3297655	Unknown
A_33_P3297808	0.221344	Compromised	-0.221344	Compromised	2.4e-07	0.687509	Compromised	0.261916	Compromised	0.474713	0.262127	2.51	1.82	2.99	2.04	A_33_P3297808	Unknown
A_33_P3297818	-0.0633855	Compromised	0.0633855	Compromised	0	0.361825	Compromised	0.599919	Compromised	0.480872	0.0704513	1.71	1.84	1.98	2.14	A_33_P3297818	Unknown
A_33_P3297834	0.142873	Compromised	-0.142873	Compromised	0	0.0902247	Compromised	0.281206	Compromised	0.185715	0.392816	2.61	2.11	2.17	2.27	A_33_P3297834	Unknown
A_33_P3298251	0.138581	Detected	-0.138581	Detected	0	-0.56332	Detected	0.180048	Detected	-0.191636	0.676736	33.2	27	17.6	27	A_33_P3298251	Unknown
A_33_P3298267	0.224585	Detected	-0.224585	Compromised	0	0.474211	Detected	-0.0845146	Compromised	0.194848	0.641212	11.9	8.59	12.2	7.59	A_33_P3298267	Unknown
A_33_P3298398	-0.0508399	Compromised	0.0508399	Compromised	0	0.34928	Compromised	0.614091	Compromised	0.481685	0.0768391	1.74	1.84	1.98	2.18	A_33_P3298398	Unknown
A_33_P3298552	0.0945551	Detected	-0.0945551	Detected	0	0.296711	Detected	0.0276206	Detected	0.162166	0.428028	627	542	622	473	A_33_P3298552	Unknown
A_33_P3298612	-0.995471	Compromised	0.995471	Detected	0	0.407897	Detected	-1.31537	Compromised	-0.453737	0.763236	6.05	23.7	13.8	3.83	A_33_P3298612	Unknown
A_33_P3298955	-0.108969	Compromised	0.108969	Compromised	0	-0.847106	Compromised	-0.595592	Compromised	-0.721349	0.0493102	3.83	4.39	1.98	2.16	A_33_P3298955	Unknown
A_33_P3298980	-0.0412309	Detected	0.0412309	Detected	0	0.705182	Detected	0.966517	Detected	0.83585	0.0258352	25.3	26.4	36.6	40.2	A_33_P3298980	Unknown
A_33_P3299042	-0.177022	Detected	0.177022	Detected	0	-0.444587	Compromised	-0.489012	Compromised	-0.466799	0.120283	10.4	13.1	7.45	6.62	A_33_P3299042	Unknown
A_33_P3299047	-0.0449538	Detected	0.0449538	Detected	0	0.2646	Detected	0.298543	Detected	0.281572	0.0279089	75.7	79.4	80.9	75.9	A_33_P3299047	Unknown
A_33_P3299125	-0.062952	Compromised	0.062952	Compromised	0	0.36588	Compromised	0.441013	Compromised	0.403446	0.0314674	1.99	2.14	2.31	2.23	A_33_P3299125	Unknown
A_33_P3299130	0.233875	Detected	-0.233875	Detected	0	-0.0894468	Detected	-0.849293	Detected	-0.46937	0.403122	111	79.1	76.5	41.4	A_33_P3299130	Unknown
A_33_P3299376	-0.0284309	Compromised	0.0284314	Compromised	2.385e-07	0.163362	Compromised	0.375074	Compromised	0.269218	0.133384	1.99	2.04	1.96	2.08	A_33_P3299376	Unknown
A_33_P3299436	0.128452	Detected	-0.128452	Detected	0	-0.00316811	Detected	-0.0403204	Detected	-0.0217443	0.882357	101000	83300	79500	71000	A_33_P3299436	Unknown
A_33_P3299495	-0.034379	Compromised	0.034379	Compromised	0	-0.0788651	Compromised	-1.41292	Compromised	-0.745892	0.380264	7.14	7.38	5.97	2.17	A_33_P3299495	Unknown
A_33_P3299750	-0.0391431	Compromised	0.0391431	Compromised	0	0.324898	Compromised	0.531255	Compromised	0.428077	0.0604885	1.73	1.8	1.92	2.03	A_33_P3299750	Unknown
A_33_P3299972	-0.0505152	Compromised	0.0505147	Compromised	-2.385e-07	0.305445	Compromised	0.417817	Compromised	0.361631	0.0409867	1.93	2.04	2.13	2.11	A_33_P3299972	Unknown
A_33_P3300022	0.507281	Compromised	-0.507281	Compromised	0	-0.177132	Compromised	0.0942817	Compromised	-0.0414252	0.944305	3.69	1.8	1.98	2.19	A_33_P3300022	Unknown
A_33_P3300032	-0.661008	Compromised	0.661008	Compromised	0	-0.403357	Compromised	-0.19331	Compromised	-0.298334	0.699392	1.94	4.78	2	2.12	A_33_P3300032	Unknown
A_33_P3300117	-0.2584	Detected	0.2584	Detected	0	-0.287348	Detected	-0.639667	Detected	-0.463507	0.276515	23.9	33.7	20.2	14.5	A_33_P3300117	Unknown
A_33_P3300179	-0.00800395	Detected	0.00800395	Detected	0	0.240588	Detected	0.117258	Detected	0.178923	0.102538	57.2	57	58.6	49.3	A_33_P3300179	Unknown
A_33_P3300591	-0.0285206	Compromised	0.0285201	Compromised	-2.385e-07	0.330617	Compromised	0.449997	Compromised	0.390307	0.027546	1.98	2.03	2.19	2.18	A_33_P3300591	Unknown
A_33_P3300877	-0.0332134	Detected	0.0332134	Detected	0	-0.205451	Detected	-0.767524	Detected	-0.486488	0.227738	72	74.3	55.1	34.2	A_33_P3300877	Unknown
A_33_P3301095	0.168078	Detected	-0.168078	Detected	0	0.0176816	Detected	-1.10426	Detected	-0.543291	0.451486	269	210	209	88	A_33_P3301095	Unknown
A_33_P3301097	0.0556228	Detected	-0.0556228	Detected	0	-0.549223	Compromised	-2.54925	Compromised	-1.54924	0.261965	19.4	17.7	11	2.52	A_33_P3301097	Unknown
A_33_P3301124	0.936723	Compromised	-0.936722	Compromised	2.3e-07	0.10392	Compromised	-0.444064	Compromised	-0.170072	0.877705	7.25	1.95	3.51	2.2	A_33_P3301124	Unknown
A_33_P3301129	-0.844786	Compromised	0.844786	Compromised	0	-0.65473	Compromised	0.249357	Compromised	-0.202686	0.852061	2.46	7.82	2.42	4.15	A_33_P3301129	Unknown
A_33_P3301445	-0.0681074	Detected	0.0681074	Detected	0	-0.453098	Detected	-0.422561	Detected	-0.43783	0.0244845	686	743	453	424	A_33_P3301445	Unknown
A_33_P3301509	-0.0467062	Compromised	0.0467062	Compromised	0	0.374001	Compromised	0.61656	Compromised	0.495281	0.0624716	1.75	1.84	2.02	2.19	A_33_P3301509	Unknown
A_33_P3301876	0.00749207	Detected	-0.00749207	Detected	0	-0.353495	Detected	0.131333	Detected	-0.111081	0.691893	77	75.1	51.7	66.3	A_33_P3301876	Unknown
A_33_P3301980	0.331891	Compromised	-0.331891	Compromised	0	-0.0710735	Compromised	0.13408	Compromised	0.0315032	0.936006	2.99	1.86	1.95	2.06	A_33_P3301980	Unknown
A_33_P3302390	0.021421	Detected	-0.021421	Detected	0	0.101619	Detected	-0.086803	Detected	0.00740814	0.945861	57.7	55.2	52.6	42.3	A_33_P3302390	Unknown
A_33_P3303302	0.102787	Detected	-0.102787	Detected	0	-0.0754263	Detected	-0.401077	Detected	-0.238252	0.341531	45.4	38.8	34.6	25.3	A_33_P3303302	Unknown
A_33_P3303361	-0.254481	Compromised	0.254481	Compromised	1.2e-07	0.161048	Compromised	-1.44242	Compromised	-0.640686	0.525815	6.66	9.34	7.66	2.31	A_33_P3303361	Unknown
A_33_P3303394	0.0693264	Detected	-0.0693269	Detected	-2.4e-07	0.431754	Detected	0.291413	Detected	0.361584	0.0670256	7920	7090	8780	7300	A_33_P3303394	Unknown
A_33_P3303469	-0.0172143	Detected	0.0172143	Detected	0	-0.319177	Detected	-0.673692	Detected	-0.496435	0.108205	75.2	75.9	52.6	37.7	A_33_P3303469	Unknown
A_33_P3303557	0.57159	Detected	-0.57159	Compromised	0	-0.547216	Compromised	-1.07028	Compromised	-0.808747	0.327048	17.1	7.63	6.79	4.33	A_33_P3303557	Unknown
A_33_P3303562	0.0960708	Detected	-0.0960708	Detected	0	-0.329189	Detected	-0.983893	Detected	-0.656541	0.194185	31.3	27	20.1	11.7	A_33_P3303562	Unknown
A_33_P3303752	-0.792975	Compromised	0.792976	Compromised	2.5e-07	1.17479	Compromised	1.60531	Compromised	1.39005	0.23277	1.93	5.71	6.51	8.04	A_33_P3303752	Unknown
A_33_P3304092	0.40969	Compromised	-0.40969	Compromised	0	-1.40793	Compromised	-0.811679	Compromised	-1.1098	0.159893	8.38	4.68	2.05	2.84	A_33_P3304092	Unknown
A_33_P3304097	-0.117545	Detected	0.117545	Detected	0	-0.334714	Detected	-1.54006	Detected	-0.937386	0.266402	51.9	60.2	38.5	15.3	A_33_P3304097	Unknown
A_33_P3304182	-0.0524149	Compromised	0.0524149	Compromised	0	0.33817	Compromised	0.525264	Compromised	0.431717	0.0565145	1.84	1.95	2.08	2.17	A_33_P3304182	Unknown
A_33_P3304369	-0.0483806	Detected	0.0483806	Detected	0	-0.314283	Detected	-0.330553	Detected	-0.322418	0.022379	297	313	213	193	A_33_P3304369	Unknown
A_33_P3304402	-0.0526371	Compromised	0.0526371	Compromised	0	1.36988	Compromised	1.64172	Compromised	1.5058	0.00923956	1.83	1.94	4.23	4.68	A_33_P3304402	Unknown
A_33_P3304748	-0.0249579	Detected	0.0249579	Detected	0	0.159305	Detected	0.0252254	Detected	0.0922654	0.326142	29.7	30.3	29.1	24.3	A_33_P3304748	Unknown
A_33_P3304769	-0.166188	Compromised	0.166188	Compromised	0	0.191189	Compromised	0.310319	Compromised	0.250754	0.291356	1.91	2.37	2.11	2.1	A_33_P3304769	Unknown
A_33_P3304998	-0.0512953	Compromised	0.0512958	Compromised	2.385e-07	0.365503	Compromised	0.636917	Compromised	0.50121	0.0745376	1.72	1.82	1.98	2.19	A_33_P3304998	Unknown
A_33_P3305250	0.11691	Detected	-0.11691	Detected	0	-0.509226	Detected	-0.0823765	Detected	-0.295801	0.348168	24.7	20.7	13.8	17	A_33_P3305250	Unknown
A_33_P3305335	-0.0467873	Compromised	0.0467868	Compromised	-2.385e-07	1.47089	Compromised	0.434457	Compromised	0.952673	0.208591	1.94	2.04	4.79	2.14	A_33_P3305335	Unknown
A_33_P3305438	0.186549	Detected	-0.186549	Detected	0	-0.0910716	Detected	-0.223401	Detected	-0.157236	0.510259	34.3	26.1	24.4	20.4	A_33_P3305438	Unknown
A_33_P3305462	-0.163787	Compromised	0.163787	Compromised	-2.35e-07	0.0911427	Compromised	0.237304	Compromised	0.164223	0.45651	2.07	2.56	2.13	2.16	A_33_P3305462	Unknown
A_33_P3305526	-0.0391026	Compromised	0.0391026	Compromised	0	0.85813	Compromised	0.432782	Compromised	0.645456	0.0962977	1.98	2.06	3.18	2.17	A_33_P3305526	Unknown
A_33_P3305710	0.701249	Compromised	-0.701249	Compromised	2.25e-07	-0.474814	Compromised	0.195489	Compromised	-0.139663	0.87395	5.66	2.11	2.16	3.15	A_33_P3305710	Unknown
A_33_P3305820	1.71103	Detected	-1.71103	Compromised	-2.5e-07	-1.43881	Compromised	-1.20441	Compromised	-1.32161	0.521524	21.1	1.94	2.05	2.21	A_33_P3305820	Unknown
A_33_P3306063	-0.0512953	Compromised	0.0512958	Compromised	2.385e-07	0.358199	Compromised	0.576376	Compromised	0.467287	0.0605663	1.72	1.82	1.97	2.1	A_33_P3306063	Unknown
A_33_P3306327	0.0454156	Detected	-0.0454156	Detected	0	-0.0654995	Detected	0.126372	Detected	0.0304363	0.801282	1340	1240	1070	1120	A_33_P3306327	Unknown
A_33_P3306339	0.0067687	Compromised	-0.0067687	Compromised	0	0.260928	Compromised	0.477109	Compromised	0.369018	0.0763953	2.11	2.06	2.17	2.31	A_33_P3306339	Unknown
A_33_P3306363	-0.0850072	Compromised	0.0850074	Detected	1.2e-07	0.0775294	Compromised	-1.64385	Compromised	-0.783162	0.460769	9.47	10.5	9.14	2.54	A_33_P3306363	Unknown
A_33_P3306526	0.0627661	Detected	-0.0627651	Detected	4.775e-07	0.347858	Detected	0.114112	Detected	0.230985	0.22378	41400	37400	43500	33900	A_33_P3306526	Unknown
A_33_P3307063	0.393681	Compromised	-0.393681	Compromised	0	-0.156867	Compromised	3.25433	Detected	1.54873	0.469621	3.38	1.93	1.99	19.4	A_33_P3307063	Unknown
A_33_P3307088	-0.294146	Compromised	0.294145	Compromised	-2.4e-07	0.0563779	Compromised	0.544931	Compromised	0.300655	0.514047	1.91	2.83	2.1	2.7	A_33_P3307088	Unknown
A_33_P3307192	-0.222567	Compromised	0.222566	Compromised	-2.35e-07	-0.0234323	Compromised	0.187858	Compromised	0.0822129	0.770344	1.99	2.67	1.97	2.09	A_33_P3307192	Unknown
A_33_P3307402	-0.0582404	Detected	0.0582404	Detected	0	0.185968	Detected	-3.16938	Compromised	-1.4917	0.467965	23.4	25	23.9	2.14	A_33_P3307402	Unknown
A_33_P3307408	0.458922	Compromised	-0.458922	Compromised	0	-0.177572	Compromised	-0.0582223	Compromised	-0.117897	0.822714	3.93	2.05	2.18	2.17	A_33_P3307408	Unknown
A_33_P3308147	-0.202787	Compromised	0.202787	Compromised	-2.4e-07	0.0320845	Compromised	2.06215	Compromised	1.04712	0.418204	2.03	2.65	2.06	7.71	A_33_P3308147	Unknown
A_33_P3308153	-0.125044	Detected	0.125044	Detected	0	0.200556	Detected	-0.0577257	Detected	0.0714152	0.729547	186	218	201	154	A_33_P3308153	Unknown
A_33_P3309643	-0.00103903	Detected	0.00103903	Detected	0	0.154953	Detected	0.241135	Detected	0.198044	0.0442495	153	151	147	143	A_33_P3309643	Unknown
A_33_P3309656	-0.0545044	Compromised	0.0545049	Compromised	2.375e-07	0.322701	Compromised	0.561895	Compromised	0.442298	0.0780972	1.75	1.86	1.96	2.12	A_33_P3309656	Unknown
A_33_P3309849	-0.0902085	Detected	0.0902085	Detected	0	-0.371649	Detected	-0.14811	Detected	-0.25988	0.212114	137	153	97.2	104	A_33_P3309849	Unknown
A_33_P3310198	-0.0517616	Compromised	0.0517616	Compromised	0	0.381911	Compromised	0.653325	Compromised	0.517618	0.0705101	1.7	1.8	1.98	2.19	A_33_P3310198	Unknown
A_33_P3310296	0.0311773	Detected	-0.0311773	Detected	0	0.416609	Detected	0.0499523	Detected	0.233281	0.336409	35.6	33.6	40.1	28.5	A_33_P3310296	Unknown
A_33_P3310327	-0.0479145	Compromised	0.0479145	Compromised	0	0.269415	Compromised	0.498738	Compromised	0.384076	0.0906748	1.88	1.98	2.02	2.17	A_33_P3310327	Unknown
A_33_P3310401	0.555091	Compromised	-0.555092	Compromised	-2.3e-07	-0.309978	Compromised	-0.0844598	Compromised	-0.197219	0.760938	4.14	1.89	1.96	2.1	A_33_P3310401	Unknown
A_33_P3310409	-0.0105305	Compromised	0.0105309	Compromised	2.385e-07	0.273224	Compromised	0.491889	Compromised	0.382556	0.0734673	2.01	2.01	2.11	2.25	A_33_P3310409	Unknown
A_33_P3310512	0.128978	Detected	-0.128978	Detected	0	-0.31114	Detected	-0.0259581	Detected	-0.168549	0.47314	47.2	38.9	30	33.5	A_33_P3310512	Unknown
A_33_P3310751	0.0919218	Detected	-0.0919218	Detected	0	-0.0844913	Detected	-0.894091	Detected	-0.489291	0.35975	57.4	49.8	43.8	22.9	A_33_P3310751	Unknown
A_33_P3310754	0.602471	Detected	-0.602471	Compromised	-1.25e-07	-0.602069	Compromised	0.0730925	Compromised	-0.264488	0.738607	12	5.13	4.49	6.57	A_33_P3310754	Unknown
A_33_P3311001	-0.751357	Compromised	0.751357	Compromised	0	-0.0964599	Compromised	-0.585997	Compromised	-0.341228	0.707971	2.46	6.87	3.34	2.18	A_33_P3311001	Unknown
A_33_P3311308	0.180324	Compromised	-0.180324	Compromised	0	0.086669	Compromised	0.199416	Compromised	0.143043	0.528019	2.71	2.08	2.19	2.17	A_33_P3311308	Unknown
A_33_P3311458	0.114149	Detected	-0.114149	Detected	0	-0.55984	Detected	-0.329669	Detected	-0.444755	0.111123	1260	1060	681	732	A_33_P3311458	Unknown
A_33_P3311646	0.0715294	Detected	-0.0715289	Detected	2.4e-07	-0.0974188	Detected	0.287098	Detected	0.0948396	0.689267	2790	2490	2140	2560	A_33_P3311646	Unknown
A_33_P3311648	-0.0499587	Compromised	0.0499582	Compromised	-2.38e-07	0.339066	Compromised	0.588785	Compromised	0.463926	0.0747328	1.78	1.88	2.01	2.19	A_33_P3311648	Unknown
A_33_P3311711	0.0136895	Compromised	-0.013689	Compromised	2.385e-07	0.267661	Compromised	0.495824	Compromised	0.381742	0.0798888	2.12	2.05	2.18	2.34	A_33_P3311711	Unknown
A_33_P3311855	-0.0521946	Compromised	0.0521951	Compromised	2.385e-07	0.323617	Compromised	3.12244	Detected	1.72303	0.343625	1.85	1.96	2.07	13.2	A_33_P3311855	Unknown
A_33_P3311911	0.110254	Compromised	-0.110254	Compromised	-2.4e-07	-0.842878	Compromised	0.893278	Compromised	0.0251999	0.979641	4.67	3.95	2.08	6.35	A_33_P3311911	Unknown
A_33_P3311920	-0.348612	Compromised	0.348612	Compromised	0	0.0375624	Compromised	0.478684	Compromised	0.258123	0.595387	1.89	3.02	2.13	2.65	A_33_P3311920	Unknown
A_33_P3311966	0.507184	Compromised	-0.507185	Compromised	-2.5e-07	-0.185028	Compromised	1.36145	Compromised	0.58821	0.589802	3.71	1.81	1.98	5.3	A_33_P3311966	Unknown
A_33_P3312044	-0.0772724	Compromised	0.0772719	Compromised	-2.375e-07	1.8414	Compromised	1.84983	Compromised	1.84561	0.00175353	1.96	2.15	6.39	5.89	A_33_P3312044	Unknown
A_33_P3312147	0.842534	Detected	-0.842534	Compromised	0	-0.0233955	Compromised	-0.680273	Compromised	-0.351834	0.734739	10.8	3.31	5.11	2.97	A_33_P3312147	Unknown
A_33_P3312187	-0.532842	Compromised	0.532842	Compromised	0	-0.148371	Compromised	0.0495982	Compromised	-0.0493865	0.935697	1.91	3.94	2.15	2.26	A_33_P3312187	Unknown
A_33_P3312251	-0.244093	Compromised	0.244094	Compromised	2.4e-07	-0.665722	Compromised	1.2476	Compromised	0.290939	0.796013	3.06	4.23	1.97	6.8	A_33_P3312251	Unknown
A_33_P3312342	-0.0217147	Compromised	0.0217147	Compromised	0	2.72337	Detected	1.69302	Compromised	2.20819	0.0504375	1.92	1.95	11.1	4.98	A_33_P3312342	Unknown
A_33_P3312436	-0.0388222	Compromised	0.0388227	Compromised	2.38e-07	0.345726	Compromised	0.543144	Compromised	0.444435	0.0525128	1.75	1.82	1.97	2.07	A_33_P3312436	Unknown
A_33_P3312774	0.130176	Compromised	-0.130176	Compromised	0	0.120475	Compromised	0.35591	Compromised	0.238193	0.307597	2.37	1.95	2.03	2.19	A_33_P3312774	Unknown
A_33_P3312784	0.261514	Detected	-0.261514	Detected	0	-0.475869	Detected	-0.178774	Detected	-0.327321	0.390127	26.1	17.9	13.5	15.2	A_33_P3312784	Unknown
A_33_P3312886	0.383317	Compromised	-0.383318	Compromised	-2.4e-07	0.316288	Compromised	0.100165	Compromised	0.208227	0.653233	3.28	1.9	2.7	2.13	A_33_P3312886	Unknown
A_33_P3313075	0.487463	Compromised	-0.487463	Compromised	2.4e-07	0.717156	Compromised	0.1141	Compromised	0.415628	0.543741	3.59	1.8	3.63	2.19	A_33_P3313075	Unknown
A_33_P3313095	0.950468	Compromised	-0.950468	Compromised	0	-0.482188	Compromised	0.232934	Compromised	-0.124627	0.913545	7.2	1.9	2.3	3.46	A_33_P3313095	Unknown
A_33_P3313323	0.0853643	Compromised	-0.0853648	Compromised	-2.4e-07	0.890007	Compromised	0.313065	Compromised	0.601536	0.183566	2.41	2.11	3.63	2.23	A_33_P3313323	Unknown
A_33_P3313552	-0.165565	Compromised	0.165565	Compromised	0	1.19634	Compromised	1.32233	Compromised	1.25934	0.0192177	1.71	2.12	3.79	3.79	A_33_P3313552	Unknown
A_33_P3313625	-0.0858703	Detected	0.0858703	Detected	0	-0.832993	Compromised	-1.11519	Compromised	-0.974093	0.02757	10.9	12.1	5.6	4.22	A_33_P3313625	Unknown
A_33_P3313640	-0.442855	Compromised	0.442855	Compromised	0	1.50566	Compromised	0.0401993	Compromised	0.772931	0.461924	2.01	3.66	6.69	2.22	A_33_P3313640	Unknown
A_33_P3313652	0.24785	Detected	-0.24785	Detected	0	0.11259	Detected	-0.704094	Detected	-0.295752	0.598946	75.4	52.7	59.2	30.8	A_33_P3313652	Unknown
A_33_P3313695	-0.366106	Compromised	0.366107	Detected	2.35e-07	-1.76607	Compromised	-1.50193	Compromised	-1.634	0.0523212	6.09	9.97	1.99	2.19	A_33_P3313695	Unknown
A_33_P3314121	-0.021657	Compromised	0.0216575	Compromised	2.385e-07	0.327513	Compromised	0.473769	Compromised	0.400641	0.0343804	1.93	1.96	2.12	2.15	A_33_P3314121	Unknown
A_33_P3314352	-0.0808296	Compromised	0.0808301	Compromised	2.4e-07	-1.53388	Compromised	-0.106308	Compromised	-0.820094	0.371866	6.35	7	2	4.93	A_33_P3314352	Unknown
A_33_P3314574	0.311701	Compromised	-0.311701	Compromised	-2.4e-07	0.382551	Compromised	1.01261	Compromised	0.697581	0.256132	5.94	3.8	5.38	7.63	A_33_P3314574	Unknown
A_33_P3314828	-0.0355926	Compromised	0.0355926	Compromised	0	0.206969	Compromised	0.409451	Compromised	0.30821	0.102867	1.98	2.05	2.02	2.13	A_33_P3314828	Unknown
A_33_P3315074	-0.0619104	Detected	0.0619104	Detected	0	-0.394947	Detected	-0.959536	Detected	-0.677242	0.143831	149	160	102	63.2	A_33_P3315074	Unknown
A_33_P3315154	2.3982	Detected	-2.3982	Compromised	0	-1.38586	Compromised	-1.84038	Compromised	-1.61312	0.572045	51.6	1.83	3.23	2.16	A_33_P3315154	Unknown
A_33_P3315624	-0.0475311	Compromised	0.0475307	Compromised	-2.39e-07	0.37768	Compromised	0.635858	Compromised	0.506769	0.0664262	1.71	1.8	1.98	2.17	A_33_P3315624	Unknown
A_33_P3315634	0.03142	Detected	-0.03142	Detected	0	0.139465	Detected	-0.0796874	Detected	0.0298889	0.817702	35.4	33.4	32.9	25.9	A_33_P3315634	Unknown
A_33_P3315659	-0.0276661	Compromised	0.0276656	Compromised	-2.385e-07	0.227068	Compromised	0.406	Compromised	0.316534	0.0774888	2.08	2.13	2.14	2.22	A_33_P3315659	Unknown
A_33_P3315704	-0.36709	Compromised	0.36709	Detected	-1.15e-07	-0.0411844	Compromised	-0.298974	Compromised	-0.170079	0.704674	9.15	15	9.89	7.58	A_33_P3315704	Unknown
A_33_P3315724	-0.0552483	Compromised	0.0552483	Compromised	0	1.08534	Compromised	0.613065	Compromised	0.849203	0.072766	1.72	1.83	3.27	2.16	A_33_P3315724	Unknown
A_33_P3315763	0.0574865	Detected	-0.0574875	Detected	-4.77e-07	0.0261707	Detected	-0.0770273	Detected	-0.0254283	0.7733	58900	53600	49700	42400	A_33_P3315763	Unknown
A_33_P3315824	0.00325346	Detected	-0.00325346	Detected	0	-0.233397	Detected	-0.679993	Detected	-0.456695	0.177514	31.7	31.1	23.2	15.6	A_33_P3315824	Unknown
A_33_P3315836	-0.111348	Detected	0.111348	Detected	0	-0.879719	Detected	-1.22322	Detected	-1.05147	0.0358689	32	36.8	16.2	11.7	A_33_P3315836	Unknown
A_33_P3315899	0.00329757	Detected	-0.00329757	Detected	0	0.444606	Detected	-0.316937	Detected	0.0638344	0.882286	1580	1550	1850	1000	A_33_P3315899	Unknown
A_33_P3315915	-0.447765	Detected	0.447765	Detected	0	-0.178563	Detected	-0.823979	Compromised	-0.501271	0.459635	10.2	18.7	10.6	6.21	A_33_P3315915	Unknown
A_33_P3315986	-0.280166	Detected	0.280166	Detected	1.25e-07	0.451225	Detected	0.471964	Detected	0.461595	0.241421	13.9	20.2	19.9	18.5	A_33_P3315986	Unknown
A_33_P3316093	-0.0660467	Compromised	0.0660462	Compromised	-2.375e-07	0.343008	Compromised	0.404574	Compromised	0.373791	0.0359651	2	2.16	2.29	2.19	A_33_P3316093	Unknown
A_33_P3316178	-0.512649	Compromised	0.51265	Compromised	2.4e-07	-0.0717087	Compromised	0.185834	Compromised	0.0570629	0.923885	1.7	3.41	1.99	2.18	A_33_P3316178	Unknown
A_33_P3316248	0.111679	Detected	-0.111679	Detected	0	-0.435192	Compromised	-0.0739505	Compromised	-0.254571	0.353385	15.4	13	9.09	10.7	A_33_P3316248	Unknown
A_33_P3316261	-0.0493221	Compromised	0.0493226	Compromised	2.375e-07	0.35104	Compromised	0.552073	Compromised	0.451557	0.0563364	1.81	1.91	2.06	2.17	A_33_P3316261	Unknown
A_33_P3316379	0.0326548	Detected	-0.0326543	Detected	2.385e-07	0.284285	Detected	0.318972	Detected	0.301628	0.0146962	4130	3890	4240	3980	A_33_P3316379	Unknown
A_33_P3316572	-0.0508399	Compromised	0.0508399	Compromised	0	0.378135	Compromised	0.614091	Compromised	0.496113	0.0609833	1.74	1.84	2.02	2.18	A_33_P3316572	Unknown
A_33_P3316671	0.0108442	Detected	-0.0108442	Detected	0	-0.32813	Detected	-0.281523	Detected	-0.304826	0.00703502	137	133	93.4	88.4	A_33_P3316671	Unknown
A_33_P3316691	-0.100764	Detected	0.100764	Detected	0	-0.124802	Detected	-0.293986	Detected	-0.209394	0.25247	80.3	91	68.1	55.5	A_33_P3316691	Unknown
A_33_P3316696	0.0616643	Detected	-0.0616643	Detected	0	-0.273671	Detected	-1.23294	Detected	-0.753304	0.259602	35.7	32.3	24.4	11.5	A_33_P3316696	Unknown
A_33_P3317460	0.0083909	Detected	-0.0083909	Detected	0	-0.0692258	Detected	-0.0873318	Detected	-0.0782788	0.0239747	61.8	60.2	50.5	45.7	A_33_P3317460	Unknown
A_33_P3317548	-0.626467	Compromised	0.626467	Compromised	0	-0.238731	Compromised	1.2708	Compromised	0.516034	0.651341	1.95	4.58	2.2	5.74	A_33_P3317548	Unknown
A_33_P3317761	-0.151477	Detected	0.151477	Detected	0	-0.0897737	Detected	-1.24414	Compromised	-0.666957	0.379945	19	23.1	17.1	7.04	A_33_P3317761	Unknown
A_33_P3318069	0.209755	Compromised	-0.209755	Compromised	0	-0.488862	Compromised	-0.362879	Compromised	-0.42587	0.191266	3.99	2.94	2.12	2.12	A_33_P3318069	Unknown
A_33_P3318227	-0.0491147	Compromised	0.0491147	Compromised	0	0.322134	Compromised	0.557568	Compromised	0.439851	0.0747832	1.82	1.92	2.03	2.19	A_33_P3318227	Unknown
A_33_P3318377	-0.132898	Detected	0.132898	Detected	0	0.174677	Detected	0.119329	Detected	0.147003	0.392036	119	141	127	112	A_33_P3318377	Unknown
A_33_P3318384	-0.245602	Detected	0.245602	Detected	-1.2e-07	-0.0437689	Detected	-0.242698	Compromised	-0.143233	0.642967	12.2	16.9	12.1	9.66	A_33_P3318384	Unknown
A_33_P3318736	0.440737	Compromised	-0.440736	Compromised	2.35e-07	-0.248091	Compromised	-0.0376329	Compromised	-0.142862	0.782404	3.72	1.99	1.99	2.11	A_33_P3318736	Unknown
A_33_P3318766	0.206296	Detected	-0.206296	Detected	0	-0.0906119	Detected	0.107642	Detected	0.00851488	0.973703	41.6	30.8	29.2	30.7	A_33_P3318766	Unknown
A_33_P3318781	-0.0512953	Compromised	0.0512958	Compromised	2.385e-07	0.350857	Compromised	0.569489	Compromised	0.460173	0.0624744	1.72	1.82	1.96	2.09	A_33_P3318781	Unknown
A_33_P3319502	-0.0870066	Detected	0.0870066	Detected	0	-0.22641	Detected	-0.606366	Detected	-0.416388	0.184497	152	169	119	83.8	A_33_P3319502	Unknown
A_33_P3319937	0.0680017	Detected	-0.0680013	Detected	2.4e-07	0.0586271	Detected	0.105267	Detected	0.0819469	0.372444	34900	31300	29900	28300	A_33_P3319937	Unknown
A_33_P3319953	0.790755	Compromised	-0.790755	Compromised	0	0.79493	Compromised	-0.234627	Compromised	0.280152	0.794531	5.77	1.9	4.99	2.24	A_33_P3319953	Unknown
A_33_P3320241	-0.495344	Compromised	0.495344	Compromised	2.3e-07	-0.259269	Compromised	-0.0471292	Compromised	-0.153199	0.790883	1.92	3.76	1.95	2.07	A_33_P3320241	Unknown
A_33_P3320283	-0.0597324	Compromised	0.0597324	Compromised	0	0.69878	Compromised	0.598487	Compromised	0.648633	0.0141513	1.7	1.82	2.48	2.12	A_33_P3320283	Unknown
A_33_P3320408	0.125852	Compromised	-0.125853	Compromised	-2.35e-07	0.066793	Compromised	0.298645	Compromised	0.182719	0.397402	2.38	1.97	1.97	2.12	A_33_P3320408	Unknown
A_33_P3320415	0.0760016	Compromised	-0.0760021	Compromised	-2.38e-07	-0.697801	Compromised	-0.668247	Compromised	-0.683024	0.0126072	4.6	4.08	2.32	2.17	A_33_P3320415	Unknown
A_33_P3320418	-0.0772724	Compromised	0.0772719	Compromised	-2.375e-07	0.360929	Compromised	0.415892	Compromised	0.38841	0.041809	1.96	2.15	2.29	2.18	A_33_P3320418	Unknown
A_33_P3320698	-0.451341	Compromised	0.451341	Compromised	0	0.613452	Compromised	0.573363	Compromised	0.593408	0.319473	3.11	5.73	5.61	5	A_33_P3320698	Unknown
A_33_P3320708	-0.0407486	Compromised	0.0407491	Compromised	2.385e-07	0.34031	Compromised	0.493515	Compromised	0.416912	0.0406875	1.87	1.95	2.1	2.14	A_33_P3320708	Unknown
A_33_P3321120	-0.743092	Compromised	0.743092	Compromised	-2.3e-07	0.811239	Compromised	0.588736	Compromised	0.699988	0.449886	1.84	5.08	4.66	3.66	A_33_P3321120	Unknown
A_33_P3321382	0.214977	Compromised	-0.214978	Compromised	-2.4e-07	0.22278	Compromised	0.911699	Compromised	0.56724	0.297234	4.06	2.97	3.52	5.2	A_33_P3321382	Unknown
A_33_P3321564	-0.832184	Compromised	0.832184	Compromised	-2.3e-07	-0.45008	Compromised	-0.485641	Compromised	-0.46786	0.630653	2.1	6.56	2.36	2.11	A_33_P3321564	Unknown
A_33_P3321682	0.119291	Detected	-0.119292	Detected	-2.37e-07	0.431401	Detected	0.380507	Detected	0.405954	0.0796435	17000	14200	18200	16100	A_33_P3321682	Unknown
A_33_P3321689	0.11942	Detected	-0.11942	Detected	0	0.0700927	Detected	-0.223149	Detected	-0.0765283	0.724879	55.2	46.1	46	34.4	A_33_P3321689	Unknown
A_33_P3321934	-0.0174007	Compromised	0.0174007	Compromised	0	0.243835	Compromised	0.43511	Compromised	0.339472	0.0731164	2.09	2.11	2.16	2.26	A_33_P3321934	Unknown
A_33_P3322103	-0.139767	Compromised	0.139767	Compromised	1.15e-07	0.218702	Compromised	-0.767265	Compromised	-0.274281	0.646012	7.39	8.84	8.17	3.78	A_33_P3322103	Unknown
A_33_P3322211	0.206644	Compromised	-0.206644	Compromised	0	-1.41304	Compromised	-0.764721	Compromised	-1.08888	0.105315	7.27	5.38	2.04	2.93	A_33_P3322211	Unknown
A_33_P3322430	0.127804	Detected	-0.127804	Detected	0	-0.0336125	Detected	-0.655443	Detected	-0.344527	0.413185	808	667	623	371	A_33_P3322430	Unknown
A_33_P3322460	0.132424	Detected	-0.132424	Detected	0	-0.20479	Detected	-1.03784	Detected	-0.621313	0.291066	35.6	29.2	24.3	12.5	A_33_P3322460	Unknown
A_33_P3322504	0.017761	Detected	-0.017761	Detected	0	-0.253959	Detected	-0.921524	Detected	-0.587742	0.22076	36.4	35	26	15	A_33_P3322504	Unknown
A_33_P3322730	0.182894	Detected	-0.182894	Detected	0	0.332267	Detected	-3.32487	Compromised	-1.4963	0.501043	64.2	49.1	61.4	4.46	A_33_P3322730	Unknown
A_33_P3322884	-0.0519772	Compromised	0.0519772	Compromised	0	0.32301	Compromised	0.496747	Compromised	0.409879	0.0559298	1.86	1.97	2.08	2.15	A_33_P3322884	Unknown
A_33_P3323544	-0.0346355	Compromised	0.0346351	Compromised	-2.385e-07	0.206816	Compromised	0.386738	Compromised	0.296777	0.0912886	2.06	2.13	2.1	2.18	A_33_P3323544	Unknown
A_33_P3323641	-0.263065	Compromised	0.263066	Compromised	2.35e-07	0.109188	Compromised	0.195461	Compromised	0.152324	0.62538	1.98	2.81	2.21	2.15	A_33_P3323641	Unknown
A_33_P3323687	-0.0549979	Compromised	0.0549974	Compromised	-2.38e-07	0.360705	Compromised	0.624851	Compromised	0.492778	0.0749375	1.73	1.84	1.99	2.19	A_33_P3323687	Unknown
A_33_P3323892	-0.0477219	Compromised	0.0477214	Compromised	-2.385e-07	1.05907	Compromised	0.484613	Compromised	0.771842	0.117705	1.89	1.99	3.51	2.16	A_33_P3323892	Unknown
A_33_P3323914	0.369836	Detected	-0.369836	Compromised	0	-1.69656	Compromised	-0.176302	Compromised	-0.936434	0.383346	10.2	6.02	2.1	5.52	A_33_P3323914	Unknown
A_33_P3323975	-0.0457253	Compromised	0.0457253	Compromised	0	0.33434	Compromised	0.576899	Compromised	0.45562	0.0722642	1.8	1.89	2.02	2.19	A_33_P3323975	Unknown
A_33_P3323989	-0.399334	Compromised	0.399335	Compromised	2.35e-07	-0.144985	Compromised	0.0462894	Compromised	-0.0493479	0.915327	2.1	3.6	2.16	2.26	A_33_P3323989	Unknown
A_33_P3324149	-0.26342	Detected	0.26342	Detected	0	-0.527191	Detected	-1.58563	Compromised	-1.05641	0.215844	18.1	25.7	13	5.72	A_33_P3324149	Unknown
A_33_P3324284	-0.0479145	Compromised	0.0479145	Compromised	0	0.325449	Compromised	0.48538	Compromised	0.405414	0.049018	1.88	1.98	2.1	2.15	A_33_P3324284	Unknown
A_33_P3324552	0.0326648	Detected	-0.0326648	Detected	0	0.0287361	Detected	-0.460475	Detected	-0.215869	0.473954	75.7	71.3	65.1	42.5	A_33_P3324552	Unknown
A_33_P3324675	0.172533	Detected	-0.172533	Detected	0	0.43515	Detected	-0.162536	Compromised	0.136307	0.730982	17.4	13.5	18	10.9	A_33_P3324675	Unknown
A_33_P3324680	-0.269184	Compromised	0.269184	Compromised	0	-0.13272	Compromised	0.110959	Compromised	-0.0108805	0.97397	2.11	3.02	2	2.17	A_33_P3324680	Unknown
A_33_P3324781	0.232183	Detected	-0.232183	Detected	-1.2e-07	-0.263854	Detected	0.120662	Detected	-0.0715964	0.834377	17.5	12.5	10.7	12.8	A_33_P3324781	Unknown
A_33_P3324899	0.492968	Detected	-0.492968	Compromised	1.2e-07	0.796873	Detected	0.77328	Detected	0.785077	0.252362	12.4	6.17	13.2	11.9	A_33_P3324899	Unknown
A_33_P3324904	-0.023242	Detected	0.023242	Detected	0	-2.32686	Compromised	-1.41625	Compromised	-1.87155	0.0545295	22.5	22.9	3.93	6.77	A_33_P3324904	Unknown
A_33_P3324974	-0.051527	Compromised	0.0515275	Compromised	2.385e-07	0.416753	Compromised	0.638495	Compromised	0.527624	0.0497225	1.71	1.81	2.04	2.18	A_33_P3324974	Unknown
A_33_P3325250	0.181475	Compromised	-0.181474	Compromised	2.4e-07	-0.380187	Compromised	0.957605	Compromised	0.288709	0.717449	3.68	2.82	2.15	4.98	A_33_P3325250	Unknown
A_33_P3325330	0.251093	Compromised	-0.251092	Compromised	2.35e-07	0.0122876	Compromised	0.158832	Compromised	0.0855598	0.77465	2.86	1.99	2.09	2.12	A_33_P3325330	Unknown
A_33_P3325826	-0.0597324	Compromised	0.0597324	Compromised	0	0.359293	Compromised	0.612034	Compromised	0.485664	0.0737814	1.7	1.82	1.96	2.14	A_33_P3325826	Unknown
A_33_P3325948	-0.0449781	Compromised	0.0449781	Compromised	0	0.296218	Compromised	0.539334	Compromised	0.417776	0.0842637	1.84	1.93	2.01	2.18	A_33_P3325948	Unknown
A_33_P3326151	-0.120484	Detected	0.120484	Detected	0	0.0280387	Detected	-0.418868	Detected	-0.195415	0.52193	24.9	29	23.8	16	A_33_P3326151	Unknown
A_33_P3326312	0.083879	Detected	-0.083879	Detected	0	-0.159167	Detected	-0.508342	Detected	-0.333754	0.227008	269	236	196	141	A_33_P3326312	Unknown
A_33_P3326439	-0.0510669	Compromised	0.0510664	Compromised	-2.375e-07	0.357368	Compromised	0.622179	Compromised	0.489774	0.0746728	1.73	1.83	1.98	2.18	A_33_P3326439	Unknown
A_33_P3326802	-0.0202131	Compromised	0.0202131	Compromised	0	-1.09539	Compromised	-0.935781	Compromised	-1.01559	0.00650721	5.18	5.25	2.12	2.17	A_33_P3326802	Unknown
A_33_P3326817	-0.00297713	Detected	0.00297713	Detected	0	-0.145414	Detected	-0.129308	Detected	-0.137361	0.00388391	1920	1900	1500	1390	A_33_P3326817	Unknown
A_33_P3326827	-0.227902	Compromised	0.227902	Compromised	0	-0.0809045	Compromised	0.307619	Compromised	0.113357	0.741436	5.09	6.88	4.86	5.83	A_33_P3326827	Unknown
A_33_P3326872	-0.224137	Compromised	0.224137	Detected	0	-1.05513	Compromised	-1.89919	Compromised	-1.47716	0.0906465	8.85	11.9	4.29	2.19	A_33_P3326872	Unknown
A_33_P3326898	-0.100472	Detected	0.100472	Detected	0	-0.12884	Detected	-0.587819	Detected	-0.358329	0.288895	36.9	41.8	31.2	20.8	A_33_P3326898	Unknown
A_33_P3326942	0.176456	Compromised	-0.176457	Compromised	-2.4e-07	0.0308352	Compromised	0.248561	Compromised	0.139698	0.569888	2.54	1.96	1.98	2.11	A_33_P3326942	Unknown
A_33_P3327140	0.0697019	Detected	-0.0697019	Detected	0	-0.207852	Detected	0.0392091	Detected	-0.0843213	0.61248	1140	1020	811	882	A_33_P3327140	Unknown
A_33_P3327250	-0.0294952	Detected	0.0294952	Detected	0	-0.287094	Detected	-0.54908	Detected	-0.418087	0.089511	48.8	50.1	35.2	26.9	A_33_P3327250	Unknown
A_33_P3327491	-0.199268	Detected	0.199268	Detected	0	0.299035	Detected	-0.30949	Detected	-0.0052278	0.989837	32.1	41.7	39.1	23.5	A_33_P3327491	Unknown
A_33_P3327723	0.935395	Compromised	-0.935395	Compromised	2.4e-07	0.620266	Compromised	0.495008	Compromised	0.557637	0.612297	6.68	1.8	4.63	3.89	A_33_P3327723	Unknown
A_33_P3327762	-0.083509	Detected	0.083509	Detected	0	0.0570631	Detected	-0.00795078	Detected	0.0245562	0.809773	26.3	29.1	25	21.9	A_33_P3327762	Unknown
A_33_P3327971	0.20331	Detected	-0.20331	Detected	0	-0.333863	Detected	-0.457	Detected	-0.395431	0.203732	38.2	28.4	22.7	19.1	A_33_P3327971	Unknown
A_33_P3328274	-0.437256	Compromised	0.437256	Compromised	0	-0.0319295	Compromised	0.184469	Compromised	0.0762699	0.881121	1.76	3.18	2.01	2.14	A_33_P3328274	Unknown
A_33_P3328284	0.00317884	Detected	-0.00317884	Detected	0	0.00748277	Detected	-0.0101464	Detected	-0.00133181	0.900002	90.3	88.6	78.1	70.7	A_33_P3328284	Unknown
A_33_P3328289	-0.438211	Detected	0.438211	Detected	1.15e-07	-0.990228	Compromised	-0.71418	Compromised	-0.852204	0.204766	15.2	27.5	8.94	9.92	A_33_P3328289	Unknown
A_33_P3328543	-0.0507174	Compromised	0.0507174	Compromised	0	0.305947	Compromised	0.43872	Compromised	0.372334	0.0468361	1.92	2.03	2.12	2.13	A_33_P3328543	Unknown
A_33_P3328564	-0.0597324	Compromised	0.0597324	Compromised	0	0.366635	Compromised	0.625454	Compromised	0.496045	0.0735657	1.7	1.82	1.97	2.16	A_33_P3328564	Unknown
A_33_P3328569	-0.0668597	Compromised	0.0668597	Compromised	0	0.325695	Compromised	1.18216	Compromised	0.753927	0.224079	1.97	2.13	2.23	3.7	A_33_P3328569	Unknown
A_33_P3328619	-0.10527	Detected	0.10527	Detected	-2.38e-07	0.268013	Detected	0.0453863	Detected	0.1567	0.413975	17100	19500	19100	15000	A_33_P3328619	Unknown
A_33_P3328751	-0.372654	Compromised	0.372654	Compromised	0	-0.336808	Compromised	1.54596	Compromised	0.604574	0.611016	3.19	5.27	2.82	9.53	A_33_P3328751	Unknown
A_33_P3328958	-0.0299754	Compromised	0.0299749	Compromised	-2.385e-07	0.340457	Compromised	0.50826	Compromised	0.424359	0.0413645	1.83	1.88	2.04	2.1	A_33_P3328958	Unknown
A_33_P3329038	0.718464	Compromised	-0.718464	Compromised	-2.5e-07	-0.396989	Compromised	-0.139446	Compromised	-0.268217	0.748514	5	1.82	1.99	2.18	A_33_P3329038	Unknown
A_33_P3329104	0.108775	Detected	-0.108775	Detected	-1.2e-07	0.365809	Detected	0.199437	Detected	0.282623	0.175081	16.4	13.9	16.9	13.8	A_33_P3329104	Unknown
A_33_P3329123	-0.326543	Compromised	0.326543	Compromised	0	0.0376554	Compromised	0.59559	Compromised	0.316622	0.537743	1.91	2.96	2.12	2.86	A_33_P3329123	Unknown
A_33_P3329133	0.101656	Compromised	-0.101655	Compromised	2.4e-07	-0.944114	Compromised	-0.748756	Compromised	-0.846435	0.0266374	4.86	4.16	2.03	2.13	A_33_P3329133	Unknown
A_33_P3329740	-0.02091	Detected	0.02091	Detected	0	-0.611947	Detected	-0.250585	Detected	-0.431266	0.141163	1380	1400	790	930	A_33_P3329740	Unknown
A_33_P3329991	0.180879	Detected	-0.180879	Detected	0	-0.309524	Detected	-0.817083	Detected	-0.563304	0.212416	738	566	453	292	A_33_P3329991	Unknown
A_33_P3330084	-0.158079	Compromised	0.158078	Compromised	-2.35e-07	-1.12732	Compromised	-0.88813	Compromised	-1.00773	0.036582	4.45	5.46	1.96	2.12	A_33_P3330084	Unknown
A_33_P3330236	-0.386257	Detected	0.386257	Detected	0	0.574966	Detected	0.47987	Detected	0.527418	0.30811	21.8	36.7	36.6	31.4	A_33_P3330236	Unknown
A_33_P3330413	0.0371923	Detected	-0.0371928	Detected	-2.375e-07	-0.21932	Detected	-0.486483	Detected	-0.352901	0.125887	4530	4240	3270	2490	A_33_P3330413	Unknown
A_33_P3330761	-0.0317483	Compromised	0.0317483	Compromised	0	0.357456	Compromised	0.371136	Compromised	0.364296	0.00785411	2.01	2.07	2.27	2.1	A_33_P3330761	Unknown
A_33_P3330877	-0.510531	Detected	0.510531	Detected	1.25e-07	-0.0723922	Detected	-0.00887299	Detected	-0.0406326	0.943919	10.1	20.2	11.8	11.3	A_33_P3330877	Unknown
A_33_P3330972	0.410699	Compromised	-0.410698	Compromised	2.5e-07	0.894689	Compromised	0.00414562	Compromised	0.449417	0.535437	3.64	2.03	4.39	2.17	A_33_P3330972	Unknown
A_33_P3331272	-0.0391431	Compromised	0.0391431	Compromised	0	0.369292	Compromised	1.09954	Compromised	0.734416	0.183509	1.73	1.8	1.98	3.01	A_33_P3331272	Unknown
A_33_P3331326	0.000829458	Detected	-0.000829458	Detected	0	0.109354	Detected	-0.159635	Detected	-0.0251405	0.868965	1280	1260	1190	905	A_33_P3331326	Unknown
A_33_P3331391	-0.635024	Compromised	0.635024	Compromised	0	0.0925846	Compromised	-0.35004	Compromised	-0.128728	0.865868	2.15	5.11	3.07	2.07	A_33_P3331391	Unknown
A_33_P3331731	-0.0362301	Compromised	0.0362306	Compromised	2.385e-07	0.28546	Compromised	0.498906	Compromised	0.392183	0.073587	1.93	2	2.08	2.21	A_33_P3331731	Unknown
A_33_P3331776	0.0763979	Detected	-0.0763979	Detected	0	-0.0872855	Detected	-0.389025	Detected	-0.238155	0.294381	64.3	57	49.5	36.8	A_33_P3331776	Unknown
A_33_P3331791	-0.0249102	Detected	0.0249102	Detected	0	0.0781524	Detected	-0.246177	Detected	-0.0840125	0.659548	149	152	138	101	A_33_P3331791	Unknown
A_33_P3331911	-0.0495319	Compromised	0.0495319	Compromised	0	0.857198	Compromised	1.92501	Compromised	1.3911	0.121976	1.8	1.9	2.91	5.59	A_33_P3331911	Unknown
A_33_P3331996	-0.0512953	Compromised	0.0512958	Compromised	2.385e-07	0.350857	Compromised	0.756948	Compromised	0.553902	0.118148	1.72	1.82	1.96	2.38	A_33_P3331996	Unknown
A_33_P3332046	0.385051	Compromised	-0.385051	Compromised	0	-0.450938	Compromised	-0.298237	Compromised	-0.374588	0.440667	4.43	2.56	2.14	2.18	A_33_P3332046	Unknown
A_33_P3332541	-0.0493221	Compromised	0.0493226	Compromised	2.375e-07	0.329875	Compromised	0.56531	Compromised	0.447592	0.0725721	1.81	1.91	2.03	2.19	A_33_P3332541	Unknown
A_33_P3332749	7.7486e-05	Detected	-7.7486e-05	Detected	0	0.245035	Detected	-1.00605	Compromised	-0.380508	0.604878	13.7	13.5	14	5.39	A_33_P3332749	Unknown
A_33_P3332989	0.24627	Compromised	-0.24627	Compromised	2.4e-07	0.132936	Compromised	-0.427715	Compromised	-0.147389	0.730988	4.24	2.97	3.38	2.1	A_33_P3332989	Unknown
A_33_P3333003	0.363566	Detected	-0.363566	Detected	0	-0.73296	Compromised	-0.903341	Compromised	-0.818151	0.159819	21.5	12.8	8.67	7.06	A_33_P3333003	Unknown
A_33_P3333058	-0.0636601	Detected	0.0636601	Detected	0	-1.28659	Compromised	0.0582252	Detected	-0.614184	0.459156	15.7	16.9	5.8	13.5	A_33_P3333058	Unknown
A_33_P3333187	0.0653281	Detected	-0.0653281	Detected	0	-0.526392	Detected	-0.660749	Detected	-0.593571	0.0240275	56.1	50.5	32.1	26.8	A_33_P3333187	Unknown
A_33_P3333327	-0.0449262	Compromised	0.0449259	Compromised	-1.195e-07	-0.579412	Compromised	0.675854	Detected	0.0482211	0.945891	8.6	9.02	5.12	11.2	A_33_P3333327	Unknown
A_33_P3333485	0.299025	Compromised	-0.299025	Compromised	-2.4e-07	-0.755374	Compromised	-0.0376711	Compromised	-0.396523	0.485344	5.13	3.34	2.13	3.21	A_33_P3333485	Unknown
A_33_P3333523	0.0673666	Detected	-0.0673661	Detected	2.4e-07	-0.403831	Detected	-0.372174	Detected	-0.388002	0.0303677	2540	2280	1580	1480	A_33_P3333523	Unknown
A_33_P3333560	-0.158336	Detected	0.158336	Detected	0	0.0384471	Detected	-0.640798	Detected	-0.301176	0.505894	34.3	42.1	33.9	19.4	A_33_P3333560	Unknown
A_33_P3333677	-0.249155	Detected	0.249155	Detected	0	-0.61523	Detected	-0.662084	Detected	-0.638657	0.125322	27.8	38.7	18.6	16.5	A_33_P3333677	Unknown
A_33_P3333708	-0.0312331	Detected	0.0312331	Detected	0	0.0435159	Detected	-0.167629	Detected	-0.0620568	0.629756	893	919	811	642	A_33_P3333708	Unknown
A_33_P3333985	-0.0257633	Detected	0.0257633	Detected	0	-0.455363	Detected	-0.451168	Detected	-0.453265	0.00323634	328	335	210	193	A_33_P3333985	Unknown
A_33_P3334000	0.578954	Compromised	-0.578955	Compromised	-2.5e-07	-0.31333	Compromised	0.866622	Compromised	0.276646	0.769705	4.8	2.12	2.23	4.63	A_33_P3334000	Unknown
A_33_P3334043	-0.754998	Compromised	0.754999	Compromised	2.5e-07	-0.364099	Compromised	1.056	Compromised	0.34595	0.770287	1.76	4.94	1.99	4.88	A_33_P3334043	Unknown
A_33_P3334121	-0.0391431	Compromised	0.0391431	Compromised	0	0.467856	Detected	0.634103	Detected	0.55098	0.0266987	8.65	9	10.6	10.9	A_33_P3334121	Unknown
A_33_P3334342	0.0120678	Detected	-0.0120678	Detected	0	0.31374	Detected	0.515012	Detected	0.414376	0.0549452	84.3	81.7	89.6	94.4	A_33_P3334342	Unknown
A_33_P3334428	0.170927	Compromised	-0.170927	Compromised	0	-0.142401	Compromised	0.389903	Compromised	0.123751	0.733372	5.98	4.65	4.15	5.5	A_33_P3334428	Unknown
A_33_P3334718	0.49931	Compromised	-0.49931	Compromised	0	0.529837	Compromised	0.0863109	Compromised	0.308074	0.629629	3.69	1.82	3.25	2.19	A_33_P3334718	Unknown
A_33_P3335401	0.299883	Compromised	-0.299883	Compromised	0	0.976141	Compromised	0.221671	Compromised	0.598906	0.33989	6.72	4.37	9.26	5.03	A_33_P3335401	Unknown
A_33_P3335540	-0.044796	Compromised	0.0447965	Compromised	2.385e-07	0.295741	Compromised	0.531697	Compromised	0.413719	0.0817903	1.85	1.94	2.02	2.18	A_33_P3335540	Unknown
A_33_P3335576	-0.058357	Detected	0.0583568	Detected	-1.19e-07	0.702991	Detected	0.0118854	Compromised	0.357438	0.415046	9.92	10.6	14.5	8.23	A_33_P3335576	Unknown
A_33_P3335606	-0.0340202	Detected	0.0340202	Detected	0	0.0272019	Detected	-0.293836	Detected	-0.133317	0.501843	997	1030	897	658	A_33_P3335606	Unknown
A_33_P3335645	-0.060833	Compromised	0.0608325	Compromised	-2.385e-07	0.333446	Compromised	0.514925	Compromised	0.424185	0.0603807	1.8	1.93	2.04	2.12	A_33_P3335645	Unknown
A_33_P3335905	-0.0105309	Compromised	0.0105305	Compromised	-2.385e-07	0.188455	Compromised	0.428206	Compromised	0.308331	0.124506	1.97	1.97	1.95	2.11	A_33_P3335905	Unknown
A_33_P3336018	-0.0564022	Compromised	0.0564017	Compromised	-2.38e-07	0.315851	Compromised	0.395399	Compromised	0.355625	0.0356602	1.98	2.11	2.21	2.14	A_33_P3336018	Unknown
A_33_P3336038	0.120102	Detected	-0.120101	Detected	2.4e-07	-0.23356	Detected	-0.161016	Detected	-0.197288	0.256458	16300	13600	11000	10600	A_33_P3336038	Unknown
A_33_P3336148	0.0337982	Detected	-0.0337982	Detected	0	-1.3072	Compromised	-1.74805	Compromised	-1.52763	0.0206519	15.1	14.2	5.14	3.47	A_33_P3336148	Unknown
A_33_P3336302	-0.0506158	Compromised	0.0506158	Compromised	0	0.370091	Compromised	0.606048	Compromised	0.48807	0.0627442	1.75	1.85	2.02	2.18	A_33_P3336302	Unknown
A_33_P3336567	-0.321847	Compromised	0.321847	Compromised	2.4e-07	0.301982	Compromised	-0.689976	Compromised	-0.193997	0.773993	4.41	6.79	5.86	2.7	A_33_P3336567	Unknown
A_33_P3337119	-0.0253282	Compromised	0.0253282	Compromised	0	0.232546	Compromised	0.443004	Compromised	0.337775	0.0891588	1.93	1.97	1.99	2.11	A_33_P3337119	Unknown
A_33_P3337742	-0.00368619	Detected	0.00368619	Detected	0	0.103222	Detected	-0.583048	Detected	-0.239913	0.556831	95.3	94.4	88.5	50.4	A_33_P3337742	Unknown
A_33_P3338071	-0.416951	Compromised	0.416951	Compromised	2.4e-07	-0.371366	Compromised	-0.537895	Compromised	-0.454631	0.396901	3	5.27	2.67	2.18	A_33_P3338071	Unknown
A_33_P3338292	-0.625591	Compromised	0.625591	Compromised	-1.2e-07	-1.4155	Compromised	-1.17126	Compromised	-1.29338	0.179593	3.99	9.36	1.99	2.16	A_33_P3338292	Unknown
A_33_P3338379	-0.518084	Compromised	0.518084	Compromised	0	-0.0287428	Compromised	1.30432	Compromised	0.637788	0.528807	1.9	3.84	2.3	5.31	A_33_P3338379	Unknown
A_33_P3338403	-0.0779295	Compromised	0.077929	Compromised	-2.4e-07	0.393846	Compromised	0.462748	Compromised	0.428297	0.037372	1.94	2.13	2.32	2.23	A_33_P3338403	Unknown
A_33_P3338539	-0.0526371	Compromised	0.0526371	Compromised	0	0.32485	Compromised	0.492452	Compromised	0.408651	0.0539426	1.83	1.94	2.05	2.11	A_33_P3338539	Unknown
A_33_P3338788	-0.0463076	Compromised	0.0463071	Compromised	-2.385e-07	0.447987	Compromised	0.546876	Compromised	0.497431	0.0180461	1.77	1.86	2.15	2.11	A_33_P3338788	Unknown
A_33_P3338808	-0.0568552	Compromised	0.0568552	Compromised	0	0.316929	Compromised	2.56899	Compromised	1.44296	0.329	1.96	2.09	2.19	9.56	A_33_P3338808	Unknown
A_33_P3338833	-0.0346355	Compromised	0.0346351	Compromised	-2.385e-07	0.206816	Compromised	0.380105	Compromised	0.293461	0.0879665	2.06	2.13	2.1	2.17	A_33_P3338833	Unknown
A_33_P3338873	-0.631102	Compromised	0.631102	Compromised	1.25e-07	-0.70922	Compromised	0.577675	Compromised	-0.0657725	0.948466	4.15	9.81	3.39	7.58	A_33_P3338873	Unknown
A_33_P3338937	-0.111188	Compromised	0.111188	Compromised	0	-0.886538	Compromised	-0.241265	Compromised	-0.563902	0.240256	7.88	9.06	3.97	5.69	A_33_P3338937	Unknown
A_33_P3339197	0.337466	Compromised	-0.337466	Compromised	0	0.22255	Compromised	0.170196	Compromised	0.196373	0.620459	3.24	2	2.58	2.28	A_33_P3339197	Unknown
A_33_P3339388	-0.0429158	Compromised	0.0429158	Compromised	0	0.330868	Compromised	0.443615	Compromised	0.387242	0.0318825	1.96	2.05	2.19	2.17	A_33_P3339388	Unknown
A_33_P3339446	0.556531	Compromised	-0.556531	Compromised	0	-0.829297	Compromised	0.285659	Compromised	-0.271819	0.762954	5.97	2.72	1.97	3.91	A_33_P3339446	Unknown
A_33_P3339611	-0.0292683	Compromised	0.0292678	Compromised	-2.385e-07	0.335682	Compromised	2.03977	Compromised	1.18773	0.298218	1.9	1.95	2.11	6.3	A_33_P3339611	Unknown
A_33_P3339696	0.230119	Compromised	-0.230119	Compromised	0	-0.309771	Compromised	0.536354	Compromised	0.113292	0.835914	3.49	2.5	2.07	3.41	A_33_P3339696	Unknown
A_33_P3339701	-0.720387	Compromised	0.720388	Compromised	2.4e-07	-0.182506	Compromised	0.876078	Compromised	0.346786	0.735461	3.85	10.3	4.82	9.2	A_33_P3339701	Unknown
A_33_P3339741	-0.662793	Compromised	0.662794	Detected	2.4e-07	-1.3981	Compromised	-1.26546	Compromised	-1.33178	0.183591	4.17	10.3	2.16	2.17	A_33_P3339741	Unknown
A_33_P3340065	0.657523	Compromised	-0.657523	Compromised	0	-0.978178	Compromised	-0.91056	Compromised	-0.944369	0.28791	8.18	3.24	2.27	2.18	A_33_P3340065	Unknown
A_33_P3340114	-0.0510669	Compromised	0.0510664	Compromised	-2.375e-07	0.357368	Compromised	0.628782	Compromised	0.493075	0.0766631	1.73	1.83	1.98	2.19	A_33_P3340114	Unknown
A_33_P3340189	0.33715	Compromised	-0.33715	Compromised	0	-0.129931	Compromised	0.0873475	Compromised	-0.021292	0.957535	3.19	1.97	1.99	2.12	A_33_P3340189	Unknown
A_33_P3340229	-0.145096	Compromised	0.145096	Compromised	0	0.140122	Compromised	-1.21783	Compromised	-0.538853	0.518897	5.51	6.64	5.79	2.07	A_33_P3340229	Unknown
A_33_P3340264	0.23039	Detected	-0.23039	Compromised	-1.2e-07	-0.38091	Compromised	-0.195455	Compromised	-0.288183	0.365681	8.84	6.33	4.99	5.2	A_33_P3340264	Unknown
A_33_P3340424	0.0167377	Detected	-0.0167377	Detected	0	0.175908	Detected	-0.135061	Detected	0.0204237	0.908043	620	597	597	441	A_33_P3340424	Unknown
A_33_P3340454	-0.0537848	Compromised	0.0537853	Compromised	2.385e-07	0.356614	Compromised	0.571723	Compromised	0.464169	0.0610377	1.78	1.89	2.04	2.17	A_33_P3340454	Unknown
A_33_P3340828	0.406345	Detected	-0.406345	Compromised	0	0.141217	Compromised	-0.742038	Compromised	-0.30041	0.666324	13.1	7.35	9.4	4.67	A_33_P3340828	Unknown
A_33_P3340956	-0.0627961	Compromised	0.0627961	Compromised	0	1.4476	Compromised	0.583733	Compromised	1.01567	0.145442	1.73	1.86	4.25	2.14	A_33_P3340956	Unknown
A_33_P3341289	0.506604	Compromised	-0.506605	Compromised	-2.5e-07	-0.327898	Compromised	-0.140223	Compromised	-0.23406	0.694161	4.26	2.08	2.06	2.15	A_33_P3341289	Unknown
A_33_P3341568	-0.0542622	Detected	0.0542622	Detected	0	-0.290578	Detected	-0.831929	Detected	-0.561253	0.179075	128	136	93.7	59	A_33_P3341568	Unknown
A_33_P3341731	-0.0248151	Detected	0.0248151	Detected	0	-0.00650406	Detected	-0.447969	Detected	-0.227237	0.41389	150	153	131	88.4	A_33_P3341731	Unknown
A_33_P3341882	0.145236	Compromised	-0.145236	Compromised	2.4e-07	0.579631	Compromised	0.347423	Compromised	0.463527	0.130214	2.42	1.95	2.82	2.2	A_33_P3341882	Unknown
A_33_P3342146	-0.0314407	Compromised	0.0314407	Compromised	0	0.244551	Compromised	0.43024	Compromised	0.337395	0.0750315	2.04	2.1	2.13	2.22	A_33_P3342146	Unknown
A_33_P3342195	-0.686101	Compromised	0.686101	Compromised	0	0.572001	Compromised	1.47028	Compromised	1.02114	0.339154	1.76	4.49	3.63	6.2	A_33_P3342195	Unknown
A_33_P3342420	-0.0499587	Compromised	0.0499582	Compromised	-2.38e-07	0.339066	Compromised	0.588785	Compromised	0.463926	0.0747328	1.78	1.88	2.01	2.19	A_33_P3342420	Unknown
A_33_P3342953	-0.358975	Compromised	0.358975	Compromised	0	0.356069	Compromised	-0.0593619	Compromised	0.148354	0.754788	2.19	3.55	3.1	2.13	A_33_P3342953	Unknown
A_33_P3343200	-0.0359712	Compromised	0.0359712	Compromised	0	0.331956	Compromised	0.451276	Compromised	0.391616	0.0302183	1.95	2.02	2.17	2.16	A_33_P3343200	Unknown
A_33_P3343305	0.0365527	Detected	-0.0365527	Detected	0	-0.01913	Detected	0.290513	Detected	0.135692	0.48352	36.4	34.1	30.2	34.3	A_33_P3343305	Unknown
A_33_P3343340	-0.0178914	Compromised	0.0178914	Compromised	0	0.565765	Compromised	0.515368	Compromised	0.540566	0.00325246	1.95	1.97	2.52	2.23	A_33_P3343340	Unknown
A_33_P3343394	-0.0634646	Compromised	0.0634651	Compromised	2.4e-07	0.32909	Compromised	0.395641	Compromised	0.362365	0.0369526	1.97	2.12	2.23	2.14	A_33_P3343394	Unknown
A_33_P3343605	0.014235	Compromised	-0.014235	Compromised	0	0.00404596	Compromised	0.0916119	Compromised	0.0478289	0.407973	8	7.73	6.85	6.67	A_33_P3343605	Unknown
A_33_P3344044	-0.051527	Compromised	0.0515275	Compromised	2.385e-07	1.17478	Compromised	1.93909	Compromised	1.55693	0.0562195	1.71	1.81	3.45	5.37	A_33_P3344044	Unknown
A_33_P3344297	0.0327234	Compromised	-0.0327234	Compromised	0	0.0822191	Compromised	0.920438	Compromised	0.501328	0.355349	5.67	5.34	5.06	8.29	A_33_P3344297	Unknown
A_33_P3344521	-0.0374641	Compromised	0.0374641	Compromised	0	1.37719	Compromised	0.773017	Compromised	1.07511	0.0716569	1.84	1.91	4.23	2.55	A_33_P3344521	Unknown
A_33_P3345031	0.0807962	Detected	-0.0807962	Detected	0	-0.0274248	Detected	-0.0340796	Detected	-0.0307522	0.740318	185	163	148	135	A_33_P3345031	Unknown
A_33_P3345108	-0.257102	Compromised	0.257102	Compromised	0	1.46342	Detected	0.988705	Compromised	1.22606	0.0726828	3.73	5.25	10.6	6.99	A_33_P3345108	Unknown
A_33_P3345299	-0.0499587	Compromised	0.0499582	Compromised	-2.38e-07	0.36044	Compromised	0.582182	Compromised	0.471311	0.0605862	1.78	1.88	2.04	2.18	A_33_P3345299	Unknown
A_33_P3345304	-0.0497246	Compromised	0.0497246	Compromised	0	0.32329	Compromised	0.953316	Compromised	0.638303	0.1833	1.97	2.08	2.2	3.12	A_33_P3345304	Unknown
A_33_P3345319	-0.0277476	Compromised	0.0277472	Compromised	-2.385e-07	1.06233	Compromised	0.393243	Compromised	0.727786	0.16244	2.07	2.12	3.8	2.19	A_33_P3345319	Unknown
A_33_P3345409	-0.0348673	Compromised	0.0348678	Compromised	2.385e-07	0.206854	Compromised	0.387285	Compromised	0.29707	0.0916603	2.04	2.11	2.08	2.16	A_33_P3345409	Unknown
A_33_P3345614	0.0602052	Detected	-0.0602052	Detected	0	0.105968	Detected	-0.153703	Detected	-0.0238676	0.882886	182	165	162	124	A_33_P3345614	Unknown
A_33_P3345638	-0.194078	Compromised	0.194078	Compromised	0	-0.669702	Compromised	0.0804391	Compromised	-0.294631	0.557581	5.66	7.3	3.51	5.41	A_33_P3345638	Unknown
A_33_P3345808	-0.051527	Compromised	0.0515275	Compromised	2.385e-07	0.373684	Compromised	0.625198	Compromised	0.499441	0.06672	1.71	1.81	1.98	2.16	A_33_P3345808	Unknown
A_33_P3345821	-0.0466056	Compromised	0.0466056	Compromised	0	2.26885	Compromised	0.447305	Compromised	1.35808	0.274878	1.95	2.05	8.37	2.17	A_33_P3345821	Unknown
A_33_P3346046	-0.021297	Detected	0.021297	Detected	0	0.12202	Detected	-0.524191	Detected	-0.201085	0.597939	79.8	81	76	44.5	A_33_P3346046	Unknown
A_33_P3346062	-0.055758	Compromised	0.055758	Compromised	0	0.377914	Compromised	0.649328	Compromised	0.513621	0.0727973	1.7	1.81	1.98	2.19	A_33_P3346062	Unknown
A_33_P3346331	0.886769	Compromised	-0.88677	Compromised	-2.5e-07	-0.721736	Compromised	-0.165119	Compromised	-0.443428	0.680338	7.32	2.11	2.07	2.79	A_33_P3346331	Unknown
A_33_P3346333	-0.00356126	Detected	0.00356126	Detected	0	-2.21231	Compromised	-1.9858	Compromised	-2.09905	0.00290137	10.4	10.3	1.94	2.08	A_33_P3346333	Unknown
A_33_P3346508	-0.0179579	Detected	0.0179579	Detected	0	0.313951	Detected	-0.402228	Detected	-0.0441382	0.913279	77.3	78.1	83.9	46.8	A_33_P3346508	Unknown
A_33_P3346526	0.05971	Compromised	-0.05971	Compromised	0	-1.41961	Compromised	0.439216	Compromised	-0.490195	0.651196	6.79	6.16	2.1	6.98	A_33_P3346526	Unknown
A_33_P3346533	0.0118387	Detected	-0.0118387	Detected	0	-0.325675	Detected	-1.30686	Detected	-0.816265	0.238142	1310	1270	894	415	A_33_P3346533	Unknown
A_33_P3346610	0.222768	Detected	-0.222768	Detected	0	-0.36111	Detected	-1.94769	Detected	-1.1544	0.296216	88.3	63.9	50.8	15.5	A_33_P3346610	Unknown
A_33_P3346643	-0.0325022	Compromised	0.0325027	Compromised	2.38e-07	0.281732	Compromised	0.495178	Compromised	0.388455	0.0735033	1.94	2	2.08	2.21	A_33_P3346643	Unknown
A_33_P3346691	-0.0501752	Compromised	0.0501752	Compromised	0	0.332551	Compromised	0.536155	Compromised	0.434353	0.0619951	1.77	1.87	1.99	2.1	A_33_P3346691	Unknown
A_33_P3346716	-0.724284	Compromised	0.724284	Compromised	0	-0.636108	Compromised	0.605352	Compromised	-0.015378	0.988601	2.16	5.81	1.98	4.29	A_33_P3346716	Unknown
A_33_P3346881	-0.253521	Compromised	0.253521	Compromised	0	0.100507	Compromised	-0.522252	Compromised	-0.210873	0.651879	3.72	5.21	4.1	2.44	A_33_P3346881	Unknown
A_33_P3347020	-0.0473423	Compromised	0.0473418	Compromised	-2.38e-07	0.316856	Compromised	0.463112	Compromised	0.389984	0.0464496	1.91	2.01	2.12	2.15	A_33_P3347020	Unknown
A_33_P3347049	-0.0185013	Detected	0.0185013	Detected	0	0.542556	Detected	-0.288021	Detected	0.127267	0.788419	18	18.2	22.9	11.8	A_33_P3347049	Unknown
A_33_P3347457	0.637839	Compromised	-0.637839	Compromised	0	-0.410923	Compromised	-0.21875	Compromised	-0.314837	0.673751	5.11	2.08	2.13	2.23	A_33_P3347457	Unknown
A_33_P3347503	-0.0706778	Detected	0.070678	Detected	1.18e-07	0.948591	Detected	-0.684086	Compromised	0.132252	0.886607	11.5	12.5	20.1	5.94	A_33_P3347503	Unknown
A_33_P3347522	0.110927	Detected	-0.110927	Detected	0	0.267631	Detected	0.19941	Detected	0.233521	0.181854	41300	34900	39700	34700	A_33_P3347522	Unknown
A_33_P3347787	0.232799	Detected	-0.2328	Compromised	-1.2e-07	-2.00432	Compromised	-1.8987	Compromised	-1.95151	0.0146351	11.7	8.35	2.14	2.11	A_33_P3347787	Unknown
A_33_P3348046	0.904143	Compromised	-0.904143	Compromised	2.35e-07	-0.6213	Compromised	-0.410428	Compromised	-0.515864	0.628027	6.61	1.86	1.98	2.1	A_33_P3348046	Unknown
A_33_P3348079	-0.0257173	Compromised	0.0257177	Compromised	2.385e-07	0.270025	Compromised	0.473629	Compromised	0.371827	0.0713185	1.88	1.92	1.99	2.1	A_33_P3348079	Unknown
A_33_P3348151	0.100177	Detected	-0.100177	Detected	0	-0.352506	Detected	-0.884996	Compromised	-0.618751	0.161624	24.6	21.1	15.5	9.82	A_33_P3348151	Unknown
A_33_P3348194	0.0104809	Compromised	-0.0104809	Compromised	0	0.20333	Compromised	1.60281	Compromised	0.903072	0.32596	2.09	2.03	2.06	4.98	A_33_P3348194	Unknown
A_33_P3348328	-0.0209098	Compromised	0.0209103	Compromised	2.385e-07	0.240777	Compromised	0.432649	Compromised	0.336713	0.0755272	2.07	2.1	2.14	2.24	A_33_P3348328	Unknown
A_33_P3348509	0.141004	Detected	-0.141004	Detected	0	0.0453827	Detected	-0.674124	Detected	-0.314371	0.501337	28.5	23.1	23	12.8	A_33_P3348509	Unknown
A_33_P3348670	0.0979485	Compromised	-0.0979485	Compromised	0	0.250492	Compromised	0.129257	Compromised	0.189874	0.241043	2.65	2.28	2.54	2.14	A_33_P3348670	Unknown
A_33_P3348744	0.02073	Detected	-0.0207295	Detected	2.385e-07	0.0381069	Detected	-0.120505	Detected	-0.0411992	0.66512	4480	4290	3910	3210	A_33_P3348744	Unknown
A_33_P3348927	-0.0516148	Detected	0.0516148	Detected	0	-1.53835	Compromised	-1.36672	Compromised	-1.45253	0.00471926	27.3	28.9	8.4	8.67	A_33_P3348927	Unknown
A_33_P3349002	-0.102081	Compromised	0.102081	Compromised	0	0.294726	Compromised	-0.0307293	Compromised	0.131999	0.56297	4.36	4.95	4.95	3.62	A_33_P3349002	Unknown
A_33_P3349025	-0.226506	Compromised	0.226506	Compromised	0	-0.104095	Compromised	0.0995092	Compromised	-0.00229287	0.993471	2.12	2.86	1.99	2.1	A_33_P3349025	Unknown
A_33_P3349158	-0.173563	Compromised	0.173563	Compromised	2.35e-07	-0.00900316	Compromised	1.60088	Compromised	0.795936	0.435722	2.09	2.62	2.02	5.65	A_33_P3349158	Unknown
A_33_P3349474	0.0148468	Detected	-0.0148463	Detected	2.385e-07	0.168546	Detected	-0.112484	Detected	0.0280309	0.861084	8100	7819.99	7770	5860	A_33_P3349474	Unknown
A_33_P3349501	0.142282	Detected	-0.142282	Detected	0	-1.10705	Compromised	-1.99196	Compromised	-1.54951	0.0793998	22	17.8	7.98	3.96	A_33_P3349501	Unknown
A_33_P3349597	0.0522349	Detected	-0.0522349	Detected	0	-0.230016	Detected	-1.07353	Detected	-0.651773	0.264846	660	605	468	239	A_33_P3349597	Unknown
A_33_P3349676	0.203891	Compromised	-0.203891	Compromised	2.4e-07	-0.674595	Compromised	-0.409113	Compromised	-0.541854	0.155812	4.2	3.12	1.97	2.17	A_33_P3349676	Unknown
A_33_P3349727	-0.0521946	Compromised	0.0521951	Compromised	2.385e-07	0.33057	Compromised	0.504307	Compromised	0.417439	0.0541924	1.85	1.96	2.08	2.15	A_33_P3349727	Unknown
A_33_P3350196	0.70406	Detected	-0.70406	Compromised	0	-0.358701	Compromised	-0.644208	Compromised	-0.501454	0.557397	16.4	6.09	6.77	5.09	A_33_P3350196	Unknown
A_33_P3350247	-0.0260444	Compromised	0.0260439	Compromised	-2.385e-07	0.336526	Compromised	0.845367	Compromised	0.590946	0.147072	1.84	1.88	2.04	2.66	A_33_P3350247	Unknown
A_33_P3350453	0.513264	Compromised	-0.513264	Compromised	2.5e-07	-0.977731	Compromised	0.410708	Compromised	-0.283511	0.773815	6.78	3.28	2.08	4.99	A_33_P3350453	Unknown
A_33_P3350549	0.146152	Detected	-0.146152	Detected	0	-0.0451372	Detected	-0.328744	Detected	-0.18694	0.455528	105	84.5	79.3	59.7	A_33_P3350549	Unknown
A_33_P3350684	-0.249134	Compromised	0.249134	Compromised	-2.35e-07	0.148997	Compromised	0.405911	Compromised	0.277454	0.426579	1.76	2.45	2	2.19	A_33_P3350684	Unknown
A_33_P3350744	-0.186187	Compromised	0.186187	Detected	-1.2e-07	0.00809479	Compromised	0.069469	Compromised	0.0387819	0.856184	9.72	12.4	9.59	9.17	A_33_P3350744	Unknown
A_33_P3351062	-0.173524	Detected	0.173524	Detected	0	-0.155368	Detected	-0.367399	Compromised	-0.261384	0.327396	14.2	17.8	12.4	9.81	A_33_P3351062	Unknown
A_33_P3351166	0.146906	Detected	-0.146906	Detected	0	-0.141887	Detected	-1.28859	Compromised	-0.715238	0.350371	15.3	12.3	10.8	4.47	A_33_P3351166	Unknown
A_33_P3351276	0.038727	Detected	-0.038727	Detected	0	0.344651	Detected	-0.123289	Detected	0.110681	0.686614	30.3	28.3	32.3	21.4	A_33_P3351276	Unknown
A_33_P3351388	0.0647805	Detected	-0.0647805	Detected	0	-0.0997136	Detected	-0.425605	Detected	-0.262659	0.272871	46.4	41.8	35.7	26.1	A_33_P3351388	Unknown
A_33_P3351524	0.132495	Detected	-0.132495	Detected	0	0.0474396	Detected	-0.653535	Detected	-0.303048	0.503554	139	114	113	63.7	A_33_P3351524	Unknown
A_33_P3351529	0.0791159	Detected	-0.0791159	Detected	0	0.0212259	Detected	-0.0454359	Detected	-0.012105	0.900789	67600.1	59700	56000	49000	A_33_P3351529	Unknown
A_33_P3351790	-0.536261	Compromised	0.536261	Compromised	0	0.862515	Compromised	0.0678067	Compromised	0.465161	0.557952	1.79	3.71	4.07	2.15	A_33_P3351790	Unknown
A_33_P3351791	-0.30388	Compromised	0.303879	Compromised	-2.4e-07	-0.589205	Compromised	-0.377492	Compromised	-0.483348	0.271922	2.77	4.16	1.96	2.08	A_33_P3351791	Unknown
A_33_P3351920	0.158746	Detected	-0.158746	Detected	0	-0.688947	Compromised	0.029506	Compromised	-0.329721	0.489528	12	9.49	5.75	8.67	A_33_P3351920	Unknown
A_33_P3352011	0.171343	Detected	-0.171344	Detected	-1.15e-07	0.273689	Detected	-0.495577	Compromised	-0.110944	0.816844	17.5	13.6	16.2	8.71	A_33_P3352011	Unknown
A_33_P3352268	-0.0353219	Detected	0.0353219	Detected	0	-0.33763	Detected	-1.89203	Compromised	-1.11483	0.288258	42.9	44.4	30	9.36	A_33_P3352268	Unknown
A_33_P3352572	-0.0469704	Compromised	0.0469699	Compromised	-2.385e-07	0.329167	Compromised	0.461814	Compromised	0.395491	0.0397283	1.93	2.03	2.16	2.17	A_33_P3352572	Unknown
A_33_P3352837	0.252801	Compromised	-0.252801	Compromised	0	1.32329	Compromised	0.842244	Compromised	1.08277	0.090049	2.91	2.02	5.27	3.46	A_33_P3352837	Unknown
A_33_P3353275	-0.223663	Compromised	0.223663	Compromised	0	-0.75729	Compromised	-1.12909	Compromised	-0.943188	0.0833626	5.12	6.88	3.05	2.16	A_33_P3353275	Unknown
A_33_P3353431	0.243663	Compromised	-0.243663	Compromised	0	0.0674233	Compromised	0.296255	Compromised	0.181839	0.568989	2.66	1.87	2.03	2.18	A_33_P3353431	Unknown
A_33_P3353630	-0.06513	Detected	0.0651302	Detected	1.195e-07	-1.48821	Compromised	-0.79394	Compromised	-1.14107	0.0839215	9.92	10.7	3.19	4.73	A_33_P3353630	Unknown
A_33_P3353752	-0.313983	Compromised	0.313983	Compromised	2.4e-07	1.24794	Compromised	0.350948	Compromised	0.799445	0.281667	1.74	2.65	4.43	2.18	A_33_P3353752	Unknown
A_33_P3353873	0.252977	Detected	-0.252977	Detected	-1.15e-07	-1.19852	Compromised	-1.53072	Compromised	-1.36462	0.0458279	18.3	12.7	5.77	4.2	A_33_P3353873	Unknown
A_33_P3353906	0.0190885	Detected	-0.0190885	Detected	0	-0.0236208	Detected	-0.0216687	Detected	-0.0226448	0.35782	522	501	437	401	A_33_P3353906	Unknown
A_33_P3354553	0.145764	Detected	-0.145764	Detected	0	-0.024672	Detected	-0.300205	Detected	-0.162439	0.503039	23.1	18.6	17.7	13.4	A_33_P3354553	Unknown
A_33_P3354579	-0.0453482	Compromised	0.0453477	Compromised	-2.385e-07	0.3259	Compromised	0.561335	Compromised	0.443617	0.0722142	1.82	1.91	2.03	2.19	A_33_P3354579	Unknown
A_33_P3354731	-0.0349855	Compromised	0.0349855	Compromised	0	0.241306	Compromised	0.420729	Compromised	0.331017	0.0752001	2.03	2.1	2.12	2.2	A_33_P3354731	Unknown
A_33_P3354783	0.559115	Detected	-0.559115	Compromised	0	-0.0838823	Compromised	-0.455399	Compromised	-0.269641	0.692103	11.3	5.13	6.24	4.42	A_33_P3354783	Unknown
A_33_P3354970	-0.305041	Compromised	0.305041	Compromised	0	0.958591	Compromised	-0.662239	Compromised	0.148176	0.879877	3.55	5.34	7.35	2.19	A_33_P3354970	Unknown
A_33_P3356106	-0.0707979	Compromised	0.0707974	Compromised	-2.4e-07	-0.671948	Compromised	-0.154818	Compromised	-0.413383	0.263016	7.23	7.86	4.11	5.39	A_33_P3356106	Unknown
A_33_P3356182	-0.205419	Detected	0.205419	Detected	0	-0.136017	Compromised	-0.332855	Compromised	-0.234436	0.411564	8.93	11.7	8.08	6.46	A_33_P3356182	Unknown
A_33_P3356366	-0.0900426	Compromised	0.0900421	Compromised	-2.38e-07	-0.703373	Compromised	0.526301	Compromised	-0.0885358	0.89976	3.69	4.12	2.08	4.47	A_33_P3356366	Unknown
A_33_P3356537	-0.0485048	Compromised	0.0485053	Compromised	2.38e-07	1.57046	Compromised	0.501271	Compromised	1.03586	0.19341	1.85	1.95	4.9	2.14	A_33_P3356537	Unknown
A_33_P3356637	0.301293	Detected	-0.301293	Compromised	-1.2e-07	-1.26841	Compromised	-0.766802	Compromised	-1.0176	0.121866	9.26	6.01	2.69	3.49	A_33_P3356637	Unknown
A_33_P3356696	-0.055866	Detected	0.055866	Detected	0	0.0940654	Detected	0.220049	Detected	0.157057	0.203124	18.5	19.7	17.7	17.7	A_33_P3356696	Unknown
A_33_P3357000	-0.0253282	Compromised	0.0253282	Compromised	0	0.289409	Compromised	0.509808	Compromised	0.399608	0.0715759	1.93	1.97	2.07	2.21	A_33_P3357000	Unknown
A_33_P3357232	1.07184	Compromised	-1.07184	Compromised	-2.5e-07	-0.774499	Compromised	-0.550905	Compromised	-0.662702	0.601235	8.34	1.86	2	2.14	A_33_P3357232	Unknown
A_33_P3357879	0.0496166	Detected	-0.0496163	Detected	1.19e-07	0.297539	Detected	-0.210155	Compromised	0.043692	0.881397	12.5	11.5	12.8	8.25	A_33_P3357879	Unknown
A_33_P3358109	-0.39851	Compromised	0.398511	Compromised	2.35e-07	0.129992	Compromised	-0.570573	Compromised	-0.22029	0.718304	3.65	6.25	4.54	2.56	A_33_P3358109	Unknown
A_33_P3358347	-0.0555656	Detected	0.0555656	Detected	0	0.277675	Detected	-0.596342	Detected	-0.159333	0.752223	683	727	742	371	A_33_P3358347	Unknown
A_33_P3358582	-0.915328	Compromised	0.915327	Compromised	-2.25e-07	-0.595826	Compromised	-0.3781	Compromised	-0.486963	0.650064	1.84	6.45	1.98	2.11	A_33_P3358582	Unknown
A_33_P3358653	-0.104882	Compromised	0.104882	Compromised	0	0.573402	Compromised	1.17696	Compromised	0.875183	0.111427	2.29	2.61	3.16	4.4	A_33_P3358653	Unknown
A_33_P3358804	0.0261724	Detected	-0.0261724	Detected	0	0.0974705	Detected	-0.440551	Detected	-0.17154	0.59056	38.3	36.4	34.7	21.9	A_33_P3358804	Unknown
A_33_P3358851	0.734297	Detected	-0.734297	Compromised	0	-0.111256	Compromised	-1.61681	Compromised	-0.864032	0.497645	16.4	5.84	7.87	2.54	A_33_P3358851	Unknown
A_33_P3358855	-1.045	Compromised	1.045	Compromised	0	0.47991	Compromised	-0.492763	Compromised	-0.00642634	0.996058	1.89	7.93	4.69	2.19	A_33_P3358855	Unknown
A_33_P3358905	0.032908	Detected	-0.032908	Detected	0	-0.193623	Detected	0.0483265	Detected	-0.072648	0.620849	30.8	29	22.7	24.6	A_33_P3358905	Unknown
A_33_P3359285	0.0072813	Compromised	-0.0072813	Compromised	0	0.262607	Compromised	0.500381	Compromised	0.381494	0.0852065	2.05	2	2.11	2.28	A_33_P3359285	Unknown
A_33_P3359408	-0.723184	Compromised	0.723184	Compromised	0	-0.495802	Compromised	-0.322952	Compromised	-0.409377	0.630655	2.1	5.64	2.12	2.19	A_33_P3359408	Unknown
A_33_P3359428	-0.0475311	Compromised	0.0475307	Compromised	-2.39e-07	0.317419	Compromised	0.470496	Compromised	0.393958	0.0485261	1.9	2	2.11	2.15	A_33_P3359428	Unknown
A_33_P3359832	-0.00655651	Compromised	0.00655603	Compromised	-2.385e-07	0.299269	Compromised	1.70186	Compromised	1.00056	0.289798	1.82	1.81	1.94	4.7	A_33_P3359832	Unknown
A_33_P3359846	-0.51053	Compromised	0.510531	Compromised	2.25e-07	-0.302676	Compromised	-0.311852	Compromised	-0.307264	0.608425	2.47	4.94	2.46	2.24	A_33_P3359846	Unknown
A_33_P3359869	0.175864	Detected	-0.175864	Compromised	-1.2e-07	-0.551226	Compromised	0.614367	Compromised	0.0315704	0.963353	9.31	7.19	4.85	9.97	A_33_P3359869	Unknown
A_33_P3360007	-0.0105305	Compromised	0.0105309	Compromised	2.385e-07	0.62189	Compromised	0.44916	Compromised	0.535525	0.0253942	1.96	1.96	2.62	2.13	A_33_P3360007	Unknown
A_33_P3360758	0.699338	Detected	-0.699338	Compromised	0	-1.14438	Compromised	-1.85255	Compromised	-1.49847	0.196079	16.4	6.13	3.94	2.21	A_33_P3360758	Unknown
A_33_P3361217	-0.403576	Compromised	0.403576	Compromised	-1.2e-07	-1.57215	Compromised	0.0985575	Compromised	-0.736794	0.510351	5.37	9.26	2.06	6.01	A_33_P3361217	Unknown
A_33_P3361309	0.0744314	Detected	-0.0744319	Detected	-2.38e-07	-0.0668192	Detected	-0.0928383	Detected	-0.0798287	0.401513	24300	21600	19000	17100	A_33_P3361309	Unknown
A_33_P3362239	0.0050385	Detected	-0.0050385	Detected	0	-0.286324	Detected	-0.944207	Detected	-0.615266	0.20237	281	275	198	115	A_33_P3362239	Unknown
A_33_P3362242	-0.0465054	Compromised	0.0465054	Compromised	0	0.365981	Compromised	0.581946	Compromised	0.473963	0.0563799	1.76	1.85	2.02	2.15	A_33_P3362242	Unknown
A_33_P3362320	0.0684571	Compromised	-0.0684576	Compromised	-2.35e-07	-1.02851	Compromised	-0.861112	Compromised	-0.944813	0.0128463	5.11	4.58	2.06	2.12	A_33_P3362320	Unknown
A_33_P3362392	-0.274345	Compromised	0.274345	Compromised	0	-0.705373	Compromised	-0.466732	Compromised	-0.586053	0.189209	3.08	4.44	1.97	2.13	A_33_P3362392	Unknown
A_33_P3362548	-0.0585768	Detected	0.0585768	Detected	0	-0.021498	Detected	0.0108001	Detected	-0.00534892	0.937873	75.5	80.7	66.8	62.6	A_33_P3362548	Unknown
A_33_P3362567	0.100177	Detected	-0.100177	Detected	0	-0.0740411	Detected	-0.189764	Detected	-0.131902	0.372356	492	422	376	318	A_33_P3362567	Unknown
A_33_P3362601	0.100978	Compromised	-0.100979	Compromised	-2.38e-07	-0.198815	Compromised	-0.396101	Compromised	-0.297458	0.169667	3.84	3.29	2.69	2.15	A_33_P3362601	Unknown
A_33_P3362937	-0.0489092	Compromised	0.0489092	Compromised	0	0.27115	Compromised	0.475521	Compromised	0.373335	0.0810436	1.83	1.93	1.97	2.08	A_33_P3362937	Unknown
A_33_P3363100	-0.174318	Detected	0.174318	Detected	0	-0.463111	Detected	-1.70486	Compromised	-1.08399	0.2348	20.4	25.6	14.4	5.58	A_33_P3363100	Unknown
A_33_P3363105	-0.860097	Compromised	0.860097	Compromised	0	-0.419157	Compromised	-0.161614	Compromised	-0.290385	0.770216	1.7	5.52	1.99	2.18	A_33_P3363105	Unknown
A_33_P3363161	-0.0493221	Compromised	0.0493226	Compromised	2.375e-07	0.322751	Compromised	0.571882	Compromised	0.447316	0.0791956	1.81	1.91	2.02	2.2	A_33_P3363161	Unknown
A_33_P3363173	0.113719	Detected	-0.113719	Detected	0	-0.248435	Detected	0.00760913	Detected	-0.120413	0.554766	15.8	13.3	10.6	11.6	A_33_P3363173	Unknown
A_33_P3363254	0.0480235	Detected	-0.0480235	Detected	0	0.0739672	Detected	1.05351	Detected	0.563737	0.370572	29.5	27.2	25.9	46.8	A_33_P3363254	Unknown
A_33_P3363290	-0.0549979	Compromised	0.0549974	Compromised	-2.38e-07	0.375133	Compromised	0.618248	Compromised	0.496691	0.0651807	1.73	1.84	2.01	2.18	A_33_P3363290	Unknown
A_33_P3363507	-0.0330744	Compromised	0.0330749	Compromised	2.38e-07	0.332635	Compromised	0.48584	Compromised	0.409238	0.0391449	1.89	1.95	2.1	2.14	A_33_P3363507	Unknown
A_33_P3363650	-0.0535502	Compromised	0.0535507	Compromised	2.385e-07	0.291051	Compromised	0.509683	Compromised	0.400367	0.0813237	1.79	1.9	1.96	2.09	A_33_P3363650	Unknown
A_33_P3363690	-0.412419	Compromised	0.412419	Compromised	2.4e-07	0.944089	Compromised	1.41448	Compromised	1.17929	0.13098	1.73	3.02	3.82	4.85	A_33_P3363690	Unknown
A_33_P3363893	0.106579	Compromised	-0.10658	Compromised	-2.38e-07	0.571492	Compromised	2.11077	Detected	1.34113	0.226475	3.47	2.95	4.13	11	A_33_P3363893	Unknown
A_33_P3363959	0.715392	Compromised	-0.715392	Compromised	2.3e-07	-0.435283	Compromised	-0.329018	Compromised	-0.382151	0.647492	5.69	2.08	2.21	2.18	A_33_P3363959	Unknown
A_33_P3364358	-0.0510669	Compromised	0.0510664	Compromised	-2.375e-07	0.364636	Compromised	0.628782	Compromised	0.496709	0.0725385	1.73	1.83	1.99	2.19	A_33_P3364358	Unknown
A_33_P3364493	0.0566199	Detected	-0.0566199	Detected	0	-0.290789	Detected	-1.37672	Detected	-0.833757	0.266256	108	98.4	73.2	31.6	A_33_P3364493	Unknown
A_33_P3364498	0.0823238	Detected	-0.0823238	Detected	0	0.774038	Detected	-0.145783	Detected	0.314128	0.57064	919	808	1280	620	A_33_P3364498	Unknown
A_33_P3364836	0.119403	Detected	-0.119403	Detected	1.175e-07	-1.23217	Compromised	-0.215811	Detected	-0.723991	0.29982	18.2	15.2	6.15	11.4	A_33_P3364836	Unknown
A_33_P3364929	-0.0214329	Compromised	0.0214329	Compromised	0	0.192274	Compromised	0.410451	Compromised	0.301363	0.113404	1.97	2	1.97	2.1	A_33_P3364929	Unknown
A_33_P3365057	0.209968	Compromised	-0.209968	Compromised	0	0.0838246	Compromised	0.900969	Compromised	0.492397	0.395953	2.43	1.79	1.92	3.1	A_33_P3365057	Unknown
A_33_P3365200	-0.564742	Compromised	0.564742	Compromised	2.5e-07	1.49696	Compromised	1.08982	Compromised	1.29339	0.164006	2.05	4.42	7.38	5.1	A_33_P3365200	Unknown
A_33_P3365267	-0.385692	Detected	0.385693	Detected	1.2e-07	-0.325232	Detected	-2.64445	Compromised	-1.48484	0.348331	12.9	21.7	11.6	2.13	A_33_P3365267	Unknown
A_33_P3365501	0.469106	Compromised	-0.469106	Compromised	-2.4e-07	-0.730696	Compromised	0.647071	Compromised	-0.0418125	0.964548	9.43	4.85	3.54	8.43	A_33_P3365501	Unknown
A_33_P3365644	0.509087	Compromised	-0.509087	Compromised	0	0.125463	Compromised	-0.935885	Compromised	-0.405211	0.636952	8.2	3.99	5.42	2.38	A_33_P3365644	Unknown
A_33_P3365666	0.121583	Detected	-0.121583	Detected	0	-0.234845	Detected	-0.989985	Detected	-0.612415	0.262597	48.4	40.3	32.6	17.7	A_33_P3365666	Unknown
A_33_P3365845	0.576718	Compromised	-0.576718	Compromised	-2.4e-07	-0.432982	Compromised	-0.244415	Compromised	-0.338699	0.620779	4.74	2.1	2.03	2.12	A_33_P3365845	Unknown
A_33_P3365963	0.107098	Detected	-0.107098	Detected	0	0.533535	Detected	0.0733917	Detected	0.303463	0.354328	1070	909	1240	826	A_33_P3365963	Unknown
A_33_P3366179	-0.844459	Compromised	0.844458	Compromised	-2.5e-07	-0.330707	Compromised	0.0645971	Compromised	-0.133055	0.892151	1.86	5.91	2.29	2.76	A_33_P3366179	Unknown
A_33_P3366224	-0.00526524	Detected	0.00526571	Detected	2.3835e-07	-0.26549	Detected	-0.465082	Detected	-0.365286	0.0673705	2750	2730	1980	1580	A_33_P3366224	Unknown
A_33_P3366321	-0.044796	Compromised	0.0447965	Compromised	2.385e-07	0.351775	Compromised	0.511705	Compromised	0.43174	0.0422359	1.85	1.94	2.1	2.15	A_33_P3366321	Unknown
A_33_P3366412	0.238493	Detected	-0.238493	Compromised	0	-1.02302	Compromised	-0.553283	Compromised	-0.788154	0.14274	12.4	8.78	4.46	5.66	A_33_P3366412	Unknown
A_33_P3366471	-0.0552483	Compromised	0.0552483	Compromised	0	0.368818	Compromised	1.44314	Compromised	0.905979	0.235396	1.72	1.83	1.99	3.84	A_33_P3366471	Unknown
A_33_P3366493	-0.238215	Compromised	0.238215	Compromised	0	-0.302494	Compromised	1.47693	Compromised	0.587219	0.589015	2.91	3.99	2.4	7.55	A_33_P3366493	Unknown
A_33_P3366614	-0.0512953	Compromised	0.0512958	Compromised	2.385e-07	0.358199	Compromised	1.05689	Compromised	0.707543	0.182979	1.72	1.82	1.97	2.93	A_33_P3366614	Unknown
A_33_P3366739	0.596918	Compromised	-0.596919	Compromised	-2.5e-07	0.297891	Compromised	-0.102562	Compromised	0.0976641	0.890967	4.48	1.93	3.14	2.18	A_33_P3366739	Unknown
A_33_P3367681	-0.051527	Compromised	0.0515275	Compromised	2.385e-07	0.366379	Compromised	0.638495	Compromised	0.502437	0.074588	1.71	1.81	1.97	2.18	A_33_P3367681	Unknown
A_33_P3367970	0.0990784	Detected	-0.0990784	Detected	0	-0.0708201	Detected	-0.111656	Detected	-0.0912379	0.462293	22.7	19.5	17.4	15.5	A_33_P3367970	Unknown
A_33_P3368034	0.0538845	Compromised	-0.053884	Compromised	2.38e-07	0.253019	Compromised	1.55137	Compromised	0.902192	0.300313	1.99	1.82	1.97	4.44	A_33_P3368034	Unknown
A_33_P3368144	0.261497	Detected	-0.261497	Detected	-1.2e-07	-0.450158	Detected	-1.57225	Compromised	-1.01121	0.243946	22.6	15.5	11.9	5.01	A_33_P3368144	Unknown
A_33_P3368303	-0.0501752	Compromised	0.0501752	Compromised	0	0.332551	Compromised	0.590094	Compromised	0.461322	0.0792275	1.77	1.87	1.99	2.18	A_33_P3368303	Unknown
A_33_P3368445	0.201075	Detected	-0.201075	Compromised	-1.2e-07	-0.23712	Compromised	-1.92234	Compromised	-1.07973	0.338803	11.8	8.8	7.51	2.14	A_33_P3368445	Unknown
A_33_P3368822	-0.0425959	Compromised	0.0425959	Compromised	0	0.242194	Compromised	0.442525	Compromised	0.34236	0.087949	1.98	2.07	2.08	2.19	A_33_P3368822	Unknown
A_33_P3368900	-0.0166566	Detected	0.0166566	Detected	0	0.0616987	Detected	-0.0909789	Detected	-0.0146401	0.868657	46.9	47.3	42.7	35.2	A_33_P3368900	Unknown
A_33_P3369398	-0.0370398	Compromised	0.0370402	Compromised	2.385e-07	0.330213	Compromised	0.490466	Compromised	0.410339	0.0432951	1.87	1.94	2.08	2.13	A_33_P3369398	Unknown
A_33_P3369731	0.102056	Detected	-0.102057	Detected	-1.2e-07	-0.555096	Compromised	-0.937599	Compromised	-0.746347	0.0749952	17.3	14.8	9.46	6.65	A_33_P3369731	Unknown
A_33_P3369864	-0.0503941	Compromised	0.0503945	Compromised	2.375e-07	0.340506	Compromised	0.604651	Compromised	0.472579	0.0790168	1.76	1.86	1.99	2.19	A_33_P3369864	Unknown
A_33_P3370217	-0.0439148	Compromised	0.0439153	Compromised	2.375e-07	0.229293	Compromised	0.440165	Compromised	0.334729	0.0993774	1.9	1.99	1.98	2.1	A_33_P3370217	Unknown
A_33_P3370325	0.126629	Compromised	-0.126629	Compromised	0	0.125212	Compromised	0.382755	Compromised	0.253983	0.294876	2.31	1.91	1.99	2.18	A_33_P3370325	Unknown
A_33_P3370515	0.0316038	Detected	-0.0316038	Detected	0	0.182576	Detected	0.0646324	Detected	0.123604	0.20595	141000	133000	135000	114000	A_33_P3370515	Unknown
A_33_P3370612	-0.0512953	Compromised	0.0512958	Compromised	2.385e-07	0.365503	Compromised	0.630314	Compromised	0.497909	0.072585	1.72	1.82	1.98	2.18	A_33_P3370612	Unknown
A_33_P3371144	-0.0458584	Detected	0.0458579	Detected	-2.385e-07	0.264782	Detected	-0.13052	Detected	0.067131	0.7722	2590	2720	2770	1930	A_33_P3371144	Unknown
A_33_P3371243	-0.0481095	Compromised	0.0481095	Compromised	0	0.326062	Compromised	0.486154	Compromised	0.406108	0.0490275	1.87	1.97	2.09	2.14	A_33_P3371243	Unknown
A_33_P3371260	-0.52642	Compromised	0.52642	Compromised	-1e-07	-1.49393	Compromised	-0.958383	Compromised	-1.22616	0.173532	4.49	9.18	1.98	2.63	A_33_P3371260	Unknown
A_33_P3371450	0.181494	Compromised	-0.181494	Compromised	0	0.0883942	Compromised	0.214377	Compromised	0.151386	0.513261	2.61	2	2.11	2.11	A_33_P3371450	Unknown
A_33_P3371769	0.000209093	Detected	-0.000209093	Detected	0	0.185206	Detected	-0.0870321	Detected	0.0490868	0.752912	2030	2000	1990	1510	A_33_P3371769	Unknown
A_33_P3372090	0.150433	Detected	-0.150433	Detected	0	-0.334857	Detected	-0.00805497	Detected	-0.171456	0.520873	25	20	15.4	17.7	A_33_P3372090	Unknown
A_33_P3372104	0.63006	Compromised	-0.63006	Compromised	0	-0.287239	Compromised	-0.43199	Compromised	-0.359614	0.627847	5.76	2.37	2.63	2.18	A_33_P3372104	Unknown
A_33_P3372207	0.217557	Detected	-0.217557	Detected	0	-1.01304	Compromised	-0.197206	Compromised	-0.605122	0.320742	16.6	12.1	6.1	9.84	A_33_P3372207	Unknown
A_33_P3372659	-0.539851	Compromised	0.539852	Compromised	2.35e-07	-0.550638	Compromised	0.407718	Compromised	-0.07146	0.930169	2.29	4.77	1.96	3.49	A_33_P3372659	Unknown
A_33_P3373009	-0.0316448	Compromised	0.0316448	Compromised	0	0.412594	Compromised	0.364079	Compromised	0.388337	0.0103783	2.02	2.08	2.37	2.1	A_33_P3373009	Unknown
A_33_P3373014	-0.0565901	Compromised	0.0565896	Compromised	-2.385e-07	0.314658	Compromised	0.556665	Compromised	0.435662	0.0825422	1.82	1.94	2.03	2.2	A_33_P3373014	Unknown
A_33_P3373119	-0.122732	Compromised	0.122732	Compromised	1.19e-07	-0.194042	Compromised	0.587328	Compromised	0.196643	0.678482	8.2	9.58	6.73	10.6	A_33_P3373119	Unknown
A_33_P3373194	0.482664	Compromised	-0.482664	Compromised	2.35e-07	-0.217373	Compromised	0.0727987	Compromised	-0.0722871	0.899099	4.22	2.13	2.24	2.51	A_33_P3373194	Unknown
A_33_P3373200	0.154274	Detected	-0.154274	Detected	0	-0.632019	Detected	-0.917933	Detected	-0.774976	0.066404	61.2	48.7	30.6	23	A_33_P3373200	Unknown
A_33_P3373418	-0.0597324	Compromised	0.0597324	Compromised	0	0.366635	Compromised	0.625454	Compromised	0.496045	0.0735657	1.7	1.82	1.97	2.16	A_33_P3373418	Unknown
A_33_P3373580	-0.679554	Compromised	0.679555	Compromised	2.4e-07	-0.28337	Compromised	-0.0944986	Compromised	-0.188934	0.808867	1.78	4.5	2.02	2.11	A_33_P3373580	Unknown
A_33_P3373584	-0.0398283	Compromised	0.0398278	Compromised	-2.38e-07	0.232473	Compromised	0.448872	Compromised	0.340673	0.0979935	1.93	2.01	2.01	2.14	A_33_P3373584	Unknown
A_33_P3373690	-0.169835	Compromised	0.169835	Compromised	0	0.867715	Compromised	0.454832	Compromised	0.661274	0.13186	1.74	2.17	3.08	2.12	A_33_P3373690	Unknown
A_33_P3373715	-0.365236	Detected	0.365236	Detected	1.15e-07	-0.141814	Detected	-0.201576	Detected	-0.171695	0.685511	14.8	24.2	14.9	13.1	A_33_P3373715	Unknown
A_33_P3373795	-0.548664	Compromised	0.548664	Compromised	0	-0.142312	Compromised	0.114603	Compromised	-0.0138545	0.982617	1.75	3.69	2	2.19	A_33_P3373795	Unknown
A_33_P3373970	0.231699	Compromised	-0.231699	Compromised	2.4e-07	0.0335922	Compromised	1.80137	Compromised	0.917481	0.421082	2.98	2.13	2.24	6.99	A_33_P3373970	Unknown
A_33_P3374215	-0.0806763	Detected	0.0806763	Detected	0	-0.0087769	Detected	-0.498562	Detected	-0.253669	0.428925	23.5	25.9	21.3	13.9	A_33_P3374215	Unknown
A_33_P3374253	0.0824444	Detected	-0.0824444	Detected	0	0.166344	Detected	-0.598138	Detected	-0.215897	0.636324	43	37.8	39.3	21.2	A_33_P3374253	Unknown
A_33_P3374365	0.0899932	Detected	-0.0899932	Detected	0	1.42728	Detected	0.657094	Detected	1.04218	0.118858	123	107	268	144	A_33_P3374365	Unknown
A_33_P3374903	0.0390167	Detected	-0.0390167	Detected	0	0.252724	Detected	0.860156	Detected	0.55644	0.210828	46.7	43.6	46.7	65.2	A_33_P3374903	Unknown
A_33_P3374982	-0.4601	Compromised	0.4601	Compromised	0	0.51996	Compromised	-0.0792522	Compromised	0.220354	0.726993	3.11	5.8	5.29	3.2	A_33_P3374982	Unknown
A_33_P3375026	-0.0897455	Detected	0.0897453	Detected	-1.2e-07	-0.443079	Compromised	0.0690289	Compromised	-0.187025	0.561864	11.2	12.5	7.56	9.88	A_33_P3375026	Unknown
A_33_P3375269	0.104776	Compromised	-0.104776	Compromised	0	0.160221	Compromised	-1.02791	Compromised	-0.433842	0.546701	6.16	5.25	5.52	2.22	A_33_P3375269	Unknown
A_33_P3375348	-0.398542	Detected	0.398542	Detected	0	0.113141	Detected	-0.201909	Compromised	-0.0443841	0.926961	9.11	15.6	11.2	8.25	A_33_P3375348	Unknown
A_33_P3375496	-0.0668449	Detected	0.0668449	Detected	0	0.0773969	Detected	0.531763	Detected	0.30458	0.32718	234	253	223	280	A_33_P3375496	Unknown
A_33_P3375513	0.207354	Compromised	-0.207354	Compromised	2.4e-07	0.073648	Compromised	0.316207	Compromised	0.194927	0.502318	2.57	1.9	2.02	2.19	A_33_P3375513	Unknown
A_33_P3375626	-0.0105309	Compromised	0.0105305	Compromised	-2.385e-07	0.366406	Compromised	0.518984	Compromised	0.442695	0.0289548	1.92	1.92	2.15	2.19	A_33_P3375626	Unknown
A_33_P3375657	-0.249762	Compromised	0.249763	Compromised	2.4e-07	0.110263	Compromised	0.335294	Compromised	0.222779	0.501493	1.78	2.48	1.97	2.11	A_33_P3375657	Unknown
A_33_P3375794	-0.0555019	Compromised	0.0555015	Compromised	-2.39e-07	0.362404	Compromised	0.614529	Compromised	0.488467	0.0711343	1.71	1.82	1.97	2.15	A_33_P3375794	Unknown
A_33_P3375889	0.829192	Compromised	-0.829191	Compromised	2.5e-07	-0.572097	Compromised	-0.351254	Compromised	-0.461676	0.636447	6.31	1.97	2.06	2.2	A_33_P3375889	Unknown
A_33_P3375899	0.159241	Detected	-0.159241	Compromised	0	-0.8217	Compromised	0.108888	Compromised	-0.356406	0.543945	10.3	8.14	4.5	7.86	A_33_P3375899	Unknown
A_33_P3375910	-0.241483	Detected	0.241482	Detected	-1.15e-07	0.434128	Detected	0.177642	Detected	0.305885	0.379591	10.6	14.6	14.6	11.2	A_33_P3375910	Unknown
A_33_P3376021	-0.051527	Compromised	0.0515275	Compromised	2.385e-07	0.366379	Compromised	0.638495	Compromised	0.502437	0.074588	1.71	1.81	1.97	2.18	A_33_P3376021	Unknown
A_33_P3376075	-0.00496054	Detected	0.00496054	Detected	0	0.121052	Detected	-0.465246	Detected	-0.172097	0.616652	39	38.7	36.7	22.4	A_33_P3376075	Unknown
A_33_P3376273	0.20884	Detected	-0.20884	Compromised	1.2e-07	0.379155	Detected	1.2465	Detected	0.812828	0.233339	13.5	9.96	13.1	21.9	A_33_P3376273	Unknown
A_33_P3376745	-0.559289	Compromised	0.559289	Compromised	0	0.544395	Compromised	0.53342	Compromised	0.538908	0.436952	2.86	6.12	5.3	4.82	A_33_P3376745	Unknown
A_33_P3376781	-0.00790763	Detected	0.00790763	Detected	0	0.494354	Detected	-0.242744	Detected	0.125805	0.765417	551	549	673	370	A_33_P3376781	Unknown
A_33_P3376836	0.0565155	Detected	-0.0565155	Detected	0	-0.349297	Detected	-0.236489	Detected	-0.292893	0.0669414	1690	1540	1100	1090	A_33_P3376836	Unknown
A_33_P3377274	-0.0823832	Detected	0.0823832	Detected	0	-0.585397	Detected	-0.746295	Detected	-0.665846	0.0286284	40.1	44.3	24.4	20	A_33_P3377274	Unknown
A_33_P3377714	-0.302243	Compromised	0.302243	Compromised	0	-0.577656	Compromised	-0.304205	Compromised	-0.44093	0.315138	3.13	4.69	2.23	2.47	A_33_P3377714	Unknown
A_33_P3378269	-0.0512953	Compromised	0.0512958	Compromised	2.385e-07	0.530562	Compromised	0.610323	Compromised	0.570443	0.0127265	1.72	1.82	2.22	2.15	A_33_P3378269	Unknown
A_33_P3378412	-0.0105307	Detected	0.0105307	Detected	0	-0.400184	Compromised	0.139335	Detected	-0.130424	0.676728	14.6	14.6	9.61	12.8	A_33_P3378412	Unknown
A_33_P3378684	-0.0435753	Compromised	0.0435753	Compromised	0	0.340057	Compromised	0.472703	Compromised	0.40638	0.0360824	1.92	2.01	2.16	2.17	A_33_P3378684	Unknown
A_33_P3378737	0.0825987	Compromised	-0.0825987	Compromised	0	-0.341125	Compromised	-0.140444	Compromised	-0.240784	0.205114	3.22	2.83	2.07	2.18	A_33_P3378737	Unknown
A_33_P3379056	0.0492013	Detected	-0.0492013	Detected	0	-0.815625	Detected	-1.25407	Compromised	-1.03485	0.0440457	30.2	27.8	14.3	9.67	A_33_P3379056	Unknown
A_33_P3379136	-0.0560174	Compromised	0.0560174	Compromised	0	0.386167	Compromised	0.65758	Compromised	0.521873	0.0708353	1.69	1.8	1.98	2.19	A_33_P3379136	Unknown
A_33_P3379231	-0.0523596	Compromised	0.0523601	Compromised	2.39e-07	0.3495	Compromised	0.424181	Compromised	0.386841	0.0265425	2.01	2.13	2.29	2.21	A_33_P3379231	Unknown
A_33_P3379776	-0.055758	Compromised	0.055758	Compromised	0	0.385182	Compromised	0.649328	Compromised	0.517255	0.0689638	1.7	1.81	1.99	2.19	A_33_P3379776	Unknown
A_33_P3380006	1.24376	Detected	-1.24376	Compromised	2.5e-07	0.281929	Compromised	-0.65019	Compromised	-0.18413	0.902441	10.3	1.81	4.56	2.19	A_33_P3380006	Unknown
A_33_P3380076	-0.0422821	Compromised	0.0422821	Compromised	0	0.334924	Compromised	0.428339	Compromised	0.381631	0.0261884	2	2.09	2.24	2.19	A_33_P3380076	Unknown
A_33_P3380252	-0.0444384	Compromised	0.0444388	Compromised	2.39e-07	0.343473	Compromised	0.516542	Compromised	0.430008	0.047556	1.87	1.96	2.11	2.18	A_33_P3380252	Unknown
A_33_P3380913	0.0781674	Detected	-0.0781674	Detected	0	-0.539526	Detected	-0.606188	Detected	-0.572857	0.0213038	24.2	21.4	13.6	11.9	A_33_P3380913	Unknown
A_33_P3381132	0.104722	Detected	-0.104722	Compromised	1.175e-07	-0.893217	Compromised	-0.70012	Compromised	-0.796668	0.0305108	10.7	9.12	4.62	4.84	A_33_P3381132	Unknown
A_33_P3381292	0.0537796	Detected	-0.0537796	Detected	0	0.463575	Detected	0.0635638	Detected	0.263569	0.331089	68	62.2	77.9	54.1	A_33_P3381292	Unknown
A_33_P3381305	-0.167109	Detected	0.167109	Detected	0	-0.276697	Detected	-0.805724	Detected	-0.541211	0.22581	264	328	211	134	A_33_P3381305	Unknown
A_33_P3381443	-0.0173678	Compromised	0.0173683	Compromised	2.385e-07	1.00173	Compromised	0.428256	Compromised	0.714993	0.130546	2.1	2.12	3.67	2.26	A_33_P3381443	Unknown
A_33_P3381613	-0.309417	Compromised	0.309417	Detected	1.15e-07	-0.351044	Compromised	-0.412368	Compromised	-0.381706	0.34447	5.98	9.05	5.01	4.4	A_33_P3381613	Unknown
A_33_P3381762	-0.0909421	Detected	0.0909421	Detected	0	0.618846	Detected	0.584222	Detected	0.601534	0.0228752	424	474	598	535	A_33_P3381762	Unknown
A_33_P3381796	-0.253712	Compromised	0.253711	Compromised	-1.2e-07	-0.949079	Compromised	-0.0853114	Compromised	-0.517195	0.410325	6.61	9.26	3.52	5.87	A_33_P3381796	Unknown
A_33_P3382105	-0.0224321	Detected	0.0224321	Detected	0	-0.0648429	Detected	-0.426837	Detected	-0.24584	0.310057	541	550	453	323	A_33_P3382105	Unknown
A_33_P3382111	-0.258607	Detected	0.258607	Detected	0	-0.582731	Compromised	-1.05664	Compromised	-0.819683	0.144458	13.4	18.9	9.23	6.09	A_33_P3382111	Unknown
A_33_P3382118	-0.101468	Detected	0.101468	Detected	0	-0.405106	Detected	0.257477	Detected	-0.0738146	0.851039	521	591	364	528	A_33_P3382118	Unknown
A_33_P3382137	-0.751695	Compromised	0.751695	Compromised	0	0.41481	Compromised	-0.54827	Compromised	-0.06673	0.947217	2.33	6.51	4.51	2.12	A_33_P3382137	Unknown
A_33_P3382634	0.443265	Detected	-0.443265	Detected	0	-0.337425	Detected	-0.0831173	Detected	-0.210271	0.693131	25.7	13.7	12.9	14.1	A_33_P3382634	Unknown
A_33_P3382685	-0.0469089	Compromised	0.0469089	Compromised	0	0.374906	Compromised	0.611389	Compromised	0.493147	0.0605562	1.74	1.83	2.01	2.17	A_33_P3382685	Unknown
A_33_P3382949	-0.188163	Compromised	0.188163	Compromised	0	-0.611886	Compromised	-0.0277967	Compromised	-0.319842	0.454429	3.08	3.94	1.98	2.72	A_33_P3382949	Unknown
A_33_P3383009	0.641065	Compromised	-0.641065	Compromised	2.3e-07	-0.595261	Compromised	-0.515081	Compromised	-0.555171	0.478513	6.12	2.48	2.24	2.17	A_33_P3383009	Unknown
A_33_P3383075	0.914302	Compromised	-0.914302	Compromised	0	-0.60618	Compromised	-0.412452	Compromised	-0.509316	0.635278	6.92	1.92	2.08	2.18	A_33_P3383075	Unknown
A_33_P3383084	-0.0491147	Compromised	0.0491147	Compromised	0	0.357237	Compromised	0.550965	Compromised	0.454101	0.0527168	1.82	1.92	2.08	2.18	A_33_P3383084	Unknown
A_33_P3383371	0.123355	Detected	-0.123355	Detected	0	-0.641031	Detected	-0.950416	Detected	-0.795723	0.0566251	183	152	92.9	68.7	A_33_P3383371	Unknown
A_33_P3383486	-0.0179291	Compromised	0.0179296	Compromised	2.385e-07	0.239721	Compromised	0.456558	Compromised	0.34814	0.0868522	1.94	1.96	2	2.13	A_33_P3383486	Unknown
A_33_P3383531	-0.923731	Compromised	0.923731	Compromised	0	-0.514237	Compromised	0.118978	Compromised	-0.19763	0.858333	1.72	6.1	1.97	2.8	A_33_P3383531	Unknown
A_33_P3383762	0.0305698	Detected	-0.0305698	Detected	0	0.0947378	Detected	-0.804111	Detected	-0.354687	0.513551	32.5	30.7	29.3	14.4	A_33_P3383762	Unknown
A_33_P3383900	0.591458	Compromised	-0.591457	Compromised	2.35e-07	0.212868	Compromised	0.00251245	Compromised	0.10769	0.874248	4.93	2.14	3.27	2.59	A_33_P3383900	Unknown
A_33_P3384255	0.659756	Compromised	-0.659756	Compromised	0	0.144964	Compromised	0.286214	Compromised	0.215589	0.776085	6.23	2.46	3.76	3.8	A_33_P3384255	Unknown
A_33_P3384337	0.143414	Compromised	-0.143414	Compromised	2.4e-07	-1.04165	Compromised	-0.948384	Compromised	-0.995018	0.0222082	5.88	4.75	2.23	2.18	A_33_P3384337	Unknown
A_33_P3384427	-0.0570855	Compromised	0.0570855	Compromised	0	0.337194	Compromised	0.532219	Compromised	0.434706	0.0614059	1.8	1.92	2.04	2.14	A_33_P3384427	Unknown
A_33_P3384552	-0.165582	Compromised	0.165582	Compromised	2.4e-07	1.08087	Compromised	1.58177	Compromised	1.33132	0.04728	1.96	2.43	4.01	5.2	A_33_P3384552	Unknown
A_33_P3384913	0.275278	Compromised	-0.275278	Compromised	0	0.0613785	Compromised	0.318293	Compromised	0.189836	0.595816	2.69	1.81	2	2.19	A_33_P3384913	Unknown
A_33_P3384942	-0.045917	Compromised	0.0459175	Compromised	2.38e-07	0.335026	Compromised	0.531056	Compromised	0.433041	0.0571692	1.79	1.88	2.01	2.11	A_33_P3384942	Unknown
A_33_P3385351	0.048254	Detected	-0.048254	Detected	0	0.471753	Detected	-0.066947	Detected	0.202403	0.536536	115	106	133	83.9	A_33_P3385351	Unknown
A_33_P3385431	-0.028255	Compromised	0.028255	Compromised	0	0.262321	Compromised	0.461283	Compromised	0.361802	0.0728829	2.01	2.06	2.12	2.23	A_33_P3385431	Unknown
A_33_P3385441	-0.0552483	Compromised	0.0552483	Compromised	0	0.37605	Compromised	0.619728	Compromised	0.497889	0.0652138	1.72	1.83	2	2.17	A_33_P3385441	Unknown
A_33_P3385671	0.451442	Compromised	-0.451442	Compromised	0	-0.139126	Compromised	0.0973563	Compromised	-0.020885	0.968371	3.51	1.85	2.01	2.17	A_33_P3385671	Unknown
A_33_P3385912	0.335237	Compromised	-0.335236	Compromised	2.4e-07	-0.0790877	Compromised	0.0674567	Compromised	-0.00581551	0.988017	3.23	2	2.09	2.12	A_33_P3385912	Unknown
A_33_P3386147	0.0646276	Compromised	-0.0646276	Compromised	0	0.287417	Compromised	-0.443072	Compromised	-0.0778272	0.853239	4.75	4.28	4.78	2.64	A_33_P3386147	Unknown
A_33_P3386487	-0.0465054	Compromised	0.0465054	Compromised	0	0.358821	Compromised	0.554852	Compromised	0.456837	0.0520332	1.76	1.85	2.01	2.11	A_33_P3386487	Unknown
A_33_P3387016	-0.57622	Compromised	0.57622	Compromised	0	-0.457253	Compromised	0.0607367	Compromised	-0.198258	0.783363	2.36	5.17	2.21	2.9	A_33_P3387016	Unknown
A_33_P3387075	-0.241321	Compromised	0.241321	Compromised	0	-0.593779	Compromised	-0.399408	Compromised	-0.496593	0.196495	3.05	4.2	2.06	2.16	A_33_P3387075	Unknown
A_33_P3387095	0.205713	Compromised	-0.205713	Compromised	0	0.313959	Compromised	-0.95907	Compromised	-0.322556	0.67728	6.1	4.52	5.67	2.15	A_33_P3387095	Unknown
A_33_P3387429	-0.146841	Compromised	0.146841	Compromised	0	0.730438	Compromised	-0.58311	Compromised	0.0736641	0.922832	5	6.04	7.92	2.92	A_33_P3387429	Unknown
A_33_P3387656	-0.0503144	Compromised	0.0503144	Compromised	0	0.304947	Compromised	0.403708	Compromised	0.354328	0.0373809	1.94	2.05	2.14	2.1	A_33_P3387656	Unknown
A_33_P3388527	0.116572	Detected	-0.116572	Detected	0	0.306782	Detected	-0.588715	Detected	-0.140967	0.789392	61.9	51.9	60.9	30	A_33_P3388527	Unknown
A_33_P3388883	-0.162786	Detected	0.162786	Detected	0	0.233613	Detected	-0.287043	Detected	-0.0267149	0.938591	20	24.7	22.7	14.5	A_33_P3388883	Unknown
A_33_P3389028	-0.601394	Compromised	0.601395	Compromised	2.25e-07	0.00329304	Compromised	-0.0974035	Compromised	-0.0470552	0.94495	2.57	5.83	3.37	2.88	A_33_P3389028	Unknown
A_33_P3389578	0.063791	Detected	-0.063791	Detected	0	0.229632	Detected	-0.949035	Detected	-0.359701	0.605687	42.9	38.7	41.5	16.8	A_33_P3389578	Unknown
A_33_P3389668	-0.122093	Compromised	0.122093	Detected	1.2e-07	0.760242	Detected	0.548057	Compromised	0.654149	0.056049	8.43	9.84	13.4	10.6	A_33_P3389668	Unknown
A_33_P3389758	0.406107	Compromised	-0.406107	Compromised	0	1.01467	Compromised	0.385867	Compromised	0.70027	0.305922	7.02	3.94	9.23	5.47	A_33_P3389758	Unknown
A_33_P3390086	0.096143	Detected	-0.096143	Detected	0	-0.170144	Detected	-0.122163	Detected	-0.146153	0.27819	371	320	266	252	A_33_P3390086	Unknown
A_33_P3390097	-0.112983	Compromised	0.112983	Compromised	0	-0.592492	Compromised	-0.978407	Compromised	-0.78545	0.072357	4.98	5.74	3.08	2.16	A_33_P3390097	Unknown
A_33_P3390387	-0.0487061	Compromised	0.0487061	Compromised	0	0.270795	Compromised	0.488521	Compromised	0.379658	0.0861213	1.84	1.94	1.98	2.11	A_33_P3390387	Unknown
A_33_P3390678	0.759536	Compromised	-0.759536	Compromised	0	-0.539278	Compromised	-0.346491	Compromised	-0.442885	0.621413	6.02	2.07	2.11	2.21	A_33_P3390678	Unknown
A_33_P3390753	0.0650721	Compromised	-0.0650725	Compromised	-2.4e-07	0.22764	Compromised	0.433191	Compromised	0.330415	0.113018	2.01	1.81	1.94	2.05	A_33_P3390753	Unknown
A_33_P3390823	-0.0558319	Detected	0.0558319	Detected	0	0.193686	Detected	-1.06406	Detected	-0.435189	0.561863	75.6	80.5	77.5	29.7	A_33_P3390823	Unknown
A_33_P3390939	0.374376	Compromised	-0.374377	Compromised	-2.35e-07	-0.0482073	Compromised	-0.112215	Compromised	-0.0802112	0.850742	8.44	4.95	5.43	4.76	A_33_P3390939	Unknown
A_33_P3391120	0.617212	Detected	-0.617212	Compromised	-1.2e-07	-1.62733	Compromised	-1.19248	Compromised	-1.4099	0.164006	12.2	5.11	2.22	2.75	A_33_P3391120	Unknown
A_33_P3391295	-0.0549979	Compromised	0.0549974	Compromised	-2.38e-07	0.346133	Compromised	0.56431	Compromised	0.455221	0.0650716	1.73	1.84	1.97	2.1	A_33_P3391295	Unknown
A_33_P3391390	-0.0386844	Compromised	0.0386844	Compromised	0	0.224411	Compromised	0.418139	Compromised	0.321275	0.0912095	2.01	2.09	2.08	2.18	A_33_P3391390	Unknown
A_33_P3391496	-0.0527787	Detected	0.0527787	Detected	0	-0.560851	Detected	-0.304938	Detected	-0.432894	0.0888241	31.5	33.4	19.1	20.9	A_33_P3391496	Unknown
A_33_P3391511	-0.326415	Compromised	0.326415	Detected	-1.2e-07	-2.20318	Compromised	-0.0428276	Compromised	-1.12301	0.424501	8.39	13	1.97	8.07	A_33_P3391511	Unknown
A_33_P3391536	0.0125623	Detected	-0.0125623	Detected	0	-0.0882668	Detected	-0.897405	Detected	-0.492836	0.347541	73	70.7	58.7	30.7	A_33_P3391536	Unknown
A_33_P3391970	0.248078	Compromised	-0.248078	Compromised	0	0.18761	Compromised	1.25947	Compromised	0.723539	0.345216	3.12	2.18	2.58	4.97	A_33_P3391970	Unknown
A_33_P3392213	0.00223708	Detected	-0.00223708	Detected	0	-0.289619	Detected	-0.209265	Detected	-0.249442	0.0250494	1140	1120	803	778	A_33_P3392213	Unknown
A_33_P3392350	0.0525782	Detected	-0.0525782	Detected	0	-0.0775239	Detected	-0.0924032	Detected	-0.0849636	0.25073	382	350	301	273	A_33_P3392350	Unknown
A_33_P3393370	-0.0443499	Detected	0.0443499	Detected	0	-0.152571	Detected	-0.751581	Detected	-0.452076	0.273967	125	131	100	60.5	A_33_P3393370	Unknown
A_33_P3393398	0.0125704	Detected	-0.0125709	Detected	-2.385e-07	-0.761374	Detected	-0.532579	Detected	-0.646976	0.0302153	3490	3380	1760	1890	A_33_P3393398	Unknown
A_33_P3393689	-0.0519772	Compromised	0.0519772	Compromised	0	0.316058	Compromised	0.483264	Compromised	0.399661	0.0556555	1.86	1.97	2.07	2.13	A_33_P3393689	Unknown
A_33_P3393702	-0.22435	Compromised	0.22435	Compromised	0	0.902422	Compromised	0.472275	Compromised	0.687349	0.157516	1.71	2.3	3.22	2.19	A_33_P3393702	Unknown
A_33_P3393708	0.456095	Compromised	-0.456095	Compromised	0	-0.159827	Compromised	0.432066	Compromised	0.13612	0.82568	3.59	1.88	2.02	2.79	A_33_P3393708	Unknown
A_33_P3393986	-0.491063	Compromised	0.491063	Compromised	2.4e-07	-0.0488787	Compromised	0.632624	Compromised	0.291873	0.673615	1.69	3.29	1.98	2.91	A_33_P3393986	Unknown
A_33_P3394378	-0.0748227	Detected	0.0748227	Detected	0	0.198756	Detected	-0.04792	Detected	0.0754178	0.653262	23.6	25.8	24.6	19	A_33_P3394378	Unknown
A_33_P3394965	0.29109	Compromised	-0.29109	Compromised	-2.35e-07	-0.006814	Compromised	0.205326	Compromised	0.0992558	0.77906	2.78	1.83	1.95	2.07	A_33_P3394965	Unknown
A_33_P3395206	-0.0485048	Compromised	0.0485053	Compromised	2.38e-07	0.33426	Compromised	0.514691	Compromised	0.424476	0.0535909	1.85	1.95	2.08	2.16	A_33_P3395206	Unknown
A_33_P3395209	-0.058907	Compromised	0.0589075	Compromised	2.39e-07	0.342224	Compromised	0.567254	Compromised	0.454739	0.0699196	1.73	1.85	1.97	2.11	A_33_P3395209	Unknown
A_33_P3395289	0.145661	Compromised	-0.145662	Compromised	-2.4e-07	0.161241	Compromised	0.789294	Compromised	0.475267	0.303437	2.26	1.82	1.97	2.79	A_33_P3395289	Unknown
A_33_P3395310	0.0635843	Detected	-0.0635843	Detected	0	-0.0790467	Detected	-0.368102	Detected	-0.223574	0.292457	29.7	26.8	23.2	17.4	A_33_P3395310	Unknown
A_33_P3395314	0.947025	Compromised	-0.947025	Compromised	0	-0.789145	Compromised	-0.601174	Compromised	-0.695159	0.541089	7.92	2.1	2.05	2.14	A_33_P3395314	Unknown
A_33_P3395472	-0.0263853	Compromised	0.0263853	Compromised	0	0.339325	Compromised	0.521892	Compromised	0.430608	0.0454025	1.8	1.84	2	2.08	A_33_P3395472	Unknown
A_33_P3395478	-0.0510669	Compromised	0.0510664	Compromised	-2.375e-07	0.342722	Compromised	0.595462	Compromised	0.469092	0.0750439	1.73	1.83	1.96	2.14	A_33_P3395478	Unknown
A_33_P3395630	-0.0579243	Compromised	0.0579243	Compromised	0	-1.64527	Compromised	-1.65184	Compromised	-1.64855	0.00123625	9.13	9.75	2.62	2.39	A_33_P3395630	Unknown
A_33_P3395788	-0.0530891	Compromised	0.0530891	Compromised	0	0.340252	Compromised	0.534948	Compromised	0.4376	0.0586175	1.81	1.92	2.05	2.15	A_33_P3395788	Unknown
A_33_P3395843	-0.0570855	Compromised	0.0570855	Compromised	0	0.330104	Compromised	0.518672	Compromised	0.424388	0.0613126	1.8	1.92	2.03	2.12	A_33_P3395843	Unknown
A_33_P3395883	0.0178728	Detected	-0.0178723	Detected	2.38e-07	0.0189018	Detected	-0.131769	Detected	-0.0564337	0.541876	5180	4980	4470	3690	A_33_P3395883	Unknown
A_33_P3396339	0.681801	Compromised	-0.681801	Compromised	0	-0.351652	Compromised	-0.0868411	Compromised	-0.219247	0.782147	4.7	1.8	1.98	2.18	A_33_P3396339	Unknown
A_33_P3396379	-0.0471783	Compromised	0.0471787	Compromised	2.375e-07	0.749924	Compromised	-0.255337	Compromised	0.247293	0.672705	3.07	3.23	4.6	2.1	A_33_P3396379	Unknown
A_33_P3396434	0.0352192	Detected	-0.0352192	Detected	0	0.208054	Detected	0.100547	Detected	0.1543	0.138353	179000	168000	174000	148000	A_33_P3396434	Unknown
A_33_P3396469	0.112222	Detected	-0.112222	Detected	0	-1.0739	Detected	-2.99523	Compromised	-2.03457	0.17011	40.9	34.5	15.5	3.75	A_33_P3396469	Unknown
A_33_P3396477	-0.0442624	Compromised	0.0442619	Compromised	-2.39e-07	0.273067	Compromised	0.50239	Compromised	0.387728	0.0874984	1.88	1.97	2.02	2.17	A_33_P3396477	Unknown
A_33_P3396771	-0.540566	Compromised	0.540566	Compromised	2.35e-07	0.0318894	Compromised	0.115152	Compromised	0.0735207	0.904551	2.94	6.13	3.77	3.66	A_33_P3396771	Unknown
A_33_P3397081	-0.0431395	Compromised	0.0431395	Compromised	0	0.350649	Compromised	0.548423	Compromised	0.449536	0.0530561	1.73	1.81	1.96	2.06	A_33_P3397081	Unknown
A_33_P3397209	0.540203	Compromised	-0.540203	Compromised	0	-0.242715	Compromised	-0.0966477	Compromised	-0.169681	0.785041	4.27	1.99	2.14	2.17	A_33_P3397209	Unknown
A_33_P3397433	-0.164037	Detected	0.164037	Detected	0	-0.246723	Detected	-0.926829	Detected	-0.586776	0.260376	35	43.3	28.5	16.3	A_33_P3397433	Unknown
A_33_P3397473	-0.695812	Compromised	0.695812	Compromised	2.25e-07	-0.434799	Compromised	-0.237477	Compromised	-0.336138	0.679616	2.1	5.43	2.17	2.28	A_33_P3397473	Unknown
A_33_P3397506	0.0805709	Detected	-0.0805709	Detected	0	-0.693548	Detected	-0.351768	Detected	-0.522658	0.109602	118	104	59.5	69.1	A_33_P3397506	Unknown
A_33_P3397573	-0.0497246	Compromised	0.0497246	Compromised	0	0.329833	Compromised	0.436098	Compromised	0.382966	0.0342625	1.97	2.08	2.21	2.18	A_33_P3397573	Unknown
A_33_P3397593	-0.0140753	Compromised	0.0140758	Compromised	2.385e-07	1.25539	Compromised	0.47406	Compromised	0.864727	0.157472	2.03	2.04	4.22	2.25	A_33_P3397593	Unknown
A_33_P3397608	0.21058	Compromised	-0.21058	Compromised	0	0.116714	Compromised	0.339374	Compromised	0.228044	0.43941	2.5	1.84	2.02	2.16	A_33_P3397608	Unknown
A_33_P3398187	0.488423	Compromised	-0.488423	Compromised	2.4e-07	0.984576	Compromised	0.0862541	Compromised	0.535415	0.504431	6.89	3.45	8.38	4.12	A_33_P3398187	Unknown
A_33_P3399181	-0.00342393	Detected	0.00342393	Detected	0	-0.0191987	Detected	0.0732324	Detected	0.0270169	0.618879	2040	2020	1740	1700	A_33_P3399181	Unknown
A_33_P3399713	-0.213784	Compromised	0.213784	Compromised	0	0.332699	Compromised	0.697194	Compromised	0.514946	0.208248	2.12	2.81	2.67	3.15	A_33_P3399713	Unknown
A_33_P3399778	0.22669	Detected	-0.22669	Detected	0	-0.73736	Compromised	-1.16753	Compromised	-0.952443	0.0928892	15.7	11.3	6.94	4.72	A_33_P3399778	Unknown
A_33_P3399911	-0.621342	Compromised	0.621342	Detected	-1.3e-07	0.802399	Detected	0.15807	Compromised	0.480235	0.563484	5.36	12.5	12.4	7.27	A_33_P3399911	Unknown
A_33_P3400023	-0.057085	Compromised	0.0570855	Compromised	2.385e-07	0.626107	Compromised	0.396374	Compromised	0.51124	0.0575681	1.95	2.08	2.7	2.11	A_33_P3400023	Unknown
A_33_P3400292	0.0865788	Detected	-0.0865788	Detected	0	0.124844	Detected	-0.340368	Detected	-0.107762	0.706509	26.2	22.9	23.2	15.4	A_33_P3400292	Unknown
A_33_P3401068	-0.0347505	Compromised	0.0347509	Compromised	2.4e-07	0.220575	Compromised	0.393644	Compromised	0.30711	0.0811356	2.05	2.12	2.11	2.18	A_33_P3401068	Unknown
A_33_P3401084	-0.0336158	Detected	0.0336158	Detected	0	0.168314	Detected	0.407954	Detected	0.288134	0.146602	1230	1270	1220	1320	A_33_P3401084	Unknown
A_33_P3401138	-0.0962512	Detected	0.0962512	Detected	0	0.126529	Detected	-0.371413	Detected	-0.122442	0.691469	31.7	35.7	31.9	20.7	A_33_P3401138	Unknown
A_33_P3401146	-0.0581093	Compromised	0.0581093	Compromised	0	0.340022	Compromised	0.543248	Compromised	0.441635	0.0636205	1.76	1.88	2	2.11	A_33_P3401146	Unknown
A_33_P3401179	-0.0501752	Compromised	0.0501752	Compromised	0	0.655928	Compromised	0.50841	Compromised	0.582169	0.0226844	1.77	1.87	2.49	2.06	A_33_P3401179	Unknown
A_33_P3401394	0.317145	Detected	-0.317145	Detected	1.25e-07	0.703319	Detected	-0.631145	Compromised	0.0360869	0.96548	18.9	12	21.3	7.74	A_33_P3401394	Unknown
A_33_P3401661	0.386827	Compromised	-0.386827	Compromised	0	0.0561419	Compromised	-0.893893	Compromised	-0.418875	0.564712	8.24	4.75	5.65	2.68	A_33_P3401661	Unknown
A_33_P3402071	-0.110879	Detected	0.110879	Detected	0	-0.319405	Detected	-0.366958	Detected	-0.343182	0.0940399	20.1	23.1	15	13.3	A_33_P3402071	Unknown
A_33_P3402086	-0.236825	Compromised	0.236825	Detected	1.2e-07	-0.532055	Compromised	-1.66742	Compromised	-1.09974	0.215697	7.3	9.99	5.13	2.14	A_33_P3402086	Unknown
A_33_P3402294	-0.568387	Detected	0.568387	Detected	0	0.0588319	Detected	-0.148609	Compromised	-0.0448885	0.945146	9.46	20.5	12.6	10	A_33_P3402294	Unknown
A_33_P3402495	0.382767	Detected	-0.382767	Detected	0	-0.235926	Detected	-1.19427	Compromised	-0.715096	0.363848	27.6	16	15.5	7.31	A_33_P3402495	Unknown
A_33_P3402600	0.0549393	Detected	-0.0549388	Detected	2.385e-07	-0.466716	Detected	-0.395181	Detected	-0.430948	0.0223673	8990	8210	5400	5200	A_33_P3402600	Unknown
A_33_P3402773	-0.0709806	Detected	0.0709806	Detected	0	0.586482	Detected	0.0572057	Detected	0.321844	0.361057	28.6	31.1	38.9	24.7	A_33_P3402773	Unknown
A_33_P3403169	-0.0386844	Compromised	0.0386844	Compromised	0	0.217458	Compromised	0.411505	Compromised	0.314481	0.0948768	2.01	2.09	2.07	2.17	A_33_P3403169	Unknown
A_33_P3403242	-0.0510669	Compromised	0.0510664	Compromised	-2.375e-07	0.327925	Compromised	0.533475	Compromised	0.4307	0.0642341	1.73	1.83	1.94	2.05	A_33_P3403242	Unknown
A_33_P3403356	-0.0228622	Detected	0.0228622	Detected	0	-0.309584	Detected	-0.780931	Detected	-0.545258	0.147863	1160	1180	820	542	A_33_P3403356	Unknown
A_33_P3403957	-0.0513372	Compromised	0.0513377	Compromised	2.39e-07	0.314373	Compromised	0.46082	Compromised	0.387596	0.0493276	1.89	2	2.1	2.13	A_33_P3403957	Unknown
A_33_P3404047	-0.041714	Detected	0.041714	Detected	0	0.0257728	Detected	-0.219082	Detected	-0.0966544	0.532798	74.7	78	67.5	52.2	A_33_P3404047	Unknown
A_33_P3404116	-0.555832	Compromised	0.555832	Compromised	0	-0.453156	Compromised	1.11289	Compromised	0.329868	0.763956	3.24	6.9	3	8.14	A_33_P3404116	Unknown
A_33_P3404221	-0.359384	Compromised	0.359384	Detected	0	0.166536	Detected	0.380747	Detected	0.273641	0.541463	8.94	14.5	11.1	11.8	A_33_P3404221	Unknown
A_33_P3404241	-0.0409079	Compromised	0.0409074	Compromised	-2.385e-07	0.306066	Compromised	0.540983	Compromised	0.423524	0.0764818	1.86	1.94	2.04	2.2	A_33_P3404241	Unknown
A_33_P3404346	-0.0139575	Compromised	0.0139575	Compromised	0	0.247055	Compromised	0.786413	Compromised	0.516734	0.195794	2.1	2.11	2.17	2.89	A_33_P3404346	Unknown
A_33_P3404566	0.292227	Detected	-0.292227	Compromised	0	0.246691	Detected	-2.06142	Compromised	-0.907365	0.52557	15.2	9.99	12.7	2.35	A_33_P3404566	Unknown
A_33_P3404759	-0.438607	Compromised	0.438607	Compromised	1.2e-07	-0.532181	Compromised	-1.30763	Compromised	-0.919908	0.256698	4.9	8.87	3.96	2.12	A_33_P3404759	Unknown
A_33_P3405043	-0.174766	Detected	0.174766	Detected	0	-0.398123	Detected	-0.0656891	Detected	-0.231906	0.437749	17.6	22.1	13	15	A_33_P3405043	Unknown
A_33_P3405504	-0.995128	Compromised	0.995128	Detected	0	-1.81847	Compromised	-1.62329	Compromised	-1.72088	0.227383	7.1	27.8	3.46	3.63	A_33_P3405504	Unknown
A_33_P3405571	-0.0261283	Compromised	0.0261278	Compromised	-2.385e-07	0.293931	Compromised	1.50177	Compromised	0.897848	0.275771	1.83	1.87	1.97	4.17	A_33_P3405571	Unknown
A_33_P3405864	-0.0409079	Compromised	0.0409074	Compromised	-2.385e-07	0.306066	Compromised	0.540983	Compromised	0.423524	0.0764818	1.86	1.94	2.04	2.2	A_33_P3405864	Unknown
A_33_P3405870	-0.0437441	Compromised	0.0437446	Compromised	2.385e-07	0.438024	Compromised	0.446437	Compromised	0.442231	0.00973124	1.91	2	2.3	2.12	A_33_P3405870	Unknown
A_33_P3406090	-0.0163715	Detected	0.0163715	Detected	0	-0.51636	Detected	-0.546661	Detected	-0.531511	0.00175663	123	124	75	67.3	A_33_P3406090	Unknown
A_33_P3406110	-0.704396	Compromised	0.704396	Compromised	2.25e-07	-0.760955	Compromised	-0.496809	Compromised	-0.628882	0.47276	2.4	6.28	1.99	2.19	A_33_P3406110	Unknown
A_33_P3406255	-0.0584104	Detected	0.0584104	Detected	0	-0.0495231	Detected	-1.05665	Detected	-0.553086	0.389174	204	218	177	80.7	A_33_P3406255	Unknown
A_33_P3406265	0.287048	Compromised	-0.287048	Compromised	0	0.00205994	Compromised	0.251779	Compromised	0.126919	0.724402	2.84	1.88	2.01	2.19	A_33_P3406265	Unknown
A_33_P3406405	0.264853	Compromised	-0.264853	Compromised	-2.4e-07	0.00374126	Compromised	0.59921	Compromised	0.301476	0.528295	2.71	1.85	1.95	2.7	A_33_P3406405	Unknown
A_33_P3406413	-0.283029	Compromised	0.283029	Compromised	0	0.0370302	Compromised	0.43578	Compromised	0.236405	0.565184	1.83	2.67	1.97	2.38	A_33_P3406413	Unknown
A_33_P3406547	-0.0465054	Compromised	0.0465054	Compromised	0	0.373106	Compromised	1.13296	Compromised	0.753033	0.188019	1.76	1.85	2.03	3.15	A_33_P3406547	Unknown
A_33_P3406702	-0.033433	Detected	0.0334325	Detected	-2.38e-07	-0.0297613	Detected	0.190005	Detected	0.080122	0.557624	15500	16000	13400	14300	A_33_P3406702	Unknown
A_33_P3406811	-0.0467873	Compromised	0.0467868	Compromised	-2.385e-07	0.328558	Compromised	0.454541	Compromised	0.39155	0.037892	1.94	2.04	2.17	2.17	A_33_P3406811	Unknown
A_33_P3407049	-0.0152714	Detected	0.0152714	Detected	0	0.251356	Detected	-0.0255234	Detected	0.112916	0.502661	45.5	45.8	47.2	35.7	A_33_P3407049	Unknown
A_33_P3407230	-0.184954	Detected	0.184954	Detected	0	-0.76092	Detected	-0.476239	Detected	-0.618579	0.117735	22.3	28.4	12.9	14.4	A_33_P3407230	Unknown
A_33_P3407235	0.401616	Compromised	-0.401616	Compromised	0	0.311746	Compromised	-0.0638776	Compromised	0.123934	0.806092	6.64	3.75	5.38	3.8	A_33_P3407235	Unknown
A_33_P3407374	0.0797548	Detected	-0.0797548	Detected	0	0.154711	Detected	-0.00728607	Detected	0.0737123	0.583198	57800	51000	52500	43000	A_33_P3407374	Unknown
A_33_P3407564	-0.033802	Detected	0.033802	Detected	0	-0.150919	Detected	0.00450802	Detected	-0.0732057	0.478736	244	252	194	198	A_33_P3407564	Unknown
A_33_P3407623	0.113246	Compromised	-0.113246	Compromised	-2.38e-07	0.0506878	Compromised	0.254292	Compromised	0.15249	0.422112	2.41	2.03	1.99	2.1	A_33_P3407623	Unknown
A_33_P3407626	-0.0410686	Detected	0.0410686	Detected	0	0.277882	Detected	-0.885803	Compromised	-0.30396	0.654244	18.5	19.3	19.9	8.14	A_33_P3407626	Unknown
A_33_P3407691	0.227259	Detected	-0.227259	Detected	0	-0.250608	Compromised	0.464587	Detected	0.10699	0.824227	14.6	10.5	9.04	13.6	A_33_P3407691	Unknown
A_33_P3407826	0.0608566	Detected	-0.0608566	Detected	0	0.0974958	Detected	-0.154042	Detected	-0.0282731	0.858355	329	298	291	224	A_33_P3407826	Unknown
A_33_P3407941	-0.784709	Compromised	0.784709	Compromised	2.5e-07	0.693211	Compromised	-0.954213	Compromised	-0.130501	0.919153	3.06	8.95	7.35	2.15	A_33_P3407941	Unknown
A_33_P3407999	0.419481	Compromised	-0.419481	Compromised	0	-0.816748	Compromised	0.420129	Compromised	-0.198309	0.815571	5.3	2.92	1.94	4.19	A_33_P3407999	Unknown
A_33_P3408047	-1.29611	Compromised	1.29611	Detected	-2.5e-07	-0.904257	Compromised	-0.288689	Compromised	-0.596473	0.698159	1.75	10.4	1.98	2.78	A_33_P3408047	Unknown
A_33_P3408162	-0.0510669	Compromised	0.0510664	Compromised	-2.375e-07	0.350064	Compromised	0.608883	Compromised	0.479473	0.0748582	1.73	1.83	1.97	2.16	A_33_P3408162	Unknown
A_33_P3408222	0.356357	Compromised	-0.356356	Compromised	2.4e-07	1.15022	Compromised	0.445421	Compromised	0.797823	0.252402	3.01	1.81	4.5	2.53	A_33_P3408222	Unknown
A_33_P3408227	0.126667	Compromised	-0.126666	Compromised	2.4e-07	-0.287658	Compromised	0.724669	Compromised	0.218506	0.716068	3.06	2.53	1.98	3.66	A_33_P3408227	Unknown
A_33_P3408529	0.163505	Compromised	-0.163505	Compromised	0	-1.65389	Compromised	0.157184	Compromised	-0.748351	0.501485	8.91	7	2.18	7.01	A_33_P3408529	Unknown
A_33_P3408643	-0.689125	Compromised	0.689126	Compromised	2.4e-07	-0.438706	Compromised	-0.228249	Compromised	-0.333477	0.679577	1.94	4.97	1.99	2.11	A_33_P3408643	Unknown
A_33_P3408665	0.0035677	Detected	-0.00356722	Detected	2.384e-07	0.0738649	Detected	-0.151505	Detected	-0.0388203	0.763432	4650	4560	4210	3300	A_33_P3408665	Unknown
A_33_P3408678	0.819385	Compromised	-0.819385	Compromised	0	-0.597295	Compromised	-0.325881	Compromised	-0.461588	0.634245	6.13	1.94	1.98	2.19	A_33_P3408678	Unknown
A_33_P3408683	-0.0696621	Compromised	0.0696626	Compromised	2.38e-07	0.352911	Compromised	0.421306	Compromised	0.387108	0.0379173	1.99	2.16	2.3	2.21	A_33_P3408683	Unknown
A_33_P3408877	0.0353997	Detected	-0.0353997	Detected	0	0.155581	Detected	-0.718436	Detected	-0.281428	0.586699	92.4	86.7	86.6	43.3	A_33_P3408877	Unknown
A_33_P3409249	0.0425844	Detected	-0.0425844	Detected	0	-0.5444	Detected	-0.635647	Detected	-0.590024	0.011004	32.4	30.1	18.6	16	A_33_P3409249	Unknown
A_33_P3409282	-0.155284	Detected	0.155284	Detected	0	0.086437	Detected	-0.358736	Detected	-0.136149	0.665686	30.6	37.4	31.2	21	A_33_P3409282	Unknown
A_33_P3409289	0.0766671	Detected	-0.0766671	Detected	0	-0.110449	Detected	-0.478088	Detected	-0.294269	0.277591	60.6	53.7	45.9	32.6	A_33_P3409289	Unknown
A_33_P3409544	-0.0575919	Compromised	0.0575914	Compromised	-2.375e-07	0.345717	Compromised	0.541075	Compromised	0.443396	0.0596131	1.78	1.9	2.03	2.13	A_33_P3409544	Unknown
A_33_P3409631	-0.00882721	Compromised	0.00882721	Compromised	0	0.271375	Compromised	-0.622271	Compromised	-0.175448	0.732519	4.24	4.23	4.44	2.19	A_33_P3409631	Unknown
A_33_P3409815	-0.0357506	Detected	0.0357506	Detected	0	-0.456475	Detected	-0.756757	Detected	-0.606616	0.0590562	53.4	55.3	34.4	25.6	A_33_P3409815	Unknown
A_33_P3410053	-0.0343137	Compromised	0.0343132	Compromised	-2.39e-07	0.302908	Compromised	0.508061	Compromised	0.405485	0.0643628	1.79	1.85	1.95	2.06	A_33_P3410053	Unknown
A_33_P3410166	0.648945	Compromised	-0.648944	Compromised	2.25e-07	0.256671	Compromised	0.322437	Compromised	0.289554	0.699466	4.84	1.94	3.18	3.05	A_33_P3410166	Unknown
A_33_P3410269	-0.0318527	Compromised	0.0318527	Compromised	0	0.174623	Compromised	0.378227	Compromised	0.276425	0.122205	2	2.06	1.99	2.1	A_33_P3410269	Unknown
A_33_P3410821	-0.0591011	Compromised	0.0591016	Compromised	2.375e-07	0.323733	Compromised	0.468741	Compromised	0.396237	0.0514655	2.01	2.15	2.26	2.29	A_33_P3410821	Unknown
A_33_P3411122	0.194407	Detected	-0.194407	Compromised	1.15e-07	0.701845	Detected	0.736406	Compromised	0.719126	0.0664069	9.3	7	11.4	10.7	A_33_P3411122	Unknown
A_33_P3411384	0.016355	Detected	-0.016355	Detected	0	-0.328748	Detected	-0.792053	Detected	-0.560401	0.137242	246	237	167	111	A_33_P3411384	Unknown
A_33_P3411890	-0.181425	Detected	0.181425	Detected	0	-0.25089	Detected	-0.36381	Detected	-0.30735	0.247156	30.3	38.4	24.9	21.1	A_33_P3411890	Unknown
A_33_P3412317	-0.621239	Compromised	0.621238	Compromised	-2.35e-07	0.865723	Compromised	-0.144667	Compromised	0.360528	0.696628	2.11	4.92	5.1	2.32	A_33_P3412317	Unknown
A_33_P3412438	0.066437	Detected	-0.066437	Detected	0	-0.468456	Detected	-1.43909	Detected	-0.953774	0.190897	83	74.6	49.4	23.1	A_33_P3412438	Unknown
A_33_P3412687	0.087245	Detected	-0.087245	Detected	0	-0.107329	Detected	-0.503644	Detected	-0.305486	0.293714	142	124	107	74.5	A_33_P3412687	Unknown
A_33_P3412695	0.0893397	Detected	-0.0893397	Detected	0	-0.372114	Detected	-0.585617	Detected	-0.478866	0.0751063	49.5	43.1	31	24.5	A_33_P3412695	Unknown
A_33_P3412795	-0.162227	Compromised	0.162227	Compromised	0	1.03992	Compromised	0.371068	Compromised	0.705495	0.198116	1.88	2.32	3.73	2.15	A_33_P3412795	Unknown
A_33_P3413104	0.174888	Detected	-0.174888	Detected	-1.15e-07	0.0301406	Detected	0.362575	Detected	0.196358	0.501225	15	11.6	11.7	13.5	A_33_P3413104	Unknown
A_33_P3413384	0.168263	Detected	-0.168263	Detected	-1.2e-07	0.415393	Detected	0.13731	Compromised	0.276351	0.332998	12.8	9.99	13.1	9.9	A_33_P3413384	Unknown
A_33_P3413514	0.154187	Detected	-0.154187	Detected	0	-0.199701	Detected	-0.323496	Detected	-0.261599	0.25604	28.9	23	19.5	16.4	A_33_P3413514	Unknown
A_33_P3413518	0.474394	Compromised	-0.474395	Compromised	-2.4e-07	0.810043	Compromised	0.248702	Compromised	0.529373	0.438199	8.05	4.11	8.76	5.44	A_33_P3413518	Unknown
A_33_P3413945	-0.00672388	Compromised	0.00672388	Compromised	0	0.288179	Compromised	0.511303	Compromised	0.399741	0.0700567	1.9	1.89	2.01	2.15	A_33_P3413945	Unknown
A_33_P3413997	-0.298971	Detected	0.298971	Detected	0	-0.359626	Detected	-0.512359	Detected	-0.435993	0.29321	17.9	26.7	14.8	12.2	A_33_P3413997	Unknown
A_33_P3414017	0.344396	Detected	-0.344396	Detected	0	-0.147918	Detected	-1.02577	Detected	-0.586843	0.4032	615	376	377	188	A_33_P3414017	Unknown
A_33_P3414228	-0.0768819	Detected	0.0768819	Detected	0	0.0681124	Detected	-0.284311	Detected	-0.108099	0.630542	30.1	33	28.7	20.6	A_33_P3414228	Unknown
A_33_P3414472	-0.535473	Compromised	0.535473	Detected	0	0.547547	Detected	0.26914	Compromised	0.408343	0.537335	7.39	15.3	13.5	10.2	A_33_P3414472	Unknown
A_33_P3414494	0.0310969	Compromised	-0.0310974	Compromised	-2.385e-07	0.182817	Compromised	0.397504	Compromised	0.290161	0.121824	2.14	2.02	2.05	2.18	A_33_P3414494	Unknown
A_33_P3415047	-0.0485048	Compromised	0.0485053	Compromised	2.38e-07	0.348066	Compromised	0.527988	Compromised	0.438027	0.0503649	1.85	1.95	2.1	2.18	A_33_P3415047	Unknown
A_33_P3415166	-0.17677	Compromised	0.176769	Compromised	-2.35e-07	-0.892043	Compromised	-0.817361	Compromised	-0.854702	0.0418952	4.36	5.49	2.29	2.21	A_33_P3415166	Unknown
A_33_P3415617	-0.0524151	Detected	0.0524151	Detected	0	-0.212523	Detected	0.0946295	Detected	-0.0589466	0.751217	184	195	142	161	A_33_P3415617	Unknown
A_33_P3415826	0.329402	Compromised	-0.329402	Compromised	0	-0.165756	Compromised	0.0455341	Compromised	-0.060111	0.878045	3.22	2.01	1.97	2.09	A_33_P3415826	Unknown
A_33_P3415992	0.0144897	Compromised	-0.0144897	Compromised	0	-0.179573	Compromised	0.0845728	Compromised	-0.0475001	0.754915	2.64	2.55	1.99	2.19	A_33_P3415992	Unknown
A_33_P3416196	-0.240951	Compromised	0.240951	Compromised	1.2e-07	-1.71555	Compromised	0.191017	Compromised	-0.762265	0.519308	6.51	8.96	2.02	6.94	A_33_P3416196	Unknown
A_33_P3416644	-1.10902	Compromised	1.10902	Detected	1e-07	-1.05503	Compromised	-0.833742	Compromised	-0.944387	0.486031	2.29	10.5	2.05	2.19	A_33_P3416644	Unknown
A_33_P3416649	-0.0182872	Compromised	0.0182872	Compromised	0	0.892857	Compromised	0.558206	Compromised	0.725531	0.0498341	1.85	1.87	3	2.18	A_33_P3416649	Unknown
A_33_P3416707	-0.101914	Detected	0.101914	Detected	0	0.18455	Detected	-0.525686	Detected	-0.170568	0.689663	34.8	39.5	36.6	20.5	A_33_P3416707	Unknown
A_33_P3416807	-0.0286107	Compromised	0.0286102	Compromised	-2.38e-07	0.185096	Compromised	0.396387	Compromised	0.290741	0.1173	1.97	2.02	1.97	2.09	A_33_P3416807	Unknown
A_33_P3417123	0.00340891	Detected	-0.00340891	Detected	0	-0.0226378	Detected	-0.245319	Detected	-0.133978	0.35214	209	205	177	139	A_33_P3417123	Unknown
A_33_P3417464	0.100915	Compromised	-0.100915	Compromised	-2.375e-07	-0.797368	Compromised	-0.114732	Compromised	-0.45605	0.328572	4.82	4.13	2.23	3.28	A_33_P3417464	Unknown
A_33_P3417547	-0.286099	Detected	0.286099	Detected	0	0.499654	Detected	0.150552	Detected	0.325103	0.434354	18.7	27.4	27.8	20	A_33_P3417547	Unknown
A_33_P3417553	-0.0473213	Compromised	0.0473208	Compromised	-2.385e-07	0.340034	Compromised	0.545584	Compromised	0.442809	0.0595205	1.72	1.81	1.94	2.05	A_33_P3417553	Unknown
A_33_P3418165	-0.0446167	Compromised	0.0446162	Compromised	-2.39e-07	0.344177	Compromised	0.524099	Compromised	0.434138	0.0495575	1.86	1.95	2.1	2.18	A_33_P3418165	Unknown
A_33_P3418321	0.168482	Detected	-0.168483	Compromised	-2.4e-07	-0.166817	Compromised	-0.102041	Compromised	-0.134429	0.51537	9.51	7.42	6.5	6.23	A_33_P3418321	Unknown
A_33_P3418380	0.208654	Compromised	-0.208654	Compromised	2.35e-07	1.72252	Compromised	1.41508	Compromised	1.5688	0.0262225	3.74	2.76	9.21	6.82	A_33_P3418380	Unknown
A_33_P3418448	-0.000671387	Detected	0.000671387	Detected	0	-0.729377	Detected	-1.0076	Compromised	-0.868489	0.0247101	22.1	21.8	11.5	8.69	A_33_P3418448	Unknown
A_33_P3418466	0.0385594	Detected	-0.0385594	Detected	0	-0.100844	Detected	-0.23741	Detected	-0.169127	0.163749	152	142	119	99.2	A_33_P3418466	Unknown
A_33_P3418496	-1.65977	Compromised	1.65977	Detected	0	-0.951794	Compromised	-1.08445	Compromised	-1.01812	0.602339	1.86	18.3	2.62	2.19	A_33_P3418496	Unknown
A_33_P3418571	-0.0461116	Compromised	0.0461111	Compromised	-2.385e-07	0.335718	Compromised	0.538944	Compromised	0.437331	0.0593646	1.78	1.87	2	2.11	A_33_P3418571	Unknown
A_33_P3419204	0.636089	Compromised	-0.636089	Compromised	2.25e-07	-0.3494	Compromised	-0.148366	Compromised	-0.248883	0.736387	4.73	1.93	2.06	2.17	A_33_P3419204	Unknown
A_33_P3419735	-0.0700085	Detected	0.0700085	Detected	0	-0.270683	Detected	-0.29962	Detected	-0.285152	0.0574852	73.3	79.6	55	49.4	A_33_P3419735	Unknown
A_33_P3419875	-0.982418	Compromised	0.982418	Compromised	1e-07	-0.946107	Compromised	-0.195269	Compromised	-0.570688	0.641767	2.42	9.31	2.14	3.3	A_33_P3419875	Unknown
A_33_P3420013	0.400873	Detected	-0.400873	Detected	-1.25e-07	-0.352999	Compromised	-0.280909	Compromised	-0.316954	0.513504	17.6	9.95	9	8.67	A_33_P3420013	Unknown
A_33_P3420347	-0.038548	Compromised	0.0385475	Compromised	-2.385e-07	0.399591	Compromised	0.69278	Compromised	0.546185	0.0691273	2.02	2.1	2.36	2.65	A_33_P3420347	Unknown
A_33_P3420695	0.041764	Detected	-0.041764	Detected	0	-0.264879	Detected	-0.805725	Detected	-0.535302	0.189582	143	133	99.7	62.8	A_33_P3420695	Unknown
A_33_P3420810	-0.0668378	Compromised	0.0668378	Compromised	0	-0.453043	Compromised	-1.60596	Compromised	-1.0295	0.218056	7.76	8.39	5.12	2.11	A_33_P3420810	Unknown
A_33_P3421007	-0.00676394	Compromised	0.00676394	Compromised	0	0.273032	Compromised	1.02409	Compromised	0.64856	0.226348	1.92	1.91	2.01	3.1	A_33_P3421007	Unknown
A_33_P3421144	-0.0597324	Compromised	0.0597324	Compromised	0	0.366635	Compromised	0.625454	Compromised	0.496045	0.0735657	1.7	1.82	1.97	2.16	A_33_P3421144	Unknown
A_33_P3421438	0.00252104	Compromised	-0.00252104	Compromised	0	-0.387763	Compromised	-0.716682	Compromised	-0.552223	0.0784201	7.25	7.12	4.77	3.48	A_33_P3421438	Unknown
A_33_P3421515	0.0941486	Detected	-0.0941482	Detected	2.38e-07	-0.308413	Detected	-0.141337	Detected	-0.224875	0.215914	9550	8260	6230	6410	A_33_P3421515	Unknown
A_33_P3421674	1.12586	Detected	-1.12586	Compromised	-1e-07	-0.436002	Compromised	-0.152646	Compromised	-0.294324	0.819603	10.1	2.09	2.95	3.29	A_33_P3421674	Unknown
A_33_P3421808	-0.0351043	Compromised	0.0351047	Compromised	2.375e-07	0.178603	Compromised	0.374295	Compromised	0.276449	0.11708	2.02	2.09	2.02	2.12	A_33_P3421808	Unknown
A_33_P3422294	0.0710516	Detected	-0.0710521	Detected	-2.37e-07	-0.0518379	Detected	-0.222987	Detected	-0.137413	0.342102	3460	3090	2740	2230	A_33_P3422294	Unknown
A_33_P3422712	-0.0436475	Detected	0.0436475	Detected	0	-0.241754	Detected	-0.264914	Detected	-0.253334	0.0303356	1490	1560	1120	1010	A_33_P3422712	Unknown
A_33_P3423017	-0.372768	Compromised	0.372768	Detected	0	0.474811	Detected	0.285529	Compromised	0.38017	0.427103	6.96	11.5	10.8	8.68	A_33_P3423017	Unknown
A_33_P3423202	-0.143436	Detected	0.143436	Detected	0	-0.60947	Compromised	-2.26109	Compromised	-1.43528	0.228957	17.3	20.8	10.8	3.15	A_33_P3423202	Unknown
A_33_P3423210	-0.0530891	Compromised	0.0530891	Compromised	0	0.340252	Compromised	0.534948	Compromised	0.4376	0.0586175	1.81	1.92	2.05	2.15	A_33_P3423210	Unknown
A_33_P3423315	-0.122967	Compromised	0.122967	Compromised	0	0.523055	Compromised	0.644738	Compromised	0.583897	0.0510205	2.49	2.91	3.36	3.35	A_33_P3423315	Unknown
A_33_P3423565	-0.409336	Compromised	0.409336	Compromised	-2.5e-07	-0.143702	Compromised	0.0602841	Compromised	-0.0417087	0.930258	1.91	3.32	1.98	2.09	A_33_P3423565	Unknown
A_33_P3423845	0.0910766	Detected	-0.0910766	Detected	0	0.0771167	Detected	-0.67858	Detected	-0.300732	0.520022	137	119	117	63.5	A_33_P3423845	Unknown
A_33_P3424108	0.29866	Detected	-0.29866	Compromised	0	-1.43209	Compromised	-0.840083	Compromised	-1.13609	0.114032	10.7	6.97	2.78	3.84	A_33_P3424108	Unknown
A_33_P3424347	0.0544457	Detected	-0.0544457	Detected	0	-0.51477	Detected	-0.0180473	Detected	-0.266409	0.404692	101	92.3	58.7	75.9	A_33_P3424347	Unknown
A_33_P3424826	-0.148767	Compromised	0.148767	Compromised	-2.35e-07	-1.21986	Compromised	-0.355971	Compromised	-0.787916	0.226726	7.48	9.06	3.07	5.12	A_33_P3424826	Unknown
A_33_P3424856	-0.0320654	Compromised	0.0320649	Compromised	-2.375e-07	0.181642	Compromised	0.466171	Compromised	0.323906	0.156477	1.98	2.04	1.98	2.21	A_33_P3424856	Unknown
A_33_P3438201	-0.191385	Detected	0.191385	Detected	0	-0.278432	Detected	0.0437748	Detected	-0.117328	0.685222	18.6	23.9	15.1	17.3	A_33_P3438201	Unknown
A_33_P3444555	0.136067	Detected	-0.136067	Detected	0	-0.406668	Detected	-0.602614	Compromised	-0.504641	0.0949342	17.4	14.2	10.3	8.24	A_33_P3444555	Unknown
A_33_P3465440	0.237885	Compromised	-0.237885	Compromised	2.4e-07	0.177153	Compromised	0.363678	Compromised	0.270416	0.400848	2.54	1.8	2.1	2.19	A_33_P3465440	Unknown
A_33_P3479066	-0.312211	Detected	0.312211	Detected	1.2e-07	0.20985	Detected	-0.0151794	Compromised	0.0973352	0.796929	9.61	14.6	11.9	9.33	A_33_P3479066	Unknown
A_33_P3484775	-0.0505152	Compromised	0.0505147	Compromised	-2.385e-07	0.312202	Compromised	0.438185	Compromised	0.375194	0.0433267	1.93	2.04	2.14	2.14	A_33_P3484775	Unknown
A_33_P3486059	-0.0311422	Compromised	0.0311422	Compromised	0	0.210177	Compromised	0.383245	Compromised	0.296711	0.0841268	2.07	2.13	2.11	2.18	A_33_P3486059	Unknown
A_33_P3503279	-0.178391	Detected	0.178391	Detected	0	-1.40472	Compromised	-3.17328	Compromised	-2.289	0.126506	22.9	28.9	8.44	2.27	A_33_P3503279	Unknown
A_33_P3509019	-0.1723	Compromised	0.1723	Compromised	0	0.244092	Compromised	0.451758	Compromised	0.347925	0.225857	1.79	2.24	2.06	2.18	A_33_P3509019	Unknown
A_33_P3510508	0.440546	Compromised	-0.440546	Compromised	0	-0.14889	Compromised	0.476125	Compromised	0.163618	0.790553	3.42	1.83	1.96	2.77	A_33_P3510508	Unknown
A_33_P3519223	-0.0656221	Detected	0.0656221	Detected	0	-0.391235	Compromised	-0.888149	Compromised	-0.639692	0.130519	12.6	13.6	8.67	5.63	A_33_P3519223	Unknown
A_33_P3521965	-0.0552483	Compromised	0.0552483	Compromised	0	0.36155	Compromised	0.632964	Compromised	0.497257	0.0769383	1.72	1.83	1.98	2.19	A_33_P3521965	Unknown
A_33_P3538688	-0.0575523	Compromised	0.0575523	Compromised	0	0.311891	Compromised	0.403926	Compromised	0.357908	0.0398707	1.93	2.06	2.15	2.1	A_33_P3538688	Unknown
A_33_P3615955	-0.895224	Compromised	0.895224	Detected	1.15e-07	-0.121755	Compromised	-1.04753	Compromised	-0.584644	0.620488	3.08	10.5	4.54	2.19	A_33_P3615955	Unknown
A_33_P3642217	-0.503353	Compromised	0.503353	Detected	1.3e-07	0.162756	Compromised	0.693826	Compromised	0.428291	0.530223	5.05	10	6.91	9.15	A_33_P3642217	Unknown
A_33_P3673310	0.329265	Detected	-0.329265	Compromised	0	-0.609031	Compromised	-0.797613	Compromised	-0.703322	0.176414	15.2	9.49	6.84	5.5	A_33_P3673310	Unknown
A_33_P3673544	-0.03968	Compromised	0.03968	Compromised	0	0.302034	Compromised	1.81123	Compromised	1.05663	0.296899	1.94	2.02	2.12	5.53	A_33_P3673544	Unknown
A_33_P3701139	-0.0983946	Detected	0.0983946	Detected	0	-0.102105	Detected	0.18022	Detected	0.0390575	0.841526	1930	2180	1660	1850	A_33_P3701139	Unknown
A_33_P3723827	-0.603417	Compromised	0.603418	Compromised	2.5e-07	-0.178206	Compromised	0.0866046	Compromised	-0.0458009	0.947648	1.71	3.89	1.98	2.18	A_33_P3723827	Unknown
A_33_P3733123	-0.182508	Compromised	0.182508	Compromised	0	-0.111246	Compromised	1.72561	Compromised	0.807182	0.479528	2.34	2.97	2.12	6.94	A_33_P3733123	Unknown
A_33_P3744376	-0.588206	Compromised	0.588206	Compromised	1.25e-07	-1.44313	Compromised	-1.23099	Compromised	-1.33706	0.154742	4.09	9.11	1.95	2.07	A_33_P3744376	Unknown
A_33_P3751193	-0.0317769	Compromised	0.0317769	Compromised	0	0.683508	Compromised	-0.487728	Compromised	0.0978899	0.88279	3.68	3.79	5.21	2.12	A_33_P3751193	Unknown
A_33_P3765291	1.5801	Detected	-1.5801	Compromised	2.5e-07	-1.2593	Compromised	-1.02229	Compromised	-1.14079	0.546322	16.6	1.83	2	2.16	A_33_P3765291	Unknown
A_33_P3806704	-0.0739093	Compromised	0.0739093	Compromised	0	0.351636	Compromised	0.405959	Compromised	0.378798	0.0405982	1.96	2.14	2.27	2.16	A_33_P3806704	Unknown
A_33_P3809328	-0.0429561	Detected	0.0429561	Detected	0	0.0461242	Detected	-3.77326	Compromised	-1.86357	0.432156	43.5	45.5	39.9	2.59	A_33_P3809328	Unknown
A_33_P3815935	-0.314796	Compromised	0.314796	Compromised	2.4e-07	-1.20305	Compromised	-0.458497	Compromised	-0.830774	0.230487	4.25	6.48	1.98	3.04	A_33_P3815935	Unknown
A_33_P3855484	0.2507	Compromised	-0.2507	Compromised	-2.4e-07	0.584789	Compromised	-1.04386	Compromised	-0.229537	0.812873	6.55	4.56	7.12	2.11	A_33_P3855484	Unknown
A1BG	-0.0662849	Detected	0.0662849	Detected	0	-0.0555646	Detected	-0.0993211	Detected	-0.0774429	0.382765	1120	1210	973	865	NM_130786	ref|Homo sapiens alpha-1-B glycoprotein (A1BG), mRNA [NM_130786]	alpha-1-B glycoprotein	ref|NM_130786|ens|ENST00000598345|ens|ENST00000595014|ens|ENST00000263100	GO:0008150|GO:0003674|GO:0072562|GO:0005576|GO:0005615|GO:0070062	GO:0003674=molecular_function	GO:0005615=extracellular space|GO:0070062=extracellular exosome|GO:0072562=blood microparticle|GO:0005576=extracellular region	GO:0008150=biological_process	THC2461029	ENST00000598345	Hs.529161	1
A1BG-AS1	0.00110435	Detected	-0.00110435	Detected	0	0.179764	Detected	-0.258667	Detected	-0.0394518	0.873763	250	246	244	165	AK027222	gb|Homo sapiens cDNA: FLJ23569 fis, clone LNG11861. [AK027222]	A1BG antisense RNA 1	gb|AK027222|gb|BC006144|gb|BC040926|tc|NP1154677					NP1154677		Hs.709582	503538
A1CF	-0.255323	Detected	0.255323	Detected	0	-1.14115	Compromised	-2.10537	Compromised	-1.62326	0.0968231	9.9	13.9	4.62	2.17	NM_138933	ref|Homo sapiens APOBEC1 complementation factor (A1CF), transcript variant 3, mRNA [NM_138933]	APOBEC1 complementation factor	ref|NM_138933|ref|NM_001198819|ref|NM_001198820|ref|NM_001198818	GO:0003725|GO:0005515|GO:0006397|GO:0030895|GO:0010467|GO:0003727|GO:0005783|GO:0016556|GO:0003723|GO:0016554|GO:0050821|GO:0005737|GO:0000166|GO:0005654	GO:0000166=nucleotide binding|GO:0005515=protein binding|GO:0003723=RNA binding|GO:0003725=double-stranded RNA binding|GO:0003727=single-stranded RNA binding	GO:0005783=endoplasmic reticulum|GO:0005654=nucleoplasm|GO:0005737=cytoplasm|GO:0030895=apolipoprotein B mRNA editing enzyme complex	GO:0006397=mRNA processing|GO:0010467=gene expression|GO:0050821=protein stabilization|GO:0016554=cytidine to uridine editing|GO:0016556=mRNA modification	NP220852	ENST00000373995	Hs.282795	29974
A25969	-0.0503144	Compromised	0.0503144	Compromised	0	2.80427	Detected	0.451014	Compromised	1.62764	0.301073	1.94	2.05	12.1	2.17	A25969	gb|H.sapiens mRNA for T-cell receptor IGR b 18 Vbeta 7. [A25969]		gb|A25969|gb|X58812|gb|X57616|gb|X57618
A2M	-0.0153837	Detected	0.0153837	Detected	0	0.654694	Detected	1.09062	Detected	0.872656	0.0573546	45.8215	46.1308	62.871	77.9385	NM_000014	ref|Homo sapiens alpha-2-macroglobulin (A2M), mRNA [NM_000014]	alpha-2-macroglobulin	ref|NM_000014|ens|ENST00000318602|ens|ENST00000495709|ens|ENST00000495442	GO:0005515|GO:0007264|GO:0004867|GO:0072562|GO:0002020|GO:0019959|GO:0005829|GO:0019966|GO:0019838|GO:0022617|GO:0030198|GO:0031093|GO:0070062|GO:0001869|GO:0051056|GO:0043120|GO:0005102|GO:0030168|GO:0005576|GO:0010951|GO:0048863|GO:0007596|GO:0007597|GO:0002576|GO:0019899|GO:0048306	GO:0019959=interleukin-8 binding|GO:0019838=growth factor binding|GO:0002020=protease binding|GO:0019966=interleukin-1 binding|GO:0048306=calcium-dependent protein binding|GO:0005102=receptor binding|GO:0004867=serine-type endopeptidase inhibitor activity|GO:0005515=protein binding|GO:0043120=tumor necrosis factor binding|GO:0019899=enzyme binding	GO:0005576=extracellular region|GO:0070062=extracellular exosome|GO:0072562=blood microparticle|GO:0005829=cytosol|GO:0031093=platelet alpha granule lumen	GO:0007597=blood coagulation, intrinsic pathway|GO:0007596=blood coagulation|GO:0002576=platelet degranulation|GO:0048863=stem cell differentiation|GO:0001869=negative regulation of complement activation, lectin pathway|GO:0010951=negative regulation of endopeptidase activity|GO:0030168=platelet activation|GO:0007264=small GTPase mediated signal transduction|GO:0022617=extracellular matrix disass…	NP1159902	ENST00000318602	Hs.212838	2
A2M-AS1	0.0320783	Detected	-0.0320783	Detected	0	-0.00470877	Detected	-0.179908	Detected	-0.0923083	0.426714	95.2108	89.7497	80.035	64.9554	NR_026971	ref|Homo sapiens A2M antisense RNA 1 (head to head) (A2M-AS1), long non-coding RNA [NR_026971]	A2M antisense RNA 1 (head to head)	ref|NR_026971|linc|lnc-KLRG1-1:1|gb|AK056852|gb|AK096375					THC2505447		Hs.592432	144571
A2ML1	-0.205988	Compromised	0.205988	Compromised	0	0.15456	Compromised	2.59581	Detected	1.37518	0.382265	1.96	2.57	2.17	10.8	NM_144670	ref|Homo sapiens alpha-2-macroglobulin-like 1 (A2ML1), transcript variant 1, mRNA [NM_144670]	alpha-2-macroglobulin-like 1	ref|NM_144670|ref|NM_001282424|ens|ENST00000541459|ens|ENST00000537475	GO:0010951|GO:0004867|GO:0030414|GO:0005615|GO:0052548|GO:0070062	GO:0030414=peptidase inhibitor activity|GO:0004867=serine-type endopeptidase inhibitor activity	GO:0005615=extracellular space|GO:0070062=extracellular exosome	GO:0010951=negative regulation of endopeptidase activity|GO:0052548=regulation of endopeptidase activity	NP1162821	ENST00000541459	Hs.620532	144568
A2MP1	0.0719991	Detected	-0.0719988	Detected	1.175e-07	0.445486	Detected	-1.39488	Compromised	-0.474699	0.658232	11.1	9.9	12.4	3.17315	NR_040112	ref|Homo sapiens alpha-2-macroglobulin pseudogene 1 (A2MP1), non-coding RNA [NR_040112]	alpha-2-macroglobulin pseudogene 1	ref|NR_040112|ens|ENST00000543404|linc|lnc-PZP-1:1|tc|THC2644733						ENST00000566278	Hs.569125	3
A3GALT2	-0.0431395	Compromised	0.0431395	Compromised	0	0.34327	Compromised	0.816119	Compromised	0.579694	0.137337	1.73	1.81	1.95	2.48	NM_001080438	ref|Homo sapiens alpha 1,3-galactosyltransferase 2 (A3GALT2), mRNA [NM_001080438]	alpha 1,3-galactosyltransferase 2	ref|NM_001080438|ens|ENST00000442999|tc|NP1250934					NP1250934	ENST00000442999		127550
A4GALT	0.101822	Detected	-0.101822	Detected	-2.38e-07	-0.276386	Detected	-0.312509	Detected	-0.294447	0.104387	3120	2670	2070	1850	NM_017436	ref|Homo sapiens alpha 1,4-galactosyltransferase (A4GALT), mRNA [NM_017436]	alpha 1,4-galactosyltransferase	ref|NM_017436|ens|ENST00000381278|ens|ENST00000401850|ens|ENST00000249005	GO:0007009|GO:0030173|GO:0050512|GO:0016020|GO:0001576|GO:0015643|GO:0006688|GO:0006486|GO:0008378|GO:0070062	GO:0015643=toxic substance binding|GO:0008378=galactosyltransferase activity|GO:0050512=lactosylceramide 4-alpha-galactosyltransferase activity	GO:0070062=extracellular exosome|GO:0030173=integral component of Golgi membrane|GO:0016020=membrane	GO:0001576=globoside biosynthetic process|GO:0007009=plasma membrane organization|GO:0006486=protein glycosylation|GO:0006688=glycosphingolipid biosynthetic process	THC2462020	ENST00000381278	Hs.105956	53947
A4GNT	-0.0418987	Compromised	0.0418987	Compromised	0	0.294665	Compromised	0.492439	Compromised	0.393552	0.067065	1.8	1.88	1.96	2.06	NM_016161	ref|Homo sapiens alpha-1,4-N-acetylglucosaminyltransferase (A4GNT), mRNA [NM_016161]	alpha-1,4-N-acetylglucosaminyltransferase	ref|NM_016161|ens|ENST00000236709|gb|BC119640|gb|BC119639	GO:0008375|GO:0009101|GO:0016020|GO:0006493|GO:0000139|GO:0005975|GO:0050680|GO:0016021	GO:0008375=acetylglucosaminyltransferase activity	GO:0016020=membrane|GO:0016021=integral component of membrane|GO:0000139=Golgi membrane	GO:0005975=carbohydrate metabolic process|GO:0009101=glycoprotein biosynthetic process|GO:0006493=protein O-linked glycosylation|GO:0050680=negative regulation of epithelial cell proliferation	THC2485728	ENST00000236709	Hs.278960	51146
AA06	-0.922889	Compromised	0.922889	Compromised	0	-0.540163	Compromised	-0.276017	Compromised	-0.40809	0.704319	1.77	6.27	1.99	2.19	NR_037584	ref|Homo sapiens uncharacterized LOC100506677 (AA06), non-coding RNA [NR_037584]	uncharacterized LOC100506677	ref|NR_037584|linc|lnc-MYO1D-3:1|gb|AF381172|gb|AF381173					THC2616013		Hs.652571	100506677
AA489744	-1.58936	Compromised	1.58936	Detected	0	-1.38213	Compromised	-1.26266	Compromised	-1.3224	0.493181	2.23	19.9	2.22	2.21	AA489744	gb|aa43c10.r1 Soares_NhHMPu_S1 Homo sapiens cDNA clone IMAGE:823698 5', mRNA sequence [AA489744]		gb|AA489744
AA496144	-0.593609	Compromised	0.593609	Compromised	0	0.466589	Compromised	-0.309149	Compromised	0.0787199	0.921741	2.13	4.78	3.83	2.05	AA496144	gb|zv51g10.r1 Soares_testis_NHT Homo sapiens cDNA clone IMAGE:757218 5', mRNA sequence [AA496144]		gb|AA496144|tc|THC2667977
AA504818	0.000829458	Detected	-0.000829458	Detected	0	-0.265042	Detected	-0.0156243	Detected	-0.140333	0.377368	1280	1260	918	1000	AA504818	gb|aa64c04.s1 NCI_CGAP_GCB1 Homo sapiens cDNA clone IMAGE:825702 3' similar to contains Alu repetitive element;contains element TAR1 repetitive element ;, mRNA sequence [AA504818]		gb|AA504818|tc|THC2630254|tc|THC2473967
AA593742	-0.487594	Compromised	0.487594	Detected	1.2e-07	-0.573944	Compromised	-0.664629	Compromised	-0.619286	0.333416	6.71	13	5.45	4.69	AA593742	gb|nl83g08.s1 NCI_CGAP_Br2 Homo sapiens cDNA clone IMAGE:1057310 3' similar to contains L1.t2 L1 repetitive element ;, mRNA sequence [AA593742]		gb|AA593742|tc|THC2723561
AA682772	-0.0421276	Compromised	0.0421276	Compromised	0	0.95932	Compromised	0.453866	Compromised	0.706593	0.110175	2.01	2.1	3.47	2.24	AA682772	gb|ah52h03.s1 Soares_testis_NHT Homo sapiens cDNA clone 1293173 3', mRNA sequence [AA682772]		gb|AA682772
AA778499	-0.0756588	Detected	0.0756588	Detected	0	0.0320063	Detected	-0.228	Detected	-0.0979967	0.581583	127	139	118	90.3	AA778499	gb|af85e03.s1 Soares_testis_NHT Homo sapiens cDNA clone 1048828 3', mRNA sequence [AA778499]		gb|AA778499
AAAS	-0.0533955	Detected	0.0533955	Detected	0	-0.0169928	Detected	-0.240953	Detected	-0.128973	0.407703	1470	1560	1300	1020	NM_015665	ref|Homo sapiens achalasia, adrenocortical insufficiency, alacrimia (AAAS), transcript variant 1, mRNA [NM_015665]	achalasia, adrenocortical insufficiency, alacrimia	ref|NM_015665|ref|NM_001173466|ens|ENST00000552876|ens|ENST00000209873	GO:0007077|GO:0010467|GO:0019221|GO:0019058|GO:0005634|GO:0044281|GO:0005635|GO:0015031|GO:0008645|GO:0003674|GO:0005737|GO:0015758|GO:0005643|GO:0016032|GO:0007612|GO:0046822|GO:0005813|GO:0031965|GO:0005975|GO:0019083|GO:0055085|GO:0010827|GO:0006913|GO:0009566|GO:0016020|GO:0009405|GO:0005654|GO:0051028|GO:0000278	GO:0003674=molecular_function	GO:0005654=nucleoplasm|GO:0005643=nuclear pore|GO:0005635=nuclear envelope|GO:0005634=nucleus|GO:0005813=centrosome|GO:0031965=nuclear membrane|GO:0005737=cytoplasm|GO:0016020=membrane	GO:0007077=mitotic nuclear envelope disassembly|GO:0015031=protein transport|GO:0007612=learning|GO:0008645=hexose transport|GO:0000278=mitotic cell cycle|GO:0044281=small molecule metabolic process|GO:0019083=viral transcription|GO:0006913=nucleocytoplasmic transport|GO:0019221=cytokine-mediated signaling pathway|GO:0016032=viral process|GO:0051028=mRNA transport|GO:0055085=transmembrane transpo…	THC2533646	ENST00000552876	Hs.369144	8086
AACS	-0.034157	Detected	0.034157	Detected	0	0.0466955	Detected	-0.71232	Detected	-0.332812	0.474532	567.327	586.216	517.417	280.175	NM_023928	ref|Homo sapiens acetoacetyl-CoA synthetase (AACS), mRNA [NM_023928]	acetoacetyl-CoA synthetase	ref|NM_023928|ens|ENST00000538851|ens|ENST00000536118|ens|ENST00000543665	GO:0007584|GO:0042493|GO:0045471|GO:0034201|GO:0005524|GO:0014074|GO:0047760|GO:0005829|GO:0001889|GO:0071397|GO:0042594|GO:0071394|GO:0050872|GO:0006631|GO:0032024|GO:0071333|GO:0060612|GO:0030729	GO:0005524=ATP binding|GO:0030729=acetoacetate-CoA ligase activity|GO:0047760=butyrate-CoA ligase activity	GO:0005829=cytosol	GO:0014074=response to purine-containing compound|GO:0042594=response to starvation|GO:0007584=response to nutrient|GO:0006631=fatty acid metabolic process|GO:0060612=adipose tissue development|GO:0071394=cellular response to testosterone stimulus|GO:0050872=white fat cell differentiation|GO:0045471=response to ethanol|GO:0071333=cellular response to glucose stimulus|GO:0042493=response to drug|G…	NP1467485	ENST00000316543	Hs.656073	65985
AACSP1	0.175746	Detected	-0.175746	Detected	0	-0.406751	Detected	-0.733735	Detected	-0.570243	0.140726	29	22.4	16.7	12.2	NR_024035	ref|Homo sapiens acetoacetyl-CoA synthetase pseudogene 1 (AACSP1), non-coding RNA [NR_024035]	acetoacetyl-CoA synthetase pseudogene 1	ref|NR_024035|ens|ENST00000521412|ens|ENST00000503486|linc|TCONS_l2_00023283					THC2631045	ENST00000521412	Hs.382790	729522
AADAC	-0.0354967	Compromised	0.0354962	Compromised	-2.375e-07	0.279462	Compromised	0.43501	Compromised	0.357236	0.0527782	2.0136	2.08451	2.16	2.20472	NM_001086	ref|Homo sapiens arylacetamide deacetylase (AADAC), mRNA [NM_001086]	arylacetamide deacetylase	ref|NM_001086|ens|ENST00000232892|ref|XM_005247103|ref|XM_005247104	GO:0004806|GO:0008152|GO:0019213|GO:0005789|GO:0010898|GO:0017171|GO:0016021|GO:0003824|GO:0016298	GO:0017171=serine hydrolase activity|GO:0003824=catalytic activity|GO:0004806=triglyceride lipase activity|GO:0016298=lipase activity|GO:0019213=deacetylase activity	GO:0005789=endoplasmic reticulum membrane|GO:0016021=integral component of membrane	GO:0008152=metabolic process|GO:0010898=positive regulation of triglyceride catabolic process	THC2472269	ENST00000232892	Hs.506908	13
AADACL2	-0.0517616	Compromised	0.0517616	Compromised	0	0.389179	Compromised	0.653325	Compromised	0.521252	0.0667326	1.7	1.8	1.99	2.19	NM_207365	ref|Homo sapiens arylacetamide deacetylase-like 2 (AADACL2), mRNA [NM_207365]	arylacetamide deacetylase-like 2	ref|NM_207365|ens|ENST00000356517|ens|ENST00000570799|gb|BC065724	GO:0052689|GO:0008152|GO:0005576|GO:0016021	GO:0052689=carboxylic ester hydrolase activity	GO:0016021=integral component of membrane|GO:0005576=extracellular region	GO:0008152=metabolic process	THC2480355	ENST00000356517	Hs.144710	344752
AADACL2-AS1	-0.168787	Compromised	0.168786	Compromised	-2.4e-07	-0.451857	Compromised	-1.30521	Compromised	-0.878535	0.195631	5.87	7.31	4.16	2.11	NR_110203	ref|Homo sapiens AADACL2 antisense RNA 1 (AADACL2-AS1), transcript variant 2, long non-coding RNA [NR_110203]	AADACL2 antisense RNA 1	ref|NR_110203|ref|NR_110202|linc|lnc-IGSF10-2:1|linc|lnc-IGSF10-2:2					THC2645463		Hs.680207	101928142
AADACL3	-0.269764	Detected	0.269764	Detected	0	-0.187508	Detected	-0.925748	Detected	-0.556628	0.347568	33.3	47.7	30.4	16.7	NM_001103170	ref|Homo sapiens arylacetamide deacetylase-like 3 (AADACL3), transcript variant 1, mRNA [NM_001103170]	arylacetamide deacetylase-like 3	ref|NM_001103170|ref|NR_111984|ens|ENST00000620146|gb|AK127828	GO:0016787|GO:0008152	GO:0016787=hydrolase activity		GO:0008152=metabolic process	THC2604262	ENST00000359318	Hs.464705	126767
AADACL4	0.168767	Compromised	-0.168768	Compromised	-2.4e-07	0.100376	Compromised	1.11736	Compromised	0.608867	0.373602	2.59	2.02	2.13	3.95	NM_001013630	ref|Homo sapiens arylacetamide deacetylase-like 4 (AADACL4), mRNA [NM_001013630]	arylacetamide deacetylase-like 4	ref|NM_001013630|ens|ENST00000376221|ref|XM_006710608|tc|THC2661558	GO:0052689|GO:0008152|GO:0016021	GO:0052689=carboxylic ester hydrolase activity	GO:0016021=integral component of membrane	GO:0008152=metabolic process	THC2661558	ENST00000376221	Hs.209954	343066
AADACP1	-0.210574	Detected	0.210574	Detected	0	-0.187389	Detected	-0.516601	Detected	-0.351995	0.318502	19.4	25.6	17	12.4	NR_026915	ref|Homo sapiens arylacetamide deacetylase pseudogene 1 (AADACP1), non-coding RNA [NR_026915]	arylacetamide deacetylase pseudogene 1	ref|NR_026915|ens|ENST00000483636|linc|lnc-AADACL2-1:2|linc|TCONS_l2_00018935					THC2608394	ENST00000483636	Hs.383050	201651
AADAT	0.0487912	Detected	-0.0487912	Detected	0	-0.271184	Detected	0.401082	Detected	0.0649493	0.866006	456	420	315	460	NM_016228	ref|Homo sapiens aminoadipate aminotransferase (AADAT), transcript variant 1, mRNA [NM_016228]	aminoadipate aminotransferase	ref|NM_016228|ref|NM_001286683|ref|NM_001286682|ref|NM_182662	GO:0070189|GO:0006569|GO:0006536|GO:0009058|GO:0033512|GO:0047536|GO:0044281|GO:0042803|GO:0034641|GO:0097052|GO:0019441|GO:0005759|GO:0006103|GO:0030170|GO:0016212|GO:0006554	GO:0030170=pyridoxal phosphate binding|GO:0042803=protein homodimerization activity|GO:0047536=2-aminoadipate transaminase activity|GO:0016212=kynurenine-oxoglutarate transaminase activity	GO:0005759=mitochondrial matrix	GO:0009058=biosynthetic process|GO:0097052=L-kynurenine metabolic process|GO:0006103=2-oxoglutarate metabolic process|GO:0006554=lysine catabolic process|GO:0044281=small molecule metabolic process|GO:0006569=tryptophan catabolic process|GO:0006536=glutamate metabolic process|GO:0070189=kynurenine metabolic process|GO:0019441=tryptophan catabolic process to kynurenine|GO:0034641=cellular nitrogen…	THC2488049	ENST00000353187	Hs.529735	51166
AAED1	-0.020345	Detected	0.020345	Detected	0	-0.0539486	Detected	-0.156234	Detected	-0.105092	0.196422	292	296	246	210	NM_153698	ref|Homo sapiens AhpC/TSA antioxidant enzyme domain containing 1 (AAED1), mRNA [NM_153698]	AhpC/TSA antioxidant enzyme domain containing 1	ref|NM_153698|ref|XM_005251783|ref|XM_005251784|gb|BC136503					THC2498207	ENST00000375234	Hs.44640	195827
AAGAB	-0.00388145	Detected	0.00388193	Detected	2.384e-07	-0.227443	Detected	0.0384865	Detected	-0.0944781	0.551198	10900	10800	8050	8870	NM_024666	ref|Homo sapiens alpha- and gamma-adaptin binding protein (AAGAB), transcript variant 1, mRNA [NM_024666]	alpha- and gamma-adaptin binding protein	ref|NM_024666|ref|NM_001271886|ref|NM_001271885|ens|ENST00000538028	GO:0005737|GO:0005654|GO:0015031|GO:0005829		GO:0005737=cytoplasm|GO:0005829=cytosol|GO:0005654=nucleoplasm	GO:0015031=protein transport	THC2601734	ENST00000538028	Hs.254642	79719
AAK1	-0.0564861	Detected	0.0564861	Detected	0	-0.208112	Detected	-0.133416	Detected	-0.170764	0.127794	137.886	146.957	107.04	103.301	NM_014911	ref|Homo sapiens AP2 associated kinase 1 (AAK1), mRNA [NM_014911]	AP2 associated kinase 1	ref|NM_014911|ens|ENST00000409085|ens|ENST00000339092|tc|THC2684828	GO:0045747|GO:0005515|GO:0035612|GO:0030136|GO:0050821|GO:0005112|GO:0005524|GO:0006897|GO:0032880|GO:0005905|GO:0046777|GO:0004674|GO:0043195|GO:2000369|GO:0006468|GO:0031252|GO:0019897	GO:0005112=Notch binding|GO:0004674=protein serine/threonine kinase activity|GO:0005524=ATP binding|GO:0005515=protein binding|GO:0035612=AP-2 adaptor complex binding	GO:0031252=cell leading edge|GO:0043195=terminal bouton|GO:0005905=coated pit|GO:0030136=clathrin-coated vesicle|GO:0019897=extrinsic component of plasma membrane	GO:0032880=regulation of protein localization|GO:0046777=protein autophosphorylation|GO:0006897=endocytosis|GO:0006468=protein phosphorylation|GO:0045747=positive regulation of Notch signaling pathway|GO:0050821=protein stabilization|GO:2000369=regulation of clathrin-mediated endocytosis	THC2574997	ENST00000406297		22848
AAMDC	-0.0549355	Detected	0.054935	Detected	-2.375e-07	0.310775	Detected	0.220365	Detected	0.26557	0.0648607	2520	2680	2800	2410	NM_024684	ref|Homo sapiens adipogenesis associated, Mth938 domain containing (AAMDC), mRNA [NM_024684]	adipogenesis associated, Mth938 domain containing	ref|NM_024684|ens|ENST00000526415|ens|ENST00000393427|ens|ENST00000526164	GO:0043066|GO:0005737|GO:0045944|GO:0045600		GO:0005737=cytoplasm	GO:0043066=negative regulation of apoptotic process|GO:0045600=positive regulation of fat cell differentiation|GO:0045944=positive regulation of transcription from RNA polymerase II promoter	THC2473324	ENST00000526415	Hs.745040	28971
AAMP	-0.0198183	Detected	0.0198188	Detected	2.385e-07	0.156003	Detected	-0.268209	Detected	-0.0561032	0.816924	4630	4690	4510	3080	NM_001087	ref|Homo sapiens angio-associated, migratory cell protein (AAMP), transcript variant 2, mRNA [NM_001087]	angio-associated, migratory cell protein	ref|NM_001087|ref|NM_001302545|ens|ENST00000489767|ens|ENST00000494720	GO:0010595|GO:0005737|GO:0009986|GO:0005886|GO:0014909|GO:0001525|GO:0008201|GO:0030154	GO:0008201=heparin binding	GO:0005737=cytoplasm|GO:0005886=plasma membrane|GO:0009986=cell surface	GO:0014909=smooth muscle cell migration|GO:0001525=angiogenesis|GO:0030154=cell differentiation|GO:0010595=positive regulation of endothelial cell migration	THC2561212	ENST00000489767	Hs.83347	14
AANAT	0.188579	Detected	-0.188579	Detected	0	-0.168249	Detected	-0.0639613	Detected	-0.116105	0.613074	19.9	15.1	13.4	13.2	NM_001166579	ref|Homo sapiens aralkylamine N-acetyltransferase (AANAT), transcript variant 1, mRNA [NM_001166579]	aralkylamine N-acetyltransferase	ref|NM_001166579|ref|NM_001088|ref|NR_110548|ens|ENST00000250615	GO:0051412|GO:0032868|GO:0048471|GO:0030187|GO:0044281|GO:0010043|GO:0005829|GO:0071889|GO:0051592|GO:0034641|GO:0046219|GO:0034695|GO:0004060|GO:0007623|GO:0009416|GO:0004059|GO:0071320|GO:0046688|GO:0034097|GO:0006474	GO:0004060=arylamine N-acetyltransferase activity|GO:0004059=aralkylamine N-acetyltransferase activity|GO:0071889=14-3-3 protein binding	GO:0048471=perinuclear region of cytoplasm|GO:0005829=cytosol	GO:0034097=response to cytokine|GO:0010043=response to zinc ion|GO:0034695=response to prostaglandin E|GO:0046688=response to copper ion|GO:0006474=N-terminal protein amino acid acetylation|GO:0046219=indolalkylamine biosynthetic process|GO:0007623=circadian rhythm|GO:0009416=response to light stimulus|GO:0044281=small molecule metabolic process|GO:0051412=response to corticosterone|GO:0032868=re…	THC2490308	ENST00000250615	Hs.431417	15
AAR2	0.0562613	Detected	-0.0562613	Detected	0	0.0815232	Detected	-0.0622547	Detected	0.00963426	0.92558	1470	1340	1290	1070	NM_015511	ref|Homo sapiens AAR2 splicing factor homolog (S. cerevisiae) (AAR2), transcript variant 1, mRNA [NM_015511]	AAR2 splicing factor homolog (S. cerevisiae)	ref|NM_015511|ref|NM_001271874|ens|ENST00000373932|ens|ENST00000320849					THC2466790	ENST00000373932	Hs.11314	25980
AARD	0.153661	Detected	-0.153661	Compromised	0	0.0210834	Compromised	-1.14408	Compromised	-0.561498	0.449751	11.2	8.92	8.81	3.6	NM_001025357	ref|Homo sapiens alanine and arginine rich domain containing protein (AARD), mRNA [NM_001025357]	alanine and arginine rich domain containing protein	ref|NM_001025357|ens|ENST00000378279|gb|BC142621|tc|THC2533349	GO:0030324			GO:0030324=lung development	THC2533349	ENST00000378279	Hs.437551	441376
AARS	0.0181065	Detected	-0.0181069	Detected	-2.385e-07	0.311633	Detected	-0.389282	Detected	-0.0388246	0.922008	3340	3210	3530	1990	NM_001605	ref|Homo sapiens alanyl-tRNA synthetase (AARS), mRNA [NM_001605]	alanyl-tRNA synthetase	ref|NM_001605|ens|ENST00000569825|ens|ENST00000261772|gb|DQ891634	GO:0010467|GO:0002161|GO:0000049|GO:0006419|GO:0004813|GO:0005524|GO:0006400|GO:0008033|GO:0030968|GO:0005829|GO:0006418|GO:0043524|GO:0005737|GO:0016020|GO:0021680|GO:0006457|GO:0050885|GO:0008270|GO:0006450|GO:0043200|GO:0016597|GO:0001942|GO:0070062	GO:0008270=zinc ion binding|GO:0002161=aminoacyl-tRNA editing activity|GO:0000049=tRNA binding|GO:0005524=ATP binding|GO:0004813=alanine-tRNA ligase activity|GO:0016597=amino acid binding	GO:0070062=extracellular exosome|GO:0005737=cytoplasm|GO:0016020=membrane|GO:0005829=cytosol	GO:0008033=tRNA processing|GO:0006450=regulation of translational fidelity|GO:0043200=response to amino acid|GO:0006457=protein folding|GO:0006400=tRNA modification|GO:0043524=negative regulation of neuron apoptotic process|GO:0006418=tRNA aminoacylation for protein translation|GO:0021680=cerebellar Purkinje cell layer development|GO:0001942=hair follicle development|GO:0030968=endoplasmic reticu…	THC2576320	ENST00000569825	Hs.315137	16
AARS2	0.0363266	Detected	-0.0363266	Detected	0	-0.168032	Detected	0.0173295	Detected	-0.0753515	0.528099	1590	1490	1190	1240	NM_020745	ref|Homo sapiens alanyl-tRNA synthetase 2, mitochondrial (AARS2), mRNA [NM_020745]	alanyl-tRNA synthetase 2, mitochondrial	ref|NM_020745|ens|ENST00000244571|ref|XM_005249245|gb|AB033096	GO:0005739|GO:0010467|GO:0000049|GO:0033108|GO:0070143|GO:0004813|GO:0008270|GO:0005524|GO:0006418	GO:0005524=ATP binding|GO:0008270=zinc ion binding|GO:0004813=alanine-tRNA ligase activity|GO:0000049=tRNA binding	GO:0005739=mitochondrion	GO:0006418=tRNA aminoacylation for protein translation|GO:0070143=mitochondrial alanyl-tRNA aminoacylation|GO:0010467=gene expression|GO:0033108=mitochondrial respiratory chain complex assembly	THC2491596	ENST00000244571	Hs.158381	57505
AASDH	0.0908773	Detected	-0.0908773	Detected	0	-0.304224	Detected	0.0646155	Detected	-0.119804	0.619028	183	159	120	142	NM_181806	ref|Homo sapiens aminoadipate-semialdehyde dehydrogenase (AASDH), transcript variant 1, mRNA [NM_181806]	aminoadipate-semialdehyde dehydrogenase	ref|NM_181806|ref|NM_001286672|ref|NM_001286671|ref|NM_001286669	GO:0006631|GO:0016878|GO:0005524	GO:0005524=ATP binding|GO:0016878=acid-thiol ligase activity		GO:0006631=fatty acid metabolic process	THC2703687	ENST00000502617	Hs.104347	132949
AASDHPPT	0.0479469	Detected	-0.0479474	Detected	-2.385e-07	-0.411695	Detected	0.164259	Detected	-0.123718	0.712955	2440	2250	1530	2090	NM_015423	ref|Homo sapiens aminoadipate-semialdehyde dehydrogenase-phosphopantetheinyl transferase (AASDHPPT), mRNA [NM_015423]	aminoadipate-semialdehyde dehydrogenase-phosphopantetheinyl transferase	ref|NM_015423|ens|ENST00000534152|ens|ENST00000278618|gb|AB072896	GO:0005515|GO:0000287|GO:0015939|GO:0009059|GO:0006766|GO:0006767|GO:0044281|GO:0008897|GO:0070062|GO:0005829	GO:0000287=magnesium ion binding|GO:0005515=protein binding|GO:0008897=holo-[acyl-carrier-protein] synthase activity	GO:0070062=extracellular exosome|GO:0005829=cytosol	GO:0044281=small molecule metabolic process|GO:0006767=water-soluble vitamin metabolic process|GO:0015939=pantothenate metabolic process|GO:0009059=macromolecule biosynthetic process|GO:0006766=vitamin metabolic process	THC2469513	ENST00000534152	Hs.524009	60496
AASS	-0.379727	Compromised	0.379728	Compromised	2.4e-07	-1.18038	Compromised	-0.977149	Compromised	-1.07876	0.111087	4.04	6.74	2	2.11	NM_005763	ref|Homo sapiens aminoadipate-semialdehyde synthase (AASS), mRNA [NM_005763]	aminoadipate-semialdehyde synthase	ref|NM_005763|ens|ENST00000358954|ens|ENST00000431170|ens|ENST00000417368	GO:0005739|GO:0034641|GO:0051262|GO:0033512|GO:0005759|GO:0047130|GO:0047131|GO:0044281|GO:0006554|GO:0055114|GO:0043231	GO:0047131=saccharopine dehydrogenase (NAD+, L-glutamate-forming) activity|GO:0047130=saccharopine dehydrogenase (NADP+, L-lysine-forming) activity	GO:0005759=mitochondrial matrix|GO:0043231=intracellular membrane-bounded organelle|GO:0005739=mitochondrion	GO:0044281=small molecule metabolic process|GO:0051262=protein tetramerization|GO:0055114=oxidation-reduction process|GO:0034641=cellular nitrogen compound metabolic process|GO:0006554=lysine catabolic process|GO:0033512=L-lysine catabolic process to acetyl-CoA via saccharopine	THC2471460	ENST00000358954	Hs.156738	10157
AATBC	-0.170927	Detected	0.170927	Detected	0	-0.0278618	Detected	0.25871	Detected	0.115424	0.656355	17.9455	22.4143	17.088	19.1	NR_026961	ref|Homo sapiens uncharacterized LOC284837 (AATBC), long non-coding RNA [NR_026961]	uncharacterized LOC284837	ref|NR_026961|linc|lnc-CSTB-1:6|linc|lnc-CSTB-1:8|linc|lnc-CSTB-1:9							Hs.592159	284837
AATF	-0.058054	Detected	0.0580544	Detected	2.385e-07	0.348944	Detected	-0.17006	Detected	0.0894418	0.768617	2790	2980	3190	2040	NM_012138	ref|Homo sapiens apoptosis antagonizing transcription factor (AATF), mRNA [NM_012138]	apoptosis antagonizing transcription factor	ref|NM_012138|ens|ENST00000620004|ens|ENST00000619387|gb|AB385572	GO:0005515|GO:0048011|GO:0043066|GO:0005813|GO:0043065|GO:0003700|GO:0005794|GO:0042254|GO:0048156|GO:0005730|GO:0032929|GO:0005634|GO:0097190|GO:0042985|GO:0006974|GO:0043522|GO:0007346|GO:0005737|GO:0040016|GO:0045944|GO:2000378|GO:0007155|GO:0005925	GO:0043522=leucine zipper domain binding|GO:0003700=transcription factor activity, sequence-specific DNA binding|GO:0005515=protein binding|GO:0048156=tau protein binding	GO:0005794=Golgi apparatus|GO:0005730=nucleolus|GO:0005634=nucleus|GO:0005813=centrosome|GO:0005925=focal adhesion|GO:0005737=cytoplasm	GO:0040016=embryonic cleavage|GO:0042254=ribosome biogenesis|GO:0097190=apoptotic signaling pathway|GO:0007155=cell adhesion|GO:0006974=cellular response to DNA damage stimulus|GO:0045944=positive regulation of transcription from RNA polymerase II promoter|GO:0042985=negative regulation of amyloid precursor protein biosynthetic process|GO:0007346=regulation of mitotic cell cycle|GO:0048011=neurot…	THC2763179	ENST00000620004	Hs.195740	26574
AATK	0.0145743	Detected	-0.0145743	Detected	0	-0.249964	Detected	-0.0561697	Detected	-0.153067	0.25867	163.753	158.152	117.55	123.207	NM_001080395	ref|Homo sapiens apoptosis-associated tyrosine kinase (AATK), transcript variant 1, mRNA [NM_001080395]	apoptosis-associated tyrosine kinase	ref|NM_001080395|ref|NM_004920|ens|ENST00000374792|ens|ENST00000570932	GO:0005515|GO:0048471|GO:0005783|GO:0044295|GO:0051402|GO:0005524|GO:0004674|GO:0007420|GO:0030517|GO:0004713|GO:0016021|GO:0032482|GO:0055037|GO:0038083	GO:0004674=protein serine/threonine kinase activity|GO:0005524=ATP binding|GO:0004713=protein tyrosine kinase activity|GO:0005515=protein binding	GO:0005783=endoplasmic reticulum|GO:0048471=perinuclear region of cytoplasm|GO:0044295=axonal growth cone|GO:0016021=integral component of membrane|GO:0055037=recycling endosome	GO:0032482=Rab protein signal transduction|GO:0038083=peptidyl-tyrosine autophosphorylation|GO:0007420=brain development|GO:0030517=negative regulation of axon extension|GO:0051402=neuron apoptotic process	THC2471583	ENST00000374792	Hs.514575	9625
AATK-AS1	0.238463	Compromised	-0.238463	Compromised	0	0.676605	Compromised	-0.276249	Compromised	0.200178	0.743228	3.93233	2.78446	4.59421	2.17495	NR_027255	ref|Homo sapiens AATK antisense RNA 1 (AATK-AS1), long non-coding RNA [NR_027255]	AATK antisense RNA 1	ref|NR_027255|linc|lnc-BAIAP2-2:2|linc|lnc-BAIAP2-2:1|gb|BC171777					THC2489764		Hs.591202	388428
AB020701	-0.00301647	Compromised	0.00301695	Compromised	2.384e-07	0.269285	Compromised	0.499105	Compromised	0.384195	0.079049	1.93	1.91	2.01	2.16	AB020701	gb|Homo sapiens mRNA for KIAA0894 protein, partial cds. [AB020701]		gb|AB020701|tc|THC2492724|tc|THC2676699
AB051446	-0.0512953	Compromised	0.0512958	Compromised	2.385e-07	0.350857	Compromised	0.603597	Compromised	0.477227	0.0728595	1.72	1.82	1.96	2.14	AB051446	gb|Homo sapiens mRNA for KIAA1659 protein, partial cds. [AB051446]		gb|AB051446|tc|THC2578064
AB072904	-0.23811	Compromised	0.23811	Compromised	0	-1.24367	Compromised	-1.03968	Compromised	-1.14168	0.0478166	4.61	6.32	1.98	2.09	AB072904	gb|Homo sapiens mRNA for putative protein product of Nbla11895, complete cds. [AB072904]		gb|AB072904|tc|THC2489892
AB088847	-0.0435753	Compromised	0.0435753	Compromised	0	0.221794	Compromised	0.425398	Compromised	0.323596	0.0998689	1.92	2.01	1.99	2.1	AB088847	gb|Homo sapiens BPA-1 mRNA for brain peptide A1, complete cds. [AB088847]		gb|AB088847
AB209400	0.033201	Detected	-0.033201	Detected	0	-0.107202	Detected	0.455353	Detected	0.174075	0.60142	340	320	266	360	AB209400	gb|Homo sapiens mRNA for basic FGF-repressed Zic binding protein isoform a variant protein. [AB209400]		gb|AB209400|tc|THC2718458|tc|THC2621953
AB306153	-0.561556	Compromised	0.561556	Compromised	2.4e-07	1.35085	Compromised	0.211933	Compromised	0.781389	0.431596	1.91	4.1	6.2	2.58	AB306153	gb|Homo sapiens mRNA for T cell receptor beta variable 5, partial cds, clone: un 66. [AB306153]		gb|AB306153|gb|M97709|gb|A25490|gb|X58803
AB306238	-0.375976	Compromised	0.375977	Compromised	2.3e-07	-0.398876	Compromised	-0.176216	Compromised	-0.287546	0.539668	2.38	3.95	2.02	2.16	AB306238	gb|Homo sapiens mRNA for T cell receptor beta variable 6, partial cds, clone: un 226. [AB306238]		gb|AB306238|gb|AB305928|gb|AB305899|gb|AF397442
AB363267	-0.255028	Compromised	0.255028	Compromised	0	-0.273267	Compromised	0.130355	Compromised	-0.071456	0.846478	4.04	5.67	3.44	4.17	AB363267	gb|Homo sapiens IGK mRNA for immunoglobulin kappa light chain, partial cds, clone: F010-014L. [AB363267]		gb|AB363267|gb|AF103412|gb|DQ322856|gb|DQ322857
AB384543	-0.964957	Compromised	0.964957	Compromised	0	0.408827	Compromised	0.907228	Compromised	0.658028	0.576959	1.96	7.36	4.38	5.67	AB384543	gb|Synthetic construct DNA, clone: pF1KA0919, Homo sapiens EXOC6B gene for exocyst complex component Sec15B, complete cds, without stop codon, in Flexi system. [AB384543]		gb|AB384543|tc|THC2605866
AB385295	0.0478308	Detected	-0.0478308	Detected	0	-0.694294	Detected	-0.463469	Detected	-0.578882	0.0435557	386	356	199	214	AB385295	gb|Synthetic construct DNA, clone: pF1KA0197, Homo sapiens NUP160 gene for nucleoporin 160kDa, complete cds, without stop codon, in Flexi system. [AB385295]		gb|AB385295|gb|D83781|tc|THC2495390
AB529256	0.130355	Detected	-0.130355	Detected	0	-1.58039	Compromised	-0.925475	Compromised	-1.25293	0.0708254	18.6	15.3	4.9	7.07	AB529256	gb|Synthetic construct DNA, clone: pF1KE0827, Homo sapiens OR4A13P gene for Putative olfactory receptor, family 4, subfamily A, member 13, without stop codon, in Flexi system. [AB529256]		gb|AB529256|tc|NP511198
ABAT	-0.0229836	Detected	0.022984	Detected	2.385e-07	-0.336206	Detected	0.0275993	Detected	-0.154304	0.48861	4020	4090	2790	3290	NM_000663	ref|Homo sapiens 4-aminobutyrate aminotransferase (ABAT), transcript variant 2, mRNA [NM_000663]	4-aminobutyrate aminotransferase	ref|NM_000663|ens|ENST00000568847|ens|ENST00000561870|ens|ENST00000566590	GO:0043005|GO:0001666|GO:0003867|GO:0045471|GO:0042493|GO:0048148|GO:0007268|GO:0045776|GO:0047298|GO:0042803|GO:0007269|GO:0005739|GO:0032145|GO:0032144|GO:0005759|GO:0010039|GO:0030170|GO:0009450|GO:0007626|GO:0042135|GO:0007620|GO:0070062|GO:0035094	GO:0030170=pyridoxal phosphate binding|GO:0042803=protein homodimerization activity|GO:0003867=4-aminobutyrate transaminase activity|GO:0047298=(S)-3-amino-2-methylpropionate transaminase activity|GO:0032145=succinate-semialdehyde dehydrogenase binding	GO:0043005=neuron projection|GO:0070062=extracellular exosome|GO:0005759=mitochondrial matrix|GO:0005739=mitochondrion|GO:0032144=4-aminobutyrate transaminase complex	GO:0009450=gamma-aminobutyric acid catabolic process|GO:0007268=synaptic transmission|GO:0045776=negative regulation of blood pressure|GO:0007620=copulation|GO:0042135=neurotransmitter catabolic process|GO:0035094=response to nicotine|GO:0007269=neurotransmitter secretion|GO:0045471=response to ethanol|GO:0001666=response to hypoxia|GO:0007626=locomotory behavior|GO:0048148=behavioral response to…	THC2608590	ENST00000396600	Hs.336768	18
ABCA1	-0.145896	Detected	0.145896	Detected	0	1.28141	Detected	0.634075	Detected	0.957744	0.114326	27.0788	32.6683	62.8	36.7423	NM_005502	ref|Homo sapiens ATP-binding cassette, sub-family A (ABC1), member 1 (ABCA1), mRNA [NM_005502]	ATP-binding cassette, sub-family A (ABC1), member 1	ref|NM_005502|ens|ENST00000374733|ens|ENST00000423487|ens|ENST00000374736	GO:0005515|GO:0008509|GO:0031267|GO:0071300|GO:0071397|GO:0034364|GO:0006497|GO:0051117|GO:0044255|GO:0019905|GO:0042632|GO:0033344|GO:0005794|GO:0010745|GO:0050702|GO:0043691|GO:0005548|GO:0038027|GO:0055098|GO:0007186|GO:0005887|GO:0042157|GO:0055091|GO:0045121|GO:0007040|GO:0009897|GO:0032367|GO:0048471|GO:0005886|GO:0017127|GO:0030819|GO:0030139|GO:0044281|GO:0010875|GO:0045332|GO:0005543|GO:…	GO:0016887=ATPase activity|GO:0005548=phospholipid transporter activity|GO:0034185=apolipoprotein binding|GO:0015485=cholesterol binding|GO:0019905=syntaxin binding|GO:0034188=apolipoprotein A-I receptor activity|GO:0034186=apolipoprotein A-I binding|GO:0005515=protein binding|GO:0008509=anion transmembrane transporter activity|GO:0031267=small GTPase binding|GO:0005524=ATP binding|GO:0017127=cho…	GO:0005794=Golgi apparatus|GO:0045335=phagocytic vesicle|GO:0005886=plasma membrane|GO:0030139=endocytic vesicle|GO:0009897=external side of plasma membrane|GO:0005887=integral component of plasma membrane|GO:0034364=high-density lipoprotein particle|GO:0048471=perinuclear region of cytoplasm|GO:0045121=membrane raft	GO:0055098=response to low-density lipoprotein particle|GO:0055091=phospholipid homeostasis|GO:0044281=small molecule metabolic process|GO:0006911=phagocytosis, engulfment|GO:0045332=phospholipid translocation|GO:0032367=intracellular cholesterol transport|GO:0032489=regulation of Cdc42 protein signal transduction|GO:0060155=platelet dense granule organization|GO:0038027=apolipoprotein A-I-mediat…	THC2499682	ENST00000374736	Hs.659274	19
ABCA10	0.246317	Detected	-0.246316	Compromised	1.2e-07	-0.312758	Compromised	0.115575	Compromised	-0.0985916	0.791126	9.38	6.57	5.49	6.77	NM_080282	ref|Homo sapiens ATP-binding cassette, sub-family A (ABC1), member 10 (ABCA10), mRNA [NM_080282]	ATP-binding cassette, sub-family A (ABC1), member 10	ref|NM_080282|ref|NR_002451|ens|ENST00000518929|ens|ENST00000523419	GO:0005215|GO:0008152|GO:0006810|GO:0016021|GO:0016887|GO:0005524	GO:0016887=ATPase activity|GO:0005524=ATP binding|GO:0005215=transporter activity	GO:0016021=integral component of membrane	GO:0008152=metabolic process|GO:0006810=transport	THC2508298	ENST00000518929	Hs.25377	10349
ABCA11P	0.0799422	Detected	-0.0799422	Detected	0	-0.497908	Detected	-0.101362	Detected	-0.299635	0.296071	77.2	68.1	44.6	53.8	NR_002451	ref|Homo sapiens ATP-binding cassette, sub-family A (ABC1), member 11, pseudogene (ABCA11P), non-coding RNA [NR_002451]	ATP-binding cassette, sub-family A (ABC1), member 11, pseudogene	ref|NR_002451|ens|ENST00000515578|ens|ENST00000507854|ens|ENST00000514396	GO:0005215|GO:0008152|GO:0006810|GO:0016021|GO:0016887|GO:0005524	GO:0016887=ATPase activity|GO:0005524=ATP binding|GO:0005215=transporter activity	GO:0016021=integral component of membrane	GO:0008152=metabolic process|GO:0006810=transport	THC2488382	ENST00000515578	Hs.745030	79963
ABCA12	-0.0526655	Detected	0.0526655	Detected	0	0.334578	Detected	0.329774	Detected	0.332176	0.0242759	1330	1410	1500	1370	NM_173076	ref|Homo sapiens ATP-binding cassette, sub-family A (ABC1), member 12 (ABCA12), transcript variant 1, mRNA [NM_173076]	ATP-binding cassette, sub-family A (ABC1), member 12	ref|NM_173076|ref|NM_015657|ref|NR_103740|ens|ENST00000272895	GO:0005515|GO:0097209|GO:0005886|GO:0005743|GO:0031424|GO:0061436|GO:0010875|GO:0005829|GO:0045055|GO:0005737|GO:0034191|GO:2000010|GO:0043129|GO:0019725|GO:0035627|GO:0048286|GO:0005102|GO:0055088|GO:0005524|GO:0072659|GO:0033700|GO:0034040|GO:0008152|GO:0006869|GO:0016021|GO:0032940|GO:0005319	GO:0034191=apolipoprotein A-I receptor binding|GO:0005524=ATP binding|GO:0034040=lipid-transporting ATPase activity|GO:0005102=receptor binding|GO:0005515=protein binding|GO:0005319=lipid transporter activity	GO:0005829=cytosol|GO:0097209=epidermal lamellar body|GO:0005886=plasma membrane|GO:0005743=mitochondrial inner membrane|GO:0005737=cytoplasm|GO:0016021=integral component of membrane	GO:0061436=establishment of skin barrier|GO:0043129=surfactant homeostasis|GO:0048286=lung alveolus development|GO:0045055=regulated secretory pathway|GO:0010875=positive regulation of cholesterol efflux|GO:0032940=secretion by cell|GO:0019725=cellular homeostasis|GO:2000010=positive regulation of protein localization to cell surface|GO:0055088=lipid homeostasis|GO:0008152=metabolic process|GO:00…	THC2475173	ENST00000272895	Hs.134585	26154
ABCA13	2.3303	Detected	-2.3303	Compromised	0	-2.29962	Compromised	-2.05049	Compromised	-2.17505	0.449705	58	2.26	2.02	2.2	NM_152701	ref|Homo sapiens ATP-binding cassette, sub-family A (ABC1), member 13 (ABCA13), mRNA [NM_152701]	ATP-binding cassette, sub-family A (ABC1), member 13	ref|NM_152701|ens|ENST00000435803|gb|AK091270|gb|AX746886	GO:0005215|GO:0008152|GO:0006810|GO:0016021|GO:0016887|GO:0005524	GO:0016887=ATPase activity|GO:0005524=ATP binding|GO:0005215=transporter activity	GO:0016021=integral component of membrane	GO:0008152=metabolic process|GO:0006810=transport	THC2472189	ENST00000435803	Hs.226568	154664
ABCA17P	-0.0597324	Compromised	0.0597324	Compromised	0	0.366635	Compromised	0.625454	Compromised	0.496045	0.0735657	1.7	1.82	1.97	2.16	NR_003574	ref|Homo sapiens ATP-binding cassette, sub-family A (ABC1), member 17, pseudogene (ABCA17P), non-coding RNA [NR_003574]	ATP-binding cassette, sub-family A (ABC1), member 17, pseudogene	ref|NR_003574|ens|ENST00000494925|ens|ENST00000469908|gb|DQ266102					THC2731745	ENST00000494925	Hs.376281	650655
ABCA2	-0.171929	Detected	0.171929	Detected	0	0.334301	Detected	0.397433	Detected	0.365867	0.171411	37.0799	46.3778	45.4148	43.4787	NM_001606	ref|Homo sapiens ATP-binding cassette, sub-family A (ABC1), member 2 (ABCA2), transcript variant 1, mRNA [NM_001606]	ATP-binding cassette, sub-family A (ABC1), member 2	ref|NM_001606|ref|NM_212533|ens|ENST00000464520|ens|ENST00000459850	GO:0042632|GO:0006629|GO:0005815|GO:0006357|GO:0042493|GO:0042626|GO:0048545|GO:0005765|GO:0055085|GO:0005524|GO:0005764|GO:0000166|GO:0016020|GO:0006810|GO:0016023|GO:0016021|GO:0032383|GO:0043190|GO:0016887|GO:0010008|GO:0005768	GO:0016887=ATPase activity|GO:0042626=ATPase activity, coupled to transmembrane movement of substances|GO:0000166=nucleotide binding|GO:0005524=ATP binding	GO:0005765=lysosomal membrane|GO:0005764=lysosome|GO:0005768=endosome|GO:0005815=microtubule organizing center|GO:0016020=membrane|GO:0016021=integral component of membrane|GO:0016023=cytoplasmic membrane-bounded vesicle|GO:0010008=endosome membrane|GO:0043190=ATP-binding cassette (ABC) transporter complex	GO:0055085=transmembrane transport|GO:0032383=regulation of intracellular cholesterol transport|GO:0048545=response to steroid hormone|GO:0042632=cholesterol homeostasis|GO:0006810=transport|GO:0006357=regulation of transcription from RNA polymerase II promoter|GO:0042493=response to drug|GO:0006629=lipid metabolic process	THC2617219	ENST00000464520	Hs.421202	20
ABCA3	-0.105443	Detected	0.105443	Detected	0	0.202782	Detected	0.0839131	Detected	0.143348	0.357965	1920	2190	2050	1730	NM_001089	ref|Homo sapiens ATP-binding cassette, sub-family A (ABC1), member 3 (ABCA3), mRNA [NM_001089]	ATP-binding cassette, sub-family A (ABC1), member 3	ref|NM_001089|ens|ENST00000301732|gb|BC140895|gb|BC146866	GO:0005215|GO:0097233|GO:0005886|GO:0097208|GO:0042493|GO:0042626|GO:0005524|GO:0005615|GO:0055085|GO:0016020|GO:0008152|GO:0006810|GO:0016021	GO:0042626=ATPase activity, coupled to transmembrane movement of substances|GO:0005215=transporter activity|GO:0005524=ATP binding	GO:0005886=plasma membrane|GO:0005615=extracellular space|GO:0097233=alveolar lamellar body membrane|GO:0016020=membrane|GO:0016021=integral component of membrane|GO:0097208=alveolar lamellar body	GO:0055085=transmembrane transport|GO:0008152=metabolic process|GO:0006810=transport|GO:0042493=response to drug	THC2462218	ENST00000301732	Hs.26630	21
ABCA4	0.816902	Compromised	-0.816902	Compromised	0	0.423545	Compromised	-0.930465	Compromised	-0.25346	0.833436	8.88	2.82	5.83	2.09	NM_000350	ref|Homo sapiens ATP-binding cassette, sub-family A (ABC1), member 4 (ABCA4), mRNA [NM_000350]	ATP-binding cassette, sub-family A (ABC1), member 4	ref|NM_000350|ens|ENST00000370225|ens|ENST00000536513|gb|U88667	GO:0005215|GO:0006649|GO:0007603|GO:0042626|GO:0045494|GO:0055085|GO:0001523|GO:0005524|GO:0045332|GO:0016020|GO:0005887|GO:0004012|GO:0006810|GO:0007601	GO:0042626=ATPase activity, coupled to transmembrane movement of substances|GO:0004012=phospholipid-translocating ATPase activity|GO:0005215=transporter activity|GO:0005524=ATP binding	GO:0005887=integral component of plasma membrane|GO:0016020=membrane	GO:0055085=transmembrane transport|GO:0007601=visual perception|GO:0006810=transport|GO:0006649=phospholipid transfer to membrane|GO:0007603=phototransduction, visible light|GO:0001523=retinoid metabolic process|GO:0045332=phospholipid translocation|GO:0045494=photoreceptor cell maintenance	THC2464953	ENST00000370225	Hs.416707	24
ABCA5	-0.051959	Detected	0.051959	Detected	0	-0.0441566	Detected	0.350316	Detected	0.15308	0.531226	203	215	176	212	NM_018672	ref|Homo sapiens ATP-binding cassette, sub-family A (ABC1), member 5 (ABCA5), transcript variant 1, mRNA [NM_018672]	ATP-binding cassette, sub-family A (ABC1), member 5	ref|NM_018672|ref|NM_172232|ens|ENST00000586601|ens|ENST00000586995	GO:0005215|GO:0033344|GO:0010745|GO:0005770|GO:0043691|GO:0005765|GO:0005524|GO:0005764|GO:0000139|GO:0008152|GO:0031902|GO:0034375|GO:0016021|GO:0016887	GO:0016887=ATPase activity|GO:0005215=transporter activity|GO:0005524=ATP binding	GO:0005770=late endosome|GO:0000139=Golgi membrane|GO:0005765=lysosomal membrane|GO:0005764=lysosome|GO:0031902=late endosome membrane|GO:0016021=integral component of membrane	GO:0034375=high-density lipoprotein particle remodeling|GO:0008152=metabolic process|GO:0043691=reverse cholesterol transport|GO:0033344=cholesterol efflux|GO:0010745=negative regulation of macrophage derived foam cell differentiation	NP710343	ENST00000586601	Hs.731824	23461
ABCA6	0.606095	Compromised	-0.606095	Compromised	2.3e-07	-0.29371	Compromised	-0.19349	Compromised	-0.2436	0.727488	4.89	2.08	2.26	2.22	NM_080284	ref|Homo sapiens ATP-binding cassette, sub-family A (ABC1), member 6 (ABCA6), mRNA [NM_080284]	ATP-binding cassette, sub-family A (ABC1), member 6	ref|NM_080284|ens|ENST00000284425|ref|XM_006721791|ref|XM_006721792	GO:0005215|GO:0008152|GO:0006810|GO:0016021|GO:0016887|GO:0005524	GO:0016887=ATPase activity|GO:0005524=ATP binding|GO:0005215=transporter activity	GO:0016021=integral component of membrane	GO:0008152=metabolic process|GO:0006810=transport	THC2470497	ENST00000284425	Hs.709514	23460
ABCA7	0.00883508	Detected	-0.00883508	Detected	0	0.164047	Detected	0.0526354	Detected	0.108341	0.19471	151	147	145	123	NM_019112	ref|Homo sapiens ATP-binding cassette, sub-family A (ABC1), member 7 (ABCA7), mRNA [NM_019112]	ATP-binding cassette, sub-family A (ABC1), member 7	ref|NM_019112|ens|ENST00000263094|ens|ENST00000433129|ref|XM_006722616	GO:0006909|GO:0005215|GO:0017121|GO:0034504|GO:0005886|GO:1900223|GO:0010875|GO:0050766|GO:0005737|GO:0016324|GO:0034380|GO:0007613|GO:0070374|GO:0043190|GO:0016887|GO:0033344|GO:0005794|GO:0009986|GO:0001891|GO:0032587|GO:0032780|GO:0005548|GO:0032781|GO:0055085|GO:0038027|GO:0005524|GO:0042985|GO:0033700|GO:0018149|GO:0000139|GO:0016021|GO:0010008|GO:0034188	GO:0016887=ATPase activity|GO:0005215=transporter activity|GO:0005524=ATP binding|GO:0005548=phospholipid transporter activity|GO:0034188=apolipoprotein A-I receptor activity	GO:0005794=Golgi apparatus|GO:0000139=Golgi membrane|GO:0001891=phagocytic cup|GO:0032587=ruffle membrane|GO:0043190=ATP-binding cassette (ABC) transporter complex|GO:0005886=plasma membrane|GO:0009986=cell surface|GO:0005737=cytoplasm|GO:0016021=integral component of membrane|GO:0010008=endosome membrane|GO:0016324=apical plasma membrane	GO:0007613=memory|GO:0017121=phospholipid scrambling|GO:0010875=positive regulation of cholesterol efflux|GO:0034504=protein localization to nucleus|GO:0034380=high-density lipoprotein particle assembly|GO:0055085=transmembrane transport|GO:0038027=apolipoprotein A-I-mediated signaling pathway|GO:0032780=negative regulation of ATPase activity|GO:0032781=positive regulation of ATPase activity|GO:1…	THC2634543	ENST00000263094	Hs.134514	10347
ABCA8	-0.0527787	Compromised	0.0527787	Compromised	0	0.347436	Compromised	0.608901	Compromised	0.478168	0.0770221	1.73989	1.84483	1.98	2.17495	NM_007168	ref|Homo sapiens ATP-binding cassette, sub-family A (ABC1), member 8 (ABCA8), transcript variant 2, mRNA [NM_007168]	ATP-binding cassette, sub-family A (ABC1), member 8	ref|NM_007168|ref|NM_001288986|ref|NM_001288985|ens|ENST00000615593	GO:0005886|GO:0008152|GO:0006810|GO:0005743|GO:0042626|GO:0016021|GO:0055085|GO:0005524	GO:0005524=ATP binding|GO:0042626=ATPase activity, coupled to transmembrane movement of substances	GO:0016021=integral component of membrane|GO:0005886=plasma membrane|GO:0005743=mitochondrial inner membrane	GO:0055085=transmembrane transport|GO:0008152=metabolic process|GO:0006810=transport	THC2463630	ENST00000430352	Hs.58351	10351
ABCA9	0.0338507	Detected	-0.0338502	Detected	2.385e-07	0.268189	Detected	-0.158954	Detected	0.0546179	0.82418	4860	4570	4930	3360	NM_080283	ref|Homo sapiens ATP-binding cassette, sub-family A (ABC1), member 9 (ABCA9), mRNA [NM_080283]	ATP-binding cassette, sub-family A (ABC1), member 9	ref|NM_080283|ens|ENST00000340001|ref|XM_005256935|ref|XM_006721633	GO:0005739|GO:0005215|GO:0008152|GO:0006810|GO:0016021|GO:0016887|GO:0005524	GO:0016887=ATPase activity|GO:0005524=ATP binding|GO:0005215=transporter activity	GO:0005739=mitochondrion|GO:0016021=integral component of membrane	GO:0008152=metabolic process|GO:0006810=transport	NP590209	ENST00000340001	Hs.131686	10350
ABCA9-AS1	-0.0274248	Compromised	0.0274253	Compromised	2.39e-07	0.213376	Compromised	0.449147	Compromised	0.331262	0.111591	2.11	2.16	2.15	2.32	NR_126414	ref|Homo sapiens ABCA9 antisense RNA 1 (ABCA9-AS1), long non-coding RNA [NR_126414]	ABCA9 antisense RNA 1	ref|NR_126414|linc|lnc-MAP2K6-3:1|gb|CB960713|tc|THC2717445					THC2717445		Hs.569827	104355297
ABCB1	-0.175864	Compromised	0.175864	Compromised	0	0.49355	Compromised	0.445748	Compromised	0.469649	0.11805	1.76819	2.22367	2.425	2.14979	NM_000927	ref|Homo sapiens ATP-binding cassette, sub-family B (MDR/TAP), member 1 (ABCB1), mRNA [NM_000927]	ATP-binding cassette, sub-family B (MDR/TAP), member 1	ref|NM_000927|ens|ENST00000416177|ens|ENST00000543898|ens|ENST00000265724	GO:0005515|GO:0005215|GO:0005886|GO:0009986|GO:0042493|GO:0072089|GO:0042626|GO:0042908|GO:0044281|GO:0055085|GO:0005524|GO:0008559|GO:0016020|GO:0000086|GO:0006855|GO:0006810|GO:0016021|GO:0070062	GO:0042626=ATPase activity, coupled to transmembrane movement of substances|GO:0008559=xenobiotic-transporting ATPase activity|GO:0005215=transporter activity|GO:0005524=ATP binding|GO:0005515=protein binding	GO:0005886=plasma membrane|GO:0009986=cell surface|GO:0070062=extracellular exosome|GO:0016020=membrane|GO:0016021=integral component of membrane	GO:0055085=transmembrane transport|GO:0006810=transport|GO:0044281=small molecule metabolic process|GO:0006855=drug transmembrane transport|GO:0000086=G2/M transition of mitotic cell cycle|GO:0042493=response to drug|GO:0072089=stem cell proliferation|GO:0042908=xenobiotic transport	THC2464142	ENST00000475929	Hs.489033	5243
ABCB10	0.0932562	Detected	-0.0932562	Detected	0	-0.489207	Detected	-0.0613401	Detected	-0.275274	0.359489	316.961	274.485	182.53	225.014	NM_012089	ref|Homo sapiens ATP-binding cassette, sub-family B (MDR/TAP), member 10 (ABCB10), mRNA [NM_012089]	ATP-binding cassette, sub-family B (MDR/TAP), member 10	ref|NM_012089|ens|ENST00000344517|ref|XM_006711754|ref|XM_006711755	GO:0005215|GO:0032592|GO:0008152|GO:0006810|GO:0005743|GO:0042626|GO:0055085|GO:0005524|GO:0042803	GO:0005524=ATP binding|GO:0042626=ATPase activity, coupled to transmembrane movement of substances|GO:0042803=protein homodimerization activity|GO:0005215=transporter activity	GO:0032592=integral component of mitochondrial membrane|GO:0005743=mitochondrial inner membrane	GO:0055085=transmembrane transport|GO:0008152=metabolic process|GO:0006810=transport	THC2463247	ENST00000344517	Hs.17614	23456
ABCB11	-0.0510669	Compromised	0.0510664	Compromised	-2.375e-07	0.350064	Compromised	0.602188	Compromised	0.476126	0.0728051	1.73	1.83	1.97	2.15	NM_003742	ref|Homo sapiens ATP-binding cassette, sub-family B (MDR/TAP), member 11 (ABCB11), mRNA [NM_003742]	ATP-binding cassette, sub-family B (MDR/TAP), member 11	ref|NM_003742|ens|ENST00000263817|ens|ENST00000618180|ref|XM_006712818	GO:0005215|GO:0005886|GO:0006699|GO:0045177|GO:0042626|GO:0015126|GO:0044281|GO:0055085|GO:0005524|GO:0046581|GO:0016020|GO:0005887|GO:0015721|GO:0008554|GO:0015722|GO:0006810|GO:0015432|GO:0035725|GO:0008206|GO:0016021|GO:0070062	GO:0015126=canalicular bile acid transmembrane transporter activity|GO:0042626=ATPase activity, coupled to transmembrane movement of substances|GO:0015432=bile acid-exporting ATPase activity|GO:0008554=sodium-exporting ATPase activity, phosphorylative mechanism|GO:0005215=transporter activity|GO:0005524=ATP binding	GO:0005886=plasma membrane|GO:0046581=intercellular canaliculus|GO:0005887=integral component of plasma membrane|GO:0070062=extracellular exosome|GO:0045177=apical part of cell|GO:0016020=membrane|GO:0016021=integral component of membrane	GO:0055085=transmembrane transport|GO:0006699=bile acid biosynthetic process|GO:0006810=transport|GO:0008206=bile acid metabolic process|GO:0044281=small molecule metabolic process|GO:0035725=sodium ion transmembrane transport|GO:0015722=canalicular bile acid transport|GO:0015721=bile acid and bile salt transport	THC2479770	ENST00000263817	Hs.658439	8647
ABCB4	0.0321648	Detected	-0.0321648	Detected	0	-0.114922	Detected	-0.0570676	Detected	-0.085995	0.185161	69.6	65.6	54.2	51.7	NM_018849	ref|Homo sapiens ATP-binding cassette, sub-family B (MDR/TAP), member 4 (ABCB4), transcript variant B, mRNA [NM_018849]	ATP-binding cassette, sub-family B (MDR/TAP), member 4	ref|NM_018849|ref|NM_000443|ref|NM_018850|ens|ENST00000265723	GO:0006629|GO:0005886|GO:0042493|GO:0042626|GO:0042908|GO:0044281|GO:0055085|GO:0005524|GO:0046581|GO:0008559|GO:0016020|GO:0005887|GO:0006855|GO:0006810|GO:0016021|GO:0044255|GO:0070062	GO:0042626=ATPase activity, coupled to transmembrane movement of substances|GO:0008559=xenobiotic-transporting ATPase activity|GO:0005524=ATP binding	GO:0005886=plasma membrane|GO:0046581=intercellular canaliculus|GO:0005887=integral component of plasma membrane|GO:0070062=extracellular exosome|GO:0016020=membrane|GO:0016021=integral component of membrane	GO:0055085=transmembrane transport|GO:0044255=cellular lipid metabolic process|GO:0006810=transport|GO:0044281=small molecule metabolic process|GO:0006855=drug transmembrane transport|GO:0042493=response to drug|GO:0006629=lipid metabolic process|GO:0042908=xenobiotic transport	THC2486286	ENST00000265723	Hs.654403	5244
ABCB5	-0.193695	Compromised	0.193695	Compromised	-2.4e-07	-0.00335407	Compromised	0.282979	Compromised	0.139812	0.620288	2.13622	2.75374	2.1019	2.349	NM_001163993	ref|Homo sapiens ATP-binding cassette, sub-family B (MDR/TAP), member 5 (ABCB5), transcript variant 4, mRNA [NM_001163993]	ATP-binding cassette, sub-family B (MDR/TAP), member 5	ref|NM_001163993|gb|BC110370|tc|THC2693924	GO:0002481|GO:0005886|GO:0015562|GO:0002485|GO:0042626|GO:0055085|GO:0002591|GO:0005524|GO:0030154|GO:0005887|GO:0008152|GO:0042391|GO:0002489|GO:0048058	GO:0042626=ATPase activity, coupled to transmembrane movement of substances|GO:0015562=efflux transmembrane transporter activity|GO:0005524=ATP binding	GO:0005886=plasma membrane|GO:0005887=integral component of plasma membrane	GO:0055085=transmembrane transport|GO:0008152=metabolic process|GO:0002481=antigen processing and presentation of exogenous protein antigen via MHC class Ib, TAP-dependent|GO:0002591=positive regulation of antigen processing and presentation of peptide antigen via MHC class I|GO:0002485=antigen processing and presentation of endogenous peptide antigen via MHC class I via ER pathway, TAP-dependent…	THC2481622	ENST00000258738	Hs.404102	340273
ABCB6	0.0433912	Detected	-0.0433907	Detected	2.39e-07	0.101602	Detected	-0.127698	Detected	-0.0130482	0.924946	5970	5540	5360	4190	NM_005689	ref|Homo sapiens ATP-binding cassette, sub-family B (MDR/TAP), member 6 (Langereis blood group) (ABCB6), mRNA [NM_005689]	ATP-binding cassette, sub-family B (MDR/TAP), member 6 (Langereis blood group)	ref|NM_005689|ens|ENST00000443805|ens|ENST00000446716|ens|ENST00000497882	GO:0015886|GO:0015439|GO:0005794|GO:0015562|GO:0005886|GO:0015232|GO:0005783|GO:0005741|GO:0005740|GO:0055085|GO:0005524|GO:0005739|GO:0006879|GO:0006779|GO:0007420|GO:0006810|GO:0043588|GO:0031307|GO:0043190|GO:0070062|GO:0020037|GO:0005768	GO:0015562=efflux transmembrane transporter activity|GO:0015232=heme transporter activity|GO:0020037=heme binding|GO:0005524=ATP binding|GO:0015439=heme-transporting ATPase activity	GO:0005794=Golgi apparatus|GO:0005783=endoplasmic reticulum|GO:0005741=mitochondrial outer membrane|GO:0005740=mitochondrial envelope|GO:0005886=plasma membrane|GO:0031307=integral component of mitochondrial outer membrane|GO:0070062=extracellular exosome|GO:0005768=endosome|GO:0005739=mitochondrion|GO:0043190=ATP-binding cassette (ABC) transporter complex	GO:0055085=transmembrane transport|GO:0007420=brain development|GO:0006810=transport|GO:0043588=skin development|GO:0006879=cellular iron ion homeostasis|GO:0006779=porphyrin-containing compound biosynthetic process|GO:0015886=heme transport	THC2610801	ENST00000443805	Hs.107911	10058
ABCB7	0.0654709	Detected	-0.0654709	Detected	0	0.0116971	Detected	0.27761	Detected	0.144654	0.431977	1300	1170	1080	1190	NM_004299	ref|Homo sapiens ATP-binding cassette, sub-family B (MDR/TAP), member 7 (ABCB7), transcript variant 1, mRNA [NM_004299]	ATP-binding cassette, sub-family B (MDR/TAP), member 7	ref|NM_004299|ref|NM_001271696|ref|NM_001271698|ref|NM_001271699	GO:0006879|GO:0005739|GO:0015886|GO:0015232|GO:0006810|GO:0005743|GO:0042626|GO:0044281|GO:0016021|GO:0055085|GO:0005524	GO:0005524=ATP binding|GO:0042626=ATPase activity, coupled to transmembrane movement of substances|GO:0015232=heme transporter activity	GO:0005739=mitochondrion|GO:0016021=integral component of membrane|GO:0005743=mitochondrial inner membrane	GO:0006879=cellular iron ion homeostasis|GO:0044281=small molecule metabolic process|GO:0055085=transmembrane transport|GO:0006810=transport|GO:0015886=heme transport	THC2632775	ENST00000490858	Hs.370480	22
ABCB8	0.0637233	Detected	-0.0637233	Detected	0	0.15272	Detected	0.00935626	Detected	0.081038	0.487112	117.326	105.85	107.61	89.2838	NM_007188	ref|Homo sapiens ATP-binding cassette, sub-family B (MDR/TAP), member 8 (ABCB8), transcript variant 2, mRNA [NM_007188]	ATP-binding cassette, sub-family B (MDR/TAP), member 8	ref|NM_007188|ref|NM_001282291|ref|NM_001282292|ref|NM_001282293	GO:0005215|GO:0005730|GO:0005743|GO:0042626|GO:0005634|GO:0005740|GO:0055085|GO:0005524|GO:0005739|GO:0016020|GO:0008152|GO:0006810|GO:0016021|GO:0043190	GO:0042626=ATPase activity, coupled to transmembrane movement of substances|GO:0005215=transporter activity|GO:0005524=ATP binding	GO:0005730=nucleolus|GO:0005740=mitochondrial envelope|GO:0005743=mitochondrial inner membrane|GO:0005634=nucleus|GO:0005739=mitochondrion|GO:0016020=membrane|GO:0016021=integral component of membrane|GO:0043190=ATP-binding cassette (ABC) transporter complex	GO:0055085=transmembrane transport|GO:0008152=metabolic process|GO:0006810=transport	THC2481609	ENST00000482309	Hs.647118	11194
ABCB9	0.0279038	Detected	-0.0279038	Detected	0	0.0421383	Detected	-0.100196	Detected	-0.0290289	0.740663	73.791	69.9622	64.2623	53.3562	ENST00000537276	ens|ATP-binding cassette, sub-family B (MDR/TAP), member 9 [Source:HGNC Symbol;Acc:HGNC:50] [ENST00000537276]	ATP-binding cassette, sub-family B (MDR/TAP), member 9	ens|ENST00000537276|ens|ENST00000426173|gb|AK027624|gb|AL833963	GO:0005515|GO:0002474|GO:0005783|GO:0030176|GO:0005765|GO:0015031|GO:0055085|GO:0005524|GO:0005764|GO:0042803|GO:0015833|GO:0022891|GO:0008152|GO:0016021|GO:0015440|GO:0005769	GO:0042803=protein homodimerization activity|GO:0015440=peptide-transporting ATPase activity|GO:0005524=ATP binding|GO:0022891=substrate-specific transmembrane transporter activity|GO:0005515=protein binding	GO:0005783=endoplasmic reticulum|GO:0005765=lysosomal membrane|GO:0005764=lysosome|GO:0005769=early endosome|GO:0030176=integral component of endoplasmic reticulum membrane|GO:0016021=integral component of membrane	GO:0055085=transmembrane transport|GO:0015031=protein transport|GO:0008152=metabolic process|GO:0002474=antigen processing and presentation of peptide antigen via MHC class I|GO:0015833=peptide transport	NP1200007	ENST00000542678	Hs.511951	23457
ABCC1	-0.0223081	Detected	0.0223081	Detected	0	-0.116253	Detected	0.0930092	Detected	-0.0116217	0.923411	72.9	74.1	58.9	62.4	NM_004996	ref|Homo sapiens ATP-binding cassette, sub-family C (CFTR/MRP), member 1 (ABCC1), mRNA [NM_004996]	ATP-binding cassette, sub-family C (CFTR/MRP), member 1	ref|NM_004996|ens|ENST00000399410|ens|ENST00000621659|ens|ENST00000399408	GO:0019369|GO:0005215|GO:0009235|GO:0005886|GO:0042493|GO:0042626|GO:0006767|GO:0044281|GO:0055085|GO:0005524|GO:0006691|GO:0016020|GO:0005887|GO:0006766|GO:0006810|GO:0016887|GO:0070062	GO:0016887=ATPase activity|GO:0042626=ATPase activity, coupled to transmembrane movement of substances|GO:0005215=transporter activity|GO:0005524=ATP binding	GO:0005886=plasma membrane|GO:0005887=integral component of plasma membrane|GO:0070062=extracellular exosome|GO:0016020=membrane	GO:0055085=transmembrane transport|GO:0006691=leukotriene metabolic process|GO:0009235=cobalamin metabolic process|GO:0006766=vitamin metabolic process|GO:0006810=transport|GO:0044281=small molecule metabolic process|GO:0006767=water-soluble vitamin metabolic process|GO:0042493=response to drug|GO:0019369=arachidonic acid metabolic process	NP236150	ENST00000399410	Hs.391464	4363
ABCC10	0.0549059	Detected	-0.0549059	Detected	0	0.152724	Detected	0.543273	Detected	0.347998	0.228376	50.0632	45.7217	46.199	55.4977	NM_033450	ref|Homo sapiens ATP-binding cassette, sub-family C (CFTR/MRP), member 10 (ABCC10), transcript variant MRP7A, mRNA [NM_033450]	ATP-binding cassette, sub-family C (CFTR/MRP), member 10	ref|NM_033450|ref|NM_001198934|ens|ENST00000372512|ens|ENST00000244533	GO:0005886|GO:0008152|GO:0042626|GO:0016021|GO:0005765|GO:0055085|GO:0005524	GO:0005524=ATP binding|GO:0042626=ATPase activity, coupled to transmembrane movement of substances	GO:0016021=integral component of membrane|GO:0005886=plasma membrane|GO:0005765=lysosomal membrane	GO:0055085=transmembrane transport|GO:0008152=metabolic process	THC2470630	ENST00000244533	Hs.55879	89845
ABCC11	0.181831	Detected	-0.181831	Detected	0	-0.195851	Detected	-0.672651	Detected	-0.434251	0.284516	67.5	51.7	44.8	29.5	NM_033151	ref|Homo sapiens ATP-binding cassette, sub-family C (CFTR/MRP), member 11 (ABCC11), transcript variant 2, mRNA [NM_033151]	ATP-binding cassette, sub-family C (CFTR/MRP), member 11	ref|NM_033151|ref|NM_032583|ref|NM_145186|ens|ENST00000394747	GO:0005886|GO:0005887|GO:0008152|GO:0015711|GO:0042626|GO:0015216|GO:0008514|GO:0015865|GO:0055085|GO:0005524|GO:0070062	GO:0005524=ATP binding|GO:0042626=ATPase activity, coupled to transmembrane movement of substances|GO:0008514=organic anion transmembrane transporter activity|GO:0015216=purine nucleotide transmembrane transporter activity	GO:0005887=integral component of plasma membrane|GO:0070062=extracellular exosome|GO:0005886=plasma membrane	GO:0055085=transmembrane transport|GO:0008152=metabolic process|GO:0015711=organic anion transport|GO:0015865=purine nucleotide transport	THC2477051	ENST00000394747	Hs.652267	85320
ABCC12	-0.0471139	Compromised	0.0471139	Compromised	0	0.354017	Compromised	0.565307	Compromised	0.459662	0.0578845	1.73	1.82	1.97	2.09	NM_033226	ref|Homo sapiens ATP-binding cassette, sub-family C (CFTR/MRP), member 12 (ABCC12), mRNA [NM_033226]	ATP-binding cassette, sub-family C (CFTR/MRP), member 12	ref|NM_033226|ens|ENST00000497206|ens|ENST00000532494|ens|ENST00000529504	GO:0005739|GO:0008152|GO:0042626|GO:0016021|GO:0055085|GO:0005524	GO:0005524=ATP binding|GO:0042626=ATPase activity, coupled to transmembrane movement of substances	GO:0005739=mitochondrion|GO:0016021=integral component of membrane	GO:0055085=transmembrane transport|GO:0008152=metabolic process	THC2610177	ENST00000497206	Hs.410111	94160
ABCC13	-0.0423546	Compromised	0.0423546	Compromised	0	0.30084	Compromised	0.501073	Compromised	0.400957	0.066281	1.91024	1.9964	2.08962	2.19998	NR_003087	ref|Homo sapiens ATP-binding cassette, sub-family C (CFTR/MRP), member 13, pseudogene (ABCC13), transcript variant A, non-coding RNA [NR_003087]	ATP-binding cassette, sub-family C (CFTR/MRP), member 13, pseudogene	ref|NR_003087|ens|ENST00000467409|gb|AY063514|tc|THC2479122	GO:0042626|GO:0016021|GO:0055085|GO:0005524	GO:0005524=ATP binding|GO:0042626=ATPase activity, coupled to transmembrane movement of substances	GO:0016021=integral component of membrane	GO:0055085=transmembrane transport	THC2479122	ENST00000467409	Hs.366575	150000
ABCC2	0.830428	Detected	-0.830428	Compromised	1.25e-07	-0.526284	Compromised	-0.339501	Compromised	-0.432892	0.656051	12.4	3.86469	4.17521	4.35493	ENST00000370434	ens|ATP-binding cassette, sub-family C (CFTR/MRP), member 2 [Source:HGNC Symbol;Acc:HGNC:53] [ENST00000370434]	ATP-binding cassette, sub-family C (CFTR/MRP), member 2	ens|ENST00000370434|gb|U66683|tc|THC2720169	GO:0005515|GO:0046685|GO:0043627|GO:0005886|GO:0009408|GO:0009986|GO:0031427|GO:0019904|GO:0042626|GO:0070327|GO:0055085|GO:0005524|GO:0046581|GO:0016324|GO:0030644|GO:0015732|GO:0005887|GO:0006855|GO:0008152|GO:0006810|GO:0008514|GO:0006979	GO:0019904=protein domain specific binding|GO:0042626=ATPase activity, coupled to transmembrane movement of substances|GO:0008514=organic anion transmembrane transporter activity|GO:0005524=ATP binding|GO:0005515=protein binding	GO:0005886=plasma membrane|GO:0009986=cell surface|GO:0046581=intercellular canaliculus|GO:0005887=integral component of plasma membrane|GO:0016324=apical plasma membrane	GO:0043627=response to estrogen|GO:0055085=transmembrane transport|GO:0008152=metabolic process|GO:0006810=transport|GO:0006979=response to oxidative stress|GO:0009408=response to heat|GO:0006855=drug transmembrane transport|GO:0031427=response to methotrexate|GO:0046685=response to arsenic-containing substance|GO:0030644=cellular chloride ion homeostasis|GO:0070327=thyroid hormone transport|GO:0…	THC2472036	ENST00000370449	Hs.368243	1244
ABCC3	0.0196531	Detected	-0.0196531	Detected	0	-0.172732	Detected	-0.18447	Detected	-0.178601	0.0129333	544.25	521.946	410.726	373.331	NM_001144070	ref|Homo sapiens ATP-binding cassette, sub-family C (CFTR/MRP), member 3 (ABCC3), transcript variant 2, mRNA [NM_001144070]	ATP-binding cassette, sub-family C (CFTR/MRP), member 3	ref|NM_001144070|ens|ENST00000427699|gb|BC046126|gb|BC050370	GO:0016020|GO:0005886|GO:0005887|GO:0015721|GO:0006810|GO:0042626|GO:0008514|GO:0008206|GO:0044281|GO:0055085|GO:0005524	GO:0005524=ATP binding|GO:0042626=ATPase activity, coupled to transmembrane movement of substances|GO:0008514=organic anion transmembrane transporter activity	GO:0005887=integral component of plasma membrane|GO:0016020=membrane|GO:0005886=plasma membrane	GO:0044281=small molecule metabolic process|GO:0055085=transmembrane transport|GO:0006810=transport|GO:0008206=bile acid metabolic process|GO:0015721=bile acid and bile salt transport	THC2482842	ENST00000503337	Hs.463421	8714
ABCC4	-0.245029	Compromised	0.245029	Compromised	-2.35e-07	0.760873	Compromised	0.544464	Compromised	0.652668	0.135118	3.28	4.54	5.68	4.48	NM_005845	ref|Homo sapiens ATP-binding cassette, sub-family C (CFTR/MRP), member 4 (ABCC4), transcript variant 1, mRNA [NM_005845]	ATP-binding cassette, sub-family C (CFTR/MRP), member 4	ref|NM_005845|ref|NM_001105515|ref|NM_001301830|ref|NM_001301829	GO:0014070|GO:0031088|GO:0005886|GO:0042493|GO:0042626|GO:0010243|GO:0030168|GO:0055085|GO:0048661|GO:0005524|GO:0008150|GO:0016323|GO:0016020|GO:0007596|GO:0002576|GO:0016021|GO:0055114|GO:0016404	GO:0016404=15-hydroxyprostaglandin dehydrogenase (NAD+) activity|GO:0042626=ATPase activity, coupled to transmembrane movement of substances|GO:0005524=ATP binding	GO:0005886=plasma membrane|GO:0016020=membrane|GO:0016021=integral component of membrane|GO:0031088=platelet dense granule membrane|GO:0016323=basolateral plasma membrane	GO:0008150=biological_process|GO:0055085=transmembrane transport|GO:0014070=response to organic cyclic compound|GO:0007596=blood coagulation|GO:0048661=positive regulation of smooth muscle cell proliferation|GO:0002576=platelet degranulation|GO:0042493=response to drug|GO:0055114=oxidation-reduction process|GO:0010243=response to organonitrogen compound|GO:0030168=platelet activation	NP650495	ENST00000376887	Hs.508423	10257
ABCC5	0.0334179	Detected	-0.0334179	Detected	0	-0.304966	Detected	-0.108881	Detected	-0.206923	0.183818	615.102	578.745	419.518	440.406	NM_005688	ref|Homo sapiens ATP-binding cassette, sub-family C (CFTR/MRP), member 5 (ABCC5), transcript variant 1, mRNA [NM_005688]	ATP-binding cassette, sub-family C (CFTR/MRP), member 5	ref|NM_005688|ens|ENST00000437205|ens|ENST00000265586|ens|ENST00000334444	GO:0005886|GO:0005975|GO:0042626|GO:0044281|GO:0055085|GO:0005524|GO:0016020|GO:0005887|GO:0006810|GO:0009405|GO:0015711|GO:0030213|GO:0030212|GO:0008514|GO:0030203	GO:0042626=ATPase activity, coupled to transmembrane movement of substances|GO:0008514=organic anion transmembrane transporter activity|GO:0005524=ATP binding	GO:0005886=plasma membrane|GO:0005887=integral component of plasma membrane|GO:0016020=membrane	GO:0055085=transmembrane transport|GO:0006810=transport|GO:0009405=pathogenesis|GO:0044281=small molecule metabolic process|GO:0005975=carbohydrate metabolic process|GO:0030213=hyaluronan biosynthetic process|GO:0030212=hyaluronan metabolic process|GO:0015711=organic anion transport|GO:0030203=glycosaminoglycan metabolic process	NP086323	ENST00000437205	Hs.743953	10057
ABCC5-AS1	0.0399339	Detected	-0.0399339	Detected	0	-0.297601	Detected	-0.467009	Detected	-0.382305	0.0550888	148	138	101	82.3	NR_046570	ref|Homo sapiens ABCC5 antisense RNA 1 (ABCC5-AS1), long non-coding RNA [NR_046570]	ABCC5 antisense RNA 1	ref|NR_046570|linc|lnc-HTR3D-1:1|tc|THC2649410					THC2649410		Hs.570696	100873982
ABCC6	0.0349755	Detected	-0.0349755	Detected	0	0.972869	Detected	1.09016	Detected	1.03152	0.00435354	82.9512	77.8798	137.033	136.21	NM_001079528	ref|Homo sapiens ATP-binding cassette, sub-family C (CFTR/MRP), member 6 (ABCC6), transcript variant 2, mRNA [NM_001079528]	ATP-binding cassette, sub-family C (CFTR/MRP), member 6	ref|NM_001079528|ens|ENST00000565118|gb|BC050733|tc|THC2474680	GO:0005215|GO:0005886|GO:0006200|GO:0042493|GO:0042626|GO:0005634|GO:0055085|GO:0005524|GO:0016328|GO:0016323|GO:0016324|GO:0005789|GO:0006810|GO:0016021|GO:0007601	GO:0042626=ATPase activity, coupled to transmembrane movement of substances|GO:0005215=transporter activity|GO:0005524=ATP binding	GO:0016328=lateral plasma membrane|GO:0005886=plasma membrane|GO:0005789=endoplasmic reticulum membrane|GO:0005634=nucleus|GO:0016021=integral component of membrane|GO:0016323=basolateral plasma membrane|GO:0016324=apical plasma membrane	GO:0055085=transmembrane transport|GO:0007601=visual perception|GO:0006810=transport|GO:0042493=response to drug	THC2480873	ENST00000576204	Hs.442182	368
ABCC6P1	-0.00756526	Compromised	0.0075655	Compromised	1.192e-07	-1.79238	Compromised	1.81226	Detected	0.00993945	0.996101	9.75	9.71	2.44	27.2	NR_003569	ref|Homo sapiens ATP-binding cassette, sub-family C, member 6 pseudogene 1 (functional) (ABCC6P1), non-coding RNA [NR_003569]	ATP-binding cassette, sub-family C, member 6 pseudogene 1 (functional)	ref|NR_003569|ens|ENST00000546162|gb|BC075833|tc|THC2606670					THC2606670	ENST00000546162	Hs.13188	653190
ABCC8	-0.134495	Detected	0.134495	Detected	0	-0.685571	Detected	-0.408223	Detected	-0.546897	0.105411	38.4	45.6	22.6	25.1	NM_000352	ref|Homo sapiens ATP-binding cassette, sub-family C (CFTR/MRP), member 8 (ABCC8), transcript variant 2, mRNA [NM_000352]	ATP-binding cassette, sub-family C (CFTR/MRP), member 8	ref|NM_000352|ref|NM_001287174|ens|ENST00000525022|ens|ENST00000526168	GO:0015079|GO:0005886|GO:0005975|GO:0008281|GO:0007268|GO:0042626|GO:0044281|GO:0055085|GO:0005524|GO:0044325|GO:0007165|GO:0006112|GO:0050796|GO:0008076|GO:0006813|GO:0071805	GO:0008281=sulfonylurea receptor activity|GO:0042626=ATPase activity, coupled to transmembrane movement of substances|GO:0015079=potassium ion transmembrane transporter activity|GO:0044325=ion channel binding|GO:0005524=ATP binding	GO:0008076=voltage-gated potassium channel complex|GO:0005886=plasma membrane	GO:0055085=transmembrane transport|GO:0071805=potassium ion transmembrane transport|GO:0007165=signal transduction|GO:0006112=energy reserve metabolic process|GO:0007268=synaptic transmission|GO:0044281=small molecule metabolic process|GO:0006813=potassium ion transport|GO:0005975=carbohydrate metabolic process|GO:0050796=regulation of insulin secretion	THC2461348	ENST00000525022	Hs.54470	6833
ABCC9	-0.0524473	Compromised	0.0524473	Compromised	0	0.317095	Compromised	0.538795	Compromised	0.427945	0.0732125	1.7638	1.86933	1.96499	2.09979	NM_005691	ref|Homo sapiens ATP-binding cassette, sub-family C (CFTR/MRP), member 9 (ABCC9), transcript variant SUR2A, mRNA [NM_005691]	ATP-binding cassette, sub-family C (CFTR/MRP), member 9	ref|NM_005691|ref|NM_020297|ens|ENST00000621589|ens|ENST00000261201	GO:0005215|GO:0005886|GO:0008282|GO:0008281|GO:0042626|GO:0005267|GO:0007268|GO:0010107|GO:0015459|GO:0055085|GO:0030017|GO:0005524|GO:0044325|GO:0042383|GO:0007165|GO:0051607|GO:0008076|GO:0008152|GO:0006813	GO:0008281=sulfonylurea receptor activity|GO:0042626=ATPase activity, coupled to transmembrane movement of substances|GO:0005267=potassium channel activity|GO:0044325=ion channel binding|GO:0005215=transporter activity|GO:0005524=ATP binding|GO:0015459=potassium channel regulator activity	GO:0008282=ATP-sensitive potassium channel complex|GO:0008076=voltage-gated potassium channel complex|GO:0005886=plasma membrane|GO:0042383=sarcolemma|GO:0030017=sarcomere	GO:0055085=transmembrane transport|GO:0007165=signal transduction|GO:0008152=metabolic process|GO:0007268=synaptic transmission|GO:0006813=potassium ion transport|GO:0051607=defense response to virus|GO:0010107=potassium ion import	NP274082	ENST00000261201	Hs.732701	10060
ABCD1	0.060442	Detected	-0.060442	Detected	0	0.240697	Detected	1.46898	Detected	0.854838	0.300251	36.0861	32.7047	35.259	75.7	NM_000033	ref|Homo sapiens ATP-binding cassette, sub-family D (ALD), member 1 (ABCD1), mRNA [NM_000033]	ATP-binding cassette, sub-family D (ALD), member 1	ref|NM_000033|ens|ENST00000429313|ens|ENST00000218104|ens|ENST00000399687	GO:0005515|GO:0005215|GO:0048471|GO:0042626|GO:0044281|GO:0042803|GO:0005829|GO:0042802|GO:0015910|GO:0005739|GO:0005737|GO:0007031|GO:0015919|GO:0005779|GO:0016887|GO:0044255|GO:0005778|GO:0042760|GO:0005777|GO:0006635|GO:0005325|GO:0036109|GO:0055085|GO:0005524|GO:0043651|GO:0033559|GO:0016020|GO:0042758|GO:0033540|GO:0019899	GO:0016887=ATPase activity|GO:0005215=transporter activity|GO:0005524=ATP binding|GO:0042626=ATPase activity, coupled to transmembrane movement of substances|GO:0042802=identical protein binding|GO:0042803=protein homodimerization activity|GO:0005325=peroxisomal fatty-acyl-CoA transporter activity|GO:0005515=protein binding|GO:0019899=enzyme binding	GO:0005829=cytosol|GO:0005778=peroxisomal membrane|GO:0005777=peroxisome|GO:0048471=perinuclear region of cytoplasm|GO:0005779=integral component of peroxisomal membrane|GO:0005737=cytoplasm|GO:0005739=mitochondrion|GO:0016020=membrane	GO:0042758=long-chain fatty acid catabolic process|GO:0033540=fatty acid beta-oxidation using acyl-CoA oxidase|GO:0007031=peroxisome organization|GO:0044255=cellular lipid metabolic process|GO:0044281=small molecule metabolic process|GO:0006635=fatty acid beta-oxidation|GO:0036109=alpha-linolenic acid metabolic process|GO:0033559=unsaturated fatty acid metabolic process|GO:0055085=transmembrane t…	THC2462247	ENST00000218104	Hs.159546	215
ABCD2	-0.0637255	Compromised	0.063725	Compromised	-2.375e-07	0.323174	Compromised	1.82365	Compromised	1.07341	0.290056	1.96	2.11	2.21	5.73	NM_005164	ref|Homo sapiens ATP-binding cassette, sub-family D (ALD), member 2 (ABCD2), mRNA [NM_005164]	ATP-binding cassette, sub-family D (ALD), member 2	ref|NM_005164|gb|AJ000327|tc|THC2476335	GO:0005515|GO:0000038|GO:0006635|GO:0042626|GO:0055085|GO:0005524|GO:0042803|GO:0043231|GO:0005829|GO:0005739|GO:0032000|GO:0016021|GO:0005778|GO:0042760|GO:0005777	GO:0042626=ATPase activity, coupled to transmembrane movement of substances|GO:0042803=protein homodimerization activity|GO:0005524=ATP binding|GO:0005515=protein binding	GO:0005778=peroxisomal membrane|GO:0005777=peroxisome|GO:0043231=intracellular membrane-bounded organelle|GO:0005739=mitochondrion|GO:0016021=integral component of membrane|GO:0005829=cytosol	GO:0055085=transmembrane transport|GO:0032000=positive regulation of fatty acid beta-oxidation|GO:0042760=very long-chain fatty acid catabolic process|GO:0000038=very long-chain fatty acid metabolic process|GO:0006635=fatty acid beta-oxidation	THC2476335	ENST00000308666	Hs.117852	225
ABCD3	-0.0404108	Detected	0.0404108	Detected	0	0.0189211	Detected	0.0771868	Detected	0.048054	0.436516	102.497	106.832	92.0956	87.8727	NM_001122674	ref|Homo sapiens ATP-binding cassette, sub-family D (ALD), member 3 (ABCD3), transcript variant 2, mRNA [NM_001122674]	ATP-binding cassette, sub-family D (ALD), member 3	ref|NM_001122674|ens|ENST00000315713|gb|BC009712|tc|THC2486920	GO:0005515|GO:0006635|GO:0005782|GO:0005743|GO:0042626|GO:0055085|GO:0005524|GO:0042803|GO:0043231|GO:0005829|GO:0016020|GO:0007031|GO:0016021|GO:0016887|GO:0042760|GO:0005778|GO:0005777	GO:0016887=ATPase activity|GO:0042626=ATPase activity, coupled to transmembrane movement of substances|GO:0042803=protein homodimerization activity|GO:0005524=ATP binding|GO:0005515=protein binding	GO:0005782=peroxisomal matrix|GO:0005743=mitochondrial inner membrane|GO:0005778=peroxisomal membrane|GO:0005777=peroxisome|GO:0043231=intracellular membrane-bounded organelle|GO:0016020=membrane|GO:0016021=integral component of membrane|GO:0005829=cytosol	GO:0055085=transmembrane transport|GO:0007031=peroxisome organization|GO:0042760=very long-chain fatty acid catabolic process|GO:0006635=fatty acid beta-oxidation	THC2486920	ENST00000315713	Hs.700576	5825
ABCD4	-1.37723	Detected	1.37723	Detected	0	0.986502	Detected	1.44296	Detected	1.21473	0.475965	68.2685	454	303	381	AK125109	gb|Homo sapiens cDNA FLJ43119 fis, clone CTONG3003179. [AK125109]	ATP-binding cassette, sub-family D (ALD), member 4	gb|AK125109|tc|THC2523786	GO:0009235|GO:0006767|GO:0042626|GO:0044281|GO:0005765|GO:0005524|GO:0055085|GO:0006766|GO:0005789|GO:0016021|GO:0043190|GO:0005778|GO:0005777	GO:0042626=ATPase activity, coupled to transmembrane movement of substances|GO:0005524=ATP binding	GO:0005765=lysosomal membrane|GO:0005789=endoplasmic reticulum membrane|GO:0005778=peroxisomal membrane|GO:0005777=peroxisome|GO:0016021=integral component of membrane|GO:0043190=ATP-binding cassette (ABC) transporter complex	GO:0055085=transmembrane transport|GO:0009235=cobalamin metabolic process|GO:0006766=vitamin metabolic process|GO:0044281=small molecule metabolic process|GO:0006767=water-soluble vitamin metabolic process	THC2548714	ENST00000484380		5826
ABCE1	-0.0308664	Detected	0.0308664	Detected	0	-0.270826	Detected	0.262099	Detected	-0.00436378	0.988498	943.864	970.852	689.195	913.785	NM_002940	ref|Homo sapiens ATP-binding cassette, sub-family E (OABP), member 1 (ABCE1), transcript variant 1, mRNA [NM_002940]	ATP-binding cassette, sub-family E (OABP), member 1	ref|NM_002940|ref|NM_001040876|ens|ENST00000296577|gb|BC016988	GO:0005739|GO:0005737|GO:0051536|GO:0016020|GO:0008428|GO:0016032|GO:0009615|GO:0043086|GO:0016887|GO:0005524|GO:0006401	GO:0016887=ATPase activity|GO:0005524=ATP binding|GO:0008428=ribonuclease inhibitor activity|GO:0051536=iron-sulfur cluster binding	GO:0005737=cytoplasm|GO:0005739=mitochondrion|GO:0016020=membrane	GO:0043086=negative regulation of catalytic activity|GO:0016032=viral process|GO:0009615=response to virus|GO:0006401=RNA catabolic process	THC2469886	ENST00000296577	Hs.12013	6059
ABCF1	-0.0429974	Detected	0.0429969	Detected	-2.385e-07	0.167015	Detected	-0.383595	Detected	-0.10829	0.735019	3910	4090	3900	2440	NM_001025091	ref|Homo sapiens ATP-binding cassette, sub-family F (GCN20), member 1 (ABCF1), transcript variant 1, mRNA [NM_001025091]	ATP-binding cassette, sub-family F (GCN20), member 1	ref|NM_001025091|ref|NM_001090|ens|ENST00000376545|ens|ENST00000383588	GO:0005515|GO:0042254|GO:0045727|GO:0008494|GO:0005635|GO:0005524|GO:0006412|GO:0006413|GO:0005737|GO:0006954|GO:0016020|GO:0042788|GO:0043022|GO:0005840|GO:0005654|GO:0016887|GO:0008135	GO:0016887=ATPase activity|GO:0008494=translation activator activity|GO:0008135=translation factor activity, RNA binding|GO:0005524=ATP binding|GO:0005515=protein binding|GO:0043022=ribosome binding	GO:0005840=ribosome|GO:0042788=polysomal ribosome|GO:0005654=nucleoplasm|GO:0005635=nuclear envelope|GO:0005737=cytoplasm|GO:0016020=membrane	GO:0045727=positive regulation of translation|GO:0042254=ribosome biogenesis|GO:0006413=translational initiation|GO:0006412=translation|GO:0006954=inflammatory response	NP1176940	ENST00000376545	Hs.655285	23
ABCF2	-0.0570853	Detected	0.0570853	Detected	0	0.28926	Detected	-0.121785	Detected	0.0837371	0.732523	1350	1440	1480	1020	NM_005692	ref|Homo sapiens ATP-binding cassette, sub-family F (GCN20), member 2 (ABCF2), transcript variant 2, mRNA [NM_005692]	ATP-binding cassette, sub-family F (GCN20), member 2	ref|NM_005692|ens|ENST00000222388|ens|ENST00000465687|ref|XM_005249931	GO:0005215|GO:0016020|GO:0008152|GO:0006810|GO:0005740|GO:0043190|GO:0016887|GO:0005524	GO:0016887=ATPase activity|GO:0005524=ATP binding|GO:0005215=transporter activity	GO:0016020=membrane|GO:0005740=mitochondrial envelope|GO:0043190=ATP-binding cassette (ABC) transporter complex	GO:0008152=metabolic process|GO:0006810=transport	THC2619700	ENST00000222388	Hs.654958	10061
ABCF3	-0.0376759	Detected	0.0376754	Detected	-2.39e-07	0.333133	Detected	0.081749	Detected	0.207441	0.254694	3390	3520	3780	2910	NM_018358	ref|Homo sapiens ATP-binding cassette, sub-family F (GCN20), member 3 (ABCF3), mRNA [NM_018358]	ATP-binding cassette, sub-family F (GCN20), member 3	ref|NM_018358|ens|ENST00000468892|ens|ENST00000292808|ens|ENST00000466742	GO:0051607|GO:0016020|GO:0008152|GO:0016887|GO:0005524	GO:0016887=ATPase activity|GO:0005524=ATP binding	GO:0016020=membrane	GO:0008152=metabolic process|GO:0051607=defense response to virus	THC2763523	ENST00000468892	Hs.361323	55324
ABCG1	-0.00323224	Detected	0.00323224	Detected	0	0.0867031	Detected	-0.231659	Detected	-0.0724781	0.693591	596	590	547	402	NM_207627	ref|Homo sapiens ATP-binding cassette, sub-family G (WHITE), member 1 (ABCG1), transcript variant 5, mRNA [NM_207627]	ATP-binding cassette, sub-family G (WHITE), member 1	ref|NM_207627|ref|NM_207628|ref|NM_004915|ref|NM_207174	GO:0005515|GO:0019534|GO:0005886|GO:0033993|GO:0017127|GO:0010872|GO:0044281|GO:0042803|GO:0010875|GO:0043231|GO:0005739|GO:0005543|GO:0015485|GO:0046983|GO:0009720|GO:0008203|GO:0042987|GO:0042632|GO:0033344|GO:0006355|GO:0005794|GO:0010033|GO:0046982|GO:0010745|GO:0043691|GO:0005548|GO:0055085|GO:0005524|GO:0010887|GO:0055099|GO:0033700|GO:0043531|GO:0034374|GO:0000139|GO:0005887|GO:0034041|GO:…	GO:0005524=ATP binding|GO:0005548=phospholipid transporter activity|GO:0046982=protein heterodimerization activity|GO:0017127=cholesterol transporter activity|GO:0034041=sterol-transporting ATPase activity|GO:0042803=protein homodimerization activity|GO:0015485=cholesterol binding|GO:0046983=protein dimerization activity|GO:0043531=ADP binding|GO:0005543=phospholipid binding|GO:0005515=protein bi…	GO:0009897=external side of plasma membrane|GO:0005794=Golgi apparatus|GO:0000139=Golgi membrane|GO:0005654=nucleoplasm|GO:0005789=endoplasmic reticulum membrane|GO:0005887=integral component of plasma membrane|GO:0005768=endosome|GO:0043231=intracellular membrane-bounded organelle|GO:0005886=plasma membrane|GO:0005739=mitochondrion|GO:0055037=recycling endosome	GO:0034375=high-density lipoprotein particle remodeling|GO:0055099=response to high density lipoprotein particle|GO:0034374=low-density lipoprotein particle remodeling|GO:0008203=cholesterol metabolic process|GO:0045542=positive regulation of cholesterol biosynthetic process|GO:0042157=lipoprotein metabolic process|GO:0042632=cholesterol homeostasis|GO:0055091=phospholipid homeostasis|GO:0044281=…	THC2463214	ENST00000398437	Hs.124649	9619
ABCG2	0.51816	Compromised	-0.51816	Compromised	0	-1.1887	Compromised	0.129931	Compromised	-0.529384	0.592374	7.95	3.82	2.1	4.8	NM_004827	ref|Homo sapiens ATP-binding cassette, sub-family G (WHITE), member 2 (Junior blood group) (ABCG2), transcript variant 1, mRNA [NM_004827]	ATP-binding cassette, sub-family G (WHITE), member 2 (Junior blood group)	ref|NM_004827|ref|NM_001257386|ens|ENST00000237612|ens|ENST00000515655	GO:0005515|GO:0005215|GO:0015886|GO:0031966|GO:0005886|GO:0015232|GO:0042493|GO:0042626|GO:0042908|GO:0005634|GO:0044281|GO:0046415|GO:0055085|GO:0005524|GO:0042803|GO:0006879|GO:0008559|GO:0006855|GO:0006810|GO:0005654|GO:0016021	GO:0042626=ATPase activity, coupled to transmembrane movement of substances|GO:0042803=protein homodimerization activity|GO:0015232=heme transporter activity|GO:0008559=xenobiotic-transporting ATPase activity|GO:0005215=transporter activity|GO:0005524=ATP binding|GO:0005515=protein binding	GO:0005886=plasma membrane|GO:0005654=nucleoplasm|GO:0005634=nucleus|GO:0031966=mitochondrial membrane|GO:0016021=integral component of membrane	GO:0055085=transmembrane transport|GO:0006810=transport|GO:0046415=urate metabolic process|GO:0044281=small molecule metabolic process|GO:0006879=cellular iron ion homeostasis|GO:0006855=drug transmembrane transport|GO:0042493=response to drug|GO:0042908=xenobiotic transport|GO:0015886=heme transport	THC2478592	ENST00000237612	Hs.480218	9429
ABCG4	0.030997	Detected	-0.030997	Detected	0	-1.44268	Compromised	-0.281389	Compromised	-0.862035	0.276424	14.3	13.5	4.44	9.1	NM_022169	ref|Homo sapiens ATP-binding cassette, sub-family G (WHITE), member 4 (ABCG4), transcript variant 1, mRNA [NM_022169]	ATP-binding cassette, sub-family G (WHITE), member 4	ref|NM_022169|ref|NM_001142505|ens|ENST00000619701|gb|AJ308237	GO:0005515|GO:0033344|GO:0046982|GO:0005886|GO:0017127|GO:0008152|GO:0016021|GO:0055085|GO:0016887|GO:0005524|GO:0042803	GO:0016887=ATPase activity|GO:0005524=ATP binding|GO:0005515=protein binding|GO:0042803=protein homodimerization activity|GO:0046982=protein heterodimerization activity|GO:0017127=cholesterol transporter activity	GO:0016021=integral component of membrane|GO:0005886=plasma membrane	GO:0055085=transmembrane transport|GO:0008152=metabolic process|GO:0033344=cholesterol efflux	THC2474895	ENST00000619701	Hs.126378	64137
ABCG5	0.0780659	Compromised	-0.0780659	Compromised	0	-0.264479	Compromised	-1.03565	Compromised	-0.650063	0.240262	5.97	5.28	4.06	2.18	NM_022436	ref|Homo sapiens ATP-binding cassette, sub-family G (WHITE), member 5 (ABCG5), mRNA [NM_022436]	ATP-binding cassette, sub-family G (WHITE), member 5	ref|NM_022436|ens|ENST00000409962|ens|ENST00000486512|ens|ENST00000260645	GO:0042632|GO:0005515|GO:0007588|GO:0033344|GO:0046982|GO:0005886|GO:0007584|GO:0042493|GO:0017127|GO:0044281|GO:0055085|GO:0045796|GO:0005524|GO:0043235|GO:0030299|GO:0016324|GO:0010212|GO:0010949|GO:0015918|GO:0043190|GO:0016887	GO:0016887=ATPase activity|GO:0005524=ATP binding|GO:0005515=protein binding|GO:0046982=protein heterodimerization activity|GO:0017127=cholesterol transporter activity	GO:0043235=receptor complex|GO:0005886=plasma membrane|GO:0016324=apical plasma membrane|GO:0043190=ATP-binding cassette (ABC) transporter complex	GO:0055085=transmembrane transport|GO:0007584=response to nutrient|GO:0045796=negative regulation of intestinal cholesterol absorption|GO:0042632=cholesterol homeostasis|GO:0007588=excretion|GO:0044281=small molecule metabolic process|GO:0010949=negative regulation of intestinal phytosterol absorption|GO:0015918=sterol transport|GO:0042493=response to drug|GO:0033344=cholesterol efflux|GO:0030299…	NP1147378	ENST00000409962	Hs.132992	64240
ABCG8	-0.0479145	Compromised	0.0479145	Compromised	0	2.39911	Compromised	0.505371	Compromised	1.45224	0.265262	1.88	1.98	8.84	2.18	NM_022437	ref|Homo sapiens ATP-binding cassette, sub-family G (WHITE), member 8 (ABCG8), mRNA [NM_022437]	ATP-binding cassette, sub-family G (WHITE), member 8	ref|NM_022437|ens|ENST00000272286|ref|XM_006712075|ref|XM_005264483	GO:0042632|GO:0005515|GO:0007588|GO:0033344|GO:0046982|GO:0005886|GO:0007584|GO:0042493|GO:0017127|GO:0044281|GO:0055085|GO:0045796|GO:0005524|GO:0043235|GO:0030299|GO:0016324|GO:0015914|GO:0010949|GO:0015918|GO:0043190|GO:0016887	GO:0016887=ATPase activity|GO:0005524=ATP binding|GO:0005515=protein binding|GO:0046982=protein heterodimerization activity|GO:0017127=cholesterol transporter activity	GO:0043235=receptor complex|GO:0005886=plasma membrane|GO:0016324=apical plasma membrane|GO:0043190=ATP-binding cassette (ABC) transporter complex	GO:0055085=transmembrane transport|GO:0007584=response to nutrient|GO:0045796=negative regulation of intestinal cholesterol absorption|GO:0042632=cholesterol homeostasis|GO:0007588=excretion|GO:0044281=small molecule metabolic process|GO:0010949=negative regulation of intestinal phytosterol absorption|GO:0015918=sterol transport|GO:0042493=response to drug|GO:0015914=phospholipid transport|GO:003…	THC2481118	ENST00000272286	Hs.413931	64241
ABHD1	-0.107854	Detected	0.107854	Detected	0	-0.52802	Detected	-0.10824	Detected	-0.31813	0.310008	90	103	58	71.1	NM_032604	ref|Homo sapiens abhydrolase domain containing 1 (ABHD1), mRNA [NM_032604]	abhydrolase domain containing 1	ref|NM_032604|ens|ENST00000489120|ens|ENST00000316470|ens|ENST00000448950	GO:0052689|GO:0008150|GO:0003674|GO:0008152|GO:0016021	GO:0052689=carboxylic ester hydrolase activity|GO:0003674=molecular_function	GO:0016021=integral component of membrane	GO:0008150=biological_process|GO:0008152=metabolic process	THC2487978	ENST00000489120	Hs.375791	84696
ABHD10	-0.0501752	Compromised	0.0501752	Compromised	0	0.368351	Compromised	0.590094	Compromised	0.479223	0.0588526	1.77	1.87	2.04	2.18	NM_018394	ref|Homo sapiens abhydrolase domain containing 10 (ABHD10), transcript variant 1, mRNA [NM_018394]	abhydrolase domain containing 10	ref|NM_018394|ref|NM_001272069|ref|NR_073570|ref|NR_073571	GO:0005739|GO:0019391|GO:0004553|GO:0005829	GO:0004553=hydrolase activity, hydrolyzing O-glycosyl compounds	GO:0005739=mitochondrion|GO:0005829=cytosol	GO:0019391=glucuronoside catabolic process	THC2467493	ENST00000273359	Hs.477115	55347
ABHD11	-0.0280314	Detected	0.0280318	Detected	2.38e-07	-0.0293102	Detected	-0.310472	Detected	-0.169891	0.35769	3818.6	3912.38	3289.93	2480.99	NM_001301058	ref|Homo sapiens abhydrolase domain containing 11 (ABHD11), transcript variant 9, mRNA [NM_001301058]	abhydrolase domain containing 11	ref|NM_001301058|ref|NM_001145364|ref|NM_148912|ref|NM_148913	GO:0005739|GO:0008150|GO:0003674|GO:0016787|GO:0008152|GO:0005575	GO:0003674=molecular_function|GO:0016787=hydrolase activity	GO:0005739=mitochondrion|GO:0005575=cellular_component	GO:0008150=biological_process|GO:0008152=metabolic process	THC2483689	ENST00000497897	Hs.647045	83451
ABHD11-AS1	-0.254055	Detected	0.254055	Detected	-1.2e-07	0.218895	Detected	0.296623	Detected	0.257759	0.421531	12.7	17.8	15.2	14.7	NR_026690	ref|Homo sapiens ABHD11 antisense RNA 1 (tail to tail) (ABHD11-AS1), long non-coding RNA [NR_026690]	ABHD11 antisense RNA 1 (tail to tail)	ref|NR_026690|linc|lnc-WBSCR22-1:1|gb|BU595969							Hs.650513	171022
ABHD12	-0.0898087	Detected	0.0898087	Detected	0	0.11253	Detected	-0.618184	Detected	-0.252827	0.570815	637	711	632	349	NM_015600	ref|Homo sapiens abhydrolase domain containing 12 (ABHD12), transcript variant 2, mRNA [NM_015600]	abhydrolase domain containing 12	ref|NM_015600|ref|NM_001042472|ens|ENST00000481556|ens|ENST00000376542	GO:0006660|GO:0010996|GO:0032281|GO:0047372|GO:0007628	GO:0047372=acylglycerol lipase activity	GO:0032281=AMPA glutamate receptor complex	GO:0007628=adult walking behavior|GO:0010996=response to auditory stimulus|GO:0006660=phosphatidylserine catabolic process	THC2526851	ENST00000481556	Hs.441550	26090
ABHD12B	-0.0114126	Compromised	0.0114121	Compromised	-2.385e-07	0.333591	Compromised	0.57816	Compromised	0.455875	0.065527	1.80776	1.80997	1.98	2.14963	NM_001206673	ref|Homo sapiens abhydrolase domain containing 12B (ABHD12B), transcript variant 1, mRNA [NM_001206673]	abhydrolase domain containing 12B	ref|NM_001206673|ref|NM_181814|ens|ENST00000382029|ens|ENST00000557345	GO:0016787|GO:0008152	GO:0016787=hydrolase activity		GO:0008152=metabolic process	NP820221	ENST00000554566	Hs.271896	145447
ABHD13	0.054424	Detected	-0.054424	Detected	0	-0.19766	Compromised	0.014266	Compromised	-0.091697	0.521922	10.8	9.87	7.82	8.3	NM_032859	ref|Homo sapiens abhydrolase domain containing 13 (ABHD13), mRNA [NM_032859]	abhydrolase domain containing 13	ref|NM_032859|ens|ENST00000375898|gb|BX647428|gb|BC018608	GO:0016787|GO:0016020|GO:0008152|GO:0016021	GO:0016787=hydrolase activity	GO:0016020=membrane|GO:0016021=integral component of membrane	GO:0008152=metabolic process	THC2601478	ENST00000375898	Hs.183528	84945
ABHD14A	0.0133669	Detected	-0.0133669	Detected	0	-0.396018	Detected	-0.34798	Detected	-0.371999	0.00541571	553.231	535.203	359.2	340.309	NM_015407	ref|Homo sapiens abhydrolase domain containing 14A (ABHD14A), mRNA [NM_015407]	abhydrolase domain containing 14A	ref|NM_015407|ens|ENST00000273596|ens|ENST00000458031|gb|BC002571	GO:0005737|GO:0016787|GO:0008152|GO:0016021|GO:0070062	GO:0016787=hydrolase activity	GO:0070062=extracellular exosome|GO:0005737=cytoplasm|GO:0016021=integral component of membrane	GO:0008152=metabolic process	THC2471728	ENST00000273596	Hs.534400	25864
ABHD14B	-0.0456035	Detected	0.0456035	Detected	0	0.332885	Detected	0.108028	Detected	0.220457	0.210845	281	295	315	247	NM_032750	ref|Homo sapiens abhydrolase domain containing 14B (ABHD14B), transcript variant 1, mRNA [NM_032750]	abhydrolase domain containing 14B	ref|NM_032750|ref|NM_001146314|ref|NM_001254753|ens|ENST00000361143	GO:0005515|GO:0005737|GO:0016787|GO:0045944|GO:0008152|GO:0005730|GO:0005634|GO:0070062|GO:0005829	GO:0005515=protein binding|GO:0016787=hydrolase activity	GO:0005634=nucleus|GO:0070062=extracellular exosome|GO:0005737=cytoplasm|GO:0005829=cytosol|GO:0005730=nucleolus	GO:0008152=metabolic process|GO:0045944=positive regulation of transcription from RNA polymerase II promoter	THC2599446	ENST00000361143	Hs.420796	84836
ABHD15	0.0929198	Detected	-0.0929198	Detected	0	-0.356339	Detected	0.120867	Detected	-0.117736	0.690803	247	214	156	199	NM_198147	ref|Homo sapiens abhydrolase domain containing 15 (ABHD15), mRNA [NM_198147]	abhydrolase domain containing 15	ref|NM_198147|ens|ENST00000307201|gb|AY358212|gb|AK056717	GO:0016787|GO:0016020|GO:0008152|GO:0005576	GO:0016787=hydrolase activity	GO:0016020=membrane|GO:0005576=extracellular region	GO:0008152=metabolic process	THC2471398	ENST00000307201	Hs.106510	116236
ABHD16B	0.449384	Compromised	-0.449384	Compromised	2.3e-07	-0.364654	Compromised	-0.197251	Compromised	-0.280952	0.601411	4.2	2.22	2.06	2.12	NM_080622	ref|Homo sapiens abhydrolase domain containing 16B (ABHD16B), mRNA [NM_080622]	abhydrolase domain containing 16B	ref|NM_080622|ens|ENST00000369916|gb|BC031949|tc|THC2479060	GO:0016787|GO:0008152	GO:0016787=hydrolase activity		GO:0008152=metabolic process	THC2479060	ENST00000369916	Hs.266774	140701
ABHD17A	-0.0299718	Detected	0.0299718	Detected	0	0.14668	Detected	-0.190222	Detected	-0.0217707	0.910388	1169.02	1200.95	1139.38	826.656	NM_031213	ref|Homo sapiens abhydrolase domain containing 17A (ABHD17A), transcript variant 1, mRNA [NM_031213]	abhydrolase domain containing 17A	ref|NM_031213|ref|NM_001130111|ens|ENST00000411545|ens|ENST00000592757	GO:0005515|GO:0008150|GO:0016787|GO:0016020|GO:0008152|GO:0005576	GO:0005515=protein binding|GO:0016787=hydrolase activity	GO:0016020=membrane|GO:0005576=extracellular region	GO:0008150=biological_process|GO:0008152=metabolic process	THC2551680	ENST00000411545	Hs.465542	81926
ABHD17B	0.04179	Detected	-0.04179	Detected	0	-0.412989	Detected	0.0508494	Detected	-0.18107	0.522594	194.463	180.858	122.35	154.635	NM_001025780	ref|Homo sapiens abhydrolase domain containing 17B (ABHD17B), transcript variant 2, mRNA [NM_001025780]	abhydrolase domain containing 17B	ref|NM_001025780|ens|ENST00000333421|ref|XM_006717134|gb|BC044576	GO:0016787|GO:0016020|GO:0008152|GO:0005576	GO:0016787=hydrolase activity	GO:0016020=membrane|GO:0005576=extracellular region	GO:0008152=metabolic process	THC2484355	ENST00000377041	Hs.380389	51104
ABHD17C	0.0253432	Detected	-0.0253432	Detected	0	-0.102653	Detected	0.448288	Detected	0.172817	0.595928	1010	961	797	1070	NM_021214	ref|Homo sapiens abhydrolase domain containing 17C (ABHD17C), mRNA [NM_021214]	abhydrolase domain containing 17C	ref|NM_021214|ens|ENST00000258884|ens|ENST00000558464|ens|ENST00000559506	GO:0016787|GO:0008152	GO:0016787=hydrolase activity		GO:0008152=metabolic process	THC2464839	ENST00000258884	Hs.459072	58489
ABHD2	-0.0130901	Detected	0.0130901	Detected	0	-0.335607	Detected	-0.843752	Detected	-0.589679	0.146351	84.4	84.7	58.2	37.5	NM_007011	ref|Homo sapiens abhydrolase domain containing 2 (ABHD2), transcript variant 1, mRNA [NM_007011]	abhydrolase domain containing 2	ref|NM_007011|ref|NM_152924|ens|ENST00000352732|ens|ENST00000355100	GO:0052689|GO:0008150|GO:0003674|GO:0030336|GO:0008152|GO:0009611|GO:0016021	GO:0052689=carboxylic ester hydrolase activity|GO:0003674=molecular_function	GO:0016021=integral component of membrane	GO:0008150=biological_process|GO:0008152=metabolic process|GO:0009611=response to wounding|GO:0030336=negative regulation of cell migration	THC2491788	ENST00000352732	Hs.122337	11057
ABHD3	0.0109394	Detected	-0.0109394	Detected	0	-0.240614	Detected	-0.0131495	Detected	-0.126882	0.38241	341	331	247	265	NM_138340	ref|Homo sapiens abhydrolase domain containing 3 (ABHD3), mRNA [NM_138340]	abhydrolase domain containing 3	ref|NM_138340|ens|ENST00000577564|ens|ENST00000289119|ref|XR_243847	GO:0052689|GO:0008150|GO:0003674|GO:0008152|GO:0016021|GO:0005575	GO:0052689=carboxylic ester hydrolase activity|GO:0003674=molecular_function	GO:0016021=integral component of membrane|GO:0005575=cellular_component	GO:0008150=biological_process|GO:0008152=metabolic process	THC2687867	ENST00000577564	Hs.397978	171586
ABHD4	0.00171971	Detected	-0.00171971	Detected	0	0.444743	Detected	0.232769	Detected	0.338756	0.0855381	772	759	905	716	NM_022060	ref|Homo sapiens abhydrolase domain containing 4 (ABHD4), mRNA [NM_022060]	abhydrolase domain containing 4	ref|NM_022060|ens|ENST00000428304|ref|XR_245712|ref|XM_005267986	GO:0016042|GO:0016787	GO:0016787=hydrolase activity		GO:0016042=lipid catabolic process	THC2462099	ENST00000428304	Hs.445665	63874
ABHD5	-0.0429561	Detected	0.0429561	Detected	0	-0.0148046	Detected	-0.0801208	Detected	-0.0474627	0.471862	1740	1820	1530	1340	NM_016006	ref|Homo sapiens abhydrolase domain containing 5 (ABHD5), mRNA [NM_016006]	abhydrolase domain containing 5	ref|NM_016006|ens|ENST00000458276|gb|AF151816|gb|BC021958	GO:0005811|GO:0004806|GO:0042171|GO:0010898|GO:0005634|GO:0044281|GO:0003841|GO:0030154|GO:0043231|GO:0005829|GO:0005737|GO:0010891|GO:0006631|GO:0019433|GO:0006654|GO:0051006	GO:0003841=1-acylglycerol-3-phosphate O-acyltransferase activity|GO:0042171=lysophosphatidic acid acyltransferase activity|GO:0004806=triglyceride lipase activity	GO:0005811=lipid particle|GO:0005634=nucleus|GO:0005737=cytoplasm|GO:0043231=intracellular membrane-bounded organelle|GO:0005829=cytosol	GO:0010891=negative regulation of sequestering of triglyceride|GO:0006631=fatty acid metabolic process|GO:0006654=phosphatidic acid biosynthetic process|GO:0044281=small molecule metabolic process|GO:0030154=cell differentiation|GO:0010898=positive regulation of triglyceride catabolic process|GO:0019433=triglyceride catabolic process|GO:0051006=positive regulation of lipoprotein lipase activity	THC2464058	ENST00000458276	Hs.19385	51099
ABHD6	0.0250728	Detected	-0.0250728	Detected	0	-0.0201724	Detected	0.0811479	Detected	0.0304878	0.643648	353	336	295	290	NM_020676	ref|Homo sapiens abhydrolase domain containing 6 (ABHD6), mRNA [NM_020676]	abhydrolase domain containing 6	ref|NM_020676|ens|ENST00000478253|ens|ENST00000613521|ens|ENST00000295962	GO:0005739|GO:0030336|GO:0032281|GO:0008152|GO:0047372|GO:0060292|GO:2000124|GO:0070062	GO:0047372=acylglycerol lipase activity	GO:0032281=AMPA glutamate receptor complex|GO:0070062=extracellular exosome|GO:0005739=mitochondrion	GO:0008152=metabolic process|GO:2000124=regulation of endocannabinoid signaling pathway|GO:0060292=long term synaptic depression|GO:0030336=negative regulation of cell migration	THC2516111	ENST00000478253	Hs.476454	57406
ABHD8	0.0347707	Detected	-0.0347707	Detected	0	0.254736	Detected	0.333101	Detected	0.293918	0.0303292	460	432	462	447	NM_024527	ref|Homo sapiens abhydrolase domain containing 8 (ABHD8), mRNA [NM_024527]	abhydrolase domain containing 8	ref|NM_024527|ens|ENST00000247706|gb|AK021805|gb|BC011536	GO:0016787|GO:0008152|GO:0070062	GO:0016787=hydrolase activity	GO:0070062=extracellular exosome	GO:0008152=metabolic process	THC2467201	ENST00000247706	Hs.515664	79575
ABI1	-0.0336778	Detected	0.0336778	Detected	0	-0.570943	Detected	0.128225	Detected	-0.221359	0.592918	276	285	164	244	NM_005470	ref|Homo sapiens abl-interactor 1 (ABI1), transcript variant 1, mRNA [NM_005470]	abl-interactor 1	ref|NM_005470|ref|NM_001178116|ref|NM_001012750|ref|NM_001178119	GO:0008092|GO:0005515|GO:0031209|GO:0008285|GO:0030054|GO:0005783|GO:0061098|GO:0001756|GO:0006928|GO:0005634|GO:0030175|GO:0032403|GO:0005829|GO:0030426|GO:0005622|GO:0030296|GO:0045211|GO:0005856|GO:0070062|GO:0072673|GO:0048010|GO:0014069|GO:0018108|GO:0030027|GO:0035855|GO:0008154|GO:0045087|GO:0007169|GO:0038096	GO:0032403=protein complex binding|GO:0005515=protein binding|GO:0030296=protein tyrosine kinase activator activity|GO:0008092=cytoskeletal protein binding	GO:0014069=postsynaptic density|GO:0030426=growth cone|GO:0070062=extracellular exosome|GO:0045211=postsynaptic membrane|GO:0005829=cytosol|GO:0030027=lamellipodium|GO:0005783=endoplasmic reticulum|GO:0005622=intracellular|GO:0031209=SCAR complex|GO:0005634=nucleus|GO:0005856=cytoskeleton|GO:0030054=cell junction|GO:0030175=filopodium	GO:0018108=peptidyl-tyrosine phosphorylation|GO:0008285=negative regulation of cell proliferation|GO:0061098=positive regulation of protein tyrosine kinase activity|GO:0038096=Fc-gamma receptor signaling pathway involved in phagocytosis|GO:0035855=megakaryocyte development|GO:0008154=actin polymerization or depolymerization|GO:0007169=transmembrane receptor protein tyrosine kinase signaling pathw…	THC2462802	ENST00000346832	Hs.508148	10006
ABI2	-0.0209403	Detected	0.0209403	Detected	0	-0.148689	Detected	-0.442179	Detected	-0.295434	0.184451	68.8	69.8	54.3	40.6	NM_005759	ref|Homo sapiens abl-interactor 2 (ABI2), transcript variant 3, mRNA [NM_005759]	abl-interactor 2	ref|NM_005759|ref|NM_001282925|ref|NM_001282932|ref|NM_001282926	GO:0005515|GO:0031209|GO:0017124|GO:0006928|GO:0018108|GO:0030175|GO:0032403|GO:0003677|GO:0030027|GO:0005829|GO:0048365|GO:0005737|GO:0016601|GO:0016477|GO:0008154|GO:0007010|GO:2000601|GO:0019900|GO:0005856|GO:0070064|GO:0031625|GO:0008093	GO:0008093=cytoskeletal adaptor activity|GO:0003677=DNA binding|GO:0070064=proline-rich region binding|GO:0005515=protein binding|GO:0031625=ubiquitin protein ligase binding|GO:0048365=Rac GTPase binding|GO:0017124=SH3 domain binding|GO:0032403=protein complex binding|GO:0019900=kinase binding	GO:0031209=SCAR complex|GO:0005856=cytoskeleton|GO:0005737=cytoplasm|GO:0030175=filopodium|GO:0005829=cytosol|GO:0030027=lamellipodium	GO:0016601=Rac protein signal transduction|GO:0018108=peptidyl-tyrosine phosphorylation|GO:0007010=cytoskeleton organization|GO:0008154=actin polymerization or depolymerization|GO:0006928=movement of cell or subcellular component|GO:2000601=positive regulation of Arp2/3 complex-mediated actin nucleation|GO:0016477=cell migration	THC2570024	ENST00000261018	Hs.471156	10152
ABI3	-0.0145495	Detected	0.0145495	Detected	0	-0.0752049	Detected	-0.300694	Detected	-0.187949	0.24008	17.9	18	14.8	11.6	NM_016428	ref|Homo sapiens ABI family, member 3 (ABI3), transcript variant 1, mRNA [NM_016428]	ABI family, member 3	ref|NM_016428|ref|NM_001135186|ens|ENST00000419580|ens|ENST00000225941	GO:0030334|GO:0005622|GO:0005515|GO:0005737|GO:0016020|GO:0006928|GO:0018108|GO:0030027	GO:0005515=protein binding	GO:0005737=cytoplasm|GO:0016020=membrane|GO:0005622=intracellular|GO:0030027=lamellipodium	GO:0018108=peptidyl-tyrosine phosphorylation|GO:0006928=movement of cell or subcellular component|GO:0030334=regulation of cell migration	THC2604731	ENST00000419580	Hs.130719	51225
ABI3BP	-0.103449	Compromised	0.103448	Compromised	-2.4e-07	-0.158911	Compromised	0.0267544	Compromised	-0.0660784	0.681363	2.46577	2.80475	2.04609	2.13251	NM_015429	ref|Homo sapiens ABI family, member 3 (NESH) binding protein (ABI3BP), mRNA [NM_015429]	ABI family, member 3 (NESH) binding protein	ref|NM_015429|ens|ENST00000475896|ens|ENST00000284322|ref|XM_005247318	GO:0031012|GO:0030198|GO:0010811|GO:0005518|GO:0005614|GO:0008201|GO:0005615	GO:0005518=collagen binding|GO:0008201=heparin binding	GO:0005615=extracellular space|GO:0005614=interstitial matrix|GO:0031012=extracellular matrix	GO:0030198=extracellular matrix organization|GO:0010811=positive regulation of cell-substrate adhesion	THC2483291	ENST00000284322	Hs.477015	25890
ABL1	0.0512805	Detected	-0.0512805	Detected	0	-0.0961018	Detected	-0.455941	Detected	-0.276021	0.278087	215.586	197.882	167.85	119.86	NM_007313	ref|Homo sapiens ABL proto-oncogene 1, non-receptor tyrosine kinase (ABL1), transcript variant b, mRNA [NM_007313]	ABL proto-oncogene 1, non-receptor tyrosine kinase	ref|NM_007313|ens|ENST00000372348|gb|M14753|gb|AB209456	GO:0005515|GO:0002333|GO:0046632|GO:0050731|GO:0048538|GO:0048536|GO:0030155|GO:0030154|GO:0042692|GO:0007173|GO:0007411|GO:0030100|GO:0042127|GO:0034446|GO:0006298|GO:0043123|GO:0033690|GO:0038083|GO:0006979|GO:0043124|GO:0019905|GO:0031965|GO:0022408|GO:0000287|GO:0002322|GO:0021587|GO:0018108|GO:0031234|GO:0042770|GO:0045931|GO:0045930|GO:0045087|GO:0004515|GO:0010506|GO:0005654|GO:0038096|GO:…	GO:0008022=protein C-terminus binding|GO:0030145=manganese ion binding|GO:0019905=syntaxin binding|GO:0004672=protein kinase activity|GO:0003785=actin monomer binding|GO:0005515=protein binding|GO:0000287=magnesium ion binding|GO:0005524=ATP binding|GO:0004515=nicotinate-nucleotide adenylyltransferase activity|GO:0004713=protein tyrosine kinase activity|GO:0004715=non-membrane spanning protein ty…	GO:0015629=actin cytoskeleton|GO:0031234=extrinsic component of cytoplasmic side of plasma membrane|GO:0005829=cytosol|GO:0005634=nucleus|GO:0005730=nucleolus|GO:0005654=nucleoplasm|GO:0031252=cell leading edge|GO:0031965=nuclear membrane|GO:0048471=perinuclear region of cytoplasm|GO:0005737=cytoplasm|GO:0005739=mitochondrion	GO:0007050=cell cycle arrest|GO:0018108=peptidyl-tyrosine phosphorylation|GO:0007173=epidermal growth factor receptor signaling pathway|GO:0022408=negative regulation of cell-cell adhesion|GO:0042770=signal transduction in response to DNA damage|GO:0007411=axon guidance|GO:0002322=B cell proliferation involved in immune response|GO:0006914=autophagy|GO:0030100=regulation of endocytosis|GO:0033690…	NP523662	ENST00000318560	Hs.431048	25
ABL2	-0.101771	Detected	0.101771	Detected	0	0.119515	Detected	0.157063	Detected	0.138289	0.313205	177.558	201.499	178.494	167.881	NM_007314	ref|Homo sapiens ABL proto-oncogene 2, non-receptor tyrosine kinase (ABL2), transcript variant b, mRNA [NM_007314]	ABL proto-oncogene 2, non-receptor tyrosine kinase	ref|NM_007314|ref|NM_001168236|ref|NM_005158|ref|NM_001168237	GO:0005515|GO:0006909|GO:0051353|GO:0071300|GO:0046632|GO:2000145|GO:2000096|GO:0030155|GO:2000249|GO:0051015|GO:0007173|GO:0007411|GO:0030100|GO:0042127|GO:0050885|GO:0070374|GO:0043123|GO:0038083|GO:0051017|GO:0035640|GO:0022408|GO:0000287|GO:0021587|GO:0018108|GO:0001891|GO:0030027|GO:0031234|GO:0097062|GO:0008542|GO:0045087|GO:0010976|GO:0010506|GO:0035024|GO:0015629|GO:0007204|GO:0005829|GO:…	GO:0030145=manganese ion binding|GO:0004672=protein kinase activity|GO:0003785=actin monomer binding|GO:0051015=actin filament binding|GO:0005515=protein binding|GO:0000287=magnesium ion binding|GO:0005524=ATP binding|GO:0004713=protein tyrosine kinase activity|GO:0004715=non-membrane spanning protein tyrosine kinase activity|GO:0005102=receptor binding	GO:0043197=dendritic spine|GO:0015629=actin cytoskeleton|GO:0031234=extrinsic component of cytoplasmic side of plasma membrane|GO:0005829=cytosol|GO:0030027=lamellipodium|GO:0001891=phagocytic cup	GO:0018108=peptidyl-tyrosine phosphorylation|GO:0035640=exploration behavior|GO:0032092=positive regulation of protein binding|GO:0007173=epidermal growth factor receptor signaling pathway|GO:0022408=negative regulation of cell-cell adhesion|GO:0007411=axon guidance|GO:0008542=visual learning|GO:0010976=positive regulation of neuron projection development|GO:0030100=regulation of endocytosis|GO:2…	THC2501440	ENST00000502732	Hs.159472	27
ABLIM1	-0.0360622	Detected	0.0360622	Detected	0	-0.0964022	Detected	0.0879707	Detected	-0.00421572	0.9699	94.221	97.6156	77.9205	81.1388	NM_001003408	ref|Homo sapiens actin binding LIM protein 1 (ABLIM1), transcript variant 3, mRNA [NM_001003408]	actin binding LIM protein 1	ref|NM_001003408|ref|NM_001003407|ref|NM_002313|ref|NM_006720	GO:0005515|GO:0001725|GO:0030032|GO:0003779|GO:0015629|GO:0030027|GO:0042384|GO:0005737|GO:0007411|GO:0045944|GO:0007010|GO:0009887|GO:0008270|GO:0007601	GO:0008270=zinc ion binding|GO:0005515=protein binding|GO:0003779=actin binding	GO:0005737=cytoplasm|GO:0001725=stress fiber|GO:0015629=actin cytoskeleton|GO:0030027=lamellipodium	GO:0007010=cytoskeleton organization|GO:0007411=axon guidance|GO:0045944=positive regulation of transcription from RNA polymerase II promoter|GO:0007601=visual perception|GO:0009887=organ morphogenesis|GO:0042384=cilium assembly|GO:0030032=lamellipodium assembly	THC2610804	ENST00000369252	Hs.438236	3983
ABLIM2	-0.038914	Detected	0.038914	Detected	0	-0.260807	Detected	0.379242	Detected	0.0592172	0.871196	82.3913	85.6979	60.919	86.9965	NM_001130083	ref|Homo sapiens actin binding LIM protein family, member 2 (ABLIM2), transcript variant 1, mRNA [NM_001130083]	actin binding LIM protein family, member 2	ref|NM_001130083|ref|NM_001130084|ref|NM_001130085|ref|NM_001130086	GO:0030036|GO:0007411|GO:0045944|GO:0008270|GO:0003779|GO:0030016|GO:0015629|GO:0006351	GO:0008270=zinc ion binding|GO:0003779=actin binding	GO:0015629=actin cytoskeleton|GO:0030016=myofibril	GO:0006351=transcription, DNA-templated|GO:0007411=axon guidance|GO:0045944=positive regulation of transcription from RNA polymerase II promoter|GO:0030036=actin cytoskeleton organization	NP1277327	ENST00000514025	Hs.233404	84448
ABLIM3	0.0644817	Detected	-0.0644817	Detected	0	-0.286875	Detected	-0.393936	Detected	-0.340405	0.0556044	97.2	87.6	65.7	55.9	NM_014945	ref|Homo sapiens actin binding LIM protein family, member 3 (ABLIM3), transcript variant 2, mRNA [NM_014945]	actin binding LIM protein family, member 3	ref|NM_014945|ref|NM_001301028|ref|NM_001301015|ref|NM_001301027	GO:0042384|GO:0005737|GO:0001725|GO:0030036|GO:0007411|GO:0045944|GO:0030032|GO:0008270|GO:0003779|GO:0030027|GO:0006351	GO:0008270=zinc ion binding|GO:0003779=actin binding	GO:0005737=cytoplasm|GO:0001725=stress fiber|GO:0030027=lamellipodium	GO:0006351=transcription, DNA-templated|GO:0042384=cilium assembly|GO:0007411=axon guidance|GO:0030032=lamellipodium assembly|GO:0045944=positive regulation of transcription from RNA polymerase II promoter|GO:0030036=actin cytoskeleton organization	THC2620690	ENST00000506113	Hs.49688	22885
ABO	0.0270791	Detected	-0.0270791	Detected	0	-0.0952826	Detected	-0.596371	Detected	-0.345827	0.303605	86.1337	81.7579	68.2349	44.1813	ENST00000453660	ens|ABO blood group (transferase A, alpha 1-3-N-acetylgalactosaminyltransferase; transferase B, alpha 1-3-galactosyltransferase) [Source:HGNC Symbol;Acc:HGNC:79] [ENST00000453660]	ABO blood group (transferase A, alpha 1-3-N-acetylgalactosaminyltransferase; transferase B, alpha 1-3-galactosyltransferase)	ens|ENST00000453660|linc|lnc-OBP2B-1:1|linc|TCONS_00016890|gb|AK124587	GO:0004381|GO:0032580|GO:0004380|GO:0006486|GO:0005576|GO:0016021|GO:0046872	GO:0004380=glycoprotein-fucosylgalactoside alpha-N-acetylgalactosaminyltransferase activity|GO:0046872=metal ion binding|GO:0004381=fucosylgalactoside 3-alpha-galactosyltransferase activity	GO:0032580=Golgi cisterna membrane|GO:0016021=integral component of membrane|GO:0005576=extracellular region	GO:0006486=protein glycosylation	THC2491790	ENST00000453660	Hs.654423	28
ABR	-0.109845	Detected	0.109845	Detected	0	0.160184	Detected	4.25429	Detected	2.20724	0.394239	245.186	281.377	254.947	3990	NM_021962	ref|Homo sapiens active BCR-related (ABR), transcript variant 1, mRNA [NM_021962]	active BCR-related	ref|NM_021962|ref|NM_001159746|ref|NM_001092|ref|NM_001282149	GO:0043314|GO:0051056|GO:0048011|GO:0030336|GO:0043065|GO:0030036|GO:0042472|GO:0005886|GO:0007264|GO:0097190|GO:0032855|GO:0005829|GO:0050766|GO:0016020|GO:0007420|GO:0050728|GO:0050885|GO:0032496|GO:0005089|GO:0030675|GO:0005096	GO:0005096=GTPase activator activity|GO:0005089=Rho guanyl-nucleotide exchange factor activity|GO:0030675=GTPase activator activity	GO:0005886=plasma membrane|GO:0016020=membrane|GO:0005829=cytosol	GO:0007264=small GTPase mediated signal transduction|GO:0050728=negative regulation of inflammatory response|GO:0097190=apoptotic signaling pathway|GO:0007420=brain development|GO:0043314=negative regulation of neutrophil degranulation|GO:0048011=neurotrophin TRK receptor signaling pathway|GO:0051056=regulation of small GTPase mediated signal transduction|GO:0043065=positive regulation of apoptot…	THC2498261	ENST00000544583	Hs.159306	29
ABRA	-0.0214329	Compromised	0.0214329	Compromised	0	0.192274	Compromised	0.417305	Compromised	0.304789	0.116959	1.97	2	1.97	2.11	NM_139166	ref|Homo sapiens actin-binding Rho activating protein (ABRA), mRNA [NM_139166]	actin-binding Rho activating protein	ref|NM_139166|ens|ENST00000311955|gb|AK056976|gb|AL833422	GO:0051091|GO:0005886|GO:0045944|GO:0035025|GO:0003713|GO:0003779|GO:0015629|GO:0030017|GO:0006351|GO:0000060	GO:0003713=transcription coactivator activity|GO:0003779=actin binding	GO:0015629=actin cytoskeleton|GO:0005886=plasma membrane|GO:0030017=sarcomere	GO:0035025=positive regulation of Rho protein signal transduction|GO:0006351=transcription, DNA-templated|GO:0000060=protein import into nucleus, translocation|GO:0051091=positive regulation of sequence-specific DNA binding transcription factor activity|GO:0045944=positive regulation of transcription from RNA polymerase II promoter	THC2601291	ENST00000311955	Hs.374668	137735
ABRACL	0.0627117	Detected	-0.0627122	Detected	-2.37e-07	0.0272474	Detected	0.0928574	Detected	0.0600524	0.485511	14500	13100	12200	11700	NM_021243	ref|Homo sapiens ABRA C-terminal like (ABRACL), mRNA [NM_021243]	ABRA C-terminal like	ref|NM_021243|ens|ENST00000367660|gb|BC014953|gb|AF161398					THC2463611	ENST00000367660	Hs.600861	58527
ABT1	-0.0517619	Detected	0.0517619	Detected	0	0.00339913	Detected	0.26821	Detected	0.135805	0.440255	221	234	198	218	NM_013375	ref|Homo sapiens activator of basal transcription 1 (ABT1), mRNA [NM_013375]	activator of basal transcription 1	ref|NM_013375|ens|ENST00000274849|tc|THC2466588|tc|THC2659638	GO:0005515|GO:0005667|GO:0021522|GO:0006366|GO:0006357|GO:0000166|GO:0003713|GO:0005730|GO:0005634|GO:0003677	GO:0000166=nucleotide binding|GO:0003677=DNA binding|GO:0005515=protein binding|GO:0003713=transcription coactivator activity	GO:0005667=transcription factor complex|GO:0005634=nucleus|GO:0005730=nucleolus	GO:0021522=spinal cord motor neuron differentiation|GO:0006366=transcription from RNA polymerase II promoter|GO:0006357=regulation of transcription from RNA polymerase II promoter	THC2466588	ENST00000274849	Hs.254406	29777
ABTB1	-0.0158622	Detected	0.0158622	Detected	0	-0.405091	Detected	-0.416925	Detected	-0.411008	0.00169241	718.123	723.45	472.821	429.744	NM_032548	ref|Homo sapiens ankyrin repeat and BTB (POZ) domain containing 1 (ABTB1), transcript variant 1, mRNA [NM_032548]	ankyrin repeat and BTB (POZ) domain containing 1	ref|NM_032548|ref|NM_172027|ref|NR_033429|ens|ENST00000464431	GO:0005737|GO:0005886|GO:0005730|GO:0003746|GO:0006414	GO:0003746=translation elongation factor activity	GO:0005737=cytoplasm|GO:0005730=nucleolus|GO:0005886=plasma membrane	GO:0006414=translational elongation	NP852599	ENST00000464431	Hs.107812	80325
ABTB2	-0.0105307	Detected	0.0105307	Detected	0	0.0820396	Detected	0.132359	Detected	0.107199	0.0590582	1490	1490	1370	1300	NM_145804	ref|Homo sapiens ankyrin repeat and BTB (POZ) domain containing 2 (ABTB2), mRNA [NM_145804]	ankyrin repeat and BTB (POZ) domain containing 2	ref|NM_145804|ens|ENST00000435224|gb|AK095632|gb|AK091560	GO:0003674|GO:0046982|GO:0097237|GO:0005654|GO:0005634|GO:0005575	GO:0046982=protein heterodimerization activity|GO:0003674=molecular_function	GO:0005634=nucleus|GO:0005575=cellular_component|GO:0005654=nucleoplasm	GO:0097237=cellular response to toxic substance	THC2464560	ENST00000435224	Hs.23361	25841
ACAA1	-2.21922	Detected	2.21922	Detected	0	2.0479	Detected	2.35446	Detected	2.20118	0.426707	207.787	4440	3450	3910	ENST00000451419	ens|acetyl-CoA acyltransferase 1 [Source:HGNC Symbol;Acc:HGNC:82] [ENST00000451419]	acetyl-CoA acyltransferase 1	ens|ENST00000451419|linc|lnc-ACAA1-1:1|gb|BG533949	GO:0005515|GO:0000038|GO:0006635|GO:0016401|GO:0005782|GO:0044281|GO:0036109|GO:0033559|GO:0043231|GO:0016020|GO:0008206|GO:0033540|GO:0003988|GO:0044255|GO:0005777	GO:0005515=protein binding|GO:0003988=acetyl-CoA C-acyltransferase activity|GO:0016401=palmitoyl-CoA oxidase activity	GO:0005782=peroxisomal matrix|GO:0005777=peroxisome|GO:0043231=intracellular membrane-bounded organelle|GO:0016020=membrane	GO:0033540=fatty acid beta-oxidation using acyl-CoA oxidase|GO:0044255=cellular lipid metabolic process|GO:0000038=very long-chain fatty acid metabolic process|GO:0008206=bile acid metabolic process|GO:0044281=small molecule metabolic process|GO:0006635=fatty acid beta-oxidation|GO:0036109=alpha-linolenic acid metabolic process|GO:0033559=unsaturated fatty acid metabolic process		ENST00000451419	Hs.706310	30
ACAA2	0.0757592	Detected	-0.0757592	Detected	0	-0.338565	Detected	-0.190887	Detected	-0.264726	0.129413	2040	1810	1320	1340	NM_006111	ref|Homo sapiens acetyl-CoA acyltransferase 2 (ACAA2), mRNA [NM_006111]	acetyl-CoA acyltransferase 2	ref|NM_006111|ens|ENST00000591171|gb|AK054673|gb|AK093311	GO:0005739|GO:0005515|GO:0006695|GO:0006631|GO:0005743|GO:0071456|GO:0003988|GO:0070062	GO:0005515=protein binding|GO:0003988=acetyl-CoA C-acyltransferase activity	GO:0070062=extracellular exosome|GO:0005739=mitochondrion|GO:0005743=mitochondrial inner membrane	GO:0006695=cholesterol biosynthetic process|GO:0071456=cellular response to hypoxia|GO:0006631=fatty acid metabolic process	THC2469571	ENST00000591171	Hs.200136	10449
ACACA	0.0193059	Detected	-0.0193059	Detected	0	0.00993133	Detected	0.107575	Detected	0.0587533	0.379463	619.949	594.829	531.131	520.799	NM_198839	ref|Homo sapiens acetyl-CoA carboxylase alpha (ACACA), transcript variant 2, mRNA [NM_198839]	acetyl-CoA carboxylase alpha	ref|NM_198839|ref|NM_198834|ref|NM_198836|ens|ENST00000612007	GO:0005515|GO:0006768|GO:0006767|GO:0035338|GO:0044281|GO:0015629|GO:0046872|GO:0005829|GO:0005739|GO:0005737|GO:0001894|GO:0051289|GO:0019432|GO:0006633|GO:0003989|GO:0044255|GO:0070062|GO:0006853|GO:0055088|GO:0005730|GO:2001295|GO:0006084|GO:0005524|GO:0006112|GO:0031325|GO:0006766|GO:0004075|GO:0044268	GO:0005524=ATP binding|GO:0003989=acetyl-CoA carboxylase activity|GO:0004075=biotin carboxylase activity|GO:0005515=protein binding|GO:0046872=metal ion binding	GO:0005730=nucleolus|GO:0070062=extracellular exosome|GO:0015629=actin cytoskeleton|GO:0005829=cytosol|GO:0005737=cytoplasm|GO:0005739=mitochondrion	GO:2001295=malonyl-CoA biosynthetic process|GO:0006084=acetyl-CoA metabolic process|GO:0044255=cellular lipid metabolic process|GO:0006766=vitamin metabolic process|GO:0044281=small molecule metabolic process|GO:0051289=protein homotetramerization|GO:0035338=long-chain fatty-acyl-CoA biosynthetic process|GO:0055088=lipid homeostasis|GO:0006112=energy reserve metabolic process|GO:0044268=multicell…	NP831371	ENST00000612007	Hs.160556	31
ACACB	-0.0197787	Detected	0.0197787	Detected	0	-0.0637245	Detected	-0.434685	Detected	-0.249205	0.313283	115.77	117.264	96.8359	68.6185	NM_001093	ref|Homo sapiens acetyl-CoA carboxylase beta (ACACB), mRNA [NM_001093]	acetyl-CoA carboxylase beta	ref|NM_001093|ens|ENST00000377848|ens|ENST00000338432|ref|XR_429097	GO:0005515|GO:0014070|GO:0006768|GO:0006767|GO:0060421|GO:0005741|GO:0005634|GO:0044281|GO:0046872|GO:0005829|GO:0005739|GO:0051289|GO:0006633|GO:0003989|GO:0044255|GO:0006853|GO:0042493|GO:0046322|GO:0010884|GO:2001295|GO:0006084|GO:0005524|GO:0012505|GO:0006112|GO:0031325|GO:0006766|GO:0009374|GO:0004075	GO:0009374=biotin binding|GO:0005524=ATP binding|GO:0003989=acetyl-CoA carboxylase activity|GO:0004075=biotin carboxylase activity|GO:0005515=protein binding|GO:0046872=metal ion binding	GO:0005829=cytosol|GO:0005741=mitochondrial outer membrane|GO:0005634=nucleus|GO:0005739=mitochondrion|GO:0012505=endomembrane system	GO:2001295=malonyl-CoA biosynthetic process|GO:0060421=positive regulation of heart growth|GO:0006084=acetyl-CoA metabolic process|GO:0044255=cellular lipid metabolic process|GO:0006766=vitamin metabolic process|GO:0044281=small molecule metabolic process|GO:0051289=protein homotetramerization|GO:0046322=negative regulation of fatty acid oxidation|GO:0006112=energy reserve metabolic process|GO:00…	THC2506477	ENST00000538526	Hs.234898	32
ACAD10	-0.0232315	Detected	0.0232315	Detected	0	0.110754	Detected	-0.543199	Detected	-0.216222	0.577299	179.123	182.305	169.493	98.7117	NM_025247	ref|Homo sapiens acyl-CoA dehydrogenase family, member 10 (ACAD10), transcript variant 2, mRNA [NM_025247]	acyl-CoA dehydrogenase family, member 10	ref|NM_025247|ref|NM_001136538|ens|ENST00000547491|ens|ENST00000508303	GO:0005739|GO:0016787|GO:0050660|GO:0003995|GO:0055114|GO:0016772	GO:0003995=acyl-CoA dehydrogenase activity|GO:0050660=flavin adenine dinucleotide binding|GO:0016772=transferase activity, transferring phosphorus-containing groups|GO:0016787=hydrolase activity	GO:0005739=mitochondrion	GO:0055114=oxidation-reduction process	NP1163233	ENST00000413681	Hs.331141	80724
ACAD11	-0.0960865	Detected	0.0960867	Detected	1.2e-07	-0.46574	Compromised	0.36646	Detected	-0.0496399	0.918083	13.5	15.2	9.01	14.7	NM_032169	ref|Homo sapiens acyl-CoA dehydrogenase family, member 11 (ACAD11), mRNA [NM_032169]	acyl-CoA dehydrogenase family, member 11	ref|NM_032169|ref|NR_037804|ens|ENST00000485198|ens|ENST00000264990	GO:0017099|GO:0031966|GO:0050660|GO:0005634|GO:0070991|GO:0033539|GO:0004466|GO:0016772|GO:0005777	GO:0070991=medium-chain-acyl-CoA dehydrogenase activity|GO:0050660=flavin adenine dinucleotide binding|GO:0017099=very-long-chain-acyl-CoA dehydrogenase activity|GO:0016772=transferase activity, transferring phosphorus-containing groups|GO:0004466=long-chain-acyl-CoA dehydrogenase activity	GO:0005634=nucleus|GO:0005777=peroxisome|GO:0031966=mitochondrial membrane	GO:0033539=fatty acid beta-oxidation using acyl-CoA dehydrogenase	THC2478579	ENST00000485198	Hs.441378	84129
ACAD8	0.0719988	Detected	-0.0719988	Detected	0	-0.53143	Detected	-0.499106	Detected	-0.515268	0.0198985	92.5	82.5	52.5	49.2	NM_014384	ref|Homo sapiens acyl-CoA dehydrogenase family, member 8 (ACAD8), mRNA [NM_014384]	acyl-CoA dehydrogenase family, member 8	ref|NM_014384|ens|ENST00000531338|ens|ENST00000533387|ens|ENST00000281182	GO:0006629|GO:0034641|GO:0006355|GO:0005759|GO:0050660|GO:0006574|GO:0009083|GO:0003995|GO:0044281|GO:0006351|GO:0055114	GO:0003995=acyl-CoA dehydrogenase activity|GO:0050660=flavin adenine dinucleotide binding	GO:0005759=mitochondrial matrix	GO:0044281=small molecule metabolic process|GO:0009083=branched-chain amino acid catabolic process|GO:0006351=transcription, DNA-templated|GO:0006629=lipid metabolic process|GO:0006574=valine catabolic process|GO:0006355=regulation of transcription, DNA-templated|GO:0055114=oxidation-reduction process|GO:0034641=cellular nitrogen compound metabolic process	THC2711968	ENST00000531338	Hs.14791	27034
ACAD9	-0.0282593	Detected	0.0282598	Detected	2.385e-07	-0.0111885	Detected	-0.305314	Detected	-0.158251	0.401419	2720.57	2788.26	2373.92	1774.19	NM_014049	ref|Homo sapiens acyl-CoA dehydrogenase family, member 9 (ACAD9), transcript variant 1, mRNA [NM_014049]	acyl-CoA dehydrogenase family, member 9	ref|NM_014049|ref|NR_033426|ens|ENST00000511325|ens|ENST00000511526	GO:0005739|GO:0005515|GO:0032981|GO:0050660|GO:0005634|GO:0003995|GO:0030425|GO:0055114	GO:0003995=acyl-CoA dehydrogenase activity|GO:0005515=protein binding|GO:0050660=flavin adenine dinucleotide binding	GO:0005634=nucleus|GO:0030425=dendrite|GO:0005739=mitochondrion	GO:0055114=oxidation-reduction process|GO:0032981=mitochondrial respiratory chain complex I assembly	NP073436	ENST00000511325	Hs.567482	28976
ACADL	-0.461607	Compromised	0.461607	Compromised	0	-0.571307	Compromised	0.695538	Compromised	0.0621156	0.944048	2.44	4.56	1.95	4.3	NM_001608	ref|Homo sapiens acyl-CoA dehydrogenase, long chain (ACADL), mRNA [NM_001608]	acyl-CoA dehydrogenase, long chain	ref|NM_001608|ens|ENST00000233710|ref|XM_005246517|gb|M74096	GO:0090181|GO:0001659|GO:0006635|GO:0016401|GO:0031966|GO:0044242|GO:0050660|GO:0045717|GO:0046322|GO:0044281|GO:0019254|GO:0033539|GO:0004466|GO:0005739|GO:0005737|GO:0051289|GO:0005759|GO:0042758|GO:0003995|GO:0000062|GO:0044255|GO:0055114|GO:0042413	GO:0004466=long-chain-acyl-CoA dehydrogenase activity|GO:0003995=acyl-CoA dehydrogenase activity|GO:0050660=flavin adenine dinucleotide binding|GO:0000062=fatty-acyl-CoA binding|GO:0016401=palmitoyl-CoA oxidase activity	GO:0031966=mitochondrial membrane|GO:0005737=cytoplasm|GO:0005759=mitochondrial matrix|GO:0005739=mitochondrion	GO:0045717=negative regulation of fatty acid biosynthetic process|GO:0042758=long-chain fatty acid catabolic process|GO:0044255=cellular lipid metabolic process|GO:0042413=carnitine catabolic process|GO:0090181=regulation of cholesterol metabolic process|GO:0044281=small molecule metabolic process|GO:0006635=fatty acid beta-oxidation|GO:0033539=fatty acid beta-oxidation using acyl-CoA dehydrogena…	THC2473208	ENST00000233710	Hs.471277	33
ACADM	0.153171	Detected	-0.153171	Detected	0	-0.172896	Detected	-0.00309634	Detected	-0.0879962	0.665203	330	263	227	234	NM_000016	ref|Homo sapiens acyl-CoA dehydrogenase, C-4 to C-12 straight chain (ACADM), transcript variant 1, mRNA [NM_000016]	acyl-CoA dehydrogenase, C-4 to C-12 straight chain	ref|NM_000016|ref|NM_001286043|ref|NM_001127328|ref|NM_001286042	GO:0030424|GO:0006635|GO:0050660|GO:0005634|GO:0044281|GO:0019254|GO:0033539|GO:0042802|GO:0005739|GO:0005759|GO:0045329|GO:0051793|GO:0003995|GO:0051791|GO:0070991|GO:0044255|GO:0070062|GO:0055114	GO:0042802=identical protein binding|GO:0003995=acyl-CoA dehydrogenase activity|GO:0070991=medium-chain-acyl-CoA dehydrogenase activity|GO:0050660=flavin adenine dinucleotide binding	GO:0005634=nucleus|GO:0070062=extracellular exosome|GO:0005759=mitochondrial matrix|GO:0005739=mitochondrion|GO:0030424=axon	GO:0044255=cellular lipid metabolic process|GO:0045329=carnitine biosynthetic process|GO:0044281=small molecule metabolic process|GO:0006635=fatty acid beta-oxidation|GO:0033539=fatty acid beta-oxidation using acyl-CoA dehydrogenase|GO:0051793=medium-chain fatty acid catabolic process|GO:0019254=carnitine metabolic process, CoA-linked|GO:0051791=medium-chain fatty acid metabolic process|GO:005511…	THC2493080	ENST00000420607	Hs.445040	34
ACADS	0.0438576	Detected	-0.0438576	Detected	0	0.247454	Detected	-0.0613494	Detected	0.0930521	0.620702	71.6	66.4	71.1	52.6	NM_000017	ref|Homo sapiens acyl-CoA dehydrogenase, C-2 to C-3 short chain (ACADS), transcript variant 1, mRNA [NM_000017]	acyl-CoA dehydrogenase, C-2 to C-3 short chain	ref|NM_000017|ref|NM_001302554|ens|ENST00000242592|gb|AB527081	GO:0006635|GO:0031966|GO:0050660|GO:0004085|GO:0051384|GO:0005634|GO:0044281|GO:0033539|GO:0005739|GO:0042594|GO:0051289|GO:0005759|GO:0003995|GO:0000062|GO:0046359|GO:0044255	GO:0004085=butyryl-CoA dehydrogenase activity|GO:0003995=acyl-CoA dehydrogenase activity|GO:0050660=flavin adenine dinucleotide binding|GO:0000062=fatty-acyl-CoA binding	GO:0005634=nucleus|GO:0031966=mitochondrial membrane|GO:0005759=mitochondrial matrix|GO:0005739=mitochondrion	GO:0042594=response to starvation|GO:0046359=butyrate catabolic process|GO:0044255=cellular lipid metabolic process|GO:0044281=small molecule metabolic process|GO:0006635=fatty acid beta-oxidation|GO:0033539=fatty acid beta-oxidation using acyl-CoA dehydrogenase|GO:0051289=protein homotetramerization|GO:0051384=response to glucocorticoid	NP1199290	ENST00000242592	Hs.507076	35
ACADSB	-0.0235894	Detected	0.0235894	Detected	0	-0.41255	Detected	-0.0979149	Detected	-0.255232	0.249816	327.353	333.333	215.574	245.689	NM_001609	ref|Homo sapiens acyl-CoA dehydrogenase, short/branched chain (ACADSB), mRNA [NM_001609]	acyl-CoA dehydrogenase, short/branched chain	ref|NM_001609|ens|ENST00000541070|ens|ENST00000358776|gb|AK298638	GO:0005739|GO:0034641|GO:0005759|GO:0050660|GO:0006631|GO:0009083|GO:0003995|GO:0044281|GO:0070062|GO:0055114	GO:0003995=acyl-CoA dehydrogenase activity|GO:0050660=flavin adenine dinucleotide binding	GO:0070062=extracellular exosome|GO:0005759=mitochondrial matrix|GO:0005739=mitochondrion	GO:0044281=small molecule metabolic process|GO:0009083=branched-chain amino acid catabolic process|GO:0055114=oxidation-reduction process|GO:0034641=cellular nitrogen compound metabolic process|GO:0006631=fatty acid metabolic process	THC2625298	ENST00000541070	Hs.81934	36
[truncated: 41,626 more rows]
