# Supplementary material for: Assessing the Link between Diabetic Metabolic Dysregulation and Breast Cancer Progression
Source: Int J Mol Sci. 2023 Jul 23;24(14):11816. doi: 10.3390/ijms241411816 (PMC10380477; doi:10.3390/ijms241411816)
Supplement: Supplementary file 1 [file ijms-24-11816-s001.zip › SO_8409_Complete_data_set4.xlsx]

## Sheet: Read_Me
Genotypic Technology/(SO_8409)QF/LAB/19
Dr. Shivang
				Expression fold values are provided in terms of log base 2 (Formating of color)
This file contains the fold change for all the spots in the array
Complete Data - Set 4
Experiment Details
Set_4
Slide_Id	Sample_details	Group	Analysis_Plan
257236322271_1_3	NG+I_1	NG+I	Control
257236322271_1_4	NG+I_2
257236322271_2_3	HG+I_1	HG+I	Test
257236322271_2_4	HG+I_2
Column Header	Description
GeneName	Unique Gene ID
Fold_NG+I_1	Fold change calculated as log base 2
Flag_NG+I_1	Detected/ Compromised
Fold_NG+I_2	Fold change calculated as log base 2
Flag_NG+I_2	Detected/ Compromised
GeoMean_NG+I	Average fold change for the replicate samples
Fold_HG+I_1	Fold change calculated as log base 2
Flag_HG+I_1	Detected/ Compromised
Fold_HG+I_2	Fold change calculated as log base 2
Flag_HG+I_2	Detected/ Compromised
GeoMean_HG+I	Average fold change for the replicate samples
P_Value_HG+I	Student t-test p value
gProcessed_Signal_NG+I_1	Background subtracted signal intensity
gProcessed_Signal_NG+I_2	Background subtracted signal intensity
gProcessed_Signal_HG+I_1	Background subtracted signal intensity
gProcessed_Signal_HG+I_2	Background subtracted signal intensity
SystematicName	SystematicName
Description_I	Description_I
Description_II	Description_II
Accessions	Accessions
Gene Ontology	Gene Ontology
Molecular Function	Molecular Function
Cellular Component	Cellular Component
Biological Process	Biological Process
TIGRID	TIGRID
EnsemblID	EnsemblID
UniGeneID	UniGeneID
EntrezGeneID	EntrezGeneID

## Sheet: Complete_Data
	Control_NG+I					Test_HG+I
GeneName	Fold_NG+I_1	Flag_NG+I_1	Fold_NG+I_2	Flag_NG+I_2	GeoMean_NG+I	Fold_HG+I_1	Flag_HG+I_1	Fold_HG+I_2	Flag_HG+I_2	GeoMean_HG+I	P_Value_HG+I	gProcessed_Signal_NG+I_1	gProcessed_Signal_NG+I_2	gProcessed_Signal_HG+I_1	gProcessed_Signal_HG+I_2	SystematicName	Description_I	Description_II	Accessions	Gene Ontology	Molecular Function	Cellular Component	Biological Process	TIGRID	EnsemblID	UniGeneID	EntrezGeneID
MARCH1	0.0662298	Detected	-0.0662298	Detected	0	-0.0832276	Detected	-0.325258	Detected	-0.204243	0.276885	322.51	253.791	264.136	204.666	NM_017923	ref|Homo sapiens membrane-associated ring finger (C3HC4) 1, E3 ubiquitin protein ligase (MARCH1), transcript variant 2, mRNA [NM_017923]	membrane-associated ring finger (C3HC4) 1, E3 ubiquitin protein ligase	ref|NM_017923|ref|NM_001166373|ens|ENST00000339875|ens|ENST00000503008	GO:0042287|GO:0000209|GO:0004842|GO:0002495|GO:0005886|GO:0016874|GO:0005765|GO:0032588|GO:0005764|GO:0006955|GO:0031901|GO:0031902|GO:0005789|GO:0008270|GO:0016021|GO:0030659|GO:0005768	GO:0008270=zinc ion binding|GO:0042287=MHC protein binding|GO:0004842=ubiquitin-protein transferase activity|GO:0016874=ligase activity	GO:0005886=plasma membrane|GO:0005765=lysosomal membrane|GO:0005764=lysosome|GO:0031901=early endosome membrane|GO:0005789=endoplasmic reticulum membrane|GO:0031902=late endosome membrane|GO:0030659=cytoplasmic vesicle membrane|GO:0005768=endosome|GO:0016021=integral component of membrane|GO:0032588=trans-Golgi network membrane	GO:0000209=protein polyubiquitination|GO:0002495=antigen processing and presentation of peptide antigen via MHC class II|GO:0006955=immune response	THC2483811	ENST00000339875	Hs.592804	55016
Sep1	-0.147853	Compromised	0.147853	Compromised	0	0.663511	Compromised	0.42159	Compromised	0.542551	0.104835	1.7	1.8	2.71	2.1	NM_052838	ref|Homo sapiens septin 1 (SEPT1), mRNA [NM_052838]	septin 1	ref|NM_052838|ens|ENST00000566517|ens|ENST00000573615|ens|ENST00000572252	GO:0005515|GO:0007049|GO:0005737|GO:0005815|GO:0030496|GO:0005525|GO:0051301	GO:0005525=GTP binding|GO:0005515=protein binding	GO:0005815=microtubule organizing center|GO:0005737=cytoplasm|GO:0030496=midbody	GO:0051301=cell division|GO:0007049=cell cycle	NP1180451	ENST00000566517	Hs.632176	1731
Dec1	-0.567989	Compromised	0.567989	Compromised	0	-0.15606	Compromised	0.272684	Compromised	0.0583117	0.932238	1.63	3.09	1.97	2.43	NM_017418	ref|Homo sapiens deleted in esophageal cancer 1 (DEC1), mRNA [NM_017418]	deleted in esophageal cancer 1	ref|NM_017418|ens|ENST00000374016|gb|BC107103|gb|AB022761	GO:0008285			GO:0008285=negative regulation of cell proliferation	THC2483720	ENST00000374016	Hs.148841	50514
MARCH2	-0.411783	Detected	0.411783	Detected	0	0.417844	Detected	0.0233808	Detected	0.220613	0.676687	36.1763	55.2268	58.404	40.7167	NM_016496	ref|Homo sapiens membrane-associated ring finger (C3HC4) 2, E3 ubiquitin protein ligase (MARCH2), transcript variant 1, mRNA [NM_016496]	mitochondrial amidoxime reducing component 2	ref|NM_016496|ref|NM_001005415|ref|NM_001005416|ens|ENST00000381035	GO:0005739|GO:0043546|GO:0051410|GO:0042126|GO:0030170|GO:0008940|GO:0005743|GO:0005741|GO:0070062|GO:0055114|GO:0030151|GO:0005777	GO:0030170=pyridoxal phosphate binding|GO:0030151=molybdenum ion binding|GO:0008940=nitrate reductase activity|GO:0043546=molybdopterin cofactor binding	GO:0005777=peroxisome|GO:0070062=extracellular exosome|GO:0005739=mitochondrion|GO:0005741=mitochondrial outer membrane|GO:0005743=mitochondrial inner membrane	GO:0051410=detoxification of nitrogen compound|GO:0055114=oxidation-reduction process|GO:0042126=nitrate metabolic process	NP303386	ENST00000472447	Hs.369042	54996
SEPT2	-0.0161493	Detected	0.0161493	Detected	0	0.0698321	Detected	-0.0211046	Detected	0.0243638	0.663746	185.757	163.861	179.103	154.1	NM_001008491	ref|Homo sapiens septin 2 (SEPT2), transcript variant 1, mRNA [NM_001008491]	septin 2	ref|NM_001008491|ref|NM_001282973|ref|NM_006155|ref|NM_001282972	GO:0005515|GO:0060170|GO:0048471|GO:0045202|GO:0005634|GO:0015629|GO:0032154|GO:0031175|GO:0007224|GO:0032880|GO:0005737|GO:0000145|GO:0035869|GO:0030234|GO:0005938|GO:0070062|GO:0005819|GO:0005730|GO:0030496|GO:0002036|GO:0005525|GO:0042384|GO:0007067|GO:0032947|GO:0050790|GO:0000777|GO:0005654|GO:0051301	GO:0005525=GTP binding|GO:0032947=protein complex scaffold|GO:0005515=protein binding|GO:0030234=enzyme regulator activity	GO:0032154=cleavage furrow|GO:0000777=condensed chromosome kinetochore|GO:0045202=synapse|GO:0005730=nucleolus|GO:0005654=nucleoplasm|GO:0070062=extracellular exosome|GO:0015629=actin cytoskeleton|GO:0060170=ciliary membrane|GO:0000145=exocyst|GO:0005634=nucleus|GO:0048471=perinuclear region of cytoplasm|GO:0005737=cytoplasm|GO:0005938=cell cortex|GO:0005819=spindle|GO:0035869=ciliary transition …	GO:0051301=cell division|GO:0042384=cilium assembly|GO:0050790=regulation of catalytic activity|GO:0031175=neuron projection development|GO:0032880=regulation of protein localization|GO:0007224=smoothened signaling pathway|GO:0007067=mitotic nuclear division|GO:0002036=regulation of L-glutamate transport	THC2465756	ENST00000391973	Hs.721234	4735
MARCH3	0.292025	Detected	-0.292025	Detected	0	0.0991349	Detected	-0.0407424	Detected	0.0291963	0.931411	64.3	37	51.1	42.5	NM_178450	ref|Homo sapiens membrane-associated ring finger (C3HC4) 3, E3 ubiquitin protein ligase (MARCH3), mRNA [NM_178450]	membrane-associated ring finger (C3HC4) 3, E3 ubiquitin protein ligase	ref|NM_178450|ens|ENST00000308660|gb|AK000103|tc|THC2613510	GO:0016567|GO:0031901|GO:0016874|GO:0008270|GO:0016021|GO:0005764|GO:0030659|GO:0006897|GO:0005768	GO:0008270=zinc ion binding|GO:0016874=ligase activity	GO:0031901=early endosome membrane|GO:0030659=cytoplasmic vesicle membrane|GO:0005768=endosome|GO:0016021=integral component of membrane|GO:0005764=lysosome	GO:0006897=endocytosis|GO:0016567=protein ubiquitination	THC2464429	ENST00000506088	Hs.132441	115123
SEPT3	-0.351795	Compromised	0.351795	Compromised	0	0.64762	Compromised	0.480822	Compromised	0.564221	0.258998	2.60323	3.65697	4.72761	3.85927	NM_145733	ref|Homo sapiens septin 3 (SEPT3), transcript variant A, mRNA [NM_145733]	septin 3	ref|NM_145733|ens|ENST00000396426|gb|AB463248|gb|CU013459	GO:0003674|GO:0007049|GO:0005737|GO:0030054|GO:0045202|GO:0005856|GO:0005525|GO:0051301	GO:0005525=GTP binding|GO:0003674=molecular_function	GO:0005856=cytoskeleton|GO:0005737=cytoplasm|GO:0030054=cell junction|GO:0045202=synapse	GO:0051301=cell division|GO:0007049=cell cycle	THC2745156	ENST00000396426	Hs.120483	55964
MARCH4	-0.146707	Compromised	0.146708	Compromised	4.7e-07	0.275397	Compromised	0.421558	Compromised	0.348478	0.16737	1.75	1.85	2.13	2.16	NM_020814	ref|Homo sapiens membrane-associated ring finger (C3HC4) 4, E3 ubiquitin protein ligase (MARCH4), mRNA [NM_020814]	membrane-associated ring finger (C3HC4) 4, E3 ubiquitin protein ligase	ref|NM_020814|ens|ENST00000273067|gb|AB037820|gb|BC048793	GO:0005802|GO:0004842|GO:0016567|GO:0005795|GO:0000139|GO:0016874|GO:0008270|GO:0016021	GO:0004842=ubiquitin-protein transferase activity|GO:0008270=zinc ion binding|GO:0016874=ligase activity	GO:0005802=trans-Golgi network|GO:0016021=integral component of membrane|GO:0000139=Golgi membrane|GO:0005795=Golgi stack	GO:0016567=protein ubiquitination	THC2606222	ENST00000273067	Hs.170388	57574
SEPT4	0.162361	Compromised	-0.162361	Compromised	0	-0.566751	Compromised	0.0650616	Compromised	-0.250845	0.553229	6.04	4.16	3.31	4.7	NM_004574	ref|Homo sapiens septin 4 (SEPT4), transcript variant 1, mRNA [NM_004574]	septin 4	ref|NM_004574|ref|NM_001256782|ref|NM_001256822|ref|NM_001198713	GO:0005515|GO:0043065|GO:0097227|GO:0003924|GO:0006915|GO:2001244|GO:0042981|GO:0005634|GO:0005525|GO:0030382|GO:0005739|GO:0007049|GO:0005198|GO:0007420|GO:0008152|GO:0031398|GO:0005856|GO:0048240|GO:0051301	GO:0005198=structural molecule activity|GO:0005525=GTP binding|GO:0005515=protein binding|GO:0003924=GTPase activity	GO:0005634=nucleus|GO:0005856=cytoskeleton|GO:0097227=sperm annulus|GO:0005739=mitochondrion	GO:0030382=sperm mitochondrion organization|GO:0008152=metabolic process|GO:0042981=regulation of apoptotic process|GO:0007420=brain development|GO:0007049=cell cycle|GO:0051301=cell division|GO:0048240=sperm capacitation|GO:0043065=positive regulation of apoptotic process|GO:0006915=apoptotic process|GO:0031398=positive regulation of protein ubiquitination|GO:2001244=positive regulation of intri…	THC2659794	ENST00000412945	Hs.287518	5414
MARCH5	0.143055	Detected	-0.143055	Detected	0	-0.272141	Detected	-0.0565209	Detected	-0.164331	0.455786	229	162	156	166	NM_017824	ref|Homo sapiens membrane-associated ring finger (C3HC4) 5 (MARCH5), mRNA [NM_017824]	membrane-associated ring finger (C3HC4) 5	ref|NM_017824|ens|ENST00000358935|ref|XM_005269923|gb|BC015480	GO:0000209|GO:0005515|GO:0004842|GO:0005783|GO:0016874|GO:0090344|GO:0005741|GO:0090141|GO:0090140|GO:0051865|GO:0051020|GO:0016020|GO:0070585|GO:0005789|GO:0008270|GO:0016021	GO:0008270=zinc ion binding|GO:0004842=ubiquitin-protein transferase activity|GO:0005515=protein binding|GO:0051020=GTPase binding|GO:0016874=ligase activity	GO:0005783=endoplasmic reticulum|GO:0005741=mitochondrial outer membrane|GO:0005789=endoplasmic reticulum membrane|GO:0016020=membrane|GO:0016021=integral component of membrane	GO:0090344=negative regulation of cell aging|GO:0000209=protein polyubiquitination|GO:0090140=regulation of mitochondrial fission|GO:0090141=positive regulation of mitochondrial fission|GO:0070585=protein localization to mitochondrion|GO:0051865=protein autoubiquitination	THC2641973	ENST00000358935	Hs.573490	54708
SEPT5	-0.536356	Compromised	0.536357	Compromised	4.5e-07	-0.159403	Compromised	0.0587735	Compromised	-0.0503149	0.935135	1.67	3.03	1.97	2.1	NM_001009939	ref|Homo sapiens septin 5 (SEPT5), transcript variant 2, mRNA [NM_001009939]	septin 5	ref|NM_001009939|ref|NM_002688|ens|ENST00000406172|ens|ENST00000383045	GO:0005515|GO:0016080|GO:0005886|GO:2000300|GO:0003924|GO:0005525|GO:0008021|GO:0000910|GO:0005198|GO:0043195|GO:0008152|GO:0017157|GO:0005856|GO:0005938	GO:0005198=structural molecule activity|GO:0005525=GTP binding|GO:0005515=protein binding|GO:0003924=GTPase activity	GO:0008021=synaptic vesicle|GO:0005886=plasma membrane|GO:0005856=cytoskeleton|GO:0043195=terminal bouton|GO:0005938=cell cortex	GO:0008152=metabolic process|GO:0000910=cytokinesis|GO:0016080=synaptic vesicle targeting|GO:2000300=regulation of synaptic vesicle exocytosis|GO:0017157=regulation of exocytosis	THC2503766	ENST00000406172	Hs.728762	5413
MARCH6	-0.0444648	Detected	0.0444648	Detected	0	0.175814	Detected	0.868524	Detected	0.522169	0.273459	636.35	583.813	673.414	997.434	NM_005885	ref|Homo sapiens membrane-associated ring finger (C3HC4) 6, E3 ubiquitin protein ligase (MARCH6), transcript variant 1, mRNA [NM_005885]	membrane-associated ring finger (C3HC4) 6, E3 ubiquitin protein ligase	ref|NM_005885|ref|NM_001270660|ref|NM_001270661|ens|ENST00000274140	GO:0004842|GO:0016020|GO:0016874|GO:0030176|GO:0008270|GO:0070936|GO:0019899|GO:0031624	GO:0004842=ubiquitin-protein transferase activity|GO:0008270=zinc ion binding|GO:0031624=ubiquitin conjugating enzyme binding|GO:0016874=ligase activity|GO:0019899=enzyme binding	GO:0016020=membrane|GO:0030176=integral component of endoplasmic reticulum membrane	GO:0070936=protein K48-linked ubiquitination	THC2468759	ENST00000274140	Hs.432862	10299
SEPT6	0.475181	Detected	-0.475181	Compromised	-2.4e-07	-0.704484	Compromised	-1.28204	Compromised	-0.993261	0.215969	8.69	3.87918	3.48482	2.13991	NM_145802	ref|Homo sapiens septin 6 (SEPT6), transcript variant V, mRNA [NM_145802]	septin 6	ref|NM_145802|ref|NM_145800|ens|ENST00000460411|ens|ENST00000354228	GO:0005515|GO:0000910|GO:0005819|GO:0000777|GO:0030496|GO:0016032|GO:0043679|GO:0005525|GO:0032154|GO:0008021	GO:0005525=GTP binding|GO:0005515=protein binding	GO:0032154=cleavage furrow|GO:0008021=synaptic vesicle|GO:0005819=spindle|GO:0000777=condensed chromosome kinetochore|GO:0030496=midbody|GO:0043679=axon terminus	GO:0016032=viral process|GO:0000910=cytokinesis	NP391544	ENST00000354228	Hs.496666	23157
MARCH7	0.216963	Detected	-0.216963	Detected	0	-0.254764	Detected	0.169516	Detected	-0.0426242	0.901159	545	348	357	439	NM_022826	ref|Homo sapiens membrane-associated ring finger (C3HC4) 7, E3 ubiquitin protein ligase (MARCH7), transcript variant 2, mRNA [NM_022826]	membrane-associated ring finger (C3HC4) 7, E3 ubiquitin protein ligase	ref|NM_022826|ref|NM_001282805|ref|NM_001282807|ref|NM_001282806	GO:0016567|GO:0016874|GO:0008270	GO:0008270=zinc ion binding|GO:0016874=ligase activity		GO:0016567=protein ubiquitination	THC2462640	ENST00000409175	Hs.529272	64844
SEPT7	0.122676	Detected	-0.122676	Detected	0	-0.124527	Detected	0.0833795	Detected	-0.0205739	0.909894	828.604	602.97	634.171	671.225	NM_001011553	ref|Homo sapiens septin 7 (SEPT7), transcript variant 2, mRNA [NM_001011553]	septin 7	ref|NM_001011553|ref|NM_001788|ref|NM_001242956|ref|NR_027269	GO:0005515|GO:0005886|GO:0045202|GO:0005634|GO:0015629|GO:0032154|GO:0051291|GO:0042802|GO:0000910|GO:0005737|GO:0016324|GO:0015630|GO:0043679|GO:0005938|GO:0070062|GO:0001725|GO:0005930|GO:0005819|GO:0005730|GO:0030496|GO:0005525|GO:0007067|GO:0005198|GO:0016476|GO:0060271|GO:0000777	GO:0005198=structural molecule activity|GO:0005525=GTP binding|GO:0042802=identical protein binding|GO:0005515=protein binding	GO:0015630=microtubule cytoskeleton|GO:0032154=cleavage furrow|GO:0000777=condensed chromosome kinetochore|GO:0045202=synapse|GO:0005730=nucleolus|GO:0005930=axoneme|GO:0070062=extracellular exosome|GO:0001725=stress fiber|GO:0015629=actin cytoskeleton|GO:0005886=plasma membrane|GO:0043679=axon terminus|GO:0005634=nucleus|GO:0005737=cytoplasm|GO:0005938=cell cortex|GO:0005819=spindle|GO:0030496=m…	GO:0000910=cytokinesis|GO:0051291=protein heterooligomerization|GO:0016476=regulation of embryonic cell shape|GO:0060271=cilium morphogenesis|GO:0007067=mitotic nuclear division	THC2554020	ENST00000425198	Hs.191346	989
MARCH8	-0.316272	Detected	0.316272	Detected	0	0.516574	Detected	-0.361681	Detected	0.0774467	0.89932	27.0699	36.2	43.8	21.8358	NM_001282866	ref|Homo sapiens membrane-associated ring finger (C3HC4) 8, E3 ubiquitin protein ligase (MARCH8), transcript variant 4, mRNA [NM_001282866]	membrane-associated ring finger (C3HC4) 8, E3 ubiquitin protein ligase	ref|NM_001282866|ref|NM_145021|ref|NM_001002266|ens|ENST00000476962	GO:0000209|GO:0004842|GO:0042289|GO:0002495|GO:0016874|GO:0005765|GO:0005764|GO:0031901|GO:0045347|GO:0008270|GO:0016021|GO:0030659|GO:0005768	GO:0008270=zinc ion binding|GO:0042289=MHC class II protein binding|GO:0004842=ubiquitin-protein transferase activity|GO:0016874=ligase activity	GO:0005765=lysosomal membrane|GO:0005764=lysosome|GO:0031901=early endosome membrane|GO:0030659=cytoplasmic vesicle membrane|GO:0005768=endosome|GO:0016021=integral component of membrane	GO:0000209=protein polyubiquitination|GO:0045347=negative regulation of MHC class II biosynthetic process|GO:0002495=antigen processing and presentation of peptide antigen via MHC class II	THC2471858	ENST00000451376	Hs.499489	220972
SEPT8	0.00777388	Detected	-0.00777388	Detected	0	1.20988	Detected	0.94543	Detected	1.07766	0.0147731	54.6108	46.6021	114.137	87.0747	NM_001098811	ref|Homo sapiens septin 8 (SEPT8), transcript variant 1, mRNA [NM_001098811]	septin 8	ref|NM_001098811|ens|ENST00000378719|ref|XM_005271931|ref|XM_005271927	GO:0005515|GO:0007049|GO:0005737|GO:0005856|GO:0005525	GO:0005525=GTP binding|GO:0005515=protein binding	GO:0005856=cytoskeleton|GO:0005737=cytoplasm	GO:0007049=cell cycle	THC2530391	ENST00000378719	Hs.522057	23176
MARCH9	-0.00109506	Detected	0.00109506	Detected	0	0.049515	Detected	-0.0929906	Detected	-0.0217378	0.789151	1690	1460	1590	1320	NM_138396	ref|Homo sapiens membrane-associated ring finger (C3HC4) 9 (MARCH9), mRNA [NM_138396]	membrane-associated ring finger (C3HC4) 9	ref|NM_138396|ens|ENST00000548358|ens|ENST00000266643|gb|BC036455	GO:0005802|GO:0016567|GO:0005795|GO:0000139|GO:0016874|GO:0008270|GO:0016021|GO:0005765	GO:0008270=zinc ion binding|GO:0016874=ligase activity	GO:0005802=trans-Golgi network|GO:0016021=integral component of membrane|GO:0000139=Golgi membrane|GO:0005795=Golgi stack|GO:0005765=lysosomal membrane	GO:0016567=protein ubiquitination	THC2478012	ENST00000548358	Hs.632709	92979
SEPT9	0.0119369	Detected	-0.0119369	Detected	0	0.1975	Detected	-0.0329092	Detected	0.0822952	0.551053	2103.94	1785.06	2173.55	1697.79	NM_006640	ref|Homo sapiens septin 9 (SEPT9), transcript variant 3, mRNA [NM_006640]	septin 9	ref|NM_006640|ref|NM_001113492|ref|NM_001113493|ref|NM_001113494	GO:0005515|GO:0048471|GO:0007049|GO:0005737|GO:0001725|GO:0008152|GO:0005874|GO:0003924|GO:0015629|GO:0005525|GO:0051291|GO:0051301	GO:0005525=GTP binding|GO:0005515=protein binding|GO:0003924=GTPase activity	GO:0048471=perinuclear region of cytoplasm|GO:0005737=cytoplasm|GO:0001725=stress fiber|GO:0015629=actin cytoskeleton|GO:0005874=microtubule	GO:0051301=cell division|GO:0008152=metabolic process|GO:0051291=protein heterooligomerization|GO:0007049=cell cycle	THC2569011	ENST00000329047	Hs.440932	10801
MARCH10	0.415462	Compromised	-0.415462	Compromised	0	-0.445933	Compromised	1.06857	Compromised	0.311316	0.753031	3.98	1.93	1.99	5.21	NM_152598	ref|Homo sapiens membrane-associated ring finger (C3HC4) 10, E3 ubiquitin protein ligase (MARCH10), transcript variant 1, mRNA [NM_152598]	membrane-associated ring finger (C3HC4) 10, E3 ubiquitin protein ligase	ref|NM_152598|ref|NM_001100875|ref|NM_001288779|ens|ENST00000311269	GO:0016567|GO:0016874|GO:0008270	GO:0008270=zinc ion binding|GO:0016874=ligase activity		GO:0016567=protein ubiquitination	NP1159821	ENST00000311269	Hs.665663	162333
SEPT10	0.124143	Detected	-0.124143	Detected	0	-0.165567	Detected	0.0766828	Detected	-0.0444419	0.821719	946	687	703	762	NM_144710	ref|Homo sapiens septin 10 (SEPT10), transcript variant 1, mRNA [NM_144710]	septin 10	ref|NM_144710|ref|NM_178584|ref|NR_047585|ens|ENST00000397712	GO:0007049|GO:0005737|GO:0005856|GO:0005525|GO:0051301	GO:0005525=GTP binding	GO:0005856=cytoskeleton|GO:0005737=cytoplasm	GO:0051301=cell division|GO:0007049=cell cycle	NP1467265	ENST00000397712	Hs.469615	151011
MARCH11	-0.165712	Compromised	0.165713	Compromised	4.7e-07	0.259197	Compromised	0.509509	Compromised	0.384353	0.205408	1.64	1.78	2	2.18	NM_001102562	ref|Homo sapiens membrane-associated ring finger (C3HC4) 11 (MARCH11), mRNA [NM_001102562]	membrane-associated ring finger (C3HC4) 11	ref|NM_001102562|ens|ENST00000332432|gb|BC150514|gb|BC150513	GO:0016567|GO:0016874|GO:0008270|GO:0016021|GO:0030659	GO:0008270=zinc ion binding|GO:0016874=ligase activity	GO:0030659=cytoplasmic vesicle membrane|GO:0016021=integral component of membrane	GO:0016567=protein ubiquitination	THC2754016	ENST00000332432	Hs.662216	441061
SEPT11	0.107286	Detected	-0.107286	Detected	-4.7e-07	0.0279455	Detected	0.227485	Detected	0.127715	0.47527	3780	2810	3250	3420	NM_018243	ref|Homo sapiens septin 11 (SEPT11), mRNA [NM_018243]	septin 11	ref|NM_018243|ens|ENST00000264893|ref|XM_005263120|ref|XM_006714259	GO:0005515|GO:0030424|GO:0007049|GO:0005737|GO:0001725|GO:0030054|GO:0043197|GO:0045202|GO:0005525|GO:0051291|GO:0070062|GO:0051301	GO:0005525=GTP binding|GO:0005515=protein binding	GO:0070062=extracellular exosome|GO:0005737=cytoplasm|GO:0001725=stress fiber|GO:0043197=dendritic spine|GO:0030054=cell junction|GO:0045202=synapse|GO:0030424=axon	GO:0051301=cell division|GO:0051291=protein heterooligomerization|GO:0007049=cell cycle	THC2545449	ENST00000264893	Hs.128199	55752
SEPT12	0.451622	Detected	-0.451622	Detected	0	-0.185455	Detected	0.367062	Detected	0.0908035	0.879602	21.4	9.87	12.5	16.8	NM_144605	ref|Homo sapiens septin 12 (SEPT12), transcript variant 2, mRNA [NM_144605]	septin 12	ref|NM_144605|ref|NM_001154458|ens|ENST00000587603|ens|ENST00000268231	GO:0005515|GO:0031105|GO:0001725|GO:0048471|GO:0097227|GO:0005819|GO:0030496|GO:0005525|GO:0032154|GO:0042803|GO:0007049|GO:0015630|GO:0019003|GO:0035091|GO:0051301	GO:0042803=protein homodimerization activity|GO:0035091=phosphatidylinositol binding|GO:0005525=GTP binding|GO:0005515=protein binding|GO:0019003=GDP binding	GO:0015630=microtubule cytoskeleton|GO:0032154=cleavage furrow|GO:0048471=perinuclear region of cytoplasm|GO:0097227=sperm annulus|GO:0001725=stress fiber|GO:0005819=spindle|GO:0030496=midbody|GO:0031105=septin complex	GO:0007049=cell cycle|GO:0051301=cell division	NP1153851	ENST00000587603	Hs.126780	124404
SEPT14	0.0238845	Detected	-0.0238845	Detected	0	0.10579	Detected	-0.109243	Detected	-0.00172663	0.988915	47.5066	39.6444	45.6757	36.0603	NM_207366	ref|Homo sapiens septin 14 (SEPT14), mRNA [NM_207366]	septin 14	ref|NM_207366|ens|ENST00000388975|gb|AK126048|tc|THC2479910	GO:0005515|GO:0007049|GO:0005737|GO:0005856|GO:0005525|GO:0051301	GO:0005525=GTP binding|GO:0005515=protein binding	GO:0005856=cytoskeleton|GO:0005737=cytoplasm	GO:0051301=cell division|GO:0007049=cell cycle	THC2546252	ENST00000413839	Hs.453629	346288
SEPT15	-0.0577321	Detected	0.0577326	Detected	4.77e-07	-0.00832844	Detected	-0.0212526	Detected	-0.0147905	0.822815	5036.37	4706.34	4734.4	4299.81	NM_004261	ref|Homo sapiens 15 kDa selenoprotein (SEP15), transcript variant 1, mRNA [NM_004261]	15 kDa selenoprotein	ref|NM_004261|ref|NM_203341|ens|ENST00000616787|ens|ENST00000611507	GO:0008430|GO:0051084|GO:0005788|GO:0070062	GO:0008430=selenium binding	GO:0005788=endoplasmic reticulum lumen|GO:0070062=extracellular exosome	GO:0051084='de novo' posttranslational protein folding	THC2470152	ENST00000616787	Hs.362728	9403
A_19_P00325768	-0.0126557	Detected	0.0126553	Detected	-4.77e-07	0.0262175	Detected	0.0857897	Detected	0.0560036	0.225685	5240	4600	4890	4670	A_19_P00325768	Unknown
A_19_P00800244	-0.00324535	Detected	0.00324535	Detected	0	0.0545158	Detected	-0.496742	Detected	-0.221113	0.506629	36.7	31.8	34.7	21.7	A_19_P00800244	Unknown
A_19_P00802027	-0.0842094	Detected	0.0842094	Detected	0	0.0377502	Detected	0.0045805	Detected	0.0211654	0.828216	52300	50700	51700	46300	A_19_P00802027	Unknown
A_19_P00803499	0.100897	Detected	-0.100897	Detected	0	0.173269	Detected	-0.106135	Detected	0.0335667	0.863555	31.2	23.4	29.8	22.5	A_19_P00803499	Unknown
A_19_P00803675	-0.143622	Compromised	0.143622	Compromised	4.8e-07	0.270618	Compromised	0.464665	Compromised	0.367642	0.167972	1.71	1.8	2.07	2.17	A_19_P00803675	Unknown
A_19_P00804070	-0.0520077	Compromised	0.0520072	Compromised	-4.75e-07	0.181116	Compromised	0.38917	Compromised	0.285143	0.133777	1.92	1.78	2.05	2.17	A_19_P00804070	Unknown
A_19_P00804120	-0.0811024	Compromised	0.0811019	Compromised	-4.76e-07	-0.845535	Compromised	-0.26012	Compromised	-0.552828	0.21035	3.74	3.61	2	2.75	A_19_P00804120	Unknown
A_19_P00804924	-0.148572	Compromised	0.148573	Compromised	4.8e-07	0.26454	Compromised	1.3285	Compromised	0.796521	0.286026	1.67	1.77	2.02	3.87	A_19_P00804924	Unknown
A_19_P00805651	-0.215464	Detected	0.215465	Detected	4.7e-07	0.0273685	Detected	0.225822	Detected	0.126595	0.646939	3070	3570	3300	3470	A_19_P00805651	Unknown
A_19_P00806158	0.0399241	Detected	-0.0399246	Detected	-4.75e-07	-0.0756083	Detected	0.201786	Detected	0.0630889	0.704694	5820	4750	4880	5420	A_19_P00806158	Unknown
A_19_P00808758	0.0270562	Detected	-0.0270567	Detected	-4.77e-07	-0.0163498	Detected	-0.294147	Detected	-0.155248	0.387054	8690	7220	7660	5790	A_19_P00808758	Unknown
A_19_P00808923	0.0251946	Detected	-0.0251942	Detected	4.77e-07	0.105779	Detected	-0.00655746	Detected	0.0496106	0.504896	9640	8030	9260	7850	A_19_P00808923	Unknown
A_19_P00811234	-0.0917482	Detected	0.0917482	Detected	0	0.132587	Detected	0.295096	Detected	0.213841	0.22313	147	144	156	160	A_19_P00811234	Unknown
A_19_P00812701	0.0890527	Detected	-0.0890527	Detected	0	-0.0303502	Detected	-0.118677	Detected	-0.0745137	0.531665	74.5	56.8	62.3	53.7	A_19_P00812701	Unknown
A_21_P0000465	0.390533	Compromised	-0.390533	Compromised	0	0.190001	Compromised	-0.0517483	Compromised	0.0691261	0.88128	5.06	2.54	4	3.1	A_21_P0000465	Unknown
A_21_P0000467	-0.14833	Compromised	0.14833	Compromised	4.8e-07	0.227315	Compromised	0.431301	Compromised	0.329308	0.208843	1.68	1.78	1.98	2.09	A_21_P0000467	Unknown
A_21_P0000480	-0.0703771	Detected	0.0703771	Detected	0	0.205129	Detected	-0.314377	Detected	-0.0546241	0.857931	65.3	62.1	71.8	45.9	A_21_P0000480	Unknown
A_21_P0000520	-0.235388	Detected	0.235388	Detected	0	-0.0183945	Detected	0.283666	Detected	0.132636	0.682055	39.4	47.1	41.6	47	A_21_P0000520	Unknown
A_21_P0000564	-0.153683	Compromised	0.153683	Compromised	0	0.699014	Compromised	0.403357	Compromised	0.551185	0.122722	1.78	1.9	2.92	2.18	A_21_P0000564	Unknown
A_21_P0013913	-0.0570984	Detected	0.0570984	Detected	0	-0.401187	Detected	-0.415576	Detected	-0.408382	0.0192863	21.1	19.7	15.1	13.7	A_21_P0013913	Unknown
A_21_P0013928	-0.215418	Detected	0.215418	Detected	0	0.183424	Detected	-0.00786018	Detected	0.0877817	0.74533	25.8	30	30.9	24.8	A_21_P0013928	Unknown
A_21_P0013937	-0.00752044	Detected	0.00752044	Detected	0	-0.296954	Detected	-0.488886	Detected	-0.39292	0.0551046	48.3	42.1	35.9	28.8	A_21_P0013937	Unknown
A_21_P0013942	-0.0788746	Compromised	0.0788741	Compromised	-4.8e-07	-0.316514	Compromised	0.69301	Compromised	0.188248	0.747868	3.18	3.06	2.45	4.52	A_21_P0013942	Unknown
A_21_P0013943	-0.149829	Compromised	0.149829	Compromised	0	0.263636	Compromised	0.489155	Compromised	0.376395	0.182522	1.62	1.72	1.96	2.1	A_21_P0013943	Unknown
A_21_P0013948	0.326285	Detected	-0.326285	Detected	2.4e-07	0.599076	Detected	-1.01032	Compromised	-0.205624	0.834854	27.7	15.2	30.4	9.13	A_21_P0013948	Unknown
A_21_P0013949	-0.146049	Compromised	0.14605	Compromised	4.8e-07	0.237922	Compromised	0.390999	Compromised	0.31446	0.196756	1.78	1.88	2.11	2.15	A_21_P0013949	Unknown
A_21_P0013954	-0.146932	Compromised	0.146931	Compromised	-4.8e-07	0.206942	Compromised	0.402634	Compromised	0.304788	0.226389	1.74	1.84	2.02	2.12	A_21_P0013954	Unknown
A_21_P0013957	0.304939	Compromised	-0.304939	Compromised	4.7e-07	0.197321	Compromised	0.287276	Compromised	0.242299	0.514168	5.29	2.99	4.46	4.35	A_21_P0013957	Unknown
A_21_P0013959	-0.144486	Compromised	0.144485	Compromised	-4.8e-07	0.296916	Compromised	0.457498	Compromised	0.377207	0.149992	1.67	1.76	2.06	2.11	A_21_P0013959	Unknown
A_21_P0013962	-0.154584	Compromised	0.154584	Compromised	-4.8e-07	0.298718	Compromised	0.562863	Compromised	0.43079	0.168258	1.6	1.71	1.99	2.19	A_21_P0013962	Unknown
A_21_P0013972	-0.143622	Compromised	0.143622	Compromised	4.8e-07	0.263632	Compromised	0.444582	Compromised	0.354107	0.172272	1.71	1.8	2.06	2.14	A_21_P0013972	Unknown
A_21_P0013988	-0.368595	Compromised	0.368594	Compromised	-4.8e-07	0.224895	Compromised	-0.086483	Compromised	0.0692058	0.878603	4.91	7.06	6.73	4.97	A_21_P0013988	Unknown
A_21_P0013990	0.0902343	Compromised	-0.0902343	Compromised	0	-0.32304	Compromised	0.48962	Compromised	0.0832901	0.859899	5.82	4.43	3.97	6.39	A_21_P0013990	Unknown
A_21_P0013992	-0.146339	Compromised	0.146339	Compromised	-4.8e-07	1.29041	Compromised	0.975291	Compromised	1.13285	0.0341933	1.59	1.68	3.91	2.88	A_21_P0013992	Unknown
A_21_P0013994	0.54793	Detected	-0.54793	Detected	0	-0.262838	Detected	-0.953944	Compromised	-0.608391	0.446782	28	11.3	14.5	8.23	A_21_P0013994	Unknown
A_21_P0013999	-0.0439658	Compromised	0.0439653	Compromised	-4.76e-07	0.926814	Detected	0.260865	Compromised	0.593839	0.219075	6.01	5.51	10.7	6.18	A_21_P0013999	Unknown
A_21_P0014005	-0.0372686	Compromised	0.0372691	Compromised	4.75e-07	0.725828	Compromised	0.591893	Compromised	0.65886	0.0132621	2.4	2.18	3.7	3.09	A_21_P0014005	Unknown
A_21_P0014013	-0.135037	Detected	0.135037	Detected	0	0.410532	Detected	0.30519	Detected	0.357861	0.132272	67.2	69.9	89.1	75.9	A_21_P0014013	Unknown
A_21_P0014023	-0.834405	Detected	0.834406	Detected	5e-07	0.320024	Detected	0.249611	Detected	0.284818	0.76557	1360	3730	2750	2400	A_21_P0014023	Unknown
A_21_P0014027	-0.149066	Compromised	0.149066	Compromised	0	0.245269	Compromised	0.463446	Compromised	0.354357	0.195082	1.65	1.75	1.97	2.1	A_21_P0014027	Unknown
A_21_P0014037	0.413722	Detected	-0.413722	Compromised	0	0.506679	Compromised	0.0107918	Compromised	0.258736	0.645344	8.99	4.37	8.71	5.66	A_21_P0014037	Unknown
A_21_P0014040	0.116783	Detected	-0.116783	Detected	0	-0.141669	Detected	-0.3796	Detected	-0.260634	0.258388	101	74.1	76.7	59.6	A_21_P0014040	Unknown
A_21_P0014050	-0.136999	Compromised	0.136999	Compromised	4.8e-07	0.288997	Compromised	1.21779	Compromised	0.753392	0.259979	1.86	1.94	2.27	3.96	A_21_P0014050	Unknown
A_21_P0014052	-0.015862	Compromised	0.015862	Compromised	0	0.0940323	Compromised	1.26287	Compromised	0.678452	0.365654	2.03	1.79	1.99	4.1	A_21_P0014052	Unknown
A_21_P0014064	-0.160386	Compromised	0.160386	Compromised	0	0.258327	Compromised	0.493245	Compromised	0.375786	0.199286	1.68	1.81	2.04	2.2	A_21_P0014064	Unknown
A_21_P0014068	-0.118288	Compromised	0.118288	Compromised	0	0.251643	Compromised	0.343838	Compromised	0.29774	0.143644	1.84	1.87	2.16	2.11	A_21_P0014068	Unknown
A_21_P0014095	0.265042	Compromised	-0.265042	Compromised	0	-0.202902	Compromised	0.0143771	Compromised	-0.0942624	0.773362	3.03	1.81	1.99	2.12	A_21_P0014095	Unknown
A_21_P0014104	-0.157264	Compromised	0.157264	Compromised	0	0.251644	Compromised	0.502554	Compromised	0.377099	0.201708	1.65	1.77	1.99	2.17	A_21_P0014104	Unknown
A_21_P0014121	0.642652	Compromised	-0.642652	Compromised	4.7e-07	-0.50693	Compromised	-0.262684	Compromised	-0.384807	0.615942	4.86	1.72	1.99	2.16	A_21_P0014121	Unknown
A_21_P0014122	0.257518	Detected	-0.257518	Compromised	-2.5e-07	-0.308111	Compromised	0.573453	Detected	0.132671	0.819258	13.8	8.33	8.47	14.3	A_21_P0014122	Unknown
A_21_P0014126	-0.0113909	Detected	0.0113909	Detected	0	0.317947	Detected	0.0800836	Detected	0.199015	0.237685	28.3	24.8	32.3	25.1	A_21_P0014126	Unknown
A_21_P0014154	-0.148818	Compromised	0.148818	Compromised	-4.8e-07	0.258604	Compromised	0.454977	Compromised	0.35679	0.183343	1.66	1.76	2	2.1	A_21_P0014154	Unknown
A_21_P0014163	-0.154584	Compromised	0.154584	Compromised	-4.8e-07	0.298718	Compromised	0.556261	Compromised	0.427489	0.167533	1.6	1.71	1.99	2.18	A_21_P0014163	Unknown
A_21_P0014169	0.787752	Detected	-0.787752	Compromised	-4.5e-07	-0.127343	Compromised	0.567191	Compromised	0.219924	0.82224	10.4	3.01	5.01	7.43	A_21_P0014169	Unknown
A_21_P0014178	-0.0942912	Compromised	0.0942907	Compromised	-4.8e-07	0.23492	Compromised	0.423791	Compromised	0.329355	0.132351	1.77	1.74	2.02	2.11	A_21_P0014178	Unknown
A_21_P0014192	-0.0750253	Detected	0.0750253	Detected	0	-0.146839	Detected	-0.435099	Detected	-0.290969	0.215222	140	134	121	90.8	A_21_P0014192	Unknown
A_21_P0014193	0.230423	Compromised	-0.230422	Compromised	4.8e-07	0.745322	Compromised	0.298244	Compromised	0.521783	0.245601	6.51	4.08	8.45	5.68	A_21_P0014193	Unknown
A_21_P0014203	0.546129	Detected	-0.546129	Compromised	0	0.484202	Detected	0.843384	Detected	0.663793	0.36757	13.1	5.3	11.4	13.4	A_21_P0014203	Unknown
A_21_P0014212	-0.27939	Compromised	0.27939	Compromised	-2.4e-07	-1.18531	Compromised	-1.67916	Compromised	-1.43223	0.0615825	6.91	8.78	3.35	2.18	A_21_P0014212	Unknown
A_21_P0014213	0.379371	Detected	-0.379371	Detected	-2.3e-07	0.285174	Detected	-0.295111	Detected	-0.00496876	0.992644	25.5	13	21.7	13.3	A_21_P0014213	Unknown
A_21_P0014219	-0.00221515	Detected	0.00221515	Detected	0	-0.230571	Detected	-0.434234	Detected	-0.332402	0.0824488	42.3	36.6	32.8	26.1	A_21_P0014219	Unknown
A_21_P0014240	-0.802964	Compromised	0.802964	Compromised	0	-0.423351	Compromised	-0.343803	Compromised	-0.383577	0.68033	1.87	4.91	2.21	2.14	A_21_P0014240	Unknown
A_21_P0014255	0.655727	Detected	-0.655727	Detected	0	0.000783205	Detected	-1.72228	Compromised	-0.860748	0.509966	28.6	9.94	16.5	4.58	A_21_P0014255	Unknown
A_21_P0014259	-0.068198	Detected	0.068198	Detected	0	0.242641	Detected	0.433556	Detected	0.338099	0.102264	34.7	32.9	39.1	40.9	A_21_P0014259	Unknown
A_21_P0014263	-0.143001	Compromised	0.143	Compromised	-4.7e-07	0.253101	Compromised	0.406565	Compromised	0.329833	0.179163	1.74	1.83	2.08	2.12	A_21_P0014263	Unknown
A_21_P0014264	-0.122053	Compromised	0.122053	Compromised	0	0.253356	Compromised	0.339075	Compromised	0.296216	0.149183	1.85	1.89	2.18	2.12	A_21_P0014264	Unknown
A_21_P0014265	-0.147853	Compromised	0.147853	Compromised	0	0.217986	Compromised	0.42159	Compromised	0.319788	0.21679	1.7	1.8	1.99	2.1	A_21_P0014265	Unknown
A_21_P0014294	-0.992265	Compromised	0.992265	Compromised	0	-0.0185833	Compromised	-0.326059	Compromised	-0.172321	0.879532	1.62	5.53	2.89	2.14	A_21_P0014294	Unknown
A_21_P0014305	-0.145624	Compromised	0.145623	Compromised	-4.8e-07	0.269313	Compromised	0.388663	Compromised	0.328988	0.171731	1.8	1.9	2.18	2.17	A_21_P0014305	Unknown
A_21_P0014320	-0.159107	Compromised	0.159107	Compromised	0	0.295972	Compromised	0.560783	Compromised	0.428378	0.174362	1.59	1.71	1.98	2.18	A_21_P0014320	Unknown
A_21_P0014324	0.0942774	Detected	-0.0942774	Detected	0	0.0987358	Detected	-0.185717	Detected	-0.0434904	0.822635	68.7	52	62.6	47.1	A_21_P0014324	Unknown
A_21_P0014345	0.0568447	Detected	-0.0568447	Detected	0	0.101614	Detected	-0.563369	Detected	-0.230877	0.564357	79.4	63.3	74.4	43	A_21_P0014345	Unknown
A_21_P0014374	0.141455	Compromised	-0.141454	Compromised	4.8e-07	-0.66013	Compromised	-0.455759	Compromised	-0.557945	0.0854653	3.78	2.68	1.97	2.08	A_21_P0014374	Unknown
A_21_P0014382	-0.455916	Compromised	0.455917	Compromised	2.4e-07	-0.293464	Compromised	-0.059299	Compromised	-0.176381	0.743876	4.8	7.79	4.88	5.26	A_21_P0014382	Unknown
A_21_P0014384	-0.732214	Compromised	0.732214	Compromised	-4.5e-07	-0.327627	Compromised	-0.102108	Compromised	-0.214868	0.799099	1.63	3.88	1.96	2.1	A_21_P0014384	Unknown
A_21_P0014386	0.0467086	Compromised	-0.0467086	Compromised	0	1.0127	Compromised	1.51427	Compromised	1.26348	0.0384286	2.35	1.9	4.17	5.41	A_21_P0014386	Unknown
A_21_P0014391	-0.588897	Detected	0.588897	Detected	0	-0.103369	Detected	-0.366953	Compromised	-0.235161	0.734351	10.3	20.1	13.1	10	A_21_P0014391	Unknown
A_21_P0014394	0.432132	Detected	-0.432133	Compromised	-2.4e-07	-1.53197	Compromised	-1.34379	Compromised	-1.43788	0.0829952	9.75	4.62	2.27	2.37	A_21_P0014394	Unknown
A_21_P0014413	-0.90203	Compromised	0.90203	Compromised	0	-0.45564	Compromised	-0.187638	Compromised	-0.321639	0.758014	1.64	4.94	2.03	2.24	A_21_P0014413	Unknown
A_21_P0014414	1.01668	Detected	-1.01668	Compromised	0	-0.0747385	Compromised	-0.631782	Compromised	-0.35326	0.769423	8.21	1.73	3.5	2.18	A_21_P0014414	Unknown
A_21_P0014417	0.319411	Compromised	-0.319411	Compromised	0	-0.569334	Compromised	-0.382525	Compromised	-0.475929	0.288948	4.26	2.36	2.09	2.18	A_21_P0014417	Unknown
A_21_P0014418	0.202384	Compromised	-0.202384	Compromised	0	-0.0824499	Compromised	0.0702505	Compromised	-0.0060997	0.980064	2.87	1.87	2.14	2.18	A_21_P0014418	Unknown
A_21_P0014420	-0.764024	Compromised	0.764024	Detected	-2.6e-07	0.333127	Compromised	-0.0641088	Compromised	0.134509	0.880381	4.06	10.1	7.89	5.49	A_21_P0014420	Unknown
A_21_P0014433	-0.15681	Detected	0.15681	Detected	0	-0.0119178	Compromised	0.304749	Compromised	0.146416	0.578658	9.16	9.82	9.2	10.5	A_21_P0014433	Unknown
A_21_P0014438	-0.16101	Compromised	0.16101	Compromised	0	0.260767	Compromised	0.503326	Compromised	0.382047	0.198529	1.66	1.79	2.02	2.19	A_21_P0014438	Unknown
A_21_P0014447	0.503361	Compromised	-0.503361	Compromised	0	0.288734	Compromised	0.59392	Compromised	0.441327	0.489747	3.96	1.7	3.1	3.51	A_21_P0014447	Unknown
A_21_P0014457	0.108695	Compromised	-0.108696	Compromised	-4.8e-07	0.0142031	Compromised	0.133333	Compromised	0.0737679	0.612106	2.48	1.84	2.11	2.1	A_21_P0014457	Unknown
A_21_P0014467	-0.154584	Compromised	0.154584	Compromised	-4.8e-07	0.284145	Compromised	0.536269	Compromised	0.410207	0.176028	1.6	1.71	1.97	2.15	A_21_P0014467	Unknown
A_21_P0014468	-0.538461	Compromised	0.538461	Compromised	0	-1.30085	Compromised	-0.532185	Compromised	-0.916515	0.300207	3.66	6.66	1.96	3.06	A_21_P0014468	Unknown
A_21_P0014484	-0.155791	Compromised	0.155791	Compromised	0	-1.32274	Compromised	0.363327	Compromised	-0.479708	0.632089	4.82	5.16	1.95	5.75	A_21_P0014484	Unknown
A_21_P0014492	-0.121496	Detected	0.121496	Detected	0	-0.0759995	Detected	0.645593	Detected	0.284797	0.532416	1440	1470	1350	2040	A_21_P0014492	Unknown
A_21_P0014500	-0.154584	Compromised	0.154584	Compromised	-4.8e-07	0.276803	Compromised	0.522786	Compromised	0.399795	0.180298	1.6	1.71	1.96	2.13	A_21_P0014500	Unknown
A_21_P0014506	-0.147387	Compromised	0.147387	Compromised	-4.8e-07	0.201578	Compromised	0.405182	Compromised	0.30338	0.23241	1.72	1.82	1.99	2.1	A_21_P0014506	Unknown
A_21_P0014523	-0.148572	Compromised	0.148573	Compromised	4.8e-07	0.91011	Compromised	0.480505	Compromised	0.695307	0.116873	1.67	1.77	3.16	2.15	A_21_P0014523	Unknown
A_21_P0014524	-0.139416	Compromised	0.139416	Compromised	-4.8e-07	0.266411	Compromised	0.453795	Compromised	0.360103	0.165265	1.72	1.8	2.07	2.16	A_21_P0014524	Unknown
A_21_P0014532	-0.142597	Compromised	0.142597	Compromised	4.8e-07	0.201913	Compromised	0.390481	Compromised	0.296197	0.225293	1.76	1.85	2.03	2.12	A_21_P0014532	Unknown
A_21_P0014540	-0.14809	Compromised	0.14809	Compromised	-4.7e-07	0.218992	Compromised	0.429864	Compromised	0.324428	0.216248	1.69	1.79	1.98	2.1	A_21_P0014540	Unknown
A_21_P0014541	-0.159777	Compromised	0.159776	Compromised	-4.8e-07	0.248918	Compromised	0.476781	Compromised	0.362849	0.205692	1.7	1.83	2.05	2.2	A_21_P0014541	Unknown
A_21_P0014546	-0.164692	Compromised	0.164693	Compromised	4.8e-07	0.255545	Compromised	0.490979	Compromised	0.373262	0.20652	1.67	1.81	2.03	2.19	A_21_P0014546	Unknown
A_21_P0014581	-0.625119	Compromised	0.625119	Compromised	-2e-07	-1.32704	Compromised	-0.673121	Compromised	-1.00008	0.292042	3.85	7.9	2.15	3.1	A_21_P0014581	Unknown
A_21_P0014590	-0.688578	Compromised	0.688578	Compromised	4.5e-07	1.57733	Compromised	-0.196096	Compromised	0.690614	0.601123	1.87	4.19	8.17	2.19	A_21_P0014590	Unknown
A_21_P0014605	-0.239193	Compromised	0.239193	Compromised	0	0.946106	Compromised	1.68436	Compromised	1.31523	0.0960061	2.28	2.74	4.71	7.2	A_21_P0014605	Unknown
A_21_P0014607	-0.803128	Compromised	0.803127	Detected	-2.7e-07	-0.0233495	Compromised	-1.08043	Compromised	-0.551891	0.623904	4.95	13	7.72	3.4	A_21_P0014607	Unknown
A_21_P0014610	-0.154876	Compromised	0.154876	Compromised	4.7e-07	0.458749	Compromised	0.565014	Compromised	0.511882	0.0888873	1.59	1.7	2.21	2.18	A_21_P0014610	Unknown
A_21_P0014613	-0.355849	Compromised	0.355849	Compromised	0	0.0342956	Compromised	0.108049	Compromised	0.0711722	0.860699	1.89	2.67	2.25	2.17	A_21_P0014613	Unknown
A_21_P0014614	0.397139	Compromised	-0.397139	Compromised	0	-1.00733	Compromised	-0.789601	Compromised	-0.898464	0.160855	5.77	2.87	1.98	2.11	A_21_P0014614	Unknown
A_21_P0014630	-0.144708	Compromised	0.144708	Compromised	-4.8e-07	0.233568	Compromised	0.445281	Compromised	0.339425	0.198857	1.66	1.75	1.96	2.08	A_21_P0014630	Unknown
A_21_P0014634	-0.162635	Compromised	0.162635	Compromised	0	1.43622	Compromised	0.519229	Compromised	0.977723	0.18218	1.61	1.74	4.43	2.15	A_21_P0014634	Unknown
A_21_P0014654	-0.149572	Compromised	0.149572	Compromised	0	0.269662	Compromised	0.487388	Compromised	0.378525	0.177366	1.63	1.73	1.98	2.11	A_21_P0014654	Unknown
A_21_P0014656	-0.475105	Compromised	0.475105	Compromised	0	-0.329927	Compromised	0.332109	Compromised	0.00109147	0.998667	2.19	3.65	2.2	3.19	A_21_P0014656	Unknown
A_21_P0014667	-0.159777	Compromised	0.159776	Compromised	-4.8e-07	0.248918	Compromised	0.476781	Compromised	0.362849	0.205692	1.7	1.83	2.05	2.2	A_21_P0014667	Unknown
A_21_P0014673	-0.164361	Compromised	0.164361	Compromised	4.8e-07	0.230585	Compromised	0.434924	Compromised	0.332755	0.227679	1.8	1.95	2.15	2.27	A_21_P0014673	Unknown
A_21_P0014680	-0.14809	Compromised	0.14809	Compromised	-4.7e-07	0.218992	Compromised	0.422978	Compromised	0.320985	0.216171	1.69	1.79	1.98	2.09	A_21_P0014680	Unknown
A_21_P0014690	-0.133846	Compromised	0.133846	Compromised	4.8e-07	1.80075	Compromised	0.678231	Compromised	1.23949	0.164751	1.82	1.89	6.32	2.66	A_21_P0014690	Unknown
A_21_P0014692	0.0804448	Detected	-0.0804448	Compromised	0	0.288092	Detected	0.738698	Detected	0.513395	0.165007	10.2	7.87	10.7	13.4	A_21_P0014692	Unknown
A_21_P0014698	-0.536034	Compromised	0.536034	Compromised	-4.7e-07	0.789602	Compromised	0.0225	Compromised	0.406051	0.600635	1.77	3.21	4.03	2.17	A_21_P0014698	Unknown
A_21_P0014717	-0.622283	Compromised	0.622283	Detected	-2.6e-07	0.000901222	Compromised	-0.195044	Compromised	-0.0970713	0.89168	7.29	14.9	10.2	8.16	A_21_P0014717	Unknown
A_21_P0014731	0.191875	Compromised	-0.191875	Compromised	0	-0.273782	Compromised	0.0588951	Compromised	-0.107443	0.713371	6.02	3.98	3.96	4.57	A_21_P0014731	Unknown
A_21_P0014734	-0.159107	Compromised	0.159107	Compromised	0	0.288668	Compromised	0.752601	Compromised	0.520634	0.2054	1.59	1.71	1.97	2.49	A_21_P0014734	Unknown
A_21_P0014743	0.45673	Compromised	-0.45673	Compromised	0	-0.830929	Compromised	-0.630599	Compromised	-0.730764	0.258514	5.59	2.56	2.08	2.19	A_21_P0014743	Unknown
A_21_P0014748	-0.292481	Detected	0.292481	Detected	0	-0.121209	Detected	0.265114	Detected	0.0719523	0.856351	26.2	33.9	26.8	32.1	A_21_P0014748	Unknown
A_21_P0014749	-0.154623	Detected	0.154623	Detected	0	0.316461	Detected	0.524176	Detected	0.420319	0.152654	43.6	46.6	54.9	58.1	A_21_P0014749	Unknown
A_21_P0014750	-0.154876	Compromised	0.154876	Compromised	4.7e-07	0.300203	Compromised	0.565014	Compromised	0.432609	0.167731	1.59	1.7	1.98	2.18	A_21_P0014750	Unknown
A_21_P0014751	0.145017	Detected	-0.145017	Detected	0	-0.232952	Detected	-0.261944	Detected	-0.247448	0.231627	30.9	21.8	21.6	19.4	A_21_P0014751	Unknown
A_21_P0014752	-0.152637	Compromised	0.152637	Compromised	0	1.31994	Compromised	0.483136	Compromised	0.901538	0.180247	1.67	1.78	4.21	2.16	A_21_P0014752	Unknown
A_21_P0014754	0.266564	Compromised	-0.266565	Compromised	-4.8e-07	1.2594	Compromised	1.00041	Compromised	1.12991	0.0624196	3.59	2.14	6.49	4.97	A_21_P0014754	Unknown
A_21_P0014755	0.294056	Detected	-0.294056	Detected	-2.4e-07	0.0847383	Detected	0.29561	Detected	0.190174	0.604607	16.8	9.64	13.2	14	A_21_P0014755	Unknown
A_21_P0014758	-0.400514	Compromised	0.400513	Compromised	-4.8e-07	-0.862483	Compromised	-1.04035	Compromised	-0.951415	0.146234	5.11	7.68	3.37	2.73	A_21_P0014758	Unknown
A_21_P0014763	-0.489968	Compromised	0.489968	Detected	0	-0.821606	Compromised	-1.67867	Compromised	-1.25014	0.194759	5.86	9.97	4.23	2.14	A_21_P0014763	Unknown
A_21_P0014766	0.0686266	Detected	-0.0686266	Detected	0	-0.223607	Detected	0.314233	Detected	0.0453129	0.885314	30.6	24	22.7	30.2	A_21_P0014766	Unknown
A_21_P0014769	-0.12536	Compromised	0.12536	Compromised	0	0.282595	Compromised	0.337558	Compromised	0.310076	0.13697	1.9	1.95	2.29	2.18	A_21_P0014769	Unknown
A_21_P0014770	0.00101185	Compromised	-0.00101185	Compromised	0	0.139617	Compromised	0.375574	Compromised	0.257596	0.160687	2.02	1.74	2.02	2.18	A_21_P0014770	Unknown
A_21_P0014771	0.0224743	Detected	-0.0224743	Detected	0	-0.0971127	Detected	0.677648	Detected	0.290268	0.53243	119	99.5	99.5	156	A_21_P0014771	Unknown
A_21_P0014772	-0.346039	Compromised	0.346039	Compromised	4.8e-07	0.0645266	Compromised	0.138748	Compromised	0.101637	0.797763	1.88	2.62	2.27	2.19	A_21_P0014772	Unknown
A_21_P0014774	-0.0896482	Compromised	0.0896482	Compromised	0	-0.0626111	Compromised	0.147847	Compromised	0.0426178	0.787007	2.15	2.1	1.99	2.11	A_21_P0014774	Unknown
A_21_P0014777	0.41194	Compromised	-0.41194	Compromised	0	-0.571053	Compromised	-0.374335	Compromised	-0.472694	0.380484	4.33	2.11	1.99	2.09	A_21_P0014777	Unknown
A_21_P0014780	-0.171186	Compromised	0.171186	Compromised	0	-0.44942	Compromised	0.341046	Compromised	-0.0541873	0.91139	2.67	2.92	2	3.17	A_21_P0014780	Unknown
A_21_P0014787	0.414048	Compromised	-0.414048	Compromised	0	0.819758	Compromised	1.05338	Compromised	0.93657	0.161409	3.54	1.72	4.26	4.59	A_21_P0014787	Unknown
A_21_P0014790	0.323741	Detected	-0.323741	Detected	0	0.189531	Detected	0.160236	Detected	0.174883	0.643488	29.6	16.3	24.5	22	A_21_P0014790	Unknown
A_21_P0014792	0.390852	Detected	-0.390852	Detected	0	-0.694624	Detected	-0.24199	Detected	-0.468307	0.408711	28.5	14.3	12.2	15.3	A_21_P0014792	Unknown
A_21_P0014799	-0.0270228	Detected	0.0270228	Detected	0	-0.0800371	Detected	0.15637	Detected	0.0381665	0.782742	20.1	18	17.6	19	A_21_P0014799	Unknown
A_21_P0014808	-0.0155203	Detected	0.0155203	Detected	0	0.123085	Detected	-0.265506	Detected	-0.0712101	0.749876	590	520	590	413	A_21_P0014808	Unknown
A_21_P0014811	0.446233	Compromised	-0.446233	Compromised	0	-0.331393	Compromised	-0.0848203	Compromised	-0.208107	0.697075	3.68	1.71	1.95	2.12	A_21_P0014811	Unknown
A_21_P0014819	0.443977	Compromised	-0.443977	Compromised	0	0.707338	Compromised	0.108398	Compromised	0.407868	0.525848	6.2	2.89	6.76	4.09	A_21_P0014819	Unknown
A_21_P0014821	0.629168	Compromised	-0.629169	Compromised	-4.7e-07	0.570368	Compromised	0.495757	Compromised	0.533062	0.486738	4.77	1.72	4.16	3.62	A_21_P0014821	Unknown
A_21_P0014826	-0.0720301	Compromised	0.0720301	Compromised	0	0.700555	Compromised	-0.324084	Compromised	0.188236	0.75084	2.99	2.85	4.64	2.09	A_21_P0014826	Unknown
A_21_P0014828	-0.356616	Compromised	0.356616	Compromised	0	0.703039	Compromised	0.620836	Compromised	0.661937	0.2065	1.69	2.39	3.2	2.77	A_21_P0014828	Unknown
A_21_P0014834	0.0462174	Detected	-0.0462174	Detected	0	0.122814	Detected	1.01376	Detected	0.568286	0.332173	30.9	25	29.6	50.3	A_21_P0014834	Unknown
A_21_P0014845	-0.142597	Compromised	0.142597	Compromised	4.8e-07	0.209003	Compromised	0.390481	Compromised	0.299742	0.21816	1.76	1.85	2.04	2.12	A_21_P0014845	Unknown
A_21_P0014849	0.0947163	Detected	-0.0947163	Detected	0	0.0505888	Detected	0.150611	Detected	0.1006	0.44676	89.1	67.4	78.5	77.1	A_21_P0014849	Unknown
A_21_P0014850	0.482546	Compromised	-0.482547	Compromised	-4.7e-07	-0.375125	Compromised	-0.114345	Compromised	-0.244735	0.672843	3.87	1.71	1.94	2.13	A_21_P0014850	Unknown
A_21_P0014854	-0.225824	Compromised	0.225824	Compromised	0	0.629315	Compromised	1.00647	Compromised	0.817893	0.108701	3.84	4.53	6.31	7.51	A_21_P0014854	Unknown
A_21_P0014855	-0.448358	Compromised	0.448358	Compromised	-2.4e-07	-0.159193	Compromised	0.992554	Detected	0.41668	0.625649	5	8.03	5.55	11.3	A_21_P0014855	Unknown
A_21_P0014859	0.201046	Compromised	-0.201046	Compromised	0	-0.150793	Compromised	0.0638943	Compromised	-0.0434494	0.866403	2.88	1.88	2.05	2.18	A_21_P0014859	Unknown
A_21_P0014862	-0.0321171	Detected	0.0321171	Detected	0	0.204226	Detected	0.166962	Detected	0.185594	0.0377717	856	772	916	818	A_21_P0014862	Unknown
A_21_P0014864	0.142956	Detected	-0.142956	Detected	0	0.244932	Detected	0.0795763	Detected	0.162254	0.42944	71.8	50.8	70	57.2	A_21_P0014864	Unknown
A_21_P0014867	0.411433	Compromised	-0.411433	Compromised	0	-0.589411	Compromised	0.270678	Compromised	-0.159367	0.813963	4.45	2.17	2.02	3.36	A_21_P0014867	Unknown
A_21_P0014875	-0.15373	Compromised	0.153729	Compromised	-4.8e-07	0.258199	Compromised	0.490051	Compromised	0.374125	0.191471	1.63	1.74	1.97	2.12	A_21_P0014875	Unknown
A_21_P0014876	-0.271013	Detected	0.271013	Detected	0	-0.132407	Detected	-0.540761	Detected	-0.336584	0.425762	168	211	168	116	A_21_P0014876	Unknown
A_21_P0014877	-0.1283	Detected	0.1283	Detected	0	0.000491381	Detected	-0.197918	Detected	-0.0987132	0.60467	29.5	30.4	29.3	23.4	A_21_P0014877	Unknown
A_21_P0014880	-0.0112441	Detected	0.0112441	Detected	0	-0.292095	Detected	0.206259	Detected	-0.042918	0.879223	218	191	163	211	A_21_P0014880	Unknown
A_21_P0014882	-0.102775	Detected	0.102775	Detected	0	0.345428	Detected	0.0501683	Detected	0.197798	0.386178	18.8	18.7	23.3	17.4	A_21_P0014882	Unknown
A_21_P0014893	-0.0233426	Compromised	0.0233431	Compromised	4.76e-07	0.576736	Compromised	0.0311604	Compromised	0.303948	0.382521	6.42	5.72	8.84	5.55	A_21_P0014893	Unknown
A_21_P0014894	-0.377317	Compromised	0.377317	Compromised	0	1.40882	Detected	1.51793	Detected	1.46337	0.0616605	5.49	7.99	17.2	17	A_21_P0014894	Unknown
A_21_P0014897	0.488029	Compromised	-0.488029	Compromised	0	-0.363358	Compromised	0.295694	Compromised	-0.0338321	0.959408	4.31	1.89	2.17	3.14	A_21_P0014897	Unknown
A_21_P0014903	0.233092	Detected	-0.233092	Detected	0	0.0163662	Detected	0.521194	Detected	0.26878	0.515952	42.6	26.6	33.3	43.3	A_21_P0014903	Unknown
A_21_P0014905	-0.152637	Compromised	0.152637	Compromised	0	0.968587	Compromised	0.476441	Compromised	0.722514	0.130023	1.67	1.78	3.3	2.15	A_21_P0014905	Unknown
A_21_P0014907	-0.909356	Compromised	0.909356	Compromised	4.6e-07	-0.475622	Compromised	0.191381	Compromised	-0.142121	0.896799	1.63	4.96	2	2.91	A_21_P0014907	Unknown
A_21_P0014911	-0.141333	Detected	0.141333	Detected	0	0.0471985	Detected	0.295437	Detected	0.171318	0.458546	284	298	294	320	A_21_P0014911	Unknown
A_21_P0014912	0.0668876	Detected	-0.0668874	Compromised	2.4e-07	0.195509	Compromised	-0.0605302	Compromised	0.0674895	0.686285	8.7	6.84	8.64	6.63	A_21_P0014912	Unknown
A_21_P0014925	-0.154876	Compromised	0.154876	Compromised	4.7e-07	0.300203	Compromised	0.571617	Compromised	0.43591	0.168485	1.59	1.7	1.98	2.19	A_21_P0014925	Unknown
A_21_P0014931	-0.159107	Compromised	0.159107	Compromised	0	0.288668	Compromised	0.547487	Compromised	0.418077	0.178362	1.59	1.71	1.97	2.16	A_21_P0014931	Unknown
A_21_P0014936	-0.161327	Compromised	0.161328	Compromised	4.8e-07	0.269167	Compromised	0.511726	Compromised	0.390447	0.192711	1.65	1.78	2.02	2.19	A_21_P0014936	Unknown
A_21_P0014946	0.539855	Compromised	-0.539855	Compromised	0	0.447434	Compromised	0.98238	Compromised	0.714907	0.357233	4.19	1.71	3.57	4.74	A_21_P0014946	Unknown
A_22_P00005983	-0.743782	Compromised	0.743782	Compromised	0	1.32915	Compromised	-0.342377	Compromised	0.493385	0.702307	1.91	4.62	7.3	2.1	A_22_P00005983	Unknown
A_23_P90470	0.0257201	Detected	-0.0257201	Detected	0	0.308061	Detected	0.408954	Detected	0.358507	0.0240505	105	87.4	116	114	A_23_P90470	Unknown
A_24_P229726	-0.119315	Compromised	0.119315	Compromised	0	0.885198	Compromised	0.485862	Compromised	0.68553	0.0984223	1.69	1.72	3.08	2.14	A_24_P229726	Unknown
A_24_P246636	0.980202	Compromised	-0.980202	Compromised	5e-07	-0.851748	Compromised	-0.586937	Compromised	-0.719343	0.542673	7.76	1.72	1.98	2.18	A_24_P246636	Unknown
A_24_P280926	-0.0151896	Detected	0.0151901	Detected	4.765e-07	-0.00837326	Detected	-0.379151	Detected	-0.193762	0.40694	12600	11100	11500	8150.01	A_24_P280926	Unknown
A_24_P32766	-0.102795	Detected	0.102795	Detected	-4.74e-07	0.0127258	Detected	-0.124325	Detected	-0.0557995	0.695765	18900	18800	18600	15500	A_24_P32766	Unknown
A_24_P504621	-0.143412	Compromised	0.143413	Compromised	4.8e-07	0.269368	Compromised	0.456463	Compromised	0.362916	0.168168	1.72	1.81	2.08	2.17	A_24_P504621	Unknown
A_24_P613108	-0.159107	Compromised	0.159107	Compromised	0	0.273946	Compromised	0.527309	Compromised	0.400628	0.187668	1.59	1.71	1.95	2.13	A_24_P613108	Unknown
A_24_P662366	0.0194716	Detected	-0.0194716	Detected	0	0.456956	Detected	0.113795	Detected	0.285376	0.240219	53	44.5	65.2	47.1	A_24_P662366	Unknown
A_24_P704878	-0.0753617	Compromised	0.0753617	Compromised	0	-0.0787749	Compromised	-0.269399	Compromised	-0.174087	0.288307	4.48	4.29	4.06	3.26	A_24_P704878	Unknown
A_24_P818268	-0.0531645	Detected	0.0531645	Detected	0	-0.614998	Detected	-0.0579653	Detected	-0.336482	0.357203	18.2	16.9	11.2	15.1	A_24_P818268	Unknown
A_24_P833256	-0.138866	Compromised	0.138866	Compromised	0	0.262773	Compromised	0.429399	Compromised	0.346086	0.166058	1.75	1.83	2.1	2.16	A_24_P833256	Unknown
A_24_P935506	-0.15879	Compromised	0.158791	Compromised	4.8e-07	0.279939	Compromised	0.538758	Compromised	0.409349	0.18373	1.6	1.72	1.97	2.16	A_24_P935506	Unknown
A_32_P10100	-0.121916	Detected	0.121916	Detected	-4.74e-07	0.0870781	Detected	0.183314	Detected	0.135196	0.410716	14000	14300	14700	14400	A_32_P10100	Unknown
A_32_P102252	0.136091	Detected	-0.136091	Detected	0	-0.109446	Detected	-0.0979216	Detected	-0.103684	0.526052	1540	1100	1180	1090	A_32_P102252	Unknown
A_32_P113154	-0.031137	Detected	0.0311375	Detected	4.76e-07	0.171194	Detected	0.0700264	Detected	0.12061	0.179415	7750	6980	8100	6920	A_32_P113154	Unknown
A_32_P125549	-0.083425	Detected	0.0834246	Detected	-4.75e-07	0.0460196	Detected	-0.056529	Detected	-0.00525475	0.962084	15800	15300	15700	13400	A_32_P125549	Unknown
A_32_P152696	-0.0492826	Detected	0.0492821	Detected	-4.76e-07	-0.0305548	Detected	0.0278997	Detected	-0.00132751	0.983622	9030	8340	8310	7929.99	A_32_P152696	Unknown
A_32_P153979	-0.147619	Compromised	0.147618	Compromised	-4.7e-07	0.202491	Compromised	0.406477	Compromised	0.304484	0.231792	1.71	1.81	1.98	2.09	A_32_P153979	Unknown
A_32_P185628	0.0746627	Compromised	-0.0746632	Compromised	-4.75e-07	-0.0306573	Compromised	1.03363	Compromised	0.501484	0.449212	4.95	3.85	4.18	8.01	A_32_P185628	Unknown
A_32_P230825	-0.113525	Detected	0.113525	Detected	4.76e-07	-0.0460024	Detected	-0.359551	Detected	-0.202777	0.404757	6240	6300	5940	4380	A_32_P230825	Unknown
A_32_P48615	0.0500441	Detected	-0.0500441	Detected	0	0.356658	Detected	-0.399523	Detected	-0.0214329	0.960294	25.1	20.2	28.2	15.3	A_32_P48615	Unknown
A_32_P53558	0.0529122	Detected	-0.0529122	Detected	0	-0.0646625	Detected	-0.00156736	Detected	-0.0331149	0.644695	252	202	211	202	A_32_P53558	Unknown
A_32_P79115	0.0232639	Detected	-0.0232639	Detected	0	0.0407853	Detected	-0.49521	Detected	-0.227212	0.487242	79.5	66.4	73.1	46.2	A_32_P79115	Unknown
A_32_P88905	0.0363324	Detected	-0.0363324	Detected	0	-0.192271	Detected	0.106886	Detected	-0.0426929	0.807546	445	365	345	389	A_32_P88905	Unknown
A_33_P3209135	0.717925	Compromised	-0.717924	Compromised	5e-07	-0.629942	Compromised	-0.425571	Compromised	-0.527757	0.542418	5.52	1.76	1.97	2.08	A_33_P3209135	Unknown
A_33_P3209185	0.331723	Compromised	-0.331723	Compromised	0	0.58136	Compromised	0.627055	Compromised	0.604208	0.210838	3.25	1.77	3.51	3.32	A_33_P3209185	Unknown
A_33_P3209209	-0.199829	Compromised	0.199829	Compromised	0	1.01153	Compromised	1.18406	Compromised	1.0978	0.0371327	1.74	1.98	3.66	3.78	A_33_P3209209	Unknown
A_33_P3209566	-0.144486	Compromised	0.144485	Compromised	-4.8e-07	0.268627	Compromised	0.471108	Compromised	0.369868	0.170987	1.67	1.76	2.02	2.13	A_33_P3209566	Unknown
A_33_P3209696	-0.318503	Compromised	0.318503	Compromised	2.4e-07	-1.7157	Compromised	-1.49842	Compromised	-1.60706	0.0411608	5.77	7.74	1.99	2.12	A_33_P3209696	Unknown
A_33_P3209703	-0.440032	Compromised	0.440032	Compromised	-4.8e-07	-0.0825319	Compromised	0.125135	Compromised	0.0213015	0.966703	1.77	2.81	2.06	2.18	A_33_P3209703	Unknown
A_33_P3209756	0.0125465	Detected	-0.0125465	Detected	0	0.00375462	Detected	0.0265021	Detected	0.0151284	0.46594	83.4	70.7	75.3	70.1	A_33_P3209756	Unknown
A_33_P3209924	-0.148572	Compromised	0.148573	Compromised	4.8e-07	0.213659	Compromised	0.439671	Compromised	0.326665	0.222223	1.67	1.77	1.95	2.09	A_33_P3209924	Unknown
A_33_P3210069	-0.182239	Detected	0.182239	Detected	0	0.178485	Detected	-0.0294502	Detected	0.0745173	0.756424	75.1	83.4	87.6	69.5	A_33_P3210069	Unknown
A_33_P3210516	-0.110238	Detected	0.110238	Detected	0	-0.165314	Detected	-0.215487	Detected	-0.1904	0.234194	19.9	20	17.4	15.4	A_33_P3210516	Unknown
A_33_P3210561	-0.0467019	Detected	0.0467024	Detected	4.77e-07	0.038662	Detected	0.0866423	Detected	0.0626521	0.355114	13800	12700	13300	12600	A_33_P3210561	Unknown
A_33_P3210605	0.0420709	Compromised	-0.0420709	Compromised	0	-0.447355	Compromised	-0.243369	Compromised	-0.345362	0.0886877	3.06	2.49	1.98	2.09	A_33_P3210605	Unknown
A_33_P3210969	0.715306	Detected	-0.715306	Detected	0	-0.414905	Detected	-0.580748	Detected	-0.497826	0.560821	100	32	41.5	33.9	A_33_P3210969	Unknown
A_33_P3210975	-0.261207	Compromised	0.261206	Compromised	-4.8e-07	0.683457	Compromised	0.369979	Compromised	0.526718	0.225936	1.59	1.97	2.78	2.05	A_33_P3210975	Unknown
A_33_P3211018	-0.12536	Compromised	0.12536	Compromised	0	0.282595	Compromised	0.344161	Compromised	0.313378	0.135919	1.9	1.95	2.29	2.19	A_33_P3211018	Unknown
A_33_P3211098	-0.684793	Compromised	0.684793	Compromised	0	-0.248801	Compromised	1.1763	Compromised	0.463749	0.685071	1.66	3.7	2.04	5.02	A_33_P3211098	Unknown
A_33_P3211223	-0.469593	Compromised	0.469593	Compromised	0	-0.361254	Compromised	-0.605142	Compromised	-0.483198	0.424215	2.89	4.78	2.83	2.19	A_33_P3211223	Unknown
A_33_P3211478	-0.279299	Compromised	0.279299	Compromised	-4.8e-07	-1.58163	Compromised	-0.0616741	Compromised	-0.821654	0.416998	5.62	7.14	2.07	5.44	A_33_P3211478	Unknown
A_33_P3211854	-0.159107	Compromised	0.159107	Compromised	0	0.288668	Compromised	0.540792	Compromised	0.41473	0.177767	1.59	1.71	1.97	2.15	A_33_P3211854	Unknown
A_33_P3211862	-0.148818	Compromised	0.148818	Compromised	-4.8e-07	0.287173	Compromised	0.508915	Compromised	0.398044	0.165138	1.66	1.76	2.04	2.18	A_33_P3211862	Unknown
A_33_P3212052	-0.8004	Compromised	0.8004	Compromised	0	0.647374	Compromised	0.212001	Compromised	0.429688	0.65605	1.59	4.16	3.94	2.67	A_33_P3212052	Unknown
A_33_P3212316	0.0173419	Detected	-0.0173419	Detected	0	-0.0859811	Detected	-0.455035	Detected	-0.270508	0.281834	28.5	24	24.1	17.1	A_33_P3212316	Unknown
A_33_P3212700	-0.0482151	Detected	0.0482151	Detected	0	0.696569	Detected	0.479408	Detected	0.587989	0.0384837	18	16.6	27.4	21.6	A_33_P3212700	Unknown
A_33_P3212704	0.0857098	Detected	-0.0857098	Detected	0	-0.961039	Detected	-1.28675	Detected	-1.1239	0.0257805	42.3	32.4	18.6	13.6	A_33_P3212704	Unknown
A_33_P3213134	-0.0481279	Detected	0.0481279	Detected	0	-0.0765049	Detected	-0.543646	Detected	-0.310076	0.323182	796	734	709	470	A_33_P3213134	Unknown
A_33_P3213311	0.127655	Compromised	-0.127655	Compromised	0	-0.0138478	Compromised	0.225346	Compromised	0.105749	0.606936	2.38	1.72	1.96	2.12	A_33_P3213311	Unknown
A_33_P3213317	0.221628	Detected	-0.221628	Detected	0	0.494327	Detected	0.0523202	Detected	0.273323	0.4746	15.4	9.77	16.9	11.4	A_33_P3213317	Unknown
A_33_P3213518	0.37835	Compromised	-0.378349	Compromised	4.8e-07	-0.284716	Compromised	-0.0689363	Compromised	-0.176826	0.697121	3.8	1.94	2.18	2.32	A_33_P3213518	Unknown
A_33_P3213526	-0.159107	Compromised	0.159107	Compromised	0	0.295972	Compromised	1.37756	Compromised	0.836767	0.275988	1.59	1.71	1.98	3.84	A_33_P3213526	Unknown
A_33_P3213712	0.149545	Detected	-0.149545	Detected	-2.3e-07	0.122141	Detected	-0.408988	Compromised	-0.143424	0.684266	18.4	12.9	16.4	10.4	A_33_P3213712	Unknown
A_33_P3213992	-1.07267	Compromised	1.07267	Compromised	0	-0.711672	Compromised	-0.00785065	Compromised	-0.359761	0.780173	1.74	6.64	2.03	3.03	A_33_P3213992	Unknown
A_33_P3214076	-0.150114	Compromised	0.150114	Compromised	0	0.486671	Compromised	0.408421	Compromised	0.447546	0.102079	1.77	1.88	2.5	2.17	A_33_P3214076	Unknown
A_33_P3214179	-0.18662	Detected	0.18662	Detected	0	-0.529883	Detected	-1.64423	Compromised	-1.08706	0.205539	16.2	18.1	11.6	4.91	A_33_P3214179	Unknown
A_33_P3214284	-0.070214	Compromised	0.070214	Compromised	0	-1.91954	Compromised	-1.27898	Compromised	-1.59926	0.039557	8.33	7.92	2.1	3	A_33_P3214284	Unknown
A_33_P3214750	-0.15879	Compromised	0.158791	Compromised	4.8e-07	0.279939	Compromised	1.25555	Compromised	0.767742	0.273175	1.6	1.72	1.97	3.55	A_33_P3214750	Unknown
A_33_P3214782	-0.161327	Compromised	0.161328	Compromised	4.8e-07	1.24031	Compromised	0.505124	Compromised	0.872718	0.161755	1.65	1.78	3.96	2.18	A_33_P3214782	Unknown
A_33_P3215232	0.0643172	Compromised	-0.0643168	Compromised	4.8e-07	0.140347	Compromised	-1.07358	Compromised	-0.466616	0.524458	8.01	6.32	7.67	3.03	A_33_P3215232	Unknown
A_33_P3215363	-0.170914	Detected	0.170914	Detected	0	-0.821138	Compromised	-0.961149	Compromised	-0.891144	0.0403719	11.8	12.9	6.83	5.68	A_33_P3215363	Unknown
A_33_P3215527	-0.146339	Compromised	0.146339	Compromised	-4.8e-07	0.286714	Compromised	0.491867	Compromised	0.38929	0.161256	1.59	1.68	1.95	2.06	A_33_P3215527	Unknown
A_33_P3215565	0.594541	Compromised	-0.594541	Compromised	0	0.729952	Compromised	0.74631	Compromised	0.738131	0.340304	4.52	1.71	4.51	4.18	A_33_P3215565	Unknown
A_33_P3215611	0.488694	Compromised	-0.488695	Compromised	-4.7e-07	-0.808247	Compromised	0.0534301	Compromised	-0.377408	0.620944	6.14	2.69	2.27	3.78	A_33_P3215611	Unknown
A_33_P3215729	-0.143834	Compromised	0.143835	Compromised	4.8e-07	0.292739	Compromised	0.439284	Compromised	0.366012	0.151511	1.7	1.79	2.09	2.12	A_33_P3215729	Unknown
A_33_P3216200	-0.124497	Compromised	0.124497	Compromised	0	-1.48796	Compromised	-1.09529	Compromised	-1.29162	0.0309032	5.58	5.72	1.97	2.37	A_33_P3216200	Unknown
A_33_P3216487	0.162704	Detected	-0.162704	Detected	0	-0.26111	Detected	-0.297285	Detected	-0.279197	0.230223	88.9	61.2	60.2	53.8	A_33_P3216487	Unknown
A_33_P3216621	-0.363739	Compromised	0.363739	Compromised	-4.6e-07	1.51522	Detected	0.123727	Compromised	0.819475	0.406159	4.25	6.07	14.2	4.96	A_33_P3216621	Unknown
A_33_P3216635	-0.0838556	Detected	0.0838556	Detected	0	-0.455827	Compromised	-0.777847	Compromised	-0.616837	0.0767731	10.3	9.98	7.23	5.3	A_33_P3216635	Unknown
A_33_P3216640	-0.15373	Compromised	0.153729	Compromised	-4.8e-07	0.258199	Compromised	0.503598	Compromised	0.380898	0.192423	1.63	1.74	1.97	2.14	A_33_P3216640	Unknown
A_33_P3217507	-0.307303	Compromised	0.307303	Compromised	-4.8e-07	0.118332	Compromised	0.372323	Compromised	0.245327	0.537457	1.59	2.1	1.94	2.12	A_33_P3217507	Unknown
A_33_P3217629	-0.151089	Compromised	0.151089	Compromised	4.8e-07	1.5273	Compromised	0.43376	Compromised	0.980531	0.226034	1.73	1.84	5.03	2.16	A_33_P3217629	Unknown
A_33_P3217867	0.671825	Compromised	-0.671825	Compromised	0	-0.55904	Compromised	-0.300221	Compromised	-0.42963	0.594178	5.09	1.73	1.97	2.16	A_33_P3217867	Unknown
A_33_P3218013	-0.0874314	Detected	0.0874314	Compromised	0	-0.183899	Compromised	0.255885	Compromised	0.0359931	0.893064	8.38	8.16	7.12	8.85	A_33_P3218013	Unknown
A_33_P3218118	-0.0113738	Detected	0.0113738	Detected	0	0.0946152	Detected	-0.464528	Detected	-0.184957	0.576558	67.1	58.8	65.6	40.8	A_33_P3218118	Unknown
A_33_P3218258	-0.161237	Compromised	0.161236	Compromised	-4.7e-07	0.656453	Compromised	0.428518	Compromised	0.542486	0.110873	1.78	1.92	2.85	2.23	A_33_P3218258	Unknown
A_33_P3218309	-0.154584	Compromised	0.154584	Compromised	-4.8e-07	0.298718	Compromised	0.556261	Compromised	0.427489	0.167533	1.6	1.71	1.99	2.18	A_33_P3218309	Unknown
A_33_P3218491	-0.738489	Compromised	0.738488	Compromised	-5e-07	-0.389524	Compromised	-0.185919	Compromised	-0.287721	0.736715	1.72	4.13	1.99	2.1	A_33_P3218491	Unknown
A_33_P3218504	-0.210117	Compromised	0.210117	Compromised	-2.4e-07	-1.91991	Compromised	-1.00543	Compromised	-1.46267	0.100782	7.13	8.23	1.98	3.42	A_33_P3218504	Unknown
A_33_P3218564	-0.126031	Detected	0.126032	Detected	4.8e-07	0.173729	Detected	-0.11924	Detected	0.0272446	0.900799	11000	11300	12300	9200	A_33_P3218564	Unknown
A_33_P3218741	-0.153392	Detected	0.153393	Detected	4.8e-07	-0.0217056	Detected	0.111197	Detected	0.0447454	0.814033	20900	22300	20800	20900	A_33_P3218741	Unknown
A_33_P3218910	-0.148572	Compromised	0.148573	Compromised	4.8e-07	0.250185	Compromised	0.467022	Compromised	0.358603	0.19052	1.67	1.77	2	2.13	A_33_P3218910	Unknown
A_33_P3219138	-0.761498	Compromised	0.761499	Detected	2.5e-07	0.758414	Detected	0.447476	Compromised	0.602945	0.519049	4.76	11.8	12.4	9.16	A_33_P3219138	Unknown
A_33_P3219210	-0.0665369	Compromised	0.0665364	Compromised	-4.7e-07	-0.508028	Compromised	-0.0303102	Compromised	-0.269169	0.391098	4.44	4.2	2.97	3.79	A_33_P3219210	Unknown
A_33_P3219286	-0.277016	Detected	0.277016	Detected	0	0.430646	Detected	-0.0954471	Detected	0.1676	0.703701	30.4	38.5	45.1	28.7	A_33_P3219286	Unknown
A_33_P3219454	-0.0216594	Detected	0.0216589	Detected	-4.77e-07	-0.030611	Detected	0.117398	Detected	0.0433936	0.630267	14400	12800	13000	13200	A_33_P3219454	Unknown
A_33_P3219505	-0.154296	Compromised	0.154296	Compromised	0	1.07546	Compromised	1.08772	Compromised	1.08159	0.0197804	1.61	1.72	3.43	3.17	A_33_P3219505	Unknown
A_33_P3220213	-0.284169	Compromised	0.28417	Compromised	4.7e-07	-0.456351	Compromised	-0.223453	Compromised	-0.339902	0.383684	2.58	3.3	2.08	2.24	A_33_P3220213	Unknown
A_33_P3220395	-0.146339	Compromised	0.146339	Compromised	-4.8e-07	0.279296	Compromised	0.849761	Compromised	0.564528	0.22031	1.59	1.68	1.94	2.64	A_33_P3220395	Unknown
A_33_P3220406	-0.335114	Compromised	0.335115	Compromised	4.8e-07	0.0799046	Compromised	0.592911	Compromised	0.336408	0.508966	1.61	2.21	1.95	2.55	A_33_P3220406	Unknown
A_33_P3220678	-0.134914	Compromised	0.134913	Compromised	-4.8e-07	0.25292	Compromised	0.406384	Compromised	0.329652	0.167634	1.75	1.82	2.08	2.12	A_33_P3220678	Unknown
A_33_P3220748	-0.143834	Compromised	0.143835	Compromised	4.8e-07	0.20009	Compromised	0.411803	Compromised	0.305947	0.22882	1.7	1.79	1.96	2.08	A_33_P3220748	Unknown
A_33_P3220780	0.441754	Compromised	-0.441755	Compromised	-4.8e-07	1.37316	Compromised	-0.0701504	Compromised	0.651505	0.521821	3.7	1.73	6.41	2.16	A_33_P3220780	Unknown
A_33_P3220847	-0.14809	Compromised	0.14809	Compromised	-4.7e-07	0.218992	Compromised	0.422978	Compromised	0.320985	0.216171	1.69	1.79	1.98	2.09	A_33_P3220847	Unknown
A_33_P3220979	0.195523	Compromised	-0.195524	Compromised	-4.8e-07	-0.0681658	Compromised	0.135438	Compromised	0.0336363	0.892726	2.63	1.73	1.99	2.1	A_33_P3220979	Unknown
A_33_P3220994	0.412945	Detected	-0.412945	Compromised	0	-0.7502	Compromised	0.0403295	Compromised	-0.354935	0.597985	14.2	6.91	5.76	9.13	A_33_P3220994	Unknown
A_33_P3221040	0.141972	Compromised	-0.141971	Compromised	4.8e-07	0.0186071	Compromised	0.0726042	Compromised	0.0456057	0.782212	2.71	1.92	2.26	2.15	A_33_P3221040	Unknown
A_33_P3221059	0.130613	Compromised	-0.130613	Compromised	0	-0.397255	Compromised	-0.657505	Compromised	-0.52738	0.103575	4.46	3.21	2.81	2.15	A_33_P3221059	Unknown
A_33_P3221134	-0.244439	Compromised	0.244439	Compromised	0	-0.916356	Compromised	-0.697263	Compromised	-0.806809	0.0948104	3.42	4.14	1.95	2.08	A_33_P3221134	Unknown
A_33_P3221318	-0.101983	Compromised	0.101983	Compromised	0	-0.626728	Compromised	-0.374603	Compromised	-0.500665	0.0908261	3.12	3.1	1.97	2.15	A_33_P3221318	Unknown
A_33_P3221384	-0.13431	Detected	0.13431	Detected	0	-0.126949	Detected	-0.545286	Detected	-0.336118	0.308927	23	23.9	21	14.4	A_33_P3221384	Unknown
A_33_P3221793	-0.400264	Detected	0.400264	Detected	0	0.0837738	Detected	-0.562376	Detected	-0.239301	0.687513	20.7	31.1	26.3	15.4	A_33_P3221793	Unknown
A_33_P3221888	-0.351785	Compromised	0.351785	Compromised	-4.8e-07	-0.0255527	Compromised	1.53171	Compromised	0.75308	0.471073	2.52	3.54	2.87	7.74	A_33_P3221888	Unknown
A_33_P3221925	0.376983	Compromised	-0.376983	Compromised	-4.7e-07	0.252554	Compromised	-0.0599046	Compromised	0.0963247	0.835366	3.48	1.78	2.9	2.14	A_33_P3221925	Unknown
A_33_P3221978	0.208194	Detected	-0.208194	Detected	0	-1.55789	Compromised	-0.932902	Compromised	-1.2454	0.0801321	16.4	10.6	4.38	6.19	A_33_P3221978	Unknown
A_33_P3221980	-0.0636468	Detected	0.0636473	Detected	4.8e-07	0.0856848	Detected	-0.85392	Detected	-0.384118	0.502894	5360	5050	5400	2580	A_33_P3221980	Unknown
A_33_P3222196	-0.15879	Compromised	0.158791	Compromised	4.8e-07	0.294512	Compromised	0.525338	Compromised	0.409925	0.172008	1.6	1.72	1.99	2.14	A_33_P3222196	Unknown
A_33_P3222354	0.0021739	Compromised	-0.00217342	Compromised	4.768e-07	0.155135	Compromised	0.330266	Compromised	0.2427	0.109309	2	1.72	2.02	2.09	A_33_P3222354	Unknown
A_33_P3222524	-0.772141	Compromised	0.772141	Compromised	-4.6e-07	-0.806728	Compromised	-0.501039	Compromised	-0.653884	0.493508	2.21	5.56	1.96	2.22	A_33_P3222524	Unknown
A_33_P3222529	-0.118164	Compromised	0.118164	Compromised	4.74e-07	0.25607	Compromised	0.335186	Compromised	0.295628	0.141033	1.86	1.89	2.19	2.12	A_33_P3222529	Unknown
A_33_P3222600	0.241914	Detected	-0.241914	Detected	0	0.344109	Detected	0.319625	Detected	0.331867	0.304188	32.1	19.8	31.3	28.2	A_33_P3222600	Unknown
A_33_P3222664	0.0142744	Detected	-0.0142744	Detected	0	0.125	Detected	0.0713494	Detected	0.0981748	0.0839181	836	707	820	724	A_33_P3222664	Unknown
A_33_P3223111	0.593343	Detected	-0.593343	Compromised	-2.6e-07	0.518178	Compromised	-0.102129	Compromised	0.208025	0.785414	11.4	4.32	9.83	5.86	A_33_P3223111	Unknown
A_33_P3223142	-0.247569	Compromised	0.247569	Compromised	-4.8e-07	0.14773	Compromised	0.188632	Compromised	0.168181	0.568202	1.9	2.31	2.27	2.14	A_33_P3223142	Unknown
A_33_P3223663	-0.156678	Compromised	0.156678	Compromised	0	0.24208	Compromised	0.485758	Compromised	0.363919	0.208165	1.67	1.79	2	2.17	A_33_P3223663	Unknown
A_33_P3223712	-0.152905	Compromised	0.152905	Compromised	4.7e-07	0.290142	Compromised	0.504829	Compromised	0.397485	0.167193	1.66	1.77	2.05	2.18	A_33_P3223712	Unknown
A_33_P3223860	-0.335114	Compromised	0.335115	Compromised	4.8e-07	0.591515	Compromised	0.803129	Compromised	0.697322	0.185658	1.61	2.21	2.78	2.95	A_33_P3223860	Unknown
A_33_P3224050	0.226666	Compromised	-0.226666	Compromised	0	0.533058	Compromised	0.0503387	Compromised	0.291698	0.471255	3	1.89	3.37	2.21	A_33_P3224050	Unknown
A_33_P3224285	-0.147853	Compromised	0.147853	Compromised	0	1.85981	Compromised	1.9021	Compromised	1.88096	0.00624614	1.7	1.8	6.21	5.86	A_33_P3224285	Unknown
A_33_P3224715	-0.144486	Compromised	0.144485	Compromised	-4.8e-07	0.210328	Compromised	0.436838	Compromised	0.323583	0.220025	1.67	1.76	1.94	2.08	A_33_P3224715	Unknown
A_33_P3224780	0.461795	Compromised	-0.461795	Compromised	0	-0.330964	Compromised	1.19401	Compromised	0.431522	0.67615	4.31	1.96	2.26	5.96	A_33_P3224780	Unknown
A_33_P3224971	0.160236	Detected	-0.160236	Detected	0	0.108764	Detected	-0.454449	Detected	-0.172842	0.647062	802	554	703	436	A_33_P3224971	Unknown
A_33_P3225128	-0.152905	Compromised	0.152905	Compromised	4.7e-07	0.283087	Compromised	0.478112	Compromised	0.380599	0.170714	1.66	1.77	2.04	2.14	A_33_P3225128	Unknown
A_33_P3225572	-0.161435	Detected	0.161434	Detected	-4.8e-07	-0.0535259	Detected	-0.181299	Detected	-0.117413	0.56859	1900	2050	1860	1560	A_33_P3225572	Unknown
A_33_P3225983	0.338673	Detected	-0.338673	Detected	0	0.229897	Detected	0.384653	Detected	0.307275	0.469735	82.5	44.5	69.5	70.9	A_33_P3225983	Unknown
A_33_P3226105	-0.203811	Detected	0.203811	Detected	0	-0.224936	Compromised	-0.628435	Compromised	-0.426685	0.275183	10.4	11.9	9.31	6.45	A_33_P3226105	Unknown
A_33_P3226228	-0.10142	Detected	0.10142	Detected	0	-0.0759897	Detected	0.0574493	Detected	-0.00927019	0.946083	83.5	82.9	77.2	77.6	A_33_P3226228	Unknown
A_33_P3226460	0.18018	Compromised	-0.180179	Compromised	4.8e-07	-0.034852	Compromised	0.236562	Compromised	0.100855	0.69855	2.53	1.7	1.98	2.19	A_33_P3226460	Unknown
A_33_P3226565	0.0500863	Detected	-0.0500863	Detected	0	-0.31737	Detected	-0.442348	Detected	-0.379859	0.0416881	169	136	119	100	A_33_P3226565	Unknown
A_33_P3226675	-0.143412	Compromised	0.143413	Compromised	4.8e-07	0.661686	Compromised	2.53412	Compromised	1.5979	0.233638	1.72	1.81	2.73	9.16	A_33_P3226675	Unknown
A_33_P3226680	-0.135156	Detected	0.135156	Detected	0	-2.22262	Compromised	-0.650649	Compromised	-1.43663	0.213437	9.17	9.54	1.96	5.34	A_33_P3226680	Unknown
A_33_P3226788	0.0848496	Detected	-0.0848496	Detected	0	-0.0167482	Detected	-0.231105	Detected	-0.123926	0.460327	163	125	138	109	A_33_P3226788	Unknown
A_33_P3226800	0.309179	Compromised	-0.309179	Compromised	0	-0.171943	Compromised	1.7175	Compromised	0.77278	0.518269	3.15	1.77	2.05	6.96	A_33_P3226800	Unknown
A_33_P3227010	-0.233994	Detected	0.233994	Detected	2.5e-07	-0.249176	Compromised	-0.55291	Compromised	-0.401043	0.287106	9.89	11.8	8.89	6.6	A_33_P3227010	Unknown
A_33_P3227212	-0.192493	Compromised	0.192493	Compromised	0	-1.71568	Compromised	-1.51755	Compromised	-1.61662	0.0174649	6.17	6.95	1.95	2.05	A_33_P3227212	Unknown
A_33_P3227225	-0.423993	Detected	0.423993	Detected	0	0.266299	Detected	-0.302558	Compromised	-0.0181295	0.974899	9.21	14.3	13.5	8.34	A_33_P3227225	Unknown
A_33_P3227260	-0.129166	Compromised	0.129166	Compromised	0	0.260978	Compromised	0.334732	Compromised	0.297855	0.156882	1.89	1.95	2.25	2.17	A_33_P3227260	Unknown
A_33_P3227300	-0.130146	Compromised	0.130146	Compromised	-4.7e-07	0.250081	Compromised	0.369307	Compromised	0.309694	0.162971	1.81	1.87	2.14	2.13	A_33_P3227300	Unknown
A_33_P3227457	0.0820806	Detected	-0.0820806	Detected	0	-0.163926	Detected	-0.0331342	Detected	-0.0985301	0.446913	782	602	599	601	A_33_P3227457	Unknown
A_33_P3227556	0.207101	Detected	-0.207101	Detected	0	-0.281739	Detected	-0.0782771	Detected	-0.180008	0.516977	112	72.5	72.5	76.5	A_33_P3227556	Unknown
A_33_P3227703	-0.183861	Detected	0.183861	Detected	0	0.153055	Detected	-0.228868	Detected	-0.0379069	0.899398	69.9	77.8	80.2	56.4	A_33_P3227703	Unknown
A_33_P3228212	-0.150596	Compromised	0.150596	Compromised	-4.8e-07	0.223299	Compromised	0.430966	Compromised	0.327132	0.215617	1.75	1.86	2.06	2.18	A_33_P3228212	Unknown
A_33_P3228402	-0.0508585	Compromised	0.0508585	Compromised	0	-0.415958	Compromised	-1.54193	Compromised	-0.978945	0.22545	6.99	6.47	4.93	2.07	A_33_P3228402	Unknown
A_33_P3228499	0.21687	Compromised	-0.21687	Compromised	4.8e-07	1.17704	Compromised	-0.415201	Compromised	0.380922	0.68968	4.04	2.58	7.14	2.17	A_33_P3228499	Unknown
A_33_P3228533	-0.148818	Compromised	0.148818	Compromised	-4.8e-07	1.36294	Compromised	0.454977	Compromised	0.908959	0.197432	1.66	1.76	4.3	2.1	A_33_P3228533	Unknown
A_33_P3228543	-0.159107	Compromised	0.159107	Compromised	0	0.295972	Compromised	1.22723	Compromised	0.7616	0.261759	1.59	1.71	1.98	3.46	A_33_P3228543	Unknown
A_33_P3228603	-0.152637	Compromised	0.152637	Compromised	0	0.288765	Compromised	0.476441	Compromised	0.382603	0.166266	1.67	1.78	2.06	2.15	A_33_P3228603	Unknown
A_33_P3228828	-0.138866	Compromised	0.138866	Compromised	0	0.255887	Compromised	2.08178	Compromised	1.16883	0.333094	1.75	1.83	2.09	6.79	A_33_P3228828	Unknown
A_33_P3228868	-0.399891	Compromised	0.399891	Detected	-2.4e-07	0.151385	Compromised	-1.63977	Compromised	-0.744195	0.527224	6.1	9.16	8.12	2.15	A_33_P3228868	Unknown
A_33_P3229012	0.0535784	Detected	-0.0535784	Detected	0	-0.247516	Detected	-1.46644	Detected	-0.85698	0.296291	47.2	37.8	34.8	13.7	A_33_P3229012	Unknown
A_33_P3229022	-0.0569854	Detected	0.0569859	Detected	4.75e-07	-0.0618	Detected	-0.233497	Detected	-0.147648	0.288262	3910	3650	3540	2880	A_33_P3229022	Unknown
A_33_P3229037	-0.141253	Compromised	0.141253	Compromised	-4.7e-07	0.282552	Compromised	0.37582	Compromised	0.329186	0.157367	1.83	1.92	2.23	2.18	A_33_P3229037	Unknown
A_33_P3229390	0.136091	Detected	-0.136091	Detected	0	-0.0320447	Detected	-0.0847466	Detected	-0.0583956	0.714516	945	675	764	675	A_33_P3229390	Unknown
A_33_P3229527	0.208761	Detected	-0.208761	Detected	0	-0.318732	Detected	-0.397367	Detected	-0.35805	0.233939	192	124	121	105	A_33_P3229527	Unknown
A_33_P3229577	0.0910823	Detected	-0.0910821	Detected	2.39e-07	-0.64544	Compromised	-0.0267982	Detected	-0.336119	0.406678	14.6	11.1	7.96	11.2	A_33_P3229577	Unknown
A_33_P3229587	-0.0324819	Detected	0.0324819	Detected	0	0.165286	Detected	-0.407562	Detected	-0.121138	0.715156	21.5	19.4	22.4	13.8	A_33_P3229587	Unknown
A_33_P3229678	0.230696	Compromised	-0.230696	Compromised	0	0.352	Compromised	0.747129	Compromised	0.549565	0.21211	7.55	4.73	7.46	8.99	A_33_P3229678	Unknown
A_33_P3229754	-0.162972	Compromised	0.162972	Compromised	0	0.268415	Compromised	0.527882	Compromised	0.398149	0.196116	1.6	1.73	1.96	2.15	A_33_P3229754	Unknown
A_33_P3229760	-0.145859	Compromised	0.145859	Compromised	4.8e-07	0.261743	Compromised	0.474314	Compromised	0.368028	0.178271	1.61	1.7	1.94	2.06	A_33_P3229760	Unknown
A_33_P3229789	0.036437	Detected	-0.0364373	Detected	-2.38e-07	-0.207291	Detected	-0.882705	Compromised	-0.544998	0.249808	18.9	15.5	14.5	8.32	A_33_P3229789	Unknown
A_33_P3229958	-0.15879	Compromised	0.158791	Compromised	4.8e-07	0.287244	Compromised	0.545422	Compromised	0.416333	0.178896	1.6	1.72	1.98	2.17	A_33_P3229958	Unknown
A_33_P3230048	0.0530863	Compromised	-0.0530868	Compromised	-4.78e-07	-0.388253	Compromised	1.04455	Compromised	0.32815	0.69263	2.87	2.3	1.92	4.75	A_33_P3230048	Unknown
A_33_P3230578	-0.183026	Compromised	0.183026	Compromised	0	0.443307	Compromised	0.311992	Compromised	0.37765	0.191605	1.79	1.99	2.51	2.1	A_33_P3230578	Unknown
A_33_P3230676	-0.564589	Compromised	0.56459	Compromised	5e-07	1.18	Compromised	0.161903	Compromised	0.67095	0.470552	1.59	3	4.84	2.19	A_33_P3230676	Unknown
A_33_P3231005	0.0985208	Detected	-0.0985203	Detected	4.76e-07	0.219882	Detected	-0.410016	Detected	-0.095067	0.800393	10100	7600	9980	5910	A_33_P3231005	Unknown
A_33_P3231342	-0.228487	Compromised	0.228486	Compromised	-4.8e-07	0.205247	Compromised	0.462161	Compromised	0.333704	0.330948	1.63	1.93	2	2.19	A_33_P3231342	Unknown
A_33_P3231437	-0.154584	Compromised	0.154584	Compromised	-4.8e-07	0.284145	Compromised	0.529543	Compromised	0.406844	0.175396	1.6	1.71	1.97	2.14	A_33_P3231437	Unknown
A_33_P3231562	-0.510924	Compromised	0.510924	Compromised	0	-0.0947843	Compromised	0.762382	Compromised	0.333799	0.666347	1.65	2.89	2	3.32	A_33_P3231562	Unknown
A_33_P3231677	-0.202049	Detected	0.202049	Detected	0	0.143008	Detected	-0.0843017	Detected	0.0293529	0.910824	40.3	46	46.5	36.4	A_33_P3231677	Unknown
A_33_P3231761	-0.143205	Compromised	0.143205	Compromised	0	0.204628	Compromised	2.6669	Compromised	1.43576	0.366331	1.73	1.82	2	10.1	A_33_P3231761	Unknown
A_33_P3231833	-0.0838749	Detected	0.0838749	Detected	0	-0.528633	Detected	-0.318857	Detected	-0.423745	0.08747	451	437	301	319	A_33_P3231833	Unknown
A_33_P3232544	-0.0766027	Detected	0.0766027	Detected	0	-0.24724	Detected	-0.765721	Detected	-0.50648	0.201843	736	706	594	380	A_33_P3232544	Unknown
A_33_P3232643	-0.132856	Compromised	0.132856	Compromised	0	0.276397	Compromised	0.344278	Compromised	0.310338	0.151952	1.89	1.96	2.28	2.19	A_33_P3232643	Unknown
A_33_P3232742	0.61259	Compromised	-0.61259	Compromised	0	-1.15241	Compromised	-0.971194	Compromised	-1.0618	0.228546	7.67	2.83	2.05	2.13	A_33_P3232742	Unknown
A_33_P3233000	0.197219	Detected	-0.197219	Detected	0	0.00116062	Detected	-0.429667	Detected	-0.214253	0.539535	25.6	16.8	20.3	13.8	A_33_P3233000	Unknown
A_33_P3233085	-0.361891	Compromised	0.361891	Compromised	0	1.27589	Compromised	0.245431	Compromised	0.760662	0.350469	1.79	2.55	5.06	2.27	A_33_P3233085	Unknown
A_33_P3233100	0.202885	Detected	-0.202885	Compromised	2.4e-07	-2.00404	Compromised	-1.77753	Compromised	-1.89079	0.0147679	9.86	6.42	1.94	2.08	A_33_P3233100	Unknown
A_33_P3233229	-0.629327	Compromised	0.629327	Compromised	-5e-07	-0.244561	Compromised	0.0669775	Compromised	-0.0887919	0.903608	1.72	3.55	2.04	2.32	A_33_P3233229	Unknown
A_33_P3233318	0.22286	Detected	-0.222859	Compromised	2.4e-07	0.713309	Detected	-0.109933	Compromised	0.301688	0.585292	10.5	6.65	13.4	6.94	A_33_P3233318	Unknown
A_33_P3233546	-0.147853	Compromised	0.147853	Compromised	0	0.210718	Compromised	0.414704	Compromised	0.312711	0.223816	1.7	1.8	1.98	2.09	A_33_P3233546	Unknown
A_33_P3233731	0.000935554	Compromised	-0.000935554	Compromised	0	-0.164418	Compromised	-0.861738	Compromised	-0.513078	0.278982	7.58	6.53	6.14	3.47	A_33_P3233731	Unknown
A_33_P3233953	0.0493503	Detected	-0.0493498	Detected	4.75e-07	0.0464392	Detected	0.250636	Detected	0.148538	0.320481	3960	3190	3590	3790	A_33_P3233953	Unknown
A_33_P3234108	-0.150353	Compromised	0.150353	Compromised	0	0.273654	Compromised	0.513406	Compromised	0.39353	0.177317	1.6	1.7	1.95	2.11	A_33_P3234108	Unknown
A_33_P3234377	-0.0892768	Detected	0.0892773	Detected	4.8e-07	-0.115542	Detected	-0.287239	Detected	-0.201391	0.245462	4630	4520	4130	3360	A_33_P3234377	Unknown
A_33_P3234402	0.59236	Compromised	-0.59236	Compromised	-4.6e-07	-0.447033	Compromised	-0.188855	Compromised	-0.317944	0.652307	4.48	1.7	1.98	2.17	A_33_P3234402	Unknown
A_33_P3234442	-0.144049	Compromised	0.144049	Compromised	4.8e-07	0.259013	Compromised	0.447581	Compromised	0.353297	0.176591	1.69	1.78	2.03	2.12	A_33_P3234442	Unknown
A_33_P3234447	-0.163387	Compromised	0.163386	Compromised	-4.8e-07	0.243867	Compromised	0.471252	Compromised	0.357559	0.21428	1.71	1.85	2.06	2.21	A_33_P3234447	Unknown
A_33_P3234540	-0.358177	Detected	0.358177	Detected	0	0.0451913	Detected	-0.885201	Detected	-0.420005	0.548617	139	197	167	80.3	A_33_P3234540	Unknown
A_33_P3234814	-0.143834	Compromised	0.143835	Compromised	4.8e-07	0.271881	Compromised	0.472915	Compromised	0.372398	0.167842	1.7	1.79	2.06	2.17	A_33_P3234814	Unknown
A_33_P3235142	-0.154584	Compromised	0.154584	Compromised	-4.8e-07	0.276803	Compromised	0.509175	Compromised	0.392989	0.179188	1.6	1.71	1.96	2.11	A_33_P3235142	Unknown
A_33_P3235162	-0.161534	Compromised	0.161533	Compromised	-4.7e-07	0.230565	Compromised	0.423352	Compromised	0.326958	0.224318	1.77	1.91	2.11	2.21	A_33_P3235162	Unknown
A_33_P3235360	-0.260408	Detected	0.260408	Detected	0	0.132875	Detected	0.15975	Detected	0.146313	0.631202	20.2	25	24.1	22.5	A_33_P3235360	Unknown
A_33_P3235491	0.256354	Detected	-0.256354	Detected	0	0.117929	Detected	-0.278144	Detected	-0.0801079	0.82775	43.5	26.3	35.9	25	A_33_P3235491	Unknown
A_33_P3235521	0.405996	Compromised	-0.405997	Compromised	-4.8e-07	0.489352	Compromised	-0.056684	Compromised	0.216334	0.701585	3.46	1.7	3.33	2.09	A_33_P3235521	Unknown
A_33_P3235831	0.113238	Detected	-0.113238	Detected	0	-0.187876	Detected	-0.493232	Detected	-0.340554	0.215079	84.5	62.3	62.3	46.2	A_33_P3235831	Unknown
A_33_P3236152	-0.141069	Compromised	0.141069	Compromised	0	0.261877	Compromised	0.368142	Compromised	0.315009	0.171826	1.84	1.93	2.21	2.18	A_33_P3236152	Unknown
A_33_P3236213	0.363745	Compromised	-0.363745	Compromised	0	0.868278	Compromised	0.539562	Compromised	0.70392	0.219863	6.2	3.23	7.99	5.83	A_33_P3236213	Unknown
A_33_P3236778	-0.436184	Compromised	0.436184	Compromised	-4.7e-07	1.04269	Compromised	0.550723	Compromised	0.796707	0.252592	2.97	4.69	7.52	4.9	A_33_P3236778	Unknown
A_33_P3237344	-0.53743	Compromised	0.53743	Detected	0	-0.181973	Compromised	-1.11312	Compromised	-0.647545	0.458589	8.2	14.9	9.53	4.58	A_33_P3237344	Unknown
A_33_P3237605	-0.308817	Detected	0.308817	Detected	0	0.78672	Detected	-0.618622	Compromised	0.0840492	0.922799	10.2	13.5	19.8	6.85	A_33_P3237605	Unknown
A_33_P3237704	-0.106622	Detected	0.106622	Detected	0	0.150069	Detected	-0.489874	Detected	-0.169902	0.664442	340	340	369	217	A_33_P3237704	Unknown
A_33_P3237719	0.0164583	Detected	-0.0164583	Detected	0	-0.0416281	Detected	0.00950122	Detected	-0.0160635	0.65004	20.4	17.2	17.8	16.9	A_33_P3237719	Unknown
A_33_P3237819	-0.495134	Compromised	0.495134	Compromised	0	-0.328783	Compromised	-0.182335	Compromised	-0.255559	0.660414	2.06	3.53	2.1	2.13	A_33_P3237819	Unknown
A_33_P3237835	0.147834	Detected	-0.147834	Compromised	-2.4e-07	0.0339551	Compromised	-0.0703595	Compromised	-0.0182022	0.918173	10.9	7.66	9.15	7.8	A_33_P3237835	Unknown
A_33_P3237905	-0.223566	Compromised	0.223566	Compromised	0	0.894699	Compromised	-0.210516	Compromised	0.342092	0.623994	2.5	2.94	4.93	2.1	A_33_P3237905	Unknown
A_33_P3238325	0.042011	Detected	-0.042011	Detected	0	0.775495	Detected	0.160114	Detected	0.467804	0.270938	14.5	11.8	21.9	13.1	A_33_P3238325	Unknown
A_33_P3238402	-0.14194	Detected	0.14194	Detected	0	-0.0453064	Detected	-0.273552	Detected	-0.159429	0.473689	27.9	29.3	27.1	21.2	A_33_P3238402	Unknown
A_33_P3238611	-0.194547	Compromised	0.194547	Compromised	4.8e-07	0.248065	Compromised	0.963812	Compromised	0.605938	0.27525	1.62	1.83	2	3.01	A_33_P3238611	Unknown
A_33_P3238773	0.223208	Detected	-0.223208	Compromised	0	0.361814	Detected	0.213068	Compromised	0.287441	0.346267	10.9	6.9	10.9	9.01	A_33_P3238773	Unknown
A_33_P3238802	0.528519	Compromised	-0.528519	Compromised	0	-0.438527	Compromised	-0.210182	Compromised	-0.324354	0.609507	4.39	1.82	2.04	2.19	A_33_P3238802	Unknown
A_33_P3238944	-0.109908	Detected	0.109908	Detected	0	-0.0387309	Detected	-0.878639	Compromised	-0.458685	0.401459	21.9	22	20.9	10.7	A_33_P3238944	Unknown
A_33_P3239102	-0.0128541	Detected	0.0128546	Detected	4.77e-07	-0.114664	Detected	0.251735	Detected	0.0685353	0.744853	4430	3890	3750	4430	A_33_P3239102	Unknown
A_33_P3239659	0.319482	Compromised	-0.319483	Compromised	-4.7e-07	-0.249732	Compromised	-0.056634	Compromised	-0.153183	0.691309	3.43	1.9	2.1	2.2	A_33_P3239659	Unknown
A_33_P3239714	-0.170125	Compromised	0.170125	Compromised	0	0.270804	Compromised	0.849024	Compromised	0.559914	0.237034	1.63	1.78	2.01	2.75	A_33_P3239714	Unknown
A_33_P3239724	-0.146584	Compromised	0.146584	Compromised	-4.7e-07	0.288154	Compromised	0.493704	Compromised	0.390929	0.160649	1.58	1.67	1.94	2.05	A_33_P3239724	Unknown
A_33_P3239936	-0.126605	Compromised	0.126606	Compromised	4.8e-07	0.250513	Compromised	0.369609	Compromised	0.310061	0.157019	1.78	1.83	2.1	2.09	A_33_P3239936	Unknown
A_33_P3239989	0.208805	Detected	-0.208805	Compromised	0	-0.597044	Compromised	-0.513186	Compromised	-0.555115	0.121041	10.7	6.91	5.56	5.4	A_33_P3239989	Unknown
A_33_P3240078	0.0872355	Compromised	-0.0872359	Compromised	-4.8e-07	-0.0293007	Compromised	0.484085	Compromised	0.227392	0.489887	8.02	6.13	6.72	8.79	A_33_P3240078	Unknown
A_33_P3240144	-0.349336	Compromised	0.349335	Compromised	-4.7e-07	0.00923538	Compromised	0.220108	Compromised	0.114671	0.783079	1.7	2.38	1.98	2.1	A_33_P3240144	Unknown
A_33_P3240158	-0.130536	Compromised	0.130537	Compromised	4.8e-07	0.287224	Compromised	0.41987	Compromised	0.353547	0.137106	1.78	1.84	2.16	2.17	A_33_P3240158	Unknown
A_33_P3240234	0.0338562	Detected	-0.0338562	Detected	0	-0.485564	Detected	-0.756003	Detected	-0.620784	0.0469013	24.3	20	15.4	11.7	A_33_P3240234	Unknown
A_33_P3240652	-0.368076	Compromised	0.368076	Detected	-2.5e-07	0.372664	Detected	0.498647	Detected	0.435656	0.363644	8.63	12.4	13.1	13.1	A_33_P3240652	Unknown
A_33_P3241043	-0.0484524	Detected	0.0484514	Detected	-9.53e-07	0.0396004	Detected	-0.0415268	Detected	-0.000963211	0.989228	69700	64300	67300	58300	A_33_P3241043	Unknown
A_33_P3241046	-0.727475	Compromised	0.727475	Compromised	-4.7e-07	-0.279701	Compromised	1.31699	Compromised	0.518644	0.678483	1.59	3.76	1.97	5.46	A_33_P3241046	Unknown
A_33_P3241150	-0.240322	Compromised	0.240322	Compromised	0	0.103335	Compromised	-0.965279	Compromised	-0.430972	0.538537	5.5	6.62	6.34	2.77	A_33_P3241150	Unknown
A_33_P3241184	-0.48059	Detected	0.48059	Detected	0	0.900716	Detected	-0.318687	Detected	0.291014	0.743786	131	220	310	122	A_33_P3241184	Unknown
A_33_P3241596	0.183017	Detected	-0.183017	Detected	0	0.202978	Detected	-0.405717	Detected	-0.101369	0.802156	1140	763	1050	631	A_33_P3241596	Unknown
A_33_P3242039	-0.140059	Detected	0.140059	Detected	0	-0.30507	Detected	0.160923	Detected	-0.0720732	0.815743	27.4	28.7	22.2	28.1	A_33_P3242039	Unknown
A_33_P3242062	-0.0445323	Compromised	0.0445323	Compromised	0	-0.46875	Compromised	-0.196634	Compromised	-0.332692	0.145746	2.91	2.67	1.97	2.18	A_33_P3242062	Unknown
A_33_P3242416	0.131703	Detected	-0.131703	Detected	0	0.200164	Detected	-0.0940332	Detected	0.0530653	0.813298	29.5	21.2	28.1	21	A_33_P3242416	Unknown
A_33_P3242753	-0.146707	Compromised	0.146708	Compromised	4.7e-07	0.213113	Compromised	0.414864	Compromised	0.313988	0.219857	1.75	1.85	2.04	2.15	A_33_P3242753	Unknown
A_33_P3242814	-0.147387	Compromised	0.147387	Compromised	-4.8e-07	0.258441	Compromised	0.425647	Compromised	0.342044	0.180997	1.72	1.82	2.07	2.13	A_33_P3242814	Unknown
A_33_P3243343	-0.066195	Detected	0.0661945	Detected	-4.76e-07	0.00594807	Detected	-0.0797615	Detected	-0.0369067	0.685816	8440	7980	8060	6960	A_33_P3243343	Unknown
A_33_P3243600	0.333587	Compromised	-0.333587	Compromised	0	-0.202322	Compromised	0.019877	Compromised	-0.0912223	0.819554	3.24	1.76	2.03	2.17	A_33_P3243600	Unknown
A_33_P3244157	-0.14833	Compromised	0.14833	Compromised	4.8e-07	0.241815	Compromised	0.465409	Compromised	0.353612	0.197253	1.68	1.78	2	2.14	A_33_P3244157	Unknown
A_33_P3244269	-0.0093317	Detected	0.00933147	Compromised	-2.38e-07	0.440633	Detected	0.358299	Compromised	0.399466	0.0109825	9.59	8.38	11.9	10.3	A_33_P3244269	Unknown
A_33_P3244361	-0.020057	Detected	0.020057	Detected	0	-0.0622032	Detected	0.0140269	Detected	-0.0240881	0.632245	1070	949	944	912	A_33_P3244361	Unknown
A_33_P3244651	-0.152371	Compromised	0.152371	Compromised	-4.7e-07	0.244968	Compromised	0.481451	Compromised	0.36321	0.200369	1.68	1.79	2.01	2.17	A_33_P3244651	Unknown
A_33_P3244834	0.213607	Compromised	-0.213607	Compromised	0	-0.517727	Compromised	-0.32237	Compromised	-0.420049	0.215621	3.71	2.38	2.03	2.13	A_33_P3244834	Unknown
A_33_P3245021	-0.166061	Compromised	0.16606	Compromised	-4.7e-07	1.0709	Compromised	0.511351	Compromised	0.791125	0.135565	1.63	1.77	3.49	2.17	A_33_P3245021	Unknown
A_33_P3245126	0.0746632	Detected	-0.0746629	Detected	2.36e-07	0.052804	Detected	-0.689722	Compromised	-0.318459	0.488901	17.1	13.3	15.3	8.38	A_33_P3245126	Unknown
A_33_P3245133	0.278072	Detected	-0.278072	Detected	0	0.682381	Detected	-0.188972	Detected	0.246705	0.680208	45	26.4	54.1	27.1	A_33_P3245133	Unknown
A_33_P3245620	0.0166981	Detected	-0.0166981	Detected	0	-0.173511	Detected	-0.071892	Detected	-0.122701	0.148737	1050	885	836	822	A_33_P3245620	Unknown
A_33_P3245623	0.639002	Compromised	-0.639002	Compromised	0	-0.563817	Compromised	-0.862719	Compromised	-0.713268	0.39063	7.45	2.65	2.94	2.19	A_33_P3245623	Unknown
A_33_P3245660	-0.154876	Compromised	0.154876	Compromised	4.7e-07	0.300203	Compromised	0.571617	Compromised	0.43591	0.168485	1.59	1.7	1.98	2.19	A_33_P3245660	Unknown
A_33_P3245841	-1.00299	Compromised	1.00299	Compromised	0	-0.644417	Compromised	-0.433545	Compromised	-0.538981	0.6465	1.7	5.89	1.98	2.1	A_33_P3245841	Unknown
A_33_P3245907	-0.597983	Compromised	0.597983	Compromised	0	-0.193483	Compromised	0.107178	Compromised	-0.0431526	0.950573	1.68	3.32	2.02	2.28	A_33_P3245907	Unknown
A_33_P3246011	-0.133271	Compromised	0.133271	Compromised	4.8e-07	0.254078	Compromised	0.35371	Compromised	0.303894	0.166199	1.86	1.93	2.21	2.17	A_33_P3246011	Unknown
A_33_P3246413	-0.917939	Compromised	0.917939	Compromised	0	-0.496085	Compromised	-0.434232	Compromised	-0.465159	0.66285	1.89	5.82	2.3	2.2	A_33_P3246413	Unknown
A_33_P3246780	-0.147158	Compromised	0.147158	Compromised	4.8e-07	0.200676	Compromised	0.403902	Compromised	0.302289	0.233026	1.73	1.83	2	2.11	A_33_P3246780	Unknown
A_33_P3247068	-0.144708	Compromised	0.144708	Compromised	-4.8e-07	0.291284	Compromised	0.459087	Compromised	0.375185	0.154103	1.66	1.75	2.04	2.1	A_33_P3247068	Unknown
A_33_P3247072	0.35484	Compromised	-0.35484	Compromised	4.8e-07	-0.22025	Compromised	0.0300612	Compromised	-0.0950944	0.824078	3.28	1.73	2	2.18	A_33_P3247072	Unknown
A_33_P3247077	0.0202556	Detected	-0.020256	Detected	-4.76e-07	-0.0728683	Detected	-0.0783901	Detected	-0.0756292	0.0659232	3100	2600	2640	2410	A_33_P3247077	Unknown
A_33_P3247095	0.0381312	Detected	-0.0381312	Detected	0	0.0609283	Detected	0.0132136	Detected	0.037071	0.496487	36.3	29.7	33.5	29.7	A_33_P3247095	Unknown
A_33_P3247210	-0.0809879	Detected	0.0809879	Detected	0	0.0719376	Detected	-0.264185	Detected	-0.0961237	0.657676	40.1	38.7	40.5	29.4	A_33_P3247210	Unknown
A_33_P3247252	-0.00527954	Compromised	0.00528002	Compromised	4.77e-07	0.741447	Compromised	0.300729	Compromised	0.521088	0.141833	2.06	1.79	3.14	2.12	A_33_P3247252	Unknown
A_33_P3247678	0.00811887	Detected	-0.00811863	Detected	2.39e-07	0.307189	Detected	-0.390169	Compromised	-0.0414897	0.916179	13.6	11.6	15.2	8.59	A_33_P3247678	Unknown
A_33_P3247689	-0.14833	Compromised	0.14833	Compromised	4.8e-07	0.227315	Compromised	0.424381	Compromised	0.325848	0.208767	1.68	1.78	1.98	2.08	A_33_P3247689	Unknown
A_33_P3247783	0.660452	Compromised	-0.660452	Compromised	0	-0.550351	Compromised	-0.403708	Compromised	-0.47703	0.547367	5.3	1.83	2.08	2.11	A_33_P3247783	Unknown
A_33_P3247919	0.0159342	Detected	-0.0159342	Detected	0	0.458321	Detected	0.0618827	Detected	0.260102	0.321006	19.2	16.2	23.7	16.5	A_33_P3247919	Unknown
A_33_P3248028	0.166925	Compromised	-0.166925	Compromised	-4.8e-07	-0.197396	Compromised	0.595743	Compromised	0.199173	0.688918	2.82	1.93	1.99	3.16	A_33_P3248028	Unknown
A_33_P3248077	-0.146486	Compromised	0.146485	Compromised	-4.7e-07	0.205113	Compromised	0.393381	Compromised	0.299247	0.227829	1.76	1.86	2.04	2.13	A_33_P3248077	Unknown
A_33_P3248222	-1.00657	Compromised	1.00657	Compromised	-5e-07	-0.584788	Compromised	-0.368823	Compromised	-0.476805	0.684021	1.66	5.78	2.02	2.15	A_33_P3248222	Unknown
A_33_P3248774	0.0143039	Detected	-0.0143039	Detected	0	0.306767	Detected	-0.0593636	Detected	0.123702	0.569944	31.1	26.3	34.6	24.6	A_33_P3248774	Unknown
A_33_P3248939	-0.159107	Compromised	0.159107	Compromised	0	1.21351	Compromised	0.567386	Compromised	0.890448	0.131948	1.59	1.71	3.74	2.19	A_33_P3248939	Unknown
A_33_P3248948	-0.354424	Compromised	0.354424	Compromised	0	1.06391	Compromised	0.627502	Compromised	0.845705	0.179227	2.22	3.13	5.39	3.65	A_33_P3248948	Unknown
A_33_P3248997	-0.443149	Compromised	0.443149	Compromised	-5e-07	-0.0348454	Compromised	0.0911379	Compromised	0.0281463	0.955579	1.8	2.87	2.17	2.17	A_33_P3248997	Unknown
A_33_P3249002	-0.0534673	Detected	0.0534668	Detected	-4.77e-07	0.0255871	Detected	0.245399	Detected	0.135493	0.383066	9150	8500	8780	9370	A_33_P3249002	Unknown
A_33_P3249066	0.111427	Compromised	-0.111427	Compromised	0	0.884148	Compromised	0.896849	Compromised	0.890498	0.0153475	5.29	3.91	8.21	7.59	A_33_P3249066	Unknown
A_33_P3249897	-0.583851	Compromised	0.583852	Compromised	4.6e-07	-0.198606	Compromised	-0.00550842	Compromised	-0.102057	0.87895	1.77	3.43	2.1	2.2	A_33_P3249897	Unknown
A_33_P3250263	-0.638335	Compromised	0.638335	Compromised	0	-0.261217	Compromised	0.00850153	Compromised	-0.126358	0.864318	1.78	3.72	2.1	2.32	A_33_P3250263	Unknown
A_33_P3250323	0.234592	Detected	-0.234592	Detected	2.4e-07	-0.393062	Detected	-0.369259	Detected	-0.381161	0.246125	19.9	12.4	11.7	10.9	A_33_P3250323	Unknown
A_33_P3250669	-0.817009	Compromised	0.817009	Compromised	5e-07	-0.855531	Compromised	0.995673	Compromised	0.0700712	0.9599	2.51	6.72	2.22	7.34	A_33_P3250669	Unknown
A_33_P3250767	-0.217504	Detected	0.217504	Detected	0	0.0229814	Detected	-0.370888	Detected	-0.173953	0.613382	65.6	76.5	70.4	49.1	A_33_P3250767	Unknown
A_33_P3251209	-0.15473	Compromised	0.15473	Compromised	0	0.220413	Compromised	0.428467	Compromised	0.32444	0.223968	1.74	1.86	2.05	2.17	A_33_P3251209	Unknown
A_33_P3251252	-0.207716	Detected	0.207716	Detected	-2.3e-07	-0.18885	Detected	-0.472366	Compromised	-0.330608	0.319143	11.3	13	10.4	7.83	A_33_P3251252	Unknown
A_33_P3251408	-0.159107	Compromised	0.159107	Compromised	0	0.30324	Compromised	0.567386	Compromised	0.435313	0.169911	1.59	1.71	1.99	2.19	A_33_P3251408	Unknown
A_33_P3251412	-0.146266	Compromised	0.146266	Compromised	-4.8e-07	1.09079	Compromised	0.392184	Compromised	0.741486	0.189336	1.77	1.87	3.79	2.14	A_33_P3251412	Unknown
A_33_P3251557	0.877076	Compromised	-0.877076	Compromised	0	0.332654	Compromised	-0.349545	Compromised	-0.00844503	0.993655	7	1.79	4.36	2.49	A_33_P3251557	Unknown
A_33_P3251598	0.319329	Compromised	-0.319329	Compromised	0	-0.19693	Compromised	1.19251	Compromised	0.497792	0.581823	4.44	2.46	2.82	6.77	A_33_P3251598	Unknown
A_33_P3251868	-0.195694	Compromised	0.195695	Compromised	4.7e-07	0.212799	Compromised	0.385868	Compromised	0.299333	0.296746	1.75	1.98	2.11	2.18	A_33_P3251868	Unknown
A_33_P3251916	-0.406353	Compromised	0.406353	Compromised	0	-0.00471306	Compromised	0.199273	Compromised	0.0972798	0.837983	1.65	2.5	1.98	2.09	A_33_P3251916	Unknown
A_33_P3252134	-0.0233853	Detected	0.0233853	Detected	0	-0.128932	Detected	-0.0550373	Detected	-0.0919845	0.170101	835	744	705	680	A_33_P3252134	Unknown
A_33_P3252191	0.122593	Detected	-0.122593	Detected	0	-0.364406	Detected	0.169901	Detected	-0.0972524	0.772198	108	78.6	70	92.9	A_33_P3252191	Unknown
A_33_P3252279	-0.16467	Compromised	0.16467	Compromised	0	0.258304	Compromised	0.486467	Compromised	0.372386	0.204139	1.79	1.94	2.18	2.34	A_33_P3252279	Unknown
A_33_P3252441	0.227325	Detected	-0.227325	Compromised	2.4e-07	-1.26442	Compromised	0.310171	Compromised	-0.477126	0.619294	9.04	5.69	2.92	7.97	A_33_P3252441	Unknown
A_33_P3252444	0.528729	Compromised	-0.528729	Compromised	0	-0.385777	Compromised	-0.135465	Compromised	-0.260621	0.678799	4.15	1.72	2	2.18	A_33_P3252444	Unknown
A_33_P3252594	-0.119858	Detected	0.119858	Detected	0	-0.0116265	Detected	-0.252605	Detected	-0.132116	0.518293	43.2	44	42.3	32.8	A_33_P3252594	Unknown
A_33_P3252685	-0.161237	Compromised	0.161236	Compromised	-4.7e-07	0.229556	Compromised	0.434974	Compromised	0.332265	0.224333	1.78	1.92	2.12	2.24	A_33_P3252685	Unknown
A_33_P3253124	0.167344	Compromised	-0.167344	Compromised	-4.8e-07	-0.0377831	Compromised	0.221036	Compromised	0.0916264	0.707156	2.5	1.71	1.97	2.16	A_33_P3253124	Unknown
A_33_P3253179	0.14555	Compromised	-0.14555	Compromised	-4.8e-07	-0.0226517	Compromised	0.150417	Compromised	0.0638826	0.742247	2.61	1.84	2.11	2.18	A_33_P3253179	Unknown
A_33_P3253304	-0.534427	Compromised	0.534427	Compromised	0	-0.250705	Compromised	0.585772	Compromised	0.167534	0.828036	1.89	3.42	2.09	3.42	A_33_P3253304	Unknown
A_33_P3253420	-0.154584	Compromised	0.154584	Compromised	-4.8e-07	0.276803	Compromised	1.3991	Compromised	0.837952	0.286619	1.6	1.71	1.96	3.91	A_33_P3253420	Unknown
A_33_P3253717	-0.149572	Compromised	0.149572	Compromised	0	0.291357	Compromised	0.473648	Compromised	0.382502	0.160635	1.63	1.73	2.01	2.09	A_33_P3253717	Unknown
A_33_P3253812	0.621063	Detected	-0.621063	Compromised	2.4e-07	1.13065	Detected	0.401743	Compromised	0.766197	0.398788	13.3	4.85	17.2	9.51	A_33_P3253812	Unknown
A_33_P3253832	-0.0326552	Detected	0.0326548	Detected	-4.78e-07	0.0306616	Detected	0.225807	Detected	0.128234	0.338836	2360	2130	2240	2350	A_33_P3253832	Unknown
A_33_P3253892	-0.130275	Compromised	0.130275	Compromised	-4.8e-07	0.244398	Compromised	0.370381	Compromised	0.307389	0.167597	1.8	1.86	2.12	2.12	A_33_P3253892	Unknown
A_33_P3253902	-1.0409	Compromised	1.0409	Compromised	0	-0.656932	Compromised	1.01474	Compromised	0.178904	0.90566	1.78	6.5	2.11	6.16	A_33_P3253902	Unknown
A_33_P3254375	0.300579	Detected	-0.300579	Compromised	2.3e-07	-0.12695	Compromised	-0.0173511	Compromised	-0.0721507	0.835299	11.8	6.71	7.97	7.88	A_33_P3254375	Unknown
A_33_P3254580	0.00925589	Compromised	-0.00925541	Compromised	4.77e-07	-0.990301	Compromised	-0.786697	Compromised	-0.888499	0.0129794	4.38	3.73	1.99	2.1	A_33_P3254580	Unknown
A_33_P3254675	-0.222952	Compromised	0.222952	Compromised	0	0.186182	Compromised	0.392134	Compromised	0.289158	0.360163	1.6	1.88	1.93	2.04	A_33_P3254675	Unknown
A_33_P3254831	0.00362802	Detected	-0.00362825	Detected	-2.385e-07	0.537253	Detected	0.0739484	Detected	0.305601	0.317923	12.7	10.9	16.7	11.1	A_33_P3254831	Unknown
A_33_P3255046	-0.00983763	Detected	0.00983715	Detected	-4.76e-07	-0.0282755	Detected	-0.0704145	Detected	-0.049345	0.167857	2230	1950	2000	1780	A_33_P3255046	Unknown
A_33_P3255056	0.013793	Compromised	-0.013793	Compromised	0	-0.297739	Compromised	0.189323	Compromised	-0.0542082	0.844761	7.35	6.22	5.38	6.91	A_33_P3255056	Unknown
A_33_P3255065	-0.152637	Compromised	0.152637	Compromised	0	0.288765	Compromised	0.489799	Compromised	0.389282	0.166906	1.67	1.78	2.06	2.17	A_33_P3255065	Unknown
A_33_P3255070	-0.148572	Compromised	0.148573	Compromised	4.8e-07	0.228381	Compromised	0.446558	Compromised	0.337469	0.208599	1.67	1.77	1.97	2.1	A_33_P3255070	Unknown
A_33_P3255359	-0.15062	Compromised	0.15062	Compromised	-4.8e-07	0.282433	Compromised	0.487586	Compromised	0.385009	0.168989	1.59	1.69	1.95	2.06	A_33_P3255359	Unknown
A_33_P3255677	-1.14294	Compromised	1.14294	Compromised	2e-07	1.61421	Detected	-0.627122	Compromised	0.493546	0.786979	1.84	7.74	11.3	2.19	A_33_P3255677	Unknown
A_33_P3255824	-0.145623	Compromised	0.145623	Compromised	0	0.260463	Compromised	0.465616	Compromised	0.363039	0.178412	1.62	1.71	1.95	2.06	A_33_P3255824	Unknown
A_33_P3256355	0.195607	Detected	-0.195607	Detected	0	0.448945	Detected	-0.063164	Detected	0.192891	0.61019	44.7	29.4	48.4	31.1	A_33_P3256355	Unknown
A_33_P3256480	0.0128477	Detected	-0.0128477	Detected	0	-0.299461	Detected	-0.877945	Detected	-0.588703	0.179043	190	161	139	85.3	A_33_P3256480	Unknown
A_33_P3256565	-0.564979	Detected	0.564979	Detected	-2.4e-07	1.15287	Detected	-0.50756	Compromised	0.322656	0.778452	9.27	17.5	27.7	8.03	A_33_P3256565	Unknown
A_33_P3256655	-0.144708	Compromised	0.144708	Compromised	-4.8e-07	0.24091	Compromised	1.64872	Compromised	0.944817	0.319117	1.66	1.75	1.97	4.79	A_33_P3256655	Unknown
A_33_P3256883	-0.584159	Compromised	0.584159	Compromised	5e-07	-0.372574	Compromised	-0.279306	Compromised	-0.32594	0.633999	2.12	4.11	2.23	2.18	A_33_P3256883	Unknown
A_33_P3256888	0.212981	Detected	-0.212981	Detected	0	0.346253	Detected	-0.759089	Detected	-0.206418	0.760725	27.1	17.4	27	11.5	A_33_P3256888	Unknown
A_33_P3257179	-0.0655031	Compromised	0.0655026	Compromised	-4.8e-07	0.623392	Compromised	-0.598784	Compromised	0.0123041	0.985845	3.79	3.58	5.55	2.18	A_33_P3257179	Unknown
A_33_P3257479	0.00508189	Detected	-0.00508189	Detected	0	-0.1012	Detected	-0.688335	Detected	-0.394768	0.310976	23.7	20.3	20	12.2	A_33_P3257479	Unknown
A_33_P3257755	-0.0680072	Detected	0.0680072	Detected	0	-0.0363171	Detected	-0.440849	Detected	-0.238583	0.379822	518	491	481	333	A_33_P3257755	Unknown
A_33_P3258417	-0.169387	Detected	0.169387	Detected	0	0.00455093	Detected	-0.439958	Detected	-0.217703	0.517491	24.2	26.4	24.8	16.7	A_33_P3258417	Unknown
A_33_P3258561	-0.151593	Compromised	0.151593	Compromised	4.8e-07	0.276519	Compromised	0.456695	Compromised	0.366607	0.17317	1.71	1.82	2.09	2.17	A_33_P3258561	Unknown
A_33_P3258727	-0.144049	Compromised	0.144049	Compromised	4.8e-07	0.208387	Compromised	0.4201	Compromised	0.314244	0.220842	1.69	1.78	1.96	2.08	A_33_P3258727	Unknown
A_33_P3258732	-0.144266	Compromised	0.144266	Compromised	0	0.267358	Compromised	0.462715	Compromised	0.365036	0.17114	1.68	1.77	2.03	2.13	A_33_P3258732	Unknown
A_33_P3258752	-0.159107	Compromised	0.159107	Compromised	0	0.288668	Compromised	0.55415	Compromised	0.421409	0.178987	1.59	1.71	1.97	2.17	A_33_P3258752	Unknown
A_33_P3258846	0.137836	Detected	-0.137836	Detected	0	-0.0816557	Detected	-0.257639	Detected	-0.169647	0.408512	414	295	323	262	A_33_P3258846	Unknown
A_33_P3259239	-0.0812407	Compromised	0.0812402	Compromised	-4.74e-07	-0.782979	Compromised	1.07377	Compromised	0.145398	0.890343	3.76	3.63	2.1	6.97	A_33_P3259239	Unknown
A_33_P3259303	0.100897	Compromised	-0.100897	Compromised	0	0.0213223	Compromised	0.274063	Compromised	0.147692	0.457483	2.28	1.71	1.96	2.14	A_33_P3259303	Unknown
A_33_P3259560	-0.232312	Compromised	0.232312	Compromised	0	0.265543	Compromised	-0.620937	Compromised	-0.177697	0.756474	7.25	8.63	9.3	4.61	A_33_P3259560	Unknown
A_33_P3259750	-0.159107	Compromised	0.159107	Compromised	0	0.295972	Compromised	0.567386	Compromised	0.431679	0.175033	1.59	1.71	1.98	2.19	A_33_P3259750	Unknown
A_33_P3259954	-0.33145	Compromised	0.33145	Compromised	-5e-07	0.0838647	Compromised	0.230121	Compromised	0.156993	0.689144	1.75	2.39	2.12	2.15	A_33_P3259954	Unknown
A_33_P3260021	-0.115437	Detected	0.115437	Detected	0	-0.132782	Detected	-0.683553	Detected	-0.408168	0.305016	24.4	24.7	21.9	13.7	A_33_P3260021	Unknown
A_33_P3260034	0.0367777	Detected	-0.0367777	Detected	0	-0.659667	Detected	-1.15908	Detected	-0.909374	0.0691422	35.5	29.1	19.9	12.9	A_33_P3260034	Unknown
A_33_P3260263	-0.144486	Compromised	0.144485	Compromised	-4.8e-07	0.239772	Compromised	0.443758	Compromised	0.341765	0.193018	1.67	1.76	1.98	2.09	A_33_P3260263	Unknown
A_33_P3260455	0.0812066	Detected	-0.0812066	Detected	0	0.0602281	Detected	0.0541704	Detected	0.0571992	0.554422	1060	817	949	866	A_33_P3260455	Unknown
A_33_P3260868	-0.121809	Compromised	0.121809	Compromised	-4.76e-07	0.256623	Compromised	0.329658	Compromised	0.293141	0.147621	1.88	1.92	2.22	2.14	A_33_P3260868	Unknown
A_33_P3261024	-0.649066	Compromised	0.649066	Compromised	-4.5e-07	0.0434041	Compromised	-0.454139	Compromised	-0.205367	0.795503	2.97	6.3	4.36	2.83	A_33_P3261024	Unknown
A_33_P3261074	0.273645	Compromised	-0.273645	Compromised	0	0.761962	Compromised	1.14639	Compromised	0.954174	0.104013	2.88	1.7	3.67	4.39	A_33_P3261074	Unknown
A_33_P3261097	0.132998	Detected	-0.132998	Compromised	2.4e-07	0.0109522	Detected	-0.787921	Compromised	-0.388485	0.453541	12.1	8.68	10.1	5.32	A_33_P3261097	Unknown
A_33_P3261192	0.32151	Compromised	-0.32151	Compromised	0	-0.188041	Compromised	0.0417786	Compromised	-0.0731311	0.850251	3.15	1.74	2.01	2.16	A_33_P3261192	Unknown
A_33_P3261308	-0.146932	Compromised	0.146931	Compromised	-4.8e-07	0.206942	Compromised	0.854623	Compromised	0.530782	0.274093	1.74	1.84	2.02	2.9	A_33_P3261308	Unknown
A_33_P3261428	-0.164984	Compromised	0.164984	Compromised	0	0.232598	Compromised	0.431227	Compromised	0.331913	0.226922	1.78	1.93	2.13	2.24	A_33_P3261428	Unknown
A_33_P3261640	0.264396	Detected	-0.264396	Detected	0	-0.02935	Detected	-0.0140703	Detected	-0.0217102	0.94206	47.5	28.4	35.2	32.6	A_33_P3261640	Unknown
A_33_P3261706	-0.372548	Compromised	0.372547	Compromised	-4.8e-07	-0.42576	Compromised	-0.20998	Compromised	-0.31787	0.498596	2.49	3.6	2.18	2.32	A_33_P3261706	Unknown
A_33_P3262022	0.438571	Detected	-0.438571	Detected	0	-0.252249	Detected	-0.477023	Detected	-0.364636	0.505125	24.7	11.6	13.9	10.9	A_33_P3262022	Unknown
A_33_P3262074	-0.129769	Compromised	0.129769	Compromised	0	0.343256	Compromised	0.801083	Compromised	0.572169	0.161706	1.84	1.9	2.32	2.92	A_33_P3262074	Unknown
A_33_P3262108	-0.0155921	Compromised	0.0155916	Compromised	-4.77e-07	0.961893	Compromised	1.50706	Compromised	1.23448	0.0455972	1.94	1.71	3.47	4.64	A_33_P3262108	Unknown
A_33_P3262128	-0.142009	Compromised	0.142008	Compromised	-4.8e-07	0.267669	Compromised	0.400315	Compromised	0.333992	0.166791	1.79	1.88	2.16	2.17	A_33_P3262128	Unknown
A_33_P3262167	-0.00189495	Compromised	0.00189543	Compromised	4.768e-07	-0.978225	Compromised	-0.182994	Compromised	-0.58061	0.28167	4.44	3.84	2.05	3.26	A_33_P3262167	Unknown
A_33_P3262217	-0.746676	Compromised	0.746676	Compromised	0	-0.0307612	Compromised	-0.276145	Compromised	-0.153453	0.858054	1.89	4.59	2.82	2.18	A_33_P3262217	Unknown
A_33_P3262327	0.0388424	Detected	-0.0388424	Detected	0	-0.170941	Detected	-0.748657	Detected	-0.459799	0.255391	56.4	46.1	44.3	27.2	A_33_P3262327	Unknown
A_33_P3262366	-0.154296	Compromised	0.154296	Compromised	0	0.282749	Compromised	0.493621	Compromised	0.388185	0.173392	1.61	1.72	1.98	2.1	A_33_P3262366	Unknown
A_33_P3262440	0.171575	Detected	-0.171575	Compromised	-2.3e-07	-0.841823	Compromised	-1.46745	Compromised	-1.15464	0.0836699	11	7.48	4.95	2.94	A_33_P3262440	Unknown
A_33_P3262537	-0.593263	Compromised	0.593263	Compromised	2.5e-07	0.178038	Compromised	-1.38261	Compromised	-0.602288	0.601517	4.36	8.56	6.76	2.1	A_33_P3262537	Unknown
A_33_P3262600	-0.546567	Compromised	0.546567	Compromised	0	-0.143506	Compromised	0.800958	Compromised	0.328726	0.693666	1.69	3.11	2.03	3.58	A_33_P3262600	Unknown
A_33_P3262704	-0.157195	Compromised	0.157196	Compromised	4.8e-07	0.225515	Compromised	0.41148	Compromised	0.318498	0.223299	1.79	1.92	2.12	2.21	A_33_P3262704	Unknown
A_33_P3263198	-0.156678	Compromised	0.156678	Compromised	0	0.711966	Compromised	0.498994	Compromised	0.60548	0.0855199	1.67	1.79	2.77	2.19	A_33_P3263198	Unknown
A_33_P3263202	-0.351647	Compromised	0.351647	Compromised	0	-0.0667234	Compromised	0.144567	Compromised	0.0389218	0.925254	1.78	2.5	1.97	2.09	A_33_P3263202	Unknown
A_33_P3263274	0.01123	Detected	-0.0112305	Detected	-4.77e-07	-0.034483	Detected	0.282816	Detected	0.124166	0.516714	6170	5240	5430	6200	A_33_P3263274	Unknown
A_33_P3263293	-0.276963	Compromised	0.276963	Compromised	-4.7e-07	-0.2432	Compromised	-0.0603547	Compromised	-0.151778	0.654668	2.14	2.71	1.99	2.07	A_33_P3263293	Unknown
A_33_P3263512	-0.0060029	Detected	0.00600243	Detected	-4.77e-07	-0.0595913	Detected	0.0149927	Detected	-0.0222993	0.614771	9140	7950	8000	7720	A_33_P3263512	Unknown
A_33_P3263747	-0.154332	Detected	0.154332	Detected	0	-0.0157261	Detected	-0.274682	Detected	-0.145204	0.545905	117	125	117	89.6	A_33_P3263747	Unknown
A_33_P3263989	0.150994	Detected	-0.150994	Detected	0	-0.00606632	Detected	0.213026	Detected	0.10348	0.634844	313	219	255	272	A_33_P3263989	Unknown
A_33_P3264399	-0.0435205	Compromised	0.0435205	Compromised	0	0.410587	Compromised	0.262395	Compromised	0.336491	0.0594592	5.85	5.36	7.28	6.02	A_33_P3264399	Unknown
A_33_P3264424	0.0720086	Detected	-0.0720086	Detected	0	-0.230092	Detected	0.0216331	Detected	-0.104229	0.546902	77.5	60.5	57.1	62.3	A_33_P3264424	Unknown
A_33_P3264533	-0.143622	Compromised	0.143622	Compromised	4.8e-07	0.263632	Compromised	0.451307	Compromised	0.35747	0.172582	1.71	1.8	2.06	2.15	A_33_P3264533	Unknown
A_33_P3264746	-0.0155203	Detected	0.0155203	Detected	0	0.034858	Detected	-0.219101	Detected	-0.0921214	0.546237	1180	1040	1110	853	A_33_P3264746	Unknown
A_33_P3264940	-0.800931	Compromised	0.800931	Compromised	0	-0.400585	Compromised	-0.313951	Compromised	-0.357268	0.699592	1.86	4.87	2.23	2.17	A_33_P3264940	Unknown
A_33_P3264955	0.00303483	Detected	-0.00303483	Detected	0	-0.0993674	Detected	-0.122961	Detected	-0.111164	0.0117951	1560	1340	1320	1190	A_33_P3264955	Unknown
A_33_P3264960	-0.485811	Detected	0.485811	Detected	0	0.0711982	Detected	0.666667	Detected	0.368933	0.583712	10.7	18.1	14.3	19.8	A_33_P3264960	Unknown
A_33_P3265205	0.0261397	Compromised	-0.0261402	Compromised	-4.77e-07	0.451423	Compromised	0.339638	Compromised	0.39553	0.0234822	2.32	1.93	2.83	2.4	A_33_P3265205	Unknown
A_33_P3265249	-0.146266	Compromised	0.146266	Compromised	-4.8e-07	0.211234	Compromised	0.39891	Compromised	0.305072	0.221257	1.77	1.87	2.06	2.15	A_33_P3265249	Unknown
A_33_P3265254	-0.280024	Compromised	0.280023	Compromised	-4.7e-07	0.746531	Compromised	0.229187	Compromised	0.487859	0.329022	3.68	4.68	6.81	4.36	A_33_P3265254	Unknown
A_33_P3265260	0.147773	Compromised	-0.147774	Compromised	-4.7e-07	-0.00828743	Compromised	1.04107	Compromised	0.516394	0.443455	2.49	1.75	2.03	3.85	A_33_P3265260	Unknown
A_33_P3265264	-0.166602	Compromised	0.166603	Compromised	4.8e-07	0.237815	Compromised	0.464258	Compromised	0.351037	0.223511	1.73	1.88	2.08	2.23	A_33_P3265264	Unknown
A_33_P3265419	0.204641	Detected	-0.204641	Compromised	0	-0.196587	Compromised	-1.83261	Compromised	-1.0146	0.351989	10.7	6.95	7.36	2.17	A_33_P3265419	Unknown
A_33_P3265539	-0.426975	Compromised	0.426974	Compromised	-4.7e-07	-0.473539	Compromised	0.294659	Compromised	-0.0894403	0.890542	4.4	6.86	3.87	6.04	A_33_P3265539	Unknown
A_33_P3265624	-0.156678	Compromised	0.156678	Compromised	0	0.256435	Compromised	0.498994	Compromised	0.377714	0.196864	1.67	1.79	2.02	2.19	A_33_P3265624	Unknown
A_33_P3265866	0.375237	Detected	-0.375237	Detected	0	-0.722496	Detected	-0.691933	Detected	-0.707215	0.200377	58.9	30.2	25	23.4	A_33_P3265866	Unknown
A_33_P3265935	-0.221625	Compromised	0.221624	Compromised	-4.8e-07	-0.611227	Compromised	0.887989	Compromised	0.138381	0.875791	4.86	5.7	3.37	8.73	A_33_P3265935	Unknown
A_33_P3266022	0.355603	Detected	-0.355602	Detected	2.4e-07	0.104796	Detected	0.290486	Detected	0.197641	0.644572	27.9	14.7	21.3	22.2	A_33_P3266022	Unknown
A_33_P3266091	-0.15639	Compromised	0.15639	Compromised	0	0.837826	Compromised	0.443802	Compromised	0.640814	0.125681	1.68	1.8	3.04	2.12	A_33_P3266091	Unknown
A_33_P3266195	-0.130669	Compromised	0.130669	Compromised	0	0.26143	Compromised	0.380559	Compromised	0.320995	0.154933	1.77	1.83	2.11	2.1	A_33_P3266195	Unknown
A_33_P3266609	0.145261	Detected	-0.145261	Compromised	-2.4e-07	0.265527	Compromised	0.851222	Detected	0.558374	0.229739	9.5	6.7	9.38	12.9	A_33_P3266609	Unknown
A_33_P3266614	-0.11962	Detected	0.11962	Detected	0	0.199558	Detected	0.246252	Detected	0.222905	0.208912	1650	1680	1870	1770	A_33_P3266614	Unknown
A_33_P3266889	-0.810894	Compromised	0.810894	Detected	-2e-07	0.703341	Detected	-0.0514476	Compromised	0.325947	0.750464	5.01	13.3	13	7.06	A_33_P3266889	Unknown
A_33_P3267150	0.344573	Detected	-0.344573	Compromised	-2.4e-07	0.399655	Detected	0.145215	Detected	0.272435	0.535537	16	8.56	15.1	11.6	A_33_P3267150	Unknown
A_33_P3268161	-0.142202	Compromised	0.142202	Compromised	0	0.221109	Compromised	0.401541	Compromised	0.311325	0.205752	1.78	1.87	2.08	2.16	A_33_P3268161	Unknown
A_33_P3268167	-0.0680673	Detected	0.0680673	Detected	0	-0.0761116	Detected	-0.675268	Detected	-0.37569	0.345912	269	255	243	147	A_33_P3268167	Unknown
A_33_P3268219	-0.150417	Compromised	0.150417	Compromised	-2.4e-07	0.674836	Compromised	-1.11613	Compromised	-0.220645	0.830659	6.71	7.13	10.8	2.86	A_33_P3268219	Unknown
A_33_P3268294	-0.357071	Compromised	0.357071	Compromised	0	0.0907035	Compromised	0.349523	Compromised	0.220113	0.6208	1.59	2.25	1.97	2.16	A_33_P3268294	Unknown
A_33_P3268318	0.0395741	Detected	-0.0395741	Detected	0	0.288058	Detected	0.428396	Detected	0.358227	0.0470333	27.8	22.7	30	30.3	A_33_P3268318	Unknown
A_33_P3268395	-0.152905	Compromised	0.152905	Compromised	4.7e-07	1.33518	Compromised	0.471354	Compromised	0.903265	0.187448	1.66	1.77	4.23	2.13	A_33_P3268395	Unknown
A_33_P3269373	-0.1346	Compromised	0.1346	Compromised	0	0.257499	Compromised	0.410576	Compromised	0.334037	0.163682	1.77	1.84	2.11	2.15	A_33_P3269373	Unknown
A_33_P3269380	-0.172847	Detected	0.172847	Detected	0	0.147962	Detected	-1.04101	Detected	-0.446526	0.545677	36.4	39.9	41.3	16.6	A_33_P3269380	Unknown
A_33_P3269528	0.04615	Detected	-0.0461502	Compromised	-2.38e-07	0.249204	Compromised	-1.81946	Compromised	-0.785128	0.52744	9.85	7.97	10.3	2.25	A_33_P3269528	Unknown
A_33_P3270417	-0.265886	Compromised	0.265887	Compromised	4.8e-07	0.135754	Compromised	0.31041	Compromised	0.223082	0.50898	1.7	2.12	2.04	2.11	A_33_P3270417	Unknown
A_33_P3270474	-0.234969	Compromised	0.234969	Compromised	0	0.172986	Compromised	0.234552	Compromised	0.203769	0.480475	1.9	2.27	2.29	2.19	A_33_P3270474	Unknown
A_33_P3270593	-0.0965095	Detected	0.0965095	Detected	0	-0.0873961	Detected	-0.195447	Detected	-0.141422	0.329339	43.1	42.5	39.4	33.5	A_33_P3270593	Unknown
A_33_P3270639	-0.0791388	Detected	0.0791388	Detected	0	0.212818	Detected	-1.41442	Compromised	-0.600802	0.538859	10.7	10.3	11.9	3.53	A_33_P3270639	Unknown
A_33_P3271038	-0.292041	Compromised	0.292041	Compromised	-4.8e-07	-1.39671	Compromised	-1.17807	Compromised	-1.28739	0.0539647	4.64	6	1.96	2.09	A_33_P3271038	Unknown
A_33_P3271121	0.0488775	Detected	-0.0488775	Detected	0	-0.0344532	Detected	0.101095	Detected	0.0333211	0.728612	526	424	451	454	A_33_P3271121	Unknown
A_33_P3271126	0.0241053	Detected	-0.0241053	Detected	0	-0.201838	Detected	-0.399692	Detected	-0.300765	0.0980448	730	609	567	453	A_33_P3271126	Unknown
A_33_P3271187	0.180884	Detected	-0.180884	Detected	0	-0.855435	Detected	-1.30655	Compromised	-1.08099	0.0646748	28.9	19.4	12.8	8.58	A_33_P3271187	Unknown
A_33_P3271885	-0.237983	Compromised	0.237983	Detected	0	-0.345669	Compromised	0.228809	Compromised	-0.0584301	0.889911	7.71	9.25	6.5	8.87	A_33_P3271885	Unknown
A_33_P3272456	0.0132136	Compromised	-0.0132132	Compromised	4.765e-07	0.137022	Compromised	0.335518	Compromised	0.23627	0.142242	1.96	1.66	1.94	2.04	A_33_P3272456	Unknown
A_33_P3272513	0.00172591	Detected	-0.00172591	Detected	0	-0.442492	Detected	-0.61459	Detected	-0.528541	0.025506	33.7	29	22.5	18.3	A_33_P3272513	Unknown
A_33_P3272668	-0.153177	Compromised	0.153177	Compromised	0	0.291532	Compromised	0.499978	Compromised	0.395755	0.166181	1.65	1.76	2.04	2.16	A_33_P3272668	Unknown
A_33_P3272952	-1.2487	Compromised	1.2487	Compromised	2e-07	-0.250437	Compromised	0.9831	Compromised	0.366331	0.817143	1.78	8.67	3.23	6.96	A_33_P3272952	Unknown
A_33_P3273118	-0.121729	Compromised	0.121729	Compromised	0	0.261989	Compromised	1.01941	Compromised	0.640699	0.248559	1.89	1.93	2.24	3.47	A_33_P3273118	Unknown
A_33_P3273752	-0.699468	Compromised	0.699468	Compromised	0	-0.216908	Compromised	-0.109784	Compromised	-0.163346	0.837539	1.82	4.14	2.31	2.28	A_33_P3273752	Unknown
A_33_P3273767	-0.0117631	Compromised	0.0117636	Compromised	4.77e-07	0.133664	Compromised	0.245972	Compromised	0.189818	0.0804825	2.11	1.85	2.12	2.1	A_33_P3273767	Unknown
A_33_P3273802	-0.150353	Compromised	0.150353	Compromised	0	0.281034	Compromised	1.83397	Compromised	1.0575	0.312981	1.6	1.7	1.96	5.27	A_33_P3273802	Unknown
A_33_P3274001	-0.367625	Detected	0.367625	Detected	0	-0.570454	Detected	-0.608272	Detected	-0.589363	0.250516	48.4	69.5	38.2	34.1	A_33_P3274001	Unknown
A_33_P3274006	-0.161327	Compromised	0.161328	Compromised	4.8e-07	0.269167	Compromised	0.511726	Compromised	0.390447	0.192711	1.65	1.78	2.02	2.19	A_33_P3274006	Unknown
A_33_P3274080	0.0950854	Detected	-0.0950854	Detected	0	-0.273269	Detected	-0.152532	Detected	-0.2129	0.199293	78.3	59.2	55.1	54.9	A_33_P3274080	Unknown
A_33_P3274090	-0.00822163	Detected	0.00822163	Detected	0	-1.35002	Compromised	-0.142622	Detected	-0.74632	0.341889	14.9	13	5.34	11.3	A_33_P3274090	Unknown
A_33_P3274184	0.6195	Compromised	-0.619501	Compromised	-2.4e-07	0.109899	Compromised	-0.418474	Compromised	-0.154287	0.840094	8.51	3.11	5.43	3.45	A_33_P3274184	Unknown
A_33_P3274189	-0.30518	Detected	0.30518	Detected	0	0.113185	Detected	-0.0645368	Detected	0.0243239	0.945967	24.3	32	29.5	23.9	A_33_P3274189	Unknown
A_33_P3274204	0.0248952	Compromised	-0.0248957	Compromised	-4.77e-07	0.0379696	Compromised	0.248842	Compromised	0.143406	0.316637	2.16	1.8	1.98	2.1	A_33_P3274204	Unknown
A_33_P3274209	-0.0662308	Compromised	0.0662308	Compromised	0	0.135262	Compromised	0.308331	Compromised	0.221797	0.178774	2.02	1.91	2.11	2.18	A_33_P3274209	Unknown
A_33_P3274763	-0.851253	Compromised	0.851253	Compromised	0	0.291826	Compromised	1.91056	Compromised	1.10119	0.447469	1.61	4.52	3.23	9.09	A_33_P3274763	Unknown
A_33_P3275163	-0.0853345	Detected	0.0853345	Detected	0	-0.203717	Detected	-0.184648	Detected	-0.194182	0.152135	61.9	60.1	51.8	48.1	A_33_P3275163	Unknown
A_33_P3275415	-0.26375	Detected	0.26375	Detected	0	0.114825	Detected	0.0796707	Detected	0.0972476	0.748238	64.1	79.7	75.7	67.7	A_33_P3275415	Unknown
A_33_P3275651	0.491272	Compromised	-0.491272	Compromised	0	1.02463	Compromised	0.908596	Compromised	0.966615	0.18991	3.94	1.72	5.18	4.38	A_33_P3275651	Unknown
A_33_P3275826	-0.112761	Detected	0.112761	Detected	0	0.0258446	Detected	-0.182485	Detected	-0.07832	0.660645	117000	118000	117000	92800	A_33_P3275826	Unknown
A_33_P3276062	0.0982237	Compromised	-0.0982242	Compromised	-4.74e-07	0.119745	Compromised	-0.640404	Compromised	-0.260329	0.575439	4.49	3.38	4.14	2.24	A_33_P3276062	Unknown
A_33_P3276087	-0.12428	Compromised	0.12428	Compromised	4.74e-07	-1.50687	Compromised	-0.868128	Compromised	-1.1875	0.0741411	6.86	7.03	2.39	3.41	A_33_P3276087	Unknown
A_33_P3276217	-0.150353	Compromised	0.150353	Compromised	4.8e-07	0.208301	Compromised	0.402997	Compromised	0.305649	0.230049	1.76	1.87	2.05	2.15	A_33_P3276217	Unknown
A_33_P3276222	0.36249	Detected	-0.36249	Detected	0	-0.247185	Detected	-0.106135	Detected	-0.17666	0.67957	640	334	381	385	A_33_P3276222	Unknown
A_33_P3276376	-0.199505	Compromised	0.199505	Compromised	4.8e-07	0.543253	Compromised	-0.5032	Compromised	0.0200267	0.97472	4.73	5.38	7.19	3.19	A_33_P3276376	Unknown
A_33_P3276758	0.335173	Detected	-0.335173	Detected	-2.4e-07	0.272448	Detected	-0.887363	Compromised	-0.307458	0.691273	23.8	12.9	20.7	8.49	A_33_P3276758	Unknown
A_33_P3276805	-0.154011	Compromised	0.154011	Compromised	4.8e-07	0.288601	Compromised	0.484973	Compromised	0.386787	0.16839	1.62	1.73	2	2.1	A_33_P3276805	Unknown
A_33_P3276808	-0.135638	Compromised	0.135638	Compromised	-4.8e-07	-0.376621	Compromised	-0.11696	Compromised	-0.24679	0.319217	2.68	2.79	2.06	2.26	A_33_P3276808	Unknown
A_33_P3276868	-0.118226	Compromised	0.118226	Compromised	-4.76e-07	0.263785	Compromised	0.659376	Compromised	0.461581	0.183084	1.85	1.88	2.19	2.64	A_33_P3276868	Unknown
A_33_P3276927	-0.0888758	Detected	0.0888758	Detected	0	0.0514812	Detected	-0.424227	Detected	-0.186373	0.539338	82.3	80.3	82.4	54.3	A_33_P3276927	Unknown
A_33_P3277043	-0.360171	Compromised	0.360171	Compromised	4.8e-07	-0.719723	Compromised	-0.680544	Compromised	-0.700134	0.191771	3.87	5.5	2.74	2.58	A_33_P3277043	Unknown
A_33_P3277060	-0.407711	Compromised	0.407711	Compromised	0	-0.15025	Compromised	-0.0540142	Compromised	-0.102132	0.82675	3.61	5.48	3.92	3.84	A_33_P3277060	Unknown
A_33_P3277228	0.567053	Compromised	-0.567053	Compromised	0	1.05381	Compromised	-0.300202	Compromised	0.376803	0.711154	4.58	1.8	5.83	2.09	A_33_P3277228	Unknown
A_33_P3277378	-0.0776086	Detected	0.0776084	Detected	-2.35e-07	-0.201483	Compromised	-2.0025	Compromised	-1.10199	0.347038	10.4	9.99	8.67	2.28	A_33_P3277378	Unknown
A_33_P3277679	-0.494185	Compromised	0.494185	Compromised	4.8e-07	1.54634	Compromised	1.47883	Compromised	1.51259	0.092588	1.94	3.32	7.25	6.34	A_33_P3277679	Unknown
A_33_P3277758	-0.648506	Compromised	0.648506	Detected	-2.6e-07	0.657699	Detected	0.308458	Compromised	0.483079	0.546654	5.52	11.7	12.4	8.92	A_33_P3277758	Unknown
A_33_P3277805	-0.217818	Detected	0.217818	Detected	0	-0.104413	Detected	-0.686037	Detected	-0.395225	0.390326	462	539	454	278	A_33_P3277805	Unknown
A_33_P3277952	-0.0029006	Compromised	0.00290108	Compromised	4.769e-07	0.0832376	Compromised	1.01658	Compromised	0.549906	0.35987	2.24	1.94	2.16	3.78	A_33_P3277952	Unknown
A_33_P3278152	-0.0872493	Detected	0.0872493	Detected	0	0.171007	Detected	-0.386648	Detected	-0.107821	0.7475	71.7	69.8	77.9	48.5	A_33_P3278152	Unknown
A_33_P3278159	0.0311325	Detected	-0.0311325	Detected	0	-0.0856721	Detected	0.0741255	Detected	-0.0057733	0.952446	604	499	506	518	A_33_P3278159	Unknown
A_33_P3278303	0.393378	Detected	-0.393378	Detected	0	-0.0506976	Detected	-0.496066	Detected	-0.273382	0.6068	316	158	211	142	A_33_P3278303	Unknown
A_33_P3278684	0.742624	Detected	-0.742624	Compromised	-2.3e-07	-1.43583	Compromised	-0.000607252	Compromised	-0.71822	0.558697	14.8	4.56	2.97	7.36	A_33_P3278684	Unknown
A_33_P3278714	-0.0875304	Detected	0.0875304	Detected	0	0.179743	Detected	-0.679577	Detected	-0.249917	0.626196	26.8	26.1	29.3	14.8	A_33_P3278714	Unknown
A_33_P3278896	0.0698554	Detected	-0.0698554	Detected	0	0.309224	Detected	-0.247452	Detected	0.0308862	0.924115	23.5	18.4	25.2	15.7	A_33_P3278896	Unknown
A_33_P3279181	-0.0269918	Compromised	0.0269914	Compromised	-4.77e-07	0.368429	Compromised	-0.680976	Compromised	-0.156273	0.794182	7.75	6.94	9.26	4.1	A_33_P3279181	Unknown
A_33_P3279381	-0.157195	Compromised	0.157196	Compromised	4.8e-07	0.225515	Compromised	0.417994	Compromised	0.321754	0.222985	1.79	1.92	2.12	2.22	A_33_P3279381	Unknown
A_33_P3279388	-0.154876	Compromised	0.154876	Compromised	4.7e-07	0.300203	Compromised	0.571617	Compromised	0.43591	0.168485	1.59	1.7	1.98	2.19	A_33_P3279388	Unknown
A_33_P3279392	-0.775391	Compromised	0.775391	Compromised	0	0.176593	Compromised	-0.650118	Compromised	-0.236762	0.812837	2.39	6.04	4.2	2.17	A_33_P3279392	Unknown
A_33_P3279456	-0.0281558	Detected	0.0281563	Detected	4.76e-07	0.175405	Detected	-0.02281	Detected	0.0762978	0.536111	4560	4090	4770	3810	A_33_P3279456	Unknown
A_33_P3279505	0.464989	Compromised	-0.464989	Compromised	0	-0.491418	Compromised	-0.358678	Compromised	-0.425048	0.461016	4.55	2.06	2.13	2.14	A_33_P3279505	Unknown
A_33_P3279984	-0.887047	Compromised	0.887047	Compromised	-5e-07	0.388337	Compromised	0.0121222	Compromised	0.20023	0.845729	1.81	5.34	3.98	2.81	A_33_P3279984	Unknown
A_33_P3280325	-0.689887	Compromised	0.689887	Compromised	0	-1.22153	Compromised	-0.901168	Compromised	-1.06135	0.272719	3.31	7.43	2.08	2.38	A_33_P3280325	Unknown
A_33_P3280355	0.103947	Detected	-0.103948	Detected	-4.8e-07	-0.107033	Detected	-0.369953	Detected	-0.238493	0.290692	15800	11800	12400	9470	A_33_P3280355	Unknown
A_33_P3280412	-0.450152	Compromised	0.450152	Compromised	0	-0.622695	Compromised	-0.433671	Compromised	-0.528183	0.369653	5	8.05	4.03	4.21	A_33_P3280412	Unknown
A_33_P3280502	-0.0515306	Detected	0.0515306	Detected	0	-0.101535	Detected	0.13309	Detected	0.0157776	0.913258	20.4	18.9	17.9	19.3	A_33_P3280502	Unknown
A_33_P3280709	-0.383842	Compromised	0.383842	Compromised	0	-1.27339	Compromised	-0.779317	Compromised	-1.02635	0.153514	4.14	6.08	2.03	2.62	A_33_P3280709	Unknown
A_33_P3280974	-0.151593	Compromised	0.151593	Compromised	4.8e-07	0.220212	Compromised	0.436611	Compromised	0.328411	0.219899	1.71	1.82	2.01	2.14	A_33_P3280974	Unknown
A_33_P3281176	-0.0871007	Detected	0.0871007	Detected	0	-0.445171	Detected	-0.390072	Detected	-0.417621	0.044669	41.2	40.1	29.2	27.8	A_33_P3281176	Unknown
A_33_P3281303	-0.165241	Detected	0.165241	Detected	0	-0.0114489	Detected	-0.214967	Detected	-0.113208	0.618668	18.9	20.5	19.1	15.2	A_33_P3281303	Unknown
A_33_P3281373	0.238344	Compromised	-0.238344	Compromised	0	1.1975	Compromised	0.823173	Compromised	1.01034	0.0794011	3.42	2.12	6.04	4.27	A_33_P3281373	Unknown
A_33_P3281478	-0.312685	Detected	0.312685	Detected	2.3e-07	0.175505	Detected	-0.344081	Compromised	-0.0842877	0.854942	12.4	16.5	15.8	10.1	A_33_P3281478	Unknown
A_33_P3281563	-0.142033	Compromised	0.142033	Compromised	0	0.893143	Compromised	0.482099	Compromised	0.687621	0.11054	1.59	1.67	2.96	2.04	A_33_P3281563	Unknown
A_33_P3281728	-0.141603	Compromised	0.141603	Compromised	-4.7e-07	0.265998	Compromised	0.464494	Compromised	0.365246	0.169054	1.61	1.69	1.94	2.04	A_33_P3281728	Unknown
A_33_P3281765	0.436617	Detected	-0.436618	Compromised	-4.8e-07	-0.606224	Compromised	-0.214729	Compromised	-0.410477	0.481362	11	5.18	4.85	5.83	A_33_P3281765	Unknown
A_33_P3282023	0.117698	Compromised	-0.117699	Compromised	-4.8e-07	-0.530618	Compromised	-0.324666	Compromised	-0.427642	0.111758	3.33	2.44	1.93	2.04	A_33_P3282023	Unknown
A_33_P3282213	0.301372	Detected	-0.301373	Compromised	-2.3e-07	0.981837	Detected	0.577962	Compromised	0.7799	0.164556	8.38	4.76	12.2	8.45	A_33_P3282213	Unknown
A_33_P3282354	-1.01373	Compromised	1.01373	Compromised	-5e-07	-0.25845	Compromised	-0.499524	Compromised	-0.378987	0.746097	1.8	6.33	2.76	2.14	A_33_P3282354	Unknown
A_33_P3282624	-0.144597	Compromised	0.144597	Compromised	0	0.25053	Compromised	0.350162	Compromised	0.300346	0.188513	1.85	1.95	2.21	2.17	A_33_P3282624	Unknown
A_33_P3282649	-0.281505	Compromised	0.281505	Compromised	0	0.191025	Compromised	-0.33312	Compromised	-0.0710473	0.870481	5.03	6.41	6.34	4.04	A_33_P3282649	Unknown
A_33_P3282744	-0.143834	Compromised	0.143835	Compromised	4.8e-07	0.264861	Compromised	0.452831	Compromised	0.358846	0.171973	1.7	1.79	2.05	2.14	A_33_P3282744	Unknown
A_33_P3283064	-0.0759215	Detected	0.0759215	Detected	0	-0.0304255	Detected	-0.173903	Detected	-0.102165	0.431178	144	138	135	112	A_33_P3283064	Unknown
A_33_P3283117	0.675949	Compromised	-0.675949	Compromised	0	0.507517	Compromised	-0.241557	Compromised	0.13298	0.879211	5.06	1.71	4.09	2.23	A_33_P3283117	Unknown
A_33_P3283167	0.113664	Detected	-0.113665	Detected	-4.8e-07	-0.0683031	Detected	-0.169235	Detected	-0.118769	0.44036	2660	1960	2130	1820	A_33_P3283167	Unknown
A_33_P3283350	-1.32995	Compromised	1.32995	Detected	0	-0.601564	Compromised	-1.48846	Compromised	-1.04501	0.533721	2.99	16.3	4.5	2.23	A_33_P3283350	Unknown
A_33_P3283535	-0.130405	Compromised	0.130405	Compromised	0	1.64851	Compromised	0.378288	Compromised	1.0134	0.258477	1.79	1.85	5.58	2.12	A_33_P3283535	Unknown
A_33_P3283646	-0.157323	Compromised	0.157323	Compromised	4.8e-07	-0.0905075	Compromised	0.162233	Compromised	0.0358627	0.875314	2.06	2.21	1.96	2.14	A_33_P3283646	Unknown
A_33_P3283700	-0.149066	Compromised	0.149066	Compromised	0	0.288553	Compromised	0.523987	Compromised	0.40627	0.165845	1.65	1.75	2.03	2.19	A_33_P3283700	Unknown
A_33_P3283734	-0.141184	Compromised	0.141184	Compromised	-4.8e-07	0.263403	Compromised	0.468163	Compromised	0.365783	0.17087	1.63	1.71	1.96	2.07	A_33_P3283734	Unknown
A_33_P3284117	0.0636721	Compromised	-0.0636716	Compromised	4.76e-07	0.840189	Compromised	0.307893	Compromised	0.574041	0.170839	2.14	1.69	3.33	2.11	A_33_P3284117	Unknown
A_33_P3284252	-0.14833	Compromised	0.14833	Compromised	4.8e-07	1.03259	Compromised	0.451862	Compromised	0.742224	0.150576	1.68	1.78	3.46	2.12	A_33_P3284252	Unknown
A_33_P3284295	0.333729	Compromised	-0.333728	Compromised	5e-07	-1.22242	Compromised	0.0772152	Compromised	-0.5726	0.515222	6.96	3.78	2.15	4.85	A_33_P3284295	Unknown
A_33_P3284873	-0.244745	Compromised	0.244745	Compromised	0	-0.285462	Compromised	0.418394	Compromised	0.0664656	0.891014	3.08	3.73	2.72	4.06	A_33_P3284873	Unknown
A_33_P3285097	-0.335463	Compromised	0.335463	Detected	0	0.246749	Detected	-0.229304	Compromised	0.00872278	0.985007	7.5	10.3	10.2	6.72	A_33_P3285097	Unknown
A_33_P3285371	-0.68662	Compromised	0.68662	Compromised	0	-0.265812	Compromised	-0.0136881	Compromised	-0.13975	0.859843	1.62	3.62	1.97	2.15	A_33_P3285371	Unknown
A_33_P3285764	0.242286	Compromised	-0.242286	Compromised	0	0.455942	Compromised	0.367269	Compromised	0.411605	0.236661	4.12	2.54	4.34	3.74	A_33_P3285764	Unknown
A_33_P3285769	0.000547886	Detected	-0.000548363	Detected	-4.7683e-07	-0.0442924	Detected	-0.0594854	Detected	-0.0518889	0.0208723	26800	23100	23600	21400	A_33_P3285769	Unknown
A_33_P3286101	-0.14833	Compromised	0.14833	Compromised	4.8e-07	0.22001	Compromised	0.94311	Compromised	0.58156	0.275116	1.68	1.78	1.97	2.98	A_33_P3286101	Unknown
A_33_P3286162	-0.119542	Detected	0.119542	Detected	0	0.151819	Detected	-0.207624	Detected	-0.0279024	0.908972	332	338	364	260	A_33_P3286162	Unknown
A_33_P3286499	0.165606	Compromised	-0.165606	Compromised	0	-0.844508	Compromised	-0.579697	Compromised	-0.712103	0.0783753	4.39	3.01	1.98	2.18	A_33_P3286499	Unknown
A_33_P3286699	-0.34457	Compromised	0.34457	Compromised	-4.8e-07	0.434766	Compromised	0.247142	Compromised	0.340954	0.440463	4.99	6.94	7.78	6.26	A_33_P3286699	Unknown
A_33_P3286709	-0.591983	Compromised	0.591983	Compromised	-4.6e-07	-0.631376	Compromised	0.589765	Compromised	-0.0208058	0.982703	2.24	4.39	1.98	4.23	A_33_P3286709	Unknown
A_33_P3287084	0.0571654	Detected	-0.0571654	Detected	0	-0.243514	Detected	0.0442202	Detected	-0.0996468	0.585741	32	25.5	23.6	26.4	A_33_P3287084	Unknown
A_33_P3287105	-0.0964444	Detected	0.0964444	Detected	0	-0.301404	Detected	0.319137	Detected	0.00886655	0.980707	571	563	450	634	A_33_P3287105	Unknown
A_33_P3287238	-0.143001	Compromised	0.143	Compromised	-4.7e-07	0.196518	Compromised	0.813071	Compromised	0.504795	0.275743	1.74	1.83	2	2.81	A_33_P3287238	Unknown
A_33_P3287310	-0.0413954	Detected	0.0413954	Detected	0	0.0930469	Detected	-0.703846	Detected	-0.305399	0.525479	69.4	63.4	69.2	36.5	A_33_P3287310	Unknown
A_33_P3287314	0.317507	Detected	-0.317507	Compromised	0	0.195176	Compromised	0.0916769	Compromised	0.143426	0.699329	11	6.11	9.18	7.83	A_33_P3287314	Unknown
A_33_P3287388	0.256367	Detected	-0.256367	Detected	0	0.299213	Detected	-0.40425	Detected	-0.0525184	0.914987	109	65.9	102	57.4	A_33_P3287388	Unknown
A_33_P3287897	0.146432	Detected	-0.146432	Detected	0	-0.244278	Detected	0.52525	Detected	0.140486	0.765435	26.7	18.8	18.5	28.9	A_33_P3287897	Unknown
A_33_P3288079	-1.12188	Compromised	1.12188	Detected	0	0.0489182	Compromised	-0.787065	Compromised	-0.369074	0.787017	4.21	17.2	8.61	4.42	A_33_P3288079	Unknown
A_33_P3288275	0.247708	Compromised	-0.247708	Compromised	-4.8e-07	-0.151506	Compromised	1.10397	Compromised	0.476232	0.553502	2.86	1.75	1.97	4.31	A_33_P3288275	Unknown
A_33_P3288434	-0.147619	Compromised	0.147618	Compromised	-4.7e-07	0.273574	Compromised	0.406477	Compromised	0.340025	0.1705	1.71	1.81	2.08	2.09	A_33_P3288434	Unknown
A_33_P3288814	-0.501815	Compromised	0.501815	Compromised	-4.6e-07	0.68724	Compromised	-0.176896	Compromised	0.255172	0.737106	2.81	4.86	5.82	2.93	A_33_P3288814	Unknown
A_33_P3288919	-0.159107	Compromised	0.159107	Compromised	0	0.288668	Compromised	0.55415	Compromised	0.421409	0.178987	1.59	1.71	1.97	2.17	A_33_P3288919	Unknown
A_33_P3288995	0.559019	Compromised	-0.559019	Compromised	0	-0.286152	Compromised	-0.701995	Compromised	-0.494074	0.494572	6.19	2.46	3.13	2.15	A_33_P3288995	Unknown
A_33_P3289000	0.48264	Detected	-0.48264	Compromised	2.3e-07	-1.09226	Compromised	0.116615	Compromised	-0.487823	0.592709	12.2	5.39	3.72	7.88	A_33_P3289000	Unknown
A_33_P3289093	-0.15879	Compromised	0.158791	Compromised	4.8e-07	0.287244	Compromised	0.545422	Compromised	0.416333	0.178896	1.6	1.72	1.98	2.17	A_33_P3289093	Unknown
A_33_P3289391	-0.167184	Detected	0.167184	Detected	0	0.184896	Detected	-0.479096	Detected	-0.1471	0.730526	76.5	83.2	88.7	51.3	A_33_P3289391	Unknown
A_33_P3289466	-0.149916	Detected	0.149916	Detected	0	-0.179378	Detected	-0.610771	Detected	-0.395074	0.271476	29.1	30.9	25.9	17.6	A_33_P3289466	Unknown
A_33_P3289976	-0.09729	Detected	0.09729	Detected	0	-0.0270367	Detected	-0.1884	Detected	-0.107718	0.483844	38900	38400	37100	30400	A_33_P3289976	Unknown
A_33_P3290149	0.767056	Detected	-0.767056	Compromised	0	0.7394	Compromised	0.632626	Compromised	0.686013	0.466435	8.36	2.49	7.45	6.34	A_33_P3290149	Unknown
A_33_P3290610	-0.149066	Compromised	0.149066	Compromised	0	0.288553	Compromised	0.48391	Compromised	0.386231	0.162538	1.65	1.75	2.03	2.13	A_33_P3290610	Unknown
A_33_P3291150	-0.154584	Compromised	0.154584	Compromised	-4.8e-07	0.29145	Compromised	0.542964	Compromised	0.417207	0.17134	1.6	1.71	1.98	2.16	A_33_P3291150	Unknown
A_33_P3291160	-0.386892	Detected	0.386891	Detected	-2.3e-07	0.124626	Detected	0.14246	Detected	0.133543	0.762948	13.9	20.5	18	16.7	A_33_P3291160	Unknown
A_33_P3291662	-0.149829	Compromised	0.149829	Compromised	0	0.285551	Compromised	0.523102	Compromised	0.404326	0.168751	1.62	1.72	1.99	2.15	A_33_P3291662	Unknown
A_33_P3291772	-0.237296	Compromised	0.237296	Compromised	0	1.23666	Compromised	-0.965982	Compromised	0.135338	0.91536	4.28	5.13	10.8	2.15	A_33_P3291772	Unknown
A_33_P3292158	-0.154584	Compromised	0.154584	Compromised	-4.8e-07	0.269423	Compromised	0.509175	Compromised	0.389299	0.184858	1.6	1.71	1.95	2.11	A_33_P3292158	Unknown
A_33_P3292241	0.285597	Detected	-0.285597	Detected	0	-0.209259	Detected	-0.696253	Detected	-0.452756	0.351017	48.4	28.1	31.2	20.4	A_33_P3292241	Unknown
A_33_P3292994	-0.564667	Compromised	0.564667	Detected	0	1.20233	Detected	-0.581065	Compromised	0.310633	0.796254	4.69	8.85	14.5	3.86	A_33_P3292994	Unknown
A_33_P3293138	0.271326	Detected	-0.271326	Detected	0	-2.43581	Compromised	-0.80835	Compromised	-1.62208	0.199175	17.9	10.6	2.49	7.05	A_33_P3293138	Unknown
A_33_P3293307	0.36452	Detected	-0.36452	Detected	0	-0.574643	Detected	-0.588384	Detected	-0.581514	0.251761	68.6	35.7	32.5	29.5	A_33_P3293307	Unknown
A_33_P3293466	-0.154584	Compromised	0.154584	Compromised	-4.8e-07	0.284145	Compromised	0.522786	Compromised	0.403466	0.174798	1.6	1.71	1.97	2.13	A_33_P3293466	Unknown
A_33_P3293645	0.448848	Detected	-0.448848	Compromised	-2.5e-07	0.161012	Compromised	-0.848983	Compromised	-0.343986	0.661275	12.7	5.88	9.45	4.3	A_33_P3293645	Unknown
A_33_P3293698	-0.819275	Detected	0.819275	Detected	2.4e-07	-1.86509	Compromised	0.394982	Detected	-0.735056	0.651028	8.75	23.5	3.85	16.9	A_33_P3293698	Unknown
A_33_P3293734	-0.0542815	Detected	0.0542815	Detected	0	-0.108539	Detected	-0.12006	Detected	-0.1143	0.171301	943	877	825	750	A_33_P3293734	Unknown
A_33_P3294078	0.167344	Compromised	-0.167344	Compromised	-4.8e-07	-0.0304785	Compromised	1.7446	Compromised	0.857059	0.44281	2.5	1.71	1.98	6.21	A_33_P3294078	Unknown
A_33_P3294089	-0.3117	Compromised	0.311699	Compromised	-4.7e-07	-0.309299	Compromised	0.678109	Compromised	0.184405	0.782041	2.22	2.95	2.02	3.67	A_33_P3294089	Unknown
A_33_P3294103	-0.255919	Compromised	0.25592	Compromised	4.7e-07	0.149572	Compromised	0.229959	Compromised	0.189766	0.540064	1.87	2.3	2.25	2.18	A_33_P3294103	Unknown
A_33_P3294314	0.711957	Compromised	-0.711957	Compromised	4.5e-07	0.879563	Compromised	-0.462284	Compromised	0.20864	0.850879	5.91	1.9	6.03	2.18	A_33_P3294314	Unknown
A_33_P3294342	-0.147853	Compromised	0.147853	Compromised	0	0.217986	Compromised	0.42159	Compromised	0.319788	0.21679	1.7	1.8	1.99	2.1	A_33_P3294342	Unknown
A_33_P3294415	0.0765822	Detected	-0.0765822	Compromised	0	0.533956	Detected	-1.40212	Compromised	-0.434083	0.698608	9.14	7.09	11.4	2.73	A_33_P3294415	Unknown
A_33_P3294730	-0.147853	Compromised	0.147853	Compromised	0	0.210718	Compromised	0.414704	Compromised	0.312711	0.223816	1.7	1.8	1.98	2.09	A_33_P3294730	Unknown
A_33_P3295077	-0.202945	Detected	0.202945	Detected	0	-0.0972536	Detected	-0.148148	Detected	-0.122701	0.609486	13.3	15.2	13	11.5	A_33_P3295077	Unknown
A_33_P3295623	-0.146049	Compromised	0.14605	Compromised	4.8e-07	0.231068	Compromised	1.93513	Compromised	1.0831	0.336866	1.78	1.88	2.1	6.27	A_33_P3295623	Unknown
A_33_P3295705	-0.0316093	Detected	0.0316093	Detected	0	-0.113913	Detected	-0.647439	Detected	-0.380676	0.292171	32.4	29.2	27.8	17.6	A_33_P3295705	Unknown
A_33_P3295814	-0.0809567	Detected	0.0809567	Detected	0	0.128247	Detected	-0.706637	Detected	-0.289195	0.566604	65.8	63.5	69.1	35.5	A_33_P3295814	Unknown
A_33_P3295932	0.220556	Detected	-0.220556	Detected	0	0.0881345	Detected	-0.220285	Detected	-0.0660753	0.828947	36.2	23	30	22.2	A_33_P3295932	Unknown
A_33_P3296099	-0.894552	Compromised	0.894552	Compromised	-4.8e-07	1.24178	Compromised	0.66078	Compromised	0.951282	0.418279	1.59	4.74	6.35	3.89	A_33_P3296099	Unknown
A_33_P3296313	-0.148572	Compromised	0.148573	Compromised	4.8e-07	0.271665	Compromised	0.473779	Compromised	0.372722	0.173756	1.67	1.77	2.03	2.14	A_33_P3296313	Unknown
A_33_P3296348	-0.133271	Compromised	0.133271	Compromised	4.8e-07	0.299066	Compromised	0.386575	Compromised	0.34282	0.134461	1.86	1.93	2.28	2.22	A_33_P3296348	Unknown
A_33_P3296696	-0.770083	Compromised	0.770083	Compromised	0	-0.42225	Compromised	-0.219024	Compromised	-0.320637	0.719807	1.73	4.34	2	2.11	A_33_P3296696	Unknown
A_33_P3296721	-0.208389	Detected	0.208389	Detected	-2.3e-07	-0.836193	Compromised	-1.85069	Compromised	-1.34344	0.133946	13.2	15.2	7.76	3.52	A_33_P3296721	Unknown
A_33_P3296769	-0.155127	Compromised	0.155127	Compromised	0	1.01716	Detected	-0.749939	Compromised	0.133611	0.895261	7.62	8.15	15.6	4.2	A_33_P3296769	Unknown
A_33_P3297150	0.336342	Compromised	-0.336342	Compromised	4.7e-07	-0.221502	Compromised	1.45197	Compromised	0.615233	0.565509	3.16	1.71	1.95	5.7	A_33_P3297150	Unknown
A_33_P3297280	-0.146486	Compromised	0.146485	Compromised	-4.7e-07	0.267398	Compromised	0.420222	Compromised	0.34381	0.172919	1.76	1.86	2.13	2.17	A_33_P3297280	Unknown
A_33_P3297297	-0.153683	Compromised	0.153683	Compromised	0	0.216548	Compromised	0.403357	Compromised	0.309952	0.226944	1.78	1.9	2.09	2.18	A_33_P3297297	Unknown
A_33_P3297310	-0.149664	Detected	0.149664	Detected	0	0.581693	Detected	-0.705882	Compromised	-0.0620941	0.933716	8.62	9.15	13	4.88	A_33_P3297310	Unknown
A_33_P3297360	-0.148818	Compromised	0.148818	Compromised	-4.8e-07	0.287173	Compromised	0.46183	Compromised	0.374502	0.162165	1.66	1.76	2.04	2.11	A_33_P3297360	Unknown
A_33_P3297655	-0.01932	Compromised	0.0193195	Compromised	-4.77e-07	0.14888	Compromised	0.4077	Compromised	0.27829	0.167279	1.93	1.71	1.97	2.16	A_33_P3297655	Unknown
A_33_P3297808	-0.141817	Compromised	0.141817	Compromised	0	0.898862	Compromised	0.473269	Compromised	0.686066	0.115379	1.6	1.68	2.99	2.04	A_33_P3297808	Unknown
A_33_P3297818	0.0676389	Compromised	-0.0676394	Compromised	-4.76e-07	0.0608139	Compromised	0.298908	Compromised	0.179861	0.319432	2.19	1.72	1.98	2.14	A_33_P3297818	Unknown
A_33_P3297834	-0.164054	Compromised	0.164054	Compromised	-4.8e-07	0.236257	Compromised	0.427237	Compromised	0.331747	0.22263	1.81	1.96	2.17	2.27	A_33_P3297834	Unknown
A_33_P3298251	-0.221864	Detected	0.221864	Detected	0	-0.612511	Detected	0.130856	Detected	-0.240828	0.633907	25.4	29.8	17.6	27	A_33_P3298251	Unknown
A_33_P3298267	-0.1271	Compromised	0.1271	Compromised	0	0.686742	Detected	0.128016	Compromised	0.407379	0.315647	7.64	7.86	12.2	7.59	A_33_P3298267	Unknown
A_33_P3298398	-0.158478	Compromised	0.158477	Compromised	-4.8e-07	0.278567	Compromised	0.543378	Compromised	0.410973	0.184859	1.61	1.73	1.98	2.18	A_33_P3298398	Unknown
A_33_P3298552	-0.0881841	Detected	0.0881841	Detected	0	0.0228527	Detected	-0.246238	Detected	-0.111693	0.559298	634	618	622	473	A_33_P3298552	Unknown
A_33_P3298612	1.15623	Detected	-1.15623	Compromised	0	0.864197	Detected	-0.859071	Compromised	0.00256325	0.998743	18.6	3.23	13.8	3.83	A_33_P3298612	Unknown
A_33_P3298955	0.494551	Compromised	-0.494551	Compromised	0	-0.399265	Compromised	-0.14775	Compromised	-0.273508	0.645601	4.05	1.76	1.98	2.16	A_33_P3298955	Unknown
A_33_P3298980	0.196626	Detected	-0.196626	Detected	0	0.189153	Detected	0.450488	Detected	0.319821	0.308254	40.5	26.6	36.6	40.2	A_33_P3298980	Unknown
A_33_P3299042	-0.613752	Compromised	0.613752	Detected	-2.7e-07	-0.172455	Compromised	-0.216881	Compromised	-0.194668	0.781295	6.04	12.2	7.45	6.62	A_33_P3299042	Unknown
A_33_P3299047	-0.200383	Detected	0.200383	Detected	0	0.210201	Detected	0.244144	Detected	0.227173	0.375885	67	76.3	80.9	75.9	A_33_P3299047	Unknown
A_33_P3299125	-0.255919	Compromised	0.25592	Compromised	4.7e-07	0.187541	Compromised	0.262674	Compromised	0.225107	0.475907	1.87	2.3	2.31	2.23	A_33_P3299125	Unknown
A_33_P3299130	0.111791	Detected	-0.111791	Detected	0	-0.0375664	Detected	-0.797412	Detected	-0.417489	0.40235	93.4	69	76.5	41.4	A_33_P3299130	Unknown
A_33_P3299376	-0.143834	Compromised	0.143835	Compromised	4.8e-07	0.20009	Compromised	0.411803	Compromised	0.305947	0.22882	1.7	1.79	1.96	2.08	A_33_P3299376	Unknown
A_33_P3299436	-0.0663328	Detected	0.0663328	Detected	0	0.0453062	Detected	0.00815391	Detected	0.0267301	0.735394	81000	76599.9	79500	71000	A_33_P3299436	Unknown
A_33_P3299495	0.0119429	Compromised	-0.0119424	Compromised	4.76e-07	0.207229	Compromised	-1.12682	Compromised	-0.459798	0.561908	5.74	4.87	5.97	2.17	A_33_P3299495	Unknown
A_33_P3299750	-0.0362916	Compromised	0.0362916	Compromised	0	0.171576	Compromised	0.377933	Compromised	0.274755	0.1286	1.83	1.66	1.92	2.03	A_33_P3299750	Unknown
A_33_P3299972	-0.12239	Compromised	0.12239	Compromised	-4.8e-07	0.25108	Compromised	0.363452	Compromised	0.307266	0.150033	1.81	1.85	2.13	2.11	A_33_P3299972	Unknown
A_33_P3300022	-0.154876	Compromised	0.154876	Compromised	4.7e-07	0.300203	Compromised	0.571617	Compromised	0.43591	0.168485	1.59	1.7	1.98	2.19	A_33_P3300022	Unknown
A_33_P3300032	-0.151593	Compromised	0.151593	Compromised	4.8e-07	0.213017	Compromised	0.423064	Compromised	0.31804	0.22675	1.71	1.82	2	2.12	A_33_P3300032	Unknown
A_33_P3300117	0.0940032	Detected	-0.0940032	Detected	0	-0.0339918	Detected	-0.386311	Detected	-0.210152	0.402972	24.3	18.4	20.2	14.5	A_33_P3300117	Unknown
A_33_P3300179	-0.0536406	Detected	0.0536406	Detected	0	0.415536	Detected	0.292206	Detected	0.353871	0.049422	46.6	43.3	58.6	49.3	A_33_P3300179	Unknown
A_33_P3300591	-0.142202	Compromised	0.142202	Compromised	0	0.295457	Compromised	0.414837	Compromised	0.355147	0.147861	1.78	1.87	2.19	2.18	A_33_P3300591	Unknown
A_33_P3300877	-0.0515821	Detected	0.0515821	Detected	0	-0.188611	Detected	-0.750684	Detected	-0.469647	0.241965	66.7	61.8	55.1	34.2	A_33_P3300877	Unknown
A_33_P3301095	0.125031	Detected	-0.125031	Detected	0	0.10681	Detected	-1.01513	Detected	-0.454162	0.51222	233	169	209	88	A_33_P3301095	Unknown
A_33_P3301097	0.369581	Detected	-0.369581	Compromised	0	-0.0413709	Compromised	-2.0414	Compromised	-1.04138	0.431685	16.1	8.32	11	2.52	A_33_P3301097	Unknown
A_33_P3301124	-0.38062	Compromised	0.38062	Compromised	4.8e-07	-0.594042	Compromised	-1.14203	Compromised	-0.868034	0.205399	4.48	6.55	3.51	2.2	A_33_P3301124	Unknown
A_33_P3301129	-0.0161529	Compromised	0.0161529	Compromised	0	-0.997603	Compromised	-0.0935159	Compromised	-0.545559	0.351096	5.26	4.64	2.42	4.15	A_33_P3301129	Unknown
A_33_P3301445	0.18309	Detected	-0.18309	Detected	0	-0.199233	Detected	-0.168697	Detected	-0.183965	0.422149	650	435	453	424	A_33_P3301445	Unknown
A_33_P3301509	-0.15373	Compromised	0.153729	Compromised	-4.8e-07	0.294359	Compromised	0.536918	Compromised	0.415638	0.167788	1.63	1.74	2.02	2.19	A_33_P3301509	Unknown
A_33_P3301876	0.0749209	Detected	-0.0749209	Detected	0	-0.416309	Detected	0.0685189	Detected	-0.173895	0.56389	80	62.2	51.7	66.3	A_33_P3301876	Unknown
A_33_P3301980	-0.149829	Compromised	0.149829	Compromised	0	0.256257	Compromised	0.46141	Compromised	0.358833	0.186783	1.62	1.72	1.95	2.06	A_33_P3301980	Unknown
A_33_P3302390	0.154567	Detected	-0.154567	Detected	0	0.0817931	Detected	-0.106629	Detected	-0.012418	0.951548	60.9	42.4	52.6	42.3	A_33_P3302390	Unknown
A_33_P3303302	-0.0906506	Detected	0.0906506	Detected	0	-0.200411	Detected	-0.526062	Detected	-0.363237	0.190606	41.1	40.2	34.6	25.3	A_33_P3303302	Unknown
A_33_P3303361	-0.649642	Compromised	0.649642	Compromised	0	1.58635	Compromised	-0.0171199	Compromised	0.784614	0.52645	1.79	3.8	7.66	2.31	A_33_P3303361	Unknown
A_33_P3303394	0.020864	Detected	-0.0208645	Detected	-4.77e-07	0.256309	Detected	0.115968	Detected	0.186138	0.126081	8210	6880	8780	7300	A_33_P3303394	Unknown
A_33_P3303469	-0.182896	Detected	0.182896	Detected	0	-0.0524955	Detected	-0.407011	Detected	-0.229753	0.462231	52.9	58.8	52.6	37.7	A_33_P3303469	Unknown
A_33_P3303557	1.31163	Detected	-1.31163	Compromised	5e-07	0.084363	Compromised	-0.438698	Compromised	-0.177168	0.90674	17.5	2.45	6.79	4.33	A_33_P3303557	Unknown
A_33_P3303562	0.0184641	Detected	-0.0184641	Detected	0	0.15707	Detected	-0.497634	Detected	-0.170282	0.655271	20.1	16.9	20.1	11.7	A_33_P3303562	Unknown
A_33_P3303752	0.10758	Compromised	-0.107581	Compromised	-4.75e-07	0.609706	Compromised	1.04023	Compromised	0.824966	0.0755719	5.06	3.76	6.51	8.04	A_33_P3303752	Unknown
A_33_P3304092	0.701627	Compromised	-0.701627	Compromised	0	-0.596631	Compromised	-0.000380993	Compromised	-0.298506	0.73316	5.55	1.81	2.05	2.84	A_33_P3304092	Unknown
A_33_P3304097	0.364354	Detected	-0.364354	Detected	0	-0.321953	Detected	-1.5273	Detected	-0.924625	0.319626	68.2	35.5	38.5	15.3	A_33_P3304097	Unknown
A_33_P3304182	-0.143412	Compromised	0.143413	Compromised	4.8e-07	0.269368	Compromised	0.456463	Compromised	0.362916	0.168168	1.72	1.81	2.08	2.17	A_33_P3304182	Unknown
A_33_P3304369	0.0453494	Detected	-0.0453494	Detected	0	-0.205457	Detected	-0.221727	Detected	-0.213592	0.0435149	279	226	213	193	A_33_P3304369	Unknown
A_33_P3304402	-0.143412	Compromised	0.143413	Compromised	4.8e-07	1.29344	Compromised	1.56528	Compromised	1.42936	0.0185779	1.72	1.81	4.23	4.68	A_33_P3304402	Unknown
A_33_P3304748	0.0480421	Detected	-0.0480421	Detected	0	-0.0463293	Detected	-0.180409	Detected	-0.113369	0.303018	34.2	27.6	29.1	24.3	A_33_P3304748	Unknown
A_33_P3304769	-0.126605	Compromised	0.126606	Compromised	4.8e-07	0.257366	Compromised	0.376496	Compromised	0.316931	0.151751	1.78	1.83	2.11	2.1	A_33_P3304769	Unknown
A_33_P3304998	0.0774536	Compromised	-0.0774536	Compromised	0	0.0509996	Compromised	0.322413	Compromised	0.186707	0.35461	2.22	1.72	1.98	2.19	A_33_P3304998	Unknown
A_33_P3305250	0.0938177	Detected	-0.0938177	Detected	0	-0.0599318	Detected	0.366918	Detected	0.153493	0.577946	16.9	12.8	13.8	17	A_33_P3305250	Unknown
A_33_P3305335	-0.130146	Compromised	0.130146	Compromised	-4.7e-07	1.4125	Compromised	0.376064	Compromised	0.894279	0.236162	1.81	1.87	4.79	2.14	A_33_P3305335	Unknown
A_33_P3305438	0.231857	Detected	-0.231857	Detected	0	0.284392	Detected	0.152063	Detected	0.218228	0.460951	25.9	16.2	24.4	20.4	A_33_P3305438	Unknown
A_33_P3305462	-0.146707	Compromised	0.146708	Compromised	4.7e-07	0.275397	Compromised	0.421558	Compromised	0.348478	0.16737	1.75	1.85	2.13	2.16	A_33_P3305462	Unknown
A_33_P3305526	-0.141627	Compromised	0.141627	Compromised	4.8e-07	0.810016	Compromised	0.384667	Compromised	0.597342	0.144377	1.81	1.9	3.18	2.17	A_33_P3305526	Unknown
A_33_P3305710	0.120567	Compromised	-0.120567	Compromised	0	-0.140758	Compromised	0.529546	Compromised	0.194394	0.639959	2.85	2.08	2.16	3.15	A_33_P3305710	Unknown
A_33_P3305820	-0.849031	Compromised	0.849031	Compromised	0	-0.431824	Compromised	-0.197419	Compromised	-0.314621	0.748758	1.69	4.73	2.05	2.21	A_33_P3305820	Unknown
A_33_P3306063	-0.154584	Compromised	0.154584	Compromised	-4.8e-07	0.284145	Compromised	0.502322	Compromised	0.393233	0.17324	1.6	1.71	1.97	2.1	A_33_P3306063	Unknown
A_33_P3306327	-0.0136163	Detected	0.0136163	Detected	0	-0.0877402	Detected	0.104131	Detected	0.00819564	0.940299	1240	1090	1070	1120	A_33_P3306327	Unknown
A_33_P3306339	-0.164361	Compromised	0.164361	Compromised	4.8e-07	0.243943	Compromised	0.460124	Compromised	0.352034	0.215421	1.8	1.95	2.17	2.31	A_33_P3306339	Unknown
A_33_P3306363	0.341609	Compromised	-0.341609	Compromised	-4.8e-07	0.923947	Compromised	-0.797435	Compromised	0.0632563	0.951753	6.72	3.61	9.14	2.54	A_33_P3306363	Unknown
A_33_P3306526	-0.0855999	Detected	0.0856009	Detected	9.5e-07	0.236675	Detected	0.00292873	Detected	0.119802	0.495213	38300	37200	43500	33900	A_33_P3306526	Unknown
A_33_P3307063	-0.152637	Compromised	0.152637	Compromised	0	0.238889	Compromised	3.65009	Detected	1.94449	0.37391	1.67	1.78	1.99	19.4	A_33_P3307063	Unknown
A_33_P3307088	0.679436	Compromised	-0.679436	Compromised	-4.7e-07	-0.594418	Compromised	-0.105865	Compromised	-0.350141	0.675629	5.59	1.88	2.1	2.7	A_33_P3307088	Unknown
A_33_P3307192	-0.48438	Compromised	0.48438	Compromised	0	-0.133113	Compromised	0.078177	Compromised	-0.0274682	0.960852	1.7	2.87	1.97	2.09	A_33_P3307192	Unknown
A_33_P3307402	0.432133	Detected	-0.432133	Detected	-2.4e-07	0.127309	Detected	-3.22804	Compromised	-1.55036	0.465273	32.5	15.4	23.9	2.14	A_33_P3307402	Unknown
A_33_P3307408	-0.249904	Compromised	0.249903	Compromised	-4.8e-07	-0.144014	Compromised	-0.0246639	Compromised	-0.0843389	0.773899	2.23	2.72	2.18	2.17	A_33_P3307408	Unknown
A_33_P3308147	-0.150114	Compromised	0.150114	Compromised	0	0.207387	Compromised	2.23746	Compromised	1.22242	0.355725	1.77	1.88	2.06	7.71	A_33_P3308147	Unknown
A_33_P3308153	-0.122407	Detected	0.122407	Detected	0	-0.152929	Detected	-0.411211	Detected	-0.28207	0.253786	226	231	201	154	A_33_P3308153	Unknown
A_33_P3309643	-0.0739763	Detected	0.0739763	Detected	0	0.444123	Detected	0.530305	Detected	0.487214	0.0295161	113	108	147	143	A_33_P3309643	Unknown
A_33_P3309656	-0.250612	Compromised	0.250612	Compromised	0	0.0764384	Compromised	0.315632	Compromised	0.196035	0.553368	1.72	2.1	1.96	2.12	A_33_P3309656	Unknown
A_33_P3309849	0.0116811	Detected	-0.0116811	Detected	0	-0.141646	Detected	0.0818925	Detected	-0.029877	0.815244	119	101	97.2	104	A_33_P3309849	Unknown
A_33_P3310198	-0.154876	Compromised	0.154876	Compromised	4.7e-07	0.300203	Compromised	0.571617	Compromised	0.43591	0.168485	1.59	1.7	1.98	2.19	A_33_P3310198	Unknown
A_33_P3310296	0.0201914	Detected	-0.0201914	Detected	0	0.0647881	Detected	-0.301869	Detected	-0.11854	0.586256	42.8	35.9	40.1	28.5	A_33_P3310296	Unknown
A_33_P3310327	-0.151849	Compromised	0.151849	Compromised	0	0.235577	Compromised	0.4649	Compromised	0.350238	0.207025	1.7	1.81	2.02	2.17	A_33_P3310327	Unknown
A_33_P3310401	-0.153451	Compromised	0.153451	Compromised	0	0.242312	Compromised	0.467831	Compromised	0.355071	0.203242	1.64	1.75	1.96	2.1	A_33_P3310401	Unknown
A_33_P3310409	0.633659	Compromised	-0.633659	Compromised	0	-0.564628	Compromised	-0.345963	Compromised	-0.455295	0.552307	5.33	1.91	2.11	2.25	A_33_P3310409	Unknown
A_33_P3310512	-0.00771117	Detected	0.00771117	Detected	0	-0.128127	Detected	0.157055	Detected	0.0144639	0.928561	35.9	31.3	30	33.5	A_33_P3310512	Unknown
A_33_P3310751	-0.267586	Detected	0.267586	Detected	0	0.202863	Detected	-0.606737	Detected	-0.201937	0.717705	34.8	43.5	43.8	22.9	A_33_P3310751	Unknown
A_33_P3310754	0.166539	Compromised	-0.166539	Compromised	-4.7e-07	-0.0416307	Compromised	0.633531	Compromised	0.29595	0.514103	5.71	3.91	4.49	6.57	A_33_P3310754	Unknown
A_33_P3311001	-0.796782	Compromised	0.796782	Compromised	4.6e-07	0.201966	Compromised	-0.28757	Compromised	-0.0428021	0.963714	1.84	4.79	3.34	2.18	A_33_P3311001	Unknown
A_33_P3311308	0.274589	Compromised	-0.274589	Compromised	0	-0.151869	Compromised	-0.0391216	Compromised	-0.0954952	0.765809	3.24	1.91	2.19	2.17	A_33_P3311308	Unknown
A_33_P3311458	0.00471663	Detected	-0.00471663	Detected	0	-0.16968	Detected	0.0604908	Detected	-0.0545948	0.682215	846	725	681	732	A_33_P3311458	Unknown
A_33_P3311646	-0.116176	Detected	0.116177	Detected	4.75e-07	-0.0498857	Detected	0.334631	Detected	0.142373	0.59103	2250	2280	2140	2560	A_33_P3311646	Unknown
A_33_P3311648	-0.157562	Compromised	0.157562	Compromised	0	0.274543	Compromised	0.524262	Compromised	0.399403	0.185323	1.64	1.76	2.01	2.19	A_33_P3311648	Unknown
A_33_P3311711	-0.168379	Compromised	0.168379	Compromised	0	0.254595	Compromised	0.482759	Compromised	0.368677	0.211565	1.79	1.95	2.18	2.34	A_33_P3311711	Unknown
A_33_P3311855	-0.139231	Compromised	0.139231	Compromised	0	0.258234	Compromised	3.05705	Detected	1.65764	0.359752	1.73	1.81	2.07	13.2	A_33_P3311855	Unknown
A_33_P3311911	0.0855312	Compromised	-0.0855312	Compromised	0	-0.885995	Compromised	0.850162	Compromised	-0.0179167	0.985478	4.49	3.44	2.08	6.35	A_33_P3311911	Unknown
A_33_P3311920	-0.142597	Compromised	0.142597	Compromised	4.8e-07	0.271287	Compromised	0.712409	Compromised	0.491848	0.201988	1.76	1.85	2.13	2.65	A_33_P3311920	Unknown
A_33_P3311966	0.794036	Compromised	-0.794036	Compromised	0	-0.65717	Compromised	0.889305	Compromised	0.116067	0.926152	5.96	1.71	1.98	5.3	A_33_P3311966	Unknown
A_33_P3312044	-0.443102	Compromised	0.443101	Compromised	-4.8e-07	1.28726	Compromised	1.29569	Compromised	1.29147	0.100323	2.12	3.38	6.39	5.89	A_33_P3312044	Unknown
A_33_P3312147	-1.16673	Compromised	1.16672	Compromised	-3e-07	0.611508	Compromised	-0.0453691	Compromised	0.283069	0.837068	1.64	7.13	5.11	2.97	A_33_P3312147	Unknown
A_33_P3312187	-0.512366	Compromised	0.512365	Compromised	-4.6e-07	-0.585569	Compromised	-0.3876	Compromised	-0.486585	0.449544	2.49	4.37	2.15	2.26	A_33_P3312187	Unknown
A_33_P3312251	-0.0957742	Compromised	0.0957747	Compromised	4.76e-07	0.0138316	Compromised	1.92715	Compromised	0.970493	0.419044	2.01	1.98	1.97	6.8	A_33_P3312251	Unknown
A_33_P3312342	-0.143622	Compromised	0.143622	Compromised	4.8e-07	2.69348	Detected	1.66312	Compromised	2.1783	0.0553268	1.71	1.8	11.1	4.98	A_33_P3312342	Unknown
A_33_P3312436	-0.146098	Compromised	0.146098	Compromised	0	0.292632	Compromised	0.49005	Compromised	0.391341	0.156647	1.6	1.69	1.97	2.07	A_33_P3312436	Unknown
A_33_P3312774	-0.156105	Compromised	0.156105	Compromised	0	0.246957	Compromised	0.482391	Compromised	0.364674	0.203152	1.69	1.81	2.03	2.19	A_33_P3312774	Unknown
A_33_P3312784	0.090888	Detected	-0.0908878	Detected	2.35e-07	-0.077395	Detected	0.2197	Detected	0.0711526	0.722443	16.7	12.7	13.5	15.2	A_33_P3312784	Unknown
A_33_P3312886	-0.886027	Compromised	0.886027	Compromised	4.8e-07	-0.0543098	Compromised	-0.270432	Compromised	-0.162371	0.872421	1.67	4.92	2.7	2.13	A_33_P3312886	Unknown
A_33_P3313075	-0.128157	Compromised	0.128156	Compromised	-4.7e-07	1.14795	Compromised	0.544897	Compromised	0.846425	0.122827	1.65	1.7	3.63	2.19	A_33_P3313075	Unknown
A_33_P3313095	0.240474	Compromised	-0.240474	Compromised	0	0.0546446	Compromised	0.769766	Compromised	0.412205	0.439717	2.88	1.78	2.3	3.46	A_33_P3313095	Unknown
A_33_P3313323	-0.160365	Compromised	0.160364	Compromised	-4.8e-07	0.982221	Compromised	0.405278	Compromised	0.69375	0.170309	1.81	1.95	3.63	2.23	A_33_P3313323	Unknown
A_33_P3313552	-0.253145	Compromised	0.253145	Compromised	0	-0.342902	Compromised	-0.216918	Compromised	-0.27991	0.395558	4.44	5.44	3.79	3.79	A_33_P3313552	Unknown
A_33_P3313625	-0.313302	Compromised	0.313302	Compromised	0	-0.378568	Compromised	-0.660769	Compromised	-0.519669	0.269585	6.45	8.59	5.6	4.22	A_33_P3313625	Unknown
A_33_P3313640	-0.306891	Compromised	0.306891	Compromised	0	0.251793	Compromised	-1.21367	Compromised	-0.480939	0.606456	5	6.6	6.69	2.22	A_33_P3313640	Unknown
A_33_P3313652	-0.00366974	Detected	0.00366974	Detected	0	0.0940909	Detected	-0.722593	Detected	-0.314251	0.52203	60.9	52.8	59.2	30.8	A_33_P3313652	Unknown
A_33_P3313695	-0.45983	Compromised	0.45983	Compromised	-4.8e-07	-0.983808	Compromised	-0.719663	Compromised	-0.851736	0.216984	3.15	5.14	1.99	2.19	A_33_P3313695	Unknown
A_33_P3314121	-0.143412	Compromised	0.143413	Compromised	4.8e-07	0.296849	Compromised	0.443105	Compromised	0.369977	0.148325	1.72	1.81	2.12	2.15	A_33_P3314121	Unknown
A_33_P3314352	-0.256402	Compromised	0.256402	Compromised	0	0.12518	Compromised	1.55275	Compromised	0.838966	0.3839	1.69	2.08	2	4.93	A_33_P3314352	Unknown
A_33_P3314574	-1.13645	Compromised	1.13645	Detected	2e-07	0.259833	Compromised	0.889894	Compromised	0.574863	0.67413	2.25	9.38	5.38	7.63	A_33_P3314574	Unknown
A_33_P3314828	-0.146932	Compromised	0.146931	Compromised	-4.8e-07	0.206942	Compromised	0.409424	Compromised	0.308183	0.226281	1.74	1.84	2.02	2.13	A_33_P3314828	Unknown
A_33_P3315074	0.454175	Detected	-0.454175	Detected	0	-0.327251	Detected	-0.89184	Detected	-0.609545	0.372461	193	88.7	102	63.2	A_33_P3315074	Unknown
A_33_P3315154	-0.154011	Compromised	0.154011	Compromised	4.8e-07	0.980135	Compromised	0.525616	Compromised	0.752875	0.111217	1.62	1.73	3.23	2.16	A_33_P3315154	Unknown
A_33_P3315624	-0.330562	Compromised	0.330562	Compromised	0	-0.39549	Compromised	-0.137312	Compromised	-0.266401	0.531141	2.28	3.11	1.98	2.17	A_33_P3315624	Unknown
A_33_P3315634	-0.168196	Detected	0.168196	Detected	0	0.0891795	Detected	-0.129973	Detected	-0.0203967	0.928338	30.3	33	32.9	25.9	A_33_P3315634	Unknown
A_33_P3315659	0.104605	Compromised	-0.104606	Compromised	-4.75e-07	-0.0376897	Compromised	0.141242	Compromised	0.0517762	0.742955	2.6	1.94	2.14	2.22	A_33_P3315659	Unknown
A_33_P3315704	-0.00570488	Detected	0.00570464	Compromised	-2.385e-07	0.00591183	Compromised	-0.251878	Compromised	-0.122983	0.441089	10.8	9.39	9.89	7.58	A_33_P3315704	Unknown
A_33_P3315724	-0.149829	Compromised	0.149829	Compromised	0	1.00207	Compromised	0.529797	Compromised	0.765935	0.111464	1.62	1.72	3.27	2.16	A_33_P3315724	Unknown
A_33_P3315763	0.0218201	Detected	-0.0218191	Detected	9.53e-07	0.1091	Detected	0.00590229	Detected	0.0575013	0.412628	51500	43100	49700	42400	A_33_P3315763	Unknown
A_33_P3315824	-0.386439	Detected	0.386439	Detected	0	-0.349854	Detected	-0.79645	Detected	-0.573152	0.327746	24.9	36.7	23.2	15.6	A_33_P3315824	Unknown
A_33_P3315836	0.953199	Detected	-0.953199	Compromised	0	0.25673	Detected	-0.0867727	Detected	0.0849785	0.938079	28.9	6.65	16.2	11.7	A_33_P3315836	Unknown
A_33_P3315899	-0.431749	Detected	0.431749	Detected	0	0.0683134	Detected	-0.693229	Detected	-0.312458	0.641685	1440	2260	1850	1000	A_33_P3315899	Unknown
A_33_P3315915	-0.403964	Compromised	0.403964	Detected	0	0.46031	Detected	-0.185106	Compromised	0.137602	0.815059	6.41	9.68	10.6	6.21	A_33_P3315915	Unknown
A_33_P3315986	-0.498758	Detected	0.498757	Detected	-2.4e-07	0.299193	Detected	0.319932	Detected	0.309563	0.598195	12.6	21.7	19.9	18.5	A_33_P3315986	Unknown
A_33_P3316093	-0.129049	Compromised	0.129049	Compromised	0	0.278905	Compromised	0.340471	Compromised	0.309688	0.144721	1.9	1.96	2.29	2.19	A_33_P3316093	Unknown
A_33_P3316178	-0.154584	Compromised	0.154584	Compromised	-4.8e-07	0.298718	Compromised	0.556261	Compromised	0.427489	0.167533	1.6	1.71	1.99	2.18	A_33_P3316178	Unknown
A_33_P3316248	-0.040303	Detected	0.0403032	Detected	2.38e-07	-0.604942	Compromised	-0.2437	Compromised	-0.424321	0.148877	14.8	13.5	9.09	10.7	A_33_P3316248	Unknown
A_33_P3316261	-0.14809	Compromised	0.14809	Compromised	-4.7e-07	0.276136	Compromised	0.47717	Compromised	0.376653	0.170005	1.69	1.79	2.06	2.17	A_33_P3316261	Unknown
A_33_P3316379	-0.0623307	Detected	0.0623312	Detected	4.77e-07	0.14956	Detected	0.184247	Detected	0.166903	0.123122	4030	3790	4240	3980	A_33_P3316379	Unknown
A_33_P3316572	-0.15373	Compromised	0.153729	Compromised	-4.8e-07	0.294359	Compromised	0.530315	Compromised	0.412337	0.167166	1.63	1.74	2.02	2.18	A_33_P3316572	Unknown
A_33_P3316671	0.4254	Detected	-0.4254	Detected	0	-0.138571	Detected	-0.0919638	Detected	-0.115267	0.812096	152	72.7	93.4	88.4	A_33_P3316671	Unknown
A_33_P3316691	-0.13065	Detected	0.13065	Detected	0	0.143343	Detected	-0.0258412	Detected	0.0587506	0.742119	62	64.1	68.1	55.5	A_33_P3316691	Unknown
A_33_P3316696	-0.18356	Detected	0.18356	Detected	0	0.0340345	Detected	-0.92523	Detected	-0.445598	0.477047	23.1	25.7	24.4	11.5	A_33_P3316696	Unknown
A_33_P3317460	-0.0239232	Detected	0.0239232	Detected	0	0.0808013	Detected	0.0626953	Detected	0.0717483	0.10707	51.7	46.1	50.5	45.7	A_33_P3317460	Unknown
A_33_P3317548	-0.734251	Compromised	0.73425	Compromised	-4.8e-07	-0.353444	Compromised	1.15609	Compromised	0.401321	0.739788	1.86	4.44	2.2	5.74	A_33_P3317548	Unknown
A_33_P3317761	0.0285294	Detected	-0.0285294	Detected	0	-0.0516374	Detected	-1.206	Compromised	-0.62882	0.390191	19.9	16.5	17.1	7.04	A_33_P3317761	Unknown
A_33_P3318069	-0.12326	Compromised	0.12326	Compromised	0	-0.485553	Compromised	-0.35957	Compromised	-0.422561	0.0926393	3	3.07	2.12	2.12	A_33_P3318069	Unknown
A_33_P3318227	-0.143622	Compromised	0.143622	Compromised	4.8e-07	0.242467	Compromised	0.477901	Compromised	0.360184	0.191978	1.71	1.8	2.03	2.19	A_33_P3318227	Unknown
A_33_P3318377	0.00357318	Detected	-0.00357318	Detected	0	0.223973	Detected	0.168626	Detected	0.196299	0.0196134	120	103	127	112	A_33_P3318377	Unknown
A_33_P3318384	-0.223222	Detected	0.223222	Detected	0	-0.583605	Detected	-0.782534	Compromised	-0.683069	0.107709	17.1	20.1	12.1	9.66	A_33_P3318384	Unknown
A_33_P3318736	0.770228	Compromised	-0.770228	Compromised	0	-0.700095	Compromised	-0.489637	Compromised	-0.594866	0.524109	6.07	1.8	1.99	2.11	A_33_P3318736	Unknown
A_33_P3318766	0.465173	Detected	-0.465173	Detected	0	-0.0981801	Detected	0.100074	Detected	0.00094676	0.998592	47.5	21.5	29.2	30.7	A_33_P3318766	Unknown
A_33_P3318781	-0.150353	Compromised	0.150353	Compromised	0	0.281034	Compromised	0.499666	Compromised	0.39035	0.170566	1.6	1.7	1.96	2.09	A_33_P3318781	Unknown
A_33_P3319502	-0.127233	Detected	0.127233	Detected	0	-0.202335	Detected	-0.582291	Detected	-0.392313	0.228336	138	142	119	83.8	A_33_P3319502	Unknown
A_33_P3319937	-0.119543	Detected	0.119542	Detected	-4.8e-07	-0.131974	Detected	-0.0853348	Detected	-0.108655	0.466471	33200	33800	29900	28300	A_33_P3319937	Unknown
A_33_P3319953	-0.31953	Compromised	0.319531	Compromised	4.6e-07	0.553152	Compromised	-0.476405	Compromised	0.0383735	0.955261	3	4.03	4.99	2.24	A_33_P3319953	Unknown
A_33_P3320241	-0.150353	Compromised	0.150353	Compromised	0	0.273654	Compromised	0.485794	Compromised	0.379724	0.175106	1.6	1.7	1.95	2.07	A_33_P3320241	Unknown
A_33_P3320283	0.495478	Compromised	-0.495478	Compromised	0	-0.0337725	Compromised	-0.134065	Compromised	-0.0839188	0.881683	3.94	1.71	2.48	2.12	A_33_P3320283	Unknown
A_33_P3320408	-0.153177	Compromised	0.153177	Compromised	0	0.241158	Compromised	0.47301	Compromised	0.357084	0.204143	1.65	1.76	1.97	2.12	A_33_P3320408	Unknown
A_33_P3320415	-0.0333786	Compromised	0.0333791	Compromised	4.78e-07	-0.216702	Compromised	-0.187148	Compromised	-0.201925	0.0311609	2.9	2.62	2.32	2.17	A_33_P3320415	Unknown
A_33_P3320418	-0.121651	Compromised	0.121651	Compromised	0	0.286304	Compromised	0.341267	Compromised	0.313785	0.128272	1.9	1.94	2.29	2.18	A_33_P3320418	Unknown
A_33_P3320698	0.699867	Compromised	-0.699866	Compromised	5e-07	0.810458	Compromised	0.770369	Compromised	0.790413	0.376133	5.72	1.87	5.61	5	A_33_P3320698	Unknown
A_33_P3320708	-0.147387	Compromised	0.147387	Compromised	-4.8e-07	0.279199	Compromised	0.432404	Compromised	0.355802	0.165475	1.72	1.82	2.1	2.14	A_33_P3320708	Unknown
A_33_P3321120	-0.635397	Compromised	0.635397	Compromised	0	0.94113	Compromised	0.718626	Compromised	0.829878	0.327082	1.72	3.58	4.66	3.66	A_33_P3321120	Unknown
A_33_P3321382	0.580033	Compromised	-0.580033	Compromised	0	0.386908	Compromised	1.07583	Compromised	0.731367	0.3916	4.43	1.71	3.52	5.2	A_33_P3321382	Unknown
A_33_P3321564	-0.144266	Compromised	0.144266	Compromised	0	0.484665	Compromised	0.449104	Compromised	0.466885	0.0847844	1.68	1.77	2.36	2.11	A_33_P3321564	Unknown
A_33_P3321682	-0.102183	Detected	0.102182	Detected	-4.75e-07	0.195489	Detected	0.144595	Detected	0.170042	0.247719	16300	16200	18200	16100	A_33_P3321682	Unknown
A_33_P3321689	-0.179309	Detected	0.179309	Detected	0	0.357703	Detected	0.0644615	Detected	0.211082	0.458325	34.9	38.6	46	34.4	A_33_P3321689	Unknown
A_33_P3321934	-0.687167	Compromised	0.687167	Compromised	0	-0.301468	Compromised	-0.110194	Compromised	-0.205831	0.794687	1.82	4.07	2.16	2.26	A_33_P3321934	Unknown
A_33_P3322103	0.126524	Compromised	-0.126525	Compromised	-4.8e-07	0.361893	Compromised	-0.624073	Compromised	-0.13109	0.820822	7.64	5.53	8.17	3.78	A_33_P3322103	Unknown
A_33_P3322211	-0.185242	Compromised	0.185242	Compromised	4.8e-07	0.259467	Compromised	0.907782	Compromised	0.583624	0.258439	1.65	1.84	2.04	2.93	A_33_P3322211	Unknown
A_33_P3322430	0.22286	Detected	-0.22286	Detected	0	0.152701	Detected	-0.469129	Detected	-0.158214	0.719305	720	456	623	371	A_33_P3322430	Unknown
A_33_P3322460	0.0793624	Detected	-0.0793624	Detected	0	0.223917	Detected	-0.609128	Detected	-0.192605	0.694191	24.2	18.7	24.3	12.5	A_33_P3322460	Unknown
A_33_P3322504	-0.466172	Detected	0.466172	Detected	0	-0.327566	Detected	-0.995132	Detected	-0.661349	0.367943	26	42.8	26	15	A_33_P3322504	Unknown
A_33_P3322730	0.624072	Detected	-0.624072	Detected	0	0.497295	Detected	-3.15984	Compromised	-1.33127	0.562009	73.8	26.8	61.4	4.46	A_33_P3322730	Unknown
A_33_P3322884	-0.139048	Compromised	0.139048	Compromised	0	0.257054	Compromised	0.430791	Compromised	0.343923	0.170834	1.74	1.82	2.08	2.15	A_33_P3322884	Unknown
A_33_P3323544	-0.14941	Compromised	0.14941	Compromised	4.8e-07	0.211588	Compromised	0.39151	Compromised	0.301549	0.225943	1.8	1.91	2.1	2.18	A_33_P3323544	Unknown
A_33_P3323641	-0.125656	Compromised	0.125656	Compromised	-4.8e-07	0.253957	Compromised	0.340231	Compromised	0.297094	0.154826	1.87	1.92	2.21	2.15	A_33_P3323641	Unknown
A_33_P3323687	-0.162635	Compromised	0.162635	Compromised	0	0.281678	Compromised	0.545824	Compromised	0.413751	0.186967	1.61	1.74	1.99	2.19	A_33_P3323687	Unknown
A_33_P3323892	-0.13851	Compromised	0.13851	Compromised	-4.8e-07	0.987817	Compromised	0.413361	Compromised	0.700589	0.159142	1.77	1.85	3.51	2.16	A_33_P3323892	Unknown
A_33_P3323914	0.565136	Detected	-0.565136	Compromised	2e-07	-1.56215	Compromised	-0.0418906	Compromised	-0.802022	0.486305	10.1	3.98	2.1	5.52	A_33_P3323914	Unknown
A_33_P3323975	-0.161327	Compromised	0.161328	Compromised	4.8e-07	0.269167	Compromised	0.511726	Compromised	0.390447	0.192711	1.65	1.78	2.02	2.19	A_33_P3323975	Unknown
A_33_P3323989	1.07588	Detected	-1.07588	Compromised	-5e-07	-1.24738	Compromised	-1.0561	Compromised	-1.15174	0.397961	11.9	2.31	2.16	2.26	A_33_P3323989	Unknown
A_33_P3324149	-0.260376	Detected	0.260376	Detected	0	-0.599249	Detected	-1.65769	Compromised	-1.12847	0.195832	18.1	22.4	13	5.72	A_33_P3324149	Unknown
A_33_P3324284	-0.134756	Compromised	0.134756	Compromised	0	0.258663	Compromised	0.418594	Compromised	0.338629	0.163246	1.76	1.83	2.1	2.15	A_33_P3324284	Unknown
A_33_P3324552	-0.120106	Detected	0.120106	Detected	0	-0.45037	Detected	-0.939581	Detected	-0.694976	0.125457	90.1	91.8	65.1	42.5	A_33_P3324552	Unknown
A_33_P3324675	0.0997686	Detected	-0.0997686	Detected	0	-0.00448179	Detected	-0.602168	Compromised	-0.303325	0.437252	21.3	16	18	10.9	A_33_P3324675	Unknown
A_33_P3324680	-0.154296	Compromised	0.154296	Compromised	0	0.297249	Compromised	0.540927	Compromised	0.419088	0.166707	1.61	1.72	2	2.17	A_33_P3324680	Unknown
A_33_P3324781	-0.321044	Detected	0.321044	Detected	0	-0.141411	Detected	0.243106	Detected	0.0508475	0.904359	10.4	14	10.7	12.8	A_33_P3324781	Unknown
A_33_P3324899	-0.856955	Compromised	0.856956	Detected	2.7e-07	0.944068	Detected	0.920476	Detected	0.932272	0.390314	4.17	11.8	13.2	11.9	A_33_P3324899	Unknown
A_33_P3324904	0.273984	Detected	-0.273985	Detected	-2.4e-07	-1.93481	Compromised	-1.0242	Compromised	-1.4795	0.108421	20	11.8	3.93	6.77	A_33_P3324904	Unknown
A_33_P3324974	0.44819	Compromised	-0.44819	Compromised	0	-0.268256	Compromised	-0.0465136	Compromised	-0.157385	0.765672	3.69	1.71	2.04	2.18	A_33_P3324974	Unknown
A_33_P3325250	-0.122219	Compromised	0.122219	Compromised	0	0.248879	Compromised	1.58667	Compromised	0.917776	0.309578	1.83	1.87	2.15	4.98	A_33_P3325250	Unknown
A_33_P3325330	-0.0177288	Compromised	0.0177283	Compromised	-4.77e-07	0.134749	Compromised	0.281293	Compromised	0.208021	0.11007	2.07	1.83	2.09	2.12	A_33_P3325330	Unknown
A_33_P3325826	-0.159107	Compromised	0.159107	Compromised	0	0.281326	Compromised	0.534066	Compromised	0.407696	0.182619	1.59	1.71	1.96	2.14	A_33_P3325826	Unknown
A_33_P3325948	-0.156678	Compromised	0.156678	Compromised	0	0.249275	Compromised	0.492391	Compromised	0.370833	0.2024	1.67	1.79	2.01	2.18	A_33_P3325948	Unknown
A_33_P3326151	-0.0884512	Detected	0.0884512	Detected	0	0.293921	Detected	-0.152986	Detected	0.0704675	0.79698	20.1	19.6	23.8	16	A_33_P3326151	Unknown
A_33_P3326312	0.0477545	Detected	-0.0477545	Detected	0	0.0328853	Detected	-0.31629	Detected	-0.141702	0.515678	218	176	196	141	A_33_P3326312	Unknown
A_33_P3326439	-0.15879	Compromised	0.158791	Compromised	4.8e-07	0.287244	Compromised	0.552055	Compromised	0.419649	0.179516	1.6	1.72	1.98	2.18	A_33_P3326439	Unknown
A_33_P3326802	-0.11848	Compromised	0.11848	Compromised	0	0.2482	Compromised	0.407814	Compromised	0.328007	0.148542	1.81	1.84	2.12	2.17	A_33_P3326802	Unknown
A_33_P3326817	-0.0165813	Detected	0.0165813	Detected	0	-0.263867	Detected	-0.247761	Detected	-0.255814	0.0051522	1960	1730	1500	1390	A_33_P3326817	Unknown
A_33_P3326827	-0.281197	Compromised	0.281197	Compromised	4.7e-07	1.3899	Compromised	1.77843	Compromised	1.58417	0.0435288	1.68	2.14	4.86	5.83	A_33_P3326827	Unknown
A_33_P3326872	0.99468	Detected	-0.99468	Compromised	-2e-07	0.075603	Compromised	-0.768461	Compromised	-0.346429	0.778901	8.93	1.94	4.29	2.19	A_33_P3326872	Unknown
A_33_P3326898	-0.307922	Detected	0.307922	Detected	0	0.251899	Detected	-0.20708	Detected	0.0224099	0.958773	23.3	30.8	31.2	20.8	A_33_P3326898	Unknown
A_33_P3326942	-0.152371	Compromised	0.152371	Compromised	-4.7e-07	0.223273	Compromised	0.440999	Compromised	0.332136	0.218125	1.68	1.79	1.98	2.11	A_33_P3326942	Unknown
A_33_P3327140	-0.0143745	Detected	0.0143745	Detected	0	-0.077944	Detected	0.169117	Detected	0.0455863	0.749097	933	821	811	882	A_33_P3327140	Unknown
A_33_P3327250	0.162303	Detected	-0.162303	Detected	0	-0.152549	Detected	-0.414536	Detected	-0.283542	0.306987	48.2	33.2	35.2	26.9	A_33_P3327250	Unknown
A_33_P3327491	-0.0373342	Detected	0.0373342	Detected	0	0.0540845	Detected	-0.55444	Detected	-0.250178	0.500172	40.4	36.7	39.1	23.5	A_33_P3327491	Unknown
A_33_P3327723	-0.597491	Compromised	0.597491	Compromised	0	1.0831	Compromised	0.957841	Compromised	1.02047	0.231489	1.59	3.14	4.63	3.89	A_33_P3327723	Unknown
A_33_P3327762	-0.0834751	Detected	0.0834751	Detected	0	0.451059	Detected	0.386045	Detected	0.418552	0.0428824	19	18.4	25	21.9	A_33_P3327762	Unknown
A_33_P3327971	-0.314141	Detected	0.314141	Detected	0	0.20807	Detected	0.0849335	Detected	0.146502	0.692113	17.4	23.2	22.7	19.1	A_33_P3327971	Unknown
A_33_P3328274	-0.144708	Compromised	0.144708	Compromised	-4.8e-07	0.26991	Compromised	0.486309	Compromised	0.378109	0.171461	1.66	1.75	2.01	2.14	A_33_P3328274	Unknown
A_33_P3328284	-0.037523	Detected	0.037523	Detected	0	-0.312106	Detected	-0.329736	Detected	-0.320921	0.0141206	104	94.5	78.1	70.7	A_33_P3328284	Unknown
A_33_P3328289	0.194211	Detected	-0.194211	Detected	0	-0.303922	Compromised	-0.0278733	Compromised	-0.165898	0.558288	13.9	9.16	8.94	9.92	A_33_P3328289	Unknown
A_33_P3328543	-0.130275	Compromised	0.130275	Compromised	-4.8e-07	0.244398	Compromised	0.377171	Compromised	0.310784	0.167442	1.8	1.86	2.12	2.13	A_33_P3328543	Unknown
A_33_P3328564	-0.159107	Compromised	0.159107	Compromised	0	0.288668	Compromised	0.547487	Compromised	0.418077	0.178362	1.59	1.71	1.97	2.16	A_33_P3328564	Unknown
A_33_P3328569	-0.121809	Compromised	0.121809	Compromised	-4.76e-07	0.263107	Compromised	1.11957	Compromised	0.69134	0.260669	1.88	1.92	2.23	3.7	A_33_P3328569	Unknown
A_33_P3328619	0.00699472	Detected	-0.00699425	Detected	4.769e-07	0.0864048	Detected	-0.136222	Detected	-0.0249085	0.844014	19900	17000	19100	15000	A_33_P3328619	Unknown
A_33_P3328751	-0.949266	Compromised	0.949267	Compromised	4.7e-07	-0.0109596	Compromised	1.8718	Compromised	0.930422	0.558456	1.62	5.21	2.82	9.53	A_33_P3328751	Unknown
A_33_P3328958	-0.423461	Compromised	0.423461	Compromised	0	0.0212479	Compromised	0.189051	Compromised	0.10515	0.830266	1.65	2.56	2.04	2.1	A_33_P3328958	Unknown
A_33_P3329038	-0.154584	Compromised	0.154584	Compromised	-4.8e-07	0.298718	Compromised	0.556261	Compromised	0.427489	0.167533	1.6	1.71	1.99	2.18	A_33_P3329038	Unknown
A_33_P3329104	0.266355	Detected	-0.266355	Detected	0	0.474923	Detected	0.308552	Detected	0.391737	0.295496	16.1	9.6	16.9	13.8	A_33_P3329104	Unknown
A_33_P3329123	-0.138687	Compromised	0.138687	Compromised	0	0.268407	Compromised	0.826341	Compromised	0.547374	0.220998	1.76	1.84	2.12	2.86	A_33_P3329123	Unknown
A_33_P3329133	-0.144049	Compromised	0.144049	Compromised	4.8e-07	0.259013	Compromised	0.454371	Compromised	0.356692	0.176939	1.69	1.78	2.03	2.13	A_33_P3329133	Unknown
A_33_P3329740	0.235512	Detected	-0.235512	Detected	0	-0.129457	Detected	0.231905	Detected	0.051224	0.878875	1120	697	790	930	A_33_P3329740	Unknown
A_33_P3329991	-0.0223954	Detected	0.0223954	Detected	0	0.00293946	Detected	-0.504619	Detected	-0.25084	0.428627	490	436	453	292	A_33_P3329991	Unknown
A_33_P3330084	0.0311952	Compromised	-0.0311952	Compromised	0	0.0910239	Compromised	0.330217	Compromised	0.210621	0.230481	2.07	1.71	1.96	2.12	A_33_P3330084	Unknown
A_33_P3330236	0.0768859	Detected	-0.0768859	Detected	0	0.386895	Detected	0.291799	Detected	0.339347	0.0642072	32.5	25.2	36.6	31.4	A_33_P3330236	Unknown
A_33_P3330413	0.0815654	Detected	-0.0815659	Detected	-4.8e-07	-0.088459	Detected	-0.355621	Detected	-0.22204	0.291786	4050	3120	3270	2490	A_33_P3330413	Unknown
A_33_P3330761	-0.147158	Compromised	0.147158	Compromised	4.8e-07	0.383369	Compromised	0.397048	Compromised	0.390208	0.11786	1.73	1.83	2.27	2.1	A_33_P3330761	Unknown
A_33_P3330877	-0.175374	Detected	0.175374	Detected	-2.5e-07	-0.176493	Detected	-0.112974	Detected	-0.144733	0.502035	13	14.3	11.8	11.3	A_33_P3330877	Unknown
A_33_P3330972	-0.141817	Compromised	0.141817	Compromised	4.8e-07	1.28301	Compromised	0.39247	Compromised	0.837742	0.21489	1.8	1.89	4.39	2.17	A_33_P3330972	Unknown
A_33_P3331272	-0.154876	Compromised	0.154876	Compromised	4.7e-07	0.300203	Compromised	1.03045	Compromised	0.665327	0.23544	1.59	1.7	1.98	3.01	A_33_P3331272	Unknown
A_33_P3331326	-0.199081	Detected	0.199081	Detected	0	-0.0360229	Detected	-0.305011	Detected	-0.170517	0.551457	1170	1330	1190	905	A_33_P3331326	Unknown
A_33_P3331391	0.383924	Compromised	-0.383924	Compromised	-4.7e-07	0.21857	Compromised	-0.224055	Compromised	-0.00274252	0.995624	3.79	1.92	3.07	2.07	A_33_P3331391	Unknown
A_33_P3331731	0.74508	Compromised	-0.74508	Compromised	0	-0.666173	Compromised	-0.452727	Compromised	-0.55945	0.534768	6.09	1.87	2.08	2.21	A_33_P3331731	Unknown
A_33_P3331776	0.000933409	Detected	-0.000933409	Detected	0	0.0491645	Detected	-0.252575	Detected	-0.101705	0.569714	52.7	45.4	49.5	36.8	A_33_P3331776	Unknown
A_33_P3331791	-0.116711	Detected	0.116711	Detected	0	-0.0193284	Detected	-0.343658	Detected	-0.181493	0.459558	142	144	138	101	A_33_P3331791	Unknown
A_33_P3331911	0.0276222	Compromised	-0.0276222	Compromised	0	0.623183	Compromised	1.691	Compromised	1.15709	0.162868	2.12	1.76	2.91	5.59	A_33_P3331911	Unknown
A_33_P3331996	-0.15879	Compromised	0.158791	Compromised	4.8e-07	0.272597	Compromised	0.678689	Compromised	0.475643	0.206291	1.6	1.72	1.96	2.38	A_33_P3331996	Unknown
A_33_P3332046	0.0177498	Compromised	-0.0177498	Compromised	0	0.10992	Compromised	0.26262	Compromised	0.18627	0.140666	2.21	1.86	2.14	2.18	A_33_P3332046	Unknown
A_33_P3332541	-0.16101	Compromised	0.16101	Compromised	0	0.267892	Compromised	0.503326	Compromised	0.385609	0.192887	1.66	1.79	2.03	2.19	A_33_P3332541	Unknown
A_33_P3332749	0.376889	Detected	-0.376889	Compromised	0	0.21015	Detected	-1.04094	Compromised	-0.415393	0.626853	17.3	8.85	14	5.39	A_33_P3332749	Unknown
A_33_P3332989	-0.32975	Compromised	0.32975	Compromised	0	0.302845	Compromised	-0.257806	Compromised	0.0225191	0.963233	2.4	3.27	3.38	2.1	A_33_P3332989	Unknown
A_33_P3333003	0.158225	Compromised	-0.158225	Compromised	-4.8e-07	0.44754	Compromised	0.277159	Compromised	0.362349	0.18129	7.81	5.41	8.67	7.06	A_33_P3333003	Unknown
A_33_P3333058	0.314607	Detected	-0.314607	Detected	0	-1.38925	Compromised	-0.0444279	Detected	-0.716837	0.436117	20.8	11.6	5.8	13.5	A_33_P3333058	Unknown
A_33_P3333187	-0.0039804	Detected	0.0039804	Detected	0	-0.430729	Detected	-0.565086	Detected	-0.497908	0.0177819	47.5	41.2	32.1	26.8	A_33_P3333187	Unknown
A_33_P3333327	0.40982	Detected	-0.40982	Compromised	0	-0.92325	Compromised	0.332016	Detected	-0.295617	0.731384	14.2	6.94	5.12	11.2	A_33_P3333327	Unknown
A_33_P3333485	0.489458	Compromised	-0.489458	Compromised	0	-0.368546	Compromised	0.349157	Compromised	-0.0096941	0.988706	4.25	1.86	2.13	3.21	A_33_P3333485	Unknown
A_33_P3333523	-0.0698104	Detected	0.0698109	Detected	4.8e-07	-0.278476	Detected	-0.246819	Detected	-0.262648	0.06691	2010	1910	1580	1480	A_33_P3333523	Unknown
A_33_P3333560	-0.0719907	Detected	0.0719907	Detected	0	-0.113206	Detected	-0.792452	Detected	-0.452829	0.322023	38.4	36.6	33.9	19.4	A_33_P3333560	Unknown
A_33_P3333677	0.0593309	Detected	-0.0593309	Detected	0	-0.90315	Detected	-0.950003	Detected	-0.926576	0.00470596	39.9	31.7	18.6	16.5	A_33_P3333677	Unknown
A_33_P3333708	-0.0771043	Detected	0.0771043	Detected	0	-0.00286126	Detected	-0.214007	Detected	-0.108434	0.49409	848	814	811	642	A_33_P3333708	Unknown
A_33_P3333985	-0.0132136	Detected	0.0132136	Detected	0	-0.10873	Detected	-0.104536	Detected	-0.106633	0.0153801	247	217	210	193	A_33_P3333985	Unknown
A_33_P3334000	-0.133131	Compromised	0.133131	Compromised	0	0.25948	Compromised	1.43943	Compromised	0.849455	0.295334	1.87	1.94	2.23	4.63	A_33_P3334000	Unknown
A_33_P3334043	-0.149066	Compromised	0.149066	Compromised	0	0.259841	Compromised	1.67994	Compromised	0.96989	0.313061	1.65	1.75	1.99	4.88	A_33_P3334043	Unknown
A_33_P3334121	0.541926	Detected	-0.541926	Compromised	-2.5e-07	0.238527	Detected	0.404774	Detected	0.321651	0.616823	14.4	5.86	10.6	10.9	A_33_P3334121	Unknown
A_33_P3334342	-0.00808144	Detected	0.00808144	Detected	0	0.310345	Detected	0.511617	Detected	0.410981	0.0553813	79.1	69	89.6	94.4	A_33_P3334342	Unknown
A_33_P3334428	0.44427	Compromised	-0.44427	Compromised	-4.7e-07	0.760206	Compromised	1.29251	Compromised	1.02636	0.186003	3.67	1.71	4.15	5.5	A_33_P3334428	Unknown
A_33_P3334718	0.168886	Compromised	-0.168885	Compromised	4.8e-07	0.674508	Compromised	0.230982	Compromised	0.452745	0.245824	2.52	1.72	3.25	2.19	A_33_P3334718	Unknown
A_33_P3335401	-0.074398	Compromised	0.0743976	Compromised	-4.76e-07	2.23258	Compromised	1.47811	Compromised	1.85534	0.040366	2.06	1.97	9.26	5.03	A_33_P3335401	Unknown
A_33_P3335540	-0.15639	Compromised	0.15639	Compromised	0	0.24811	Compromised	0.484066	Compromised	0.366088	0.202598	1.68	1.8	2.02	2.18	A_33_P3335540	Unknown
A_33_P3335576	0.18273	Detected	-0.18273	Detected	0	0.39272	Detected	-0.298385	Compromised	0.0471673	0.914985	13.8	9.24	14.5	8.23	A_33_P3335576	Unknown
A_33_P3335606	-0.0652125	Detected	0.0652125	Detected	0	-0.00942588	Detected	-0.330464	Detected	-0.169945	0.430085	950	897	897	658	A_33_P3335606	Unknown
A_33_P3335645	-0.143834	Compromised	0.143835	Compromised	4.8e-07	0.257806	Compromised	0.439284	Compromised	0.348545	0.176933	1.7	1.79	2.04	2.12	A_33_P3335645	Unknown
A_33_P3335905	-0.758842	Compromised	0.758842	Compromised	4.7e-07	-0.387945	Compromised	-0.148193	Compromised	-0.268069	0.76045	1.66	4.1	1.95	2.11	A_33_P3335905	Unknown
A_33_P3336018	-0.358099	Compromised	0.358099	Compromised	0	0.0215144	Compromised	0.101062	Compromised	0.0612884	0.88058	1.87	2.65	2.21	2.14	A_33_P3336018	Unknown
A_33_P3336038	-0.0312829	Detected	0.0312824	Detected	-4.75e-07	-0.0301809	Detected	0.0423632	Detected	0.00609112	0.910437	12100	10900	11000	10600	A_33_P3336038	Unknown
A_33_P3336148	0.149976	Compromised	-0.149975	Compromised	4.8e-07	0.0702043	Compromised	-0.370645	Compromised	-0.15022	0.629874	5.98	4.19	5.14	3.47	A_33_P3336148	Unknown
A_33_P3336302	-0.149318	Compromised	0.149318	Compromised	0	0.289947	Compromised	0.525903	Compromised	0.407925	0.165293	1.64	1.74	2.02	2.18	A_33_P3336302	Unknown
A_33_P3336567	-0.987028	Compromised	0.987028	Compromised	0	1.00648	Compromised	0.0145264	Compromised	0.510505	0.689377	1.62	5.49	5.86	2.7	A_33_P3336567	Unknown
A_33_P3337119	-0.14809	Compromised	0.14809	Compromised	-4.7e-07	0.22626	Compromised	0.436718	Compromised	0.331489	0.209603	1.69	1.79	1.99	2.11	A_33_P3337119	Unknown
A_33_P3337742	-0.277719	Detected	0.277719	Detected	0	0.156564	Detected	-0.529706	Detected	-0.186571	0.713661	72.1	91.4	88.5	50.4	A_33_P3337742	Unknown
A_33_P3338071	0.448289	Compromised	-0.448289	Compromised	0	0.0701623	Compromised	-0.0963659	Compromised	-0.0131018	0.979686	3.82	1.77	2.67	2.18	A_33_P3338071	Unknown
A_33_P3338292	0.476517	Compromised	-0.476517	Compromised	0	-0.373962	Compromised	-0.129716	Compromised	-0.251839	0.659611	3.95	1.76	1.99	2.16	A_33_P3338292	Unknown
A_33_P3338379	0.389382	Compromised	-0.389382	Compromised	0	-0.118376	Compromised	1.21469	Compromised	0.548155	0.551271	3.6	1.81	2.3	5.31	A_33_P3338379	Unknown
A_33_P3338403	-0.121889	Compromised	0.121889	Compromised	0	0.327803	Compromised	0.396705	Compromised	0.362254	0.103605	1.87	1.91	2.32	2.23	A_33_P3338403	Unknown
A_33_P3338539	-0.143412	Compromised	0.143413	Compromised	4.8e-07	0.248409	Compromised	0.416011	Compromised	0.33221	0.183498	1.72	1.81	2.05	2.11	A_33_P3338539	Unknown
A_33_P3338788	-0.149318	Compromised	0.149318	Compromised	0	0.379929	Compromised	0.478818	Compromised	0.429373	0.112081	1.64	1.74	2.15	2.11	A_33_P3338788	Unknown
A_33_P3338808	-0.121971	Compromised	0.12197	Compromised	-4.7e-07	0.252263	Compromised	2.50433	Compromised	1.37829	0.347749	1.86	1.9	2.19	9.56	A_33_P3338808	Unknown
A_33_P3338833	-0.14941	Compromised	0.14941	Compromised	4.8e-07	0.211588	Compromised	0.384877	Compromised	0.298233	0.226358	1.8	1.91	2.1	2.17	A_33_P3338833	Unknown
A_33_P3338873	-0.367673	Compromised	0.367673	Compromised	-4.8e-07	0.749809	Compromised	2.0367	Compromised	1.39326	0.200857	1.72	2.47	3.39	7.58	A_33_P3338873	Unknown
A_33_P3338937	-0.00373173	Compromised	0.00373173	Compromised	0	0.397182	Compromised	1.04245	Compromised	0.719818	0.155405	3.31	2.87	3.97	5.69	A_33_P3338937	Unknown
A_33_P3339197	-0.249323	Compromised	0.249323	Compromised	-4.8e-07	0.0931544	Compromised	0.0408001	Compromised	0.0669773	0.814367	2.24	2.73	2.58	2.28	A_33_P3339197	Unknown
A_33_P3339388	-0.145624	Compromised	0.145623	Compromised	-4.8e-07	0.275916	Compromised	0.388663	Compromised	0.33229	0.167151	1.8	1.9	2.19	2.17	A_33_P3339388	Unknown
A_33_P3339446	-0.766678	Compromised	0.766678	Compromised	4.7e-07	-0.318903	Compromised	0.796053	Compromised	0.238575	0.824789	1.59	3.97	1.97	3.91	A_33_P3339446	Unknown
A_33_P3339611	-0.142797	Compromised	0.142797	Compromised	0	0.265696	Compromised	1.96979	Compromised	1.11774	0.325005	1.75	1.84	2.11	6.3	A_33_P3339611	Unknown
A_33_P3339696	0.179903	Compromised	-0.179903	Compromised	0	-1.60271	Compromised	-0.75659	Compromised	-1.17965	0.124205	7.84	5.27	2.07	3.41	A_33_P3339696	Unknown
A_33_P3339701	-0.122053	Compromised	0.122053	Compromised	0	1.39806	Compromised	2.45664	Compromised	1.92735	0.0710643	1.85	1.89	4.82	9.2	A_33_P3339701	Unknown
A_33_P3339741	0.198951	Compromised	-0.198951	Compromised	0	-1.0265	Compromised	-0.89385	Compromised	-0.960173	0.0445415	5.56	3.64	2.16	2.17	A_33_P3339741	Unknown
A_33_P3340065	-0.68789	Compromised	0.68789	Compromised	2.5e-07	-1.16568	Compromised	-1.09806	Compromised	-1.13187	0.24201	3.48	7.79	2.27	2.18	A_33_P3340065	Unknown
A_33_P3340114	-0.15879	Compromised	0.158791	Compromised	4.8e-07	0.287244	Compromised	0.558658	Compromised	0.422951	0.180163	1.6	1.72	1.98	2.19	A_33_P3340114	Unknown
A_33_P3340189	-0.139604	Compromised	0.139604	Compromised	0	0.217774	Compromised	0.435053	Compromised	0.326413	0.206296	1.71	1.79	1.99	2.12	A_33_P3340189	Unknown
A_33_P3340229	-0.53197	Compromised	0.53197	Compromised	0	1.30832	Compromised	-0.0496278	Compromised	0.629347	0.541498	1.78	3.21	5.79	2.07	A_33_P3340229	Unknown
A_33_P3340264	0.471303	Detected	-0.471303	Compromised	-2.5e-07	-0.269547	Compromised	-0.0840912	Compromised	-0.176819	0.748099	9.18	4.12	4.99	5.2	A_33_P3340264	Unknown
A_33_P3340424	-0.118416	Detected	0.118416	Detected	0	0.14902	Detected	-0.161948	Detected	-0.00646424	0.976619	546	555	597	441	A_33_P3340424	Unknown
A_33_P3340454	-0.148572	Compromised	0.148573	Compromised	4.8e-07	0.278754	Compromised	0.493863	Compromised	0.386309	0.169791	1.67	1.77	2.04	2.17	A_33_P3340454	Unknown
A_33_P3340828	-0.792041	Compromised	0.792041	Compromised	0	1.19518	Compromised	0.311921	Compromised	0.753548	0.493402	2.61	6.75	9.4	4.67	A_33_P3340828	Unknown
A_33_P3340956	0.151907	Compromised	-0.151907	Compromised	4.7e-07	1.06183	Compromised	0.197961	Compromised	0.629896	0.302717	2.49	1.74	4.25	2.14	A_33_P3340956	Unknown
A_33_P3341289	-0.399103	Compromised	0.399103	Compromised	0	-0.0334287	Compromised	0.154247	Compromised	0.0604091	0.896373	1.76	2.64	2.06	2.15	A_33_P3341289	Unknown
A_33_P3341568	-0.0730648	Detected	0.0730648	Detected	0	-0.165842	Detected	-0.707192	Detected	-0.436517	0.259773	110	105	93.7	59	A_33_P3341568	Unknown
A_33_P3341731	-0.122247	Detected	0.122247	Detected	0	-0.0482509	Detected	-0.489716	Detected	-0.268983	0.398063	137	140	131	88.4	A_33_P3341731	Unknown
A_33_P3341882	-0.449914	Compromised	0.449914	Compromised	-4.8e-07	0.427363	Compromised	0.195155	Compromised	0.311259	0.571922	1.69	2.72	2.82	2.2	A_33_P3341882	Unknown
A_33_P3342146	-0.106622	Compromised	0.106622	Compromised	-4.8e-07	0.174236	Compromised	0.359925	Compromised	0.267081	0.199469	1.93	1.93	2.13	2.22	A_33_P3342146	Unknown
A_33_P3342195	-0.136761	Compromised	0.136761	Compromised	0	-0.0450764	Compromised	0.853205	Compromised	0.404064	0.480141	3.75	3.91	3.63	6.2	A_33_P3342195	Unknown
A_33_P3342420	-0.157562	Compromised	0.157562	Compromised	0	0.274543	Compromised	0.524262	Compromised	0.399403	0.185323	1.64	1.76	2.01	2.19	A_33_P3342420	Unknown
A_33_P3342953	-0.295156	Compromised	0.295157	Compromised	4.8e-07	0.267824	Compromised	-0.147607	Compromised	0.0601087	0.883045	2.31	3	3.1	2.13	A_33_P3342953	Unknown
A_33_P3343200	-0.146266	Compromised	0.146266	Compromised	-4.8e-07	0.286284	Compromised	0.405604	Compromised	0.345944	0.159932	1.77	1.87	2.17	2.16	A_33_P3343200	Unknown
A_33_P3343305	-0.00696754	Detected	0.00696754	Detected	0	-0.284593	Detected	0.0250502	Detected	-0.129771	0.490513	40.3	35.1	30.2	34.3	A_33_P3343305	Unknown
A_33_P3343340	-1.41841	Compromised	1.41841	Detected	5e-07	-0.728793	Compromised	-0.77919	Compromised	-0.753992	0.648204	1.72	10.6	2.52	2.23	A_33_P3343340	Unknown
A_33_P3343394	0.0952392	Compromised	-0.0952392	Compromised	0	0.0460596	Compromised	0.11261	Compromised	0.079335	0.514018	2.54	1.92	2.23	2.14	A_33_P3343394	Unknown
A_33_P3343605	0.415394	Detected	-0.415394	Compromised	0	0.0110641	Compromised	0.0986299	Compromised	0.054847	0.907548	9.98	4.84	6.85	6.67	A_33_P3343605	Unknown
A_33_P3344044	-0.159107	Compromised	0.159107	Compromised	0	1.09707	Compromised	1.86138	Compromised	1.47922	0.0701702	1.59	1.71	3.45	5.37	A_33_P3344044	Unknown
A_33_P3344297	-0.845949	Compromised	0.845949	Compromised	0	0.75995	Compromised	1.59817	Compromised	1.17906	0.338061	1.83	5.1	5.06	8.29	A_33_P3344297	Unknown
A_33_P3344521	-0.144708	Compromised	0.144708	Compromised	-4.8e-07	1.34337	Compromised	0.739195	Compromised	1.04128	0.0897632	1.66	1.75	4.23	2.55	A_33_P3344521	Unknown
A_33_P3345031	0.132705	Detected	-0.132705	Detected	0	0.0713732	Detected	0.0647185	Detected	0.0680459	0.659232	170	122	148	135	A_33_P3345031	Unknown
A_33_P3345108	-0.0131829	Compromised	0.0131831	Compromised	2.385e-07	0.433804	Detected	-0.0409124	Compromised	0.196446	0.49549	8.56	7.52	10.6	6.99	A_33_P3345108	Unknown
A_33_P3345299	-0.148572	Compromised	0.148573	Compromised	4.8e-07	0.278754	Compromised	0.500496	Compromised	0.389625	0.170334	1.67	1.77	2.04	2.18	A_33_P3345299	Unknown
A_33_P3345304	-0.137322	Compromised	0.137322	Compromised	-4.8e-07	0.259081	Compromised	0.889107	Compromised	0.574094	0.236753	1.84	1.92	2.2	3.12	A_33_P3345304	Unknown
A_33_P3345319	-0.149642	Compromised	0.149642	Compromised	0	1.075	Compromised	0.405918	Compromised	0.740461	0.18075	1.79	1.9	3.8	2.19	A_33_P3345319	Unknown
A_33_P3345409	-0.149877	Compromised	0.149877	Compromised	0	0.213435	Compromised	0.393867	Compromised	0.303651	0.224733	1.78	1.89	2.08	2.16	A_33_P3345409	Unknown
A_33_P3345614	-0.0757339	Detected	0.0757339	Detected	0	0.0190175	Detected	-0.240653	Detected	-0.110818	0.537722	167	160	162	124	A_33_P3345614	Unknown
A_33_P3345638	0.771934	Compromised	-0.771934	Compromised	0	0.0237923	Compromised	0.773933	Compromised	0.398863	0.687798	6.49	1.92	3.51	5.41	A_33_P3345638	Unknown
A_33_P3345808	-0.372774	Compromised	0.372774	Compromised	0	-0.14397	Compromised	0.107544	Compromised	-0.0182133	0.967282	1.86	2.69	1.98	2.16	A_33_P3345808	Unknown
A_33_P3345821	-0.137653	Compromised	0.137652	Compromised	-4.7e-07	2.20224	Compromised	0.380692	Compromised	1.29147	0.29595	1.82	1.9	8.37	2.17	A_33_P3345821	Unknown
A_33_P3346046	0.167749	Detected	-0.167749	Detected	0	0.0866768	Detected	-0.559534	Detected	-0.236429	0.582683	88.5	60.5	76	44.5	A_33_P3346046	Unknown
A_33_P3346062	-0.159107	Compromised	0.159107	Compromised	0	0.295972	Compromised	0.567386	Compromised	0.431679	0.175033	1.59	1.71	1.98	2.19	A_33_P3346062	Unknown
A_33_P3346331	-0.558013	Compromised	0.558013	Compromised	-4.8e-07	-1.44702	Compromised	-0.890402	Compromised	-1.16871	0.201748	4.22	7.89	2.07	2.79	A_33_P3346331	Unknown
A_33_P3346333	-0.26571	Compromised	0.26571	Compromised	0	-1.60133	Compromised	-1.37482	Compromised	-1.48808	0.0356721	5.39	6.72	1.94	2.08	A_33_P3346333	Unknown
A_33_P3346508	0.0470228	Detected	-0.0470228	Detected	0	0.0731964	Detected	-0.642983	Detected	-0.284893	0.512873	90.7	73.3	83.9	46.8	A_33_P3346508	Unknown
A_33_P3346526	0.673159	Compromised	-0.673159	Compromised	0	-0.610981	Compromised	1.24784	Compromised	0.31843	0.807464	5.63	1.91	2.1	6.98	A_33_P3346526	Unknown
A_33_P3346533	-0.0669048	Detected	0.0669048	Detected	0	-0.253452	Detected	-1.23463	Detected	-0.744042	0.271774	1120	1060	894	415	A_33_P3346533	Unknown
A_33_P3346610	0.433154	Detected	-0.433154	Detected	0	-0.303742	Detected	-1.89032	Detected	-1.09703	0.348726	93.2	44.1	50.8	15.5	A_33_P3346610	Unknown
A_33_P3346643	-0.162755	Compromised	0.162755	Compromised	0	0.241662	Compromised	0.455108	Compromised	0.348385	0.215337	1.73	1.87	2.08	2.21	A_33_P3346643	Unknown
A_33_P3346691	-0.149066	Compromised	0.149066	Compromised	0	0.259841	Compromised	0.463446	Compromised	0.361644	0.183037	1.65	1.75	1.99	2.1	A_33_P3346691	Unknown
A_33_P3346716	-0.251863	Compromised	0.251863	Compromised	4.7e-07	-0.555363	Compromised	0.686098	Compromised	0.0653677	0.931164	2.69	3.29	1.98	4.29	A_33_P3346716	Unknown
A_33_P3346881	0.136092	Compromised	-0.136091	Compromised	4.8e-07	0.017539	Compromised	-0.60522	Compromised	-0.29384	0.478352	4.9	3.5	4.1	2.44	A_33_P3346881	Unknown
A_33_P3347020	-0.134446	Compromised	0.134446	Compromised	0	0.256346	Compromised	0.402602	Compromised	0.329474	0.164213	1.78	1.85	2.12	2.15	A_33_P3347020	Unknown
A_33_P3347049	0.0480421	Detected	-0.0480421	Detected	0	0.607999	Detected	-0.222579	Detected	0.19271	0.690096	17.1	13.8	22.9	11.8	A_33_P3347049	Unknown
A_33_P3347457	-0.141069	Compromised	0.141069	Compromised	0	0.208684	Compromised	0.400857	Compromised	0.30477	0.216089	1.84	1.93	2.13	2.23	A_33_P3347457	Unknown
A_33_P3347503	0.77458	Detected	-0.77458	Compromised	0	0.503541	Detected	-1.12914	Compromised	-0.312797	0.807143	26.7	7.87	20.1	5.94	A_33_P3347503	Unknown
A_33_P3347522	-0.134988	Detected	0.134988	Detected	0	0.0897188	Detected	0.0214987	Detected	0.0556087	0.728213	37400	38900	39700	34700	A_33_P3347522	Unknown
A_33_P3347787	-0.15457	Compromised	0.15457	Compromised	0	-1.45937	Compromised	-1.35376	Compromised	-1.40656	0.0132189	5.82	6.22	2.14	2.11	A_33_P3347787	Unknown
A_33_P3348046	-0.474225	Compromised	0.474225	Compromised	0	-0.0638146	Compromised	0.147058	Compromised	0.0416214	0.939529	1.64	2.73	1.98	2.1	A_33_P3348046	Unknown
A_33_P3348079	0.247038	Compromised	-0.247038	Compromised	0	-0.152658	Compromised	0.0509467	Compromised	-0.0508554	0.866617	2.89	1.77	1.99	2.1	A_33_P3348079	Unknown
A_33_P3348151	0.054342	Detected	-0.054342	Detected	0	0.147144	Detected	-0.385346	Compromised	-0.119101	0.703967	16	12.8	15.5	9.82	A_33_P3348151	Unknown
A_33_P3348194	-0.15473	Compromised	0.15473	Compromised	0	0.227433	Compromised	1.62692	Compromised	0.927175	0.32501	1.74	1.86	2.06	4.98	A_33_P3348194	Unknown
A_33_P3348328	0.376088	Compromised	-0.376088	Compromised	-4.7e-07	-0.279115	Compromised	-0.087244	Compromised	-0.18318	0.683442	3.71	1.9	2.14	2.24	A_33_P3348328	Unknown
A_33_P3348509	-0.0829692	Detected	0.0829692	Detected	0	-0.0530696	Detected	-0.772576	Detected	-0.412823	0.379782	24.8	24	23	12.8	A_33_P3348509	Unknown
A_33_P3348670	-0.152371	Compromised	0.152371	Compromised	-4.7e-07	-0.417398	Compromised	-0.538633	Compromised	-0.478016	0.100294	3.36	3.58	2.54	2.14	A_33_P3348670	Unknown
A_33_P3348744	-0.0281758	Detected	0.0281763	Detected	4.78e-07	-0.0166378	Detected	-0.17525	Detected	-0.0959439	0.372418	4270	3830	3910	3210	A_33_P3348744	Unknown
A_33_P3348927	0.0907369	Detected	-0.0907369	Detected	0	-0.932929	Compromised	-0.761303	Compromised	-0.847116	0.0210509	18.8	14.3	8.4	8.67	A_33_P3348927	Unknown
A_33_P3349002	0.674745	Compromised	-0.674744	Compromised	5e-07	0.433718	Compromised	0.108262	Compromised	0.27099	0.733883	6.44	2.18	4.95	3.62	A_33_P3349002	Unknown
A_33_P3349025	-0.0422072	Compromised	0.0422068	Compromised	-4.76e-07	0.0963983	Compromised	0.300003	Compromised	0.1982	0.213921	1.99	1.82	1.99	2.1	A_33_P3349025	Unknown
A_33_P3349158	-0.149572	Compromised	0.149572	Compromised	0	0.298517	Compromised	1.9084	Compromised	1.10346	0.310099	1.63	1.73	2.02	5.65	A_33_P3349158	Unknown
A_33_P3349474	0.110358	Detected	-0.110358	Detected	-4.8e-07	0.219558	Detected	-0.0614719	Detected	0.0790429	0.701446	7929.99	5870	7770	5860	A_33_P3349474	Unknown
A_33_P3349501	0.0631213	Detected	-0.0631216	Detected	-2.4e-07	-1.01912	Compromised	-1.90402	Compromised	-1.46157	0.0821495	18.6	14.7	7.98	3.96	A_33_P3349501	Unknown
A_33_P3349597	0.452163	Detected	-0.452163	Detected	0	0.0306809	Detected	-0.812835	Detected	-0.391077	0.591742	690	318	468	239	A_33_P3349597	Unknown
A_33_P3349676	0.467173	Compromised	-0.467173	Compromised	4.8e-07	-1.20053	Compromised	-0.935047	Compromised	-1.06779	0.158964	6.89	3.11	1.97	2.17	A_33_P3349676	Unknown
A_33_P3349727	-0.139231	Compromised	0.139231	Compromised	0	0.265186	Compromised	0.438923	Compromised	0.352055	0.165093	1.73	1.81	2.08	2.15	A_33_P3349727	Unknown
A_33_P3350196	-0.318299	Detected	0.318298	Detected	-2.4e-07	-0.533237	Compromised	-0.818744	Compromised	-0.675991	0.192238	8.65	11.6	6.77	5.09	A_33_P3350196	Unknown
A_33_P3350247	-0.144708	Compromised	0.144708	Compromised	-4.8e-07	0.291284	Compromised	0.800124	Compromised	0.545704	0.203274	1.66	1.75	2.04	2.66	A_33_P3350247	Unknown
A_33_P3350453	0.302696	Compromised	-0.302695	Compromised	4.8e-07	-0.184689	Compromised	1.20375	Compromised	0.509531	0.570403	3.21	1.82	2.08	4.99	A_33_P3350453	Unknown
A_33_P3350549	0.228375	Detected	-0.228375	Detected	0	0.143289	Detected	-0.140318	Detected	0.00148558	0.996092	92.6	58.2	79.3	59.7	A_33_P3350549	Unknown
A_33_P3350684	-0.157863	Compromised	0.157864	Compromised	4.8e-07	0.27587	Compromised	0.532784	Compromised	0.404327	0.185335	1.63	1.75	2	2.19	A_33_P3350684	Unknown
A_33_P3350744	-0.602472	Compromised	0.602472	Detected	0	0.410853	Compromised	0.472228	Compromised	0.44154	0.540358	5.23	10.4	9.59	9.17	A_33_P3350744	Unknown
A_33_P3351062	-0.328094	Detected	0.328094	Detected	0	-0.235292	Detected	-0.447324	Compromised	-0.341308	0.426564	12.8	17.4	12.4	9.81	A_33_P3351062	Unknown
A_33_P3351166	-0.689566	Compromised	0.689566	Detected	0	0.511834	Detected	-0.634867	Compromised	-0.0615165	0.951552	5.17	11.6	10.8	4.47	A_33_P3351166	Unknown
A_33_P3351276	-0.0887363	Detected	0.0887363	Detected	0	0.448622	Detected	-0.0193183	Detected	0.214652	0.481384	24.5	23.9	32.3	21.4	A_33_P3351276	Unknown
A_33_P3351388	0.0237947	Detected	-0.0237947	Detected	0	0.0237951	Detected	-0.302096	Detected	-0.13915	0.487077	39.3	32.8	35.7	26.1	A_33_P3351388	Unknown
A_33_P3351524	0.0603788	Detected	-0.0603788	Detected	0	0.112272	Detected	-0.588702	Detected	-0.238215	0.57196	120	95.2	113	63.7	A_33_P3351524	Unknown
A_33_P3351529	0.00286198	Detected	-0.00286198	Detected	0	0.138894	Detected	0.0722322	Detected	0.105563	0.0874554	56100	48200	56000	49000	A_33_P3351529	Unknown
A_33_P3351790	-0.152905	Compromised	0.152905	Compromised	4.7e-07	1.27955	Compromised	0.484838	Compromised	0.882192	0.174043	1.66	1.77	4.07	2.15	A_33_P3351790	Unknown
A_33_P3351791	0.567915	Compromised	-0.567915	Compromised	-4.8e-07	-0.51166	Compromised	-0.299947	Compromised	-0.405803	0.555147	4.56	1.79	1.96	2.08	A_33_P3351791	Unknown
A_33_P3351920	0.036927	Detected	-0.0369272	Detected	-2.38e-07	-1.03426	Compromised	-0.315807	Compromised	-0.675033	0.202517	13.3	10.9	5.75	8.67	A_33_P3351920	Unknown
A_33_P3352011	-0.144454	Detected	0.144454	Detected	-2.4e-07	0.311634	Detected	-0.457632	Compromised	-0.0729993	0.875347	13	13.7	16.2	8.71	A_33_P3352011	Unknown
A_33_P3352268	0.324222	Detected	-0.324222	Detected	0	-0.236131	Detected	-1.79053	Compromised	-1.01333	0.351966	48.7	26.8	30	9.36	A_33_P3352268	Unknown
A_33_P3352572	-0.13799	Compromised	0.13799	Compromised	0	0.26365	Compromised	0.396297	Compromised	0.329974	0.16392	1.8	1.88	2.16	2.17	A_33_P3352572	Unknown
A_33_P3352837	0.172023	Compromised	-0.172023	Compromised	4.8e-07	1.20254	Compromised	0.721493	Compromised	0.962017	0.0829045	2.84	1.93	5.27	3.46	A_33_P3352837	Unknown
A_33_P3353275	-0.016748	Compromised	0.016748	Compromised	0	-0.0766878	Compromised	-0.448483	Compromised	-0.262585	0.294746	3.5	3.09	3.05	2.16	A_33_P3353275	Unknown
A_33_P3353431	0.738535	Compromised	-0.738536	Compromised	-5e-07	-0.60727	Compromised	-0.378438	Compromised	-0.492854	0.577374	5.68	1.76	2.03	2.18	A_33_P3353431	Unknown
A_33_P3353630	0.374681	Detected	-0.374681	Compromised	-4.7e-07	-1.00535	Compromised	-0.311084	Compromised	-0.658217	0.326463	9.14	4.69	3.19	4.73	A_33_P3353630	Unknown
A_33_P3353752	-0.15009	Compromised	0.15009	Compromised	0	1.44876	Compromised	0.551766	Compromised	1.00026	0.168719	1.61	1.71	4.43	2.18	A_33_P3353752	Unknown
A_33_P3353873	1.02026	Detected	-1.02026	Compromised	0	-0.529798	Compromised	-0.861996	Compromised	-0.695897	0.57018	18.6	3.9	5.77	4.2	A_33_P3353873	Unknown
A_33_P3353906	-0.111107	Detected	0.111107	Detected	0	-0.110905	Detected	-0.108953	Detected	-0.109929	0.426766	481	484	437	401	A_33_P3353906	Unknown
A_33_P3354553	0.186961	Detected	-0.186961	Detected	-2.4e-07	0.759749	Detected	0.484216	Detected	0.621983	0.115712	13.1	8.72	17.7	13.4	A_33_P3354553	Unknown
A_33_P3354579	-0.160696	Compromised	0.160696	Compromised	-4.7e-07	0.259541	Compromised	0.494975	Compromised	0.377258	0.198746	1.67	1.8	2.03	2.19	A_33_P3354579	Unknown
A_33_P3354731	-0.153177	Compromised	0.153177	Compromised	0	0.221496	Compromised	0.400919	Compromised	0.311208	0.221671	1.8	1.92	2.12	2.2	A_33_P3354731	Unknown
A_33_P3354783	0.700074	Detected	-0.700073	Compromised	2.6e-07	0.444602	Compromised	0.0730848	Compromised	0.258843	0.755002	8.2	2.68	6.24	4.42	A_33_P3354783	Unknown
A_33_P3354970	0.187516	Compromised	-0.187516	Compromised	0	0.494575	Compromised	-1.12626	Compromised	-0.31584	0.740698	6.54	4.35	7.35	2.19	A_33_P3354970	Unknown
A_33_P3356106	0.215055	Detected	-0.215054	Compromised	4.7e-07	-0.769089	Compromised	-0.251959	Compromised	-0.510524	0.268319	8.95	5.73	4.11	5.39	A_33_P3356106	Unknown
A_33_P3356182	-0.445313	Compromised	0.445314	Compromised	4.8e-07	1.31808	Compromised	1.12124	Compromised	1.21966	0.115991	2.62	4.19	8.08	6.46	A_33_P3356182	Unknown
A_33_P3356366	-0.147853	Compromised	0.147853	Compromised	0	0.281801	Compromised	1.51148	Compromised	0.896638	0.29197	1.7	1.8	2.08	4.47	A_33_P3356366	Unknown
A_33_P3356537	-0.308721	Compromised	0.308721	Compromised	0	1.38282	Compromised	0.313631	Compromised	0.848224	0.30316	1.67	2.21	4.9	2.14	A_33_P3356537	Unknown
A_33_P3356637	0.263527	Compromised	-0.263526	Compromised	4.8e-07	0.298669	Compromised	0.800273	Compromised	0.549471	0.270037	2.89	1.73	2.69	3.49	A_33_P3356637	Unknown
A_33_P3356696	0.375364	Detected	-0.375364	Compromised	0	0.538632	Detected	0.664615	Detected	0.601624	0.254742	17.4	8.92	17.7	17.7	A_33_P3356696	Unknown
A_33_P3357000	-0.849934	Compromised	0.849935	Compromised	5e-07	-0.444107	Compromised	-0.223708	Compromised	-0.333907	0.734405	1.72	4.82	2.07	2.21	A_33_P3357000	Unknown
A_33_P3357232	-0.149318	Compromised	0.149318	Compromised	0	0.275592	Compromised	0.499186	Compromised	0.387389	0.173443	1.64	1.74	2	2.14	A_33_P3357232	Unknown
A_33_P3357879	0.266395	Detected	-0.266395	Compromised	0	0.349718	Detected	-0.157976	Compromised	0.0958709	0.818821	13.3	7.93	12.8	8.25	A_33_P3357879	Unknown
A_33_P3358109	-0.165712	Compromised	0.165713	Compromised	4.7e-07	1.44189	Compromised	0.741324	Compromised	1.09161	0.106297	1.64	1.78	4.54	2.56	A_33_P3358109	Unknown
A_33_P3358347	-0.0195825	Detected	0.0195825	Detected	0	0.124868	Detected	-0.749149	Detected	-0.31214	0.549535	739	655	742	371	A_33_P3358347	Unknown
A_33_P3358582	0.240474	Compromised	-0.240474	Compromised	0	-0.161489	Compromised	0.0562367	Compromised	-0.0526261	0.860407	2.88	1.78	1.98	2.11	A_33_P3358582	Unknown
A_33_P3358653	-0.142033	Compromised	0.142033	Compromised	0	0.987471	Compromised	1.59103	Compromised	1.28925	0.0608798	1.59	1.67	3.16	4.4	A_33_P3358653	Unknown
A_33_P3358804	-0.0791013	Detected	0.0791013	Detected	0	-0.0485985	Detected	-0.58662	Detected	-0.317609	0.374857	37.4	36	34.7	21.9	A_33_P3358804	Unknown
A_33_P3358851	-0.857541	Compromised	0.857541	Detected	2.5e-07	-0.0987148	Compromised	-1.60427	Compromised	-0.851491	0.533325	5.12	14.5	7.87	2.54	A_33_P3358851	Unknown
A_33_P3358855	-0.0050149	Compromised	0.0050149	Compromised	0	0.32404	Compromised	-0.648633	Compromised	-0.162297	0.770348	4.11	3.57	4.69	2.19	A_33_P3358855	Unknown
A_33_P3358905	-0.0645416	Detected	0.0645416	Detected	0	-0.328206	Detected	-0.0862572	Detected	-0.207232	0.269812	30	28.3	22.7	24.6	A_33_P3358905	Unknown
A_33_P3359285	-0.169731	Compromised	0.169731	Compromised	4.8e-07	0.238763	Compromised	0.476537	Compromised	0.35765	0.226509	1.75	1.91	2.11	2.28	A_33_P3359285	Unknown
A_33_P3359408	0.348584	Compromised	-0.348584	Compromised	0	-0.272731	Compromised	-0.0998807	Compromised	-0.186306	0.65562	3.59	1.91	2.12	2.19	A_33_P3359408	Unknown
A_33_P3359428	-0.13851	Compromised	0.13851	Compromised	-4.8e-07	0.253589	Compromised	0.406666	Compromised	0.330127	0.172273	1.77	1.85	2.11	2.15	A_33_P3359428	Unknown
A_33_P3359832	-0.154584	Compromised	0.154584	Compromised	-4.8e-07	0.262006	Compromised	1.66459	Compromised	0.9633	0.311817	1.6	1.71	1.94	4.7	A_33_P3359832	Unknown
A_33_P3359846	0.597369	Compromised	-0.59737	Compromised	-5e-07	-0.408974	Compromised	-0.41815	Compromised	-0.413562	0.560333	5.44	2.05	2.46	2.24	A_33_P3359846	Unknown
A_33_P3359869	0.598047	Detected	-0.598046	Compromised	5e-07	-0.0591831	Compromised	1.10641	Compromised	0.523613	0.59467	8.42	3.17	4.85	9.97	A_33_P3359869	Unknown
A_33_P3360007	-0.244324	Compromised	0.244323	Compromised	-4.8e-07	-0.154444	Compromised	-0.327174	Compromised	-0.240809	0.450853	2.71	3.28	2.62	2.13	A_33_P3360007	Unknown
A_33_P3360758	-0.13903	Compromised	0.13903	Compromised	0	-0.214423	Compromised	-0.922589	Compromised	-0.568506	0.273653	4.57	4.78	3.94	2.21	A_33_P3360758	Unknown
A_33_P3361217	0.118088	Compromised	-0.118088	Compromised	0	-1.58037	Compromised	0.0903363	Compromised	-0.745016	0.470348	7.36	5.39	2.06	6.01	A_33_P3361217	Unknown
A_33_P3361309	-0.0884509	Detected	0.0884514	Detected	4.75e-07	-0.0310421	Detected	-0.0570612	Detected	-0.0440516	0.670982	20100	19600	19000	17100	A_33_P3361309	Unknown
A_33_P3362239	0.420264	Detected	-0.420264	Detected	0	-0.169326	Detected	-0.827209	Detected	-0.498267	0.449056	328	158	198	115	A_33_P3362239	Unknown
A_33_P3362242	-0.153451	Compromised	0.153451	Compromised	0	0.285813	Compromised	0.501778	Compromised	0.393796	0.170709	1.64	1.75	2.02	2.15	A_33_P3362242	Unknown
A_33_P3362320	0.488454	Compromised	-0.488454	Compromised	4.7e-07	-0.376437	Compromised	-0.209034	Compromised	-0.292736	0.614581	4.13	1.81	2.06	2.12	A_33_P3362320	Unknown
A_33_P3362392	-0.152905	Compromised	0.152905	Compromised	4.7e-07	0.232713	Compromised	0.471354	Compromised	0.352034	0.211176	1.66	1.77	1.97	2.13	A_33_P3362392	Unknown
A_33_P3362548	-0.0631831	Detected	0.0631831	Detected	0	-0.129588	Detected	-0.0972898	Detected	-0.113439	0.224079	77	72.5	66.8	62.6	A_33_P3362548	Unknown
A_33_P3362567	-0.00849843	Detected	0.00849843	Detected	0	0.0372384	Detected	-0.0784843	Detected	-0.020623	0.758056	401	350	376	318	A_33_P3362567	Unknown
A_33_P3362601	-0.142473	Compromised	0.142473	Compromised	0	0.772975	Compromised	0.575688	Compromised	0.674331	0.060142	1.57	1.65	2.69	2.15	A_33_P3362601	Unknown
A_33_P3362937	-0.479412	Compromised	0.479411	Compromised	-4.7e-07	-0.102458	Compromised	0.101913	Compromised	-0.00027299	0.999607	1.67	2.8	1.97	2.08	A_33_P3362937	Unknown
A_33_P3363100	0.153794	Detected	-0.153794	Detected	0	-0.167032	Detected	-1.40878	Compromised	-0.787906	0.3432	19.8	13.8	14.4	5.58	A_33_P3363100	Unknown
A_33_P3363105	-0.154584	Compromised	0.154584	Compromised	-4.8e-07	0.298718	Compromised	0.556261	Compromised	0.427489	0.167533	1.6	1.71	1.99	2.18	A_33_P3363105	Unknown
A_33_P3363161	-0.156969	Compromised	0.156969	Compromised	0	0.264809	Compromised	0.51394	Compromised	0.389374	0.191473	1.66	1.78	2.02	2.2	A_33_P3363161	Unknown
A_33_P3363173	0.00559378	Detected	-0.00559378	Detected	0	-0.0105231	Detected	0.245521	Detected	0.117499	0.455976	11.8	10.1	10.6	11.6	A_33_P3363173	Unknown
A_33_P3363254	-0.18897	Detected	0.18897	Detected	0	0.218251	Detected	1.19779	Detected	0.70802	0.309851	21.5	24.1	25.9	46.8	A_33_P3363254	Unknown
A_33_P3363290	-0.149572	Compromised	0.149572	Compromised	0	0.291357	Compromised	0.534473	Compromised	0.412915	0.165436	1.63	1.73	2.01	2.18	A_33_P3363290	Unknown
A_33_P3363507	-0.298425	Compromised	0.298425	Compromised	0	0.111483	Compromised	0.264688	Compromised	0.188086	0.60368	1.74	2.27	2.1	2.14	A_33_P3363507	Unknown
A_33_P3363650	-0.153451	Compromised	0.153451	Compromised	0	0.242312	Compromised	0.460944	Compromised	0.351628	0.202977	1.64	1.75	1.96	2.09	A_33_P3363650	Unknown
A_33_P3363690	-0.52416	Compromised	0.52416	Compromised	0	0.852025	Compromised	1.32242	Compromised	1.08722	0.198962	1.62	2.89	3.82	4.85	A_33_P3363690	Unknown
A_33_P3363893	0.653236	Compromised	-0.653236	Compromised	-5e-07	0.347413	Compromised	1.88669	Detected	1.11705	0.383768	5.62	1.96	4.13	11	A_33_P3363893	Unknown
A_33_P3363959	-0.141253	Compromised	0.141253	Compromised	-4.7e-07	0.269555	Compromised	0.37582	Compromised	0.322687	0.16593	1.83	1.92	2.21	2.18	A_33_P3363959	Unknown
A_33_P3364358	-0.158478	Compromised	0.158477	Compromised	-4.8e-07	0.285835	Compromised	0.549981	Compromised	0.417908	0.180042	1.61	1.73	1.99	2.19	A_33_P3364358	Unknown
A_33_P3364493	0.542892	Detected	-0.542892	Detected	0	-0.0905156	Detected	-1.17645	Detected	-0.633483	0.49609	125	50.8	73.2	31.6	A_33_P3364493	Unknown
A_33_P3364498	-0.250795	Detected	0.250795	Detected	0	0.067632	Detected	-0.852189	Detected	-0.392278	0.532044	1130	1380	1280	620	A_33_P3364498	Unknown
A_33_P3364836	-0.162138	Detected	0.162138	Detected	0	-1.53223	Compromised	-0.51587	Detected	-1.02405	0.194871	17.5	18.9	6.15	11.4	A_33_P3364836	Unknown
A_33_P3364929	-0.14809	Compromised	0.14809	Compromised	-4.7e-07	0.211688	Compromised	0.429864	Compromised	0.320776	0.22328	1.69	1.79	1.97	2.1	A_33_P3364929	Unknown
A_33_P3365057	-0.624657	Compromised	0.624657	Compromised	0	-0.204869	Compromised	0.612276	Compromised	0.203703	0.810519	1.58	3.24	1.92	3.1	A_33_P3365057	Unknown
A_33_P3365200	-0.483916	Compromised	0.483916	Compromised	0	1.69835	Compromised	1.29121	Compromised	1.49478	0.104392	1.79	3.02	7.38	5.1	A_33_P3365200	Unknown
A_33_P3365267	-0.0167115	Detected	0.0167115	Detected	0	-0.0201247	Detected	-2.33934	Compromised	-1.17973	0.416068	12.8	11.3	11.6	2.13	A_33_P3365267	Unknown
A_33_P3365501	-0.393716	Compromised	0.393716	Compromised	4.8e-07	-0.594859	Compromised	0.782907	Compromised	0.0940241	0.916501	4.48	6.67	3.54	8.43	A_33_P3365501	Unknown
A_33_P3365644	0.43688	Compromised	-0.43688	Compromised	-4.7e-07	1.03925	Compromised	-0.022099	Compromised	0.508575	0.536433	3.93	1.85	5.42	2.38	A_33_P3365644	Unknown
A_33_P3365666	-0.292788	Detected	0.292788	Detected	0	-0.297308	Detected	-1.05245	Detected	-0.674877	0.293323	36	46.6	32.6	17.7	A_33_P3365666	Unknown
A_33_P3365845	-0.216955	Compromised	0.216955	Compromised	0	-1.31388	Compromised	-1.12531	Compromised	-1.2196	0.0356234	4.78	5.57	2.03	2.12	A_33_P3365845	Unknown
A_33_P3365963	-0.228027	Detected	0.228027	Detected	0	0.435159	Detected	-0.0249841	Detected	0.205087	0.59139	862	1020	1240	826	A_33_P3365963	Unknown
A_33_P3366179	-0.147158	Compromised	0.147158	Compromised	4.8e-07	0.396024	Compromised	0.791327	Compromised	0.593676	0.1376	1.73	1.83	2.29	2.76	A_33_P3366179	Unknown
A_33_P3366224	0.126069	Detected	-0.126068	Detected	4.7e-07	-0.0307817	Detected	-0.230374	Detected	-0.130578	0.502015	2430	1760	1980	1580	A_33_P3366224	Unknown
A_33_P3366321	-0.147387	Compromised	0.147387	Compromised	-4.8e-07	0.279199	Compromised	0.43913	Compromised	0.359164	0.165486	1.72	1.82	2.1	2.15	A_33_P3366321	Unknown
A_33_P3366412	0.0586145	Detected	-0.0586145	Detected	0	-1.31249	Compromised	-0.842751	Compromised	-1.07762	0.0469377	12.7	10.1	4.46	5.66	A_33_P3366412	Unknown
A_33_P3366471	-0.15879	Compromised	0.158791	Compromised	4.8e-07	0.294512	Compromised	1.36883	Compromised	0.831672	0.2759	1.6	1.72	1.99	3.84	A_33_P3366471	Unknown
A_33_P3366493	-0.531118	Compromised	0.531118	Detected	0	-1.81654	Compromised	-0.0371134	Compromised	-0.926826	0.465463	6.44	11.6	2.4	7.55	A_33_P3366493	Unknown
A_33_P3366614	0.158636	Compromised	-0.158635	Compromised	4.8e-07	-0.0290742	Compromised	0.669614	Compromised	0.32027	0.49169	2.47	1.71	1.97	2.93	A_33_P3366614	Unknown
A_33_P3366739	0.0208993	Compromised	-0.0208988	Compromised	4.77e-07	0.699238	Compromised	0.298785	Compromised	0.499011	0.131421	2.16	1.81	3.14	2.18	A_33_P3366739	Unknown
A_33_P3367681	-0.159107	Compromised	0.159107	Compromised	0	0.288668	Compromised	0.560783	Compromised	0.424726	0.17964	1.59	1.71	1.97	2.18	A_33_P3367681	Unknown
A_33_P3367970	-0.0118208	Detected	0.0118208	Detected	0	-0.0956078	Detected	-0.136443	Detected	-0.116026	0.038948	20.3	17.8	17.4	15.5	A_33_P3367970	Unknown
A_33_P3368034	-0.505128	Compromised	0.505128	Compromised	0	-0.0663991	Compromised	1.23195	Compromised	0.582774	0.552081	1.6	2.78	1.97	4.44	A_33_P3368034	Unknown
A_33_P3368144	0.248039	Detected	-0.248039	Compromised	0	0.474108	Detected	-0.647988	Compromised	-0.0869398	0.900283	11.2	6.85	11.9	5.01	A_33_P3368144	Unknown
A_33_P3368303	-0.157863	Compromised	0.157864	Compromised	4.8e-07	0.268639	Compromised	0.526182	Compromised	0.39741	0.190375	1.63	1.75	1.99	2.18	A_33_P3368303	Unknown
A_33_P3368445	0.655299	Compromised	-0.655298	Compromised	4.7e-07	1.00895	Compromised	-0.676267	Compromised	0.166342	0.890472	6.47	2.25	7.51	2.14	A_33_P3368445	Unknown
A_33_P3368822	-0.153941	Compromised	0.15394	Compromised	-4.8e-07	0.217499	Compromised	0.41783	Compromised	0.317664	0.225835	1.77	1.89	2.08	2.19	A_33_P3368822	Unknown
A_33_P3368900	-0.218064	Detected	0.218064	Detected	0	-0.0521724	Detected	-0.20485	Detected	-0.128511	0.63398	41.9	48.9	42.7	35.2	A_33_P3368900	Unknown
A_33_P3369398	-0.143205	Compromised	0.143205	Compromised	0	0.261212	Compromised	0.421465	Compromised	0.341339	0.173027	1.73	1.82	2.08	2.13	A_33_P3369398	Unknown
A_33_P3369731	1.08759	Detected	-1.08759	Compromised	5e-07	0.995548	Compromised	0.613046	Compromised	0.804297	0.542137	11.1	2.12	9.46	6.65	A_33_P3369731	Unknown
A_33_P3369864	-0.158169	Compromised	0.158169	Compromised	0	0.277211	Compromised	0.541357	Compromised	0.409284	0.185389	1.62	1.74	1.99	2.19	A_33_P3369864	Unknown
A_33_P3370217	-0.147853	Compromised	0.147853	Compromised	0	0.210718	Compromised	0.42159	Compromised	0.316154	0.223815	1.7	1.8	1.98	2.1	A_33_P3370217	Unknown
A_33_P3370325	-0.595609	Compromised	0.595609	Compromised	5e-07	-0.186701	Compromised	0.0708423	Compromised	-0.0579293	0.932931	1.65	3.25	1.99	2.18	A_33_P3370325	Unknown
A_33_P3370515	-0.0908833	Detected	0.0908833	Detected	0	0.00559807	Detected	-0.112346	Detected	-0.0533738	0.671031	139000	136000	135000	114000	A_33_P3370515	Unknown
A_33_P3370612	-0.15879	Compromised	0.158791	Compromised	4.8e-07	0.287244	Compromised	0.552055	Compromised	0.419649	0.179516	1.6	1.72	1.98	2.18	A_33_P3370612	Unknown
A_33_P3371144	-0.143354	Detected	0.143353	Detected	-4.8e-07	0.0429049	Detected	-0.352397	Detected	-0.154746	0.591041	2680	2820	2770	1930	A_33_P3371144	Unknown
A_33_P3371243	0.426128	Compromised	-0.426128	Compromised	5e-07	-0.309107	Compromised	-0.149016	Compromised	-0.229062	0.650054	3.83	1.83	2.09	2.14	A_33_P3371243	Unknown
A_33_P3371260	0.554342	Compromised	-0.554342	Compromised	-4.7e-07	-0.754512	Compromised	-0.218966	Compromised	-0.486739	0.512018	5.4	2.16	1.98	2.63	A_33_P3371260	Unknown
A_33_P3371450	-0.1346	Compromised	0.1346	Compromised	0	0.257499	Compromised	0.383482	Compromised	0.32049	0.163767	1.77	1.84	2.11	2.11	A_33_P3371450	Unknown
A_33_P3371769	-0.163153	Detected	0.163153	Detected	0	0.088515	Detected	-0.183723	Detected	-0.0476038	0.843531	1840	1990	1990	1510	A_33_P3371769	Unknown
A_33_P3372090	-0.231511	Detected	0.231511	Detected	0	-0.183671	Detected	0.143131	Detected	-0.02027	0.949484	16.4	19.5	15.4	17.7	A_33_P3372090	Unknown
A_33_P3372104	0.173502	Compromised	-0.173502	Compromised	0	-0.503842	Compromised	-0.648593	Compromised	-0.576218	0.0919896	4.63	3.14	2.63	2.18	A_33_P3372104	Unknown
A_33_P3372207	0.505911	Detected	-0.505911	Compromised	-2.5e-07	-0.402026	Compromised	0.413806	Compromised	0.00589025	0.993591	12.6	5.39	6.1	9.84	A_33_P3372207	Unknown
A_33_P3372659	0.718468	Compromised	-0.718468	Compromised	-5e-07	-0.613025	Compromised	0.345332	Compromised	-0.133847	0.891061	5.43	1.73	1.96	3.49	A_33_P3372659	Unknown
A_33_P3373009	-0.445658	Compromised	0.445658	Compromised	0	0.0118351	Compromised	-0.0366793	Compromised	-0.0124221	0.980323	1.9	3.04	2.37	2.1	A_33_P3373009	Unknown
A_33_P3373014	-0.247438	Compromised	0.247437	Compromised	-4.7e-07	0.172799	Compromised	0.414806	Compromised	0.293803	0.397832	1.67	2.03	2.03	2.2	A_33_P3373014	Unknown
A_33_P3373119	0.0979238	Detected	-0.097924	Compromised	-2.38e-07	-0.511115	Compromised	0.270254	Compromised	-0.12043	0.793144	11.3	8.51	6.73	10.6	A_33_P3373119	Unknown
A_33_P3373194	-0.13684	Compromised	0.13684	Compromised	0	0.262226	Compromised	0.552398	Compromised	0.407312	0.177865	1.87	1.95	2.24	2.51	A_33_P3373194	Unknown
A_33_P3373200	1.25087	Detected	-1.25087	Detected	0	-0.0793513	Detected	-0.365266	Detected	-0.222309	0.876106	84.7	12.9	30.6	23	A_33_P3373200	Unknown
A_33_P3373418	-0.159107	Compromised	0.159107	Compromised	0	0.288668	Compromised	0.547487	Compromised	0.418077	0.178362	1.59	1.71	1.97	2.16	A_33_P3373418	Unknown
A_33_P3373580	-0.462721	Compromised	0.462721	Compromised	0	-0.220493	Compromised	-0.0316219	Compromised	-0.126057	0.814531	1.88	3.08	2.02	2.11	A_33_P3373580	Unknown
A_33_P3373584	-0.147387	Compromised	0.147387	Compromised	-4.8e-07	0.216005	Compromised	0.432404	Compromised	0.324205	0.218202	1.72	1.82	2.01	2.14	A_33_P3373584	Unknown
A_33_P3373690	0.841831	Compromised	-0.841831	Compromised	0	-0.0926266	Compromised	-0.50551	Compromised	-0.299068	0.762975	6.48	1.74	3.08	2.12	A_33_P3373690	Unknown
A_33_P3373715	-0.0814855	Detected	0.0814855	Detected	0	0.0864642	Detected	0.0267019	Detected	0.056583	0.58135	14.6	14.1	14.9	13.1	A_33_P3373715	Unknown
A_33_P3373795	-0.158169	Compromised	0.158169	Compromised	0	0.284443	Compromised	0.541357	Compromised	0.4129	0.179959	1.62	1.74	2	2.19	A_33_P3373795	Unknown
A_33_P3373970	0.166925	Compromised	-0.166925	Compromised	-4.8e-07	-0.0266657	Compromised	1.74111	Compromised	0.857223	0.441175	2.82	1.93	2.24	6.99	A_33_P3373970	Unknown
A_33_P3374215	-0.0973542	Detected	0.0973542	Detected	0	-0.100556	Detected	-0.590341	Detected	-0.345449	0.320208	23.5	23.2	21.3	13.9	A_33_P3374215	Unknown
A_33_P3374253	0.158635	Detected	-0.158635	Detected	0	0.407832	Detected	-0.35665	Detected	0.0255909	0.956317	36.4	25.2	39.3	21.2	A_33_P3374253	Unknown
A_33_P3374365	-0.678368	Detected	0.678368	Detected	0	0.26894	Detected	-0.501241	Detected	-0.116151	0.895289	153	338	268	144	A_33_P3374365	Unknown
A_33_P3374903	-0.0834942	Detected	0.0834942	Detected	0	0.23589	Detected	0.843322	Detected	0.539606	0.228823	41.2	39.9	46.7	65.2	A_33_P3374903	Unknown
A_33_P3374982	0.282505	Compromised	-0.282505	Compromised	-4.8e-07	1.15082	Compromised	0.551609	Compromised	0.851215	0.174671	3.19	1.86	5.29	3.2	A_33_P3374982	Unknown
A_33_P3375026	0.395891	Detected	-0.395891	Compromised	0	-0.0706787	Compromised	0.441429	Compromised	0.185375	0.732141	11.5	5.73	7.56	9.88	A_33_P3375026	Unknown
A_33_P3375269	-0.330065	Compromised	0.330065	Compromised	0	0.524747	Compromised	-0.663378	Compromised	-0.0693154	0.928066	3.36	4.58	5.52	2.22	A_33_P3375269	Unknown
A_33_P3375348	-0.115667	Detected	0.115667	Detected	-2.35e-07	0.25892	Detected	-0.0561297	Compromised	0.101395	0.655578	9.51	9.63	11.2	8.25	A_33_P3375348	Unknown
A_33_P3375496	-0.0347543	Detected	0.0347543	Detected	0	0.0467706	Detected	0.501137	Detected	0.273954	0.35552	232	210	223	280	A_33_P3375496	Unknown
A_33_P3375513	0.174971	Compromised	-0.174971	Compromised	-4.7e-07	-0.0671315	Compromised	0.175427	Compromised	0.054148	0.822991	2.63	1.78	2.02	2.19	A_33_P3375513	Unknown
A_33_P3375626	-0.146932	Compromised	0.146931	Compromised	-4.8e-07	0.296924	Compromised	0.449501	Compromised	0.373212	0.152894	1.74	1.84	2.15	2.19	A_33_P3375626	Unknown
A_33_P3375657	-0.167558	Compromised	0.167558	Compromised	4.8e-07	-0.768844	Compromised	-0.543814	Compromised	-0.656329	0.0829658	3.29	3.58	1.97	2.11	A_33_P3375657	Unknown
A_33_P3375794	-0.154584	Compromised	0.154584	Compromised	-4.8e-07	0.284145	Compromised	0.536269	Compromised	0.410207	0.176028	1.6	1.71	1.97	2.15	A_33_P3375794	Unknown
A_33_P3375889	-0.828239	Compromised	0.828239	Compromised	4.8e-07	-0.420985	Compromised	-0.200143	Compromised	-0.310564	0.745814	1.71	4.65	2.06	2.2	A_33_P3375889	Unknown
A_33_P3375899	0.427699	Detected	-0.427699	Compromised	-2.5e-07	-0.571199	Compromised	0.359388	Compromised	-0.105906	0.882332	9.9	4.72	4.5	7.86	A_33_P3375899	Unknown
A_33_P3375910	-0.45104	Compromised	0.45104	Detected	0	0.746047	Detected	0.489561	Detected	0.617804	0.318352	7.01	11.3	14.6	11.2	A_33_P3375910	Unknown
A_33_P3376021	-0.159107	Compromised	0.159107	Compromised	0	0.288668	Compromised	0.560783	Compromised	0.424726	0.17964	1.59	1.71	1.97	2.18	A_33_P3376021	Unknown
A_33_P3376075	-0.185468	Detected	0.185468	Detected	0	0.11083	Detected	-0.475468	Detected	-0.182319	0.65164	32.9	36.7	36.7	22.4	A_33_P3376075	Unknown
A_33_P3376273	0.123441	Detected	-0.123441	Compromised	2.36e-07	0.59503	Detected	1.46238	Detected	1.0287	0.15005	10.4	7.56	13.1	21.9	A_33_P3376273	Unknown
A_33_P3376745	-0.496127	Compromised	0.496127	Compromised	0	0.686703	Compromised	0.675727	Compromised	0.681215	0.30343	2.57	4.41	5.3	4.82	A_33_P3376745	Unknown
A_33_P3376781	-0.140827	Detected	0.140827	Detected	0	0.273299	Detected	-0.463798	Detected	-0.0952494	0.831725	556	583	673	370	A_33_P3376781	Unknown
A_33_P3376836	0.0852711	Detected	-0.0852711	Detected	0	-0.0927956	Detected	0.0200126	Detected	-0.0363915	0.755918	1370	1050	1100	1090	A_33_P3376836	Unknown
A_33_P3377274	0.0476937	Detected	-0.0476937	Detected	0	-0.544741	Detected	-0.705639	Detected	-0.62519	0.0216538	40.5	32.7	24.4	20	A_33_P3377274	Unknown
A_33_P3377714	0.128823	Compromised	-0.128823	Compromised	0	0.179585	Compromised	0.453036	Compromised	0.316311	0.234254	2.37	1.71	2.23	2.47	A_33_P3377714	Unknown
A_33_P3378269	0.389147	Compromised	-0.389147	Compromised	0	-0.0872226	Compromised	-0.00746202	Compromised	-0.0473423	0.914736	3.4	1.71	2.22	2.15	A_33_P3378269	Unknown
A_33_P3378412	0.443514	Detected	-0.443514	Compromised	0	0.0393012	Compromised	0.57882	Detected	0.309061	0.611994	14	6.53	9.61	12.8	A_33_P3378412	Unknown
A_33_P3378684	0.0034771	Compromised	-0.0034771	Compromised	0	0.122183	Compromised	0.25483	Compromised	0.188507	0.104948	2.19	1.88	2.16	2.17	A_33_P3378684	Unknown
A_33_P3378737	-0.696783	Compromised	0.696783	Compromised	0	-0.26557	Compromised	-0.064889	Compromised	-0.165229	0.836274	1.69	3.83	2.07	2.18	A_33_P3378737	Unknown
A_33_P3379056	0.372929	Detected	-0.372929	Detected	0	-0.618613	Detected	-1.05706	Compromised	-0.837835	0.192384	31.3	16.1	14.3	9.67	A_33_P3379056	Unknown
A_33_P3379136	-0.154876	Compromised	0.154876	Compromised	4.7e-07	0.300203	Compromised	0.571617	Compromised	0.43591	0.168485	1.59	1.7	1.98	2.19	A_33_P3379136	Unknown
A_33_P3379231	-0.133131	Compromised	0.133131	Compromised	0	0.297784	Compromised	0.372466	Compromised	0.335125	0.136279	1.87	1.94	2.29	2.21	A_33_P3379231	Unknown
A_33_P3379776	-0.154584	Compromised	0.154584	Compromised	-4.8e-07	0.298718	Compromised	0.562863	Compromised	0.43079	0.168258	1.6	1.71	1.99	2.19	A_33_P3379776	Unknown
A_33_P3380006	0.395294	Compromised	-0.395294	Compromised	5e-07	0.808369	Compromised	-0.123751	Compromised	0.342309	0.631758	3.77	1.88	4.56	2.19	A_33_P3380006	Unknown
A_33_P3380076	-0.137322	Compromised	0.137322	Compromised	-4.8e-07	0.285076	Compromised	0.378491	Compromised	0.331784	0.149436	1.84	1.92	2.24	2.19	A_33_P3380076	Unknown
A_33_P3380252	-0.143001	Compromised	0.143	Compromised	-4.7e-07	0.273761	Compromised	0.446829	Compromised	0.360295	0.163882	1.74	1.83	2.11	2.18	A_33_P3380252	Unknown
A_33_P3380913	0.247153	Detected	-0.247153	Detected	0	-0.00251245	Detected	-0.0691741	Detected	-0.0358433	0.898893	17.8	10.9	13.6	11.9	A_33_P3380913	Unknown
A_33_P3381132	0.677471	Compromised	-0.677472	Compromised	-4.8e-07	0.665011	Compromised	0.858109	Compromised	0.76156	0.381591	5.13	1.73	4.62	4.84	A_33_P3381132	Unknown
A_33_P3381292	-0.395264	Detected	0.395264	Detected	0	0.0541999	Detected	-0.345811	Detected	-0.145806	0.773319	62.8	93.7	77.9	54.1	A_33_P3381292	Unknown
A_33_P3381305	0.425254	Detected	-0.425254	Detected	0	-0.153832	Detected	-0.682859	Detected	-0.418345	0.49142	347	166	211	134	A_33_P3381305	Unknown
A_33_P3381443	-0.160365	Compromised	0.160364	Compromised	-4.8e-07	0.998032	Compromised	0.424558	Compromised	0.711295	0.162783	1.81	1.95	3.67	2.26	A_33_P3381443	Unknown
A_33_P3381613	0.624476	Compromised	-0.624476	Compromised	4.7e-07	0.38081	Compromised	0.319486	Compromised	0.350148	0.631816	6.53	2.37	5.01	4.4	A_33_P3381613	Unknown
A_33_P3381762	-0.360629	Detected	0.360629	Detected	0	0.0161369	Detected	-0.0184872	Detected	-0.00117517	0.997698	507	721	598	535	A_33_P3381762	Unknown
A_33_P3381796	-0.38321	Compromised	0.38321	Compromised	4.8e-07	-0.47517	Compromised	0.388598	Compromised	-0.0432861	0.947063	4.13	6.06	3.52	5.87	A_33_P3381796	Unknown
A_33_P3382105	0.156206	Detected	-0.156206	Detected	0	-0.0111039	Detected	-0.373098	Detected	-0.192101	0.506008	560	389	453	323	A_33_P3382105	Unknown
A_33_P3382111	-0.11315	Detected	0.11315	Detected	0	-0.227645	Compromised	-0.70155	Compromised	-0.464598	0.21886	11	11.1	9.23	6.09	A_33_P3382111	Unknown
A_33_P3382118	0.103823	Detected	-0.103823	Detected	0	-0.198144	Detected	0.464439	Detected	0.133147	0.738269	494	369	364	528	A_33_P3382118	Unknown
A_33_P3382137	-0.252505	Compromised	0.252505	Compromised	0	1.26014	Compromised	0.297061	Compromised	0.778601	0.288496	1.74	2.13	4.51	2.12	A_33_P3382137	Unknown
A_33_P3382634	0.0953264	Detected	-0.0953267	Detected	-2.4e-07	-0.181105	Detected	0.0732019	Detected	-0.0539517	0.766575	17.2	13	12.9	14.1	A_33_P3382634	Unknown
A_33_P3382685	-0.154011	Compromised	0.154011	Compromised	4.8e-07	0.295796	Compromised	0.532279	Compromised	0.414038	0.166621	1.62	1.73	2.01	2.17	A_33_P3382685	Unknown
A_33_P3382949	0.0099268	Compromised	-0.0099268	Compromised	0	-0.176308	Compromised	0.407782	Compromised	0.115737	0.730313	2.48	2.11	1.98	2.72	A_33_P3382949	Unknown
A_33_P3383009	0.495487	Compromised	-0.495487	Compromised	0	-0.362683	Compromised	-0.282504	Compromised	-0.322594	0.582941	4.47	1.94	2.24	2.17	A_33_P3383009	Unknown
A_33_P3383075	-0.695636	Compromised	0.695636	Compromised	0	-0.618142	Compromised	-0.424414	Compromised	-0.521278	0.535298	2.17	4.91	2.08	2.18	A_33_P3383075	Unknown
A_33_P3383084	-0.147853	Compromised	0.147853	Compromised	0	0.281801	Compromised	0.475529	Compromised	0.378665	0.165445	1.7	1.8	2.08	2.18	A_33_P3383084	Unknown
A_33_P3383371	0.0399015	Detected	-0.0399015	Detected	0	-0.371349	Detected	-0.680734	Detected	-0.526042	0.0811604	136	111	92.9	68.7	A_33_P3383371	Unknown
A_33_P3383486	-0.587037	Compromised	0.587037	Compromised	0	-0.196892	Compromised	0.0199447	Compromised	-0.0884738	0.895773	1.68	3.27	2	2.13	A_33_P3383486	Unknown
A_33_P3383531	0.679898	Compromised	-0.679898	Compromised	0	-1.0573	Compromised	-0.424082	Compromised	-0.74069	0.427458	7.23	2.43	1.97	2.8	A_33_P3383531	Unknown
A_33_P3383762	-0.261578	Detected	0.261578	Detected	0	0.310234	Detected	-0.588615	Detected	-0.13919	0.81403	21.7	26.9	29.3	14.4	A_33_P3383762	Unknown
A_33_P3383900	0.239566	Compromised	-0.239566	Compromised	0	-0.069582	Compromised	-0.279937	Compromised	-0.17476	0.572929	4.46	2.76	3.27	2.59	A_33_P3383900	Unknown
A_33_P3384255	-0.349108	Compromised	0.349108	Compromised	0	-0.479281	Compromised	-0.338031	Compromised	-0.408656	0.369976	4.53	6.34	3.76	3.8	A_33_P3384255	Unknown
A_33_P3384337	-0.371279	Compromised	0.371279	Compromised	0	0.0368447	Compromised	0.130113	Compromised	0.0834787	0.84418	1.85	2.67	2.23	2.18	A_33_P3384337	Unknown
A_33_P3384427	-0.144049	Compromised	0.144049	Compromised	4.8e-07	0.266103	Compromised	0.461128	Compromised	0.363615	0.171746	1.69	1.78	2.04	2.14	A_33_P3384427	Unknown
A_33_P3384552	-0.125656	Compromised	0.125656	Compromised	-4.8e-07	1.11351	Compromised	1.61441	Compromised	1.36396	0.0397059	1.87	1.92	4.01	5.2	A_33_P3384552	Unknown
A_33_P3384913	-0.15879	Compromised	0.158791	Compromised	4.8e-07	0.301743	Compromised	0.558658	Compromised	0.430201	0.169775	1.6	1.72	2	2.19	A_33_P3384913	Unknown
A_33_P3384942	-0.148572	Compromised	0.148573	Compromised	4.8e-07	0.257381	Compromised	0.453411	Compromised	0.355396	0.183953	1.67	1.77	2.01	2.11	A_33_P3384942	Unknown
A_33_P3385351	0.269229	Detected	-0.269229	Detected	0	0.105565	Detected	-0.433136	Detected	-0.163785	0.70905	164	97.4	133	83.9	A_33_P3385351	Unknown
A_33_P3385431	-0.161237	Compromised	0.161236	Compromised	-4.7e-07	0.229556	Compromised	0.428518	Compromised	0.329037	0.224566	1.78	1.92	2.12	2.23	A_33_P3385431	Unknown
A_33_P3385441	-0.149829	Compromised	0.149829	Compromised	0	0.292782	Compromised	0.53646	Compromised	0.414621	0.164888	1.62	1.72	2	2.17	A_33_P3385441	Unknown
A_33_P3385671	-0.292807	Compromised	0.292808	Compromised	4.8e-07	0.148122	Compromised	0.384604	Compromised	0.266363	0.487748	1.63	2.11	2.01	2.17	A_33_P3385671	Unknown
A_33_P3385912	-0.1346	Compromised	0.1346	Compromised	0	0.243759	Compromised	0.390303	Compromised	0.317031	0.174468	1.77	1.84	2.09	2.12	A_33_P3385912	Unknown
A_33_P3386147	-0.122879	Compromised	0.122878	Compromised	-4.75e-07	0.461267	Compromised	-0.269223	Compromised	0.0960219	0.82648	3.51	3.59	4.78	2.64	A_33_P3386147	Unknown
A_33_P3386487	-0.15373	Compromised	0.153729	Compromised	-4.8e-07	0.287199	Compromised	0.48323	Compromised	0.385214	0.168973	1.63	1.74	2.01	2.11	A_33_P3386487	Unknown
A_33_P3387016	-0.277546	Compromised	0.277546	Compromised	4.7e-07	0.102067	Compromised	0.620057	Compromised	0.361062	0.441929	1.87	2.37	2.21	2.9	A_33_P3387016	Unknown
A_33_P3387075	0.24953	Compromised	-0.24953	Compromised	0	-1.10527	Compromised	-0.910903	Compromised	-1.00809	0.0638772	5.8	3.54	2.06	2.16	A_33_P3387075	Unknown
A_33_P3387095	-0.621431	Compromised	0.621432	Detected	2.5e-07	-0.174825	Compromised	-1.44785	Compromised	-0.811339	0.458013	4.58	9.35	5.67	2.15	A_33_P3387095	Unknown
A_33_P3387429	-0.970785	Compromised	0.970786	Detected	4.6e-07	0.40916	Compromised	-0.904389	Compromised	-0.247615	0.852256	3.35	11.1	7.92	2.92	A_33_P3387429	Unknown
A_33_P3387656	-0.122304	Compromised	0.122304	Compromised	-4.8e-07	0.249974	Compromised	0.348735	Compromised	0.299355	0.151281	1.82	1.86	2.14	2.1	A_33_P3387656	Unknown
A_33_P3388527	-0.273137	Detected	0.273137	Detected	0	0.251581	Detected	-0.643915	Detected	-0.196167	0.744319	46.6	58.7	60.9	30	A_33_P3388527	Unknown
A_33_P3388883	0.0614872	Detected	-0.0614872	Detected	0	-0.0974798	Detected	-0.618136	Detected	-0.357808	0.312834	27.9	22.1	22.7	14.5	A_33_P3388883	Unknown
A_33_P3389028	0.226232	Compromised	-0.226232	Compromised	0	0.135733	Compromised	0.0350361	Compromised	0.0853844	0.74791	3.95	2.49	3.37	2.88	A_33_P3389028	Unknown
A_33_P3389578	0.410137	Detected	-0.410137	Detected	0	0.341828	Detected	-0.836839	Detected	-0.247506	0.763184	47.9	23.4	41.5	16.8	A_33_P3389578	Unknown
A_33_P3389668	0.233895	Detected	-0.233895	Detected	0	0.153188	Detected	-0.0589976	Compromised	0.0470951	0.871415	15.6	9.73	13.4	10.6	A_33_P3389668	Unknown
A_33_P3389758	0.0320051	Detected	-0.0320051	Compromised	0	0.147354	Compromised	-0.481453	Compromised	-0.16705	0.649887	9.38	7.74	9.23	5.47	A_33_P3389758	Unknown
A_33_P3390086	0.170393	Detected	-0.170393	Detected	0	0.0288904	Detected	0.0768716	Detected	0.052881	0.787651	323	220	266	252	A_33_P3390086	Unknown
A_33_P3390097	0.320453	Compromised	-0.320453	Compromised	0	-0.636099	Compromised	-1.02201	Compromised	-0.829057	0.156994	6.58	3.64	3.08	2.16	A_33_P3390097	Unknown
A_33_P3390387	-0.148572	Compromised	0.148573	Compromised	4.8e-07	0.235685	Compromised	0.453411	Compromised	0.344548	0.202305	1.67	1.77	1.98	2.11	A_33_P3390387	Unknown
A_33_P3390678	-0.2852	Compromised	0.2852	Compromised	0	0.0987711	Compromised	0.291558	Compromised	0.195164	0.583293	1.78	2.28	2.11	2.21	A_33_P3390678	Unknown
A_33_P3390753	-0.146339	Compromised	0.146339	Compromised	-4.8e-07	0.279296	Compromised	0.484847	Compromised	0.382071	0.166122	1.59	1.68	1.94	2.05	A_33_P3390753	Unknown
A_33_P3390823	-0.0558281	Detected	0.0558281	Detected	0	0.444816	Detected	-0.812934	Detected	-0.184059	0.7981	60.3	56.2	77.5	29.7	A_33_P3390823	Unknown
A_33_P3390939	0.992561	Compromised	-0.992562	Compromised	-4.6e-07	0.58298	Compromised	0.518972	Compromised	0.550976	0.634785	7.94	1.73	5.43	4.76	A_33_P3390939	Unknown
A_33_P3391120	0.142437	Compromised	-0.142438	Compromised	-4.7e-07	-0.0225735	Compromised	0.412282	Compromised	0.194854	0.531652	2.74	1.94	2.22	2.75	A_33_P3391120	Unknown
A_33_P3391295	0.0373683	Compromised	-0.0373683	Compromised	0	0.0837803	Compromised	0.301957	Compromised	0.192869	0.236376	2.1	1.72	1.97	2.1	A_33_P3391295	Unknown
A_33_P3391390	-0.149877	Compromised	0.149877	Compromised	0	0.213435	Compromised	0.407163	Compromised	0.310299	0.224196	1.78	1.89	2.08	2.18	A_33_P3391390	Unknown
A_33_P3391496	-0.34874	Detected	0.34874	Detected	0	-0.0673332	Detected	0.18858	Detected	0.0606234	0.885363	17.3	24.2	19.1	20.9	A_33_P3391496	Unknown
A_33_P3391511	-0.983472	Compromised	0.983472	Compromised	0	-0.714667	Compromised	1.44569	Compromised	0.365511	0.825781	1.8	6.07	1.97	8.07	A_33_P3391511	Unknown
A_33_P3391536	-0.0409412	Detected	0.0409412	Detected	0	0.100124	Detected	-0.709014	Detected	-0.304445	0.532117	58.6	53.5	58.7	30.7	A_33_P3391536	Unknown
A_33_P3391970	0.643415	Compromised	-0.643415	Compromised	0	-0.836109	Compromised	0.235749	Compromised	-0.30018	0.75429	7.92	2.8	2.58	4.97	A_33_P3391970	Unknown
A_33_P3392213	0.0185969	Detected	-0.0185969	Detected	0	-0.0623648	Detected	0.0179889	Detected	-0.0221879	0.665973	935	786	803	778	A_33_P3392213	Unknown
A_33_P3392350	0.0057857	Detected	-0.0057857	Detected	0	0.158842	Detected	0.143963	Detected	0.151403	0.00385247	298	255	301	273	A_33_P3392350	Unknown
A_33_P3393370	-0.00765204	Detected	0.00765204	Detected	0	-0.0955555	Detected	-0.694565	Detected	-0.39506	0.318046	117	102	100	60.5	A_33_P3393370	Unknown
A_33_P3393398	0.161125	Detected	-0.161125	Detected	-4.8e-07	-0.252066	Detected	-0.0232716	Detected	-0.137669	0.558084	2580	1780	1760	1890	A_33_P3393398	Unknown
A_33_P3393689	-0.139048	Compromised	0.139048	Compromised	0	0.250102	Compromised	0.417308	Compromised	0.333705	0.175991	1.74	1.82	2.07	2.13	A_33_P3393689	Unknown
A_33_P3393702	-0.159107	Compromised	0.159107	Compromised	0	0.997533	Compromised	0.567386	Compromised	0.782459	0.0997203	1.59	1.71	3.22	2.19	A_33_P3393702	Unknown
A_33_P3393708	-0.17369	Compromised	0.17369	Compromised	0	-1.56917	Compromised	-0.977273	Compromised	-1.27322	0.065574	5.85	6.42	2.02	2.79	A_33_P3393708	Unknown
A_33_P3393986	-0.150787	Compromised	0.150788	Compromised	4.8e-07	-1.57758	Compromised	-0.89608	Compromised	-1.23683	0.0800218	5.86	6.23	1.98	2.91	A_33_P3393986	Unknown
A_33_P3394378	0.0468669	Detected	-0.0468669	Detected	0	0.221097	Detected	-0.025579	Detected	0.0977588	0.535922	24	19.4	24.6	19	A_33_P3394378	Unknown
A_33_P3394965	-0.150353	Compromised	0.150353	Compromised	0	0.273654	Compromised	0.485794	Compromised	0.379724	0.175106	1.6	1.7	1.95	2.07	A_33_P3394965	Unknown
A_33_P3395206	-0.139231	Compromised	0.139231	Compromised	0	0.265186	Compromised	0.445618	Compromised	0.355402	0.165453	1.73	1.81	2.08	2.16	A_33_P3395206	Unknown
A_33_P3395209	-0.149572	Compromised	0.149572	Compromised	0	0.262357	Compromised	0.487388	Compromised	0.374872	0.183112	1.63	1.73	1.97	2.11	A_33_P3395209	Unknown
A_33_P3395289	-0.154584	Compromised	0.154584	Compromised	-4.8e-07	0.284145	Compromised	0.912198	Compromised	0.598171	0.229577	1.6	1.71	1.97	2.79	A_33_P3395289	Unknown
A_33_P3395310	0.0711546	Detected	-0.0711546	Detected	0	-0.127016	Detected	-0.41607	Detected	-0.271543	0.233913	29.3	22.9	23.2	17.4	A_33_P3395310	Unknown
A_33_P3395314	-0.141627	Compromised	0.141627	Compromised	4.8e-07	0.176613	Compromised	0.364584	Compromised	0.270598	0.252383	1.81	1.9	2.05	2.14	A_33_P3395314	Unknown
A_33_P3395472	-0.141393	Compromised	0.141392	Compromised	-4.8e-07	0.301219	Compromised	0.483786	Compromised	0.392502	0.144928	1.62	1.7	2	2.08	A_33_P3395472	Unknown
A_33_P3395478	-0.15879	Compromised	0.158791	Compromised	4.8e-07	0.272597	Compromised	0.525338	Compromised	0.398968	0.188216	1.6	1.72	1.96	2.14	A_33_P3395478	Unknown
A_33_P3395630	0.684537	Compromised	-0.684537	Compromised	0	-0.233547	Compromised	-0.24012	Compromised	-0.236833	0.762368	5.45	1.82	2.62	2.39	A_33_P3395630	Unknown
A_33_P3395788	0.445827	Compromised	-0.445827	Compromised	0	-0.324801	Compromised	-0.130106	Compromised	-0.227453	0.667592	3.85	1.79	2.05	2.15	A_33_P3395788	Unknown
A_33_P3395843	-0.144049	Compromised	0.144049	Compromised	4.8e-07	0.259013	Compromised	0.447581	Compromised	0.353297	0.176591	1.69	1.78	2.03	2.12	A_33_P3395843	Unknown
A_33_P3395883	0.0449119	Detected	-0.0449114	Detected	4.75e-07	0.0958662	Detected	-0.0548048	Detected	0.0205307	0.836702	4750	3850	4470	3690	A_33_P3395883	Unknown
A_33_P3396339	-0.385363	Compromised	0.385363	Compromised	4.7e-07	0.0697164	Compromised	0.334527	Compromised	0.202122	0.669019	1.59	2.34	1.98	2.18	A_33_P3396339	Unknown
A_33_P3396379	0.565584	Compromised	-0.565584	Compromised	-5e-07	0.627839	Compromised	-0.377423	Compromised	0.125208	0.883783	4.85	1.91	4.6	2.1	A_33_P3396379	Unknown
A_33_P3396434	-0.119024	Detected	0.119024	Detected	0	0.0278969	Detected	-0.0796099	Detected	-0.0258565	0.861357	173000	176000	174000	148000	A_33_P3396434	Unknown
A_33_P3396469	0.483775	Detected	-0.483775	Detected	0	-0.859718	Detected	-2.78104	Compromised	-1.82038	0.232638	43.3	19.1	15.5	3.75	A_33_P3396469	Unknown
A_33_P3396477	-0.151849	Compromised	0.151849	Compromised	0	0.235577	Compromised	0.4649	Compromised	0.350238	0.207025	1.7	1.81	2.02	2.17	A_33_P3396477	Unknown
A_33_P3396771	1.0119	Detected	-1.0119	Compromised	2e-07	-0.0359097	Compromised	0.0473528	Compromised	0.00572157	0.996005	8.58	1.82	3.77	3.66	A_33_P3396771	Unknown
A_33_P3397081	-0.146339	Compromised	0.146339	Compromised	-4.8e-07	0.294093	Compromised	0.491867	Compromised	0.39298	0.156044	1.59	1.68	1.96	2.06	A_33_P3397081	Unknown
A_33_P3397209	-0.142398	Compromised	0.142399	Compromised	4.7e-07	0.270069	Compromised	0.416136	Compromised	0.343102	0.165253	1.77	1.86	2.14	2.17	A_33_P3397209	Unknown
A_33_P3397433	-0.0965891	Detected	0.0965891	Detected	0	-0.303011	Detected	-0.983118	Detected	-0.643065	0.210511	36.2	35.7	28.5	16.3	A_33_P3397433	Unknown
A_33_P3397473	-0.160365	Compromised	0.160364	Compromised	-4.8e-07	0.239946	Compromised	0.437268	Compromised	0.338607	0.213935	1.81	1.95	2.17	2.28	A_33_P3397473	Unknown
A_33_P3397506	0.286115	Detected	-0.286115	Detected	0	-0.118422	Detected	0.223357	Detected	0.0524676	0.88936	86.7	50.3	59.5	69.1	A_33_P3397506	Unknown
A_33_P3397573	-0.290093	Compromised	0.290093	Compromised	0	0.120715	Compromised	0.22698	Compromised	0.173847	0.615263	1.83	2.36	2.21	2.18	A_33_P3397573	Unknown
A_33_P3397593	-0.1653	Compromised	0.1653	Compromised	0	1.2268	Compromised	0.445464	Compromised	0.836131	0.187497	1.77	1.92	4.22	2.25	A_33_P3397593	Unknown
A_33_P3397608	-0.15373	Compromised	0.153729	Compromised	-4.8e-07	0.294359	Compromised	0.517018	Compromised	0.405689	0.166029	1.63	1.74	2.02	2.16	A_33_P3397608	Unknown
A_33_P3398187	-0.282773	Compromised	0.282773	Compromised	-4.8e-07	1.01205	Compromised	0.113728	Compromised	0.562889	0.400046	3.76	4.8	8.38	4.12	A_33_P3398187	Unknown
A_33_P3399181	-0.0963902	Detected	0.0963898	Detected	-4.8e-07	-0.249551	Detected	-0.15712	Detected	-0.203335	0.197494	2130	2100	1740	1700	A_33_P3399181	Unknown
A_33_P3399713	-0.122742	Compromised	0.122742	Compromised	-4.76e-07	0.608954	Compromised	0.973449	Compromised	0.791201	0.069213	1.77	1.81	2.67	3.15	A_33_P3399713	Unknown
A_33_P3399778	0.499875	Detected	-0.499875	Compromised	4.7e-07	0.15692	Compromised	-0.273246	Compromised	-0.0581629	0.924638	9.69	4.18	6.94	4.72	A_33_P3399778	Unknown
A_33_P3399911	-0.649814	Compromised	0.649814	Detected	-2e-07	0.659007	Detected	0.0146778	Compromised	0.336843	0.687996	5.51	11.7	12.4	7.27	A_33_P3399911	Unknown
A_33_P3400023	-0.122135	Compromised	0.122136	Compromised	4.8e-07	0.569724	Compromised	0.339991	Compromised	0.454857	0.113253	1.84	1.88	2.7	2.11	A_33_P3400023	Unknown
A_33_P3400292	-0.0613658	Detected	0.0613658	Detected	0	0.725768	Detected	0.260556	Detected	0.493162	0.176864	14.8	13.9	23.2	15.4	A_33_P3400292	Unknown
A_33_P3401068	-0.141439	Compromised	0.141439	Compromised	4.8e-07	0.210471	Compromised	0.38354	Compromised	0.297005	0.215135	1.82	1.91	2.11	2.18	A_33_P3401068	Unknown
A_33_P3401084	-0.186855	Detected	0.186855	Detected	0	-0.0123289	Detected	0.227311	Detected	0.107491	0.676045	1190	1330	1220	1320	A_33_P3401084	Unknown
A_33_P3401138	-0.0548336	Detected	0.0548336	Detected	0	0.0261447	Detected	-0.471798	Detected	-0.222826	0.474265	33.2	30.9	31.9	20.7	A_33_P3401138	Unknown
A_33_P3401146	-0.244628	Compromised	0.244628	Compromised	-4.8e-07	0.162794	Compromised	0.36602	Compromised	0.264407	0.423356	1.66	2.01	2	2.11	A_33_P3401146	Unknown
A_33_P3401179	-0.822937	Compromised	0.822938	Compromised	4.7e-07	-0.0730581	Compromised	-0.220576	Compromised	-0.146817	0.875331	1.63	4.4	2.49	2.06	A_33_P3401179	Unknown
A_33_P3401394	0.0305591	Detected	-0.0305593	Detected	-2.38e-07	0.420058	Detected	-0.914406	Compromised	-0.247174	0.746852	17.9	14.8	21.3	7.74	A_33_P3401394	Unknown
A_33_P3401661	-0.526044	Compromised	0.526045	Detected	4.8e-07	-0.187846	Compromised	-1.13788	Compromised	-0.662863	0.448402	4.92	8.8	5.65	2.68	A_33_P3401661	Unknown
A_33_P3402071	-0.408087	Detected	0.408087	Detected	2.4e-07	-0.0959446	Detected	-0.143498	Detected	-0.119721	0.797209	13.3	20.2	15	13.3	A_33_P3402071	Unknown
A_33_P3402086	0.170311	Compromised	-0.170311	Compromised	0	0.543547	Compromised	-0.591818	Compromised	-0.0241354	0.971217	4.36	2.97	5.13	2.14	A_33_P3402086	Unknown
A_33_P3402294	-0.00942564	Detected	0.00942564	Compromised	0	0.545745	Detected	0.338304	Compromised	0.442024	0.0512818	9.44	8.25	12.6	10	A_33_P3402294	Unknown
A_33_P3402495	0.886969	Detected	-0.886969	Detected	0	-0.271948	Detected	-1.23029	Compromised	-0.751119	0.533891	38.1	9.61	15.5	7.31	A_33_P3402495	Unknown
A_33_P3402600	0.0473886	Detected	-0.0473881	Detected	4.77e-07	-0.127359	Detected	-0.0558243	Detected	-0.0915918	0.262864	6710	5420	5400	5200	A_33_P3402600	Unknown
A_33_P3402773	-0.139566	Detected	0.139566	Detected	0	-0.138801	Detected	-0.668077	Detected	-0.403439	0.309919	42.8	44.8	38.9	24.7	A_33_P3402773	Unknown
A_33_P3403169	-0.150114	Compromised	0.150114	Compromised	0	0.214373	Compromised	0.408421	Compromised	0.311397	0.2236	1.77	1.88	2.07	2.17	A_33_P3403169	Unknown
A_33_P3403242	-0.146098	Compromised	0.146098	Compromised	0	0.270493	Compromised	0.476043	Compromised	0.373268	0.171831	1.6	1.69	1.94	2.05	A_33_P3403242	Unknown
A_33_P3403356	0.192916	Detected	-0.192916	Detected	0	-0.131106	Detected	-0.602453	Detected	-0.36678	0.351664	1130	746	820	542	A_33_P3403356	Unknown
A_33_P3403957	-0.138687	Compromised	0.138687	Compromised	0	0.254732	Compromised	0.40118	Compromised	0.327956	0.171646	1.76	1.84	2.1	2.13	A_33_P3403957	Unknown
A_33_P3404047	0.000254393	Detected	-0.000254393	Detected	0	-0.0641668	Detected	-0.309021	Detected	-0.186594	0.266957	77.7	67	67.5	52.2	A_33_P3404047	Unknown
A_33_P3404116	-0.793421	Compromised	0.793421	Compromised	-4.7e-07	0.0741572	Compromised	1.64021	Compromised	0.857182	0.522315	1.81	4.69	3	8.14	A_33_P3404116	Unknown
A_33_P3404221	0.222563	Detected	-0.222563	Compromised	0	0.155585	Detected	0.369795	Detected	0.26269	0.398956	12.8	8.11	11.1	11.8	A_33_P3404221	Unknown
A_33_P3404241	-0.164361	Compromised	0.164361	Compromised	0	0.254353	Compromised	0.489271	Compromised	0.371812	0.207053	1.68	1.82	2.04	2.2	A_33_P3404241	Unknown
A_33_P3404346	-0.160365	Compromised	0.160364	Compromised	-4.8e-07	0.239946	Compromised	0.779304	Compromised	0.509625	0.24581	1.81	1.95	2.17	2.89	A_33_P3404346	Unknown
A_33_P3404566	0.417993	Detected	-0.417993	Compromised	2.3e-07	0.269159	Detected	-2.03895	Compromised	-0.884897	0.545828	15.5	7.49	12.7	2.35	A_33_P3404566	Unknown
A_33_P3404759	-0.680267	Compromised	0.680268	Detected	4.7e-07	-0.605792	Compromised	-1.38125	Compromised	-0.993519	0.332181	4.14	9.17	3.96	2.12	A_33_P3404759	Unknown
A_33_P3405043	0.0240986	Detected	-0.0240986	Detected	0	-0.314774	Detected	0.0176601	Detected	-0.148557	0.469733	18.1	15.1	13	15	A_33_P3405043	Unknown
A_33_P3405504	-0.259526	Compromised	0.259526	Compromised	-4.7e-07	-0.663573	Compromised	-0.468392	Compromised	-0.565982	0.178	5.04	6.23	3.46	3.63	A_33_P3405504	Unknown
A_33_P3405571	-0.140978	Compromised	0.140978	Compromised	0	0.262127	Compromised	1.46996	Compromised	0.866044	0.297364	1.64	1.72	1.97	4.17	A_33_P3405571	Unknown
A_33_P3405864	-0.160079	Compromised	0.160079	Compromised	0	0.250072	Compromised	0.48499	Compromised	0.367531	0.20537	1.69	1.82	2.04	2.2	A_33_P3405864	Unknown
A_33_P3405870	-0.151849	Compromised	0.151849	Compromised	0	0.422855	Compromised	0.431269	Compromised	0.427062	0.106662	1.7	1.81	2.3	2.12	A_33_P3405870	Unknown
A_33_P3406090	-0.0684915	Detected	0.0684915	Detected	0	-0.150628	Detected	-0.180929	Detected	-0.165779	0.141904	87.4	82.9	75	67.3	A_33_P3406090	Unknown
A_33_P3406110	0.555998	Compromised	-0.555998	Compromised	0	-0.436956	Compromised	-0.17281	Compromised	-0.304883	0.647034	4.36	1.74	1.99	2.19	A_33_P3406110	Unknown
A_33_P3406255	-0.126495	Detected	0.126495	Detected	0	-0.00409985	Detected	-1.01123	Detected	-0.507663	0.431304	179	184	177	80.7	A_33_P3406255	Unknown
A_33_P3406265	0.422825	Compromised	-0.422825	Compromised	0	-0.679301	Compromised	-0.429583	Compromised	-0.554442	0.335484	4.75	2.28	2.01	2.19	A_33_P3406265	Unknown
A_33_P3406405	0.170224	Compromised	-0.170223	Compromised	4.7e-07	-0.0553837	Compromised	0.540085	Compromised	0.242351	0.553021	2.51	1.71	1.95	2.7	A_33_P3406405	Unknown
A_33_P3406413	-0.813054	Compromised	0.813054	Compromised	0	-0.427435	Compromised	-0.028686	Compromised	-0.228061	0.810842	1.66	4.42	1.97	2.38	A_33_P3406413	Unknown
A_33_P3406547	0.355236	Compromised	-0.355237	Compromised	-4.8e-07	-0.628725	Compromised	0.13113	Compromised	-0.248797	0.679598	4.42	2.33	2.03	3.15	A_33_P3406547	Unknown
A_33_P3406702	-0.106622	Detected	0.106622	Detected	-4.8e-07	-0.0104523	Detected	0.209314	Detected	0.099431	0.582692	13800	13800	13400	14300	A_33_P3406702	Unknown
A_33_P3406811	-0.316131	Compromised	0.316131	Compromised	-4.7e-07	0.0841799	Compromised	0.210163	Compromised	0.147172	0.692773	1.81	2.42	2.17	2.17	A_33_P3406811	Unknown
A_33_P3407049	0.243048	Detected	-0.243048	Detected	0	0.321783	Detected	0.044903	Detected	0.183343	0.579483	49.2	30.3	47.2	35.7	A_33_P3407049	Unknown
A_33_P3407230	0.255676	Detected	-0.255676	Detected	0	-0.67664	Detected	-0.391959	Detected	-0.534299	0.209411	27.1	16.4	12.9	14.4	A_33_P3407230	Unknown
A_33_P3407235	0.58518	Compromised	-0.58518	Compromised	0	0.9687	Compromised	0.593077	Compromised	0.780888	0.331671	4.54	1.74	5.38	3.8	A_33_P3407235	Unknown
A_33_P3407374	-0.122652	Detected	0.122653	Detected	9.56e-07	-0.00856876	Detected	-0.170566	Detected	-0.0895672	0.604283	53400	54600	52500	43000	A_33_P3407374	Unknown
A_33_P3407564	-0.17624	Detected	0.17624	Detected	0	-0.26427	Detected	-0.108843	Detected	-0.186557	0.434945	227	250	194	198	A_33_P3407564	Unknown
A_33_P3407623	-0.147387	Compromised	0.147387	Compromised	-4.8e-07	0.201578	Compromised	0.405182	Compromised	0.30338	0.23241	1.72	1.82	1.99	2.1	A_33_P3407623	Unknown
A_33_P3407626	-0.062403	Detected	0.062403	Detected	0	0.181446	Detected	-0.982238	Compromised	-0.400396	0.564474	18.5	17.4	19.9	8.14	A_33_P3407626	Unknown
A_33_P3407691	0.310681	Detected	-0.310681	Detected	0	-0.401191	Compromised	0.314004	Detected	-0.0435932	0.935065	16.3	9.14	9.04	13.6	A_33_P3407691	Unknown
A_33_P3407826	0.176177	Detected	-0.176177	Detected	0	-0.031724	Detected	-0.283262	Detected	-0.157493	0.54252	370	250	291	224	A_33_P3407826	Unknown
A_33_P3407941	0.645127	Compromised	-0.645127	Compromised	5e-07	1.39244	Compromised	-0.25498	Compromised	0.568732	0.641222	4.82	1.7	7.35	2.15	A_33_P3407941	Unknown
A_33_P3407999	0.664325	Compromised	-0.664325	Compromised	0	-0.548441	Compromised	0.688436	Compromised	0.0699971	0.945548	4.95	1.7	1.94	4.19	A_33_P3407999	Unknown
A_33_P3408047	0.759369	Compromised	-0.759369	Compromised	0	-0.647594	Compromised	-0.0320268	Compromised	-0.339811	0.718599	5.78	1.74	1.98	2.78	A_33_P3408047	Unknown
A_33_P3408162	-0.179461	Compromised	0.179461	Compromised	-4.7e-07	0.259268	Compromised	0.518087	Compromised	0.388678	0.221048	1.6	1.77	1.97	2.16	A_33_P3408162	Unknown
A_33_P3408222	-0.327624	Compromised	0.327624	Compromised	0	1.31188	Compromised	0.607075	Compromised	0.959477	0.184316	1.59	2.16	4.5	2.53	A_33_P3408222	Unknown
A_33_P3408227	-0.15879	Compromised	0.158791	Compromised	4.8e-07	0.287244	Compromised	1.29957	Compromised	0.793407	0.273395	1.6	1.72	1.98	3.66	A_33_P3408227	Unknown
A_33_P3408529	-0.729305	Compromised	0.729305	Compromised	0	-0.298248	Compromised	1.51282	Compromised	0.607286	0.653547	1.78	4.22	2.18	7.01	A_33_P3408529	Unknown
A_33_P3408643	-0.235288	Compromised	0.235288	Compromised	4.7e-07	0.139063	Compromised	0.349521	Compromised	0.244292	0.443274	1.69	2.02	1.99	2.11	A_33_P3408643	Unknown
A_33_P3408665	-0.0871244	Detected	0.0871248	Detected	4.75e-07	-0.0446243	Detected	-0.269995	Detected	-0.15731	0.384511	4500	4380	4210	3300	A_33_P3408665	Unknown
A_33_P3408678	0.145127	Compromised	-0.145127	Compromised	4.8e-07	0.000200272	Compromised	0.271614	Compromised	0.135907	0.564587	2.41	1.7	1.98	2.19	A_33_P3408678	Unknown
A_33_P3408683	-0.129166	Compromised	0.129166	Compromised	0	0.292687	Compromised	0.361083	Compromised	0.326885	0.134244	1.89	1.95	2.3	2.21	A_33_P3408683	Unknown
A_33_P3408877	-0.197834	Detected	0.197834	Detected	0	0.0935156	Detected	-0.780501	Detected	-0.343493	0.548277	77.9	88.4	86.6	43.3	A_33_P3408877	Unknown
A_33_P3409249	-0.285173	Detected	0.285173	Detected	0	-0.483926	Detected	-0.575173	Detected	-0.52955	0.208156	23.5	30.1	18.6	16	A_33_P3409249	Unknown
A_33_P3409282	-0.0270228	Detected	0.0270228	Detected	0	0.0089674	Detected	-0.436205	Detected	-0.213619	0.441283	33.5	30	31.2	21	A_33_P3409282	Unknown
A_33_P3409289	-0.180742	Detected	0.180742	Detected	0	-0.162682	Detected	-0.530321	Detected	-0.346501	0.311088	49.9	55.3	45.9	32.6	A_33_P3409289	Unknown
A_33_P3409544	0.370608	Compromised	-0.370607	Compromised	4.7e-07	-0.247516	Compromised	-0.0521584	Compromised	-0.149837	0.73355	3.43	1.77	2.03	2.13	A_33_P3409544	Unknown
A_33_P3409631	0.438605	Compromised	-0.438606	Compromised	-5e-07	0.87178	Compromised	-0.0218649	Compromised	0.424958	0.567323	3.62	1.7	4.44	2.19	A_33_P3409631	Unknown
A_33_P3409815	0.0826337	Detected	-0.0826337	Detected	0	-0.300863	Detected	-0.601145	Detected	-0.451004	0.119136	49.4	38	34.4	25.6	A_33_P3409815	Unknown
A_33_P3410053	-0.141393	Compromised	0.141392	Compromised	-4.8e-07	0.264693	Compromised	0.469847	Compromised	0.36727	0.170241	1.62	1.7	1.95	2.06	A_33_P3410053	Unknown
A_33_P3410166	-0.14833	Compromised	0.14833	Compromised	4.8e-07	0.910841	Compromised	0.976607	Compromised	0.943724	0.0249522	1.68	1.78	3.18	3.05	A_33_P3410166	Unknown
A_33_P3410269	-0.143205	Compromised	0.143205	Compromised	0	0.197397	Compromised	0.401001	Compromised	0.299199	0.230703	1.73	1.82	1.99	2.1	A_33_P3410269	Unknown
A_33_P3410821	-0.132856	Compromised	0.132856	Compromised	0	0.263687	Compromised	0.408695	Compromised	0.336191	0.156458	1.89	1.96	2.26	2.29	A_33_P3410821	Unknown
A_33_P3411122	0.529887	Compromised	-0.529887	Compromised	0	2.05844	Detected	2.093	Compromised	2.07572	0.059476	4.35	1.8	11.4	10.7	A_33_P3411122	Unknown
A_33_P3411384	0.196546	Detected	-0.196546	Detected	0	0.0464304	Detected	-0.416875	Detected	-0.185222	0.604108	204	134	167	111	A_33_P3411384	Unknown
A_33_P3411890	-0.153314	Detected	0.153314	Detected	0	-0.41665	Detected	-0.52957	Detected	-0.47311	0.101432	32.9	35.1	24.9	21.1	A_33_P3411890	Unknown
A_33_P3412317	-0.106622	Compromised	0.106622	Compromised	-4.8e-07	1.42642	Compromised	0.416035	Compromised	0.921229	0.216321	1.94	1.94	5.1	2.32	A_33_P3412317	Unknown
A_33_P3412438	-0.0380223	Detected	0.0380223	Detected	0	0.160207	Detected	-0.810428	Detected	-0.32511	0.572982	47.4	43.1	49.4	23.1	A_33_P3412438	Unknown
A_33_P3412687	-0.272821	Detected	0.272821	Detected	0	0.0207863	Detected	-0.375528	Detected	-0.177371	0.651379	96.1	121	107	74.5	A_33_P3412687	Unknown
A_33_P3412695	-0.381568	Detected	0.381568	Detected	0	-0.405631	Detected	-0.619134	Detected	-0.512382	0.32518	34.7	50.8	31	24.5	A_33_P3412695	Unknown
A_33_P3412795	-0.138687	Compromised	0.138687	Compromised	0	1.08352	Compromised	0.414663	Compromised	0.749091	0.174422	1.76	1.84	3.73	2.15	A_33_P3412795	Unknown
A_33_P3413104	-0.76172	Compromised	0.761719	Compromised	-2.3e-07	1.24275	Detected	1.57518	Detected	1.40897	0.212472	3.21	7.96	11.7	13.5	A_33_P3413104	Unknown
A_33_P3413384	-0.0176387	Detected	0.0176387	Compromised	0	0.627695	Detected	0.349612	Compromised	0.488654	0.0733318	9.22	8.15	13.1	9.9	A_33_P3413384	Unknown
A_33_P3413514	-0.11215	Detected	0.11215	Detected	0	-0.388581	Detected	-0.512376	Detected	-0.450479	0.0722103	26	26.2	19.5	16.4	A_33_P3413514	Unknown
A_33_P3413518	0.828828	Compromised	-0.828828	Compromised	0	1.34776	Compromised	0.786417	Compromised	1.06709	0.34697	6.73	1.84	8.76	5.44	A_33_P3413518	Unknown
A_33_P3413945	0.242646	Compromised	-0.242646	Compromised	-4.8e-07	-0.117444	Compromised	0.10568	Compromised	-0.00588179	0.984429	2.84	1.75	2.01	2.15	A_33_P3413945	Unknown
A_33_P3413997	-0.378071	Detected	0.378071	Detected	0	0.112007	Detected	-0.0407262	Detected	0.0356402	0.934801	11.6	16.9	14.8	12.2	A_33_P3413997	Unknown
A_33_P3414017	0.0365303	Detected	-0.0365303	Detected	0	0.0897009	Detected	-0.788148	Detected	-0.349224	0.510958	400	328	377	188	A_33_P3414017	Unknown
A_33_P3414228	-0.218137	Detected	0.218137	Detected	0	-0.250015	Detected	-0.602438	Detected	-0.426226	0.267883	32.3	37.7	28.7	20.6	A_33_P3414228	Unknown
A_33_P3414472	0.815553	Detected	-0.815553	Compromised	-2e-07	1.46416	Detected	1.18575	Compromised	1.32495	0.250434	9.48	2.64	13.5	10.2	A_33_P3414472	Unknown
A_33_P3414494	-0.154999	Compromised	0.154999	Compromised	0	0.228459	Compromised	0.443146	Compromised	0.335803	0.216854	1.73	1.85	2.05	2.18	A_33_P3414494	Unknown
A_33_P3415047	0.209257	Compromised	-0.209256	Compromised	4.8e-07	-0.0774436	Compromised	0.102479	Compromised	0.0125175	0.961171	2.82	1.82	2.1	2.18	A_33_P3415047	Unknown
A_33_P3415166	-0.830735	Compromised	0.830735	Compromised	0	-0.407515	Compromised	-0.332833	Compromised	-0.370174	0.699755	1.88	5.13	2.29	2.21	A_33_P3415166	Unknown
A_33_P3415617	-0.142924	Detected	0.142924	Detected	0	-0.130695	Detected	0.176457	Detected	0.022881	0.923108	155	163	142	161	A_33_P3415617	Unknown
A_33_P3415826	-0.148818	Compromised	0.148818	Compromised	-4.8e-07	0.2368	Compromised	0.44809	Compromised	0.342445	0.201419	1.66	1.76	1.97	2.09	A_33_P3415826	Unknown
A_33_P3415992	-0.45296	Compromised	0.45296	Compromised	0	-0.103995	Compromised	0.160151	Compromised	0.0280781	0.957957	1.72	2.78	1.99	2.19	A_33_P3415992	Unknown
A_33_P3416196	0.530775	Compromised	-0.530775	Compromised	0	-0.754557	Compromised	1.15201	Compromised	0.198725	0.872266	5.42	2.24	2.02	6.94	A_33_P3416196	Unknown
A_33_P3416644	0.718285	Compromised	-0.718285	Compromised	0	-0.556387	Compromised	-0.335096	Compromised	-0.445741	0.602117	5.46	1.74	2.05	2.19	A_33_P3416644	Unknown
A_33_P3416649	0.526245	Compromised	-0.526245	Compromised	4.6e-07	0.152202	Compromised	-0.182449	Compromised	-0.0151234	0.980638	4.28	1.78	3	2.18	A_33_P3416649	Unknown
A_33_P3416707	-0.0868578	Detected	0.0868578	Detected	0	0.188069	Detected	-0.522167	Detected	-0.167049	0.692548	33.3	32.4	36.6	20.5	A_33_P3416707	Unknown
A_33_P3416807	-0.14809	Compromised	0.14809	Compromised	-4.7e-07	0.211688	Compromised	0.422978	Compromised	0.317333	0.223201	1.69	1.79	1.97	2.09	A_33_P3416807	Unknown
A_33_P3417123	-0.0225217	Detected	0.0225217	Detected	0	-0.12367	Detected	-0.346351	Detected	-0.23501	0.17445	209	186	177	139	A_33_P3417123	Unknown
A_33_P3417464	0.129153	Compromised	-0.129153	Compromised	0	-0.00280428	Compromised	0.679832	Compromised	0.338514	0.451542	2.69	1.94	2.23	3.28	A_33_P3417464	Unknown
A_33_P3417547	-0.261145	Detected	0.261145	Detected	0	0.504548	Detected	0.155447	Detected	0.329997	0.403668	18	22.3	27.8	20	A_33_P3417547	Unknown
A_33_P3417553	-0.0178528	Compromised	0.0178533	Compromised	4.77e-07	0.15081	Compromised	0.356361	Compromised	0.253586	0.135625	1.9	1.68	1.94	2.05	A_33_P3417553	Unknown
A_33_P3418165	-0.147158	Compromised	0.147158	Compromised	4.8e-07	0.271065	Compromised	0.450987	Compromised	0.361026	0.171393	1.73	1.83	2.1	2.18	A_33_P3418165	Unknown
A_33_P3418321	0.10128	Compromised	-0.101281	Compromised	-4.8e-07	0.29186	Compromised	0.356636	Compromised	0.324248	0.0928137	6.27	4.7	6.5	6.23	A_33_P3418321	Unknown
A_33_P3418380	0.0398812	Compromised	-0.0398812	Compromised	0	1.69911	Compromised	1.39167	Compromised	1.54539	0.0103962	3.21	2.62	9.21	6.82	A_33_P3418380	Unknown
A_33_P3418448	-0.177992	Detected	0.177992	Detected	-2.3e-07	-0.159681	Detected	-0.437904	Compromised	-0.298792	0.316934	12.5	13.8	11.5	8.69	A_33_P3418448	Unknown
A_33_P3418466	0.0529668	Detected	-0.0529668	Detected	0	0.0529668	Detected	-0.0835993	Detected	-0.0153162	0.875649	131	105	119	99.2	A_33_P3418466	Unknown
A_33_P3418496	-0.24613	Compromised	0.24613	Compromised	-4.8e-07	-0.677728	Compromised	-0.810381	Compromised	-0.744055	0.100064	3.89	4.72	2.62	2.19	A_33_P3418496	Unknown
A_33_P3418571	-0.148818	Compromised	0.148818	Compromised	-4.8e-07	0.258604	Compromised	0.46183	Compromised	0.360217	0.183642	1.66	1.76	2	2.11	A_33_P3418571	Unknown
A_33_P3419204	0.263347	Compromised	-0.263347	Compromised	0	-0.251397	Compromised	-0.0503635	Compromised	-0.15088	0.646015	3.24	1.94	2.06	2.17	A_33_P3419204	Unknown
A_33_P3419735	0.0147057	Detected	-0.0147057	Detected	0	-0.22923	Detected	-0.258167	Detected	-0.243699	0.00709016	71.7	60.6	55	49.4	A_33_P3419735	Unknown
A_33_P3419875	-0.146266	Compromised	0.146266	Compromised	-4.8e-07	0.266201	Compromised	1.01704	Compromised	0.64162	0.252282	1.77	1.87	2.14	3.3	A_33_P3419875	Unknown
A_33_P3420013	-0.251375	Detected	0.251375	Detected	-2.4e-07	-0.790842	Compromised	-0.718752	Compromised	-0.754797	0.0970037	14.4	17.6	9	8.67	A_33_P3420013	Unknown
A_33_P3420347	-0.226499	Compromised	0.226499	Compromised	0	0.327144	Compromised	0.620333	Compromised	0.473739	0.22119	1.77	2.09	2.36	2.65	A_33_P3420347	Unknown
A_33_P3420695	-0.117552	Detected	0.117552	Detected	0	-0.372847	Detected	-0.913693	Detected	-0.64327	0.16089	131	133	99.7	62.8	A_33_P3420695	Unknown
A_33_P3420810	-0.279387	Compromised	0.279387	Compromised	0	0.259305	Compromised	-0.893612	Compromised	-0.317153	0.66958	3.88	4.93	5.12	2.11	A_33_P3420810	Unknown
A_33_P3421007	-0.319552	Compromised	0.319552	Compromised	4.8e-07	0.0950661	Compromised	0.846122	Compromised	0.470594	0.440612	1.66	2.23	2.01	3.1	A_33_P3421007	Unknown
A_33_P3421144	-0.128028	Compromised	0.128029	Compromised	4.7e-07	0.25759	Compromised	0.516409	Compromised	0.386999	0.167397	1.66	1.71	1.97	2.16	A_33_P3421144	Unknown
A_33_P3421438	-0.202659	Compromised	0.202659	Compromised	0	0.530011	Compromised	0.201093	Compromised	0.365552	0.296317	3.16	3.61	4.77	3.48	A_33_P3421438	Unknown
A_33_P3421515	0.0733104	Detected	-0.0733099	Detected	4.75e-07	-0.0767479	Detected	0.0903273	Detected	0.00678968	0.956845	7610	5930	6230	6410	A_33_P3421515	Unknown
A_33_P3421674	-0.623705	Compromised	0.623705	Compromised	2.5e-07	-1.12288	Compromised	-0.839523	Compromised	-0.981201	0.264748	4.59	9.4	2.95	3.29	A_33_P3421674	Unknown
A_33_P3421808	-0.146707	Compromised	0.146708	Compromised	4.7e-07	0.198899	Compromised	0.394591	Compromised	0.296745	0.234449	1.75	1.85	2.02	2.12	A_33_P3421808	Unknown
A_33_P3422294	-0.134459	Detected	0.134459	Detected	-4.8e-07	-0.150487	Detected	-0.321636	Detected	-0.236062	0.276747	3050	3170	2740	2230	A_33_P3422294	Unknown
A_33_P3422712	-0.342067	Detected	0.342067	Detected	0	-0.228997	Detected	-0.252157	Detected	-0.240577	0.554918	1140	1580	1120	1010	A_33_P3422712	Unknown
A_33_P3423017	-0.397	Detected	0.397	Detected	2.3e-07	-0.0207825	Detected	-0.210064	Compromised	-0.115423	0.803903	9.16	13.7	10.8	8.68	A_33_P3423017	Unknown
A_33_P3423202	0.287199	Detected	-0.287199	Detected	2.4e-07	-0.220187	Compromised	-1.87181	Compromised	-1.046	0.354151	16.9	9.79	10.8	3.15	A_33_P3423202	Unknown
A_33_P3423210	-0.143834	Compromised	0.143835	Compromised	4.8e-07	0.264861	Compromised	0.459557	Compromised	0.362209	0.172351	1.7	1.79	2.05	2.15	A_33_P3423210	Unknown
A_33_P3423315	-0.156969	Compromised	0.156969	Compromised	0	0.998915	Compromised	1.1206	Compromised	1.05976	0.0243182	1.66	1.78	3.36	3.35	A_33_P3423315	Unknown
A_33_P3423565	-0.147853	Compromised	0.147853	Compromised	0	0.210718	Compromised	0.414704	Compromised	0.312711	0.223816	1.7	1.8	1.98	2.09	A_33_P3423565	Unknown
A_33_P3423845	-0.287907	Detected	0.287907	Detected	0	-0.0862911	Detected	-0.841988	Detected	-0.464139	0.431581	112	144	117	63.5	A_33_P3423845	Unknown
A_33_P3424108	0.111428	Detected	-0.111428	Compromised	0	-1.47652	Compromised	-0.884511	Compromised	-1.18051	0.0648732	9.2	6.8	2.78	3.84	A_33_P3424108	Unknown
A_33_P3424347	-0.00632477	Detected	0.00632477	Detected	0	-0.692871	Detected	-0.196148	Detected	-0.444509	0.215479	104	90.5	58.7	75.9	A_33_P3424347	Unknown
A_33_P3424826	0.319933	Detected	-0.319933	Compromised	0	-1.18776	Compromised	-0.323871	Compromised	-0.755815	0.29493	9.61	5.32	3.07	5.12	A_33_P3424826	Unknown
A_33_P3424856	-0.147619	Compromised	0.147618	Compromised	-4.7e-07	0.202491	Compromised	0.48702	Compromised	0.344755	0.234665	1.71	1.81	1.98	2.21	A_33_P3424856	Unknown
A_33_P3438201	0.0534878	Detected	-0.0534878	Detected	0	-0.290601	Detected	0.0316057	Detected	-0.129498	0.525239	21.1	16.9	15.1	17.3	A_33_P3438201	Unknown
A_33_P3444555	0.00608802	Detected	-0.00608802	Detected	0	-0.481689	Detected	-0.677634	Compromised	-0.579661	0.0274997	15.9	13.6	10.3	8.24	A_33_P3444555	Unknown
A_33_P3465440	-0.159107	Compromised	0.159107	Compromised	0	0.380861	Compromised	0.567386	Compromised	0.474124	0.123823	1.59	1.71	2.1	2.19	A_33_P3465440	Unknown
A_33_P3479066	-0.257055	Detected	0.257055	Detected	0	-0.332156	Detected	-0.557185	Compromised	-0.444671	0.253898	13.8	17	11.9	9.33	A_33_P3479066	Unknown
A_33_P3484775	0.55357	Compromised	-0.55357	Compromised	0	-0.433636	Compromised	-0.307652	Compromised	-0.370644	0.574336	4.67	1.87	2.14	2.14	A_33_P3484775	Unknown
A_33_P3486059	0.279027	Compromised	-0.279027	Compromised	0	-0.209996	Compromised	-0.0369272	Compromised	-0.123461	0.713678	3.26	1.91	2.11	2.18	A_33_P3486059	Unknown
A_33_P3503279	0.243598	Detected	-0.243598	Detected	0	-0.619505	Compromised	-2.38807	Compromised	-1.50379	0.242784	16.9	10.4	8.44	2.27	A_33_P3503279	Unknown
A_33_P3509019	-0.152637	Compromised	0.152637	Compromised	0	0.288765	Compromised	0.496432	Compromised	0.392599	0.167304	1.67	1.78	2.06	2.18	A_33_P3509019	Unknown
A_33_P3510508	-0.149829	Compromised	0.149829	Compromised	0	0.263636	Compromised	0.888651	Compromised	0.576144	0.238322	1.62	1.72	1.96	2.77	A_33_P3510508	Unknown
A_33_P3519223	-0.0412288	Compromised	0.0412288	Compromised	0	0.306518	Compromised	-0.190395	Compromised	0.0580615	0.83911	7.5	6.85	8.67	5.63	A_33_P3519223	Unknown
A_33_P3521965	-0.14539	Compromised	0.145391	Compromised	4.8e-07	0.273844	Compromised	0.545258	Compromised	0.409551	0.175674	1.63	1.72	1.98	2.19	A_33_P3521965	Unknown
A_33_P3538688	-0.118351	Compromised	0.118351	Compromised	0	0.252747	Compromised	0.344783	Compromised	0.298765	0.142915	1.83	1.86	2.15	2.1	A_33_P3538688	Unknown
A_33_P3615955	-0.12045	Compromised	0.12045	Compromised	0	-0.0163827	Compromised	-0.942161	Compromised	-0.479272	0.421872	4.65	4.74	4.54	2.19	A_33_P3615955	Unknown
A_33_P3642217	-0.142502	Compromised	0.142501	Compromised	-4.8e-07	0.611662	Compromised	1.14273	Compromised	0.877197	0.100538	4.51	4.74	6.91	9.15	A_33_P3642217	Unknown
A_33_P3673310	-0.0651329	Compromised	0.0651331	Compromised	2.35e-07	-0.193423	Compromised	-0.382005	Compromised	-0.287714	0.128721	8.23	7.77	6.84	5.5	A_33_P3673310	Unknown
A_33_P3673544	-0.151089	Compromised	0.151089	Compromised	4.8e-07	0.280809	Compromised	1.79001	Compromised	1.03541	0.310733	1.73	1.84	2.12	5.53	A_33_P3673544	Unknown
A_33_P3701139	-0.140179	Detected	0.140179	Detected	-4.8e-07	-0.34078	Detected	-0.0584545	Detected	-0.199617	0.421342	2100	2200	1660	1850	A_33_P3701139	Unknown
A_33_P3723827	-0.15879	Compromised	0.158791	Compromised	4.8e-07	0.287244	Compromised	0.552055	Compromised	0.419649	0.179516	1.6	1.72	1.98	2.18	A_33_P3723827	Unknown
A_33_P3733123	-0.241566	Compromised	0.241566	Compromised	-4.8e-07	0.173749	Compromised	2.0106	Compromised	1.09218	0.369071	1.75	2.11	2.12	6.94	A_33_P3733123	Unknown
A_33_P3744376	-0.146098	Compromised	0.146098	Compromised	0	0.27791	Compromised	0.49005	Compromised	0.38398	0.167288	1.6	1.69	1.95	2.07	A_33_P3744376	Unknown
A_33_P3751193	0.904953	Compromised	-0.904953	Compromised	-5e-07	0.636157	Compromised	-0.53508	Compromised	0.0505385	0.966865	6.91	1.7	5.21	2.12	A_33_P3751193	Unknown
A_33_P3765291	-0.154011	Compromised	0.154011	Compromised	4.8e-07	0.288601	Compromised	0.525616	Compromised	0.407108	0.171173	1.62	1.73	2	2.16	A_33_P3765291	Unknown
A_33_P3806704	-0.121729	Compromised	0.121729	Compromised	0	0.281183	Compromised	0.335505	Compromised	0.308344	0.131985	1.89	1.93	2.27	2.16	A_33_P3806704	Unknown
A_33_P3809328	0.904145	Detected	-0.904145	Detected	2.6e-07	0.60618	Detected	-3.2132	Compromised	-1.30351	0.600156	54	13.3	39.9	2.59	A_33_P3809328	Unknown
A_33_P3815935	0.594033	Compromised	-0.594033	Compromised	0	-0.668672	Compromised	0.0758829	Compromised	-0.296394	0.713569	5.23	1.98	1.98	3.04	A_33_P3815935	Unknown
A_33_P3855484	-0.999011	Compromised	0.999011	Compromised	0	1.09177	Compromised	-0.536885	Compromised	0.277441	0.84952	1.84	6.34	7.12	2.11	A_33_P3855484	Unknown
A1BG	-0.140494	Detected	0.140494	Detected	0	-0.0979607	Detected	-0.141717	Detected	-0.119839	0.488054	1040	1090	973	865	NM_130786	ref|Homo sapiens alpha-1-B glycoprotein (A1BG), mRNA [NM_130786]	alpha-1-B glycoprotein	ref|NM_130786|ens|ENST00000598345|ens|ENST00000595014|ens|ENST00000263100	GO:0008150|GO:0003674|GO:0072562|GO:0005576|GO:0005615|GO:0070062	GO:0003674=molecular_function	GO:0005615=extracellular space|GO:0070062=extracellular exosome|GO:0072562=blood microparticle|GO:0005576=extracellular region	GO:0008150=biological_process	THC2461029	ENST00000598345	Hs.529161	1
A1BG-AS1	-0.012044	Detected	0.012044	Detected	0	0.174655	Detected	-0.263776	Detected	-0.0445602	0.857938	236	207	244	165	AK027222	gb|Homo sapiens cDNA: FLJ23569 fis, clone LNG11861. [AK027222]	A1BG antisense RNA 1	gb|AK027222|gb|BC006144|gb|BC040926|tc|NP1154677					NP1154677		Hs.709582	503538
A1CF	0.387773	Compromised	-0.387773	Compromised	0	0.0539475	Compromised	-0.910267	Compromised	-0.42816	0.560465	6.41	3.23	4.62	2.17	NM_138933	ref|Homo sapiens APOBEC1 complementation factor (A1CF), transcript variant 3, mRNA [NM_138933]	APOBEC1 complementation factor	ref|NM_138933|ref|NM_001198819|ref|NM_001198820|ref|NM_001198818	GO:0003725|GO:0005515|GO:0006397|GO:0030895|GO:0010467|GO:0003727|GO:0005783|GO:0016556|GO:0003723|GO:0016554|GO:0050821|GO:0005737|GO:0000166|GO:0005654	GO:0000166=nucleotide binding|GO:0005515=protein binding|GO:0003723=RNA binding|GO:0003725=double-stranded RNA binding|GO:0003727=single-stranded RNA binding	GO:0005783=endoplasmic reticulum|GO:0005654=nucleoplasm|GO:0005737=cytoplasm|GO:0030895=apolipoprotein B mRNA editing enzyme complex	GO:0006397=mRNA processing|GO:0010467=gene expression|GO:0050821=protein stabilization|GO:0016554=cytidine to uridine editing|GO:0016556=mRNA modification	NP220852	ENST00000373995	Hs.282795	29974
A25969	-0.141627	Compromised	0.141627	Compromised	4.8e-07	2.73792	Detected	0.384667	Compromised	1.5613	0.318379	1.81	1.9	12.1	2.17	A25969	gb|H.sapiens mRNA for T-cell receptor IGR b 18 Vbeta 7. [A25969]		gb|A25969|gb|X58812|gb|X57616|gb|X57618
A2M	0.0114963	Detected	-0.0114963	Detected	0	0.529988	Detected	0.965913	Detected	0.747951	0.0756243	48.3162	41.0184	62.871	77.9385	NM_000014	ref|Homo sapiens alpha-2-macroglobulin (A2M), mRNA [NM_000014]	alpha-2-macroglobulin	ref|NM_000014|ens|ENST00000318602|ens|ENST00000495709|ens|ENST00000495442	GO:0005515|GO:0007264|GO:0004867|GO:0072562|GO:0002020|GO:0019959|GO:0005829|GO:0019966|GO:0019838|GO:0022617|GO:0030198|GO:0031093|GO:0070062|GO:0001869|GO:0051056|GO:0043120|GO:0005102|GO:0030168|GO:0005576|GO:0010951|GO:0048863|GO:0007596|GO:0007597|GO:0002576|GO:0019899|GO:0048306	GO:0019959=interleukin-8 binding|GO:0019838=growth factor binding|GO:0002020=protease binding|GO:0019966=interleukin-1 binding|GO:0048306=calcium-dependent protein binding|GO:0005102=receptor binding|GO:0004867=serine-type endopeptidase inhibitor activity|GO:0005515=protein binding|GO:0043120=tumor necrosis factor binding|GO:0019899=enzyme binding	GO:0005576=extracellular region|GO:0070062=extracellular exosome|GO:0072562=blood microparticle|GO:0005829=cytosol|GO:0031093=platelet alpha granule lumen	GO:0007597=blood coagulation, intrinsic pathway|GO:0007596=blood coagulation|GO:0002576=platelet degranulation|GO:0048863=stem cell differentiation|GO:0001869=negative regulation of complement activation, lectin pathway|GO:0010951=negative regulation of endopeptidase activity|GO:0030168=platelet activation|GO:0007264=small GTPase mediated signal transduction|GO:0022617=extracellular matrix disass…	NP1159902	ENST00000318602	Hs.212838	2
A2M-AS1	0.0258675	Detected	-0.0258675	Detected	0	0.0742545	Detected	-0.100945	Detected	-0.013345	0.897236	85.1998	70.9042	80.035	64.9554	NR_026971	ref|Homo sapiens A2M antisense RNA 1 (head to head) (A2M-AS1), long non-coding RNA [NR_026971]	A2M antisense RNA 1 (head to head)	ref|NR_026971|linc|lnc-KLRG1-1:1|gb|AK056852|gb|AK096375					THC2505447		Hs.592432	144571
A2ML1	0.324025	Compromised	-0.324025	Compromised	4.7e-07	-0.865931	Compromised	1.57532	Detected	0.354693	0.805209	5.45	3	2.17	10.8	NM_144670	ref|Homo sapiens alpha-2-macroglobulin-like 1 (A2ML1), transcript variant 1, mRNA [NM_144670]	alpha-2-macroglobulin-like 1	ref|NM_144670|ref|NM_001282424|ens|ENST00000541459|ens|ENST00000537475	GO:0010951|GO:0004867|GO:0030414|GO:0005615|GO:0052548|GO:0070062	GO:0030414=peptidase inhibitor activity|GO:0004867=serine-type endopeptidase inhibitor activity	GO:0005615=extracellular space|GO:0070062=extracellular exosome	GO:0010951=negative regulation of endopeptidase activity|GO:0052548=regulation of endopeptidase activity	NP1162821	ENST00000541459	Hs.620532	144568
A2MP1	0.102557	Detected	-0.102557	Detected	-2.4e-07	0.337378	Detected	-1.50299	Compromised	-0.582807	0.593364	11.6	8.68	12.4	3.17315	NR_040112	ref|Homo sapiens alpha-2-macroglobulin pseudogene 1 (A2MP1), non-coding RNA [NR_040112]	alpha-2-macroglobulin pseudogene 1	ref|NR_040112|ens|ENST00000543404|linc|lnc-PZP-1:1|tc|THC2644733						ENST00000566278	Hs.569125	3
A3GALT2	-0.146339	Compromised	0.146339	Compromised	-4.8e-07	0.286714	Compromised	0.759563	Compromised	0.523138	0.200637	1.59	1.68	1.95	2.48	NM_001080438	ref|Homo sapiens alpha 1,3-galactosyltransferase 2 (A3GALT2), mRNA [NM_001080438]	alpha 1,3-galactosyltransferase 2	ref|NM_001080438|ens|ENST00000442999|tc|NP1250934					NP1250934	ENST00000442999		127550
A4GALT	0.0159345	Detected	-0.015934	Detected	4.77e-07	-0.151973	Detected	-0.188095	Detected	-0.170034	0.0194804	2560	2160	2070	1850	NM_017436	ref|Homo sapiens alpha 1,4-galactosyltransferase (A4GALT), mRNA [NM_017436]	alpha 1,4-galactosyltransferase	ref|NM_017436|ens|ENST00000381278|ens|ENST00000401850|ens|ENST00000249005	GO:0007009|GO:0030173|GO:0050512|GO:0016020|GO:0001576|GO:0015643|GO:0006688|GO:0006486|GO:0008378|GO:0070062	GO:0015643=toxic substance binding|GO:0008378=galactosyltransferase activity|GO:0050512=lactosylceramide 4-alpha-galactosyltransferase activity	GO:0070062=extracellular exosome|GO:0030173=integral component of Golgi membrane|GO:0016020=membrane	GO:0001576=globoside biosynthetic process|GO:0007009=plasma membrane organization|GO:0006486=protein glycosylation|GO:0006688=glycosphingolipid biosynthetic process	THC2462020	ENST00000381278	Hs.105956	53947
A4GNT	-0.14516	Compromised	0.14516	Compromised	4.8e-07	0.250604	Compromised	0.448378	Compromised	0.349491	0.1849	1.64	1.73	1.96	2.06	NM_016161	ref|Homo sapiens alpha-1,4-N-acetylglucosaminyltransferase (A4GNT), mRNA [NM_016161]	alpha-1,4-N-acetylglucosaminyltransferase	ref|NM_016161|ens|ENST00000236709|gb|BC119640|gb|BC119639	GO:0008375|GO:0009101|GO:0016020|GO:0006493|GO:0000139|GO:0005975|GO:0050680|GO:0016021	GO:0008375=acetylglucosaminyltransferase activity	GO:0016020=membrane|GO:0016021=integral component of membrane|GO:0000139=Golgi membrane	GO:0005975=carbohydrate metabolic process|GO:0009101=glycoprotein biosynthetic process|GO:0006493=protein O-linked glycosylation|GO:0050680=negative regulation of epithelial cell proliferation	THC2485728	ENST00000236709	Hs.278960	51146
AA06	-0.157863	Compromised	0.157864	Compromised	4.8e-07	0.268639	Compromised	0.532784	Compromised	0.400712	0.190932	1.63	1.75	1.99	2.19	NR_037584	ref|Homo sapiens uncharacterized LOC100506677 (AA06), non-coding RNA [NR_037584]	uncharacterized LOC100506677	ref|NR_037584|linc|lnc-MYO1D-3:1|gb|AF381172|gb|AF381173					THC2616013		Hs.652571	100506677
AA489744	-0.142009	Compromised	0.142008	Compromised	-4.8e-07	0.307197	Compromised	0.426667	Compromised	0.366932	0.140154	1.79	1.88	2.22	2.21	AA489744	gb|aa43c10.r1 Soares_NhHMPu_S1 Homo sapiens cDNA clone IMAGE:823698 5', mRNA sequence [AA489744]		gb|AA489744
AA496144	-0.869969	Compromised	0.869969	Compromised	0	0.527909	Compromised	-0.247828	Compromised	0.14004	0.896598	1.6	4.61	3.83	2.05	AA496144	gb|zv51g10.r1 Soares_testis_NHT Homo sapiens cDNA clone IMAGE:757218 5', mRNA sequence [AA496144]		gb|AA496144|tc|THC2667977
AA504818	-0.11366	Detected	0.11366	Detected	0	-0.127057	Detected	0.12236	Detected	-0.00234866	0.990158	1020	1030	918	1000	AA504818	gb|aa64c04.s1 NCI_CGAP_GCB1 Homo sapiens cDNA clone IMAGE:825702 3' similar to contains Alu repetitive element;contains element TAR1 repetitive element ;, mRNA sequence [AA504818]		gb|AA504818|tc|THC2630254|tc|THC2473967
AA593742	-0.372016	Compromised	0.372015	Compromised	-4.7e-07	0.187817	Compromised	0.0971317	Compromised	0.142474	0.740398	4.07	5.88	5.45	4.69	AA593742	gb|nl83g08.s1 NCI_CGAP_Br2 Homo sapiens cDNA clone IMAGE:1057310 3' similar to contains L1.t2 L1 repetitive element ;, mRNA sequence [AA593742]		gb|AA593742|tc|THC2723561
AA682772	0.33438	Compromised	-0.334379	Compromised	4.7e-07	0.452345	Compromised	-0.0531082	Compromised	0.199619	0.680849	3.52	1.91	3.47	2.24	AA682772	gb|ah52h03.s1 Soares_testis_NHT Homo sapiens cDNA clone 1293173 3', mRNA sequence [AA682772]		gb|AA682772
AA778499	-0.161434	Detected	0.161434	Detected	0	0.0269246	Detected	-0.233081	Detected	-0.103078	0.668263	114	123	118	90.3	AA778499	gb|af85e03.s1 Soares_testis_NHT Homo sapiens cDNA clone 1048828 3', mRNA sequence [AA778499]		gb|AA778499
AAAS	-0.0743177	Detected	0.0743177	Detected	0	-0.0113757	Detected	-0.235336	Detected	-0.123356	0.455594	1370	1310	1300	1020	NM_015665	ref|Homo sapiens achalasia, adrenocortical insufficiency, alacrimia (AAAS), transcript variant 1, mRNA [NM_015665]	achalasia, adrenocortical insufficiency, alacrimia	ref|NM_015665|ref|NM_001173466|ens|ENST00000552876|ens|ENST00000209873	GO:0007077|GO:0010467|GO:0019221|GO:0019058|GO:0005634|GO:0044281|GO:0005635|GO:0015031|GO:0008645|GO:0003674|GO:0005737|GO:0015758|GO:0005643|GO:0016032|GO:0007612|GO:0046822|GO:0005813|GO:0031965|GO:0005975|GO:0019083|GO:0055085|GO:0010827|GO:0006913|GO:0009566|GO:0016020|GO:0009405|GO:0005654|GO:0051028|GO:0000278	GO:0003674=molecular_function	GO:0005654=nucleoplasm|GO:0005643=nuclear pore|GO:0005635=nuclear envelope|GO:0005634=nucleus|GO:0005813=centrosome|GO:0031965=nuclear membrane|GO:0005737=cytoplasm|GO:0016020=membrane	GO:0007077=mitotic nuclear envelope disassembly|GO:0015031=protein transport|GO:0007612=learning|GO:0008645=hexose transport|GO:0000278=mitotic cell cycle|GO:0044281=small molecule metabolic process|GO:0019083=viral transcription|GO:0006913=nucleocytoplasmic transport|GO:0019221=cytokine-mediated signaling pathway|GO:0016032=viral process|GO:0051028=mRNA transport|GO:0055085=transmembrane transpo…	THC2533646	ENST00000552876	Hs.369144	8086
AACS	0.035464	Detected	-0.035464	Detected	0	-0.0480125	Detected	-0.807028	Detected	-0.42752	0.378602	603.523	495.621	517.417	280.175	NM_023928	ref|Homo sapiens acetoacetyl-CoA synthetase (AACS), mRNA [NM_023928]	acetoacetyl-CoA synthetase	ref|NM_023928|ens|ENST00000538851|ens|ENST00000536118|ens|ENST00000543665	GO:0007584|GO:0042493|GO:0045471|GO:0034201|GO:0005524|GO:0014074|GO:0047760|GO:0005829|GO:0001889|GO:0071397|GO:0042594|GO:0071394|GO:0050872|GO:0006631|GO:0032024|GO:0071333|GO:0060612|GO:0030729	GO:0005524=ATP binding|GO:0030729=acetoacetate-CoA ligase activity|GO:0047760=butyrate-CoA ligase activity	GO:0005829=cytosol	GO:0014074=response to purine-containing compound|GO:0042594=response to starvation|GO:0007584=response to nutrient|GO:0006631=fatty acid metabolic process|GO:0060612=adipose tissue development|GO:0071394=cellular response to testosterone stimulus|GO:0050872=white fat cell differentiation|GO:0045471=response to ethanol|GO:0071333=cellular response to glucose stimulus|GO:0042493=response to drug|G…	NP1467485	ENST00000316543	Hs.656073	65985
AACSP1	0.114231	Detected	-0.114231	Detected	0	0.128746	Detected	-0.198238	Detected	-0.0347458	0.877737	18.2	13.4	16.7	12.2	NR_024035	ref|Homo sapiens acetoacetyl-CoA synthetase pseudogene 1 (AACSP1), non-coding RNA [NR_024035]	acetoacetyl-CoA synthetase pseudogene 1	ref|NR_024035|ens|ENST00000521412|ens|ENST00000503486|linc|TCONS_l2_00023283					THC2631045	ENST00000521412	Hs.382790	729522
AADAC	-0.196204	Compromised	0.196205	Compromised	4.7e-07	0.0436888	Compromised	0.199237	Compromised	0.121463	0.623076	2.01355	2.2798	2.16	2.20472	NM_001086	ref|Homo sapiens arylacetamide deacetylase (AADAC), mRNA [NM_001086]	arylacetamide deacetylase	ref|NM_001086|ens|ENST00000232892|ref|XM_005247103|ref|XM_005247104	GO:0004806|GO:0008152|GO:0019213|GO:0005789|GO:0010898|GO:0017171|GO:0016021|GO:0003824|GO:0016298	GO:0017171=serine hydrolase activity|GO:0003824=catalytic activity|GO:0004806=triglyceride lipase activity|GO:0016298=lipase activity|GO:0019213=deacetylase activity	GO:0005789=endoplasmic reticulum membrane|GO:0016021=integral component of membrane	GO:0008152=metabolic process|GO:0010898=positive regulation of triglyceride catabolic process	THC2472269	ENST00000232892	Hs.506908	13
AADACL2	-0.159107	Compromised	0.159107	Compromised	0	0.30324	Compromised	0.567386	Compromised	0.435313	0.169911	1.59	1.71	1.99	2.19	NM_207365	ref|Homo sapiens arylacetamide deacetylase-like 2 (AADACL2), mRNA [NM_207365]	arylacetamide deacetylase-like 2	ref|NM_207365|ens|ENST00000356517|ens|ENST00000570799|gb|BC065724	GO:0052689|GO:0008152|GO:0005576|GO:0016021	GO:0052689=carboxylic ester hydrolase activity	GO:0016021=integral component of membrane|GO:0005576=extracellular region	GO:0008152=metabolic process	THC2480355	ENST00000356517	Hs.144710	344752
AADACL2-AS1	-0.263283	Compromised	0.263284	Compromised	2.5e-07	-0.74391	Compromised	-1.59727	Compromised	-1.17059	0.144672	6.39	7.94	4.16	2.11	NR_110203	ref|Homo sapiens AADACL2 antisense RNA 1 (AADACL2-AS1), transcript variant 2, long non-coding RNA [NR_110203]	AADACL2 antisense RNA 1	ref|NR_110203|ref|NR_110202|linc|lnc-IGSF10-2:1|linc|lnc-IGSF10-2:2					THC2645463		Hs.680207	101928142
AADACL3	-0.0222623	Detected	0.0222623	Detected	0	0.140269	Detected	-0.597971	Detected	-0.228851	0.599101	29.9	26.6	30.4	16.7	NM_001103170	ref|Homo sapiens arylacetamide deacetylase-like 3 (AADACL3), transcript variant 1, mRNA [NM_001103170]	arylacetamide deacetylase-like 3	ref|NM_001103170|ref|NR_111984|ens|ENST00000620146|gb|AK127828	GO:0016787|GO:0008152	GO:0016787=hydrolase activity		GO:0008152=metabolic process	THC2604262	ENST00000359318	Hs.464705	126767
AADACL4	-0.134294	Compromised	0.134294	Compromised	0	0.255206	Compromised	1.27219	Compromised	0.763697	0.283609	1.79	1.86	2.13	3.95	NM_001013630	ref|Homo sapiens arylacetamide deacetylase-like 4 (AADACL4), mRNA [NM_001013630]	arylacetamide deacetylase-like 4	ref|NM_001013630|ens|ENST00000376221|ref|XM_006710608|tc|THC2661558	GO:0052689|GO:0008152|GO:0016021	GO:0052689=carboxylic ester hydrolase activity	GO:0016021=integral component of membrane	GO:0008152=metabolic process	THC2661558	ENST00000376221	Hs.209954	343066
AADACP1	-0.292607	Detected	0.292607	Detected	0	-0.00199771	Detected	-0.331209	Detected	-0.166603	0.668895	15.3	19.8	17	12.4	NR_026915	ref|Homo sapiens arylacetamide deacetylase pseudogene 1 (AADACP1), non-coding RNA [NR_026915]	arylacetamide deacetylase pseudogene 1	ref|NR_026915|ens|ENST00000483636|linc|lnc-AADACL2-1:2|linc|TCONS_l2_00018935					THC2608394	ENST00000483636	Hs.383050	201651
AADAT	0.0530331	Detected	-0.0530331	Detected	0	-0.199151	Detected	0.473115	Detected	0.136982	0.726233	413	331	315	460	NM_016228	ref|Homo sapiens aminoadipate aminotransferase (AADAT), transcript variant 1, mRNA [NM_016228]	aminoadipate aminotransferase	ref|NM_016228|ref|NM_001286683|ref|NM_001286682|ref|NM_182662	GO:0070189|GO:0006569|GO:0006536|GO:0009058|GO:0033512|GO:0047536|GO:0044281|GO:0042803|GO:0034641|GO:0097052|GO:0019441|GO:0005759|GO:0006103|GO:0030170|GO:0016212|GO:0006554	GO:0030170=pyridoxal phosphate binding|GO:0042803=protein homodimerization activity|GO:0047536=2-aminoadipate transaminase activity|GO:0016212=kynurenine-oxoglutarate transaminase activity	GO:0005759=mitochondrial matrix	GO:0009058=biosynthetic process|GO:0097052=L-kynurenine metabolic process|GO:0006103=2-oxoglutarate metabolic process|GO:0006554=lysine catabolic process|GO:0044281=small molecule metabolic process|GO:0006569=tryptophan catabolic process|GO:0006536=glutamate metabolic process|GO:0070189=kynurenine metabolic process|GO:0019441=tryptophan catabolic process to kynurenine|GO:0034641=cellular nitrogen…	THC2488049	ENST00000353187	Hs.529735	51166
AAED1	0.0882633	Detected	-0.0882633	Detected	0	0.0247252	Detected	-0.0775607	Detected	-0.0264177	0.819874	283	216	246	210	NM_153698	ref|Homo sapiens AhpC/TSA antioxidant enzyme domain containing 1 (AAED1), mRNA [NM_153698]	AhpC/TSA antioxidant enzyme domain containing 1	ref|NM_153698|ref|XM_005251783|ref|XM_005251784|gb|BC136503					THC2498207	ENST00000375234	Hs.44640	195827
AAGAB	0.0152831	Detected	-0.0152826	Detected	4.77e-07	-0.135781	Detected	0.130148	Detected	-0.00281668	0.985119	9840	8310	8050	8870	NM_024666	ref|Homo sapiens alpha- and gamma-adaptin binding protein (AAGAB), transcript variant 1, mRNA [NM_024666]	alpha- and gamma-adaptin binding protein	ref|NM_024666|ref|NM_001271886|ref|NM_001271885|ens|ENST00000538028	GO:0005737|GO:0005654|GO:0015031|GO:0005829		GO:0005737=cytoplasm|GO:0005829=cytosol|GO:0005654=nucleoplasm	GO:0015031=protein transport	THC2601734	ENST00000538028	Hs.254642	79719
AAK1	0.122875	Detected	-0.122875	Detected	0	0.0155878	Detected	0.0902834	Detected	0.0529356	0.720181	126.931	92.3411	107.04	103.301	NM_014911	ref|Homo sapiens AP2 associated kinase 1 (AAK1), mRNA [NM_014911]	AP2 associated kinase 1	ref|NM_014911|ens|ENST00000409085|ens|ENST00000339092|tc|THC2684828	GO:0045747|GO:0005515|GO:0035612|GO:0030136|GO:0050821|GO:0005112|GO:0005524|GO:0006897|GO:0032880|GO:0005905|GO:0046777|GO:0004674|GO:0043195|GO:2000369|GO:0006468|GO:0031252|GO:0019897	GO:0005112=Notch binding|GO:0004674=protein serine/threonine kinase activity|GO:0005524=ATP binding|GO:0005515=protein binding|GO:0035612=AP-2 adaptor complex binding	GO:0031252=cell leading edge|GO:0043195=terminal bouton|GO:0005905=coated pit|GO:0030136=clathrin-coated vesicle|GO:0019897=extrinsic component of plasma membrane	GO:0032880=regulation of protein localization|GO:0046777=protein autophosphorylation|GO:0006897=endocytosis|GO:0006468=protein phosphorylation|GO:0045747=positive regulation of Notch signaling pathway|GO:0050821=protein stabilization|GO:2000369=regulation of clathrin-mediated endocytosis	THC2574997	ENST00000406297		22848
AAMDC	-0.0702434	Detected	0.0702438	Detected	4.75e-07	0.266908	Detected	0.176497	Detected	0.221703	0.117468	2440	2320	2800	2410	NM_024684	ref|Homo sapiens adipogenesis associated, Mth938 domain containing (AAMDC), mRNA [NM_024684]	adipogenesis associated, Mth938 domain containing	ref|NM_024684|ens|ENST00000526415|ens|ENST00000393427|ens|ENST00000526164	GO:0043066|GO:0005737|GO:0045944|GO:0045600		GO:0005737=cytoplasm	GO:0043066=negative regulation of apoptotic process|GO:0045600=positive regulation of fat cell differentiation|GO:0045944=positive regulation of transcription from RNA polymerase II promoter	THC2473324	ENST00000526415	Hs.745040	28971
AAMP	-0.0478377	Detected	0.0478373	Detected	-4.77e-07	0.0622616	Detected	-0.361951	Detected	-0.149845	0.561941	4600	4240	4510	3080	NM_001087	ref|Homo sapiens angio-associated, migratory cell protein (AAMP), transcript variant 2, mRNA [NM_001087]	angio-associated, migratory cell protein	ref|NM_001087|ref|NM_001302545|ens|ENST00000489767|ens|ENST00000494720	GO:0010595|GO:0005737|GO:0009986|GO:0005886|GO:0014909|GO:0001525|GO:0008201|GO:0030154	GO:0008201=heparin binding	GO:0005737=cytoplasm|GO:0005886=plasma membrane|GO:0009986=cell surface	GO:0014909=smooth muscle cell migration|GO:0001525=angiogenesis|GO:0030154=cell differentiation|GO:0010595=positive regulation of endothelial cell migration	THC2561212	ENST00000489767	Hs.83347	14
AANAT	-0.251195	Compromised	0.251195	Compromised	0	0.763675	Detected	0.867963	Detected	0.815819	0.0862845	7.3	8.92	13.4	13.2	NM_001166579	ref|Homo sapiens aralkylamine N-acetyltransferase (AANAT), transcript variant 1, mRNA [NM_001166579]	aralkylamine N-acetyltransferase	ref|NM_001166579|ref|NM_001088|ref|NR_110548|ens|ENST00000250615	GO:0051412|GO:0032868|GO:0048471|GO:0030187|GO:0044281|GO:0010043|GO:0005829|GO:0071889|GO:0051592|GO:0034641|GO:0046219|GO:0034695|GO:0004060|GO:0007623|GO:0009416|GO:0004059|GO:0071320|GO:0046688|GO:0034097|GO:0006474	GO:0004060=arylamine N-acetyltransferase activity|GO:0004059=aralkylamine N-acetyltransferase activity|GO:0071889=14-3-3 protein binding	GO:0048471=perinuclear region of cytoplasm|GO:0005829=cytosol	GO:0034097=response to cytokine|GO:0010043=response to zinc ion|GO:0034695=response to prostaglandin E|GO:0046688=response to copper ion|GO:0006474=N-terminal protein amino acid acetylation|GO:0046219=indolalkylamine biosynthetic process|GO:0007623=circadian rhythm|GO:0009416=response to light stimulus|GO:0044281=small molecule metabolic process|GO:0051412=response to corticosterone|GO:0032868=re…	THC2490308	ENST00000250615	Hs.431417	15
AAR2	-0.0564697	Detected	0.0564697	Detected	0	0.0272748	Detected	-0.116503	Detected	-0.0446141	0.673785	1340	1250	1290	1070	NM_015511	ref|Homo sapiens AAR2 splicing factor homolog (S. cerevisiae) (AAR2), transcript variant 1, mRNA [NM_015511]	AAR2 splicing factor homolog (S. cerevisiae)	ref|NM_015511|ref|NM_001271874|ens|ENST00000373932|ens|ENST00000320849					THC2466790	ENST00000373932	Hs.11314	25980
AARD	0.0252719	Compromised	-0.0252719	Compromised	0	0.365676	Compromised	-0.799487	Compromised	-0.216905	0.74563	7.66	6.38	8.81	3.6	NM_001025357	ref|Homo sapiens alanine and arginine rich domain containing protein (AARD), mRNA [NM_001025357]	alanine and arginine rich domain containing protein	ref|NM_001025357|ens|ENST00000378279|gb|BC142621|tc|THC2533349	GO:0030324			GO:0030324=lung development	THC2533349	ENST00000378279	Hs.437551	441376
AARS	0.00135565	Detected	-0.00135612	Detected	-4.769e-07	-0.0759945	Detected	-0.77691	Detected	-0.426452	0.347773	4100	3530	3530	1990	NM_001605	ref|Homo sapiens alanyl-tRNA synthetase (AARS), mRNA [NM_001605]	alanyl-tRNA synthetase	ref|NM_001605|ens|ENST00000569825|ens|ENST00000261772|gb|DQ891634	GO:0010467|GO:0002161|GO:0000049|GO:0006419|GO:0004813|GO:0005524|GO:0006400|GO:0008033|GO:0030968|GO:0005829|GO:0006418|GO:0043524|GO:0005737|GO:0016020|GO:0021680|GO:0006457|GO:0050885|GO:0008270|GO:0006450|GO:0043200|GO:0016597|GO:0001942|GO:0070062	GO:0008270=zinc ion binding|GO:0002161=aminoacyl-tRNA editing activity|GO:0000049=tRNA binding|GO:0005524=ATP binding|GO:0004813=alanine-tRNA ligase activity|GO:0016597=amino acid binding	GO:0070062=extracellular exosome|GO:0005737=cytoplasm|GO:0016020=membrane|GO:0005829=cytosol	GO:0008033=tRNA processing|GO:0006450=regulation of translational fidelity|GO:0043200=response to amino acid|GO:0006457=protein folding|GO:0006400=tRNA modification|GO:0043524=negative regulation of neuron apoptotic process|GO:0006418=tRNA aminoacylation for protein translation|GO:0021680=cerebellar Purkinje cell layer development|GO:0001942=hair follicle development|GO:0030968=endoplasmic reticu…	THC2576320	ENST00000569825	Hs.315137	16
AARS2	0.12433	Detected	-0.12433	Detected	0	-0.0320718	Detected	0.15329	Detected	0.0606091	0.733619	1460	1060	1190	1240	NM_020745	ref|Homo sapiens alanyl-tRNA synthetase 2, mitochondrial (AARS2), mRNA [NM_020745]	alanyl-tRNA synthetase 2, mitochondrial	ref|NM_020745|ens|ENST00000244571|ref|XM_005249245|gb|AB033096	GO:0005739|GO:0010467|GO:0000049|GO:0033108|GO:0070143|GO:0004813|GO:0008270|GO:0005524|GO:0006418	GO:0005524=ATP binding|GO:0008270=zinc ion binding|GO:0004813=alanine-tRNA ligase activity|GO:0000049=tRNA binding	GO:0005739=mitochondrion	GO:0006418=tRNA aminoacylation for protein translation|GO:0070143=mitochondrial alanyl-tRNA aminoacylation|GO:0010467=gene expression|GO:0033108=mitochondrial respiratory chain complex assembly	THC2491596	ENST00000244571	Hs.158381	57505
AASDH	0.0677798	Detected	-0.0677798	Detected	0	-0.105892	Detected	0.262947	Detected	0.0785274	0.728043	149	117	120	142	NM_181806	ref|Homo sapiens aminoadipate-semialdehyde dehydrogenase (AASDH), transcript variant 1, mRNA [NM_181806]	aminoadipate-semialdehyde dehydrogenase	ref|NM_181806|ref|NM_001286672|ref|NM_001286671|ref|NM_001286669	GO:0006631|GO:0016878|GO:0005524	GO:0005524=ATP binding|GO:0016878=acid-thiol ligase activity		GO:0006631=fatty acid metabolic process	THC2703687	ENST00000502617	Hs.104347	132949
AASDHPPT	0.0561206	Detected	-0.0561206	Detected	0	-0.213221	Detected	0.362733	Detected	0.0747559	0.822687	2030	1620	1530	2090	NM_015423	ref|Homo sapiens aminoadipate-semialdehyde dehydrogenase-phosphopantetheinyl transferase (AASDHPPT), mRNA [NM_015423]	aminoadipate-semialdehyde dehydrogenase-phosphopantetheinyl transferase	ref|NM_015423|ens|ENST00000534152|ens|ENST00000278618|gb|AB072896	GO:0005515|GO:0000287|GO:0015939|GO:0009059|GO:0006766|GO:0006767|GO:0044281|GO:0008897|GO:0070062|GO:0005829	GO:0000287=magnesium ion binding|GO:0005515=protein binding|GO:0008897=holo-[acyl-carrier-protein] synthase activity	GO:0070062=extracellular exosome|GO:0005829=cytosol	GO:0044281=small molecule metabolic process|GO:0006767=water-soluble vitamin metabolic process|GO:0015939=pantothenate metabolic process|GO:0009059=macromolecule biosynthetic process|GO:0006766=vitamin metabolic process	THC2469513	ENST00000534152	Hs.524009	60496
AASS	-0.147158	Compromised	0.147158	Compromised	4.8e-07	0.200676	Compromised	0.403902	Compromised	0.302289	0.233026	1.73	1.83	2	2.11	NM_005763	ref|Homo sapiens aminoadipate-semialdehyde synthase (AASS), mRNA [NM_005763]	aminoadipate-semialdehyde synthase	ref|NM_005763|ens|ENST00000358954|ens|ENST00000431170|ens|ENST00000417368	GO:0005739|GO:0034641|GO:0051262|GO:0033512|GO:0005759|GO:0047130|GO:0047131|GO:0044281|GO:0006554|GO:0055114|GO:0043231	GO:0047131=saccharopine dehydrogenase (NAD+, L-glutamate-forming) activity|GO:0047130=saccharopine dehydrogenase (NADP+, L-lysine-forming) activity	GO:0005759=mitochondrial matrix|GO:0043231=intracellular membrane-bounded organelle|GO:0005739=mitochondrion	GO:0044281=small molecule metabolic process|GO:0051262=protein tetramerization|GO:0055114=oxidation-reduction process|GO:0034641=cellular nitrogen compound metabolic process|GO:0006554=lysine catabolic process|GO:0033512=L-lysine catabolic process to acetyl-CoA via saccharopine	THC2471460	ENST00000358954	Hs.156738	10157
AATBC	0.0395541	Detected	-0.0395541	Detected	0	0.0783315	Detected	0.364903	Detected	0.221617	0.274477	18.3123	14.9533	17.088	19.1	NR_026961	ref|Homo sapiens uncharacterized LOC284837 (AATBC), long non-coding RNA [NR_026961]	uncharacterized LOC284837	ref|NR_026961|linc|lnc-CSTB-1:6|linc|lnc-CSTB-1:8|linc|lnc-CSTB-1:9							Hs.592159	284837
AATF	-0.0874486	Detected	0.0874491	Detected	4.74e-07	0.115904	Detected	-0.4031	Detected	-0.143598	0.652333	3050	2970	3190	2040	NM_012138	ref|Homo sapiens apoptosis antagonizing transcription factor (AATF), mRNA [NM_012138]	apoptosis antagonizing transcription factor	ref|NM_012138|ens|ENST00000620004|ens|ENST00000619387|gb|AB385572	GO:0005515|GO:0048011|GO:0043066|GO:0005813|GO:0043065|GO:0003700|GO:0005794|GO:0042254|GO:0048156|GO:0005730|GO:0032929|GO:0005634|GO:0097190|GO:0042985|GO:0006974|GO:0043522|GO:0007346|GO:0005737|GO:0040016|GO:0045944|GO:2000378|GO:0007155|GO:0005925	GO:0043522=leucine zipper domain binding|GO:0003700=transcription factor activity, sequence-specific DNA binding|GO:0005515=protein binding|GO:0048156=tau protein binding	GO:0005794=Golgi apparatus|GO:0005730=nucleolus|GO:0005634=nucleus|GO:0005813=centrosome|GO:0005925=focal adhesion|GO:0005737=cytoplasm	GO:0040016=embryonic cleavage|GO:0042254=ribosome biogenesis|GO:0097190=apoptotic signaling pathway|GO:0007155=cell adhesion|GO:0006974=cellular response to DNA damage stimulus|GO:0045944=positive regulation of transcription from RNA polymerase II promoter|GO:0042985=negative regulation of amyloid precursor protein biosynthetic process|GO:0007346=regulation of mitotic cell cycle|GO:0048011=neurot…	THC2763179	ENST00000620004	Hs.195740	26574
AATK	-0.00929069	Detected	0.00929069	Detected	0	-0.264042	Detected	-0.0702481	Detected	-0.167145	0.228098	154.396	134.907	117.55	123.207	NM_001080395	ref|Homo sapiens apoptosis-associated tyrosine kinase (AATK), transcript variant 1, mRNA [NM_001080395]	apoptosis-associated tyrosine kinase	ref|NM_001080395|ref|NM_004920|ens|ENST00000374792|ens|ENST00000570932	GO:0005515|GO:0048471|GO:0005783|GO:0044295|GO:0051402|GO:0005524|GO:0004674|GO:0007420|GO:0030517|GO:0004713|GO:0016021|GO:0032482|GO:0055037|GO:0038083	GO:0004674=protein serine/threonine kinase activity|GO:0005524=ATP binding|GO:0004713=protein tyrosine kinase activity|GO:0005515=protein binding	GO:0005783=endoplasmic reticulum|GO:0048471=perinuclear region of cytoplasm|GO:0044295=axonal growth cone|GO:0016021=integral component of membrane|GO:0055037=recycling endosome	GO:0032482=Rab protein signal transduction|GO:0038083=peptidyl-tyrosine autophosphorylation|GO:0007420=brain development|GO:0030517=negative regulation of axon extension|GO:0051402=neuron apoptotic process	THC2471583	ENST00000374792	Hs.514575	9625
AATK-AS1	0.709151	Compromised	-0.709151	Compromised	0	0.600826	Compromised	-0.352028	Compromised	0.124399	0.89758	5.45186	1.75955	4.59421	2.17495	NR_027255	ref|Homo sapiens AATK antisense RNA 1 (AATK-AS1), long non-coding RNA [NR_027255]	AATK antisense RNA 1	ref|NR_027255|linc|lnc-BAIAP2-2:2|linc|lnc-BAIAP2-2:1|gb|BC171777					THC2489764		Hs.591202	388428
AB020701	-0.148572	Compromised	0.148573	Compromised	4.8e-07	0.257381	Compromised	0.4872	Compromised	0.37229	0.185959	1.67	1.77	2.01	2.16	AB020701	gb|Homo sapiens mRNA for KIAA0894 protein, partial cds. [AB020701]		gb|AB020701|tc|THC2492724|tc|THC2676699
AB051446	0.272683	Compromised	-0.272683	Compromised	0	-0.158876	Compromised	0.093864	Compromised	-0.0325062	0.923743	2.91	1.72	1.96	2.14	AB051446	gb|Homo sapiens mRNA for KIAA1659 protein, partial cds. [AB051446]		gb|AB051446|tc|THC2578064
AB072904	-0.0432601	Compromised	0.0432601	Compromised	0	-1.05666	Compromised	-0.852672	Compromised	-0.954665	0.0132013	4.4	4.03	1.98	2.09	AB072904	gb|Homo sapiens mRNA for putative protein product of Nbla11895, complete cds. [AB072904]		gb|AB072904|tc|THC2489892
AB088847	-0.147619	Compromised	0.147618	Compromised	-4.7e-07	0.209759	Compromised	0.413363	Compromised	0.311561	0.224435	1.71	1.81	1.99	2.1	AB088847	gb|Homo sapiens BPA-1 mRNA for brain peptide A1, complete cds. [AB088847]		gb|AB088847
AB209400	0.244267	Detected	-0.244267	Detected	0	-0.223625	Detected	0.33893	Detected	0.0576525	0.89122	405	249	266	360	AB209400	gb|Homo sapiens mRNA for basic FGF-repressed Zic binding protein isoform a variant protein. [AB209400]		gb|AB209400|tc|THC2718458|tc|THC2621953
AB306153	-0.252041	Compromised	0.252041	Compromised	0	1.54064	Compromised	0.401723	Compromised	0.97118	0.259224	1.97	2.41	6.2	2.58	AB306153	gb|Homo sapiens mRNA for T cell receptor beta variable 5, partial cds, clone: un 66. [AB306153]		gb|AB306153|gb|M97709|gb|A25490|gb|X58803
AB306238	-0.396427	Compromised	0.396427	Compromised	0	-0.0914626	Compromised	0.131197	Compromised	0.0198672	0.965903	1.8	2.69	2.02	2.16	AB306238	gb|Homo sapiens mRNA for T cell receptor beta variable 6, partial cds, clone: un 226. [AB306238]		gb|AB306238|gb|AB305928|gb|AB305899|gb|AF397442
AB363267	0.898541	Compromised	-0.898541	Compromised	0	0.0101414	Compromised	0.413763	Compromised	0.211952	0.839372	7.01	1.74	3.44	4.17	AB363267	gb|Homo sapiens IGK mRNA for immunoglobulin kappa light chain, partial cds, clone: F010-014L. [AB363267]		gb|AB363267|gb|AF103412|gb|DQ322856|gb|DQ322857
AB384543	-0.50226	Compromised	0.502259	Compromised	-2.3e-07	-0.446848	Compromised	0.0515528	Compromised	-0.197648	0.758137	4.64	8.03	4.38	5.67	AB384543	gb|Synthetic construct DNA, clone: pF1KA0919, Homo sapiens EXOC6B gene for exocyst complex component Sec15B, complete cds, without stop codon, in Flexi system. [AB384543]		gb|AB384543|tc|THC2605866
AB385295	0.35113	Detected	-0.35113	Detected	0	-0.172848	Detected	0.0579774	Detected	-0.057435	0.890778	315	167	199	214	AB385295	gb|Synthetic construct DNA, clone: pF1KA0197, Homo sapiens NUP160 gene for nucleoporin 160kDa, complete cds, without stop codon, in Flexi system. [AB385295]		gb|AB385295|gb|D83781|tc|THC2495390
AB529256	-0.165944	Detected	0.165944	Detected	0	-1.12687	Compromised	-0.471962	Compromised	-0.799418	0.161336	10.5	11.4	4.9	7.07	AB529256	gb|Synthetic construct DNA, clone: pF1KE0827, Homo sapiens OR4A13P gene for Putative olfactory receptor, family 4, subfamily A, member 13, without stop codon, in Flexi system. [AB529256]		gb|AB529256|tc|NP511198
ABAT	0.0608478	Detected	-0.0608473	Detected	4.78e-07	-0.17627	Detected	0.187535	Detected	0.0056324	0.979242	3620	2870	2790	3290	NM_000663	ref|Homo sapiens 4-aminobutyrate aminotransferase (ABAT), transcript variant 2, mRNA [NM_000663]	4-aminobutyrate aminotransferase	ref|NM_000663|ens|ENST00000568847|ens|ENST00000561870|ens|ENST00000566590	GO:0043005|GO:0001666|GO:0003867|GO:0045471|GO:0042493|GO:0048148|GO:0007268|GO:0045776|GO:0047298|GO:0042803|GO:0007269|GO:0005739|GO:0032145|GO:0032144|GO:0005759|GO:0010039|GO:0030170|GO:0009450|GO:0007626|GO:0042135|GO:0007620|GO:0070062|GO:0035094	GO:0030170=pyridoxal phosphate binding|GO:0042803=protein homodimerization activity|GO:0003867=4-aminobutyrate transaminase activity|GO:0047298=(S)-3-amino-2-methylpropionate transaminase activity|GO:0032145=succinate-semialdehyde dehydrogenase binding	GO:0043005=neuron projection|GO:0070062=extracellular exosome|GO:0005759=mitochondrial matrix|GO:0005739=mitochondrion|GO:0032144=4-aminobutyrate transaminase complex	GO:0009450=gamma-aminobutyric acid catabolic process|GO:0007268=synaptic transmission|GO:0045776=negative regulation of blood pressure|GO:0007620=copulation|GO:0042135=neurotransmitter catabolic process|GO:0035094=response to nicotine|GO:0007269=neurotransmitter secretion|GO:0045471=response to ethanol|GO:0001666=response to hypoxia|GO:0007626=locomotory behavior|GO:0048148=behavioral response to…	THC2608590	ENST00000396600	Hs.336768	18
ABCA1	-0.572259	Detected	0.572259	Detected	0	0.747847	Detected	0.100509	Detected	0.424178	0.584938	27.6881	52.8	62.8	36.7423	NM_005502	ref|Homo sapiens ATP-binding cassette, sub-family A (ABC1), member 1 (ABCA1), mRNA [NM_005502]	ATP-binding cassette, sub-family A (ABC1), member 1	ref|NM_005502|ens|ENST00000374733|ens|ENST00000423487|ens|ENST00000374736	GO:0005515|GO:0008509|GO:0031267|GO:0071300|GO:0071397|GO:0034364|GO:0006497|GO:0051117|GO:0044255|GO:0019905|GO:0042632|GO:0033344|GO:0005794|GO:0010745|GO:0050702|GO:0043691|GO:0005548|GO:0038027|GO:0055098|GO:0007186|GO:0005887|GO:0042157|GO:0055091|GO:0045121|GO:0007040|GO:0009897|GO:0032367|GO:0048471|GO:0005886|GO:0017127|GO:0030819|GO:0030139|GO:0044281|GO:0010875|GO:0045332|GO:0005543|GO:…	GO:0016887=ATPase activity|GO:0005548=phospholipid transporter activity|GO:0034185=apolipoprotein binding|GO:0015485=cholesterol binding|GO:0019905=syntaxin binding|GO:0034188=apolipoprotein A-I receptor activity|GO:0034186=apolipoprotein A-I binding|GO:0005515=protein binding|GO:0008509=anion transmembrane transporter activity|GO:0031267=small GTPase binding|GO:0005524=ATP binding|GO:0017127=cho…	GO:0005794=Golgi apparatus|GO:0045335=phagocytic vesicle|GO:0005886=plasma membrane|GO:0030139=endocytic vesicle|GO:0009897=external side of plasma membrane|GO:0005887=integral component of plasma membrane|GO:0034364=high-density lipoprotein particle|GO:0048471=perinuclear region of cytoplasm|GO:0045121=membrane raft	GO:0055098=response to low-density lipoprotein particle|GO:0055091=phospholipid homeostasis|GO:0044281=small molecule metabolic process|GO:0006911=phagocytosis, engulfment|GO:0045332=phospholipid translocation|GO:0032367=intracellular cholesterol transport|GO:0032489=regulation of Cdc42 protein signal transduction|GO:0060155=platelet dense granule organization|GO:0038027=apolipoprotein A-I-mediat…	THC2499682	ENST00000374736	Hs.659274	19
ABCA10	-0.216405	Detected	0.216405	Detected	2.4e-07	-0.751924	Compromised	-0.323591	Compromised	-0.537758	0.219394	8.76	10.2	5.49	6.77	NM_080282	ref|Homo sapiens ATP-binding cassette, sub-family A (ABC1), member 10 (ABCA10), mRNA [NM_080282]	ATP-binding cassette, sub-family A (ABC1), member 10	ref|NM_080282|ref|NR_002451|ens|ENST00000518929|ens|ENST00000523419	GO:0005215|GO:0008152|GO:0006810|GO:0016021|GO:0016887|GO:0005524	GO:0016887=ATPase activity|GO:0005524=ATP binding|GO:0005215=transporter activity	GO:0016021=integral component of membrane	GO:0008152=metabolic process|GO:0006810=transport	THC2508298	ENST00000518929	Hs.25377	10349
ABCA11P	0.0844276	Detected	-0.0844276	Detected	0	-0.555383	Detected	-0.158837	Detected	-0.35711	0.239344	76.5	58.7	44.6	53.8	NR_002451	ref|Homo sapiens ATP-binding cassette, sub-family A (ABC1), member 11, pseudogene (ABCA11P), non-coding RNA [NR_002451]	ATP-binding cassette, sub-family A (ABC1), member 11, pseudogene	ref|NR_002451|ens|ENST00000515578|ens|ENST00000507854|ens|ENST00000514396	GO:0005215|GO:0008152|GO:0006810|GO:0016021|GO:0016887|GO:0005524	GO:0016887=ATPase activity|GO:0005524=ATP binding|GO:0005215=transporter activity	GO:0016021=integral component of membrane	GO:0008152=metabolic process|GO:0006810=transport	THC2488382	ENST00000515578	Hs.745030	79963
ABCA12	0.164726	Detected	-0.164726	Detected	0	0.000769377	Detected	-0.00403428	Detected	-0.00163245	0.992993	1850	1270	1500	1370	NM_173076	ref|Homo sapiens ATP-binding cassette, sub-family A (ABC1), member 12 (ABCA12), transcript variant 1, mRNA [NM_173076]	ATP-binding cassette, sub-family A (ABC1), member 12	ref|NM_173076|ref|NM_015657|ref|NR_103740|ens|ENST00000272895	GO:0005515|GO:0097209|GO:0005886|GO:0005743|GO:0031424|GO:0061436|GO:0010875|GO:0005829|GO:0045055|GO:0005737|GO:0034191|GO:2000010|GO:0043129|GO:0019725|GO:0035627|GO:0048286|GO:0005102|GO:0055088|GO:0005524|GO:0072659|GO:0033700|GO:0034040|GO:0008152|GO:0006869|GO:0016021|GO:0032940|GO:0005319	GO:0034191=apolipoprotein A-I receptor binding|GO:0005524=ATP binding|GO:0034040=lipid-transporting ATPase activity|GO:0005102=receptor binding|GO:0005515=protein binding|GO:0005319=lipid transporter activity	GO:0005829=cytosol|GO:0097209=epidermal lamellar body|GO:0005886=plasma membrane|GO:0005743=mitochondrial inner membrane|GO:0005737=cytoplasm|GO:0016021=integral component of membrane	GO:0061436=establishment of skin barrier|GO:0043129=surfactant homeostasis|GO:0048286=lung alveolus development|GO:0045055=regulated secretory pathway|GO:0010875=positive regulation of cholesterol efflux|GO:0032940=secretion by cell|GO:0019725=cellular homeostasis|GO:2000010=positive regulation of protein localization to cell surface|GO:0055088=lipid homeostasis|GO:0008152=metabolic process|GO:00…	THC2475173	ENST00000272895	Hs.134585	26154
ABCA13	-0.169025	Compromised	0.169025	Compromised	4.8e-07	0.252753	Compromised	0.501884	Compromised	0.377319	0.214161	1.66	1.81	2.02	2.2	NM_152701	ref|Homo sapiens ATP-binding cassette, sub-family A (ABC1), member 13 (ABCA13), mRNA [NM_152701]	ATP-binding cassette, sub-family A (ABC1), member 13	ref|NM_152701|ens|ENST00000435803|gb|AK091270|gb|AX746886	GO:0005215|GO:0008152|GO:0006810|GO:0016021|GO:0016887|GO:0005524	GO:0016887=ATPase activity|GO:0005524=ATP binding|GO:0005215=transporter activity	GO:0016021=integral component of membrane	GO:0008152=metabolic process|GO:0006810=transport	THC2472189	ENST00000435803	Hs.226568	154664
ABCA17P	-0.159107	Compromised	0.159107	Compromised	0	0.288668	Compromised	0.547487	Compromised	0.418077	0.178362	1.59	1.71	1.97	2.16	NR_003574	ref|Homo sapiens ATP-binding cassette, sub-family A (ABC1), member 17, pseudogene (ABCA17P), non-coding RNA [NR_003574]	ATP-binding cassette, sub-family A (ABC1), member 17, pseudogene	ref|NR_003574|ens|ENST00000494925|ens|ENST00000469908|gb|DQ266102					THC2731745	ENST00000494925	Hs.376281	650655
ABCA2	-0.857218	Detected	0.857218	Detected	0	-0.654845	Detected	-0.591713	Detected	-0.623279	0.543004	43.4511	123	45.4148	43.4787	NM_001606	ref|Homo sapiens ATP-binding cassette, sub-family A (ABC1), member 2 (ABCA2), transcript variant 1, mRNA [NM_001606]	ATP-binding cassette, sub-family A (ABC1), member 2	ref|NM_001606|ref|NM_212533|ens|ENST00000464520|ens|ENST00000459850	GO:0042632|GO:0006629|GO:0005815|GO:0006357|GO:0042493|GO:0042626|GO:0048545|GO:0005765|GO:0055085|GO:0005524|GO:0005764|GO:0000166|GO:0016020|GO:0006810|GO:0016023|GO:0016021|GO:0032383|GO:0043190|GO:0016887|GO:0010008|GO:0005768	GO:0016887=ATPase activity|GO:0042626=ATPase activity, coupled to transmembrane movement of substances|GO:0000166=nucleotide binding|GO:0005524=ATP binding	GO:0005765=lysosomal membrane|GO:0005764=lysosome|GO:0005768=endosome|GO:0005815=microtubule organizing center|GO:0016020=membrane|GO:0016021=integral component of membrane|GO:0016023=cytoplasmic membrane-bounded vesicle|GO:0010008=endosome membrane|GO:0043190=ATP-binding cassette (ABC) transporter complex	GO:0055085=transmembrane transport|GO:0032383=regulation of intracellular cholesterol transport|GO:0048545=response to steroid hormone|GO:0042632=cholesterol homeostasis|GO:0006810=transport|GO:0006357=regulation of transcription from RNA polymerase II promoter|GO:0042493=response to drug|GO:0006629=lipid metabolic process	THC2617219	ENST00000464520	Hs.421202	20
ABCA3	-0.0139148	Detected	0.0139148	Detected	0	0.167546	Detected	0.0486772	Detected	0.108112	0.218555	1990	1750	2050	1730	NM_001089	ref|Homo sapiens ATP-binding cassette, sub-family A (ABC1), member 3 (ABCA3), mRNA [NM_001089]	ATP-binding cassette, sub-family A (ABC1), member 3	ref|NM_001089|ens|ENST00000301732|gb|BC140895|gb|BC146866	GO:0005215|GO:0097233|GO:0005886|GO:0097208|GO:0042493|GO:0042626|GO:0005524|GO:0005615|GO:0055085|GO:0016020|GO:0008152|GO:0006810|GO:0016021	GO:0042626=ATPase activity, coupled to transmembrane movement of substances|GO:0005215=transporter activity|GO:0005524=ATP binding	GO:0005886=plasma membrane|GO:0005615=extracellular space|GO:0097233=alveolar lamellar body membrane|GO:0016020=membrane|GO:0016021=integral component of membrane|GO:0097208=alveolar lamellar body	GO:0055085=transmembrane transport|GO:0008152=metabolic process|GO:0006810=transport|GO:0042493=response to drug	THC2462218	ENST00000301732	Hs.26630	21
ABCA4	-0.14809	Compromised	0.14809	Compromised	-4.7e-07	1.77699	Compromised	0.422978	Compromised	1.09998	0.253368	1.69	1.79	5.83	2.09	NM_000350	ref|Homo sapiens ATP-binding cassette, sub-family A (ABC1), member 4 (ABCA4), mRNA [NM_000350]	ATP-binding cassette, sub-family A (ABC1), member 4	ref|NM_000350|ens|ENST00000370225|ens|ENST00000536513|gb|U88667	GO:0005215|GO:0006649|GO:0007603|GO:0042626|GO:0045494|GO:0055085|GO:0001523|GO:0005524|GO:0045332|GO:0016020|GO:0005887|GO:0004012|GO:0006810|GO:0007601	GO:0042626=ATPase activity, coupled to transmembrane movement of substances|GO:0004012=phospholipid-translocating ATPase activity|GO:0005215=transporter activity|GO:0005524=ATP binding	GO:0005887=integral component of plasma membrane|GO:0016020=membrane	GO:0055085=transmembrane transport|GO:0007601=visual perception|GO:0006810=transport|GO:0006649=phospholipid transfer to membrane|GO:0007603=phototransduction, visible light|GO:0001523=retinoid metabolic process|GO:0045332=phospholipid translocation|GO:0045494=photoreceptor cell maintenance	THC2464953	ENST00000370225	Hs.416707	24
ABCA5	0.29197	Detected	-0.29197	Detected	0	0.162086	Detected	0.556559	Detected	0.359323	0.415105	212	122	176	212	NM_018672	ref|Homo sapiens ATP-binding cassette, sub-family A (ABC1), member 5 (ABCA5), transcript variant 1, mRNA [NM_018672]	ATP-binding cassette, sub-family A (ABC1), member 5	ref|NM_018672|ref|NM_172232|ens|ENST00000586601|ens|ENST00000586995	GO:0005215|GO:0033344|GO:0010745|GO:0005770|GO:0043691|GO:0005765|GO:0005524|GO:0005764|GO:0000139|GO:0008152|GO:0031902|GO:0034375|GO:0016021|GO:0016887	GO:0016887=ATPase activity|GO:0005215=transporter activity|GO:0005524=ATP binding	GO:0005770=late endosome|GO:0000139=Golgi membrane|GO:0005765=lysosomal membrane|GO:0005764=lysosome|GO:0031902=late endosome membrane|GO:0016021=integral component of membrane	GO:0034375=high-density lipoprotein particle remodeling|GO:0008152=metabolic process|GO:0043691=reverse cholesterol transport|GO:0033344=cholesterol efflux|GO:0010745=negative regulation of macrophage derived foam cell differentiation	NP710343	ENST00000586601	Hs.731824	23461
ABCA6	-0.612066	Compromised	0.612066	Compromised	4.7e-07	-0.282638	Compromised	-0.182418	Compromised	-0.232528	0.741371	1.98	3.99	2.26	2.22	NM_080284	ref|Homo sapiens ATP-binding cassette, sub-family A (ABC1), member 6 (ABCA6), mRNA [NM_080284]	ATP-binding cassette, sub-family A (ABC1), member 6	ref|NM_080284|ens|ENST00000284425|ref|XM_006721791|ref|XM_006721792	GO:0005215|GO:0008152|GO:0006810|GO:0016021|GO:0016887|GO:0005524	GO:0016887=ATPase activity|GO:0005524=ATP binding|GO:0005215=transporter activity	GO:0016021=integral component of membrane	GO:0008152=metabolic process|GO:0006810=transport	THC2470497	ENST00000284425	Hs.709514	23460
ABCA7	0.0603788	Detected	-0.0603788	Detected	0	0.150074	Detected	0.0386632	Detected	0.0943687	0.369513	150	119	145	123	NM_019112	ref|Homo sapiens ATP-binding cassette, sub-family A (ABC1), member 7 (ABCA7), mRNA [NM_019112]	ATP-binding cassette, sub-family A (ABC1), member 7	ref|NM_019112|ens|ENST00000263094|ens|ENST00000433129|ref|XM_006722616	GO:0006909|GO:0005215|GO:0017121|GO:0034504|GO:0005886|GO:1900223|GO:0010875|GO:0050766|GO:0005737|GO:0016324|GO:0034380|GO:0007613|GO:0070374|GO:0043190|GO:0016887|GO:0033344|GO:0005794|GO:0009986|GO:0001891|GO:0032587|GO:0032780|GO:0005548|GO:0032781|GO:0055085|GO:0038027|GO:0005524|GO:0042985|GO:0033700|GO:0018149|GO:0000139|GO:0016021|GO:0010008|GO:0034188	GO:0016887=ATPase activity|GO:0005215=transporter activity|GO:0005524=ATP binding|GO:0005548=phospholipid transporter activity|GO:0034188=apolipoprotein A-I receptor activity	GO:0005794=Golgi apparatus|GO:0000139=Golgi membrane|GO:0001891=phagocytic cup|GO:0032587=ruffle membrane|GO:0043190=ATP-binding cassette (ABC) transporter complex|GO:0005886=plasma membrane|GO:0009986=cell surface|GO:0005737=cytoplasm|GO:0016021=integral component of membrane|GO:0010008=endosome membrane|GO:0016324=apical plasma membrane	GO:0007613=memory|GO:0017121=phospholipid scrambling|GO:0010875=positive regulation of cholesterol efflux|GO:0034504=protein localization to nucleus|GO:0034380=high-density lipoprotein particle assembly|GO:0055085=transmembrane transport|GO:0038027=apolipoprotein A-I-mediated signaling pathway|GO:0032780=negative regulation of ATPase activity|GO:0032781=positive regulation of ATPase activity|GO:1…	THC2634543	ENST00000263094	Hs.134514	10347
ABCA8	-0.15848	Compromised	0.158479	Compromised	-4.8e-07	0.278593	Compromised	0.540057	Compromised	0.409325	0.18454	1.60997	1.72997	1.98	2.17495	NM_007168	ref|Homo sapiens ATP-binding cassette, sub-family A (ABC1), member 8 (ABCA8), transcript variant 2, mRNA [NM_007168]	ATP-binding cassette, sub-family A (ABC1), member 8	ref|NM_007168|ref|NM_001288986|ref|NM_001288985|ens|ENST00000615593	GO:0005886|GO:0008152|GO:0006810|GO:0005743|GO:0042626|GO:0016021|GO:0055085|GO:0005524	GO:0005524=ATP binding|GO:0042626=ATPase activity, coupled to transmembrane movement of substances	GO:0016021=integral component of membrane|GO:0005886=plasma membrane|GO:0005743=mitochondrial inner membrane	GO:0055085=transmembrane transport|GO:0008152=metabolic process|GO:0006810=transport	THC2463630	ENST00000430352	Hs.58351	10351
ABCA9	0.124864	Detected	-0.124864	Detected	4.75e-07	0.214561	Detected	-0.212583	Detected	0.00098896	0.997174	5100	3700	4930	3360	NM_080283	ref|Homo sapiens ATP-binding cassette, sub-family A (ABC1), member 9 (ABCA9), mRNA [NM_080283]	ATP-binding cassette, sub-family A (ABC1), member 9	ref|NM_080283|ens|ENST00000340001|ref|XM_005256935|ref|XM_006721633	GO:0005739|GO:0005215|GO:0008152|GO:0006810|GO:0016021|GO:0016887|GO:0005524	GO:0016887=ATPase activity|GO:0005524=ATP binding|GO:0005215=transporter activity	GO:0005739=mitochondrion|GO:0016021=integral component of membrane	GO:0008152=metabolic process|GO:0006810=transport	NP590209	ENST00000340001	Hs.131686	10350
ABCA9-AS1	-0.168712	Compromised	0.168712	Compromised	0	0.242353	Compromised	0.478125	Compromised	0.360239	0.222172	1.78	1.94	2.15	2.32	NR_126414	ref|Homo sapiens ABCA9 antisense RNA 1 (ABCA9-AS1), long non-coding RNA [NR_126414]	ABCA9 antisense RNA 1	ref|NR_126414|linc|lnc-MAP2K6-3:1|gb|CB960713|tc|THC2717445					THC2717445		Hs.569827	104355297
ABCB1	0.086113	Compromised	-0.086113	Compromised	0	0.298263	Compromised	0.250461	Compromised	0.274362	0.0917354	2.30447	1.76414	2.425	2.14979	NM_000927	ref|Homo sapiens ATP-binding cassette, sub-family B (MDR/TAP), member 1 (ABCB1), mRNA [NM_000927]	ATP-binding cassette, sub-family B (MDR/TAP), member 1	ref|NM_000927|ens|ENST00000416177|ens|ENST00000543898|ens|ENST00000265724	GO:0005515|GO:0005215|GO:0005886|GO:0009986|GO:0042493|GO:0072089|GO:0042626|GO:0042908|GO:0044281|GO:0055085|GO:0005524|GO:0008559|GO:0016020|GO:0000086|GO:0006855|GO:0006810|GO:0016021|GO:0070062	GO:0042626=ATPase activity, coupled to transmembrane movement of substances|GO:0008559=xenobiotic-transporting ATPase activity|GO:0005215=transporter activity|GO:0005524=ATP binding|GO:0005515=protein binding	GO:0005886=plasma membrane|GO:0009986=cell surface|GO:0070062=extracellular exosome|GO:0016020=membrane|GO:0016021=integral component of membrane	GO:0055085=transmembrane transport|GO:0006810=transport|GO:0044281=small molecule metabolic process|GO:0006855=drug transmembrane transport|GO:0000086=G2/M transition of mitotic cell cycle|GO:0042493=response to drug|GO:0072089=stem cell proliferation|GO:0042908=xenobiotic transport	THC2464142	ENST00000475929	Hs.489033	5243
ABCB10	0.0632222	Detected	-0.0632222	Detected	0	-0.0810168	Detected	0.34685	Detected	0.132917	0.61174	222.064	175.478	182.53	225.014	NM_012089	ref|Homo sapiens ATP-binding cassette, sub-family B (MDR/TAP), member 10 (ABCB10), mRNA [NM_012089]	ATP-binding cassette, sub-family B (MDR/TAP), member 10	ref|NM_012089|ens|ENST00000344517|ref|XM_006711754|ref|XM_006711755	GO:0005215|GO:0032592|GO:0008152|GO:0006810|GO:0005743|GO:0042626|GO:0055085|GO:0005524|GO:0042803	GO:0005524=ATP binding|GO:0042626=ATPase activity, coupled to transmembrane movement of substances|GO:0042803=protein homodimerization activity|GO:0005215=transporter activity	GO:0032592=integral component of mitochondrial membrane|GO:0005743=mitochondrial inner membrane	GO:0055085=transmembrane transport|GO:0008152=metabolic process|GO:0006810=transport	THC2463247	ENST00000344517	Hs.17614	23456
ABCB11	-0.162972	Compromised	0.162972	Compromised	0	0.275757	Compromised	0.527882	Compromised	0.401819	0.190449	1.6	1.73	1.97	2.15	NM_003742	ref|Homo sapiens ATP-binding cassette, sub-family B (MDR/TAP), member 11 (ABCB11), mRNA [NM_003742]	ATP-binding cassette, sub-family B (MDR/TAP), member 11	ref|NM_003742|ens|ENST00000263817|ens|ENST00000618180|ref|XM_006712818	GO:0005215|GO:0005886|GO:0006699|GO:0045177|GO:0042626|GO:0015126|GO:0044281|GO:0055085|GO:0005524|GO:0046581|GO:0016020|GO:0005887|GO:0015721|GO:0008554|GO:0015722|GO:0006810|GO:0015432|GO:0035725|GO:0008206|GO:0016021|GO:0070062	GO:0015126=canalicular bile acid transmembrane transporter activity|GO:0042626=ATPase activity, coupled to transmembrane movement of substances|GO:0015432=bile acid-exporting ATPase activity|GO:0008554=sodium-exporting ATPase activity, phosphorylative mechanism|GO:0005215=transporter activity|GO:0005524=ATP binding	GO:0005886=plasma membrane|GO:0046581=intercellular canaliculus|GO:0005887=integral component of plasma membrane|GO:0070062=extracellular exosome|GO:0045177=apical part of cell|GO:0016020=membrane|GO:0016021=integral component of membrane	GO:0055085=transmembrane transport|GO:0006699=bile acid biosynthetic process|GO:0006810=transport|GO:0008206=bile acid metabolic process|GO:0044281=small molecule metabolic process|GO:0035725=sodium ion transmembrane transport|GO:0015722=canalicular bile acid transport|GO:0015721=bile acid and bile salt transport	THC2479770	ENST00000263817	Hs.658439	8647
ABCB4	0.0586634	Detected	-0.0586634	Detected	0	0.0846615	Detected	0.142516	Detected	0.113589	0.224587	58.6	46.6	54.2	51.7	NM_018849	ref|Homo sapiens ATP-binding cassette, sub-family B (MDR/TAP), member 4 (ABCB4), transcript variant B, mRNA [NM_018849]	ATP-binding cassette, sub-family B (MDR/TAP), member 4	ref|NM_018849|ref|NM_000443|ref|NM_018850|ens|ENST00000265723	GO:0006629|GO:0005886|GO:0042493|GO:0042626|GO:0042908|GO:0044281|GO:0055085|GO:0005524|GO:0046581|GO:0008559|GO:0016020|GO:0005887|GO:0006855|GO:0006810|GO:0016021|GO:0044255|GO:0070062	GO:0042626=ATPase activity, coupled to transmembrane movement of substances|GO:0008559=xenobiotic-transporting ATPase activity|GO:0005524=ATP binding	GO:0005886=plasma membrane|GO:0046581=intercellular canaliculus|GO:0005887=integral component of plasma membrane|GO:0070062=extracellular exosome|GO:0016020=membrane|GO:0016021=integral component of membrane	GO:0055085=transmembrane transport|GO:0044255=cellular lipid metabolic process|GO:0006810=transport|GO:0044281=small molecule metabolic process|GO:0006855=drug transmembrane transport|GO:0042493=response to drug|GO:0006629=lipid metabolic process|GO:0042908=xenobiotic transport	THC2486286	ENST00000265723	Hs.654403	5244
ABCB5	-0.145149	Compromised	0.145149	Compromised	0	0.348695	Compromised	0.635028	Compromised	0.491861	0.137294	1.64314	1.73329	2.1019	2.349	NM_001163993	ref|Homo sapiens ATP-binding cassette, sub-family B (MDR/TAP), member 5 (ABCB5), transcript variant 4, mRNA [NM_001163993]	ATP-binding cassette, sub-family B (MDR/TAP), member 5	ref|NM_001163993|gb|BC110370|tc|THC2693924	GO:0002481|GO:0005886|GO:0015562|GO:0002485|GO:0042626|GO:0055085|GO:0002591|GO:0005524|GO:0030154|GO:0005887|GO:0008152|GO:0042391|GO:0002489|GO:0048058	GO:0042626=ATPase activity, coupled to transmembrane movement of substances|GO:0015562=efflux transmembrane transporter activity|GO:0005524=ATP binding	GO:0005886=plasma membrane|GO:0005887=integral component of plasma membrane	GO:0055085=transmembrane transport|GO:0008152=metabolic process|GO:0002481=antigen processing and presentation of exogenous protein antigen via MHC class Ib, TAP-dependent|GO:0002591=positive regulation of antigen processing and presentation of peptide antigen via MHC class I|GO:0002485=antigen processing and presentation of endogenous peptide antigen via MHC class I via ER pathway, TAP-dependent…	THC2481622	ENST00000258738	Hs.404102	340273
ABCB6	-0.05551	Detected	0.0555105	Detected	4.76e-07	-0.112909	Detected	-0.342209	Detected	-0.227559	0.215943	6140	5720	5360	4190	NM_005689	ref|Homo sapiens ATP-binding cassette, sub-family B (MDR/TAP), member 6 (Langereis blood group) (ABCB6), mRNA [NM_005689]	ATP-binding cassette, sub-family B (MDR/TAP), member 6 (Langereis blood group)	ref|NM_005689|ens|ENST00000443805|ens|ENST00000446716|ens|ENST00000497882	GO:0015886|GO:0015439|GO:0005794|GO:0015562|GO:0005886|GO:0015232|GO:0005783|GO:0005741|GO:0005740|GO:0055085|GO:0005524|GO:0005739|GO:0006879|GO:0006779|GO:0007420|GO:0006810|GO:0043588|GO:0031307|GO:0043190|GO:0070062|GO:0020037|GO:0005768	GO:0015562=efflux transmembrane transporter activity|GO:0015232=heme transporter activity|GO:0020037=heme binding|GO:0005524=ATP binding|GO:0015439=heme-transporting ATPase activity	GO:0005794=Golgi apparatus|GO:0005783=endoplasmic reticulum|GO:0005741=mitochondrial outer membrane|GO:0005740=mitochondrial envelope|GO:0005886=plasma membrane|GO:0031307=integral component of mitochondrial outer membrane|GO:0070062=extracellular exosome|GO:0005768=endosome|GO:0005739=mitochondrion|GO:0043190=ATP-binding cassette (ABC) transporter complex	GO:0055085=transmembrane transport|GO:0007420=brain development|GO:0006810=transport|GO:0043588=skin development|GO:0006879=cellular iron ion homeostasis|GO:0006779=porphyrin-containing compound biosynthetic process|GO:0015886=heme transport	THC2610801	ENST00000443805	Hs.107911	10058
ABCB7	-0.0550754	Detected	0.0550754	Detected	0	-0.019563	Detected	0.24635	Detected	0.113394	0.51329	1160	1080	1080	1190	NM_004299	ref|Homo sapiens ATP-binding cassette, sub-family B (MDR/TAP), member 7 (ABCB7), transcript variant 1, mRNA [NM_004299]	ATP-binding cassette, sub-family B (MDR/TAP), member 7	ref|NM_004299|ref|NM_001271696|ref|NM_001271698|ref|NM_001271699	GO:0006879|GO:0005739|GO:0015886|GO:0015232|GO:0006810|GO:0005743|GO:0042626|GO:0044281|GO:0016021|GO:0055085|GO:0005524	GO:0005524=ATP binding|GO:0042626=ATPase activity, coupled to transmembrane movement of substances|GO:0015232=heme transporter activity	GO:0005739=mitochondrion|GO:0016021=integral component of membrane|GO:0005743=mitochondrial inner membrane	GO:0006879=cellular iron ion homeostasis|GO:0044281=small molecule metabolic process|GO:0055085=transmembrane transport|GO:0006810=transport|GO:0015886=heme transport	THC2632775	ENST00000490858	Hs.370480	22
ABCB8	-0.0543573	Detected	0.0543573	Detected	0	0.0445945	Detected	-0.0987689	Detected	-0.0270872	0.791758	110.609	102.879	107.61	89.2838	NM_007188	ref|Homo sapiens ATP-binding cassette, sub-family B (MDR/TAP), member 8 (ABCB8), transcript variant 2, mRNA [NM_007188]	ATP-binding cassette, sub-family B (MDR/TAP), member 8	ref|NM_007188|ref|NM_001282291|ref|NM_001282292|ref|NM_001282293	GO:0005215|GO:0005730|GO:0005743|GO:0042626|GO:0005634|GO:0005740|GO:0055085|GO:0005524|GO:0005739|GO:0016020|GO:0008152|GO:0006810|GO:0016021|GO:0043190	GO:0042626=ATPase activity, coupled to transmembrane movement of substances|GO:0005215=transporter activity|GO:0005524=ATP binding	GO:0005730=nucleolus|GO:0005740=mitochondrial envelope|GO:0005743=mitochondrial inner membrane|GO:0005634=nucleus|GO:0005739=mitochondrion|GO:0016020=membrane|GO:0016021=integral component of membrane|GO:0043190=ATP-binding cassette (ABC) transporter complex	GO:0055085=transmembrane transport|GO:0008152=metabolic process|GO:0006810=transport	THC2481609	ENST00000482309	Hs.647118	11194
ABCB9	-0.101025	Detected	0.101025	Detected	0	-0.114908	Detected	-0.257242	Detected	-0.186075	0.271082	71.4266	70.8745	64.2623	53.3562	ENST00000537276	ens|ATP-binding cassette, sub-family B (MDR/TAP), member 9 [Source:HGNC Symbol;Acc:HGNC:50] [ENST00000537276]	ATP-binding cassette, sub-family B (MDR/TAP), member 9	ens|ENST00000537276|ens|ENST00000426173|gb|AK027624|gb|AL833963	GO:0005515|GO:0002474|GO:0005783|GO:0030176|GO:0005765|GO:0015031|GO:0055085|GO:0005524|GO:0005764|GO:0042803|GO:0015833|GO:0022891|GO:0008152|GO:0016021|GO:0015440|GO:0005769	GO:0042803=protein homodimerization activity|GO:0015440=peptide-transporting ATPase activity|GO:0005524=ATP binding|GO:0022891=substrate-specific transmembrane transporter activity|GO:0005515=protein binding	GO:0005783=endoplasmic reticulum|GO:0005765=lysosomal membrane|GO:0005764=lysosome|GO:0005769=early endosome|GO:0030176=integral component of endoplasmic reticulum membrane|GO:0016021=integral component of membrane	GO:0055085=transmembrane transport|GO:0015031=protein transport|GO:0008152=metabolic process|GO:0002474=antigen processing and presentation of peptide antigen via MHC class I|GO:0015833=peptide transport	NP1200007	ENST00000542678	Hs.511951	23457
ABCC1	-0.108546	Detected	0.108546	Detected	0	-0.316638	Detected	-0.107376	Detected	-0.212007	0.2949	74.9	75.1	58.9	62.4	NM_004996	ref|Homo sapiens ATP-binding cassette, sub-family C (CFTR/MRP), member 1 (ABCC1), mRNA [NM_004996]	ATP-binding cassette, sub-family C (CFTR/MRP), member 1	ref|NM_004996|ens|ENST00000399410|ens|ENST00000621659|ens|ENST00000399408	GO:0019369|GO:0005215|GO:0009235|GO:0005886|GO:0042493|GO:0042626|GO:0006767|GO:0044281|GO:0055085|GO:0005524|GO:0006691|GO:0016020|GO:0005887|GO:0006766|GO:0006810|GO:0016887|GO:0070062	GO:0016887=ATPase activity|GO:0042626=ATPase activity, coupled to transmembrane movement of substances|GO:0005215=transporter activity|GO:0005524=ATP binding	GO:0005886=plasma membrane|GO:0005887=integral component of plasma membrane|GO:0070062=extracellular exosome|GO:0016020=membrane	GO:0055085=transmembrane transport|GO:0006691=leukotriene metabolic process|GO:0009235=cobalamin metabolic process|GO:0006766=vitamin metabolic process|GO:0006810=transport|GO:0044281=small molecule metabolic process|GO:0006767=water-soluble vitamin metabolic process|GO:0042493=response to drug|GO:0019369=arachidonic acid metabolic process	NP236150	ENST00000399410	Hs.391464	4363
ABCC10	-0.546734	Detected	0.546734	Detected	0	-0.410872	Detected	-0.0203226	Detected	-0.215597	0.746019	46.287	85.1986	46.199	55.4977	NM_033450	ref|Homo sapiens ATP-binding cassette, sub-family C (CFTR/MRP), member 10 (ABCC10), transcript variant MRP7A, mRNA [NM_033450]	ATP-binding cassette, sub-family C (CFTR/MRP), member 10	ref|NM_033450|ref|NM_001198934|ens|ENST00000372512|ens|ENST00000244533	GO:0005886|GO:0008152|GO:0042626|GO:0016021|GO:0005765|GO:0055085|GO:0005524	GO:0005524=ATP binding|GO:0042626=ATPase activity, coupled to transmembrane movement of substances	GO:0016021=integral component of membrane|GO:0005886=plasma membrane|GO:0005765=lysosomal membrane	GO:0055085=transmembrane transport|GO:0008152=metabolic process	THC2470630	ENST00000244533	Hs.55879	89845
ABCC11	0.0455983	Detected	-0.0455983	Detected	0	0.312079	Detected	-0.164722	Detected	0.0736785	0.790137	41	33.2	44.8	29.5	NM_033151	ref|Homo sapiens ATP-binding cassette, sub-family C (CFTR/MRP), member 11 (ABCC11), transcript variant 2, mRNA [NM_033151]	ATP-binding cassette, sub-family C (CFTR/MRP), member 11	ref|NM_033151|ref|NM_032583|ref|NM_145186|ens|ENST00000394747	GO:0005886|GO:0005887|GO:0008152|GO:0015711|GO:0042626|GO:0015216|GO:0008514|GO:0015865|GO:0055085|GO:0005524|GO:0070062	GO:0005524=ATP binding|GO:0042626=ATPase activity, coupled to transmembrane movement of substances|GO:0008514=organic anion transmembrane transporter activity|GO:0015216=purine nucleotide transmembrane transporter activity	GO:0005887=integral component of plasma membrane|GO:0070062=extracellular exosome|GO:0005886=plasma membrane	GO:0055085=transmembrane transport|GO:0008152=metabolic process|GO:0015711=organic anion transport|GO:0015865=purine nucleotide transport	THC2477051	ENST00000394747	Hs.652267	85320
ABCC12	-0.150353	Compromised	0.150353	Compromised	0	0.288376	Compromised	0.499666	Compromised	0.394021	0.165215	1.6	1.7	1.97	2.09	NM_033226	ref|Homo sapiens ATP-binding cassette, sub-family C (CFTR/MRP), member 12 (ABCC12), mRNA [NM_033226]	ATP-binding cassette, sub-family C (CFTR/MRP), member 12	ref|NM_033226|ens|ENST00000497206|ens|ENST00000532494|ens|ENST00000529504	GO:0005739|GO:0008152|GO:0042626|GO:0016021|GO:0055085|GO:0005524	GO:0005524=ATP binding|GO:0042626=ATPase activity, coupled to transmembrane movement of substances	GO:0005739=mitochondrion|GO:0016021=integral component of membrane	GO:0055085=transmembrane transport|GO:0008152=metabolic process	THC2610177	ENST00000497206	Hs.410111	94160
ABCC13	-0.15075	Compromised	0.15075	Compromised	0	0.253175	Compromised	0.453408	Compromised	0.353292	0.19016	1.73859	1.84827	2.08962	2.19998	NR_003087	ref|Homo sapiens ATP-binding cassette, sub-family C (CFTR/MRP), member 13, pseudogene (ABCC13), transcript variant A, non-coding RNA [NR_003087]	ATP-binding cassette, sub-family C (CFTR/MRP), member 13, pseudogene	ref|NR_003087|ens|ENST00000467409|gb|AY063514|tc|THC2479122	GO:0042626|GO:0016021|GO:0055085|GO:0005524	GO:0005524=ATP binding|GO:0042626=ATPase activity, coupled to transmembrane movement of substances	GO:0016021=integral component of membrane	GO:0055085=transmembrane transport	THC2479122	ENST00000467409	Hs.366575	150000
ABCC2	-0.416526	Detected	0.416526	Detected	0	-1.31873	Compromised	-1.13195	Compromised	-1.22534	0.102957	8.59	13.2	4.17521	4.35493	ENST00000370434	ens|ATP-binding cassette, sub-family C (CFTR/MRP), member 2 [Source:HGNC Symbol;Acc:HGNC:53] [ENST00000370434]	ATP-binding cassette, sub-family C (CFTR/MRP), member 2	ens|ENST00000370434|gb|U66683|tc|THC2720169	GO:0005515|GO:0046685|GO:0043627|GO:0005886|GO:0009408|GO:0009986|GO:0031427|GO:0019904|GO:0042626|GO:0070327|GO:0055085|GO:0005524|GO:0046581|GO:0016324|GO:0030644|GO:0015732|GO:0005887|GO:0006855|GO:0008152|GO:0006810|GO:0008514|GO:0006979	GO:0019904=protein domain specific binding|GO:0042626=ATPase activity, coupled to transmembrane movement of substances|GO:0008514=organic anion transmembrane transporter activity|GO:0005524=ATP binding|GO:0005515=protein binding	GO:0005886=plasma membrane|GO:0009986=cell surface|GO:0046581=intercellular canaliculus|GO:0005887=integral component of plasma membrane|GO:0016324=apical plasma membrane	GO:0043627=response to estrogen|GO:0055085=transmembrane transport|GO:0008152=metabolic process|GO:0006810=transport|GO:0006979=response to oxidative stress|GO:0009408=response to heat|GO:0006855=drug transmembrane transport|GO:0031427=response to methotrexate|GO:0046685=response to arsenic-containing substance|GO:0030644=cellular chloride ion homeostasis|GO:0070327=thyroid hormone transport|GO:0…	THC2472036	ENST00000370449	Hs.368243	1244
ABCC3	0.143943	Detected	-0.143943	Detected	0	-0.0205605	Detected	-0.0322993	Detected	-0.0264299	0.871351	506.754	358.049	410.726	373.331	NM_001144070	ref|Homo sapiens ATP-binding cassette, sub-family C (CFTR/MRP), member 3 (ABCC3), transcript variant 2, mRNA [NM_001144070]	ATP-binding cassette, sub-family C (CFTR/MRP), member 3	ref|NM_001144070|ens|ENST00000427699|gb|BC046126|gb|BC050370	GO:0016020|GO:0005886|GO:0005887|GO:0015721|GO:0006810|GO:0042626|GO:0008514|GO:0008206|GO:0044281|GO:0055085|GO:0005524	GO:0005524=ATP binding|GO:0042626=ATPase activity, coupled to transmembrane movement of substances|GO:0008514=organic anion transmembrane transporter activity	GO:0005887=integral component of plasma membrane|GO:0016020=membrane|GO:0005886=plasma membrane	GO:0044281=small molecule metabolic process|GO:0055085=transmembrane transport|GO:0006810=transport|GO:0008206=bile acid metabolic process|GO:0015721=bile acid and bile salt transport	THC2482842	ENST00000503337	Hs.463421	8714
ABCC4	-0.379024	Compromised	0.379024	Compromised	0	0.499937	Compromised	0.283528	Compromised	0.391733	0.425034	3.4	4.96	5.68	4.48	NM_005845	ref|Homo sapiens ATP-binding cassette, sub-family C (CFTR/MRP), member 4 (ABCC4), transcript variant 1, mRNA [NM_005845]	ATP-binding cassette, sub-family C (CFTR/MRP), member 4	ref|NM_005845|ref|NM_001105515|ref|NM_001301830|ref|NM_001301829	GO:0014070|GO:0031088|GO:0005886|GO:0042493|GO:0042626|GO:0010243|GO:0030168|GO:0055085|GO:0048661|GO:0005524|GO:0008150|GO:0016323|GO:0016020|GO:0007596|GO:0002576|GO:0016021|GO:0055114|GO:0016404	GO:0016404=15-hydroxyprostaglandin dehydrogenase (NAD+) activity|GO:0042626=ATPase activity, coupled to transmembrane movement of substances|GO:0005524=ATP binding	GO:0005886=plasma membrane|GO:0016020=membrane|GO:0016021=integral component of membrane|GO:0031088=platelet dense granule membrane|GO:0016323=basolateral plasma membrane	GO:0008150=biological_process|GO:0055085=transmembrane transport|GO:0014070=response to organic cyclic compound|GO:0007596=blood coagulation|GO:0048661=positive regulation of smooth muscle cell proliferation|GO:0002576=platelet degranulation|GO:0042493=response to drug|GO:0055114=oxidation-reduction process|GO:0010243=response to organonitrogen compound|GO:0030168=platelet activation	NP650495	ENST00000376887	Hs.508423	10257
ABCC5	0.146304	Detected	-0.146304	Detected	0	-0.239898	Detected	-0.0438135	Detected	-0.141856	0.505092	603.579	425.067	419.518	440.406	NM_005688	ref|Homo sapiens ATP-binding cassette, sub-family C (CFTR/MRP), member 5 (ABCC5), transcript variant 1, mRNA [NM_005688]	ATP-binding cassette, sub-family C (CFTR/MRP), member 5	ref|NM_005688|ens|ENST00000437205|ens|ENST00000265586|ens|ENST00000334444	GO:0005886|GO:0005975|GO:0042626|GO:0044281|GO:0055085|GO:0005524|GO:0016020|GO:0005887|GO:0006810|GO:0009405|GO:0015711|GO:0030213|GO:0030212|GO:0008514|GO:0030203	GO:0042626=ATPase activity, coupled to transmembrane movement of substances|GO:0008514=organic anion transmembrane transporter activity|GO:0005524=ATP binding	GO:0005886=plasma membrane|GO:0005887=integral component of plasma membrane|GO:0016020=membrane	GO:0055085=transmembrane transport|GO:0006810=transport|GO:0009405=pathogenesis|GO:0044281=small molecule metabolic process|GO:0005975=carbohydrate metabolic process|GO:0030213=hyaluronan biosynthetic process|GO:0030212=hyaluronan metabolic process|GO:0015711=organic anion transport|GO:0030203=glycosaminoglycan metabolic process	NP086323	ENST00000437205	Hs.743953	10057
ABCC5-AS1	0.0350656	Detected	-0.0350656	Detected	0	-0.0750084	Detected	-0.244416	Detected	-0.159712	0.223605	120	98.6	101	82.3	NR_046570	ref|Homo sapiens ABCC5 antisense RNA 1 (ABCC5-AS1), long non-coding RNA [NR_046570]	ABCC5 antisense RNA 1	ref|NR_046570|linc|lnc-HTR3D-1:1|tc|THC2649410					THC2649410		Hs.570696	100873982
ABCC6	0.505647	Detected	-0.505647	Detected	0	0.468781	Detected	0.586074	Detected	0.527427	0.408993	154.756	66.2253	137.033	136.21	NM_001079528	ref|Homo sapiens ATP-binding cassette, sub-family C (CFTR/MRP), member 6 (ABCC6), transcript variant 2, mRNA [NM_001079528]	ATP-binding cassette, sub-family C (CFTR/MRP), member 6	ref|NM_001079528|ens|ENST00000565118|gb|BC050733|tc|THC2474680	GO:0005215|GO:0005886|GO:0006200|GO:0042493|GO:0042626|GO:0005634|GO:0055085|GO:0005524|GO:0016328|GO:0016323|GO:0016324|GO:0005789|GO:0006810|GO:0016021|GO:0007601	GO:0042626=ATPase activity, coupled to transmembrane movement of substances|GO:0005215=transporter activity|GO:0005524=ATP binding	GO:0016328=lateral plasma membrane|GO:0005886=plasma membrane|GO:0005789=endoplasmic reticulum membrane|GO:0005634=nucleus|GO:0016021=integral component of membrane|GO:0016323=basolateral plasma membrane|GO:0016324=apical plasma membrane	GO:0055085=transmembrane transport|GO:0007601=visual perception|GO:0006810=transport|GO:0042493=response to drug	THC2480873	ENST00000576204	Hs.442182	368
ABCC6P1	0.494656	Detected	-0.494656	Compromised	-2.5e-07	-1.31098	Compromised	2.29365	Detected	0.491336	0.817238	9.39	4.08	2.44	27.2	NR_003569	ref|Homo sapiens ATP-binding cassette, sub-family C, member 6 pseudogene 1 (functional) (ABCC6P1), non-coding RNA [NR_003569]	ATP-binding cassette, sub-family C, member 6 pseudogene 1 (functional)	ref|NR_003569|ens|ENST00000546162|gb|BC075833|tc|THC2606670					THC2606670	ENST00000546162	Hs.13188	653190
ABCC8	0.0971301	Detected	-0.0971301	Detected	0	-0.521514	Detected	-0.244166	Detected	-0.38284	0.152162	38.2	28.8	22.6	25.1	NM_000352	ref|Homo sapiens ATP-binding cassette, sub-family C (CFTR/MRP), member 8 (ABCC8), transcript variant 2, mRNA [NM_000352]	ATP-binding cassette, sub-family C (CFTR/MRP), member 8	ref|NM_000352|ref|NM_001287174|ens|ENST00000525022|ens|ENST00000526168	GO:0015079|GO:0005886|GO:0005975|GO:0008281|GO:0007268|GO:0042626|GO:0044281|GO:0055085|GO:0005524|GO:0044325|GO:0007165|GO:0006112|GO:0050796|GO:0008076|GO:0006813|GO:0071805	GO:0008281=sulfonylurea receptor activity|GO:0042626=ATPase activity, coupled to transmembrane movement of substances|GO:0015079=potassium ion transmembrane transporter activity|GO:0044325=ion channel binding|GO:0005524=ATP binding	GO:0008076=voltage-gated potassium channel complex|GO:0005886=plasma membrane	GO:0055085=transmembrane transport|GO:0071805=potassium ion transmembrane transport|GO:0007165=signal transduction|GO:0006112=energy reserve metabolic process|GO:0007268=synaptic transmission|GO:0044281=small molecule metabolic process|GO:0006813=potassium ion transport|GO:0005975=carbohydrate metabolic process|GO:0050796=regulation of insulin secretion	THC2461348	ENST00000525022	Hs.54470	6833
ABCC9	-0.0550184	Compromised	0.055018	Compromised	-4.75e-07	0.164228	Compromised	0.385929	Compromised	0.275079	0.156287	1.85817	1.72988	1.96499	2.09979	NM_005691	ref|Homo sapiens ATP-binding cassette, sub-family C (CFTR/MRP), member 9 (ABCC9), transcript variant SUR2A, mRNA [NM_005691]	ATP-binding cassette, sub-family C (CFTR/MRP), member 9	ref|NM_005691|ref|NM_020297|ens|ENST00000621589|ens|ENST00000261201	GO:0005215|GO:0005886|GO:0008282|GO:0008281|GO:0042626|GO:0005267|GO:0007268|GO:0010107|GO:0015459|GO:0055085|GO:0030017|GO:0005524|GO:0044325|GO:0042383|GO:0007165|GO:0051607|GO:0008076|GO:0008152|GO:0006813	GO:0008281=sulfonylurea receptor activity|GO:0042626=ATPase activity, coupled to transmembrane movement of substances|GO:0005267=potassium channel activity|GO:0044325=ion channel binding|GO:0005215=transporter activity|GO:0005524=ATP binding|GO:0015459=potassium channel regulator activity	GO:0008282=ATP-sensitive potassium channel complex|GO:0008076=voltage-gated potassium channel complex|GO:0005886=plasma membrane|GO:0042383=sarcolemma|GO:0030017=sarcomere	GO:0055085=transmembrane transport|GO:0007165=signal transduction|GO:0008152=metabolic process|GO:0007268=synaptic transmission|GO:0006813=potassium ion transport|GO:0051607=defense response to virus|GO:0010107=potassium ion import	NP274082	ENST00000261201	Hs.732701	10060
ABCD1	-0.833347	Detected	0.833347	Detected	0	-0.410619	Detected	0.817664	Detected	0.203522	0.862306	28.9562	79.3	35.259	75.7	NM_000033	ref|Homo sapiens ATP-binding cassette, sub-family D (ALD), member 1 (ABCD1), mRNA [NM_000033]	ATP-binding cassette, sub-family D (ALD), member 1	ref|NM_000033|ens|ENST00000429313|ens|ENST00000218104|ens|ENST00000399687	GO:0005515|GO:0005215|GO:0048471|GO:0042626|GO:0044281|GO:0042803|GO:0005829|GO:0042802|GO:0015910|GO:0005739|GO:0005737|GO:0007031|GO:0015919|GO:0005779|GO:0016887|GO:0044255|GO:0005778|GO:0042760|GO:0005777|GO:0006635|GO:0005325|GO:0036109|GO:0055085|GO:0005524|GO:0043651|GO:0033559|GO:0016020|GO:0042758|GO:0033540|GO:0019899	GO:0016887=ATPase activity|GO:0005215=transporter activity|GO:0005524=ATP binding|GO:0042626=ATPase activity, coupled to transmembrane movement of substances|GO:0042802=identical protein binding|GO:0042803=protein homodimerization activity|GO:0005325=peroxisomal fatty-acyl-CoA transporter activity|GO:0005515=protein binding|GO:0019899=enzyme binding	GO:0005829=cytosol|GO:0005778=peroxisomal membrane|GO:0005777=peroxisome|GO:0048471=perinuclear region of cytoplasm|GO:0005779=integral component of peroxisomal membrane|GO:0005737=cytoplasm|GO:0005739=mitochondrion|GO:0016020=membrane	GO:0042758=long-chain fatty acid catabolic process|GO:0033540=fatty acid beta-oxidation using acyl-CoA oxidase|GO:0007031=peroxisome organization|GO:0044255=cellular lipid metabolic process|GO:0044281=small molecule metabolic process|GO:0006635=fatty acid beta-oxidation|GO:0036109=alpha-linolenic acid metabolic process|GO:0033559=unsaturated fatty acid metabolic process|GO:0055085=transmembrane t…	THC2462247	ENST00000218104	Hs.159546	215
ABCD2	-0.121889	Compromised	0.121889	Compromised	0	0.257724	Compromised	1.7582	Compromised	1.00796	0.315974	1.87	1.91	2.21	5.73	NM_005164	ref|Homo sapiens ATP-binding cassette, sub-family D (ALD), member 2 (ABCD2), mRNA [NM_005164]	ATP-binding cassette, sub-family D (ALD), member 2	ref|NM_005164|gb|AJ000327|tc|THC2476335	GO:0005515|GO:0000038|GO:0006635|GO:0042626|GO:0055085|GO:0005524|GO:0042803|GO:0043231|GO:0005829|GO:0005739|GO:0032000|GO:0016021|GO:0005778|GO:0042760|GO:0005777	GO:0042626=ATPase activity, coupled to transmembrane movement of substances|GO:0042803=protein homodimerization activity|GO:0005524=ATP binding|GO:0005515=protein binding	GO:0005778=peroxisomal membrane|GO:0005777=peroxisome|GO:0043231=intracellular membrane-bounded organelle|GO:0005739=mitochondrion|GO:0016021=integral component of membrane|GO:0005829=cytosol	GO:0055085=transmembrane transport|GO:0032000=positive regulation of fatty acid beta-oxidation|GO:0042760=very long-chain fatty acid catabolic process|GO:0000038=very long-chain fatty acid metabolic process|GO:0006635=fatty acid beta-oxidation	THC2476335	ENST00000308666	Hs.117852	225
ABCD3	-0.0654116	Detected	0.0654116	Detected	0	-0.305373	Detected	-0.247107	Detected	-0.27624	0.0610995	119.729	113.08	92.0956	87.8727	NM_001122674	ref|Homo sapiens ATP-binding cassette, sub-family D (ALD), member 3 (ABCD3), transcript variant 2, mRNA [NM_001122674]	ATP-binding cassette, sub-family D (ALD), member 3	ref|NM_001122674|ens|ENST00000315713|gb|BC009712|tc|THC2486920	GO:0005515|GO:0006635|GO:0005782|GO:0005743|GO:0042626|GO:0055085|GO:0005524|GO:0042803|GO:0043231|GO:0005829|GO:0016020|GO:0007031|GO:0016021|GO:0016887|GO:0042760|GO:0005778|GO:0005777	GO:0016887=ATPase activity|GO:0042626=ATPase activity, coupled to transmembrane movement of substances|GO:0042803=protein homodimerization activity|GO:0005524=ATP binding|GO:0005515=protein binding	GO:0005782=peroxisomal matrix|GO:0005743=mitochondrial inner membrane|GO:0005778=peroxisomal membrane|GO:0005777=peroxisome|GO:0043231=intracellular membrane-bounded organelle|GO:0016020=membrane|GO:0016021=integral component of membrane|GO:0005829=cytosol	GO:0055085=transmembrane transport|GO:0007031=peroxisome organization|GO:0042760=very long-chain fatty acid catabolic process|GO:0006635=fatty acid beta-oxidation	THC2486920	ENST00000315713	Hs.700576	5825
ABCD4	0.0867398	Detected	-0.0867398	Detected	0	-0.0628626	Detected	0.393595	Detected	0.165366	0.56806	370	283	303	381	AK125109	gb|Homo sapiens cDNA FLJ43119 fis, clone CTONG3003179. [AK125109]	ATP-binding cassette, sub-family D (ALD), member 4	gb|AK125109|tc|THC2523786	GO:0009235|GO:0006767|GO:0042626|GO:0044281|GO:0005765|GO:0005524|GO:0055085|GO:0006766|GO:0005789|GO:0016021|GO:0043190|GO:0005778|GO:0005777	GO:0042626=ATPase activity, coupled to transmembrane movement of substances|GO:0005524=ATP binding	GO:0005765=lysosomal membrane|GO:0005789=endoplasmic reticulum membrane|GO:0005778=peroxisomal membrane|GO:0005777=peroxisome|GO:0016021=integral component of membrane|GO:0043190=ATP-binding cassette (ABC) transporter complex	GO:0055085=transmembrane transport|GO:0009235=cobalamin metabolic process|GO:0006766=vitamin metabolic process|GO:0044281=small molecule metabolic process|GO:0006767=water-soluble vitamin metabolic process	THC2548714	ENST00000484380		5826
ABCE1	0.105334	Detected	-0.105334	Detected	0	-0.206846	Detected	0.326079	Detected	0.0596163	0.854442	941.981	702.154	689.195	913.785	NM_002940	ref|Homo sapiens ATP-binding cassette, sub-family E (OABP), member 1 (ABCE1), transcript variant 1, mRNA [NM_002940]	ATP-binding cassette, sub-family E (OABP), member 1	ref|NM_002940|ref|NM_001040876|ens|ENST00000296577|gb|BC016988	GO:0005739|GO:0005737|GO:0051536|GO:0016020|GO:0008428|GO:0016032|GO:0009615|GO:0043086|GO:0016887|GO:0005524|GO:0006401	GO:0016887=ATPase activity|GO:0005524=ATP binding|GO:0008428=ribonuclease inhibitor activity|GO:0051536=iron-sulfur cluster binding	GO:0005737=cytoplasm|GO:0005739=mitochondrion|GO:0016020=membrane	GO:0043086=negative regulation of catalytic activity|GO:0016032=viral process|GO:0009615=response to virus|GO:0006401=RNA catabolic process	THC2469886	ENST00000296577	Hs.12013	6059
ABCF1	-0.0389762	Detected	0.0389767	Detected	4.78e-07	0.0959349	Detected	-0.454675	Detected	-0.17937	0.584984	3910	3560	3900	2440	NM_001025091	ref|Homo sapiens ATP-binding cassette, sub-family F (GCN20), member 1 (ABCF1), transcript variant 1, mRNA [NM_001025091]	ATP-binding cassette, sub-family F (GCN20), member 1	ref|NM_001025091|ref|NM_001090|ens|ENST00000376545|ens|ENST00000383588	GO:0005515|GO:0042254|GO:0045727|GO:0008494|GO:0005635|GO:0005524|GO:0006412|GO:0006413|GO:0005737|GO:0006954|GO:0016020|GO:0042788|GO:0043022|GO:0005840|GO:0005654|GO:0016887|GO:0008135	GO:0016887=ATPase activity|GO:0008494=translation activator activity|GO:0008135=translation factor activity, RNA binding|GO:0005524=ATP binding|GO:0005515=protein binding|GO:0043022=ribosome binding	GO:0005840=ribosome|GO:0042788=polysomal ribosome|GO:0005654=nucleoplasm|GO:0005635=nuclear envelope|GO:0005737=cytoplasm|GO:0016020=membrane	GO:0045727=positive regulation of translation|GO:0042254=ribosome biogenesis|GO:0006413=translational initiation|GO:0006412=translation|GO:0006954=inflammatory response	NP1176940	ENST00000376545	Hs.655285	23
ABCF2	-0.0821669	Detected	0.0821669	Detected	0	0.0370734	Detected	-0.373972	Detected	-0.168449	0.526119	1500	1450	1480	1020	NM_005692	ref|Homo sapiens ATP-binding cassette, sub-family F (GCN20), member 2 (ABCF2), transcript variant 2, mRNA [NM_005692]	ATP-binding cassette, sub-family F (GCN20), member 2	ref|NM_005692|ens|ENST00000222388|ens|ENST00000465687|ref|XM_005249931	GO:0005215|GO:0016020|GO:0008152|GO:0006810|GO:0005740|GO:0043190|GO:0016887|GO:0005524	GO:0016887=ATPase activity|GO:0005524=ATP binding|GO:0005215=transporter activity	GO:0016020=membrane|GO:0005740=mitochondrial envelope|GO:0043190=ATP-binding cassette (ABC) transporter complex	GO:0008152=metabolic process|GO:0006810=transport	THC2619700	ENST00000222388	Hs.654958	10061
ABCF3	-0.0816741	Detected	0.0816736	Detected	-4.8e-07	0.15565	Detected	-0.0957336	Detected	0.0299582	0.860068	3530	3410	3780	2910	NM_018358	ref|Homo sapiens ATP-binding cassette, sub-family F (GCN20), member 3 (ABCF3), mRNA [NM_018358]	ATP-binding cassette, sub-family F (GCN20), member 3	ref|NM_018358|ens|ENST00000468892|ens|ENST00000292808|ens|ENST00000466742	GO:0051607|GO:0016020|GO:0008152|GO:0016887|GO:0005524	GO:0016887=ATPase activity|GO:0005524=ATP binding	GO:0016020=membrane	GO:0008152=metabolic process|GO:0051607=defense response to virus	THC2763523	ENST00000468892	Hs.361323	55324
ABCG1	0.0910051	Detected	-0.0910051	Detected	0	-0.0758712	Detected	-0.394233	Detected	-0.235052	0.328396	676	514	547	402	NM_207627	ref|Homo sapiens ATP-binding cassette, sub-family G (WHITE), member 1 (ABCG1), transcript variant 5, mRNA [NM_207627]	ATP-binding cassette, sub-family G (WHITE), member 1	ref|NM_207627|ref|NM_207628|ref|NM_004915|ref|NM_207174	GO:0005515|GO:0019534|GO:0005886|GO:0033993|GO:0017127|GO:0010872|GO:0044281|GO:0042803|GO:0010875|GO:0043231|GO:0005739|GO:0005543|GO:0015485|GO:0046983|GO:0009720|GO:0008203|GO:0042987|GO:0042632|GO:0033344|GO:0006355|GO:0005794|GO:0010033|GO:0046982|GO:0010745|GO:0043691|GO:0005548|GO:0055085|GO:0005524|GO:0010887|GO:0055099|GO:0033700|GO:0043531|GO:0034374|GO:0000139|GO:0005887|GO:0034041|GO:…	GO:0005524=ATP binding|GO:0005548=phospholipid transporter activity|GO:0046982=protein heterodimerization activity|GO:0017127=cholesterol transporter activity|GO:0034041=sterol-transporting ATPase activity|GO:0042803=protein homodimerization activity|GO:0015485=cholesterol binding|GO:0046983=protein dimerization activity|GO:0043531=ADP binding|GO:0005543=phospholipid binding|GO:0005515=protein bi…	GO:0009897=external side of plasma membrane|GO:0005794=Golgi apparatus|GO:0000139=Golgi membrane|GO:0005654=nucleoplasm|GO:0005789=endoplasmic reticulum membrane|GO:0005887=integral component of plasma membrane|GO:0005768=endosome|GO:0043231=intracellular membrane-bounded organelle|GO:0005886=plasma membrane|GO:0005739=mitochondrion|GO:0055037=recycling endosome	GO:0034375=high-density lipoprotein particle remodeling|GO:0055099=response to high density lipoprotein particle|GO:0034374=low-density lipoprotein particle remodeling|GO:0008203=cholesterol metabolic process|GO:0045542=positive regulation of cholesterol biosynthetic process|GO:0042157=lipoprotein metabolic process|GO:0042632=cholesterol homeostasis|GO:0055091=phospholipid homeostasis|GO:0044281=…	THC2463214	ENST00000398437	Hs.124649	9619
ABCG2	0.88152	Compromised	-0.88152	Compromised	5e-07	-0.765475	Compromised	0.553153	Compromised	-0.106161	0.931965	7.24	1.84	2.1	4.8	NM_004827	ref|Homo sapiens ATP-binding cassette, sub-family G (WHITE), member 2 (Junior blood group) (ABCG2), transcript variant 1, mRNA [NM_004827]	ATP-binding cassette, sub-family G (WHITE), member 2 (Junior blood group)	ref|NM_004827|ref|NM_001257386|ens|ENST00000237612|ens|ENST00000515655	GO:0005515|GO:0005215|GO:0015886|GO:0031966|GO:0005886|GO:0015232|GO:0042493|GO:0042626|GO:0042908|GO:0005634|GO:0044281|GO:0046415|GO:0055085|GO:0005524|GO:0042803|GO:0006879|GO:0008559|GO:0006855|GO:0006810|GO:0005654|GO:0016021	GO:0042626=ATPase activity, coupled to transmembrane movement of substances|GO:0042803=protein homodimerization activity|GO:0015232=heme transporter activity|GO:0008559=xenobiotic-transporting ATPase activity|GO:0005215=transporter activity|GO:0005524=ATP binding|GO:0005515=protein binding	GO:0005886=plasma membrane|GO:0005654=nucleoplasm|GO:0005634=nucleus|GO:0031966=mitochondrial membrane|GO:0016021=integral component of membrane	GO:0055085=transmembrane transport|GO:0006810=transport|GO:0046415=urate metabolic process|GO:0044281=small molecule metabolic process|GO:0006879=cellular iron ion homeostasis|GO:0006855=drug transmembrane transport|GO:0042493=response to drug|GO:0042908=xenobiotic transport|GO:0015886=heme transport	THC2478592	ENST00000237612	Hs.480218	9429
ABCG4	0.122193	Detected	-0.122193	Compromised	0	-1.04807	Compromised	0.113216	Compromised	-0.467429	0.513372	11	8.01	4.44	9.1	NM_022169	ref|Homo sapiens ATP-binding cassette, sub-family G (WHITE), member 4 (ABCG4), transcript variant 1, mRNA [NM_022169]	ATP-binding cassette, sub-family G (WHITE), member 4	ref|NM_022169|ref|NM_001142505|ens|ENST00000619701|gb|AJ308237	GO:0005515|GO:0033344|GO:0046982|GO:0005886|GO:0017127|GO:0008152|GO:0016021|GO:0055085|GO:0016887|GO:0005524|GO:0042803	GO:0016887=ATPase activity|GO:0005524=ATP binding|GO:0005515=protein binding|GO:0042803=protein homodimerization activity|GO:0046982=protein heterodimerization activity|GO:0017127=cholesterol transporter activity	GO:0016021=integral component of membrane|GO:0005886=plasma membrane	GO:0055085=transmembrane transport|GO:0008152=metabolic process|GO:0033344=cholesterol efflux	THC2474895	ENST00000619701	Hs.126378	64137
ABCG5	-0.819457	Compromised	0.819457	Compromised	0	0.583605	Compromised	-0.187563	Compromised	0.198021	0.847204	1.69	4.54	4.06	2.18	NM_022436	ref|Homo sapiens ATP-binding cassette, sub-family G (WHITE), member 5 (ABCG5), mRNA [NM_022436]	ATP-binding cassette, sub-family G (WHITE), member 5	ref|NM_022436|ens|ENST00000409962|ens|ENST00000486512|ens|ENST00000260645	GO:0042632|GO:0005515|GO:0007588|GO:0033344|GO:0046982|GO:0005886|GO:0007584|GO:0042493|GO:0017127|GO:0044281|GO:0055085|GO:0045796|GO:0005524|GO:0043235|GO:0030299|GO:0016324|GO:0010212|GO:0010949|GO:0015918|GO:0043190|GO:0016887	GO:0016887=ATPase activity|GO:0005524=ATP binding|GO:0005515=protein binding|GO:0046982=protein heterodimerization activity|GO:0017127=cholesterol transporter activity	GO:0043235=receptor complex|GO:0005886=plasma membrane|GO:0016324=apical plasma membrane|GO:0043190=ATP-binding cassette (ABC) transporter complex	GO:0055085=transmembrane transport|GO:0007584=response to nutrient|GO:0045796=negative regulation of intestinal cholesterol absorption|GO:0042632=cholesterol homeostasis|GO:0007588=excretion|GO:0044281=small molecule metabolic process|GO:0010949=negative regulation of intestinal phytosterol absorption|GO:0015918=sterol transport|GO:0042493=response to drug|GO:0033344=cholesterol efflux|GO:0030299…	NP1147378	ENST00000409962	Hs.132992	64240
ABCG8	0.0409613	Compromised	-0.0409613	Compromised	0	2.14092	Compromised	0.247186	Compromised	1.19405	0.334811	2.27	1.85	8.84	2.18	NM_022437	ref|Homo sapiens ATP-binding cassette, sub-family G (WHITE), member 8 (ABCG8), mRNA [NM_022437]	ATP-binding cassette, sub-family G (WHITE), member 8	ref|NM_022437|ens|ENST00000272286|ref|XM_006712075|ref|XM_005264483	GO:0042632|GO:0005515|GO:0007588|GO:0033344|GO:0046982|GO:0005886|GO:0007584|GO:0042493|GO:0017127|GO:0044281|GO:0055085|GO:0045796|GO:0005524|GO:0043235|GO:0030299|GO:0016324|GO:0015914|GO:0010949|GO:0015918|GO:0043190|GO:0016887	GO:0016887=ATPase activity|GO:0005524=ATP binding|GO:0005515=protein binding|GO:0046982=protein heterodimerization activity|GO:0017127=cholesterol transporter activity	GO:0043235=receptor complex|GO:0005886=plasma membrane|GO:0016324=apical plasma membrane|GO:0043190=ATP-binding cassette (ABC) transporter complex	GO:0055085=transmembrane transport|GO:0007584=response to nutrient|GO:0045796=negative regulation of intestinal cholesterol absorption|GO:0042632=cholesterol homeostasis|GO:0007588=excretion|GO:0044281=small molecule metabolic process|GO:0010949=negative regulation of intestinal phytosterol absorption|GO:0015918=sterol transport|GO:0042493=response to drug|GO:0015914=phospholipid transport|GO:003…	THC2481118	ENST00000272286	Hs.413931	64241
ABHD1	0.0180385	Detected	-0.0180385	Detected	0	-0.13918	Detected	0.280599	Detected	0.0707095	0.769074	71.2	59.9	58	71.1	NM_032604	ref|Homo sapiens abhydrolase domain containing 1 (ABHD1), mRNA [NM_032604]	abhydrolase domain containing 1	ref|NM_032604|ens|ENST00000489120|ens|ENST00000316470|ens|ENST00000448950	GO:0052689|GO:0008150|GO:0003674|GO:0008152|GO:0016021	GO:0052689=carboxylic ester hydrolase activity|GO:0003674=molecular_function	GO:0016021=integral component of membrane	GO:0008150=biological_process|GO:0008152=metabolic process	THC2487978	ENST00000489120	Hs.375791	84696
ABHD10	-0.148818	Compromised	0.148818	Compromised	-4.8e-07	0.287173	Compromised	0.508915	Compromised	0.398044	0.165138	1.66	1.76	2.04	2.18	NM_018394	ref|Homo sapiens abhydrolase domain containing 10 (ABHD10), transcript variant 1, mRNA [NM_018394]	abhydrolase domain containing 10	ref|NM_018394|ref|NM_001272069|ref|NR_073570|ref|NR_073571	GO:0005739|GO:0019391|GO:0004553|GO:0005829	GO:0004553=hydrolase activity, hydrolyzing O-glycosyl compounds	GO:0005739=mitochondrion|GO:0005829=cytosol	GO:0019391=glucuronoside catabolic process	THC2467493	ENST00000273359	Hs.477115	55347
ABHD11	-0.0266185	Detected	0.026619	Detected	4.78e-07	-0.0971231	Detected	-0.378284	Detected	-0.237704	0.238528	3803.08	3403.84	3289.93	2480.99	NM_001301058	ref|Homo sapiens abhydrolase domain containing 11 (ABHD11), transcript variant 9, mRNA [NM_001301058]	abhydrolase domain containing 11	ref|NM_001301058|ref|NM_001145364|ref|NM_148912|ref|NM_148913	GO:0005739|GO:0008150|GO:0003674|GO:0016787|GO:0008152|GO:0005575	GO:0003674=molecular_function|GO:0016787=hydrolase activity	GO:0005739=mitochondrion|GO:0005575=cellular_component	GO:0008150=biological_process|GO:0008152=metabolic process	THC2483689	ENST00000497897	Hs.647045	83451
ABHD11-AS1	-0.159477	Detected	0.159477	Detected	0	-0.190796	Detected	-0.113068	Detected	-0.151932	0.452367	17.1	18.4	15.2	14.7	NR_026690	ref|Homo sapiens ABHD11 antisense RNA 1 (tail to tail) (ABHD11-AS1), long non-coding RNA [NR_026690]	ABHD11 antisense RNA 1 (tail to tail)	ref|NR_026690|linc|lnc-WBSCR22-1:1|gb|BU595969							Hs.650513	171022
ABHD12	0.0978162	Detected	-0.0978162	Detected	0	0.0869315	Detected	-0.643782	Detected	-0.278425	0.538278	701	528	632	349	NM_015600	ref|Homo sapiens abhydrolase domain containing 12 (ABHD12), transcript variant 2, mRNA [NM_015600]	abhydrolase domain containing 12	ref|NM_015600|ref|NM_001042472|ens|ENST00000481556|ens|ENST00000376542	GO:0006660|GO:0010996|GO:0032281|GO:0047372|GO:0007628	GO:0047372=acylglycerol lipase activity	GO:0032281=AMPA glutamate receptor complex	GO:0007628=adult walking behavior|GO:0010996=response to auditory stimulus|GO:0006660=phosphatidylserine catabolic process	THC2526851	ENST00000481556	Hs.441550	26090
ABHD12B	0.0402384	Compromised	-0.0402384	Compromised	0	0.100858	Compromised	0.345427	Compromised	0.223143	0.225172	2.08998	1.70499	1.98	2.14963	NM_001206673	ref|Homo sapiens abhydrolase domain containing 12B (ABHD12B), transcript variant 1, mRNA [NM_001206673]	abhydrolase domain containing 12B	ref|NM_001206673|ref|NM_181814|ens|ENST00000382029|ens|ENST00000557345	GO:0016787|GO:0008152	GO:0016787=hydrolase activity		GO:0008152=metabolic process	NP820221	ENST00000554566	Hs.271896	145447
ABHD13	0.282182	Detected	-0.282182	Compromised	0	0.0374587	Compromised	0.249385	Compromised	0.143422	0.681111	10.2	5.95	7.82	8.3	NM_032859	ref|Homo sapiens abhydrolase domain containing 13 (ABHD13), mRNA [NM_032859]	abhydrolase domain containing 13	ref|NM_032859|ens|ENST00000375898|gb|BX647428|gb|BC018608	GO:0016787|GO:0016020|GO:0008152|GO:0016021	GO:0016787=hydrolase activity	GO:0016020=membrane|GO:0016021=integral component of membrane	GO:0008152=metabolic process	THC2601478	ENST00000375898	Hs.183528	84945
ABHD14A	-0.00623727	Detected	0.00623727	Detected	0	-0.127866	Detected	-0.079828	Detected	-0.103847	0.0526349	430.205	374.315	359.2	340.309	NM_015407	ref|Homo sapiens abhydrolase domain containing 14A (ABHD14A), mRNA [NM_015407]	abhydrolase domain containing 14A	ref|NM_015407|ens|ENST00000273596|ens|ENST00000458031|gb|BC002571	GO:0005737|GO:0016787|GO:0008152|GO:0016021|GO:0070062	GO:0016787=hydrolase activity	GO:0070062=extracellular exosome|GO:0005737=cytoplasm|GO:0016021=integral component of membrane	GO:0008152=metabolic process	THC2471728	ENST00000273596	Hs.534400	25864
ABHD14B	-0.0285623	Detected	0.0285623	Detected	0	0.123849	Detected	-0.101008	Detected	0.0114202	0.930553	312	280	315	247	NM_032750	ref|Homo sapiens abhydrolase domain containing 14B (ABHD14B), transcript variant 1, mRNA [NM_032750]	abhydrolase domain containing 14B	ref|NM_032750|ref|NM_001146314|ref|NM_001254753|ens|ENST00000361143	GO:0005515|GO:0005737|GO:0016787|GO:0045944|GO:0008152|GO:0005730|GO:0005634|GO:0070062|GO:0005829	GO:0005515=protein binding|GO:0016787=hydrolase activity	GO:0005634=nucleus|GO:0070062=extracellular exosome|GO:0005737=cytoplasm|GO:0005829=cytosol|GO:0005730=nucleolus	GO:0008152=metabolic process|GO:0045944=positive regulation of transcription from RNA polymerase II promoter	THC2599446	ENST00000361143	Hs.420796	84836
ABHD15	0.145996	Detected	-0.145996	Detected	0	-0.211356	Detected	0.26585	Detected	0.0272467	0.931287	220	155	156	199	NM_198147	ref|Homo sapiens abhydrolase domain containing 15 (ABHD15), mRNA [NM_198147]	abhydrolase domain containing 15	ref|NM_198147|ens|ENST00000307201|gb|AY358212|gb|AK056717	GO:0016787|GO:0016020|GO:0008152|GO:0005576	GO:0016787=hydrolase activity	GO:0016020=membrane|GO:0005576=extracellular region	GO:0008152=metabolic process	THC2471398	ENST00000307201	Hs.106510	116236
ABHD16B	-0.147619	Compromised	0.147618	Compromised	-4.7e-07	0.259635	Compromised	0.427038	Compromised	0.343336	0.180379	1.71	1.81	2.06	2.12	NM_080622	ref|Homo sapiens abhydrolase domain containing 16B (ABHD16B), mRNA [NM_080622]	abhydrolase domain containing 16B	ref|NM_080622|ens|ENST00000369916|gb|BC031949|tc|THC2479060	GO:0016787|GO:0008152	GO:0016787=hydrolase activity		GO:0008152=metabolic process	THC2479060	ENST00000369916	Hs.266774	140701
ABHD17A	-0.106363	Detected	0.106363	Detected	0	0.0689824	Detected	-0.267919	Detected	-0.0994685	0.667088	1110.73	1110.33	1139.38	826.656	NM_031213	ref|Homo sapiens abhydrolase domain containing 17A (ABHD17A), transcript variant 1, mRNA [NM_031213]	abhydrolase domain containing 17A	ref|NM_031213|ref|NM_001130111|ens|ENST00000411545|ens|ENST00000592757	GO:0005515|GO:0008150|GO:0016787|GO:0016020|GO:0008152|GO:0005576	GO:0005515=protein binding|GO:0016787=hydrolase activity	GO:0016020=membrane|GO:0005576=extracellular region	GO:0008150=biological_process|GO:0008152=metabolic process	THC2551680	ENST00000411545	Hs.465542	81926
ABHD17B	0.0735555	Detected	-0.0735555	Detected	0	-0.0603132	Detected	0.403525	Detected	0.171606	0.553694	147.784	115.119	122.35	154.635	NM_001025780	ref|Homo sapiens abhydrolase domain containing 17B (ABHD17B), transcript variant 2, mRNA [NM_001025780]	abhydrolase domain containing 17B	ref|NM_001025780|ens|ENST00000333421|ref|XM_006717134|gb|BC044576	GO:0016787|GO:0016020|GO:0008152|GO:0005576	GO:0016787=hydrolase activity	GO:0016020=membrane|GO:0005576=extracellular region	GO:0008152=metabolic process	THC2484355	ENST00000377041	Hs.380389	51104
ABHD17C	-0.00624919	Detected	0.00624919	Detected	0	-0.0317233	Detected	0.519218	Detected	0.243747	0.469687	893	777	797	1070	NM_021214	ref|Homo sapiens abhydrolase domain containing 17C (ABHD17C), mRNA [NM_021214]	abhydrolase domain containing 17C	ref|NM_021214|ens|ENST00000258884|ens|ENST00000558464|ens|ENST00000559506	GO:0016787|GO:0008152	GO:0016787=hydrolase activity		GO:0008152=metabolic process	THC2464839	ENST00000258884	Hs.459072	58489
ABHD2	0.279051	Detected	-0.279051	Detected	0	-0.078707	Detected	-0.586852	Detected	-0.332779	0.470902	82.1	48.1	58.2	37.5	NM_007011	ref|Homo sapiens abhydrolase domain containing 2 (ABHD2), transcript variant 1, mRNA [NM_007011]	abhydrolase domain containing 2	ref|NM_007011|ref|NM_152924|ens|ENST00000352732|ens|ENST00000355100	GO:0052689|GO:0008150|GO:0003674|GO:0030336|GO:0008152|GO:0009611|GO:0016021	GO:0052689=carboxylic ester hydrolase activity|GO:0003674=molecular_function	GO:0016021=integral component of membrane	GO:0008150=biological_process|GO:0008152=metabolic process|GO:0009611=response to wounding|GO:0030336=negative regulation of cell migration	THC2491788	ENST00000352732	Hs.122337	11057
ABHD3	0.130563	Detected	-0.130563	Detected	0	-0.290258	Detected	-0.0627935	Detected	-0.176526	0.415225	364	262	247	265	NM_138340	ref|Homo sapiens abhydrolase domain containing 3 (ABHD3), mRNA [NM_138340]	abhydrolase domain containing 3	ref|NM_138340|ens|ENST00000577564|ens|ENST00000289119|ref|XR_243847	GO:0052689|GO:0008150|GO:0003674|GO:0008152|GO:0016021|GO:0005575	GO:0052689=carboxylic ester hydrolase activity|GO:0003674=molecular_function	GO:0016021=integral component of membrane|GO:0005575=cellular_component	GO:0008150=biological_process|GO:0008152=metabolic process	THC2687867	ENST00000577564	Hs.397978	171586
ABHD4	-0.0789406	Detected	0.0789406	Detected	0	0.150119	Detected	-0.0618551	Detected	0.044132	0.770188	850	818	905	716	NM_022060	ref|Homo sapiens abhydrolase domain containing 4 (ABHD4), mRNA [NM_022060]	abhydrolase domain containing 4	ref|NM_022060|ens|ENST00000428304|ref|XR_245712|ref|XM_005267986	GO:0016042|GO:0016787	GO:0016787=hydrolase activity		GO:0016042=lipid catabolic process	THC2462099	ENST00000428304	Hs.445665	63874
ABHD5	0.0412905	Detected	-0.0412905	Detected	0	-0.0384495	Detected	-0.103766	Detected	-0.0711076	0.309316	1780	1450	1530	1340	NM_016006	ref|Homo sapiens abhydrolase domain containing 5 (ABHD5), mRNA [NM_016006]	abhydrolase domain containing 5	ref|NM_016006|ens|ENST00000458276|gb|AF151816|gb|BC021958	GO:0005811|GO:0004806|GO:0042171|GO:0010898|GO:0005634|GO:0044281|GO:0003841|GO:0030154|GO:0043231|GO:0005829|GO:0005737|GO:0010891|GO:0006631|GO:0019433|GO:0006654|GO:0051006	GO:0003841=1-acylglycerol-3-phosphate O-acyltransferase activity|GO:0042171=lysophosphatidic acid acyltransferase activity|GO:0004806=triglyceride lipase activity	GO:0005811=lipid particle|GO:0005634=nucleus|GO:0005737=cytoplasm|GO:0043231=intracellular membrane-bounded organelle|GO:0005829=cytosol	GO:0010891=negative regulation of sequestering of triglyceride|GO:0006631=fatty acid metabolic process|GO:0006654=phosphatidic acid biosynthetic process|GO:0044281=small molecule metabolic process|GO:0030154=cell differentiation|GO:0010898=positive regulation of triglyceride catabolic process|GO:0019433=triglyceride catabolic process|GO:0051006=positive regulation of lipoprotein lipase activity	THC2464058	ENST00000458276	Hs.19385	51099
ABHD6	0.0796168	Detected	-0.0796168	Detected	0	0.0390899	Detected	0.14041	Detected	0.08975	0.44195	334	258	295	290	NM_020676	ref|Homo sapiens abhydrolase domain containing 6 (ABHD6), mRNA [NM_020676]	abhydrolase domain containing 6	ref|NM_020676|ens|ENST00000478253|ens|ENST00000613521|ens|ENST00000295962	GO:0005739|GO:0030336|GO:0032281|GO:0008152|GO:0047372|GO:0060292|GO:2000124|GO:0070062	GO:0047372=acylglycerol lipase activity	GO:0032281=AMPA glutamate receptor complex|GO:0070062=extracellular exosome|GO:0005739=mitochondrion	GO:0008152=metabolic process|GO:2000124=regulation of endocannabinoid signaling pathway|GO:0060292=long term synaptic depression|GO:0030336=negative regulation of cell migration	THC2516111	ENST00000478253	Hs.476454	57406
ABHD8	0.00129151	Detected	-0.00129151	Detected	0	0.0998619	Detected	0.178227	Detected	0.139045	0.0711206	475	409	462	447	NM_024527	ref|Homo sapiens abhydrolase domain containing 8 (ABHD8), mRNA [NM_024527]	abhydrolase domain containing 8	ref|NM_024527|ens|ENST00000247706|gb|AK021805|gb|BC011536	GO:0016787|GO:0008152|GO:0070062	GO:0016787=hydrolase activity	GO:0070062=extracellular exosome	GO:0008152=metabolic process	THC2467201	ENST00000247706	Hs.515664	79575
ABI1	0.0480421	Detected	-0.0480421	Detected	0	-0.28869	Detected	0.410478	Detected	0.0608938	0.878875	228	184	164	244	NM_005470	ref|Homo sapiens abl-interactor 1 (ABI1), transcript variant 1, mRNA [NM_005470]	abl-interactor 1	ref|NM_005470|ref|NM_001178116|ref|NM_001012750|ref|NM_001178119	GO:0008092|GO:0005515|GO:0031209|GO:0008285|GO:0030054|GO:0005783|GO:0061098|GO:0001756|GO:0006928|GO:0005634|GO:0030175|GO:0032403|GO:0005829|GO:0030426|GO:0005622|GO:0030296|GO:0045211|GO:0005856|GO:0070062|GO:0072673|GO:0048010|GO:0014069|GO:0018108|GO:0030027|GO:0035855|GO:0008154|GO:0045087|GO:0007169|GO:0038096	GO:0032403=protein complex binding|GO:0005515=protein binding|GO:0030296=protein tyrosine kinase activator activity|GO:0008092=cytoskeletal protein binding	GO:0014069=postsynaptic density|GO:0030426=growth cone|GO:0070062=extracellular exosome|GO:0045211=postsynaptic membrane|GO:0005829=cytosol|GO:0030027=lamellipodium|GO:0005783=endoplasmic reticulum|GO:0005622=intracellular|GO:0031209=SCAR complex|GO:0005634=nucleus|GO:0005856=cytoskeleton|GO:0030054=cell junction|GO:0030175=filopodium	GO:0018108=peptidyl-tyrosine phosphorylation|GO:0008285=negative regulation of cell proliferation|GO:0061098=positive regulation of protein tyrosine kinase activity|GO:0038096=Fc-gamma receptor signaling pathway involved in phagocytosis|GO:0035855=megakaryocyte development|GO:0008154=actin polymerization or depolymerization|GO:0007169=transmembrane receptor protein tyrosine kinase signaling pathw…	THC2462802	ENST00000346832	Hs.508148	10006
ABI2	-0.0929077	Detected	0.0929077	Detected	0	0.0779383	Detected	-0.215551	Detected	-0.0688064	0.730256	53.1	52.1	54.3	40.6	NM_005759	ref|Homo sapiens abl-interactor 2 (ABI2), transcript variant 3, mRNA [NM_005759]	abl-interactor 2	ref|NM_005759|ref|NM_001282925|ref|NM_001282932|ref|NM_001282926	GO:0005515|GO:0031209|GO:0017124|GO:0006928|GO:0018108|GO:0030175|GO:0032403|GO:0003677|GO:0030027|GO:0005829|GO:0048365|GO:0005737|GO:0016601|GO:0016477|GO:0008154|GO:0007010|GO:2000601|GO:0019900|GO:0005856|GO:0070064|GO:0031625|GO:0008093	GO:0008093=cytoskeletal adaptor activity|GO:0003677=DNA binding|GO:0070064=proline-rich region binding|GO:0005515=protein binding|GO:0031625=ubiquitin protein ligase binding|GO:0048365=Rac GTPase binding|GO:0017124=SH3 domain binding|GO:0032403=protein complex binding|GO:0019900=kinase binding	GO:0031209=SCAR complex|GO:0005856=cytoskeleton|GO:0005737=cytoplasm|GO:0030175=filopodium|GO:0005829=cytosol|GO:0030027=lamellipodium	GO:0016601=Rac protein signal transduction|GO:0018108=peptidyl-tyrosine phosphorylation|GO:0007010=cytoskeleton organization|GO:0008154=actin polymerization or depolymerization|GO:0006928=movement of cell or subcellular component|GO:2000601=positive regulation of Arp2/3 complex-mediated actin nucleation|GO:0016477=cell migration	THC2570024	ENST00000261018	Hs.471156	10152
ABI3	-0.259526	Detected	0.259526	Detected	2.5e-07	-0.081392	Detected	-0.306881	Detected	-0.194136	0.563511	14.4	17.8	14.8	11.6	NM_016428	ref|Homo sapiens ABI family, member 3 (ABI3), transcript variant 1, mRNA [NM_016428]	ABI family, member 3	ref|NM_016428|ref|NM_001135186|ens|ENST00000419580|ens|ENST00000225941	GO:0030334|GO:0005622|GO:0005515|GO:0005737|GO:0016020|GO:0006928|GO:0018108|GO:0030027	GO:0005515=protein binding	GO:0005737=cytoplasm|GO:0016020=membrane|GO:0005622=intracellular|GO:0030027=lamellipodium	GO:0018108=peptidyl-tyrosine phosphorylation|GO:0006928=movement of cell or subcellular component|GO:0030334=regulation of cell migration	THC2604731	ENST00000419580	Hs.130719	51225
ABI3BP	-0.201578	Compromised	0.201579	Compromised	4.8e-07	-0.183302	Compromised	0.00236321	Compromised	-0.0904696	0.723022	2.22406	2.53698	2.04609	2.13251	NM_015429	ref|Homo sapiens ABI family, member 3 (NESH) binding protein (ABI3BP), mRNA [NM_015429]	ABI family, member 3 (NESH) binding protein	ref|NM_015429|ens|ENST00000475896|ens|ENST00000284322|ref|XM_005247318	GO:0031012|GO:0030198|GO:0010811|GO:0005518|GO:0005614|GO:0008201|GO:0005615	GO:0005518=collagen binding|GO:0008201=heparin binding	GO:0005615=extracellular space|GO:0005614=interstitial matrix|GO:0031012=extracellular matrix	GO:0030198=extracellular matrix organization|GO:0010811=positive regulation of cell-substrate adhesion	THC2483291	ENST00000284322	Hs.477015	25890
ABL1	-0.0711527	Detected	0.0711527	Detected	0	-0.0621176	Detected	-0.421957	Detected	-0.242037	0.337443	183.622	174.812	167.85	119.86	NM_007313	ref|Homo sapiens ABL proto-oncogene 1, non-receptor tyrosine kinase (ABL1), transcript variant b, mRNA [NM_007313]	ABL proto-oncogene 1, non-receptor tyrosine kinase	ref|NM_007313|ens|ENST00000372348|gb|M14753|gb|AB209456	GO:0005515|GO:0002333|GO:0046632|GO:0050731|GO:0048538|GO:0048536|GO:0030155|GO:0030154|GO:0042692|GO:0007173|GO:0007411|GO:0030100|GO:0042127|GO:0034446|GO:0006298|GO:0043123|GO:0033690|GO:0038083|GO:0006979|GO:0043124|GO:0019905|GO:0031965|GO:0022408|GO:0000287|GO:0002322|GO:0021587|GO:0018108|GO:0031234|GO:0042770|GO:0045931|GO:0045930|GO:0045087|GO:0004515|GO:0010506|GO:0005654|GO:0038096|GO:…	GO:0008022=protein C-terminus binding|GO:0030145=manganese ion binding|GO:0019905=syntaxin binding|GO:0004672=protein kinase activity|GO:0003785=actin monomer binding|GO:0005515=protein binding|GO:0000287=magnesium ion binding|GO:0005524=ATP binding|GO:0004515=nicotinate-nucleotide adenylyltransferase activity|GO:0004713=protein tyrosine kinase activity|GO:0004715=non-membrane spanning protein ty…	GO:0015629=actin cytoskeleton|GO:0031234=extrinsic component of cytoplasmic side of plasma membrane|GO:0005829=cytosol|GO:0005634=nucleus|GO:0005730=nucleolus|GO:0005654=nucleoplasm|GO:0031252=cell leading edge|GO:0031965=nuclear membrane|GO:0048471=perinuclear region of cytoplasm|GO:0005737=cytoplasm|GO:0005739=mitochondrion	GO:0007050=cell cycle arrest|GO:0018108=peptidyl-tyrosine phosphorylation|GO:0007173=epidermal growth factor receptor signaling pathway|GO:0022408=negative regulation of cell-cell adhesion|GO:0042770=signal transduction in response to DNA damage|GO:0007411=axon guidance|GO:0002322=B cell proliferation involved in immune response|GO:0006914=autophagy|GO:0030100=regulation of endocytosis|GO:0033690…	NP523662	ENST00000318560	Hs.431048	25
ABL2	-0.684109	Detected	0.684109	Detected	0	0.741803	Detected	0.77935	Detected	0.760577	0.382113	73.1316	162.85	178.494	167.881	NM_007314	ref|Homo sapiens ABL proto-oncogene 2, non-receptor tyrosine kinase (ABL2), transcript variant b, mRNA [NM_007314]	ABL proto-oncogene 2, non-receptor tyrosine kinase	ref|NM_007314|ref|NM_001168236|ref|NM_005158|ref|NM_001168237	GO:0005515|GO:0006909|GO:0051353|GO:0071300|GO:0046632|GO:2000145|GO:2000096|GO:0030155|GO:2000249|GO:0051015|GO:0007173|GO:0007411|GO:0030100|GO:0042127|GO:0050885|GO:0070374|GO:0043123|GO:0038083|GO:0051017|GO:0035640|GO:0022408|GO:0000287|GO:0021587|GO:0018108|GO:0001891|GO:0030027|GO:0031234|GO:0097062|GO:0008542|GO:0045087|GO:0010976|GO:0010506|GO:0035024|GO:0015629|GO:0007204|GO:0005829|GO:…	GO:0030145=manganese ion binding|GO:0004672=protein kinase activity|GO:0003785=actin monomer binding|GO:0051015=actin filament binding|GO:0005515=protein binding|GO:0000287=magnesium ion binding|GO:0005524=ATP binding|GO:0004713=protein tyrosine kinase activity|GO:0004715=non-membrane spanning protein tyrosine kinase activity|GO:0005102=receptor binding	GO:0043197=dendritic spine|GO:0015629=actin cytoskeleton|GO:0031234=extrinsic component of cytoplasmic side of plasma membrane|GO:0005829=cytosol|GO:0030027=lamellipodium|GO:0001891=phagocytic cup	GO:0018108=peptidyl-tyrosine phosphorylation|GO:0035640=exploration behavior|GO:0032092=positive regulation of protein binding|GO:0007173=epidermal growth factor receptor signaling pathway|GO:0022408=negative regulation of cell-cell adhesion|GO:0007411=axon guidance|GO:0008542=visual learning|GO:0010976=positive regulation of neuron projection development|GO:0030100=regulation of endocytosis|GO:2…	THC2501440	ENST00000502732	Hs.159472	27
ABLIM1	-0.0112734	Detected	0.0112734	Detected	0	-0.0236306	Detected	0.160742	Detected	0.0685558	0.537279	86.5159	75.8037	77.9205	81.1388	NM_001003408	ref|Homo sapiens actin binding LIM protein 1 (ABLIM1), transcript variant 3, mRNA [NM_001003408]	actin binding LIM protein 1	ref|NM_001003408|ref|NM_001003407|ref|NM_002313|ref|NM_006720	GO:0005515|GO:0001725|GO:0030032|GO:0003779|GO:0015629|GO:0030027|GO:0042384|GO:0005737|GO:0007411|GO:0045944|GO:0007010|GO:0009887|GO:0008270|GO:0007601	GO:0008270=zinc ion binding|GO:0005515=protein binding|GO:0003779=actin binding	GO:0005737=cytoplasm|GO:0001725=stress fiber|GO:0015629=actin cytoskeleton|GO:0030027=lamellipodium	GO:0007010=cytoskeleton organization|GO:0007411=axon guidance|GO:0045944=positive regulation of transcription from RNA polymerase II promoter|GO:0007601=visual perception|GO:0009887=organ morphogenesis|GO:0042384=cilium assembly|GO:0030032=lamellipodium assembly	THC2610804	ENST00000369252	Hs.438236	3983
ABLIM2	0.173373	Detected	-0.173373	Detected	0	0.156189	Detected	0.796238	Detected	0.476213	0.320891	67.8657	46.0337	60.919	86.9965	NM_001130083	ref|Homo sapiens actin binding LIM protein family, member 2 (ABLIM2), transcript variant 1, mRNA [NM_001130083]	actin binding LIM protein family, member 2	ref|NM_001130083|ref|NM_001130084|ref|NM_001130085|ref|NM_001130086	GO:0030036|GO:0007411|GO:0045944|GO:0008270|GO:0003779|GO:0030016|GO:0015629|GO:0006351	GO:0008270=zinc ion binding|GO:0003779=actin binding	GO:0015629=actin cytoskeleton|GO:0030016=myofibril	GO:0006351=transcription, DNA-templated|GO:0007411=axon guidance|GO:0045944=positive regulation of transcription from RNA polymerase II promoter|GO:0030036=actin cytoskeleton organization	NP1277327	ENST00000514025	Hs.233404	84448
ABLIM3	-0.141132	Detected	0.141132	Detected	0	0.00628281	Detected	-0.100779	Detected	-0.0472479	0.783893	65.3	68.5	65.7	55.9	NM_014945	ref|Homo sapiens actin binding LIM protein family, member 3 (ABLIM3), transcript variant 2, mRNA [NM_014945]	actin binding LIM protein family, member 3	ref|NM_014945|ref|NM_001301028|ref|NM_001301015|ref|NM_001301027	GO:0042384|GO:0005737|GO:0001725|GO:0030036|GO:0007411|GO:0045944|GO:0030032|GO:0008270|GO:0003779|GO:0030027|GO:0006351	GO:0008270=zinc ion binding|GO:0003779=actin binding	GO:0005737=cytoplasm|GO:0001725=stress fiber|GO:0030027=lamellipodium	GO:0006351=transcription, DNA-templated|GO:0042384=cilium assembly|GO:0007411=axon guidance|GO:0030032=lamellipodium assembly|GO:0045944=positive regulation of transcription from RNA polymerase II promoter|GO:0030036=actin cytoskeleton organization	THC2620690	ENST00000506113	Hs.49688	22885
ABO	0.0790563	Detected	-0.0790563	Detected	0	0.0286779	Detected	-0.472411	Detected	-0.221866	0.487306	77.7851	60.1322	68.2349	44.1813	ENST00000453660	ens|ABO blood group (transferase A, alpha 1-3-N-acetylgalactosaminyltransferase; transferase B, alpha 1-3-galactosyltransferase) [Source:HGNC Symbol;Acc:HGNC:79] [ENST00000453660]	ABO blood group (transferase A, alpha 1-3-N-acetylgalactosaminyltransferase; transferase B, alpha 1-3-galactosyltransferase)	ens|ENST00000453660|linc|lnc-OBP2B-1:1|linc|TCONS_00016890|gb|AK124587	GO:0004381|GO:0032580|GO:0004380|GO:0006486|GO:0005576|GO:0016021|GO:0046872	GO:0004380=glycoprotein-fucosylgalactoside alpha-N-acetylgalactosaminyltransferase activity|GO:0046872=metal ion binding|GO:0004381=fucosylgalactoside 3-alpha-galactosyltransferase activity	GO:0032580=Golgi cisterna membrane|GO:0016021=integral component of membrane|GO:0005576=extracellular region	GO:0006486=protein glycosylation	THC2491790	ENST00000453660	Hs.654423	28
ABR	0.0537643	Detected	-0.0537643	Detected	0	0.0505457	Detected	4.14465	Detected	2.0976	0.413395	281.283	225.207	254.947	3990	NM_021962	ref|Homo sapiens active BCR-related (ABR), transcript variant 1, mRNA [NM_021962]	active BCR-related	ref|NM_021962|ref|NM_001159746|ref|NM_001092|ref|NM_001282149	GO:0043314|GO:0051056|GO:0048011|GO:0030336|GO:0043065|GO:0030036|GO:0042472|GO:0005886|GO:0007264|GO:0097190|GO:0032855|GO:0005829|GO:0050766|GO:0016020|GO:0007420|GO:0050728|GO:0050885|GO:0032496|GO:0005089|GO:0030675|GO:0005096	GO:0005096=GTPase activator activity|GO:0005089=Rho guanyl-nucleotide exchange factor activity|GO:0030675=GTPase activator activity	GO:0005886=plasma membrane|GO:0016020=membrane|GO:0005829=cytosol	GO:0007264=small GTPase mediated signal transduction|GO:0050728=negative regulation of inflammatory response|GO:0097190=apoptotic signaling pathway|GO:0007420=brain development|GO:0043314=negative regulation of neutrophil degranulation|GO:0048011=neurotrophin TRK receptor signaling pathway|GO:0051056=regulation of small GTPase mediated signal transduction|GO:0043065=positive regulation of apoptot…	THC2498261	ENST00000544583	Hs.159306	29
ABRA	0.184515	Compromised	-0.184515	Compromised	4.8e-07	-0.120917	Compromised	0.104114	Compromised	-0.00840163	0.97252	2.68	1.79	1.97	2.11	NM_139166	ref|Homo sapiens actin-binding Rho activating protein (ABRA), mRNA [NM_139166]	actin-binding Rho activating protein	ref|NM_139166|ens|ENST00000311955|gb|AK056976|gb|AL833422	GO:0051091|GO:0005886|GO:0045944|GO:0035025|GO:0003713|GO:0003779|GO:0015629|GO:0030017|GO:0006351|GO:0000060	GO:0003713=transcription coactivator activity|GO:0003779=actin binding	GO:0015629=actin cytoskeleton|GO:0005886=plasma membrane|GO:0030017=sarcomere	GO:0035025=positive regulation of Rho protein signal transduction|GO:0006351=transcription, DNA-templated|GO:0000060=protein import into nucleus, translocation|GO:0051091=positive regulation of sequence-specific DNA binding transcription factor activity|GO:0045944=positive regulation of transcription from RNA polymerase II promoter	THC2601291	ENST00000311955	Hs.374668	137735
ABRACL	0.000674725	Detected	-0.000675201	Detected	-4.768e-07	0.127503	Detected	0.193113	Detected	0.160308	0.0394324	12300	10600	12200	11700	NM_021243	ref|Homo sapiens ABRA C-terminal like (ABRACL), mRNA [NM_021243]	ABRA C-terminal like	ref|NM_021243|ens|ENST00000367660|gb|BC014953|gb|AF161398					THC2463611	ENST00000367660	Hs.600861	58527
ABT1	0.0897286	Detected	-0.0897286	Detected	0	-0.0188262	Detected	0.245985	Detected	0.113579	0.551267	235	179	198	218	NM_013375	ref|Homo sapiens activator of basal transcription 1 (ABT1), mRNA [NM_013375]	activator of basal transcription 1	ref|NM_013375|ens|ENST00000274849|tc|THC2466588|tc|THC2659638	GO:0005515|GO:0005667|GO:0021522|GO:0006366|GO:0006357|GO:0000166|GO:0003713|GO:0005730|GO:0005634|GO:0003677	GO:0000166=nucleotide binding|GO:0003677=DNA binding|GO:0005515=protein binding|GO:0003713=transcription coactivator activity	GO:0005667=transcription factor complex|GO:0005634=nucleus|GO:0005730=nucleolus	GO:0021522=spinal cord motor neuron differentiation|GO:0006366=transcription from RNA polymerase II promoter|GO:0006357=regulation of transcription from RNA polymerase II promoter	THC2466588	ENST00000274849	Hs.254406	29777
ABTB1	-0.0209801	Detected	0.0209801	Detected	0	0.203822	Detected	0.191988	Detected	0.197905	0.0119158	445.399	395.537	472.821	429.744	NM_032548	ref|Homo sapiens ankyrin repeat and BTB (POZ) domain containing 1 (ABTB1), transcript variant 1, mRNA [NM_032548]	ankyrin repeat and BTB (POZ) domain containing 1	ref|NM_032548|ref|NM_172027|ref|NR_033429|ens|ENST00000464431	GO:0005737|GO:0005886|GO:0005730|GO:0003746|GO:0006414	GO:0003746=translation elongation factor activity	GO:0005737=cytoplasm|GO:0005730=nucleolus|GO:0005886=plasma membrane	GO:0006414=translational elongation	NP852599	ENST00000464431	Hs.107812	80325
ABTB2	-0.0433981	Detected	0.0433981	Detected	0	0.0333683	Detected	0.083688	Detected	0.0585282	0.363613	1430	1310	1370	1300	NM_145804	ref|Homo sapiens ankyrin repeat and BTB (POZ) domain containing 2 (ABTB2), mRNA [NM_145804]	ankyrin repeat and BTB (POZ) domain containing 2	ref|NM_145804|ens|ENST00000435224|gb|AK095632|gb|AK091560	GO:0003674|GO:0046982|GO:0097237|GO:0005654|GO:0005634|GO:0005575	GO:0046982=protein heterodimerization activity|GO:0003674=molecular_function	GO:0005634=nucleus|GO:0005575=cellular_component|GO:0005654=nucleoplasm	GO:0097237=cellular response to toxic substance	THC2464560	ENST00000435224	Hs.23361	25841
ACAA1	-0.00726938	Detected	0.00726986	Detected	4.768e-07	-0.229374	Detected	0.0771818	Detected	-0.0760961	0.669098	4430	3860	3450	3910	ENST00000451419	ens|acetyl-CoA acyltransferase 1 [Source:HGNC Symbol;Acc:HGNC:82] [ENST00000451419]	acetyl-CoA acyltransferase 1	ens|ENST00000451419|linc|lnc-ACAA1-1:1|gb|BG533949	GO:0005515|GO:0000038|GO:0006635|GO:0016401|GO:0005782|GO:0044281|GO:0036109|GO:0033559|GO:0043231|GO:0016020|GO:0008206|GO:0033540|GO:0003988|GO:0044255|GO:0005777	GO:0005515=protein binding|GO:0003988=acetyl-CoA C-acyltransferase activity|GO:0016401=palmitoyl-CoA oxidase activity	GO:0005782=peroxisomal matrix|GO:0005777=peroxisome|GO:0043231=intracellular membrane-bounded organelle|GO:0016020=membrane	GO:0033540=fatty acid beta-oxidation using acyl-CoA oxidase|GO:0044255=cellular lipid metabolic process|GO:0000038=very long-chain fatty acid metabolic process|GO:0008206=bile acid metabolic process|GO:0044281=small molecule metabolic process|GO:0006635=fatty acid beta-oxidation|GO:0036109=alpha-linolenic acid metabolic process|GO:0033559=unsaturated fatty acid metabolic process		ENST00000451419	Hs.706310	30
ACAA2	0.0701964	Detected	-0.0701964	Detected	0	-0.0777199	Detected	0.0699575	Detected	-0.00388122	0.973072	1610	1260	1320	1340	NM_006111	ref|Homo sapiens acetyl-CoA acyltransferase 2 (ACAA2), mRNA [NM_006111]	acetyl-CoA acyltransferase 2	ref|NM_006111|ens|ENST00000591171|gb|AK054673|gb|AK093311	GO:0005739|GO:0005515|GO:0006695|GO:0006631|GO:0005743|GO:0071456|GO:0003988|GO:0070062	GO:0005515=protein binding|GO:0003988=acetyl-CoA C-acyltransferase activity	GO:0070062=extracellular exosome|GO:0005739=mitochondrion|GO:0005743=mitochondrial inner membrane	GO:0006695=cholesterol biosynthetic process|GO:0071456=cellular response to hypoxia|GO:0006631=fatty acid metabolic process	THC2469571	ENST00000591171	Hs.200136	10449
ACACA	0.084697	Detected	-0.084697	Detected	0	-0.069401	Detected	0.0282428	Detected	-0.0205791	0.852773	650.6	499.032	531.131	520.799	NM_198839	ref|Homo sapiens acetyl-CoA carboxylase alpha (ACACA), transcript variant 2, mRNA [NM_198839]	acetyl-CoA carboxylase alpha	ref|NM_198839|ref|NM_198834|ref|NM_198836|ens|ENST00000612007	GO:0005515|GO:0006768|GO:0006767|GO:0035338|GO:0044281|GO:0015629|GO:0046872|GO:0005829|GO:0005739|GO:0005737|GO:0001894|GO:0051289|GO:0019432|GO:0006633|GO:0003989|GO:0044255|GO:0070062|GO:0006853|GO:0055088|GO:0005730|GO:2001295|GO:0006084|GO:0005524|GO:0006112|GO:0031325|GO:0006766|GO:0004075|GO:0044268	GO:0005524=ATP binding|GO:0003989=acetyl-CoA carboxylase activity|GO:0004075=biotin carboxylase activity|GO:0005515=protein binding|GO:0046872=metal ion binding	GO:0005730=nucleolus|GO:0070062=extracellular exosome|GO:0015629=actin cytoskeleton|GO:0005829=cytosol|GO:0005737=cytoplasm|GO:0005739=mitochondrion	GO:2001295=malonyl-CoA biosynthetic process|GO:0006084=acetyl-CoA metabolic process|GO:0044255=cellular lipid metabolic process|GO:0006766=vitamin metabolic process|GO:0044281=small molecule metabolic process|GO:0051289=protein homotetramerization|GO:0035338=long-chain fatty-acyl-CoA biosynthetic process|GO:0055088=lipid homeostasis|GO:0006112=energy reserve metabolic process|GO:0044268=multicell…	NP831371	ENST00000612007	Hs.160556	31
ACACB	0.12012	Detected	-0.12012	Detected	0	0.32676	Detected	-0.0442004	Detected	0.14128	0.58806	92.3753	67.4596	96.8359	68.6185	NM_001093	ref|Homo sapiens acetyl-CoA carboxylase beta (ACACB), mRNA [NM_001093]	acetyl-CoA carboxylase beta	ref|NM_001093|ens|ENST00000377848|ens|ENST00000338432|ref|XR_429097	GO:0005515|GO:0014070|GO:0006768|GO:0006767|GO:0060421|GO:0005741|GO:0005634|GO:0044281|GO:0046872|GO:0005829|GO:0005739|GO:0051289|GO:0006633|GO:0003989|GO:0044255|GO:0006853|GO:0042493|GO:0046322|GO:0010884|GO:2001295|GO:0006084|GO:0005524|GO:0012505|GO:0006112|GO:0031325|GO:0006766|GO:0009374|GO:0004075	GO:0009374=biotin binding|GO:0005524=ATP binding|GO:0003989=acetyl-CoA carboxylase activity|GO:0004075=biotin carboxylase activity|GO:0005515=protein binding|GO:0046872=metal ion binding	GO:0005829=cytosol|GO:0005741=mitochondrial outer membrane|GO:0005634=nucleus|GO:0005739=mitochondrion|GO:0012505=endomembrane system	GO:2001295=malonyl-CoA biosynthetic process|GO:0060421=positive regulation of heart growth|GO:0006084=acetyl-CoA metabolic process|GO:0044255=cellular lipid metabolic process|GO:0006766=vitamin metabolic process|GO:0044281=small molecule metabolic process|GO:0051289=protein homotetramerization|GO:0046322=negative regulation of fatty acid oxidation|GO:0006112=energy reserve metabolic process|GO:00…	THC2506477	ENST00000538526	Hs.234898	32
ACAD10	-0.10934	Detected	0.10934	Detected	0	0.0854866	Detected	-0.568466	Detected	-0.24149	0.556174	163.015	163.631	169.493	98.7117	NM_025247	ref|Homo sapiens acyl-CoA dehydrogenase family, member 10 (ACAD10), transcript variant 2, mRNA [NM_025247]	acyl-CoA dehydrogenase family, member 10	ref|NM_025247|ref|NM_001136538|ens|ENST00000547491|ens|ENST00000508303	GO:0005739|GO:0016787|GO:0050660|GO:0003995|GO:0055114|GO:0016772	GO:0003995=acyl-CoA dehydrogenase activity|GO:0050660=flavin adenine dinucleotide binding|GO:0016772=transferase activity, transferring phosphorus-containing groups|GO:0016787=hydrolase activity	GO:0005739=mitochondrion	GO:0055114=oxidation-reduction process	NP1163233	ENST00000413681	Hs.331141	80724
ACAD11	0.089262	Detected	-0.0892618	Detected	2.4e-07	-0.636229	Compromised	0.195971	Detected	-0.220129	0.656497	16.4	12.5	9.01	14.7	NM_032169	ref|Homo sapiens acyl-CoA dehydrogenase family, member 11 (ACAD11), mRNA [NM_032169]	acyl-CoA dehydrogenase family, member 11	ref|NM_032169|ref|NR_037804|ens|ENST00000485198|ens|ENST00000264990	GO:0017099|GO:0031966|GO:0050660|GO:0005634|GO:0070991|GO:0033539|GO:0004466|GO:0016772|GO:0005777	GO:0070991=medium-chain-acyl-CoA dehydrogenase activity|GO:0050660=flavin adenine dinucleotide binding|GO:0017099=very-long-chain-acyl-CoA dehydrogenase activity|GO:0016772=transferase activity, transferring phosphorus-containing groups|GO:0004466=long-chain-acyl-CoA dehydrogenase activity	GO:0005634=nucleus|GO:0005777=peroxisome|GO:0031966=mitochondrial membrane	GO:0033539=fatty acid beta-oxidation using acyl-CoA dehydrogenase	THC2478579	ENST00000485198	Hs.441378	84129
ACAD8	-0.048511	Detected	0.048511	Detected	0	-0.209122	Detected	-0.176798	Detected	-0.19296	0.0635947	64.6	59.6	52.5	49.2	NM_014384	ref|Homo sapiens acyl-CoA dehydrogenase family, member 8 (ACAD8), mRNA [NM_014384]	acyl-CoA dehydrogenase family, member 8	ref|NM_014384|ens|ENST00000531338|ens|ENST00000533387|ens|ENST00000281182	GO:0006629|GO:0034641|GO:0006355|GO:0005759|GO:0050660|GO:0006574|GO:0009083|GO:0003995|GO:0044281|GO:0006351|GO:0055114	GO:0003995=acyl-CoA dehydrogenase activity|GO:0050660=flavin adenine dinucleotide binding	GO:0005759=mitochondrial matrix	GO:0044281=small molecule metabolic process|GO:0009083=branched-chain amino acid catabolic process|GO:0006351=transcription, DNA-templated|GO:0006629=lipid metabolic process|GO:0006574=valine catabolic process|GO:0006355=regulation of transcription, DNA-templated|GO:0055114=oxidation-reduction process|GO:0034641=cellular nitrogen compound metabolic process	THC2711968	ENST00000531338	Hs.14791	27034
ACAD9	0.0113044	Detected	-0.0113049	Detected	-4.765e-07	-0.107948	Detected	-0.402074	Detected	-0.255011	0.225963	2838.5	2410.41	2373.92	1774.19	NM_014049	ref|Homo sapiens acyl-CoA dehydrogenase family, member 9 (ACAD9), transcript variant 1, mRNA [NM_014049]	acyl-CoA dehydrogenase family, member 9	ref|NM_014049|ref|NR_033426|ens|ENST00000511325|ens|ENST00000511526	GO:0005739|GO:0005515|GO:0032981|GO:0050660|GO:0005634|GO:0003995|GO:0030425|GO:0055114	GO:0003995=acyl-CoA dehydrogenase activity|GO:0005515=protein binding|GO:0050660=flavin adenine dinucleotide binding	GO:0005634=nucleus|GO:0030425=dendrite|GO:0005739=mitochondrion	GO:0055114=oxidation-reduction process|GO:0032981=mitochondrial respiratory chain complex I assembly	NP073436	ENST00000511325	Hs.567482	28976
ACADL	-0.146098	Compromised	0.146098	Compromised	0	0.27791	Compromised	1.54476	Compromised	0.911333	0.295983	1.6	1.69	1.95	4.3	NM_001608	ref|Homo sapiens acyl-CoA dehydrogenase, long chain (ACADL), mRNA [NM_001608]	acyl-CoA dehydrogenase, long chain	ref|NM_001608|ens|ENST00000233710|ref|XM_005246517|gb|M74096	GO:0090181|GO:0001659|GO:0006635|GO:0016401|GO:0031966|GO:0044242|GO:0050660|GO:0045717|GO:0046322|GO:0044281|GO:0019254|GO:0033539|GO:0004466|GO:0005739|GO:0005737|GO:0051289|GO:0005759|GO:0042758|GO:0003995|GO:0000062|GO:0044255|GO:0055114|GO:0042413	GO:0004466=long-chain-acyl-CoA dehydrogenase activity|GO:0003995=acyl-CoA dehydrogenase activity|GO:0050660=flavin adenine dinucleotide binding|GO:0000062=fatty-acyl-CoA binding|GO:0016401=palmitoyl-CoA oxidase activity	GO:0031966=mitochondrial membrane|GO:0005737=cytoplasm|GO:0005759=mitochondrial matrix|GO:0005739=mitochondrion	GO:0045717=negative regulation of fatty acid biosynthetic process|GO:0042758=long-chain fatty acid catabolic process|GO:0044255=cellular lipid metabolic process|GO:0042413=carnitine catabolic process|GO:0090181=regulation of cholesterol metabolic process|GO:0044281=small molecule metabolic process|GO:0006635=fatty acid beta-oxidation|GO:0033539=fatty acid beta-oxidation using acyl-CoA dehydrogena…	THC2473208	ENST00000233710	Hs.471277	33
ACADM	0.125001	Detected	-0.125001	Detected	0	-0.0595915	Detected	0.110208	Detected	0.0253084	0.882391	284	206	227	234	NM_000016	ref|Homo sapiens acyl-CoA dehydrogenase, C-4 to C-12 straight chain (ACADM), transcript variant 1, mRNA [NM_000016]	acyl-CoA dehydrogenase, C-4 to C-12 straight chain	ref|NM_000016|ref|NM_001286043|ref|NM_001127328|ref|NM_001286042	GO:0030424|GO:0006635|GO:0050660|GO:0005634|GO:0044281|GO:0019254|GO:0033539|GO:0042802|GO:0005739|GO:0005759|GO:0045329|GO:0051793|GO:0003995|GO:0051791|GO:0070991|GO:0044255|GO:0070062|GO:0055114	GO:0042802=identical protein binding|GO:0003995=acyl-CoA dehydrogenase activity|GO:0070991=medium-chain-acyl-CoA dehydrogenase activity|GO:0050660=flavin adenine dinucleotide binding	GO:0005634=nucleus|GO:0070062=extracellular exosome|GO:0005759=mitochondrial matrix|GO:0005739=mitochondrion|GO:0030424=axon	GO:0044255=cellular lipid metabolic process|GO:0045329=carnitine biosynthetic process|GO:0044281=small molecule metabolic process|GO:0006635=fatty acid beta-oxidation|GO:0033539=fatty acid beta-oxidation using acyl-CoA dehydrogenase|GO:0051793=medium-chain fatty acid catabolic process|GO:0019254=carnitine metabolic process, CoA-linked|GO:0051791=medium-chain fatty acid metabolic process|GO:005511…	THC2493080	ENST00000420607	Hs.445040	34
ACADS	0.0917916	Detected	-0.0917916	Detected	0	0.13235	Detected	-0.176453	Detected	-0.0220516	0.913518	76.1	57.8	71.1	52.6	NM_000017	ref|Homo sapiens acyl-CoA dehydrogenase, C-2 to C-3 short chain (ACADS), transcript variant 1, mRNA [NM_000017]	acyl-CoA dehydrogenase, C-2 to C-3 short chain	ref|NM_000017|ref|NM_001302554|ens|ENST00000242592|gb|AB527081	GO:0006635|GO:0031966|GO:0050660|GO:0004085|GO:0051384|GO:0005634|GO:0044281|GO:0033539|GO:0005739|GO:0042594|GO:0051289|GO:0005759|GO:0003995|GO:0000062|GO:0046359|GO:0044255	GO:0004085=butyryl-CoA dehydrogenase activity|GO:0003995=acyl-CoA dehydrogenase activity|GO:0050660=flavin adenine dinucleotide binding|GO:0000062=fatty-acyl-CoA binding	GO:0005634=nucleus|GO:0031966=mitochondrial membrane|GO:0005759=mitochondrial matrix|GO:0005739=mitochondrion	GO:0042594=response to starvation|GO:0046359=butyrate catabolic process|GO:0044255=cellular lipid metabolic process|GO:0044281=small molecule metabolic process|GO:0006635=fatty acid beta-oxidation|GO:0033539=fatty acid beta-oxidation using acyl-CoA dehydrogenase|GO:0051289=protein homotetramerization|GO:0051384=response to glucocorticoid	NP1199290	ENST00000242592	Hs.507076	35
ACADSB	0.0974371	Detected	-0.0974371	Detected	0	-0.212344	Detected	0.102291	Detected	-0.0550265	0.794232	294.153	221.675	215.574	245.689	NM_001609	ref|Homo sapiens acyl-CoA dehydrogenase, short/branched chain (ACADSB), mRNA [NM_001609]	acyl-CoA dehydrogenase, short/branched chain	ref|NM_001609|ens|ENST00000541070|ens|ENST00000358776|gb|AK298638	GO:0005739|GO:0034641|GO:0005759|GO:0050660|GO:0006631|GO:0009083|GO:0003995|GO:0044281|GO:0070062|GO:0055114	GO:0003995=acyl-CoA dehydrogenase activity|GO:0050660=flavin adenine dinucleotide binding	GO:0070062=extracellular exosome|GO:0005759=mitochondrial matrix|GO:0005739=mitochondrion	GO:0044281=small molecule metabolic process|GO:0009083=branched-chain amino acid catabolic process|GO:0055114=oxidation-reduction process|GO:0034641=cellular nitrogen compound metabolic process|GO:0006631=fatty acid metabolic process	THC2625298	ENST00000541070	Hs.81934	36
ACADVL	-0.0414939	Detected	0.0414934	Detected	-4.77e-07	-0.0218296	Detected	-0.496675	Detected	-0.259253	0.394618	13900	12700	12800	8440	NM_000018	ref|Homo sapiens acyl-CoA dehydrogenase, very long chain (ACADVL), transcript variant 1, mRNA [NM_000018]	acyl-CoA dehydrogenase, very long chain	ref|NM_000018|ref|NM_001270448|ref|NM_001270447|ref|NM_001033859	GO:0042645|GO:0090181|GO:0001659|GO:0006635|GO:0050660|GO:0045717|GO:0005730|GO:0005743|GO:0046322|GO:0005634|GO:0044281|GO:0033539|GO:0004466|GO:0030968|GO:0005739|GO:0005737|GO:0005759|GO:0030855|GO:0003995|GO:0006987|GO:0044267|GO:0044255|GO:0015980	GO:0004466=long-chain-acyl-CoA dehydrogenase activity|GO:0003995=acyl-CoA dehydrogenase activity|GO:0050660=flavin adenine dinucleotide binding	GO:0005730=nucleolus|GO:0005743=mitochondrial inner membrane|GO:0042645=mitochondrial nucleoid|GO:0005634=nucleus|GO:0005737=cytoplasm|GO:0005759=mitochondrial matrix|GO:0005739=mitochondrion	GO:0045717=negative regulation of fatty acid biosynthetic process|GO:0015980=energy derivation by oxidation of organic compounds|GO:0044267=cellular protein metabolic process|GO:0044255=cellular lipid metabolic process|GO:0090181=regulation of cholesterol metabolic process|GO:0044281=small molecule metabolic process|GO:0030855=epithelial cell differentiation|GO:0006635=fatty acid beta-oxidation|G…	NP1154386	ENST00000583858	Hs.437178	37
[truncated: 41,625 more rows]
